# Supplementary material for: The Aryne Phosphate Reaction
Source: PubMed Central journal article supplement (PMC9299019; doi:10.1002/anie.202113231), 2021-11-22
Supplement: ANIE-61-0-s001.pdf [file ANIE-61-0-s001.pdf]

## Supporting Information

### **The Aryne Phosphate Reaction\*\***

*Thomas M. Haas<sup>+</sup>, Stefan Wiesler<sup>+</sup>, Tobias Dürr-Mayer, Alexander Ripp, Paraskevi Fouka, Danye Qiu, and Henning J. Jessen\**

anie\_202113231\_sm\_miscellaneous\_information.pdf

## Table of content

1. General remarks
2. Screening overview
3. Syntheses adapted from literature
4. **Cluster 1:** Synthesis of (Pyro-)phosphomonoesters
5. **Cluster 2A:** Synthesis of (Pyro-)phosphodiesters (aryne-Scope)
6. **Cluster 2B:** Synthesis of (Pyro-)phosphodiesters (phosphate-Scope)
7. **Cluster 3:** Synthesis of Arylpolyphosphates (cyclophosphate reactions)
8. Synthesis of phosphate starting materials without literature precedence
9. Synthesis of aryne precursors without literature precedence
10. Synthesis of Amino-DEACM
11. Supporting references
12. NMR-spectra
13. MS – spectra
14. Structure Tables (X-ray data)

## Abbreviations

|                   |                                                                                  |
|-------------------|----------------------------------------------------------------------------------|
| d4T               | 1-[(2R,5S)-5-(Hydroxymethyl)-2,5-dihydrofuran-2-yl]-5-methylpyrimidine-2,4-dione |
| DBU               | 1,8-Diazabicyclo[5.4.0]undec-7-ene                                               |
| DEACM             | 7-(diethylamino)-4-(hydroxymethyl)-coumarine                                     |
| DCM               | Dichloromethane                                                                  |
| DMF               | Dimethylformamide                                                                |
| DMSO              | Dimethyl sulfoxide                                                               |
| Et <sub>2</sub> O | Diethyl ether                                                                    |
| ETT               | 5-(Ethylthio)-1 <i>H</i> -tetrazole                                              |
| Fm                | Fluorenylmethyl                                                                  |
| <i>m</i> CPBA     | <i>meta</i> -Chloroperoxybenzoic acid                                            |
| MeCN              | Acetonitrile                                                                     |
| HPLC              | Reverse phase high-performance liquid chromatography                             |
| HRMS              | High resolution mass spectrometry                                                |
| Pi                | Inorganic phosphate                                                              |
| PPi               | Inorganic pyrophosphate                                                          |
| qNMR              | Quantitative NMR                                                                 |
| RP-MPLC           | Reverse phase medium pressure liquid chromatography                              |
| SAX               | Strong anion exchange                                                            |
| TBA               | Tetrabutylammonium                                                               |
| TBAF              | Tetrabutylammoniumfluoride                                                       |
| TEA               | Triethylammonium                                                                 |
| TEAA              | Triethylammonium acetate                                                         |
| TMS               | Trimethylsilyl                                                                   |

## 1. General remarks

**Reactions** were carried out using glassware magnetically stirred, unless noted otherwise. Air- and moisture-sensitive liquids and solutions were transferred via syringe or stainless steel canula.

**Reagents** were purchased from commercial suppliers (Acros, Aldrich, Fluka, TCI) and used without further purification, unless noted otherwise.

**Solvents** were obtained in analytical grade and used as received for extractions, precipitation and solid washing.

**Dry solvents** for reactions were purchased in a dry form from Sigma and stored over molecular sieves as well as under the atmosphere of dry N<sub>2</sub>.

**Deuterated solvents** for NMR and reactions were obtained from Armar Chemicals, Switzerland and euriso-top, Germany, in the indicated purity grade and used as received for NMR spectroscopy.

**Strong ion-exchange chromatography** was performed using an automated Äkta® – system. Q-Sepharose was purchased from Aldrich. Buffer solutions were produced manually using milliQ H<sub>2</sub>O.

**TBA-salt preparations** were performed by either using DowexH<sup>+</sup> followed by TBA(OH) addition or Chelex®100 (preloaded with TBA). In both cases, the TBA salts were obtained after lyophilization.

**Commercially available phosphates** (e.g. phenylphosphate, phenylphosphonate) were transformed into their corresponding TBA-salts as described above.

**Commercially available aryne precursors** (2-(trimethylsilyl)phenyl triflate, 2-Bromo-6-(trimethylsilyl)phenyl triflate, Garg 4,5,-indolyne precursor) were purchased from Sigma and used without further purification.

**Preparative RP-MPLC** was performed using an automated Interchim® - system. The C18AQ-solid phase was purchased from Interchim.

**Lyophilizations** were done with Christ Freeze Dryer Alpha 1-4 LDplus and Christ Freeze Dryer Alpha 1-2 LDplus.

**<sup>1</sup>H-NMR spectra** were recorded on Bruker 300 MHz spectrometers, Bruker 400 MHz (with cryoprobe) and Bruker 500 MHz spectrometers in the indicated deuterated solvent. Data are reported as follows: chemical shift ( $\delta$ , ppm), multiplicity (s, singlet; d, doublet; t, triplet; q, quartet; m, multiplet; br. s, broad signal), coupling constant(s) ( $J$ , Hz), integration. All signals were referenced to the internal solvent signal as standard ( $D_2O$ ,  $\delta$  4.79; MeCN- $d_3$ ,  $\delta$  1.94, DMSO- $d_6$ ,  $\delta$  2.50,  $CDCl_3$ ,  $\delta$  7.26).

In some phosphate products there is still acetate (mostly as TBA-salt) present after RP-MPLC followed by lyophilization. These buffer residues were considered for yield determination. After  $NaClO_4$  – purification acetone residues were present in the products. These were also considered for yield determination.

**<sup>13</sup>C{<sup>1</sup>H}-NMR spectra** were recorded with <sup>1</sup>H-decoupling on Bruker 126 MHz, Bruker 101 MHz (with cryoprobe) spectrometers at 298K in the indicated deuterated solvent. If possible, signals were referred to the internal solvent signal as standard (MeCN- $d_3$ ,  $\delta$  1.32, DMSO- $d_6$ ,  $\delta$  39.52,  $CDCl_3$ ,  $\delta$  77.16).

**<sup>31</sup>P{<sup>1</sup>H}-NMR spectra and <sup>31</sup>P-NMR spectra** were recorded with <sup>1</sup>H-decoupling or <sup>1</sup>H coupling, respectively, on Bruker 202 MHz, 162 MHz (with cryoprobe) and Bruker 122 MHz spectrometers in the indicated deuterated solvent. All signals were referenced to an internal standard (PPP).

**Mass spectra** were recorded by C. Warth (Mass spectrometry service of the University of Freiburg) on a Thermo LCQ Advantage [spray voltage: 2.5 – 4.0 kV, spray current: 5  $\mu$ A, ion transfer tube: 250 (150) °C, evaporation temperature: 50 – 400°C.

## 2. Screening overview

The TBA-salt of pyrophosphate and 2-(trimethylsilyl)phenyl trifluoromethanesulfonate were used as a starting point for optimization of the aryne phosphate coupling (see supporting figure 1). The ratios between starting material and the arylated products was used as “reactivity” parameter: the higher the arylation rate, the better the reaction conditions. The turnover was determined by  $^{31}\text{P}$ -NMR analysis (see supporting figure 2). In summary, TBAF was the superior fluoride source. MeCN proved the most efficient solvent. A slow addition of the fluoride source was crucial for high turnover. A  $\text{PP}_i$  concentration of 80 mM was suitable and TBAF excess was not necessary. The optimized conditions are presented in table entry 12.

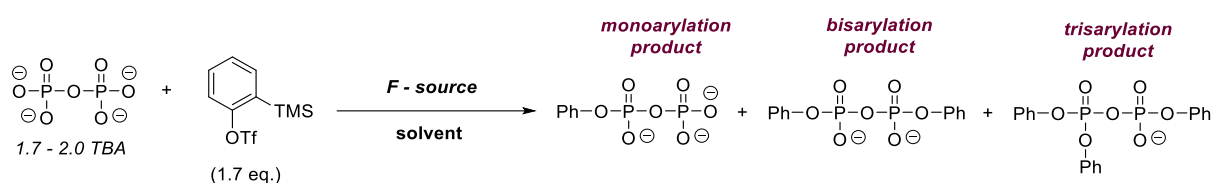

**Supporting figure 1:** model reaction used for optimizing F-source, solvent, temperature, addition time and concentration.

**Supporting table 1:** selected reaction conditions and corresponding turnover results: SM = starting material,  $\text{PP}_i$ , 1 = monoarylation product, 2 = bisarylation product, 3 = trisarylation product.

| varied Parameters | Nr. | solvent (conc.) | F-Source (eq.)           | Temp.[°C] | Addition time (F-source) | SM:1:2:3 [%] |
|-------------------|-----|-----------------|--------------------------|-----------|--------------------------|--------------|
| F-sources         | 1   | MeCN (80 mM)    | CsF (3 eq.)              | 25        | -                        | 54:42:4:0    |
|                   | 2   | MeCN (80 mM)    | KF (3 eq.)<br>12-crown-4 | 25        | -                        | 50:50:0:0    |
|                   | 3   | MeCN (80 mM)    | TBAF (3 eq.)             | 25        | 1 min                    | 36:54:10:0   |
| solvents          | 4   | Acetone (80 mM) | TBAF (3 eq.)             | 25        | 1 min                    | 41:53:6:0    |
|                   | 5   | DCM (80 mM)     | TBAF (3 eq.)             | 25        | 1 min                    | 76:23:1:0    |
|                   | 6   | THF (80 mM)     | TBAF (3 eq.)             | 25        | 1 min                    | 61:29:10:0   |
|                   | 7   | DME (80 mM)     | TBAF (3 eq.)             | 25        | 1 min                    | 93:4:3:0     |
| addition speed    | 8   | MeCN (80 mM)    | TBAF (3 eq.)             | 25        | 60 min                   | 21:43:29:7   |
| temperature       | 9   | MeCN (80 mM)    | TBAF (3 eq.)             | 0         | 60 min                   | 39:47:17:0   |
| concentration     | 10  | MeCN (110 mM)   | TBAF (3 eq.)             | 25        | 60 min                   | 44:48:8:0    |
|                   | 11  | MeCN (40 mM)    | TBAF (3.0 eq.)           | 25        | 60 min                   | 23:42:28:7   |
| F-source (equ.)   | 12  | MeCN (80 mM)    | TBAF (1.7 eq.)           | 25        | 60 min                   | 21:43:30:6   |

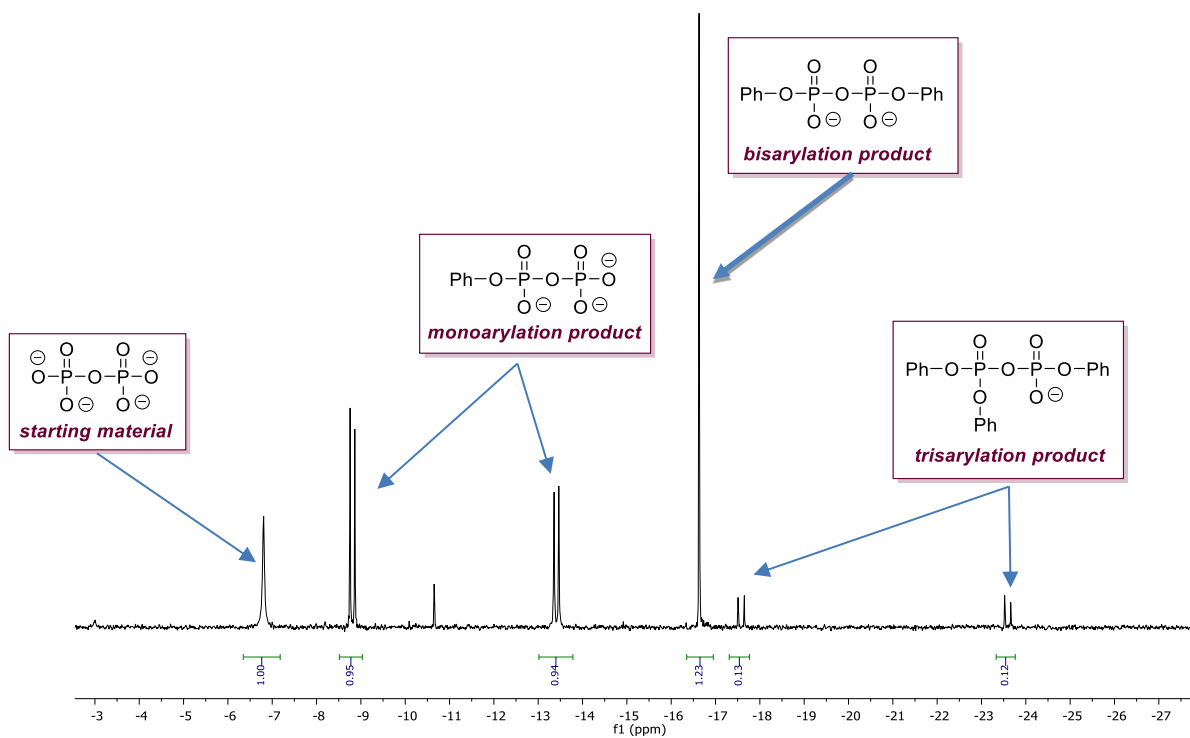

**Supporting figure 2:** exemplified  $^{31}\text{P}$ -NMR determination of starting material to product ratios during reaction optimization.

### 3. Syntheses adapted from literature

#### Synthesis of 5'-Deoxy-5'-aminoadenosine (SI-1)

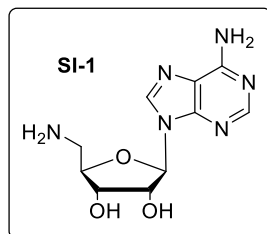

Compound **SI-1** was synthesized according to Ugarkar et al. The analytical data are in accordance with literature.<sup>1</sup>

#### Synthesis of 5'-Deoxy-5'-aminoguanosine (SI-2)

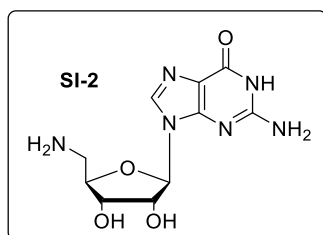

Compound **SI-2** was synthesized according to Dean. The analytical data are in accordance with literature.<sup>2</sup>

#### Synthesis of Pent-4-yn-1-ylphosphate (SI-3)

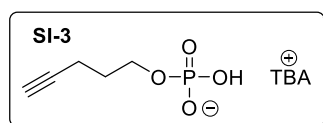

Compound **SI-3** was synthesized according to Singh et al. The analytical data are in accordance with literature.<sup>3</sup> Cations were changed to TBA as described above.



### Synthesis of (FmO)<sub>2</sub>P-N(iPr)<sub>2</sub> (SI-4)

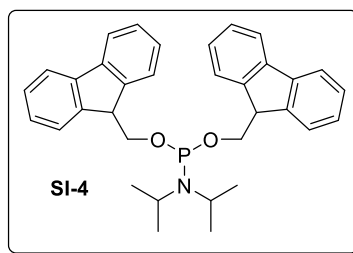

Compound **SI-4** was synthesized according to BIALY et al. The analytical data are in accordance with literature.<sup>4</sup>

### d4T-monophosphate (SI-5)

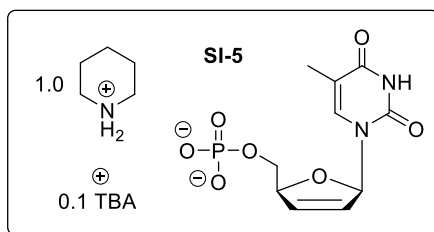

d4T (500 mg, 2.32 mmol) and ETT (725 mg, 5.58 mmol, 2.5 eq.) were dissolved in DMF. (FmO)<sub>2</sub>P-NiPr<sub>2</sub> (1.51 g, 2.90 mmol, 1.3 eq.) was added as solution in DMF (10 mL) and the resulting mixture was stirred for 1 h at rt. The solution was cooled to 0 °C and *m*CPBA (77%, 1.07 g, 4.35 mmol, 1.5 eq.) was added. The solution was stirred for 15 min at 0 °C and piperidine (10 vol%) was added. The solution was stirred for 40 min at rt. The solvent was removed under reduced pressure. The crude product was purified by RP-MPLC [C18-AQ, dryload on celite, elution with H<sub>2</sub>O/MeCN/ TEAA (10 mM)]. The product (**SI-5**, 407 mg, 804 μmol, 36%) was isolated as white solid. NMR and HRMS data were in accordance with literature.<sup>5</sup>

<sup>1</sup>H-NMR (400 MHz, D<sub>2</sub>O, δ/ppm): 7.63 (q, *J* = 1.2 Hz, 1H), 6.96 (ddd, *J* = 3.3, 1.9, 1.5 Hz, 1H), 6.49 (dt, *J* = 6.1, 1.7 Hz, 1H), 5.95 (ddd, *J* = 6.2, 2.4, 1.4 Hz, 1H), 5.13 – 5.07 (m, 1H), 4.05 (dd, *J* = 5.7, 3.2 Hz, 2H), 1.89 (d, *J* = 1.2 Hz, 3H). \* <sup>31</sup>P{<sup>1</sup>H}-NMR (162 MHz, D<sub>2</sub>O, δ/ppm): 0.41. HRMS (ESI) *m/z* for C<sub>10</sub>H<sub>12</sub>O<sub>7</sub>N<sub>2</sub>P [M-H]<sup>-</sup>: calcd. 303.0388, found 303.0388.

\*piperidinium and TBA-signals are not reported.

**Synthesis of 4,5-dimethyl-2-(trimethylsilyl)phenyl trifluoromethanesulfonate (SI-6)**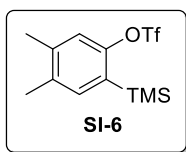

Compound **SI-6** was synthesized according to UETA et al. The analytical data matched the previously published values.<sup>6</sup>

**Synthesis of 3,6-dimethyl-2-(trimethylsilyl)phenyl trifluoromethanesulfonate (SI-7)**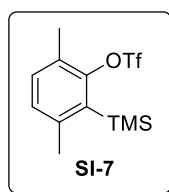

Compound **SI-7** was synthesized according to WANG et al. The analytical data matched the previously published values.<sup>7</sup>

**Synthesis of 4,5-dimethoxy-2-(trimethylsilyl)phenyl trifluoromethanesulfonate (SI-8)**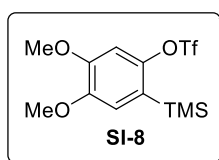

Compound **SI-8** was synthesized according to XU et al. The analytical data matched the previously published values.<sup>8</sup>

**Synthesis of 6-(trimethylsilyl)benzo[*d*][1,3]dioxol-5-yl trifluoromethanesulfonate (SI-9)**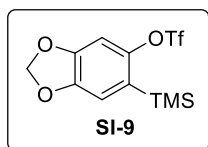

Compound **SI-9** was synthesized according to UETA et al. The analytical data matched the previously published values.<sup>6</sup>

**Synthesis of 5-chloro-2-(trimethylsilyl)phenyl trifluoromethanesulfonate (SI-10)**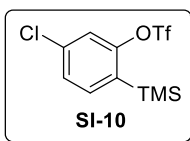

Compound **SI-10** was synthesized according to PEÑA et al. The analytical data matched the previously published values.<sup>9</sup>

**Synthesis of 4-(trifluoromethyl)-2-(trimethylsilyl)phenyl trifluoromethanesulfonate (SI-11)**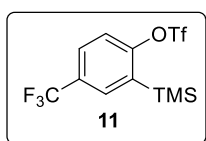

Compound **SI-11** was synthesized according to GHOTEKAR et al. The analytical data matched the previously published values.<sup>10</sup>

**Synthesis of 3-(trimethylsilyl)naphthalen-2-yl trifluoromethanesulfonate (SI-12)**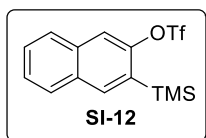

Compound **SI-12** was synthesized according to UETA et al. The analytical data matched the previously published values.<sup>6</sup>

#### 4. Cluster 1: Synthesis of (Pyro-)phosphomonoesters

##### Preliminary experiments

When cluster I reactions were performed with comparable molarity in  $P_i$  (**17**) and aryne - precursor **15** (supporting figure 3), substantial overreaction towards diphenylphosphate **52** was observed. This is underlined by the  $^{31}P\{^1H\}$ -NMR spectrum of the corresponding crude product mixture shown in supporting figure 4. The reason is a similar reactivity of  $P_i$  (**17**) and phosphomonoester **27** towards arynes. To suppress this overreaction and enable a coherent product formation, cluster I reactions were performed with an excess of  $P_i$  or  $PP_i$ .

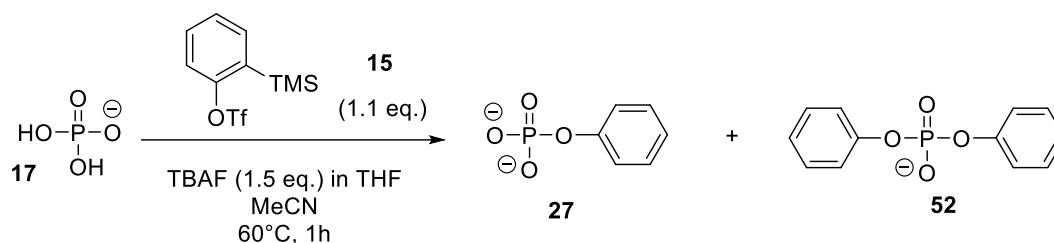

**Supporting figure 3:** reaction between  $P_i$  (**17**) and a slight excess of aryne precursor **15**.

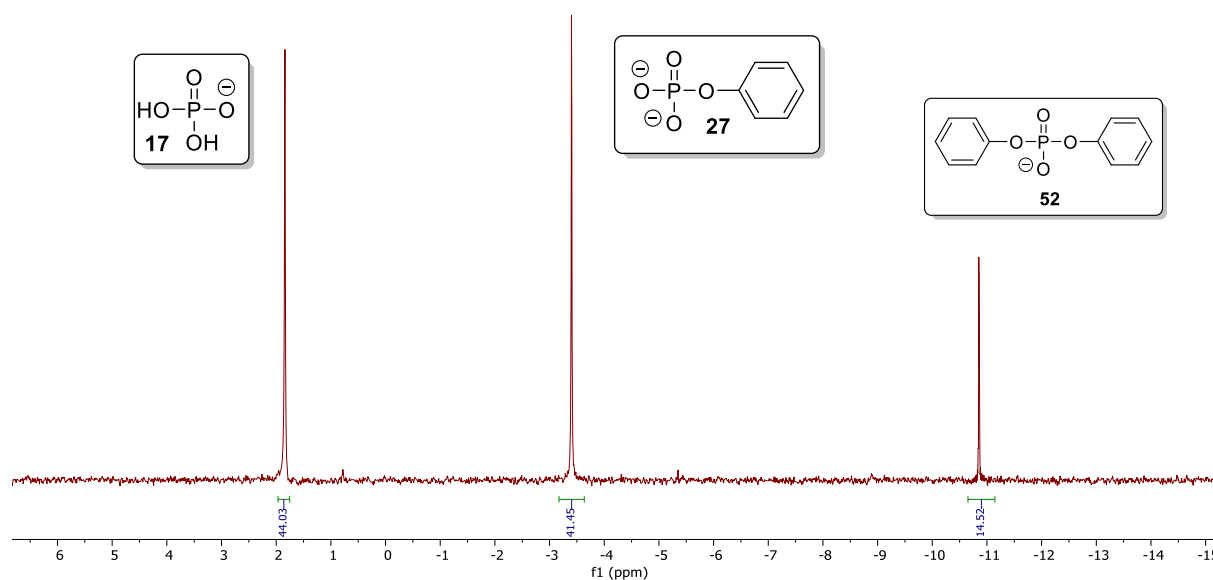

**Supporting figure 4:**  $^{31}P$ -NMR spectrum of crude product mixture from reaction conditions according to supporting figure 3. Substantial overreaction towards diester **52** is observed.

### General procedure A for the synthesis of phosphomonoesters:

The phosphate x TBA salt (900  $\mu\text{mol}$ , 3.0 eq) was dissolved in dry MeCN (67 mM) before the aryne-precursor (300  $\mu\text{mol}$ ) was added. Subsequently the mixture was heated to 60 °C and TBAF (1 M in THF, 1.1 eq.) was added dropwise via syringe pump (1 h, 60°C, needle tip is below solvent surface). After removing the oil bath, the reaction mixture was cooled to rt and was then directly applied to a silica column (h = 6 cm, d = 2 cm, preconditioned with acetone). The column was washed with acetone (200 mL) and the product was eluted with acetone / AcOH (9/1, 50 mL). The solvent was removed, and the crude product was further purified by RP-MPLC [C18AQ, H<sub>2</sub>O/MeCN/TEAA (10 mM)]. The product containing fractions were identified by LC-MS and the products were isolated after lyophilization.

### Synthesis of phenyl phosphate (27)

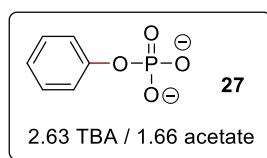

The compound was synthesized according to the general procedure A from phosphate x 1.05 TBA (**17**, 316 mg, 900  $\mu\text{mol}$ , 3.0 eq) and 2-(trimethylsilyl)phenyl trifluoromethanesulfonate (**1**, 90 mg, 300  $\mu\text{mol}$ ). The product (**27**, 241 mg, 265  $\mu\text{mol}$ , 88%) was isolated as a colorless oil.

**<sup>1</sup>H-NMR** (400 MHz, D<sub>2</sub>O,  $\delta$ /ppm): 7.48 – 7.32 (m, 2H), 7.26 – 7.11 (m, 3H), 3.22 – 3.14 (m, 21H), 1.63 (ddd,  $J = 12.0, 10.0, 6.2$  Hz, 21H), 1.35 (h,  $J = 7.4$  Hz, 21H), 0.94 (t,  $J = 7.4$  Hz, 32H). **<sup>13</sup>C{<sup>1</sup>H}-NMR** (101 MHz, D<sub>2</sub>O,  $\delta$ /ppm): 152.22 (d,  $J = 6.6$  Hz), 129.64, 123.91, 120.45 (d,  $J = 4.3$  Hz), 58.13 – 58.01 (m), 23.10, 19.12, 12.80. **<sup>31</sup>P{<sup>1</sup>H}-NMR** (162 MHz, D<sub>2</sub>O,  $\delta$ /ppm): -3.53. **HRMS** (ESI)  $m/z$  for C<sub>6</sub>H<sub>6</sub>O<sub>4</sub>P [M-H]<sup>-</sup>: calcd. 173.0009, found 173.0010.

### Synthesis of 2-naphthalen-2-yl phosphate (28)

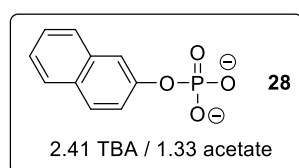

The compound was synthesized according to the general procedure A from phosphate x 1.05 TBA (**17**, 316 mg, 900  $\mu\text{mol}$ , 3.0 eq) and 3-(trimethylsilyl)naphthalen-2-yl

trifluoromethanesulfonate (**SI-12**, 105 mg, 300  $\mu\text{mol}$ ). The product (**28**, 173 mg, 195  $\mu\text{mol}$ , 65%) was isolated as a colorless oil.

$^1\text{H-NMR}$  (400 MHz,  $\text{D}_2\text{O}$ ,  $\delta/\text{ppm}$ ): 7.95 – 7.73 (m, 3H), 7.67 (t,  $J = 2.1$  Hz, 1H), 7.60 – 7.33 (m, 3H), 3.12 – 2.89 (m, 19H), 1.66 – 1.44 (m, 19H), 1.29 (h,  $J = 7.4$  Hz, 19H), 0.91 (t,  $J = 7.4$  Hz, 29H).  $^{13}\text{C}\{^1\text{H}\}\text{-NMR}$  (101 MHz,  $\text{D}_2\text{O}$ ,  $\delta/\text{ppm}$ ): 150.43 (d,  $J = 6.8$  Hz), 133.88, 129.97, 129.45, 127.71, 127.32, 126.71, 125.09, 121.55 (d,  $J = 4.6$  Hz), 116.11 (d,  $J = 4.6$  Hz), 62.59 – 45.12 (m), 23.02, 19.08, 12.82.  $^{31}\text{P}\{^1\text{H}\}\text{-NMR}$  (162 MHz,  $\text{D}_2\text{O}$ ,  $\delta/\text{ppm}$ ): -3.43. **HRMS** (APCI)  $m/z$  for  $\text{C}_{10}\text{H}_8\text{O}_4\text{P}$   $[\text{M-H}]^-$ : calcd. 223.0166, found 223.0166.

### Synthesis of 3,4-dimethylphenyl phosphate (**29**)

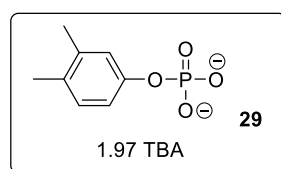

The compound was synthesized according to the general procedure A from phosphate x 1.05 TBA (**17**, 316 mg, 900  $\mu\text{mol}$ , 3.0 eq) and 4,5-dimethyl-2-(trimethylsilyl)phenyl trifluoromethanesulfonate (**SI-6**, 98 mg, 300  $\mu\text{mol}$ ). The product (**29**, 204 mg, 277  $\mu\text{mol}$ , 92%) was isolated as a colorless oil.

$^1\text{H-NMR}$  (400 MHz,  $\text{D}_2\text{O}$ ,  $\delta/\text{ppm}$ ): 7.17 – 7.10 (m, 1H), 7.01 (ddd,  $J = 2.4, 1.1, 0.5$  Hz, 1H), 6.93 (dddd,  $J = 8.3, 2.6, 1.3, 0.6$  Hz, 1H), 3.19 – 3.07 (m, 16H), 2.23 (s, 3H), 2.20 (s, 3H), 1.74 – 1.47 (m, 16H), 1.34 (h,  $J = 7.4$  Hz, 16H), 1.07 – 0.78 (m, 24H).  $^{13}\text{C}\{^1\text{H}\}\text{-NMR}$  (101 MHz,  $\text{D}_2\text{O}$ ,  $\delta/\text{ppm}$ ): 150.19 (d,  $J = 6.8$  Hz), 138.26, 132.23 (d,  $J = 1.3$  Hz), 130.25, 121.46 (d,  $J = 4.3$  Hz), 117.54 (d,  $J = 4.2$  Hz), 64.51 – 53.21 (m), 23.08, 19.17 – 19.07 (m), 19.01, 18.13, 12.83.  $^{31}\text{P}\{^1\text{H}\}\text{-NMR}$  (162 MHz,  $\text{D}_2\text{O}$ ,  $\delta/\text{ppm}$ ): -3.68. **HRMS** (APCI)  $m/z$  for  $\text{C}_8\text{H}_{10}\text{O}_4\text{P}$   $[\text{M-H}]^-$ : calcd. 201.0322, found 201.0323.

### Synthesis of 1H-indol-5-yl phosphate (**30**)

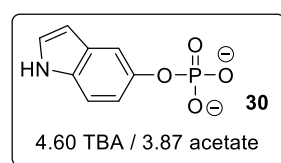

The compound was synthesized according to the general procedure A from phosphate x 1.05 TBA (**17**, 316 mg, 900  $\mu\text{mol}$ , 3.0 eq) and 4-(trimethylsilyl)-1H-indol-5-yl

trifluoromethanesulfonate (101 mg, 300  $\mu\text{mol}$ ). The crude product was obtained as a 81:19 mixture (5-**30**:4-**30**). The product (**30**, 190 mg, 122  $\mu\text{mol}$ , 41%) was isolated as a 96:4 mixture (5-**30**:4-**30**) as a light green solid. The NMR data are given for the major isomer.

**$^1\text{H}$ -NMR** (400 MHz,  $\text{D}_2\text{O}$ ,  $\delta/\text{ppm}$ ): 7.48 – 7.43 (m, 3H), 7.40 (s, 1H), 7.09 – 7.04 (m, 1H), 3.28 – 2.98 (m, 37H), 1.80 – 1.51 (m, 37H), 1.34 (h,  $J = 7.4$  Hz, 37H), 0.94 (t,  $J = 7.4$  Hz, 55H).  **$^{13}\text{C}\{^1\text{H}\}$ -NMR** (101 MHz,  $\text{D}_2\text{O}$ ,  $\delta/\text{ppm}$ ): 145.54 (d,  $J = 7.0$  Hz), 132.73, 127.62, 126.69, 115.62 (d,  $J = 3.8$  Hz), 111.97, 110.97 (d,  $J = 4.1$  Hz), 100.98, 60.10 – 56.30 (m), 23.07, 19.10, 12.80.  **$^{31}\text{P}\{^1\text{H}\}$ -NMR** (122 MHz,  $\text{D}_2\text{O}$ ,  $\delta/\text{ppm}$ ): -3.28, -3.59. **HRMS** (ESI)  $m/z$  for  $\text{C}_8\text{H}_7\text{O}_4\text{NP}$  [ $\text{M-H}$ ] $^-$ : calcd. 212.0118, found 212.0118.

### Synthesis of pyren-2-yl phosphate (**31**)

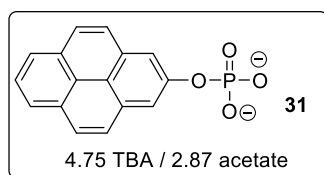

The compound was synthesized according to the general procedure A from phosphate x 1.05 TBA (**17**, 316 mg, 900  $\mu\text{mol}$ , 3.0 eq) and 2-(trimethylsilyl)pyren-1-yl trifluoromethanesulfonate (**SI-19**, 127 mg, 300  $\mu\text{mol}$ ). The crude product was obtained as a 76:24 mixture (2-**31**:1-**31**). The product (**31**, 334 mg, 214  $\mu\text{mol}$ , 71%) was isolated as a 62:38 mixture (2-**31**:1-**31**) as a light green oil. The  $^1\text{H}$  NMR and  $^{31}\text{P}$  NMR data are given for the mixture and the  $^{13}\text{C}$  NMR data are given for the major isomer.

**$^1\text{H}$ -NMR** (400 MHz,  $\text{CD}_3\text{CN}$ ,  $\delta/\text{ppm}$ ): 8.53 (d,  $J = 9.2$  Hz, 0.6H), 8.29 (dd,  $J = 8.5, 1.0$  Hz, 0.6H), 8.20 – 8.13 (m, 4H), 8.13 (dd,  $J = 7.6, 1.2$  Hz, 0.6H), 8.10 – 8.03 (m, 1.3H), 8.00 (s, 4H), 7.99 – 7.90 (m, 3.6H), 3.17 – 2.82 (m, 38H), 1.66 – 1.48 (m, 38H), 1.38 – 1.17 (m, 38H), 0.93 (t,  $J = 7.3$  Hz, 57H).  **$^{13}\text{C}\{^1\text{H}\}$ -NMR** (101 MHz,  $\text{CD}_3\text{CN}$ ,  $\delta/\text{ppm}$ ): 153.51 (d,  $J = 7.1$  Hz), 133.12, 131.35, 128.57, 127.97, 126.29, 126.03, 117.74 (d,  $J = 5.1$  Hz), 62.39 – 57.17 (m), 24.16, 22.20 – 18.70 (m), 13.70.  **$^{31}\text{P}\{^1\text{H}\}$ -NMR** (122 MHz,  $\text{CD}_3\text{CN}$ ,  $\delta/\text{ppm}$ ): -3.31, -3.75. **HRMS** (ESI)  $m/z$  for  $\text{C}_{16}\text{H}_{10}\text{O}_4\text{P}$  [ $\text{M-H}$ ] $^-$ : calcd. 297.0322, found 297.0320.

**Deuteration experiment using deuterated P<sub>i</sub> (17-D)**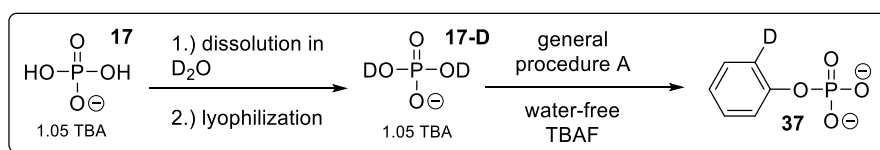

P<sub>i</sub> x 1.05 TBA (500 mg) was dissolved in D<sub>2</sub>O (3.0 ml) and the resulting solution was incubated for 30 min at room temperature. Subsequently the solution was lyophilized to dryness. The resulting solid was applied as starting material in general procedure A. In this case, the TBAF-solution was stored over molecular sieves (3 Å) for 5 h before the reaction to reduce the water content. The deuteration ratio of the product was determined by HRMS.

**HRMS** (ESI) m/z for C<sub>6</sub>H<sub>5</sub><sup>2</sup>HO<sub>4</sub>P [M-H]<sup>-</sup>: calcd. 174.0072, found 174.0072.



### General procedure B for the synthesis of pyrophosphomonoesters:

The pyrophosphate x TBA salt (1.50 mmol, 5.0 eq) was dissolved in dry MeCN (67 mM) before the aryne-precursor (300  $\mu$ mol) was added. Subsequently TBAF (1 M in THF, 1.1 eq.) was added dropwise via syringe pump (1 h, rt, needle tip is below solvent surface). The reaction mixture was stirred 15 min at rt and was then diluted with Et<sub>2</sub>O (15 mL) and H<sub>2</sub>O (15 mL) and transferred to a separation funnel. The layers were separated, and the aqueous layer was washed with Et<sub>2</sub>O (2  $\times$  10 mL). Then, the combined organic layers were back-extracted with H<sub>2</sub>O (5  $\times$  10 mL) and the combined aqueous layers were lyophilized. The residue was further purified by RP-MPLC [C18AQ, H<sub>2</sub>O/MeCN/TEAA (10 mM)]. The product containing fractions were identified by LC-MS and the products were isolated after lyophilization.

### Synthesis of phenyl diphosphate (32)

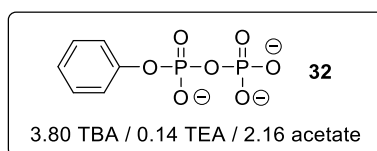

The compound was synthesized according to the general procedure B from pyrophosphate x 2.39 TBA (**18**, 1.13 g, 1.50 mmol, 5.0 eq) and 2-(trimethylsilyl)phenyl trifluoromethanesulfonate (**1**, 90 mg, 300  $\mu$ mol). The product (**32**, 358 mg, 272  $\mu$ mol, 91%) was isolated as a colorless oil.

**<sup>1</sup>H-NMR** (400 MHz, D<sub>2</sub>O,  $\delta$ /ppm): 7.50 – 7.36 (m, 2H), 7.32 – 7.15 (m, 3H), 3.51 – 2.96 (m, 27H), 1.98 (s, 5H), 1.81 – 1.57 (m, 31H), 1.37 (h,  $J = 7.7$  Hz, 31H), 1.30 – 1.25 (m, 1H), 0.96 (t,  $J = 7.3$  Hz, 46H). **<sup>13</sup>C{<sup>1</sup>H}-NMR** (101 MHz, D<sub>2</sub>O,  $\delta$ /ppm): 151.84 (d,  $J = 7.2$  Hz), 129.64, 124.25 (d,  $J = 1.3$  Hz), 120.60 (d,  $J = 4.4$  Hz), 59.88 – 54.25 (m), 46.61, 23.10, 20.81 – 17.49 (m), 12.80, 8.20. **<sup>31</sup>P{<sup>1</sup>H}-NMR** (122 MHz, D<sub>2</sub>O,  $\delta$ /ppm): -10.90 (d,  $J = 20.6$  Hz), -15.80 (d,  $J = 20.7$  Hz). **HRMS** (ESI)  $m/z$  for C<sub>6</sub>H<sub>7</sub>O<sub>7</sub>P<sub>2</sub> [M-H]<sup>-</sup>: calcd. 252.9672, found 252.9675.

### Synthesis of 2-naphthalen-2-yl diphosphate (**33**)

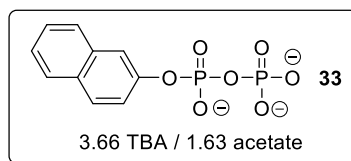

The compound was synthesized according to the general procedure B from pyrophosphate x 2.30 TBA (**18**, 1.10 g, 1.50 mmol, 5.0 eq) and 3-(trimethylsilyl)naphthalen-2-yl trifluoromethanesulfonate (**SI-12**, 105 mg, 300  $\mu$ mol). The product (**33**, 239 mg, 186  $\mu$ mol, 62%) was isolated as a colorless oil.

**$^1\text{H-NMR}$**  (400 MHz,  $\text{D}_2\text{O}$ ,  $\delta/\text{ppm}$ ): 8.03 – 7.90 (m, 3H), 7.75 (t,  $J = 2.1$  Hz, 1H), 7.66 – 7.39 (m, 3H), 3.34 – 2.82 (m, 29H), 1.73 – 1.45 (m, 29H), 1.32 (h,  $J = 7.4$  Hz, 29H), 0.92 (t,  $J = 7.4$  Hz, 44H).  **$^{13}\text{C}\{^1\text{H}\}\text{-NMR}$**  (101 MHz,  $\text{D}_2\text{O}$ ,  $\delta/\text{ppm}$ ): 149.86 (d,  $J = 7.3$  Hz), 133.81, 130.21, 129.52, 127.73, 127.49, 126.76, 125.31, 121.47 (d,  $J = 4.7$  Hz), 116.54 (d,  $J = 4.7$  Hz), 59.80 – 53.72 (m), 23.05, 19.10 (t,  $J = 1.6$  Hz), 12.82.  **$^{31}\text{P}\{^1\text{H}\}\text{-NMR}$**  (122 MHz,  $\text{D}_2\text{O}$ ,  $\delta/\text{ppm}$ ): -10.84 (d,  $J = 20.7$  Hz), -15.94 (d,  $J = 20.7$  Hz). **HRMS** (ESI)  $m/z$  for  $\text{C}_{10}\text{H}_9\text{O}_7\text{P}_2$  [M-H] $^-$ : calcd. 302.9829, found 302.9830.

### Synthesis of 3,4-dimethylphenyl diphosphate (**34**)

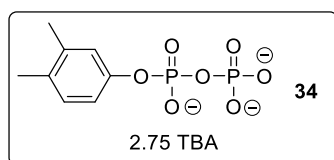

The compound was synthesized according to the general procedure B from pyrophosphate x 2.39 TBA (**18**, 1.13 g, 1.50 mmol, 5.0 eq) and 4,5-dimethyl-2-(trimethylsilyl)phenyl trifluoromethanesulfonate (**SI-6**, 98 mg, 300  $\mu$ mol). The product (**34**, 281 mg, 281  $\mu$ mol, 94%) was isolated as a colorless oil.

**$^1\text{H-NMR}$**  (400 MHz,  $\text{D}_2\text{O}$ ,  $\delta/\text{ppm}$ ): 7.19 – 7.13 (m, 1H), 7.07 (ddd,  $J = 2.5, 1.5, 0.9$  Hz, 1H), 6.99 (dddd,  $J = 8.3, 2.7, 1.2, 0.6$  Hz, 1H), 3.31 – 3.04 (m, 22H), 2.25 (s, 3H), 2.22 (s, 3H), 1.75 – 1.51 (m, 22H), 1.35 (h,  $J = 7.4$  Hz, 22H), 1.08 – 0.72 (m, 33H).  **$^{13}\text{C}\{^1\text{H}\}\text{-NMR}$**  (101 MHz,  $\text{D}_2\text{O}$ ,  $\delta/\text{ppm}$ ): 149.84 (d,  $J = 7.2$  Hz), 138.31, 132.59 (d,  $J = 1.4$  Hz), 130.24, 121.56 (d,  $J = 4.5$  Hz), 117.66 (d,  $J = 4.3$  Hz), 59.22 – 56.56 (m), 23.09, 19.12 (t,  $J = 1.6$  Hz), 18.99, 18.15, 12.83.  **$^{31}\text{P}\{^1\text{H}\}\text{-NMR}$**  (162 MHz,  $\text{D}_2\text{O}$ ,  $\delta/\text{ppm}$ ): -10.90 (d,  $J = 20.5$  Hz), -15.72 (d,  $J = 21.1$  Hz). **HRMS** (ESI)  $m/z$  for  $\text{C}_8\text{H}_{11}\text{O}_7\text{P}_2$  [M-H] $^-$ : calcd. 280.9985, found 280.9987.

### Synthesis of 1*H*-indol-5-yl diphosphate (**35**)

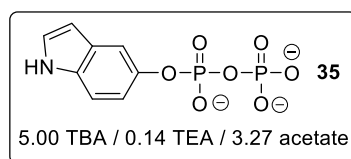

The compound was synthesized according to the general procedure B from pyrophosphate x 2.30 TBA (**18**, 1.10 g, 1.50 mmol, 5.0 eq) and 4-(trimethylsilyl)-1*H*-indol-5-yl trifluoromethanesulfonate (101 mg, 300  $\mu$ mol). The crude product was obtained as a 88:12 mixture (5-**35**:4-**35**). The product (**35**, 216 mg, 126  $\mu$ mol, 42%) was isolated as a 96:4 mixture (5-**35**:4-**35**) as a light green oil. The NMR data are given for the major isomer.

**$^1\text{H-NMR}$**  (300 MHz,  $\text{D}_2\text{O}$ ,  $\delta/\text{ppm}$ ): 7.51 (ddd,  $J = 2.3, 1.6, 0.6$  Hz, 1H), 7.50 – 7.45 (m, 1H), 7.45 – 7.39 (m, 1H), 7.14 (dddd,  $J = 8.8, 2.4, 1.2, 0.4$  Hz, 1H), 6.58 (dd,  $J = 3.1, 0.9$  Hz, 1H), 3.30 – 2.89 (m, 41H), 1.63 (dq,  $J = 11.7, 7.7$  Hz, 40H), 1.36 (h,  $J = 7.4$  Hz, 40H), 1.26 (t,  $J = 7.3$  Hz, 1H), 0.95 (t,  $J = 7.3$  Hz, 60H).  **$^{13}\text{C}\{^1\text{H}\}\text{-NMR}$**  (101 MHz,  $\text{D}_2\text{O}$ ,  $\delta/\text{ppm}$ ): 145.44 (d,  $J = 7.4$  Hz), 132.80, 127.58, 126.62, 115.72 (d,  $J = 3.9$  Hz), 111.92, 111.18 (d,  $J = 4.3$  Hz), 101.30, 59.29 – 55.57 (m), 23.07, 19.11 (t,  $J = 1.5$  Hz), 12.82.  **$^{31}\text{P}\{^1\text{H}\}\text{-NMR}$**  (162 MHz,  $\text{D}_2\text{O}$ ,  $\delta/\text{ppm}$ ): -10.74 (d,  $J = 20.5$  Hz), -15.01 (d,  $J = 20.4$  Hz). **HRMS** (ESI)  $m/z$  for  $\text{C}_8\text{H}_7^2\text{HO}_7\text{P}_2$  [ $\text{M-H}$ ] $^-$ : calcd. 292.9844, found 292.9845.

### Synthesis of pyren-2-yl diphosphate (**36**)

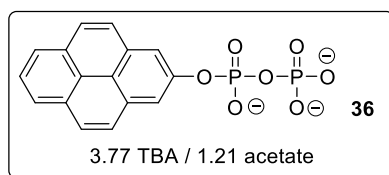

The compound was synthesized according to the general procedure B from pyrophosphate x 2.39 TBA (**18**, 1.13 g, 1.50 mmol, 5.0 eq) and 2-(trimethylsilyl)pyren-1-yl trifluoromethanesulfonate (**SI-19**, 127 mg, 300  $\mu$ mol). The crude product was obtained as a 86:14 mixture (2-**36**:1-**36**). The product (**36**, 379 mg, 278  $\mu$ mol, 93%) was isolated as an 82:18 mixture (2-**36**:1-**36**) as a light green oil. The NMR data are given for the major isomer.

**$^1\text{H-NMR}$**  (400 MHz,  $\text{D}_2\text{O}$ ,  $\delta/\text{ppm}$ ): 8.17 – 8.13 (m, 2H), 8.07 (d,  $J = 9.1$  Hz, 2H), 7.91 (t,  $J = 8.8$  Hz, 4H), 7.71 (t,  $J = 7.6$  Hz, 1H), 2.81 – 2.58 (m, 30H), 1.52 – 1.22 (m, 30H), 1.14 (h,  $J = 7.3$  Hz, 30H), 0.81 (t,  $J = 7.3$  Hz, 45H).  **$^{13}\text{C}\{^1\text{H}\}\text{-NMR}$**  (101 MHz,  $\text{D}_2\text{O}$ ,  $\delta/\text{ppm}$ ): 150.68 (d,  $J = 6.8$  Hz), 132.08, 130.20, 127.85, 127.46, 125.76, 125.27, 123.82, 120.80, 117.11 (d,  $J = 4.9$  Hz),

57.68 (t,  $J = 2.8$  Hz), 22.83, 18.96, 12.80.  $^{31}\text{P}\{^1\text{H}\}$ -NMR (162 MHz,  $\text{D}_2\text{O}$ ,  $\delta/\text{ppm}$ ): -10.63 (d,  $J = 19.4$  Hz), -16.18 (d,  $J = 19.9$  Hz). HRMS (ESI)  $m/z$  for  $\text{C}_{16}\text{H}_{11}\text{O}_7\text{P}_2$   $[\text{M}-\text{H}]^-$ : calcd. 376.9985, found 376.9987.

## 5. Cluster 2A: Synthesis of (Pyro-)phosphodiesters (aryne-Scope)

### General procedure C for the synthesis of phosphodiesters:

The phosphate x TBA salt (150 - 500  $\mu\text{mol}$ ) was dissolved in dry MeCN (200 mL) before the aryne-precursor (2.5 eq.) was added. Subsequently TBAF (1 M in THF, 2.5 eq.) was added dropwise via syringe pump (1 h, rt, needle tip is below solvent surface). Subsequently the reaction mixture is stirred for 15 min at rt and directly applied to a silica column (h = 6 cm, d = 2 cm, preconditioned with acetone). The column was washed with acetone (200 mL) and the product was eluted with acetone / AcOH (9/1, 50 mL). The solvent was removed, and the crude product was further purified by RP-MPLC [C18AQ,  $\text{H}_2\text{O}/\text{MeCN}/\text{TEAA}$  (10 mM)]. The product containing fractions were identified by LC-MS and the products were isolated after lyophilization.

### 5,5,5-Trifluoropentyl-phenylphosphate (40)

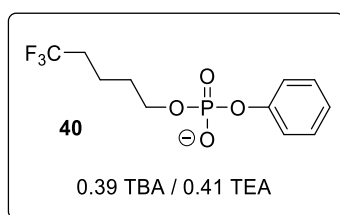

The compound was synthesized according to the general procedure C from 5,5,5-trifluoropentylphosphate x 1.5 TBA (**38**, 173 mg, 300  $\mu\text{mol}$ ) and 2-(trimethylsilyl)phenyl trifluoromethanesulfonate (**1**, 182  $\mu\text{l}$ , 223 mg, 750  $\mu\text{mol}$ , 2.5 eq.). The product (**40**, 66.0 mg, 152  $\mu\text{mol}$ , 51%) was isolated as colorless oil.

$^1\text{H}$ -NMR (400 MHz,  $\text{CD}_3\text{CN}$ ,  $\delta/\text{ppm}$ ): 7.32 – 7.24 (m, 2H), 7.22 – 7.16 (m, 2H), 7.08 – 7.01 (m, 1H), 3.91 (dt,  $J = 6.8, 6.0$  Hz, 2H), 3.13 – 3.04 (m, 3H), 2.95 (q,  $J = 7.3$  Hz, 2H), 2.21 – 2.07 (m, 2H), 1.69 – 1.52 (m, 7H), 1.40 – 1.29 (m, 3H), 1.19 (t,  $J = 7.3$  Hz, 4H), 0.96 (t,  $J = 7.4$  Hz, 4H).  $^{13}\text{C}\{^1\text{H}\}$ -NMR (101 MHz,  $\text{CD}_3\text{CN}$ ,  $\delta/\text{ppm}$ ): 154.36 (d,  $J = 6.5$  Hz), 130.12, 123.82, 121.14 (d,  $J = 5.0$  Hz), 65.94 (d,  $J = 6.1$  Hz), 59.31, 46.53, 33.58 (q,  $J = 28.0$  Hz), 30.25 (d,  $J = 7.5$

Hz), 24.31, 20.34, 19.24 (q,  $J = 3.3$  Hz), 13.79, 8.88.  $^{19}\text{F}$  NMR (377 MHz,  $\text{CD}_3\text{CN}$ ,  $\delta/\text{ppm}$ ): -66.98 (t,  $J = 11.4$  Hz).  $^{31}\text{P}\{^1\text{H}\}$ -NMR (162 MHz,  $\text{CD}_3\text{CN}$ ,  $\delta/\text{ppm}$ ): -6.72. HRMS (ESI)  $m/z$  for  $\text{C}_{11}\text{H}_{13}\text{F}_3\text{O}_4\text{P}$  [M-H]: calcd. 297.0509, found 297.0507.

### Synthesis of 3,4-dimethylphenyl (5,5,5-trifluoropentyl) phosphate (41)

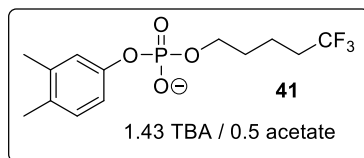

The compound was synthesized according to the general procedure C from 5,5,5-trifluoropentyl phosphate x 1.22 TBA (**38**, 155 mg, 300  $\mu\text{mol}$ ) and 4,5-dimethyl-2-(trimethylsilyl)phenyl trifluoromethanesulfonate (**SI-6**, 245 mg, 750  $\mu\text{mol}$ , 2.5 eq). The product (**41**, 142 mg, 201  $\mu\text{mol}$ , 67%) was isolated as a colorless oil.

$^1\text{H}$ -NMR (400 MHz,  $\text{CD}_3\text{CN}$ ,  $\delta/\text{ppm}$ ): 7.00 – 6.94 (m, 2H), 6.93 – 6.85 (m, 1H), 3.93 – 3.72 (m, 2H), 3.23 – 2.93 (m, 11H), 2.19 (s, 3H), 2.16 (s, 3H), 2.16 – 2.06 (m, 2H), 1.69 – 1.49 (m, 15H), 1.34 (h,  $J = 7.4$  Hz, 11H), 0.96 (t,  $J = 7.3$  Hz, 17H).  $^{13}\text{C}\{^1\text{H}\}$ -NMR (101 MHz,  $\text{CD}_3\text{CN}$ ,  $\delta/\text{ppm}$ ): 153.58 (d,  $J = 6.6$  Hz), 137.71, 130.47, 130.35, 128.74 (q,  $J = 275.5$  Hz), 122.10 (d,  $J = 4.7$  Hz), 118.16, 64.85 (d,  $J = 6.1$  Hz), 60.82 – 54.61 (m), 33.58 (q,  $J = 27.9$  Hz), 30.47 (d,  $J = 7.3$  Hz), 24.26, 21.63 – 19.39 (m), 19.90, 19.36 (q,  $J = 3.1$  Hz), 18.90, 13.74.  $^{19}\text{F}$  NMR (377 MHz,  $\text{CD}_3\text{CN}$ ,  $\delta/\text{ppm}$ ): -66.97 (t,  $J = 11.1$  Hz).  $^{31}\text{P}\{^1\text{H}\}$ -NMR (162 MHz,  $\text{CD}_3\text{CN}$ ,  $\delta/\text{ppm}$ ): -5.40. HRMS (ESI)  $m/z$  for  $\text{C}_{13}\text{H}_{17}\text{F}_3\text{O}_4\text{P}$  [M-H]: calcd. 325.0822, found 325.0820.

### Synthesis of 2,5-dimethylphenyl (5,5,5-trifluoropentyl) phosphate (42)

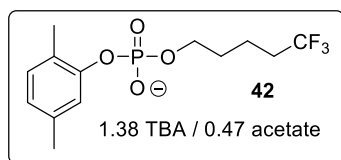

The compound was synthesized according to the general procedure C from 5,5,5-trifluoropentyl phosphate x 1.47 TBA (**38**, 173 mg, 300  $\mu\text{mol}$ ) and 3,6-dimethyl-2-(trimethylsilyl)phenyl trifluoromethanesulfonate (**SI-7**, 245 mg, 750  $\mu\text{mol}$ , 2.5 eq). The product (**42**, 124 mg, 180  $\mu\text{mol}$ , 60%) was isolated as a colorless oil.

$^1\text{H}$ -NMR (400 MHz,  $\text{CD}_3\text{CN}$ ,  $\delta/\text{ppm}$ ): 7.22 (s, 1H), 6.96 (d,  $J = 7.5$  Hz, 1H), 6.70 – 6.59 (m, 1H), 4.03 – 3.56 (m, 2H), 3.15 – 3.04 (m, 11H), 2.23 (d,  $J = 0.7$  Hz, 3H), 2.22 – 2.07 (m, 5H),

1.71 – 1.48 (m, 15H), 1.44 – 1.16 (m, 11H), 0.96 (t,  $J = 7.3$  Hz, 17H).  $^{13}\text{C}\{^1\text{H}\}$ -NMR (101 MHz,  $\text{CD}_3\text{CN}$ ,  $\delta/\text{ppm}$ ): 153.71 (d,  $J = 6.7$  Hz), 136.61, 130.74, 130.13 (q), 126.44 (d,  $J = 6.4$  Hz), 123.03, 121.45 (d,  $J = 2.5$  Hz), 64.93 (d,  $J = 6.3$  Hz), 60.62 – 54.40 (m), 33.62 (q,  $J = 27.9$  Hz), 30.53 (d,  $J = 7.3$  Hz), 24.25, 21.15, 20.64 – 19.62 (m), 19.41 (q,  $J = 3.2$  Hz), 16.51, 13.74.  $^{19}\text{F}$  NMR (377 MHz,  $\text{CD}_3\text{CN}$ ,  $\delta/\text{ppm}$ ): -66.95 (t,  $J = 11.4$  Hz).  $^{31}\text{P}\{^1\text{H}\}$ -NMR (162 MHz,  $\text{CD}_3\text{CN}$ ,  $\delta/\text{ppm}$ ): -5.26. HRMS (ESI)  $m/z$  for  $\text{C}_{13}\text{H}_{17}\text{F}_3\text{O}_4\text{P}$   $[\text{M}-\text{H}]^-$ : calcd. 325.0822, found 325.0821.

### Synthesis of 3,4-dimethoxyphenyl (5,5,5-trifluoropentyl) phosphate (**43**)

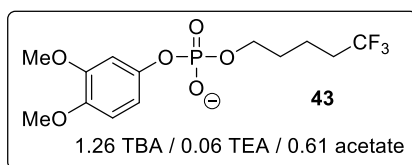

The compound was synthesized according to the general procedure C from 5,5,5-trifluoropentyl phosphate x 1.22 TBA (**38**, 155 mg, 300  $\mu\text{mol}$ ) and 4,5-dimethoxy-2-(trimethylsilyl)phenyl trifluoromethanesulfonate (**SI-8**, 269 mg, 750  $\mu\text{mol}$ , 2.5 eq). The product (**43**, 121 mg, 172  $\mu\text{mol}$ , 57%) was isolated as a colorless oil.

$^1\text{H}$ -NMR (400 MHz,  $\text{CD}_3\text{CN}$ ,  $\delta/\text{ppm}$ ): 6.87 (dd,  $J = 2.6, 0.9$  Hz, 1H), 6.77 (d,  $J = 8.7$  Hz, 1H), 6.70 (ddd,  $J = 8.7, 2.6, 1.1$  Hz, 1H), 3.84 – 3.76 (m, 2H), 3.75 (s, 3H), 3.73 (s, 3H), 3.13 – 3.01 (m, 11H), 2.26 – 2.05 (m, 2H), 1.68 – 1.48 (m, 15H), 1.44 – 1.24 (m, 11H), 0.96 (t,  $J = 7.4$  Hz, 15H), 0.89 (t,  $J = 7.2$  Hz, 0.5H).  $^{13}\text{C}\{^1\text{H}\}$ -NMR (101 MHz,  $\text{CD}_3\text{CN}$ ,  $\delta/\text{ppm}$ ): 150.26, 149.80 (d,  $J = 6.5$  Hz), 145.07, 128.74 (q,  $J = 275.6$  Hz), 113.15, 111.93 (d,  $J = 4.7$  Hz), 106.22 (d,  $J = 4.9$  Hz), 64.95 (d,  $J = 6.3$  Hz), 61.17 – 57.30 (m), 56.80, 56.16, 33.59 (q,  $J = 27.9$  Hz), 30.48 (d,  $J = 7.3$  Hz), 24.25, 21.75 – 19.05 (m), 19.36 (q,  $J = 3.2$  Hz), 13.73.  $^{19}\text{F}$  NMR (377 MHz,  $\text{CD}_3\text{CN}$ ,  $\delta/\text{ppm}$ ): -66.95 (t,  $J = 11.4$  Hz).  $^{31}\text{P}\{^1\text{H}\}$ -NMR (162 MHz,  $\text{CD}_3\text{CN}$ ,  $\delta/\text{ppm}$ ): -5.36. HRMS (ESI)  $m/z$  for  $\text{C}_{13}\text{H}_{17}\text{F}_3\text{O}_6\text{P}$   $[\text{M}-\text{H}]^-$ : calcd. 357.0720, found 357.0721.

### Synthesis of 4-(trifluoromethyl)phenyl (5,5,5-trifluoropentyl) phosphate (**44**)

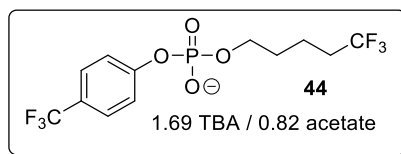

The compound was synthesized according to the general procedure C from 5,5,5-trifluoropentyl phosphate x 1.22 TBA (**38**, 155 mg, 300  $\mu$ mol) and 5-(trifluoromethyl)-2-(trimethylsilyl)phenyl trifluoromethanesulfonate (**SI-11**, 275 mg, 750  $\mu$ mol, 2.5 eq). The crude product was obtained as a 68:32 mixture (*para:meta*). The product (**44**, 116 mg, 149  $\mu$ mol, 50%) was isolated as a 85:15 mixture (*para:meta*) as a colorless oil. The NMR data are given for the major isomer.

**$^1\text{H-NMR}$**  (400 MHz,  $\text{CD}_3\text{CN}$ ,  $\delta/\text{ppm}$ ): 7.60 – 7.52 (m, 2H), 7.48 – 7.33 (m, 2H), 3.92 – 3.77 (m, 2H), 3.17 – 3.03 (m, 14H), 2.24 – 2.04 (m, 2H), 1.70 – 1.47 (m, 18H), 1.46 – 1.23 (m, 14H), 0.96 (t,  $J = 7.3$  Hz, 20H).  **$^{13}\text{C}\{^1\text{H}\}\text{-NMR}$**  (101 MHz,  $\text{CD}_3\text{CN}$ ,  $\delta/\text{ppm}$ ): 158.46 (d,  $J = 6.1$  Hz), 128.68 (q,  $J = 275.5$  Hz), 127.27 – 127.10 (m), 125.74 (q,  $J = 270.4$  Hz), 123.98 (q,  $J = 32.2$  Hz), 121.10 (d,  $J = 5.0$  Hz), 65.40 (d,  $J = 6.3$  Hz), 59.79 – 54.70 (m), 35.90 – 32.26 (m), 30.29 (d,  $J = 7.4$  Hz), 24.25, 21.09 – 19.13 (m), 19.26 (q,  $J = 3.3$  Hz), 13.73.  **$^{19}\text{F-NMR}$**  (377 MHz,  $\text{CD}_3\text{CN}$ ,  $\delta/\text{ppm}$ ): -61.94 (*para*), -62.98 (*meta*), -66.94 – -67.13 (m, both).  **$^{31}\text{P}\{^1\text{H}\}\text{-NMR}$**  (162 MHz,  $\text{CD}_3\text{CN}$ ,  $\delta/\text{ppm}$ ): -1.32. **HRMS** (ESI)  $m/z$  for  $\text{C}_{12}\text{H}_{12}\text{F}_6\text{O}_4\text{P}$  [ $\text{M-H}$ ] $^-$ : calcd. 365.0383, found 365.0381.

### Synthesis of benzo[*d*][1,3]dioxol-5-yl (5,5,5-trifluoropentyl) phosphate (**45**)

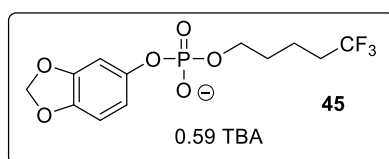

The compound was synthesized according to the general procedure C from 5,5,5-trifluoropentyl phosphate x 1.22 TBA (**38**, 155 mg, 300  $\mu$ mol) and 6-(trimethylsilyl)benzo[*d*][1,3]dioxol-5-yl trifluoromethanesulfonate (**SI-9**, 257 mg, 750  $\mu$ mol, 2.5 eq). The product (**45**, 89 mg, 184  $\mu$ mol, 61%) was isolated as a colorless oil.

**$^1\text{H-NMR}$**  (400 MHz,  $\text{CD}_3\text{CN}$ ,  $\delta/\text{ppm}$ ): 6.79 (dd,  $J = 2.2, 0.8$  Hz, 1H), 6.70 (d,  $J = 8.4$  Hz, 1H), 6.64 (ddd,  $J = 8.4, 2.3, 1.1$  Hz, 1H), 5.91 (s, 2H), 4.22 – 3.79 (m, 2H), 3.25 – 2.89 (m, 5H), 2.26 – 2.03 (m, 2H), 1.71 – 1.49 (m, 9H), 1.46 – 1.27 (m, 5H), 0.96 (t,  $J = 7.3$  Hz, 7H).  **$^{13}\text{C}\{^1\text{H}\}\text{-$**

**NMR** (101 MHz, CD<sub>3</sub>CN,  $\delta$ /ppm): 148.76 (d,  $J = 6.7$  Hz), 148.64, 144.11, 128.69 (q,  $J = 275.6$  Hz), 113.20 (d,  $J = 4.9$  Hz), 108.38, 103.50 (d,  $J = 4.5$  Hz), 102.47, 66.01 (d,  $J = 6.0$  Hz), 63.00 – 54.55 (m), 33.52 (q,  $J = 28.0$  Hz), 30.17 (d,  $J = 7.4$  Hz), 24.24, 21.30 – 19.63 (m), 19.14 (q,  $J = 3.3$  Hz), 13.72. **<sup>19</sup>F NMR** (377 MHz, CD<sub>3</sub>CN,  $\delta$ /ppm): -66.98 (t,  $J = 11.4$  Hz). **<sup>31</sup>P{<sup>1</sup>H}-NMR** (162 MHz, CD<sub>3</sub>CN,  $\delta$ /ppm): -6.49. **HRMS** (ESI)  $m/z$  for C<sub>12</sub>H<sub>13</sub>F<sub>3</sub>O<sub>6</sub>P [M-H]<sup>-</sup>: calcd. 341.0407, found 341.0403.

### Synthesis of 4-ethynylphenyl (5,5,5-trifluoropentyl) phosphate (**46**)

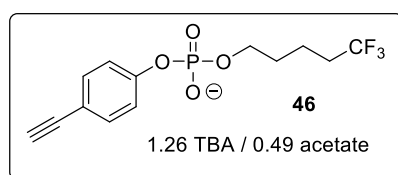

The compound was synthesized according to the general procedure C from 5,5,5-trifluoropentyl phosphate x 1.22 TBA (**38**, 155 mg, 300  $\mu$ mol) and 2-(trimethylsilyl)-4-((trimethylsilyl)ethynyl)phenyl trifluoromethanesulfonate (**SI-23**, 253 mg, 750  $\mu$ mol, 2.5 eq). The crude product was obtained as a 84:16 mixture (*para:meta*). The product (**46**, 127 mg, 193  $\mu$ mol, 64%) was isolated as a 63:37 mixture (*para:meta*) as a colorless oil. The NMR data are given for the mixture, an assignment to the isomers was made if possible.

**<sup>1</sup>H-NMR** (400 MHz, CD<sub>3</sub>CN,  $\delta$ /ppm): 7.39 – 7.31 (m, 1.5H, both), 7.22 – 7.16 (m, 1.9H, both), 7.11 – 7.04 (m, 0.4H, *meta*), 3.85 – 3.76 (m, 2H, both), 3.33 (s, 0.4H, *meta*), 3.26 (s, 0.6H, *para*), 3.16 – 3.03 (m, 10H, both), 2.23 – 2.02 (m, 2H, both), 1.68 – 1.46 (m, 14H, both), 1.44 – 1.24 (m, 10H, both), 1.05 – 0.90 (m, 15H, both). **<sup>13</sup>C{<sup>1</sup>H}-NMR** (101 MHz, CD<sub>3</sub>CN,  $\delta$ /ppm): 156.48 (d,  $J = 6.4$  Hz, *para*), 155.69 (d,  $J = 6.4$  Hz, *meta*), 133.70 (*para*), 130.00 (*meta*), 128.73 (q,  $J = 275.6$  Hz, both), 126.02 (*para*), 123.18 (*meta*), 122.02 (d,  $J = 5.1$  Hz, *meta*), 120.94 (d,  $J = 5.2$  Hz, *para*), 115.59, 84.50 (*para*), 84.23 (*meta*), 78.24 (*meta*), 77.21 (*para*), 65.06 (d,  $J = 6.3$  Hz, both), 62.17 – 57.65 (m, both), 33.58 (qd,  $J = 28.0, 2.3$  Hz, both), 30.42 (dd,  $J = 7.3, 3.1$  Hz, both), 24.25 (both), 21.89 – 19.93 (m, both), 19.99 – 18.48 (m, both), 13.73 (both). **<sup>19</sup>F NMR** (377 MHz, CD<sub>3</sub>CN,  $\delta$ /ppm): -66.84 – -67.09 (m, both). **<sup>31</sup>P{<sup>1</sup>H}-NMR** (162 MHz, CD<sub>3</sub>CN,  $\delta$ /ppm): -5.61 (*meta*), -5.77 (*para*). **HRMS** (ESI)  $m/z$  for C<sub>13</sub>H<sub>13</sub>F<sub>3</sub>O<sub>4</sub>P [M-H]<sup>-</sup>: calcd. 321.0509, found 321.0507.



### Synthesis of 3-bromophenyl (5,5,5-trifluoropentyl) phosphate (47)

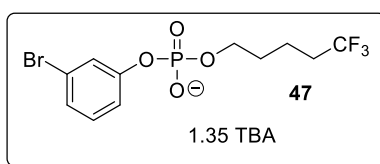

The compound was synthesized according to the general procedure C from 5,5,5-trifluoropentyl phosphate x 1.22 TBA (**38**, 155 mg, 300  $\mu$ mol) and 2-bromo-6-(trimethylsilyl)phenyl trifluoromethanesulfonate (283 mg, 750  $\mu$ mol, 2.5 eq). The crude product was obtained as a 88:12 mixture (*meta:ortho*). The product (**47**, 121 mg, 172  $\mu$ mol, 57%) was isolated as a colorless oil in a similar regioisomeric ratio. Redundant TBA counterions are assumed to be hydroxide.

**$^1\text{H-NMR}$**  (400 MHz,  $\text{CD}_3\text{CN}$ ,  $\delta/\text{ppm}$ ): 7.45 (ddd,  $J = 1.7, 1.7, 0.9$  Hz, 1H), 7.22 – 7.08 (m, 3H), 3.90 – 3.66 (m, 2H), 3.25 – 2.96 (m, 11H), 2.26 – 2.05 (m, 2H), 1.70 – 1.48 (m, 15H), 1.41 – 1.28 (m, 11H), 0.96 (t,  $J = 7.3$  Hz, 16H).  **$^{13}\text{C}\{^1\text{H}\}\text{-NMR}$**  (101 MHz,  $\text{CD}_3\text{CN}$ ,  $\delta/\text{ppm}$ ): 155.64 (d,  $J = 6.6$  Hz), 130.29, 127.72 (q,  $J = 275.5$  Hz), 124.48, 123.01 (d,  $J = 4.8$  Hz), 121.33, 118.97 (d,  $J = 5.2$  Hz), 64.28 (d,  $J = 6.1$  Hz), 64.21 – 49.20 (m), 32.64 (q,  $J = 28.0$  Hz), 29.44 (d,  $J = 7.3$  Hz), 23.31, 21.02 – 18.82 (m), 18.37 (q,  $J = 3.1$  Hz), 12.79.  **$^{19}\text{F-NMR}$**  (377 MHz,  $\text{CD}_3\text{CN}$ ,  $\delta/\text{ppm}$ ): -66.99 (t,  $J = 11.3$  Hz).  **$^{31}\text{P}\{^1\text{H}\}\text{-NMR}$**  (162 MHz,  $\text{CD}_3\text{CN}$ ,  $\delta/\text{ppm}$ ): -6.02. **HRMS** (ESI)  $m/z$  for  $\text{C}_{11}\text{H}_{12}\text{BrF}_3\text{O}_4\text{P}$  [ $\text{M-H}$ ]: calcd. 374.9614, found 374.9613.

### Synthesis of 4-chlorophenyl (5,5,5-trifluoropentyl) phosphate (48)

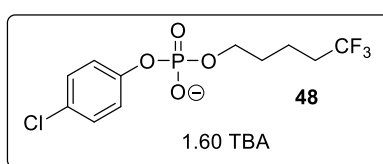

The compound was synthesized according to the general procedure C from 5,5,5-trifluoropentyl phosphate x 1.22 TBA (**38**, 155 mg, 300  $\mu$ mol) and 5-chloro-2-(trimethylsilyl)phenyl trifluoromethanesulfonate (**SI-10**, 250 mg, 750  $\mu$ mol, 2.5 eq). The crude product was obtained as a 78:22 mixture (*para:meta*). The product (**48**, 123 mg, 171  $\mu$ mol, 57%) was isolated as a 81:19 mixture (*para:meta*) as a colorless oil. The NMR data are given for the major isomer. Redundant TBA-counterions are assumed to be hydroxide.

**$^1\text{H-NMR}$**  (400 MHz,  $\text{CD}_3\text{CN}$ ,  $\delta/\text{ppm}$ ): 7.20 (s, 4H), 3.86 – 3.71 (m, 2H), 3.16 – 3.02 (m, 13H), 2.20 – 2.06 (m, 2H), 1.68 – 1.46 (m, 17H), 1.45 – 1.20 (m, 13H), 0.96 (t,  $J = 7.3$  Hz, 19H).  **$^{13}\text{C}\{^1\text{H}\}\text{-NMR}$**  (101 MHz,  $\text{CD}_3\text{CN}$ ,  $\delta/\text{ppm}$ ): 154.67 (d,  $J = 6.6$  Hz), 129.48, 128.73 (q,  $J = 275.6$

Hz), 122.37 (d,  $J = 5.0$  Hz), 122.23, 65.03 (d,  $J = 6.3$  Hz), 61.89 – 53.86 (m), 33.57 (q,  $J = 28.0$  Hz), 30.41 (d,  $J = 7.3$  Hz), 24.25, 21.72 – 19.36 (m), 19.31 (q,  $J = 3.2$  Hz), 13.73.  $^{19}\text{F}$  NMR (377 MHz,  $\text{CD}_3\text{CN}$ ,  $\delta/\text{ppm}$ ): -66.99 (t,  $J = 11.4$  Hz).  $^{31}\text{P}\{^1\text{H}\}$ -NMR (162 MHz,  $\text{CD}_3\text{CN}$ ,  $\delta/\text{ppm}$ ): -5.53. HRMS (ESI)  $m/z$  for  $\text{C}_{11}\text{H}_{12}\text{ClF}_3\text{O}_4\text{P}$  [M-H] $^-$ : calcd. 331.0119, found 331.0119.

### Synthesis of naphthalen-2-yl (5,5,5-trifluoropentyl) phosphate (49)

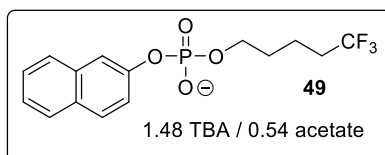

The compound was synthesized according to the general procedure C from 5,5,5-trifluoropentyl phosphate x 1.22 TBA (**38**, 155 mg, 300  $\mu\text{mol}$ ) and 3-(trimethylsilyl)naphthalen-2-yl trifluoromethanesulfonate (**SI-12**, 261 mg, 750  $\mu\text{mol}$ , 2.5 eq). The product (**49**, 95 mg, 129  $\mu\text{mol}$ , 43%) was isolated as a colorless oil.

$^1\text{H}$ -NMR (400 MHz,  $\text{CD}_3\text{CN}$ ,  $\delta/\text{ppm}$ ): 7.84 – 7.71 (m, 3H), 7.68 – 7.62 (m, 1H), 7.48 – 7.38 (m, 2H), 7.34 (ddd,  $J = 8.1, 6.8, 1.3$  Hz, 1H), 3.90 – 3.82 (m, 2H), 3.13 – 3.03 (m, 12H), 2.20 – 2.02 (m, 2H), 1.71 – 1.47 (m, 16H), 1.48 – 1.24 (m, 12H), 0.95 (t,  $J = 7.3$  Hz, 18H).  $^{13}\text{C}\{^1\text{H}\}$ -NMR (101 MHz,  $\text{CD}_3\text{CN}$ ,  $\delta/\text{ppm}$ ): 153.45 (d,  $J = 6.4$  Hz), 135.30, 130.36, 129.34, 128.70 (q,  $J = 275.5$  Hz), 128.34, 127.79, 126.81, 124.70, 122.71 (d,  $J = 5.4$  Hz), 115.88 (d,  $J = 5.0$  Hz), 65.07 (d,  $J = 6.3$  Hz), 61.18 – 55.22 (m), 33.56 (q,  $J = 27.8$  Hz), 30.45 (d,  $J = 7.5$  Hz), 24.23, 21.85 – 19.03 (m), 19.34 (q,  $J = 3.3$  Hz), 13.73.  $^{19}\text{F}$  NMR (377 MHz,  $\text{CD}_3\text{CN}$ ,  $\delta/\text{ppm}$ ): -66.98 (t,  $J = 11.4$  Hz).  $^{31}\text{P}\{^1\text{H}\}$ -NMR (162 MHz,  $\text{CD}_3\text{CN}$ ,  $\delta/\text{ppm}$ ): -5.44. HRMS (ESI)  $m/z$  for  $\text{C}_{15}\text{H}_{15}\text{F}_3\text{O}_4\text{P}$  [M-H] $^-$ : calcd. 347.0666, found 347.0666.

### Synthesis of 1H-indol-5-yl (5,5,5-trifluoropentyl) phosphate (50)

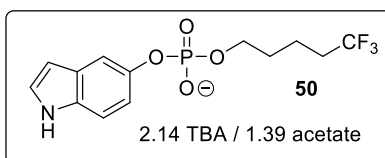

The compound was synthesized according to the general procedure C from 5,5,5-trifluoropentyl phosphate x 1.22 TBA (**38**, 155 mg, 300  $\mu\text{mol}$ ) and 4-(trimethylsilyl)-1H-indol-5-yl trifluoromethanesulfonate (253 mg, 750  $\mu\text{mol}$ , 2.5 eq). The crude product was obtained as a 85:15 mixture (5-**50**:4-**50**). The product (**50**, 107 mg, 114  $\mu\text{mol}$ , 38%) was isolated as a 92:8 mixture (5-**50**:4-**50**) as a light green solid. The NMR data are given for the major isomer.

**$^1\text{H-NMR}$**  (400 MHz,  $\text{CD}_3\text{CN}$ ,  $\delta/\text{ppm}$ ): 9.78 (s, 1H), 7.35 (td,  $J = 1.4, 0.6$  Hz, 1H), 7.25 (dd,  $J = 8.7, 0.8$  Hz, 1H), 7.18 (ddd,  $J = 3.0, 2.4, 0.4$  Hz, 1H), 6.97 (dddd,  $J = 8.8, 2.3, 1.0, 0.4$  Hz, 1H), 6.33 (ddd,  $J = 3.0, 2.0, 0.9$  Hz, 1H), 3.89 – 3.77 (m, 2H), 3.17 – 2.96 (m, 17H), 2.24 – 2.05 (m, 2H), 1.66 – 1.49 (m, 21H), 1.42 – 1.24 (m, 17H), 0.96 (t,  $J = 7.3$  Hz, 26H).  **$^{13}\text{C}\{^1\text{H}\}\text{-NMR}$**  (101 MHz,  $\text{CD}_3\text{CN}$ ,  $\delta/\text{ppm}$ ): 149.00 (d,  $J = 6.8$  Hz), 133.03, 129.08, 128.78 (q,  $J = 275.5$  Hz), 126.20, 116.55 (d,  $J = 4.9$  Hz), 111.79, 110.93 (d,  $J = 4.3$  Hz), 101.92, 64.81 (d,  $J = 6.1$  Hz), 33.62 (q,  $J = 27.9$  Hz), 30.58 (d,  $J = 7.3$  Hz), 24.25, 21.45 – 18.68 (m), 19.38 (q,  $J = 3.3$  Hz), 13.73.  **$^{19}\text{F}$  NMR** (377 MHz,  $\text{CD}_3\text{CN}$ ,  $\delta/\text{ppm}$ ): -66.96 (t,  $J = 11.3$  Hz).  **$^{31}\text{P}\{^1\text{H}\}\text{-NMR}$**  (162 MHz,  $\text{CD}_3\text{CN}$ ,  $\delta/\text{ppm}$ ): -4.70. **HRMS** (ESI)  $m/z$  for  $\text{C}_{13}\text{H}_{14}\text{F}_3\text{NO}_4\text{P}$   $[\text{M-H}]^-$ : calcd. 336.0618, found 336.0617.

### Synthesis of pyren-2-yl (5,5,5-trifluoropentyl) phosphate (**51**)

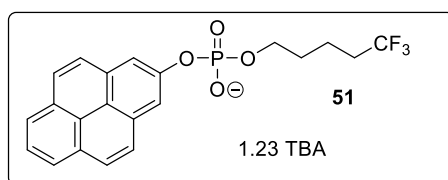

The compound was synthesized according to the general procedure C from 5,5,5-trifluoropentyl phosphate x 1.22 TBA (**38**, 155 mg, 300  $\mu\text{mol}$ ) and 2-(trimethylsilyl)pyren-1-yl trifluoromethanesulfonate (**SI-19**, 317 mg, 750  $\mu\text{mol}$ , 2.5 eq). The crude product was obtained as a 78:22 mixture (2-**51**:1-**51**). The product (**51**, 125 mg, 174  $\mu\text{mol}$ , 58%) was isolated as a 78:22 mixture (2-**51**:1-**51**) as a light-yellow oil. The NMR data are given for the major isomer. Redundant TBA counterions are assumed to be hydroxide.

**$^1\text{H-NMR}$**  (400 MHz,  $\text{CD}_3\text{CN}$ ,  $\delta/\text{ppm}$ ): 8.27 – 7.88 (m, 9H), 4.11 – 3.84 (m, 2H), 3.26 – 2.92 (m, 10H), 2.21 – 2.02 (m, 2H), 1.72 – 1.50 (m, 14H), 1.42 – 1.22 (m, 10H), 0.96 (t,  $J = 7.3$  Hz, 15H).  **$^{13}\text{C}\{^1\text{H}\}\text{-NMR}$**  (101 MHz,  $\text{CD}_3\text{CN}$ ,  $\delta/\text{ppm}$ ): 153.66 (d,  $J = 6.4$  Hz), 133.09, 131.35, 128.67 (q,  $J = 275.5$  Hz), 128.47, 128.01, 126.20, 125.97, 117.55 (d,  $J = 5.1$  Hz), 65.39 (d,  $J = 6.0$  Hz), 60.51 – 53.67 (m), 35.11 – 32.44 (m), 30.42 (d,  $J = 7.4$  Hz), 24.23, 22.07 – 18.77 (m), 19.33 (q,  $J = 3.2$  Hz), 13.72.  **$^{19}\text{F}$  NMR** (377 MHz,  $\text{CD}_3\text{CN}$ ,  $\delta/\text{ppm}$ ): -67.05 (t,  $J = 11.3$  Hz).  **$^{31}\text{P}\{^1\text{H}\}\text{-NMR}$**  (162 MHz,  $\text{CD}_3\text{CN}$ ,  $\delta/\text{ppm}$ ): -5.93. **HRMS** (ESI)  $m/z$  for  $\text{C}_{21}\text{H}_{17}\text{F}_3\text{O}_4\text{P}$   $[\text{M-H}]^-$ : calcd. 421.0822, found 421.0819.

## 6. Cluster 2B: Synthesis of (Pyro-)phosphodiesters (phosphate-Scope)

**Diphenylphosphate (52)**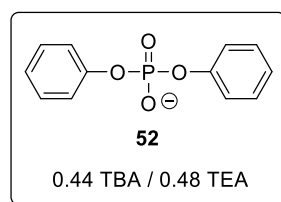

The compound was synthesized according to the general procedure C from phenylphosphate x 1.0 TBA (200 mg, 467  $\mu\text{mol}$ ) and 2-(trimethylsilyl)phenyl trifluoromethanesulfonate (**1**, 2.5 eq.). The product (**52**, 102 mg, 254  $\mu\text{mol}$ , 55%) was isolated as colorless oil.

**$^1\text{H-NMR}$**  (400 MHz,  $\text{D}_2\text{O}$ ,  $\delta/\text{ppm}$ ):  $\delta$  7.45 – 7.38 (m, 4H), 7.27 – 7.20 (m, 6H), 3.27 – 3.12 (m, 6H), 1.71 – 1.59 (m, 4H), 1.48 – 1.32 (m, 3H), 1.28 (t,  $J = 7.4$  Hz, 4H), 0.95 (t,  $J = 7.4$  Hz, 5H).  **$^{13}\text{C}\{^1\text{H}\}\text{-NMR}$**  (101 MHz,  $\text{D}_2\text{O}$ ,  $\delta/\text{ppm}$ ): 151.62 (d,  $J = 7.2$  Hz), 129.80, 124.52 (d,  $J = 1.2$  Hz), 120.22 (d,  $J = 4.6$  Hz), 58.72 – 57.16 (m), 46.64, 23.10, 20.47 – 18.36 (m), 12.79, 8.19.  **$^{31}\text{P}\{^1\text{H}\}\text{-NMR}$**  (162 MHz,  $\text{D}_2\text{O}$ ,  $\delta/\text{ppm}$ ): -8.85. **HRMS** (ESI)  $m/z$  for  $\text{C}_{12}\text{H}_{10}\text{O}_4\text{P}$   $[\text{M-H}]^-$ : calcd. 249.0322, found 249.0322.

**Pentyl -phenylphosphate (53)**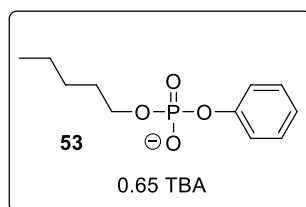

The compound was synthesized according to the general procedure C from pentylphosphate x 1.0 TBA (**67**, 123 mg, 300  $\mu\text{mol}$ ) and 2-(trimethylsilyl)phenyl trifluoromethanesulfonate (**1**, 2.5 eq.). The product (**53**, 0.65 TBA, 67.0 mg, 167  $\mu\text{mol}$ , 56%) was isolated as colorless oil.

*Alternative procedure (avoiding THF-side reaction):*

TBAF (1 M in THF, 750  $\mu\text{L}$ , 750  $\mu\text{mol}$ , 2.5 eq.) was dried under high vacuum and dissolved in dry MeCN (750  $\mu\text{L}$ ). This was repeated twice and the resulting solution was then added to a solution of Pentylphosphate x 1.1 TBA (**67**, 130 mg, 300 mmol) and 2-(trimethylsilyl)phenyl trifluoromethanesulfonate (**1**, 182  $\mu\text{L}$ , 750  $\mu\text{mol}$ , 2.5 eq.) in MeCN (1.5 mL) with a syringe pump (1 h, needle tip is below solvent surface). Purification was done according to the general

procedure C. The product (**53**, 0.65 TEA, 67.2 mg, 216  $\mu\text{mol}$ , 72%) was isolated as colorless oil.

**$^1\text{H-NMR}$**  (400 MHz,  $\text{CD}_3\text{CN}$ ,  $\delta/\text{ppm}$ ): 7.29 – 7.23 (m, 2H), 7.22 – 7.17 (m, 2H), 7.06 – 6.99 (m, 1H), 3.87 (q,  $J = 6.6$  Hz, 2H), 3.15 – 3.04 (m, 5H), 1.65 – 1.50 (m, 2H), 1.41 – 1.22 (m, 9H), 0.96 (t,  $J = 7.3$  Hz, 7H), 0.89 – 0.84 (m, 3H).  **$^{13}\text{C}\{^1\text{H}\}\text{-NMR}$**  (101 MHz,  $\text{CD}_3\text{CN}$ ,  $\delta/\text{ppm}$ ): 154.47 (d,  $J = 6.5$  Hz), 130.02, 123.61, 121.15 (d,  $J = 5.0$  Hz), 66.66 (d,  $J = 6.3$  Hz), 59.74 – 58.85 (m), 31.15 (d,  $J = 7.3$  Hz), 28.74, 24.32, 23.09, 21.39 – 19.80 (m), 14.34, 13.82.  **$^{31}\text{P}\{^1\text{H}\}\text{-NMR}$**  (162 MHz,  $\text{CD}_3\text{CN}$ ,  $\delta/\text{ppm}$ ): -6.80. **HRMS** (ESI)  $m/z$  for  $\text{C}_{11}\text{H}_{16}\text{O}_4\text{P}$   $[\text{M-H}]^-$ : calcd. 243,0792, found 243,0791.

### Phenyl-phenylphosphonate (**54**)

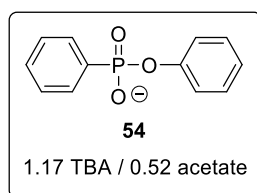

The compound was synthesized according to the general procedure C from phenylphosphonate x 1.0 TBA (201 mg, 500  $\mu\text{mol}$ ) and 2-(trimethylsilyl)phenyl trifluoromethanesulfonate (**1**, 2.5 eq.). The product (**54**, 127 mg, 229  $\mu\text{mol}$ , 46%) was isolated as colorless oil.

**$^1\text{H-NMR}$**  (400 MHz,  $\text{D}_2\text{O}$ ,  $\delta/\text{ppm}$ ): 7.81 – 7.73 (m, 2H), 7.61 – 7.55 (m, 1H), 7.54 – 7.47 (m, 2H), 7.34 – 7.27 (m, 2H), 7.18 – 7.12 (m, 1H), 7.04 – 6.99 (m, 2H), 3.25 – 3.11 (m, 9H), 1.70 – 1.57 (m, 9H), 1.36 (h,  $J = 7.4$  Hz, 9H), 0.95 (t,  $J = 7.3$  Hz, 14H).  **$^{13}\text{C}\{^1\text{H}\}\text{-NMR}$**  (101 MHz,  $\text{D}_2\text{O}$ ,  $\delta/\text{ppm}$ ): 151.51 (d,  $J = 7.1$  Hz), 132.66 (d,  $J = 181.1$  Hz), 131.39 (d,  $J = 3.0$  Hz), 131.18 (d,  $J = 9.5$  Hz), 129.58, 128.38 (d,  $J = 14.1$  Hz), 124.19 (d,  $J = 1.3$  Hz), 121.02 (d,  $J = 3.8$  Hz), 58.69 – 57.62 (m), 23.09, 19.51 – 17.77 (m), 12.79.  **$^{31}\text{P}\{^1\text{H}\}\text{-NMR}$**  (162 MHz,  $\text{D}_2\text{O}$ ,  $\delta/\text{ppm}$ ): 12.99. **HRMS** (ESI)  $m/z$  for  $\text{C}_{12}\text{H}_{10}\text{O}_3\text{P}$   $[\text{M-H}]^-$ : calcd. 233.0373, found 233.0373.

**Pent-4-yn-1-yl-phenylphosphate (55)**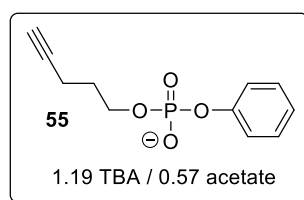

The compound was synthesized according to the general procedure C from pent-4-yn-1-ylphosphate x 1.0 TBA (**SI-3**, 203 mg, 500  $\mu$ mol) and 2-(trimethylsilyl)phenyl trifluoromethanesulfonate (**1**, 2.5 eq.). The product (**55**, 136 mg, 242  $\mu$ mol, 48%) was isolated as colorless oil.

**$^1\text{H-NMR}$**  (400 MHz,  $\text{D}_2\text{O}/\text{MeCN-d}_3$ ,  $\delta/\text{ppm}$ ): 7.66 – 7.58 (m, 2H), 7.46 – 7.38 (m, 3H), 4.24 (q,  $J = 6.3$  Hz, 2H), 3.46 – 3.33 (m, 10H), 2.58 (t,  $J = 2.7$  Hz, 1H), 2.50 (td,  $J = 7.1, 2.7$  Hz, 2H), 2.04 (ttd,  $J = 7.1, 6.1, 0.9$  Hz, 2H), 1.85 (ddd,  $J = 11.8, 10.0, 6.3$  Hz, 10H), 1.59 (h,  $J = 7.4$  Hz, 10H), 1.19 (t,  $J = 7.4$  Hz, 14H).  **$^{13}\text{C}\{^1\text{H}\}\text{-NMR}$**  (101 MHz,  $\text{D}_2\text{O}/\text{MeCN-d}_3$ ,  $\delta/\text{ppm}$ ): 152.43 (d,  $J = 6.8$  Hz), 129.85, 124.09, 120.40 (d,  $J = 4.6$  Hz), 84.85, 69.82, 65.00 (d,  $J = 5.9$  Hz), 58.94 – 57.12 (m), 29.12 (d,  $J = 7.6$  Hz), 23.36, 20.48 – 18.45 (m), 14.43, 13.09.  **$^{31}\text{P}\{^1\text{H}\}\text{-NMR}$**  (162 MHz,  $\text{D}_2\text{O}/\text{MeCN-d}_3$ ,  $\delta/\text{ppm}$ ): -4.34. **HRMS** (ESI)  $m/z$  for  $\text{C}_{11}\text{H}_{12}\text{O}_4\text{P}$  [ $\text{M-H}$ ]: calcd. 239.0479, found 239.0480.

**Isoprenyl-phenylphosphate (56)**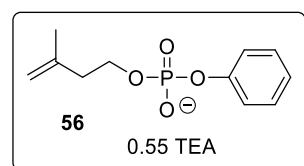

The compound was synthesized according to the general procedure C from isoprenylphosphate x 1.25 TBA (**SI-15**, 134 mg, 288  $\mu$ mol) and 2-(trimethylsilyl)phenyl trifluoromethanesulfonate (**1**, 2.5 eq.). The product (**56**, 33.3 mg, 112  $\mu$ mol, 39%) was isolated as colorless oil.

**$^1\text{H-NMR}$**  (400 MHz,  $\text{CD}_3\text{CN}$ ,  $\delta/\text{ppm}$ ): 7.33 – 7.27 (m, 2H), 7.22 – 7.17 (m, 2H), 7.12 – 7.06 (m, 1H), 4.77 (dq,  $J = 2.2, 1.5, 0.7$  Hz, 1H), 4.72 (dq,  $J = 2.2, 1.2$  Hz, 1H), 4.04 (q,  $J = 6.8$  Hz, 2H), 2.96 (qd,  $J = 7.3, 4.7$  Hz, 3H), 2.32 (tdd,  $J = 6.8, 1.2, 0.6$  Hz, 2H), 1.71 (td,  $J = 1.0, 0.5$  Hz, 3H), 1.18 (t,  $J = 7.3$  Hz, 5H).  **$^{13}\text{C}\{^1\text{H}\}\text{-NMR}$**  (101 MHz,  $\text{CD}_3\text{CN}$ ,  $\delta/\text{ppm}$ ): 153.75 (d,  $J = 6.7$  Hz), 143.49, 130.28, 124.40, 121.22 (d,  $J = 4.7$  Hz), 112.50, 65.39 (d,  $J = 6.2$  Hz), 46.75, 39.20 (d,  $J = 7.7$  Hz), 22.56, 8.94.  **$^{31}\text{P}\{^1\text{H}\}\text{-NMR}$**  (162 MHz,  $\text{CD}_3\text{CN}$ ,  $\delta/\text{ppm}$ ): -6.95. **HRMS** (ESI)  $m/z$  for  $\text{C}_{11}\text{H}_{14}\text{O}_4\text{P}$  [ $\text{M-H}$ ]: calcd. 241.0635, found 241.0636.

**Geranyl-phenylphosphate (57)**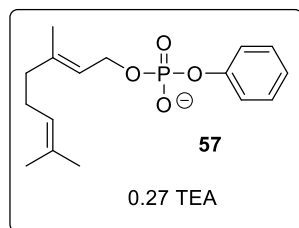

The compound was synthesized according to the general procedure C from geranylphosphate x 1.4 TBA (**SI-14**, 158 mg, 275  $\mu\text{mol}$ ) and 2-(trimethylsilyl)phenyl trifluoromethanesulfonate (**1**, 2.5 eq.). In this case the purification procedure required modification. After the reaction, the solvent was removed, and the residue was dissolved in TEAA-buffer (10 mM). Insolubles were removed and the solution was directly applied to RP-MPLC (see general procedure C). The product (**57**, 25.1 mg, 74.7  $\mu\text{mol}$ , 27%) was isolated as colorless oil.

**$^1\text{H-NMR}$**  (400 MHz,  $\text{CD}_3\text{CN}$ ,  $\delta/\text{ppm}$ ): 7.30 – 7.24 (m, 2H), 7.21 – 7.16 (m, 2H), 7.07 – 7.01 (m, 1H), 5.32 (tq,  $J = 6.7, 1.3$  Hz, 1H), 5.08 (tdt,  $J = 5.7, 2.9, 1.4$  Hz, 1H), 4.41 (m, 2H), 2.96 (q,  $J = 7.3$  Hz, 2H), 1.66 – 1.64 (m, 3H), 1.61 (d,  $J = 1.3$  Hz, 3H), 1.59 – 1.57 (m, 3H), 1.19 (t,  $J = 7.3$  Hz, 3H).  **$^{13}\text{C}\{^1\text{H}\}\text{-NMR}$**  (101 MHz,  $\text{CD}_3\text{CN}$ ,  $\delta/\text{ppm}$ ): 154.32 (d,  $J = 5.3$  Hz), 140.90, 132.47, 130.21, 124.94, 123.93, 121.87 (d,  $J = 6.7$  Hz), 121.16 (d,  $J = 3.2$  Hz), 63.48 (d,  $J = 3.6$  Hz), 46.65, 40.14, 27.12, 25.82, 17.79, 16.53, 8.92.  **$^{31}\text{P}\{^1\text{H}\}\text{-NMR}$**  (162 MHz,  $\text{CD}_3\text{CN}$ ,  $\delta/\text{ppm}$ ): -5.83. **HRMS** (ESI)  $m/z$  for  $\text{C}_{16}\text{H}_{22}\text{O}_4\text{P}$  [ $\text{M-H}$ ] $^-$ : calcd. 309.1261, found 309.1266.

**6-Hydroxyhexyl-phenylphosphate (58)**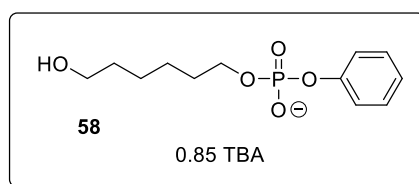

The compound was synthesized according to the general procedure C from 6-hydroxyhexylphosphate x 1.20 TBA (**SI-13**, 183 mg, 377  $\mu\text{mol}$ ) and 2-(trimethylsilyl)phenyl trifluoromethanesulfonate (**1**, 2.5 eq.). The product (**58**, 28.0 mg, 55.8  $\mu\text{mol}$ , 15%) was isolated as colorless oil.

**$^1\text{H-NMR}$**  (400 MHz,  $\text{D}_2\text{O}/\text{MeCN-d}_3$ ,  $\delta/\text{ppm}$ ): 7.58 – 7.51 (m, 2H), 7.38 – 7.31 (m, 3H), 4.09 (q,  $J = 6.5$  Hz, 2H), 3.69 (t,  $J = 6.8$  Hz, 2H), 3.34 – 3.26 (m, 7H), 1.83 – 1.71 (m, 9H), 1.65 (p,  $J = 6.8$  Hz, 2H), 1.57 – 1.44 (m, 11H), 1.41 (t,  $J = 7.3$  Hz, 1H), 1.11 (t,  $J = 7.4$  Hz, 10H).

$^{13}\text{C}\{^1\text{H}\}$ -NMR (101 MHz,  $\text{D}_2\text{O}/\text{MeCN-d}_3$ ,  $\delta/\text{ppm}$ ): 152.97 (d,  $J = 6.8$  Hz), 130.54, 124.84, 120.99 (d,  $J = 4.6$  Hz), 67.43 (d,  $J = 6.3$  Hz), 62.52, 59.63 – 57.79 (m), 47.46, 32.23, 30.63 (d,  $J = 7.2$  Hz), 25.63 (d,  $J = 8.8$  Hz), 23.99, 21.10 – 19.15 (m), 13.74.  $^{31}\text{P}\{^1\text{H}\}$ -NMR (162 MHz,  $\text{D}_2\text{O}/\text{MeCN-d}_3$ ,  $\delta/\text{ppm}$ ): -4.22. **HRMS** (ESI)  $m/z$  for  $\text{C}_{12}\text{H}_{18}\text{O}_5\text{P}$   $[\text{M}-\text{H}]^-$ : calcd. 273.0897, found 273.0899.

### D4T-phenylphosphate (**59**)

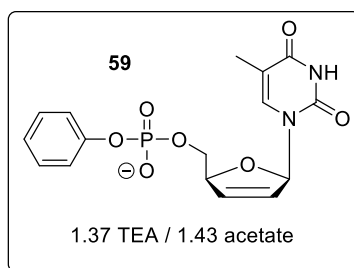

The compound was synthesized according to the general procedure C from d4T-monophosphate x 1.44 TBA (**SI-5**, 120 mg, 184  $\mu\text{mol}$ ) and 2-(trimethylsilyl)phenyl trifluoromethanesulfonate (**1**, 2.5 eq.). The product (**59**, 45.4 mg, 74.5  $\mu\text{mol}$ , 41%) was isolated as colorless oil.

$^1\text{H}$ -NMR (400 MHz,  $\text{D}_2\text{O}$ ,  $\delta/\text{ppm}$ ): 7.33 (q,  $J = 1.2$  Hz, 1H), 7.25 (dd,  $J = 8.4, 7.3$  Hz, 2H), 7.12 – 7.02 (m, 3H), 6.90 (dt,  $J = 3.2, 1.7$  Hz, 1H), 6.49 (dt,  $J = 6.2, 1.8$  Hz, 1H), 5.90 (dt,  $J = 6.2, 2.0$  Hz, 1H), 5.21 – 5.12 (m, 1H), 4.25 (dt,  $J = 11.6, 2.8$  Hz, 1H), 4.09 (dt,  $J = 11.6, 3.6$  Hz, 1H), 3.21 (q,  $J = 7.3$  Hz, 11H), 1.60 (d,  $J = 1.1$  Hz, 3H), 1.29 (t,  $J = 7.3$  Hz, 16H).  $^{13}\text{C}\{^1\text{H}\}$ -NMR (101 MHz,  $\text{D}_2\text{O}$ ,  $\delta/\text{ppm}$ ):  $\delta$  166.43, 152.19, 151.42 (d,  $J = 7.2$  Hz), 138.22, 134.22, 129.09, 125.04, 124.38, 120.21 (d,  $J = 4.4$  Hz), 110.72, 89.95, 85.65 (d,  $J = 10.4$  Hz), 66.19 (d,  $J = 5.5$  Hz), 46.63, 11.28, 8.20.  $^{31}\text{P}\{^1\text{H}\}$ -NMR (162 MHz,  $\text{D}_2\text{O}$ ,  $\delta/\text{ppm}$ ): -4.85. **HRMS** (ESI)  $m/z$  for  $\text{C}_{16}\text{H}_{16}\text{N}_2\text{O}_7\text{P}$   $[\text{M}-\text{H}]^-$ : calcd. 379.0701, found 379.0706.



**D4T-phenylpyrophosphate (60)**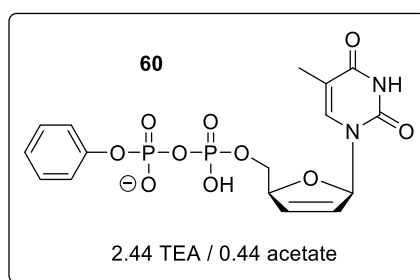

The compound was synthesized according to the general procedure C from d4T-monophosphate x 2.37 TBA (**SI-17**, 150 mg, 157  $\mu\text{mol}$ ) and 2-(trimethylsilyl)phenyl trifluoromethanesulfonate (**1**, 2.5 eq.). In this case the purification procedure required modification. After the reaction, the crude product was precipitated by the addition of  $\text{Et}_2\text{O}$ /pentene (1/1, 40 mL). The precipitate was separated by centrifugation, washed with  $\text{Et}_2\text{O}$ /pentane (1/1, 2 x 30 mL) and dried over high vac. The resulting crude product was dissolved in TEAA-buffer (10 mM) and the solution was directly applied to RP-MPLC (see general procedure C). The product (**60**, 38.8 mg, 52.1  $\mu\text{mol}$ , 33%) was isolated as colorless oil.

**$^1\text{H-NMR}$**  (400 MHz,  $\text{D}_2\text{O}$ ,  $\delta/\text{ppm}$ ): 7.52 (q,  $J = 1.2$  Hz, 1H), 7.35 – 7.26 (m, 2H), 7.18 – 7.09 (m, 3H), 6.97 – 6.91 (m, 1H), 6.45 (dt,  $J = 6.1, 1.8$  Hz, 1H), 5.88 (ddd,  $J = 6.2, 2.4, 1.4$  Hz, 1H), 5.13 – 5.05 (m, 1H), 4.22 – 4.10 (m, 2H), 3.19 (q,  $J = 7.3$  Hz, 15H), 1.78 (dd,  $J = 1.2, 0.4$  Hz, 3H), 1.27 (t,  $J = 7.3$  Hz, 23H).  **$^{13}\text{C}\{^1\text{H}\}\text{-NMR}$**  (101 MHz,  $\text{D}_2\text{O}$ ,  $\delta/\text{ppm}$ ): 166.42, 152.09, 151.71 (d,  $J = 7.2$  Hz), 138.24, 134.06, 129.39, 125.34, 124.09 (d,  $J = 1.2$  Hz), 120.19 (d,  $J = 4.8$  Hz), 111.31, 89.71, 85.89 (d,  $J = 9.7$  Hz), 66.53 (d,  $J = 5.9$  Hz), 46.61, 11.41, 8.20.  **$^{31}\text{P}\{^1\text{H}\}\text{-NMR}$**  (162 MHz,  $\text{D}_2\text{O}$ ,  $\delta/\text{ppm}$ ): -11.95 (d,  $J = 22.0$  Hz), -16.41 (d,  $J = 22.0$  Hz). **HRMS** (ESI)  $m/z$  for  $\text{C}_{16}\text{H}_{17}\text{N}_2\text{O}_{10}\text{P}_2$   $[\text{M-H}]^-$ : calcd. 459.0364, found 459.0365.

**Diphenylpyrophosphate (61)**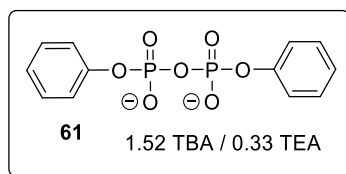

The compound was synthesized according to the general procedure C from Phenylpyrophosphate x 2.4 TBA (**SI-16**, 215 mg, 260  $\mu\text{mol}$ ) and 2-(trimethylsilyl)phenyl trifluoromethanesulfonate (**1**, 2.5 eq.). In this case the purification procedure required modification. After the reaction, the solvent was removed and the residue was dissolved in TEAA-buffer (10 mM). Insolubles were removed and the solution was directly applied to RP-MPLC (see general procedure C). The product (**61**, 89.4 mg, 123  $\mu\text{mol}$ , 47%) was isolated as colorless oil.

**$^1\text{H-NMR}$**  (400 MHz,  $\text{D}_2\text{O}$ ,  $\delta/\text{ppm}$ ): 7.42 – 7.34 (m, 4H), 7.24 – 7.17 (m, 6H), 3.25 – 3.14 (m, 14H), 1.72 – 1.59 (m, 12H), 1.36 (h,  $J = 7.4$  Hz, 12H), 1.28 (t,  $J = 7.3$  Hz, 3H), 0.95 (t,  $J = 7.4$  Hz, 18H).  **$^{13}\text{C}\{^1\text{H}\}\text{-NMR}$**  (101 MHz,  $\text{D}_2\text{O}$ ,  $\delta/\text{ppm}$ ): 151.68 (t,  $J = 3.7$  Hz), 129.63, 124.35, 120.55 (t,  $J = 2.2$  Hz), 58.09, 46.63, 23.10, 19.12, 12.79, 8.19.  **$^{31}\text{P}\{^1\text{H}\}\text{-NMR}$**  (162 MHz,  $\text{D}_2\text{O}$ ,  $\delta/\text{ppm}$ ): -16.13. **HRMS** (ESI)  $m/z$  for  $\text{C}_6\text{H}_{14}\text{O}_5\text{P}$  [M-H]: calcd. 197.0584, found 197.0584.

## 7. Cluster 3: Synthesis of Arylpolyphosphates (cyclophosphate reactions)

### 7.1. Preparation of cyclic metaphosphate (n = 4, 5, 7, 8) x TBA – salts:

Trimetaphosphate was commercially available. Tetrametaphosphate was synthesized as Na-salt on gram-scale according to Bell et al.<sup>11</sup>

A mixture of higher cyclic metaphosphates (n = 3 – 8) was prepared on multi-gram scale according to Glonek et al.<sup>12</sup> from crystalline orthophosphoric acid and DCC in TMU. Preparative separation was possible by automated SAX (Äkta-system, Q-Sepharose). Tri- to heptametaphosphate were eluted with Triethylammoniumbicarbonate-buffer (0.1 - 1M, pH 7.5). Octametaphosphate was eluted with NH<sub>4</sub>HCO<sub>3</sub> – buffer. The sample qualities were polished during a second run of automated SAX (Äkta-system, Q-Sepharose, NH<sub>4</sub>HCO<sub>3</sub> – buffer). The procedure delivered pentametaphosphate, heptametaphosphate and octametaphosphate as NH<sub>4</sub> – salts. Hexametaphosphate could not be isolated sufficient purity. The different ring-sizes were assigned by HRMS.

#### HRMS – data:

**HRMS** (ESI) m/z for H<sub>4</sub>O<sub>15</sub>P<sub>5</sub> [M-H]<sup>-</sup>: calcd. 398.8244, found 398.8255.

**HRMS** (ESI) m/z for H<sub>6</sub>O<sub>21</sub>P<sub>7</sub> [M-H]<sup>-</sup>: calcd. 558.7570, found 558.7587.

**HRMS** (ESI) m/z for H<sub>7</sub>O<sub>24</sub>P<sub>8</sub> [M-H]<sup>-</sup>: calcd. 638.7234, found 638.7238.

For solubility reasons the cations had to be changed to TBA before subsequent reactions. This was achieved by using either DowexH<sup>+</sup> or Chelex<sup>®</sup>TBA<sup>+</sup> as described above. After lyophilization, the TBA-salts were dissolved in MeCN, passed through a syringe filter and evaporated to dryness. The isolated metaphosphate TBA – salts were isolated as white solids and could be stored for months in the fridge.

The metaphosphate / TBA – ratios were determined by the addition of tetramethylphosphonium bromide and qNMR measurements. The TBA-amounts were usually higher than expected according to phosphate units present. We hypothesize the surplus TBA-ions are part of hydroxide salts. Consequently, the following molecular weights were determined:

**Trimetaphosphate (68, DowexH<sup>+</sup>):** 3MP x 3.9 TBA (MW = 1194 g/mol)

**Tetrametaphosphate (69, Chelex<sup>®</sup>TBA<sup>+</sup>):** 4MP x 6.0 TBA (MW = 1803 g/mol)

**Pentametaphosphate (70, Chelex<sup>®</sup>TBA<sup>+</sup>):** 5MP x 5.3 TBA (MW = 1683 g/mol)

**Heptametaphosphate (71, Chelex<sup>®</sup>TBA<sup>+</sup>):** 7MP x 8.2 TBA (MW = 2559 g/mol)

**Octametaphosphate (72, Chelex<sup>®</sup>TBA<sup>+</sup>):** 8MP x 11.3 TBA. (MW = 3424 g/mol)

## 7.2. Synthesis of arylpolyphosphates

### General procedure D for the synthesis of arylpolyphosphates:

The cyclophosphate x TBA salt (100  $\mu$ mol) was dissolved in dry MeCN (ca. 70 mM) and the corresponding aryne-precursor (4.0 – 5.0 eq.) was added. Subsequently, TBAF (1 M in THF, 5.0 eq.) was added dropwise via syringe pump (1 h, rt, needle tip is below solvent surface). The reaction mixture was stirred for additional 15 min at rt before the amine-nucleophile (2.5 – 20 eq.) was added. The resulting solution was stirred 24 - 48 h, and the crude product was precipitated by pipetting the reaction mixture into a NaClO<sub>4</sub>-solution (0.5 M in acetone, -20°C, 35 mL). The suspension was incubated for 20 min at -20°C and the precipitate was separated by centrifugation. The resulting pellet was washed with acetone (30 mL) and dried over high vacuum.

#### *Purification method D1:*

The crude product was purified by automated SAX (Äkta system, Q-Sepharose, NaClO<sub>4</sub>-buffer). Product containing fractions (80 – 150 mM) were combined and lyophilized. The resulting solid was washed with acetone (3 x 30 mL), separated by centrifugation and dried over high vacuum. The products were isolated as Na – salts.

#### *Purification method D2:*

The crude product was purified by automated RP-MPLC (Interchim system, C18-AQ, H<sub>2</sub>O/MeCN/TEAA [10 mM]). The product containing fractions were combined and lyophilized. The products were isolated as TEA – salts.

**PhenylP<sub>3</sub>-propargylamidate (78)**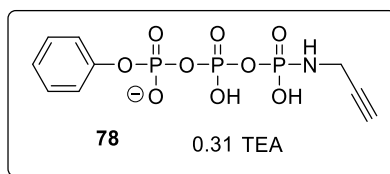

The compound was synthesized according to the general procedure D from trimetaphosphate x 3.9 TBA (**68**, 119 mg, 100  $\mu$ mol) and 2-(Trimethylsilyl)phenyl-trifluoromethanesulfonate (**1**, 121  $\mu$ L, 149 mg, 500  $\mu$ mol, 5.0 eq.). Propargylamine (16.0  $\mu$ L, 13.8 mg, 250  $\mu$ mol, 2.5 eq.) was applied for nucleophilic ring-opening (24 h). The crude product was purified according to purification method D2. The product (**78**, 32.6 mg, 68.7  $\mu$ mol, 69%) was isolated as colorless oil.

**<sup>1</sup>H-NMR** (400 MHz, D<sub>2</sub>O,  $\delta$ /ppm): 7.45 – 7.39 (m, 2H), 7.33 – 7.27 (m, 2H), 7.25 – 7.19 (m, 1H), 3.66 (dd,  $J = 9.9, 2.5$  Hz, 2H), 3.21 (q,  $J = 7.3$  Hz, 2H), 2.55 (t,  $J = 2.5$  Hz, 1H), 1.29 (t,  $J = 7.4$  Hz, 3H). **<sup>13</sup>C{<sup>1</sup>H}-NMR** (101 MHz, D<sub>2</sub>O,  $\delta$ /ppm): 151.75 (d,  $J = 7.2$  Hz), 129.68, 124.33 (d,  $J = 1.4$  Hz), 120.59 (d,  $J = 4.6$  Hz), 82.96 (d,  $J = 11.7$  Hz), 71.35, 46.64, 30.96, 8.20. **<sup>31</sup>P{<sup>1</sup>H}-NMR** (162 MHz, D<sub>2</sub>O,  $\delta$ /ppm): -2.83 (d,  $J = 20.6$  Hz), -15.91 (d,  $J = 19.8$  Hz), -23.02 (t,  $J = 20.1$  Hz). **HRMS** (ESI)  $m/z$  for C<sub>9</sub>H<sub>11</sub>NO<sub>9</sub>P<sub>3</sub> [M-H]<sup>-</sup>: calcd. 369.9652, found 369.9652.

**PhenylP<sub>3</sub>-amidate (79)**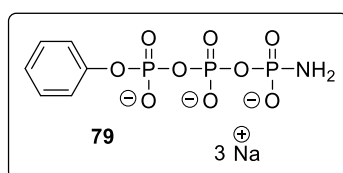

The compound was synthesized according to the general procedure D from trimetaphosphate x 3.9 TBA (**68**, 119 mg, 100  $\mu$ mol) and 2-(Trimethylsilyl)phenyl-trifluoromethanesulfonate (**1**, 121  $\mu$ L, 149 mg, 500  $\mu$ mol, 5.0 eq.). Aqu. NH<sub>3</sub> (25%, 17.0  $\mu$ L, 250  $\mu$ mol, 2.5 eq.) was applied for nucleophilic ring-opening (24 h). The crude product was purified according to purification method D1. The product (**79**, 26.7 mg, 66.9  $\mu$ mol, 67%) was isolated as white solid.

**<sup>1</sup>H-NMR** (400 MHz, D<sub>2</sub>O,  $\delta$ /ppm): 7.47 – 7.40 (m, 2H), 7.33 – 7.28 (m, 2H), 7.27 – 7.21 (m, 1H). **<sup>13</sup>C{<sup>1</sup>H}-NMR** (101 MHz, D<sub>2</sub>O,  $\delta$ /ppm): 151.70 (d,  $J = 7.2$  Hz), 129.72, 124.44 (d,  $J = 1.5$  Hz), 120.61 (d,  $J = 4.5$  Hz). **<sup>31</sup>P{<sup>1</sup>H}-NMR** (162 MHz, D<sub>2</sub>O,  $\delta$ /ppm): -1.03 (d,  $J = 19.1$  Hz), -

15.76 (d,  $J = 19.9$  Hz), -22.68 (t,  $J = 19.4$  Hz). **HRMS** (ESI)  $m/z$  for  $C_6H_9NO_9NP_3$   $[M-H]^-$ : calcd. 331.9496, found 331.9493.

### PhenylP<sub>3</sub>-anthracen-9-ylmethanamidate (**80**)

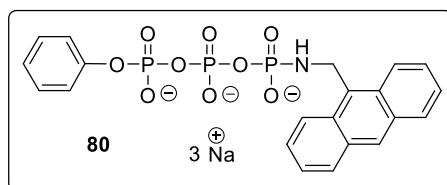

The compound was synthesized according to the general procedure D from trimetaphosphate x 3.9 TBA (**68**, 119 mg, 100  $\mu$ mol) and 2-(Trimethylsilyl)phenyl-trifluoromethanesulfonate (**1**, 121  $\mu$ L, 149 mg, 500  $\mu$ mol, 5.0 eq.). Anthracen-9-ylmethanamine (51.3 mg, 250  $\mu$ mol, 2.5 eq.) was applied for nucleophilic ring-opening (24 h). The crude product was purified according to purification method D1. The product (**80**, 27.1 mg, 46.0  $\mu$ mol, 46%) was isolated as white solid.

**<sup>1</sup>H-NMR** (400 MHz, D<sub>2</sub>O,  $\delta$ /ppm): 8.56 (s, 1H), 8.51 (dd,  $J = 8.9, 1.0$  Hz, 2H), 8.11 (ddd,  $J = 8.4, 1.6, 0.8$  Hz, 2H), 7.63 (ddd,  $J = 8.9, 6.5, 1.5$  Hz, 2H), 7.57 (ddd,  $J = 7.8, 6.6, 1.1$  Hz, 2H), 7.29 – 7.22 (m, 2H), 7.20 – 7.13 (m, 2H), 6.96 – 6.89 (m, 1H), 4.98 (s, 2H). **<sup>13</sup>C{<sup>1</sup>H}-NMR** (101 MHz, D<sub>2</sub>O,  $\delta$ /ppm): 151.76 (d,  $J = 7.2$  Hz), 131.27 (d,  $J = 12.7$  Hz), 131.27, 129.61, 129.49, 128.80, 127.28, 126.57, 125.41, 124.47, 123.99, 120.35 (d,  $J = 4.7$  Hz), 37.82. **<sup>31</sup>P{<sup>1</sup>H}-NMR** (162 MHz, D<sub>2</sub>O,  $\delta$ /ppm): -2.15 (d,  $J = 21.2$  Hz), -15.91 (d,  $J = 19.4$  Hz), -22.67 (t,  $J = 21.2$  Hz). **HRMS** (ESI)  $m/z$  for  $C_{21}H_{18}NO_9P_3$   $[M-H_2]^{2-}$ : calcd. 260.5102, found 260.5102.

### PhenylP<sub>3</sub>-5'-deoxyadenosyl-5'-amidate (**81**)

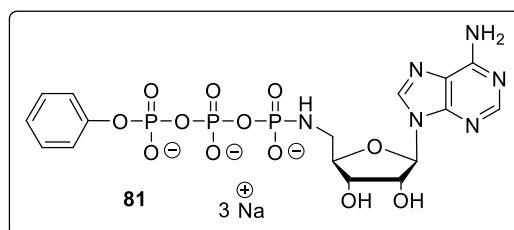

The compound was synthesized according to the general procedure D from trimetaphosphate x 3.9 TBA (**68**, 119 mg, 100  $\mu$ mol) and 2-(Trimethylsilyl)phenyl-trifluoromethanesulfonate (**1**, 121  $\mu$ L, 149 mg, 500  $\mu$ mol, 5.0 eq.). Nucleophilic ring-opening was induced by dropping the reaction mixture into a solution of 5'-Deoxy-5'-aminoadenosine (**SI-1**, 66.5 mg, 250  $\mu$ mol, 2.5 eq.) and DBU (74.5  $\mu$ L, 76.0 mg, 500  $\mu$ mol, 5.0 eq.) in DMF

(1.5 mL). The resulting solution was stirred for 48 h. The crude product was purified according to purification method D1. The product (**81**, 34.5 mg, 53.2  $\mu\text{mol}$ , 53%) was isolated as white solid.

**$^1\text{H-NMR}$**  (400 MHz,  $\text{D}_2\text{O}$ ,  $\delta/\text{ppm}$ ): 8.33 (s, 1H), 8.23 (d,  $J = 0.5$  Hz, 1H), 7.24 – 7.17 (m, 2H), 7.12 (dddd,  $J = 7.9, 1.9, 1.3, 0.5$  Hz, 2H), 7.00 (dp,  $J = 7.0, 0.8$  Hz, 1H), 5.98 (d,  $J = 6.4$  Hz, 1H), 4.78 – 4.75 (m, 1H), 4.41 (dd,  $J = 5.4, 3.3$  Hz, 1H), 4.22 (q,  $J = 3.4$  Hz, 1H), 3.34 – 3.17 (m, 2H).  **$^{13}\text{C}\{^1\text{H}\}\text{-NMR}$**  (101 MHz,  $\text{D}_2\text{O}$ ,  $\delta/\text{ppm}$ ): 155.51, 152.79, 151.51 (d,  $J = 7.1$  Hz), 148.87, 140.21, 129.32, 123.98, 120.27 (d,  $J = 4.6$  Hz), 118.90, 87.11, 85.44 (d,  $J = 8.9$  Hz), 73.27, 70.79, 43.14.  **$^{31}\text{P}\{^1\text{H}\}\text{-NMR}$**  (162 MHz,  $\text{D}_2\text{O}$ ,  $\delta/\text{ppm}$ ): -1.58 (d,  $J = 21.0$  Hz), -15.79 (d,  $J = 19.0$  Hz), -22.78 (t,  $J = 19.2$  Hz). **HRMS** (ESI)  $m/z$  for  $\text{C}_{16}\text{H}_{20}\text{N}_6\text{O}_{12}\text{P}_3$  [ $\text{M-H}$ ]: calcd. 581.0358, found 581.0361.

### Phenyl $\text{P}_3$ -5'-deoxyguanosyl-5'-amidate (**82**)

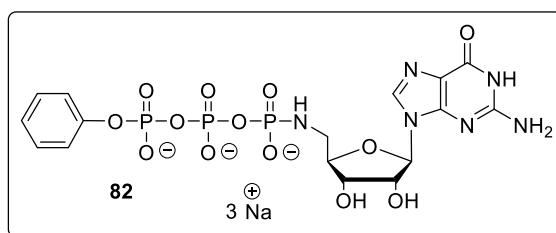

The compound was synthesized according to the general procedure D from trimetaphosphate x 3.9 TBA (**68**, 119 mg, 100  $\mu\text{mol}$ ) and 2-(Trimethylsilyl)phenyl-trifluoromethanesulfonate (**1**, 121  $\mu\text{L}$ , 149 mg, 500  $\mu\text{mol}$ , 5.0 eq.). Nucleophilic ring-opening was induced by dropping the reaction mixture into a solution of 5'-Deoxy-5'-aminoguanosine (**SI-2**, 56.4 mg, 200  $\mu\text{mol}$ , 2.0 eq.) in DMSO/DMF (1/1, 1.5 mL) and stirring the resulting solution for 48 h. The crude product was purified according to purification method D1. The product (**82**, 43.9 mg, 66.1  $\mu\text{mol}$ , 66%) was isolated as white solid.

**$^1\text{H-NMR}$**  (400 MHz,  $\text{D}_2\text{O}$ ,  $\delta/\text{ppm}$ ): 7.83 (s, 1H), 7.17 – 7.02 (m, 4H), 6.91 (ddt,  $J = 7.3, 6.3, 1.3$  Hz, 1H), 5.73 (d,  $J = 8.1$  Hz, 1H), 5.17 (dd,  $J = 8.0, 5.5$  Hz, 1H), 4.45 (dd,  $J = 5.5, 1.4$  Hz, 1H), 4.33 – 4.28 (m, 1H), 3.38 (ddd,  $J = 14.1, 5.0, 3.0$  Hz, 1H), 3.25 (ddd,  $J = 14.1, 9.3, 2.5$  Hz, 1H).  **$^{13}\text{C}\{^1\text{H}\}\text{-NMR}$**  (101 MHz,  $\text{D}_2\text{O}$ ,  $\delta/\text{ppm}$ ): 159.37, 153.76, 151.50 (d,  $J = 7.0$  Hz), 151.26, 139.68, 129.07, 123.68, 120.16 (d,  $J = 4.5$  Hz), 117.25, 88.70, 86.60 (d,  $J = 9.8$  Hz), 71.47, 71.07, 43.36.  **$^{31}\text{P}\{^1\text{H}\}\text{-NMR}$**  (162 MHz,  $\text{D}_2\text{O}$ ,  $\delta/\text{ppm}$ ): -1.59 (d,  $J = 22.9$  Hz), -15.76 (d,  $J = 19.2$  Hz), -22.87 (dd,  $J = 22.6, 19.5$  Hz). **HRMS** (ESI)  $m/z$  for  $\text{C}_{16}\text{H}_{20}\text{N}_6\text{O}_{13}\text{P}_3$  [ $\text{M-H}$ ]: calcd. 597.0307, found 597.0309.

**Napht-2-ylP<sub>3</sub>-5'-deoxyguanosyl-5'-amidate (83)**

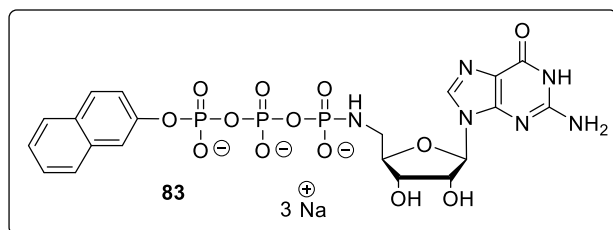

The compound was synthesized according to the general procedure D from trimetaphosphate x 3.9 TBA (**68**, 119 mg, 100  $\mu$ mol) and 3-(Trimethylsilyl)naphthalen-2-yl trifluoromethanesulfonate (**SI-12**, 174 mg, 500  $\mu$ mol, 5.0 eq.). Nucleophilic ring-opening was induced by dropping the reaction mixture into a solution of 5'-Deoxy-5'-aminoguanosine (**SI-2**, 56.4 mg, 200  $\mu$ mol, 2.0 eq.) in DMSO/DMF (1/1, 1.5 mL) and stirring the resulting solution for 48 h. The crude product was purified according to purification method D2 and D1 subsequently. The product (**83**, 34.9 mg, 48.9  $\mu$ mol, 49%) was isolated as white solid.

**<sup>1</sup>H-NMR** (400 MHz, D<sub>2</sub>O,  $\delta$ /ppm): 7.69 (d,  $J = 9.1$  Hz, 1H), 7.67 (s, 1H), 7.65 – 7.57 (m, 2H), 7.55 (d,  $J = 2.1$  Hz, 1H), 7.34 – 7.30 (m, 1H), 7.29 – 7.22 (m, 2H), 5.64 (d,  $J = 8.0$  Hz, 1H), 5.02 (dd,  $J = 7.9, 5.5$  Hz, 1H), 4.40 (dd,  $J = 5.5, 1.5$  Hz, 1H), 4.33 (t,  $J = 2.3$  Hz, 1H), 3.48 (ddd,  $J = 14.0, 4.1, 2.9$  Hz, 1H), 3.29 (ddd,  $J = 14.0, 9.1, 2.4$  Hz, 1H). **<sup>13</sup>C{<sup>1</sup>H}-NMR** (101 MHz, D<sub>2</sub>O,  $\delta$ /ppm): 158.22, 152.77, 150.69, 149.24 (d,  $J = 7.6$  Hz), 139.30, 133.25, 129.81, 129.03, 127.10 (d,  $J = 3.3$  Hz), 125.95, 124.87, 120.85, 120.81, 116.71, 116.37 (d,  $J = 4.8$  Hz), 88.80, 86.52 (d,  $J = 10.5$  Hz), 71.43, 71.07, 43.43. **<sup>31</sup>P{<sup>1</sup>H}-NMR** (162 MHz, D<sub>2</sub>O,  $\delta$ /ppm): -1.35 (d,  $J = 23.0$  Hz), -15.81 (d,  $J = 20.1$  Hz), -22.43 (dd,  $J = 23.0, 20.0$  Hz). **HRMS** (ESI)  $m/z$  for C<sub>20</sub>H<sub>21</sub>N<sub>6</sub>NaO<sub>13</sub>P<sub>3</sub> [M-H]<sup>-</sup>: calcd. 669.0283, found 669.0285.



**Pyren-2-ylP<sub>3</sub>-5'-deoxyadenosyl-5'-amidate (84)**

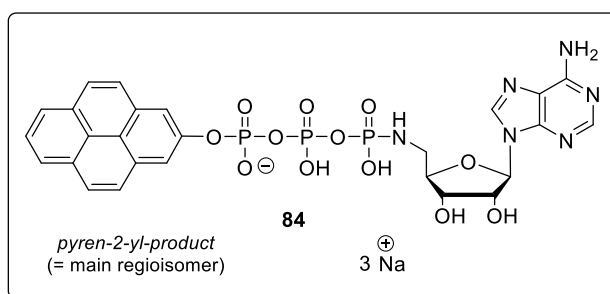

The compound was synthesized according to the general procedure D from trimetaphosphate x 3.9 TBA (**68**, 119 mg, 100  $\mu$ mol) and 1-(Trimethylsilyl)pyren-2-yl trifluoromethanesulfonate (**SI-19**, 212 mg, 500  $\mu$ mol, 5.0 eq.). Nucleophilic ring-opening was induced by dropping the reaction mixture into a solution of 5'-Deoxy-5'-aminoadenosine (**SI-1**, 66.5 mg, 250  $\mu$ mol, 2.5 eq.) and DBU (74.5  $\mu$ L, 76.0 mg, 500  $\mu$ mol, 5.0 eq.) in DMF (1.5 mL). The resulting solution was stirred for 48 h. The crude product was purified according to purification method D1. The product (**84**, 31.9 mg, 41.1  $\mu$ mol, 41%) was isolated as white solid.

The product is formed in an 88:12 (2-**84**:1-**84**) regioisomeric ratio. <sup>1</sup>H- and <sup>13</sup>C{<sup>1</sup>H}-NMR signals from the major product are given.

**<sup>1</sup>H-NMR** (400 MHz, D<sub>2</sub>O,  $\delta$ /ppm): 8.10 (d,  $J = 7.7$  Hz, 2H), 7.98 – 7.89 (m, 7H), 7.51 (s, 1H), 7.42 (s, 1H), 5.33 (d,  $J = 5.0$  Hz, 1H), 4.16 – 4.05 (m, 3H), 3.32 (ddd,  $J = 14.0, 7.0, 4.0$  Hz, 1H), 3.23 (ddd,  $J = 14.1, 9.5, 4.5$  Hz, 1H). **<sup>13</sup>C{<sup>1</sup>H}-NMR** (101 MHz, D<sub>2</sub>O,  $\delta$ /ppm): 153.85, 151.27, 149.50 (d,  $J = 6.8$  Hz), 146.99, 138.55, 131.74, 129.95, 127.74, 126.72, 125.65, 125.21, 123.16, 120.48, 117.41, 116.28 (d,  $J = 4.9$  Hz), 87.03, 84.38 (d,  $J = 9.7$  Hz), 73.90, 70.36, 43.29. **<sup>31</sup>P{<sup>1</sup>H}-NMR** (162 MHz, D<sub>2</sub>O,  $\delta$ /ppm): -1.62 (d,  $J = 22.0$  Hz), -15.82 (d,  $J = 19.9$  Hz), -22.75 (dd,  $J = 22.0, 19.2$  Hz). **HRMS** (ESI)  $m/z$  for C<sub>26</sub>H<sub>24</sub>N<sub>6</sub>O<sub>12</sub>P<sub>3</sub> [M-H]<sup>-</sup>: calcd. 705.0671, found 705.0677.

**Benzo[1,3]dioxol-5-ylP<sub>4</sub>-((7-(diethylamino)-2-oxo-2H-chromen-4-yl)methylamidate (85)**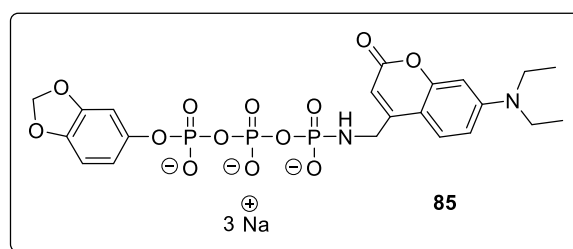

The compound was synthesized according to the general procedure D from trimetaphosphate x 3.9 TBA (**68**, 119 mg, 100  $\mu$ mol) and 6-(Trimethylsilyl)benzo[1,3]dioxol-5-yl trifluoromethanesulfonate (**SI-9**, 171 mg, 500  $\mu$ mol, 5.0 eq.). Amino-DEACM (**SI-26**, 61.3 mg, 250  $\mu$ mol, 2.5 eq.) was applied for nucleophilic ring-opening (24 h). The crude product was purified according to purification method D1. The product (**85**, 39.7 mg, 59.1  $\mu$ mol, 59%) was isolated as white solid.

**<sup>1</sup>H-NMR** (400 MHz, D<sub>2</sub>O,  $\delta$ /ppm): 7.35 (d,  $J$  = 9.1 Hz, 1H), 6.69 (dd,  $J$  = 9.2, 2.5 Hz, 1H), 6.67 (ddd,  $J$  = 2.4, 1.0, 0.5 Hz, 1H), 6.64 – 6.60 (m, 1H), 6.58 – 6.54 (m, 2H), 6.26 – 6.23 (m, 1H), 5.75 (s, 2H), 4.18 (dd,  $J$  = 8.6, 1.5 Hz, 2H), 3.44 (q,  $J$  = 7.1 Hz, 4H), 1.19 (t,  $J$  = 7.1 Hz, 6H). **<sup>13</sup>C{<sup>1</sup>H}-NMR** (101 MHz, D<sub>2</sub>O,  $\delta$ /ppm): 166.19, 158.12 (d,  $J$  = 9.7 Hz), 155.16, 151.02, 146.98, 146.27 (d,  $J$  = 7.6 Hz), 143.09, 125.03, 112.67 (d,  $J$  = 4.9 Hz), 109.95, 107.82, 106.89, 103.25, 102.57 (d,  $J$  = 4.7 Hz), 101.36, 96.95, 44.43, 41.71, 11.55. **<sup>31</sup>P{<sup>1</sup>H}-NMR** (162 MHz, D<sub>2</sub>O,  $\delta$ /ppm): -2.28 (d,  $J$  = 21.2 Hz), -15.87 (d,  $J$  = 20.0 Hz), -22.92 (t,  $J$  = 20.6 Hz). **HRMS** (ESI)  $m/z$  for C<sub>21</sub>H<sub>24</sub>N<sub>2</sub>O<sub>13</sub>P<sub>3</sub> [M-H]<sup>-</sup>: calcd. 605.0497, found 605.0500.

**Synthesis of PhenylP<sub>4</sub>-propargylamidate (86)**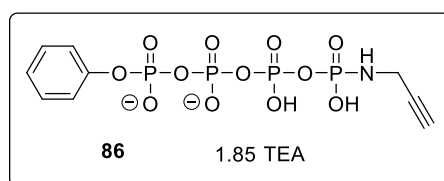

The compound was synthesized according to the general procedure D from tetrametaphosphate x 6.0 TBA (**69**, 180 mg, 100  $\mu$ mol) and 2-(Trimethylsilyl)phenyl-trifluoromethanesulfonate (**1**, 121  $\mu$ L, 149 mg, 500  $\mu$ mol, 5.0 eq.). Propargylamine (16.0  $\mu$ L, 13.8 mg, 250  $\mu$ mol, 2.5 eq.) was applied for nucleophilic ring-opening (24 h). The crude product was purified according to purification method D2. The product (**86**, 35.1 mg, 40.9  $\mu$ mol, 41%) was isolated as colorless oil.

**$^1\text{H-NMR}$**  (400 MHz,  $\text{D}_2\text{O}$ ,  $\delta/\text{ppm}$ ): 7.48 – 7.38 (m, 2H), 7.30 (dq,  $J = 7.7, 1.2$  Hz, 2H), 7.26 – 7.19 (m, 1H), 3.70 (dd,  $J = 10.2, 2.5$  Hz, 2H), 3.21 (q,  $J = 7.3$  Hz, 11H), 2.56 (t,  $J = 2.5$  Hz, 1H), 1.29 (t,  $J = 7.3$  Hz, 16H).  **$^{13}\text{C}\{^1\text{H}\}\text{-NMR}$**  (101 MHz,  $\text{D}_2\text{O}$ ,  $\delta/\text{ppm}$ ): 151.73 (d,  $J = 7.1$  Hz), 129.71, 124.36, 120.65 (d,  $J = 4.6$  Hz), 83.11 (d,  $J = 11.4$  Hz), 71.32, 46.64, 30.99, 8.21.  **$^{31}\text{P}\{^1\text{H}\}\text{-NMR}$**  (162 MHz,  $\text{D}_2\text{O}$ ,  $\delta/\text{ppm}$ ): -2.52 (d,  $J = 19.4$  Hz, 1P), -15.70 (d,  $J = 18.0$  Hz, 1P), -22.45 – -23.22 (m, 2P). **HRMS** (ESI)  $m/z$  for  $\text{C}_9\text{H}_{11}\text{NO}_{12}\text{P}_4$   $[\text{M-H}_2]^{2-}$ : calcd. 224.4621, found 224.4623.

### Pyren-2-ylP<sub>4</sub>-5'-deoxyguanosyl-5'-amidate (**87**)

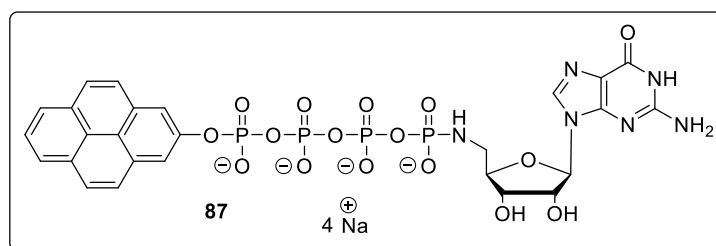

The compound was synthesized according to the general procedure D from tetrametaphosphate x 6.0 TBA (**69**, 180 mg, 100  $\mu\text{mol}$ ) and 1-(Trimethylsilyl)pyren-2-yl trifluoromethanesulfonate (**SI-19**, 212 mg, 500  $\mu\text{mol}$ , 5.0 eq.). Nucleophilic ring-opening was induced by dropping the reaction mixture into a solution of 5'-Deoxy-5'-aminoguanosine (**SI-2**, 56.4 mg, 200  $\mu\text{mol}$ , 2.0 eq.) in DMSO/DMF (1/1, 1.5 mL) and stirring the resulting solution for 48 h. The crude product was purified according to purification method D1. The product (**87**, 40.5 mg, 45.1  $\mu\text{mol}$ , 45%) was isolated white solid.

The product is formed in an 88:12 (2-**87**:1-**87**) regioisomeric ratio.  $^1\text{H}$ - and  $^{13}\text{C}\{^1\text{H}\}\text{-NMR}$  signals from the major product are given.

**$^1\text{H-NMR}$**  (400 MHz,  $\text{D}_2\text{O}$ ,  $\delta/\text{ppm}$ ): 8.10 – 7.92 (m, 8H), 7.90 – 7.83 (m, 1H), 7.20 (s, 1H), 5.21 (d,  $J = 7.6$  Hz, 1H), 4.55 (dd,  $J = 7.7, 5.4$  Hz, 1H), 4.17 (dd,  $J = 5.5, 1.7$  Hz, 1H), 4.12 (q,  $J = 2.5$  Hz, 1H), 3.33 (dt,  $J = 14.0, 3.7$  Hz, 1H), 3.15 (ddd,  $J = 14.0, 9.3, 2.5$  Hz, 1H).  **$^{13}\text{C}\{^1\text{H}\}\text{-NMR}$**  (101 MHz,  $\text{D}_2\text{O}$ ,  $\delta/\text{ppm}$ ): 157.23, 151.96, 149.79, 149.67 (d,  $J = 7.4$  Hz), 138.26, 131.98, 130.02, 127.95, 126.88, 125.63, 125.13, 123.25, 120.75, 116.61 (d,  $J = 4.6$  Hz), 115.70, 88.34, 85.98 (d,  $J = 10.4$  Hz), 71.49, 71.23, 43.01.  **$^{31}\text{P}\{^1\text{H}\}\text{-NMR}$**  (162 MHz,  $\text{D}_2\text{O}$ ,  $\delta/\text{ppm}$ ): -1.08 (d,  $J = 22.3$  Hz), -15.45 (d,  $J = 18.0$  Hz), -21.99 (dd,  $J = 22.2, 13.9$  Hz), -22.59 (dd,  $J = 17.8, 13.8$  Hz). **HRMS** (ESI)  $m/z$  for  $\text{C}_{26}\text{H}_{23}\text{N}_6\text{O}_{16}\text{P}_4$   $[\text{M-H}_3]^{3-}$ : calcd. 266.3379, found 266.3379.

### Synthesis of PhenylP<sub>4</sub>-5'-deoxyguanosyl-5'-amidate (**88**)

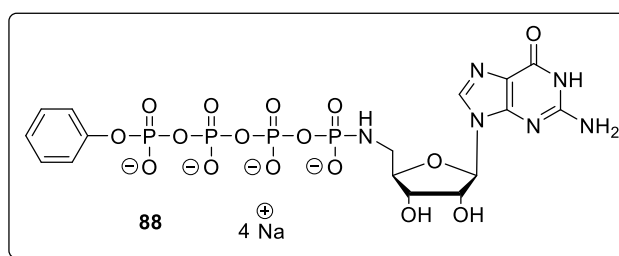

The compound was synthesized according to the general procedure D from tetrametaphosphate x 6.0 TBA (**69**, 180 mg, 100  $\mu$ mol) and 2-(Trimethylsilyl)phenyl-trifluoromethanesulfonate (**1**, 121  $\mu$ L, 149 mg, 500  $\mu$ mol, 5.0 eq.). Nucleophilic ring-opening was induced by dropping the reaction mixture into a solution of 5'-Deoxy-5'-aminoguanosine (**SI-2**, 56.4 mg, 200  $\mu$ mol, 2.0 eq.) in DMSO/DMF (1/1, 1.5 mL) and stirring the resulting solution for 48 h. The crude product was purified according to purification method D2 and D1 subsequently. The product (**88**, 32.6 mg, 42.5  $\mu$ mol, 43%) was isolated as white solid.

**<sup>1</sup>H-NMR** (400 MHz, D<sub>2</sub>O,  $\delta$ /ppm): 7.67 (s, 1H), 7.10 – 6.94 (m, 4H), 6.80 – 6.69 (m, 1H), 5.57 (d,  $J$  = 8.0 Hz, 1H), 4.97 (dd,  $J$  = 7.9, 5.5 Hz, 1H), 4.32 (dd,  $J$  = 5.5, 1.5 Hz, 1H), 4.17 – 4.09 (m, 1H), 3.23 – 3.04 (m, 2H). **<sup>13</sup>C{<sup>1</sup>H}-NMR** (101 MHz, D<sub>2</sub>O,  $\delta$ /ppm): 158.96, 153.47, 151.51 (d,  $J$  = 7.2 Hz), 151.27, 139.68, 129.29, 123.83, 120.36 (d,  $J$  = 4.3 Hz), 117.15, 88.68, 86.60 (d,  $J$  = 9.7 Hz), 71.40, 71.23, 43.17. **<sup>31</sup>P{<sup>1</sup>H}-NMR** (162 MHz, D<sub>2</sub>O,  $\delta$ /ppm): -1.22 (d,  $J$  = 21.1 Hz), -15.50 (d,  $J$  = 17.5 Hz), -22.29 (dd,  $J$  = 21.4, 15.2 Hz), -22.90 (dd,  $J$  = 17.9, 15.1 Hz). **HRMS** (ESI)  $m/z$  for C<sub>16</sub>H<sub>19</sub>N<sub>6</sub>O<sub>16</sub>P<sub>4</sub> [M-H<sub>3</sub>]<sup>3-</sup>: calcd. 224.9941, found 224.9942.

### 3,4-DimethylphenylP<sub>4</sub>-(7-(diethylamino)-2-oxo-2H-chromen-4-yl)methylamidate (**89**)

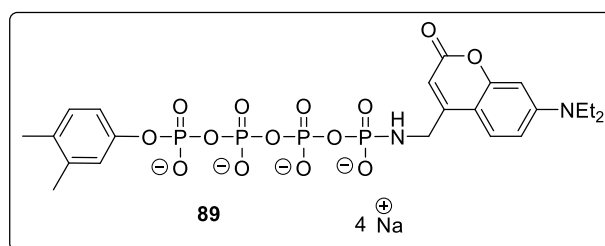

The compound was synthesized according to the general procedure D from tetrametaphosphate x 6.0 TBA (**69**, 180 mg, 100  $\mu$ mol) and 4,5-Dimethyl-2-(trimethylsilyl)phenyl-trifluoromethanesulfonate (**SI-6**, 163 mg, 500  $\mu$ mol, 5.0 eq.). Amino-DEACM (**SI-26**, 61.3 mg, 250  $\mu$ mol, 2.5 eq.) was applied for nucleophilic ring-opening (24 h). The crude product was purified according to purification method D1. The product (**89**, 16.6 mg, 22.0  $\mu$ mol, 22%) was isolated as white solid.

**$^1\text{H-NMR}$**  (400 MHz,  $\text{D}_2\text{O}$ ,  $\delta/\text{ppm}$ ): 7.34 (d,  $J = 9.1$  Hz, 1H), 6.68 (d,  $J = 1.4$  Hz, 2H), 6.66 (dd,  $J = 9.1, 2.6$  Hz, 1H), 6.61 (s, 1H), 6.48 (d,  $J = 2.5$  Hz, 1H), 6.05 (d,  $J = 1.2$  Hz, 1H), 4.11 (d,  $J = 8.9$  Hz, 2H), 3.37 (q,  $J = 7.0$  Hz, 4H), 1.85 (s, 3H), 1.82 (s, 3H), 1.12 (t,  $J = 7.1$  Hz, 6H).  **$^{13}\text{C}\{^1\text{H}\}\text{-NMR}$**  (101 MHz,  $\text{D}_2\text{O}$ ,  $\delta/\text{ppm}$ ): 166.32, 158.76 (d,  $J = 8.5$  Hz), 155.03, 151.04, 149.33, 137.94, 132.15, 129.87, 125.31, 120.77 (d,  $J = 5.1$  Hz), 116.92 (d,  $J = 4.2$  Hz), 110.15, 107.07, 103.17, 96.95, 44.44, 41.79, 18.68, 17.87, 11.61.  **$^{31}\text{P}\{^1\text{H}\}\text{-NMR}$**  (162 MHz,  $\text{D}_2\text{O}$ ,  $\delta/\text{ppm}$ ): -2.06 (d,  $J = 21.8$  Hz, 1P), -15.66 (d,  $J = 17.8$  Hz, 1P), -22.06 – -23.01 (m, 2P). **HRMS** (ESI)  $m/z$  for  $\text{C}_{22}\text{H}_{29}\text{N}_2\text{O}_{14}\text{P}_4$   $[\text{M-H}]^-$ : calcd. 669.0575, found 669.0579.

### Synthesis of PhenylP<sub>5</sub>-propargylamidate (**90**)

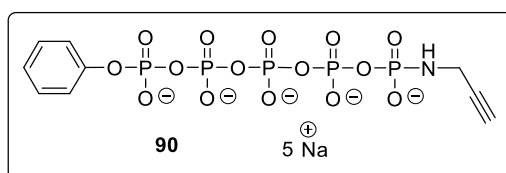

The compound was synthesized according to the general procedure D from pentametaphosphate x 5.3 TBA (**70**, 168 mg, 100  $\mu\text{mol}$ ) and 2-(Trimethylsilyl)phenyl-trifluoromethanesulfonate (**1**, 121  $\mu\text{L}$ , 149 mg, 500  $\mu\text{mol}$ , 5.0 eq.). Propargylamine (64.0  $\mu\text{L}$ , 55.0 mg, 1.00 mmol, 10 eq.) was applied for nucleophilic ring-opening (48 h). The crude product was purified according to purification method D1. The product (**90**, 15.2 mg, 23.1  $\mu\text{mol}$ , 23%) was isolated as white solid.

**$^1\text{H-NMR}$**  (400 MHz,  $\text{D}_2\text{O}$ ,  $\delta/\text{ppm}$ ): 7.47 – 7.39 (m, 2H), 7.34 – 7.27 (m, 2H), 7.26 – 7.20 (m, 1H), 3.73 (dd,  $J = 10.7, 2.4$  Hz, 2H), 2.57 (td,  $J = 2.5, 0.5$  Hz, 1H).  **$^{13}\text{C}\{^1\text{H}\}\text{-NMR}$**  (101 MHz,  $\text{D}_2\text{O}$ ,  $\delta/\text{ppm}$ ): 151.70 (d,  $J = 7.2$  Hz), 129.71, 124.39 (d,  $J = 1.4$  Hz), 120.68 (d,  $J = 4.4$  Hz), 68.14, 30.95.  **$^{31}\text{P}\{^1\text{H}\}\text{-NMR}$**  (162 MHz,  $\text{D}_2\text{O}$ ,  $\delta/\text{ppm}$ ): -2.34 (d,  $J = 19.7$  Hz, 1P), -15.55 (d,  $J = 16.9$  Hz, 1P), -21.84 – -23.03 (m, 3P). **HRMS** (ESI)  $m/z$  for  $\text{C}_9\text{H}_{13}\text{NO}_{15}\text{P}_5$   $[\text{M-H}]^-$ : calcd. 529.8979, found 529.8980.

### Synthesis of PhenylP<sub>7</sub>-propargylamidate (**91**)

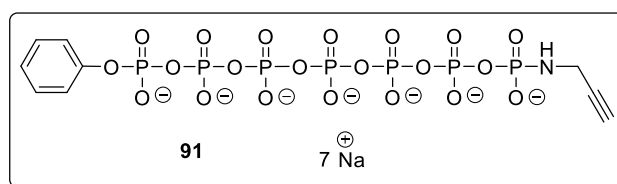

The compound was synthesized according to the general procedure D from heptametaphosphate x 8.2 TBA (**71**, 255 mg, 100  $\mu$ mol) and 2-(Trimethylsilyl)phenyl-trifluoromethanesulfonate (**1**, 96.9  $\mu$ L, 119 mg, 400  $\mu$ mol, 4.0 eq.). Propargylamine (64.0  $\mu$ L, 55.0 mg, 1.0 mmol, 10 eq.) was applied for nucleophilic ring-opening (48 h). The crude product was purified according to purification method D1. The product (**91**, 30.9 mg, 36.6  $\mu$ mol, 37%) was isolated as white solid.

**<sup>1</sup>H-NMR** (400 MHz, D<sub>2</sub>O,  $\delta$ /ppm): 7.51 – 7.40 (m, 2H), 7.36 – 7.31 (m, 2H), 7.30 – 7.24 (m, 1H), 3.76 (dd,  $J = 10.8, 2.5$  Hz, 2H), 2.64 (t,  $J = 2.5$  Hz, 1H). **<sup>13</sup>C{<sup>1</sup>H}-NMR** (101 MHz, D<sub>2</sub>O,  $\delta$ /ppm): 151.66 (d,  $J = 7.3$  Hz), 129.80, 124.56, 120.67 (d,  $J = 4.5$  Hz), 83.09 (d,  $J = 10.6$  Hz), 71.49, 30.30. **<sup>31</sup>P{<sup>1</sup>H}-NMR** (162 MHz, D<sub>2</sub>O,  $\delta$ /ppm): -1.83 – -2.25 (m, 1P), -15.33 (d,  $J = 17.7$  Hz, 1P), -21.62 – -22.03 (m, 4P), -22.20 (dd,  $J = 17.7, 13.7$  Hz, 1P). **HRMS** (ESI)  $m/z$  for C<sub>9</sub>H<sub>15</sub>NO<sub>21</sub>P<sub>7</sub> [M-H]<sup>-</sup>: calcd. 689.8305, found 689.8306.

### Synthesis of PhenylP<sub>8</sub>-propargylamidate (**92**)

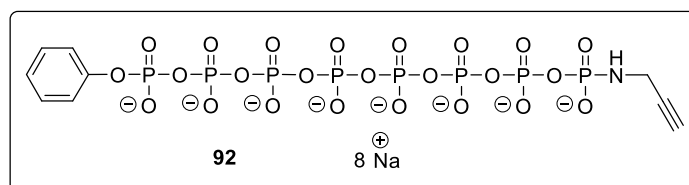

The compound was synthesized according to the general procedure D from octametaphosphate x 11.3 TBA (**72**, 342 mg, 100  $\mu$ mol) and 2-(Trimethylsilyl)phenyl-trifluoromethanesulfonate (**1**, 96.9  $\mu$ L, 119 mg, 400  $\mu$ mol, 4.0 eq.). Propargylamine (64.0  $\mu$ L, 55.0 mg, 1.0 mmol, 10 eq.) was applied for nucleophilic ring-opening (48 h). The crude product was purified according to purification method D1. The product (**92**, 21.2 mg, 22.4  $\mu$ mol, 22%) was isolated as white solid.

**<sup>1</sup>H-NMR** (400 MHz, D<sub>2</sub>O,  $\delta$ /ppm): 7.47 – 7.39 (m, 2H), 7.30 (dq,  $J = 7.8, 1.2$  Hz, 2H), 7.26 – 7.20 (m, 1H), 3.73 (dd,  $J = 10.7, 2.5$  Hz, 2H), 2.60 (t,  $J = 2.5$  Hz, 1H). **<sup>13</sup>C{<sup>1</sup>H}-NMR** (101 MHz, D<sub>2</sub>O,  $\delta$ /ppm): 151.65 (d,  $J = 7.3$  Hz), 129.73, 124.45, 120.65 (d,  $J = 4.6$  Hz), 71.38, 30.93. **<sup>31</sup>P{<sup>1</sup>H}-NMR** (162 MHz, D<sub>2</sub>O,  $\delta$ /ppm): -2.24 (d,  $J = 20.1$  Hz, 1P), -15.49 (d,  $J = 17.8$  Hz, 1P), -21.71 – -22.25 (m, 5P), -22.33 – -22.62 (m, 1P). **HRMS** (ESI)  $m/z$  for C<sub>9</sub>H<sub>15</sub>NO<sub>24</sub>P<sub>8</sub> [M-H]<sub>2</sub><sup>2-</sup>: calcd. 384.3948, found 384.3946.

### Phenyl-cyclotriphosphate as storable triphosphorylation reagent (**73**)

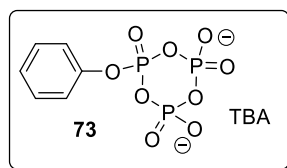

The cyclophosphate x TBA salt (**68**, 100  $\mu\text{mol}$ ) was dissolved in dry MeCN (ca. 70 mM) and 2-(Trimethylsilyl)phenyl-trifluoro-methanesulfonate (**1**, 121  $\mu\text{L}$ , 149 mg, 500  $\mu\text{mol}$ , 5.0 eq.) (4.0 – 5.0 eq.) was added. Subsequently TBAF (1 M in THF, 5.0 eq.) was added dropwise via syringe pump (1 h, rt, needle tip is below solvent surface). Then, the reaction mixture is stirred for 15 min at rt. The product is precipitated with Et<sub>2</sub>O (40 mL) and the resulting oil is washed with Et<sub>2</sub>O (2 x 30 mL). The phenyl-cyclotriphosphate **73** is dried over high vacuum and can be stored as triphosphorylation reagent in the fridge for weeks without substantial decomposition. Furthermore, storage as solution in MeCN at rt is possible for weeks.

<sup>31</sup>P{<sup>1</sup>H}-NMR (162 MHz, CD<sub>3</sub>CN,  $\delta$ /ppm): -23.61 (d,  $J = 25.1$  Hz), -26.19 (t,  $J = 24.4$  Hz).  
 HRMS (ESI) m/z for C<sub>6</sub>H<sub>5</sub>O<sub>9</sub>P<sub>3</sub> [M-H<sub>2</sub>]<sup>2-</sup>: calcd. 156.9578, found 156.9579.

### Phenyl-cyclotetraphosphate as storable tetraphosphorylation reagent (**74**)

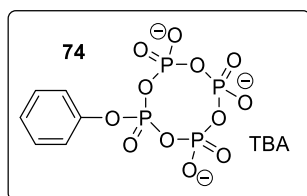

The cyclophosphate x TBA salt (**69**, 100  $\mu\text{mol}$ ) was dissolved in dry MeCN (ca. 70 mM) and 2-(Trimethylsilyl)phenyl-trifluoro-methanesulfonate (**1**, 121  $\mu\text{L}$ , 149 mg, 500  $\mu\text{mol}$ , 5.0 eq.) was added. Subsequently TBAF (1 M in THF, 5.0 eq.) was added dropwise via syringe pump (1 h, rt, needle tip is below solvent surface). Then, the reaction mixture is stirred for 15 min at rt. The product is precipitated with Et<sub>2</sub>O (40 mL) and the resulting oil is washed with Et<sub>2</sub>O (2 x 30 mL). The phenyl-cyclotetraphosphate **74** is dried over high vacuum and can be stored as tetraphosphorylation reagent in the fridge for weeks without substantial decomposition. Furthermore, storage as solution in MeCN at rt is possible for weeks.

<sup>31</sup>P{<sup>1</sup>H}-NMR (162 MHz, CD<sub>3</sub>CN,  $\delta$ /ppm): -25.03 – -25.65 (m, 3P), -29.37 – -29.89 (m, 1P).  
 HRMS (ESI) m/z for C<sub>6</sub>H<sub>7</sub>O<sub>12</sub>P<sub>4</sub> [M-H]<sup>-</sup>: calcd. 394.8893, found 394.8892.

## 8. Synthesis of phosphate starting materials without literature precedence

### **General procedure E for the synthesis of mono- and diphosphates**

Alcohol (or Monophosphate TBA-salt) and ETT were dissolved in DMF.  $(FmO)_2P-NiPr_2$  (**SI-4**) was added as solution in DMF and the resulting mixture was stirred for 1 h at rt. The solution was cooled to 0 °C and *m*CPBA (77%, 1.2 eq.) was added. The solution was stirred for 15 min at 0 °C and piperidine (10 vol%) was added. The solution was stirred for 40 min at rt.

#### *Purification method E1:*

The crude product was either precipitated with ether (40 mL), washed with ether (40 mL) and dried over high vac. Purification was performed by automated SAX (Äkta-system, Q-Sepharose,  $NH_4HCO_3$  – buffer). The product containing fractions were identified by NMR and the product was isolated after lyophilization.

#### *Purification method E2:*

The solvent was removed under reduced pressure. The crude product was purified by RP-MPLC [C18-AQ, dryload on celite, elution with  $H_2O/MeCN/TEAA$  (10 mM)]. The product containing fractions were identified by NMR or HPLC and the product was isolated after lyophilization.

Afterwards cations were exchanged to TBA by Dowex or Chelex before application in subsequent reactions.



**6-Hydroxyhexylphosphate (SI-13)**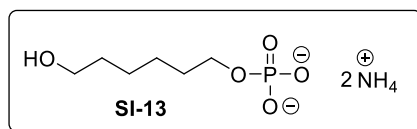

The compound was synthesized according to the general procedure E with 1,6-hexanediol (849 mg, 7.19 mmol, 5.0 eq.), (FmO)<sub>2</sub>P-NiPr<sub>2</sub> (**SI-14**, 750 mg, 1.44 mmol, 1.0 eq.), ETT (340 mg, 2.88 mmol, 2.0 eq.) and *m*CPBA (77%, 386 mg, 1.72 mmol, 1.2 eq.) in DMF (4.0 mL). Purification was performed by purification method E1 and the product (**SI-13**, 225 mg, 970 μmol, 67%) was isolated as white solid.

**<sup>1</sup>H-NMR** (400 MHz, D<sub>2</sub>O, δ/ppm): 3.82 (dt, *J* = 6.6 Hz, 2H), 3.59 (t, *J* = 6.6 Hz, 2H), 1.68 – 1.50 (m, 4H), 1.44 – 1.30 (m, 4H). **<sup>31</sup>P{<sup>1</sup>H}-NMR** (162 MHz, D<sub>2</sub>O, δ/ppm): 1.34. **<sup>13</sup>C{<sup>1</sup>H}-NMR** (101 MHz, D<sub>2</sub>O, δ/ppm): 65.48 (d, *J* = 5.4 Hz), 61.72, 31.15, 29.83 (d, *J* = 6.8 Hz), 24.68, 24.66. **HRMS** (ESI) *m/z* for C<sub>6</sub>H<sub>14</sub>O<sub>5</sub>P [M-H]<sup>-</sup>: calcd. 197.0584, found 197.0584.

**Geranylphosphate (SI-14)**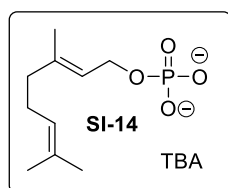

The compound was synthesized according to the general procedure E with Geraniol (210 mg, 236 μL, 1.36 mmol), (FmO)<sub>2</sub>P-NiPr<sub>2</sub> (**SI-4**, 782 mg, 1.50 mmol, 1.1 eq.), ETT (355 mg, 2.73 mmol, 2.0 eq.) and *m*CPBA (77%, 402 mg, 1.63 mmol, 1.2 eq.) in DMF (10 mL). Purification was performed by method E2 and the product (**SI-14**, 268 mg, 615 μmol, 45%) was isolated as 2.0 TEAA salt.

As the TEAA-salt was not stable in solution (decomposition by phosphate elimination) the cations were immediately changed to TBA by chelex.

**<sup>1</sup>H-NMR** (400 MHz, D<sub>2</sub>O, δ/ppm): 5.50 – 5.39 (m, 1H), 5.22 (tdd, *J* = 5.5, 2.9, 1.4 Hz, 1H), 4.37 (ddd, *J* = 7.2, 6.2, 0.8 Hz, 2H), 3.25 – 3.16 (m, 11H), 2.23 – 2.08 (m, 4H), 1.74 – 1.59 (m, 20H), 1.37 (h, *J* = 7.4 Hz, 11H), 0.95 (t, *J* = 7.4 Hz, 17H). **<sup>31</sup>P{<sup>1</sup>H}-NMR** (162 MHz, D<sub>2</sub>O, δ/ppm): 1.61. **<sup>13</sup>C{<sup>1</sup>H}-NMR** (101 MHz, D<sub>2</sub>O, δ/ppm): 142.18, 133.69, 124.13, 120.13 (d, *J* = 7.8 Hz), 61.74 (d, *J* = 4.9 Hz), 59.15 – 56.63 (m), 38.75, 25.56, 24.79, 23.11, 19.87 – 18.66 (m), 16.93, 15.46, 12.80. **HRMS** (ESI) *m/z* for C<sub>10</sub>H<sub>18</sub>O<sub>4</sub>P [M-H]<sup>-</sup>: calcd. 233.0948, found 233.0946.

**Isoprenylphosphate (SI-15)**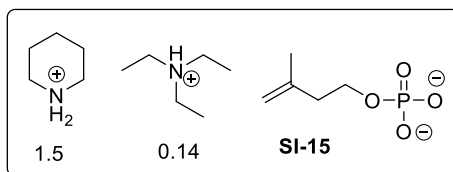

The compound was synthesized according to the general procedure E with Isoprenol (130 mg, 151  $\mu$ L, 1.51 mmol), (FmO)<sub>2</sub>P-NiPr<sub>2</sub> (**SI-4**, 1.02 g, 1.97 mmol, 1.3 eq.), ETT (491 mg, 3.78 mmol, 2.5 eq.) and *m*CPBA (77%, 724 mg, 2.95 mmol, 1.5 eq.) in DMF (5.0 mL). Purification was performed by purification method E2. The product (**SI-15**, 175 mg, 573  $\mu$ mol, 38%) was isolated as white solid.

**<sup>1</sup>H-NMR** (400 MHz, D<sub>2</sub>O,  $\delta$ /ppm): 4.89 – 4.86 (m, 1H), 4.84 – 4.82 (m, 1H), 3.99 (td,  $J = 6.7, 6.6$  Hz, 2H), 3.19 – 3.13 (m, 7H), 3.12 – 3.04 (m, 1H), 2.38 (d,  $J = 2549.5$  Hz, 1H), 1.85 – 1.71 (m, 10H), 1.70 – 1.63 (m, 3H), 1.27 (t,  $J = 7.3$  Hz, 1H). **<sup>13</sup>C{<sup>1</sup>H}-NMR** (101 MHz, D<sub>2</sub>O,  $\delta$ /ppm): 143.62, 111.52, 63.71 (d,  $J = 5.2$  Hz), 44.51, 37.92 (d,  $J = 7.2$  Hz), 27.12, 22.18, 21.55, 21.45, 14.47. **<sup>31</sup>P{<sup>1</sup>H}-NMR** (162 MHz, D<sub>2</sub>O,  $\delta$ /ppm): 0.49. **HRMS** (ESI)  $m/z$  for C<sub>5</sub>H<sub>10</sub>O<sub>4</sub>P [M-H]<sup>-</sup>: calcd. 165.0322, found 165.0323.

**Pentylphosphate (67)**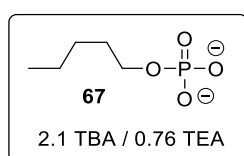

The compound was synthesized according to the general procedure E with pentan-1-ol (309 mg, 380  $\mu$ L, 3.52 mmol), (FmO)<sub>2</sub>P-NiPr<sub>2</sub> (**SI-4**, 2.02 g, 3.87 mmol, 1.1 eq.), ETT (916 mg, 7.04 mmol, 2.0 eq.) and *m*CPBA (77%, 1.13 g, 5.06 mmol, 1.4 eq.) in MeCN (15 mL). Purification was performed by purification method E2. Cations were directly changed to TBA. The product (**67**, 2.65 g, 3.52 mmol, quant) was isolated colorless oil. Redundant anions are assumed to be hydroxide.

**<sup>1</sup>H-NMR** (400 MHz, D<sub>2</sub>O,  $\delta$ /ppm): 3.85 (q,  $J = 6.7$  Hz, 2H), 3.23 – 3.04 (m, 21H), 1.69 – 1.53 (m, 19H), 1.42 – 1.25 (m, 26H), 0.92 (t,  $J = 7.4$  Hz, 25H), 0.89 – 0.84 (m, 3H). **<sup>13</sup>C{<sup>1</sup>H}-NMR** (101 MHz, D<sub>2</sub>O,  $\delta$ /ppm): 65.97 (d,  $J = 5.5$  Hz), 58.58 – 56.88 (m), 46.49, 29.55 (d,  $J = 6.8$  Hz), 27.15, 26.98, 23.07, 21.67, 19.24 – 18.75 (m), 14.36, 13.29, 12.80. **<sup>31</sup>P{<sup>1</sup>H}-NMR** (162 MHz, D<sub>2</sub>O,  $\delta$ /ppm): 0.46. **HRMS** (ESI)  $m/z$  for C<sub>5</sub>H<sub>12</sub>O<sub>4</sub>P [M-H]<sup>-</sup>: calcd. 167.0479, found 167.0480.

**5,5,5-Trifluoropentylphosphate (38)**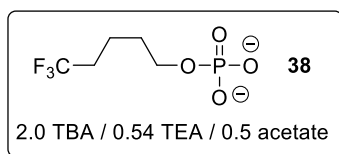

The compound was synthesized according to the general procedure E with 5,5,5-trifluoropentanol (500 mg, 370  $\mu\text{L}$ , 3.52 mmol),  $(\text{FmO})_2\text{P-NiPr}_2$  (**SI-4**, 2.02 g, 3.87 mmol, 1.1 eq.), ETT (916 mg, 7.04 mmol, 2.0 eq.) and *m*CPBA (77%, 1.13 g, 5.06 mmol, 1.4 eq.) in MeCN (15 mL). Purification was performed by purification method E2. Cations were directly changed to TBA. The product (**38**, 2.28 g, 2.97 mmol, 84%) was isolated as colorless oil.

**$^1\text{H-NMR}$**  (400 MHz,  $\text{D}_2\text{O}$ ,  $\delta/\text{ppm}$ ): 3.88 (q,  $J = 6.3$  Hz, 2H), 3.19 – 3.10 (m, 19H), 2.31 – 2.13 (m, 2H), 1.77 – 1.53 (m, 20H), 1.41 – 1.27 (m, 21H), 0.93 (t,  $J = 7.6$  Hz, 24H).  **$^{13}\text{C}\{^1\text{H}\}\text{-NMR}$**  (101 MHz,  $\text{D}_2\text{O}$ ,  $\delta/\text{ppm}$ ): 127.62 (q,  $J = 275.8$  Hz), 65.11 (d,  $J = 5.4$  Hz), 59.59 – 57.42 (m), 46.48, 32.32 (q,  $J = 27.9$  Hz), 28.86 (d,  $J = 7.1$  Hz), 26.99, 23.08, 17.82 (q,  $J = 3.3$  Hz), 14.32, 12.79.  **$^{19}\text{F-NMR}$**  (377 MHz,  $\text{D}_2\text{O}$ ,  $\delta/\text{ppm}$ ): -66.06 (t,  $J = 11.4$  Hz).  **$^{31}\text{P}\{^1\text{H}\}\text{-NMR}$**  (162 MHz,  $\text{D}_2\text{O}$ ,  $\delta/\text{ppm}$ ): 0.41. **HRMS** (ESI)  $m/z$  for  $\text{C}_5\text{H}_9\text{F}_3\text{O}_4\text{P} [\text{M-H}]^-$ : calcd. 221.0196, found 221.0196.

**Phenylpyrophosphate (SI-16)**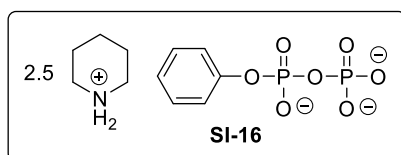

The compound was synthesized according to the general procedure E with phenylphosphate x 1.0 TBA (800 mg, 1.93 mmol),  $(\text{FmO})_2\text{P-NiPr}_2$  (**SI-4**, 1.11 g, 2.13 mmol, 1.1 eq.), ETT (570 mg, 4.83 mmol, 2.5 eq.) and *m*CPBA (77%, 691 mg, 3.09 mmol, 1.6 eq.) in DMF (10 mL). The compound was purified according to the general procedure E2. The product (**SI-16**, 445 mg, 989  $\mu\text{mol}$ , 51%) was isolated as white solid.

**$^1\text{H-NMR}$**  (400 MHz,  $\text{D}_2\text{O}$ ,  $\delta/\text{ppm}$ ): 7.45 – 7.38 (m, 2H), 7.29 – 7.25 (m, 2H), 7.24 – 7.20 (m, 1H), 3.21 – 3.11 (m, 10H), 1.83 – 1.73 (m, 10H), 1.73 – 1.59 (m, 5H).  **$^{13}\text{C}\{^1\text{H}\}\text{-NMR}$**  (101 MHz,  $\text{D}_2\text{O}$ ,  $\delta/\text{ppm}$ ): 151.79 (d,  $J = 7.2$  Hz), 129.65, 124.30 (d,  $J = 1.4$  Hz), 120.55 (d,  $J = 4.3$  Hz), 44.50, 22.18, 21.45.  **$^{31}\text{P}\{^1\text{H}\}\text{-NMR}$**  (162 MHz,  $\text{D}_2\text{O}$ ,  $\delta/\text{ppm}$ ): -10.80 (d,  $J = 21.0$  Hz), -15.71 (d,  $J = 20.9$  Hz). **HRMS** (ESI)  $m/z$  for  $\text{C}_6\text{H}_7\text{O}_7\text{P}_2 [\text{M-H}]^-$ : calcd. 252.9672, found 252.9674.

**D4T-diphosphate (SI-17)**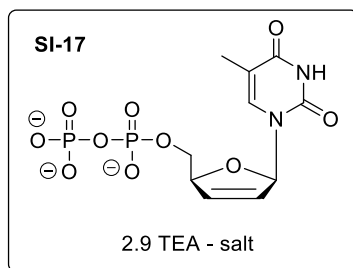

The compound was synthesized according to the general procedure E with d4T-monophosphate x 1.4 TBA (**SI-5**, 275 mg, 426  $\mu\text{mol}$ ),  $(\text{FmO})_2\text{P-NiPr}_2$  (**SI-4**, 288 mg, 554  $\mu\text{mol}$ , 1.3 eq.), ETT (139 mg, 1.07 mmol, 2.5 eq.) and *m*CPBA (77%, 204 mg, 913  $\mu\text{mol}$ , 2.1 eq.) in DMF (10 mL). The crude product was precipitated with ether and subsequently purified according to the general procedure E2. The product (**SI-17**, 177 mg, 263  $\mu\text{mol}$ , 62%) was isolated as white solid.

**$^1\text{H-NMR}$**  (400 MHz,  $\text{D}_2\text{O}$ ,  $\delta/\text{ppm}$ ): 7.62 (q,  $J = 1.4$  Hz, 1H), 7.00 – 6.94 (m, 1H), 6.53 (dt,  $J = 6.2, 1.8$  Hz, 1H), 5.94 (ddd,  $J = 6.5, 2.6, 1.6$  Hz, 1H), 5.15 – 5.09 (m, 1H), 4.14 (ddd,  $J = 6.2, 3.4, 1.9$  Hz, 2H), 3.19 (q,  $J = 7.4$  Hz, 18H), 1.90 (d,  $J = 1.3$  Hz, 3H), 1.28 (t,  $J = 7.3$  Hz, 27H).  **$^{13}\text{C}\{^1\text{H}\}\text{-NMR}$**  (101 MHz,  $\text{D}_2\text{O}$ ,  $\delta/\text{ppm}$ ): 166.77, 152.26, 138.18, 134.33, 125.10, 111.52, 89.95, 85.97 (d,  $J = 8.5$  Hz), 66.27 (d,  $J = 5.7$  Hz), 46.63, 11.43, 8.19.  **$^{31}\text{P}\{^1\text{H}\}\text{-NMR}$**  (162 MHz,  $\text{D}_2\text{O}$ ,  $\delta/\text{ppm}$ ): -10.20 (d,  $J = 20.9$  Hz), -11.42 (d,  $J = 20.7$  Hz). **HRMS** (ESI)  $m/z$  for  $\text{C}_{10}\text{H}_{13}\text{N}_2\text{O}_{10}\text{P}_2$   $[\text{M-H}]^-$ : calcd. 383.0051, found 383.0042.

## 9. Synthesis of aryne precursors without literature precedence

### 2-bromopyrene-1-ol (**SI-18**)

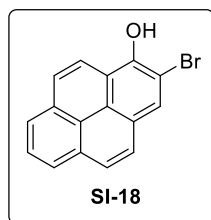

Compound **SI-18** was synthesized according to GHOTEKAR et al. The analytical data matched the previously published values.<sup>13</sup>

### 2-(trimethylsilyl)pyren-1-yl trifluoromethanesulfonate (**SI-19**)

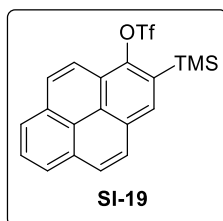

A flame-dried, argon-filled 50 mL three-necked flask equipped with a magnetic stir bar and a reflux condenser was charged with a solution of 2-bromopyrene-1-ol (**SI-18**, 1.52 g, 5.12 mmol) in THF (17 mL). Then HMDS (1.16 mL, 5.63 mmol, 1.1 eq) was added and the mixture was heated to reflux for 5 h. After cooling to rt, the solvent was removed under reduced pressure. The crude product was used in the next step without further purification.

A flame-dried, argon-filled 100 mL Schlenk flask equipped with a magnetic stir bar was charged with a solution of the crude product [((2-bromopyren-1-yl)oxy)trimethylsilane] in THF (23 mL). The solution was cooled to  $-78^{\circ}\text{C}$  and *n*-BuLi was added dropwise. After stirring for 1 h at  $-78^{\circ}\text{C}$ ,  $\text{TF}_2\text{O}$  was added dropwise and stirring was continued for 1 h at  $-78^{\circ}\text{C}$ . An aqueous saturated  $\text{NaHCO}_3$  solution (15 mL) was then added at  $-78^{\circ}\text{C}$  and the mixture was allowed to warm to rt. The layers were separated, and the aqueous layer was extracted with  $\text{Et}_2\text{O}$  ( $3 \times 20$  mL). The combined organic layers were dried over  $\text{Na}_2\text{SO}_4$  and the solvent was removed under reduced pressure. The product was purified by column chromatography (cyclohexane/ ethyl acetate, 100:1) and obtained as a yellowish solid (**SI-19**, 1.37 g, 3.23 mmol, 63%). Crystallization from hot chloroform ( $50^{\circ}\text{C}$ ) at room temperature gave single crystals suitable for a X-ray analysis (see below for the report).

$R_f$  (cyclohexane/ ethyl acetate, 100:1) = 0.45.  $^1\text{H-NMR}$  (400 MHz,  $\text{CDCl}_3$ ,  $\delta/\text{ppm}$ ): 8.30 (s, 1H), 8.27 (d,  $J = 9.3$  Hz, 1H), 8.20 – 8.11 (m, 3H), 8.07 – 7.90 (m, 3H), 0.66 (s, 9H).  $^{13}\text{C}\{^1\text{H}\}\text{-NMR}$  (101 MHz,  $\text{CDCl}_3$ ,  $\delta/\text{ppm}$ ): 145.59, 132.20, 132.17, 131.16, 130.78, 130.52, 129.09, 128.55, 127.10, 126.89, 126.61, 126.28, 125.97, 123.96, 123.91, 120.40 (q,  $J = 1.7$  Hz), 119.02 (q,  $J = 320.2$  Hz), 0.63.  $^{19}\text{F NMR}$  (377 MHz,  $\text{CDCl}_3$ ,  $\delta/\text{ppm}$ ): -72.59. **HRMS** (APCI)  $m/z$  for  $\text{C}_{20}\text{H}_{16}\text{F}_3\text{O}_3\text{SSi}$   $[\text{M-H}]^-$ : calcd. 421.0547, found 421.0550.

#### 4-((trimethylsilyl)ethynyl)phenol (SI-20)

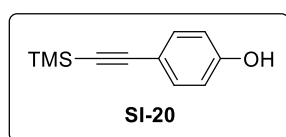

Compound **SI-20** was synthesized according to HUDSON et al. The analytical data matched the previously published values.<sup>14</sup>

#### 4-((trimethylsilyl)ethynyl)phenyl isopropylcarbamate (SI-21)

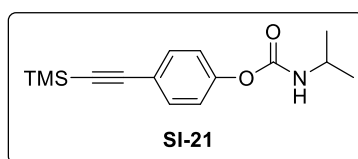

A flame-dried, argon-filled 100 mL Schlenk flask equipped with a magnetic stir bar was charged with a solution of 4-((trimethylsilyl)ethynyl)phenol (**SI-20**, 1.90 g, 10.0 mmol) in  $\text{CH}_2\text{Cl}_2$  (33 mL). Subsequently *i*-PrNCO (1.28 g, 15.0 mmol, 1.5 eq) was added, followed by  $\text{NEt}_3$  (274  $\mu\text{L}$ , 2.00 mmol, 0.2 eq) and then the mixture was stirred for 2 h at rt. After that the solvent was removed under reduced pressure. The residue was purified by column chromatography (cyclohexane/ ethyl acetate, 5:1) and the product (**SI-21**, 2.60 g, 9.45 mmol, 95%) was obtained as a colorless solid.

$R_f$  (cyclohexane/ ethyl acetate, 5:1) = 0.35.  $^1\text{H-NMR}$  (400 MHz,  $\text{CDCl}_3$ ,  $\delta/\text{ppm}$ ): 7.49 – 7.40 (m, 2H), 7.16 – 7.04 (m, 2H), 4.83 (d,  $J = 7.9$  Hz, 1H), 4.01 – 3.79 (m, 1H), 1.23 (d,  $J = 6.6$  Hz, 6H), 0.24 (s, 9H).  $^{13}\text{C}\{^1\text{H}\}\text{-NMR}$  (101 MHz,  $\text{CDCl}_3$ ,  $\delta/\text{ppm}$ ): 153.28, 151.24, 133.16, 121.57, 120.13, 104.61, 94.04, 43.65, 23.05, 0.12. **HRMS** (ESI)  $m/z$  for  $\text{C}_{15}\text{H}_{22}\text{NO}_2\text{Si}$   $[\text{M+H}]^+$ : calcd. 276.1414, found 276.1416.

**2-(trimethylsilyl)-4-((trimethylsilyl)ethynyl)phenyl isopropylcarbamate (SI-22)**

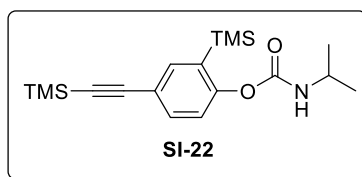

A flame-dried, argon-filled 250 mL Schlenk flask equipped with a magnetic stir bar was charged with 4-(trimethylsilyl)ethynylphenyl isopropylcarbamate (**SI-21**, 2.60 g, 9.45 mmol) and Et<sub>2</sub>O (94.5 mL). After cooling to 0°C, TMEDA (1.56 mL, 10.4 mmol, 1.1 eq) was added, followed by a solution of TBSOTf in *n*-pentane (8 mL, 1.3 M, 10.4 mmol, 1.1 eq) and then the mixture was stirred for 5 min at 0°C and further 30 min at rt. Additional TMEDA (2.83 mL, 18.9 mmol, 2.0 eq) was added and the mixture was cooled to -78°C. Then *n*-BuLi (7.60 mL, 2.48 M in *n*-hexane, 18.9 mmol, 2.0 eq) was added dropwise over 60 min. After an additional hour at -78°C, TMSCl was added dropwise over 35 min and the mixture was stirred for a further 85 min at -78°C. An aqueous saturated NaHSO<sub>4</sub> solution (40 mL) was then added at -78°C and the mixture was allowed to warm to rt. The layers were separated, and the organic layer was washed with aqueous saturated NaHSO<sub>4</sub> solution (60 mL) and brine (60 mL). The organic layer was dried over Na<sub>2</sub>SO<sub>4</sub>, and the solvent was removed under reduced pressure. The product was purified by column chromatography (cyclohexane/ ethyl acetate, 50:1 to 20:1) and obtained as a colorless solid (**SI-22**, 1.91 g, 5.50 mmol, 58%).

**R<sub>f</sub>** (cyclohexane/ ethyl acetate, 10:1) = 0.20. **<sup>1</sup>H-NMR** (400 MHz, CDCl<sub>3</sub>, δ/ppm): 7.53 (d, *J* = 2.1 Hz, 1H), 7.46 (dd, *J* = 8.4, 2.1 Hz, 1H), 7.06 (d, *J* = 8.4 Hz, 1H), 4.86 (d, *J* = 8.0 Hz, 1H), 3.90 (dp, *J* = 8.0, 6.5 Hz, 1H), 1.22 (d, *J* = 6.6 Hz, 6H), 0.28 (s, 9H), 0.25 (s, 9H). **<sup>13</sup>C{<sup>1</sup>H}-NMR** (101 MHz, CDCl<sub>3</sub>, δ/ppm): 155.66, 153.44, 138.64, 134.02, 132.08, 122.18, 119.97, 105.04, 93.82, 43.57, 23.01, 0.13, -0.87. **HRMS** (ESI) *m/z* for C<sub>18</sub>H<sub>30</sub>NO<sub>2</sub>Si<sub>2</sub> [M+H]<sup>+</sup>: calcd. 348.1810, found 348.1808.

**Synthesis of 2-(trimethylsilyl)-4-((trimethylsilyl)ethynyl)phenyl trifluoromethanesulfonate (SI-23)**

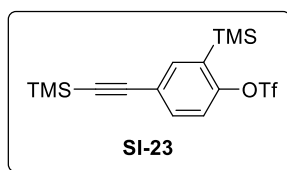

A flame-dried, argon-filled 250 mL Schlenk flask equipped with a magnetic stir bar was charged with a solution of 2-(trimethylsilyl)-4-((trimethylsilyl)ethynyl)phenyl isopropylcarbamate (**SI-22**, 1.51 g, 4.36 mmol) in MeCN (44 mL). Then DBU (980  $\mu$ L, 6.54 mmol, 1.5 eq), and Et<sub>2</sub>NH (540  $\mu$ L, 5.23 mmol, 1.2 eq) were added, and the mixture was heated to 40°C and stirred for 45 min. The reaction mixture was cooled to rt and a solution of PhNTf<sub>2</sub> (2.34 g, 6.54 mmol, 1.5 eq) in MeCN (13 mL) was added dropwise and stirred for 2 h. After that a saturated aqueous NaHSO<sub>4</sub> solution (30 mL) was added and the mixture was diluted with ethyl acetate (30 mL). The layers were separated, and the organic layer was washed with saturated aqueous NaHSO<sub>4</sub> solution (30 mL) and aqueous NaOH (10%, 2  $\times$  30 mL). The organic layer was dried over Na<sub>2</sub>SO<sub>4</sub> and the solvent was removed under reduced pressure. The residue was purified by column chromatography (*n*-pentane) and the product (**SI-23**, 1.43 g, 3.62 mmol, 83%) was isolated as a colorless liquid.

**<sup>1</sup>H-NMR** (400 MHz, CDCl<sub>3</sub>,  $\delta$ /ppm): 7.59 (dd,  $J = 2.2, 0.4$  Hz, 1H), 7.51 (dd,  $J = 8.6, 2.2$  Hz, 1H), 7.28 (d,  $J = 8.6$  Hz, 1H), 0.37 (s, 9H), 0.26 (s, 9H). **<sup>13</sup>C{<sup>1</sup>H}-NMR** (101 MHz, CDCl<sub>3</sub>,  $\delta$ /ppm): 154.51, 139.87, 134.77, 133.08, 123.01, 119.51 (d,  $J = 1.7$  Hz), 118.61 (q,  $J = 320$  Hz), 103.46, 96.26, 0.00, -0.79. **<sup>19</sup>F NMR** (377 MHz, CDCl<sub>3</sub>,  $\delta$ /ppm): -73.83. **HRMS** (APCI)  $m/z$  for C<sub>15</sub>H<sub>22</sub>F<sub>3</sub>O<sub>3</sub>SSi<sub>2</sub> [M+H]<sup>+</sup>: calcd. 395.0775, found 395.0775.



## 10. Synthesis of Amino-DEACM

The synthetic route towards amino-DEACM (**SI-26**) is shown in the supporting figure 5 below. Mesylate **SI-24** was synthesized according to Wong et al.<sup>15</sup> Analytical data were in accordance with literature.

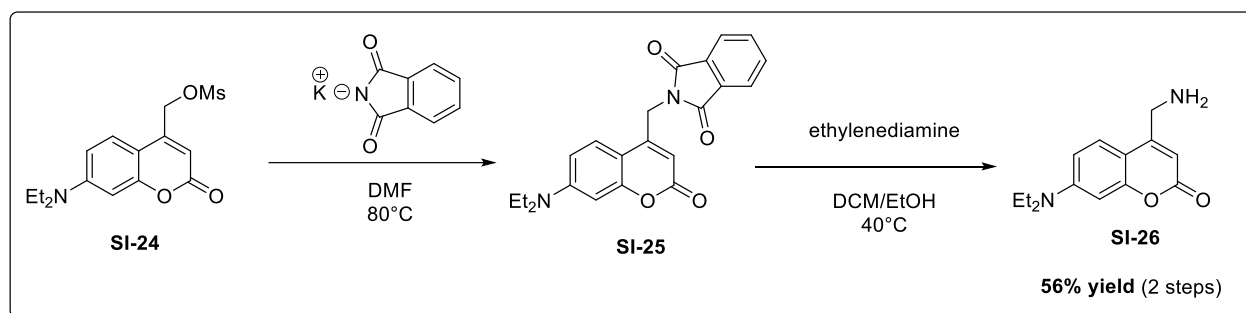

**Supporting figure 5:** Synthesis of Amino-DEACM **SI-26** from Mesylate **SI-24**.

### Step 1: 2-((7-(diethylamino)-2-oxo-2H-chromen-4-yl)methyl)isoindoline-1,3-dione (**SI-25**)

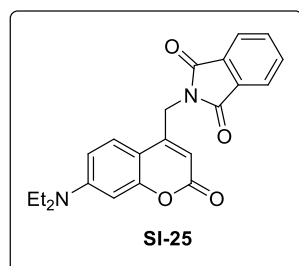

Potassium phthalimide (990 mg, 5.30 mmol, 1.2 eq.) was added to a solution of (7-(diethylamino)-2-oxo-2H-chromen-4-yl)methyl methanesulfonate (**SI-24**, 1.50 g, 4.61 mmol, 1.0 eq.) in DMF (90 mL) and it was stirred for 2 h at 80 °C. Afterwards the reaction mixture was poured into ice water (450 mL). The yellow precipitate was collected *via* Büchner funnel and was dried in a desiccator, over CaCl<sub>2</sub> and under vacuum, for 3 days. The dry solid was purified by recrystallization (toluene, 45 mL) and the title compound (**SI-25**, 950 mg, 2.52 mmol, 57%) was obtained as dark yellow crystals.

**<sup>1</sup>H-NMR** (400 MHz, CDCl<sub>3</sub>, δ/ppm): 7.95 – 7.86 (m, 2H), 7.81 – 7.74 (m, 2H), 7.55 (d, *J* = 9.0 Hz, 1H), 6.62 (dd, *J* = 9.0, 2.6 Hz, 1H), 6.51 (d, *J* = 2.6 Hz, 1H), 5.86 (t, *J* = 1.2 Hz, 1H), 4.94 (d, *J* = 1.2 Hz, 2H), 3.42 (q, *J* = 7.1 Hz, 4H), 1.21 (t, *J* = 7.1 Hz, 6H). **<sup>13</sup>C{<sup>1</sup>H}-NMR** (101 MHz, CDCl<sub>3</sub>, δ/ppm): 167.61, 161.79, 156.34, 150.76, 149.14, 134.47, 131.83, 124.66, 123.74, 108.73, 106.80, 106.57, 97.88, 44.78, 37.61, 12.45. **HRMS** (APCI) *m/z* for [C<sub>22</sub>H<sub>21</sub>N<sub>2</sub>O<sub>4</sub>]<sup>+</sup>: calcd. 377.1496, found 377.1491. **R<sub>f</sub>** = 0.54 (silica gel, CH:EA 1:1).

**Step 2:** 4-(aminomethyl)-7-(diethylamino)-2H-chromen-2-one (Amino-DEACM) (**SI-26**)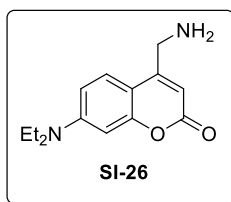

Ethylenediamine (220  $\mu$ L, 198 mg, 3.3 mmol, 5.0 eq.) was added to a solution of 2-((7-(diethylamino)-2-oxo-2H-chromen-4-yl)methyl)isoindoline-1,3-dione (**SI-25**, 250 mg, 664  $\mu$ mmol, 1.0 eq.) in DCM/EtOH (1:1, 25 mL). The solution was stirred for 5 h at 40 °C. Afterwards, the reaction mixture was directly dry loaded on deactivated silica (ca. 4 spatulas) and purified by flash chromatography (deactivated silica gel, DCM:MeOH 95:5). *Attention:* Solvent removal should be carried out below 35°C. The title compound (**SI-26**, 160 mg, 650  $\mu$ mol, 98%) was obtained as a yellow oil.

**$^1\text{H-NMR}$**  (300 MHz,  $\text{CDCl}_3$ ,  $\delta/\text{ppm}$ ): 7.37 (d,  $J = 9.0$  Hz, 1H), 6.57 (dd,  $J = 9.0, 2.6$  Hz, 1H), 6.50 (d,  $J = 2.6$  Hz, 1H), 6.18 (t,  $J = 1.3$  Hz, 1H), 3.98 (d,  $J = 1.3$  Hz, 2H), 3.40 (q,  $J = 7.1$  Hz, 4H), 1.53 (br. s, 2H), 1.19 (t,  $J = 7.1$  Hz, 6H).  **$^{13}\text{C}\{^1\text{H}\}\text{-NMR}$**  (101 MHz,  $\text{CDCl}_3$ ,  $\delta/\text{ppm}$ ): 162.51, 156.60, 156.24, 150.47, 124.39, 108.50, 107.10, 105.68, 97.87, 44.74, 42.27, 12.46. **HRMS** (ESI)  $m/z$  for  $[\text{C}_{14}\text{H}_{19}\text{N}_2\text{O}_2]^+$ : calcd. 247.1441 found 247.1442.  **$R_f$**  = 0.10 (deactivated silica gel, DCM:MeOH 95:5).

## 11. Supporting references

---

- [1] B. G. Ugarkar, A. J. Castellino, J. S. DaRe, M. Ramirez-Weinhouse, J. J. Kopcho, S. Rosengren, M. D. Erion, *J. Med. Chem.* **2003**, *46*, 22, 4750-4760.
- [2] D. K. Dean, *Synth. Commun.* **2002**, *32*, 1517-1521.
- [3] J. Singh, N. Steck, D. De, A. Hofer, A. Ripp, I. Captain, M. Keller, P. A. Wender, R. Bhandari, H. J. Jessen, *Angew. Chem. Int. Ed.* **2019**, *58*, 3928-3933.
- [4] L. Bialy, H. Waldmann, *Angew. Chem.* **2002**, *114*, 1819-1822.
- [5] S. Yang, C. Pannecouque, E. Lescrinier, A. Giraut, P. Herdewijn, *Org. Biomol. Chem.* **2012**, *10*, 146-153.
- [6] Y. Ueta, K. Mikami, S. Ito, *Angew. Chem. Int. Ed.* **2016**, *55*, 7525-7529.
- [7] Y. Wang, A. D. Stretton, M. C. McConnell, P. A. Wood, S. Parsons, J. B. Henry, A. R. Mount, T. H. Galow, *J. Am. Chem. Soc.* **2007**, *129*, 13193-13200.
- [8] D. Xu, Y. Zhao, D. Song, Z. Zhong, S. Feng, X. Xie, X. Wang, X. She, *Org. Lett.* **2017**, *19*, 3600-3603.
- [9] D. Peña, A. Cobas, D. Pérez, E. Guitián, *Synthesis* **2002**, *10*, 1454-1458.
- [10] G. S. Ghotekar, A. C. Shaikh, M. Muthukrishnan, *J. Org. Chem.* **2019**, *84*, 2269-2276.
- [11] R. N. Bell, L. F. Audrieth, O. F. Hill, *Ind. Eng. Chem. Res.* **1952**, *44*, 568-572.
- [12] T. Glonek, J. R. van Wazer, M. Mudgett, T. Myers, *Inorg. Chem.* **1972**, *11*, 567-570.
- [13] A. H. G. David, R. Casares, J. M. Cuerva, A. G. Campaña, V. Blanco, *J. Am. Chem. Soc.* **2019**, *141*, 18064-18074.
- [14] S. A. Hudson, K. J. McLean, S. Surade, Y.-Q. Yang, D. Leys, A. Ciulli, A. W. Munro, C. Abell, *Angew. Chem. Int. Ed.* **2012**, *51*, 9311-9316.
- [15] P. T. Wong, E. W. Roberts, S. Tang, J. Mukherjee, J. Cannon, A. J. Nip, K. Corbin, M. F. Krummel, S. K. Choi, *ACS Chem. Biol.* **2017**, *12*, 1001.

# ***12. NMR - spectra***

*(aligned according to molecule numbering)*

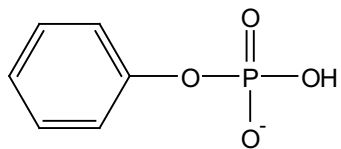

TBA salt

**27**

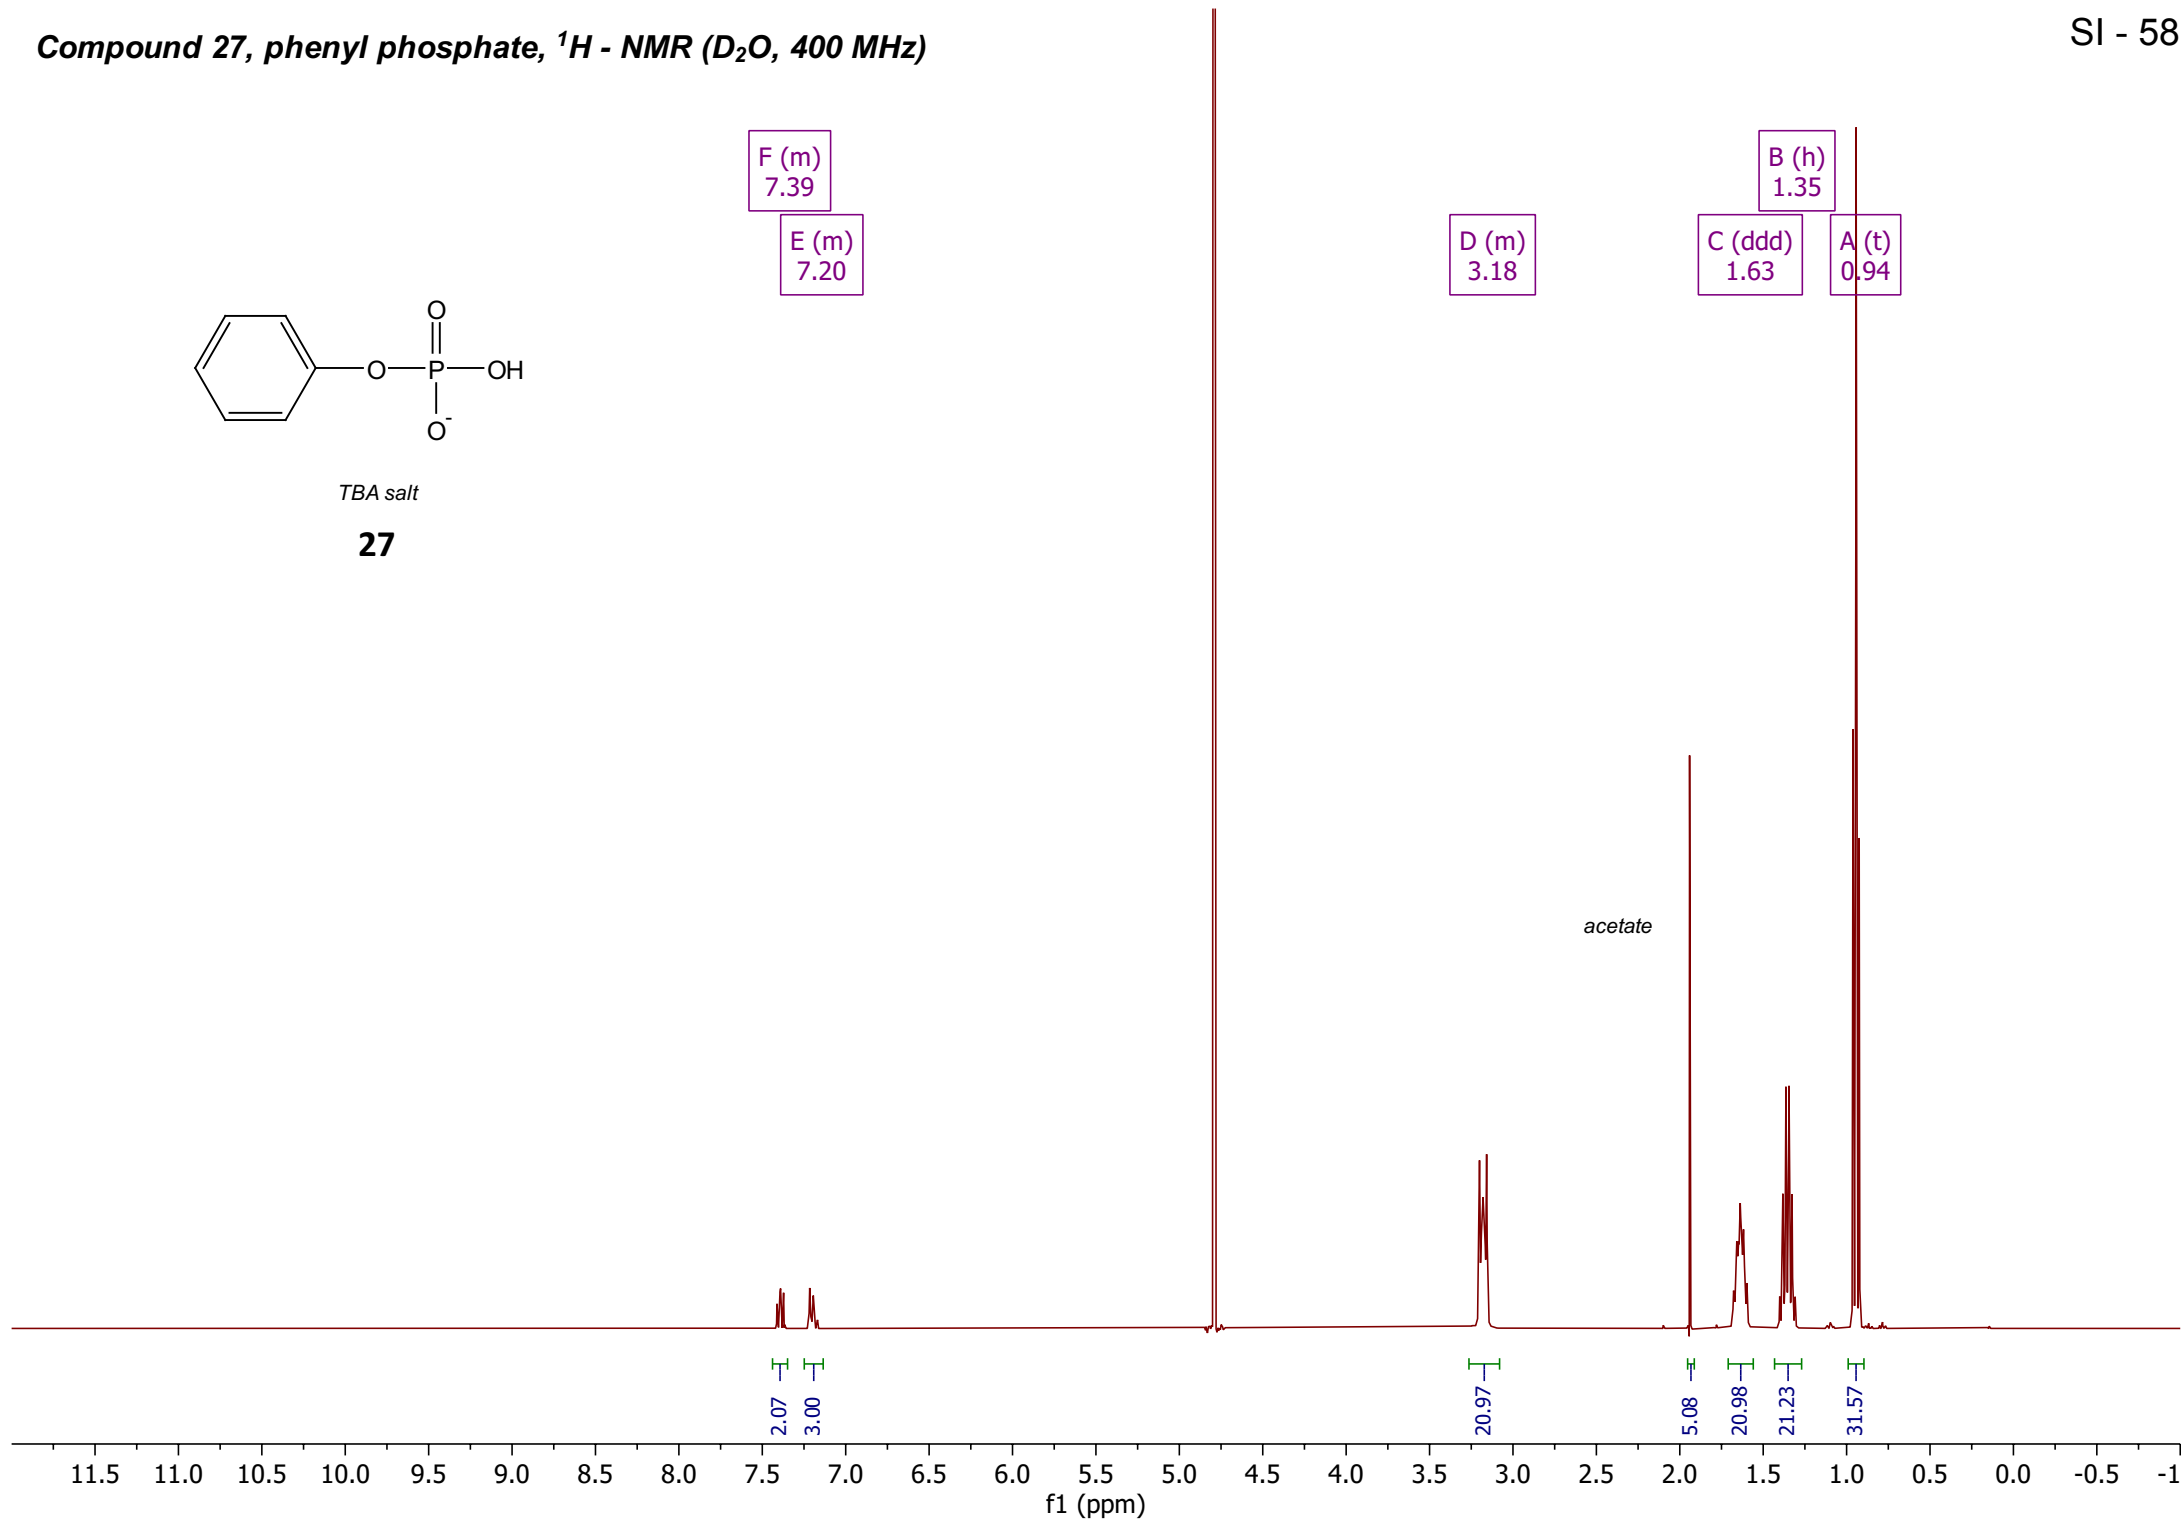

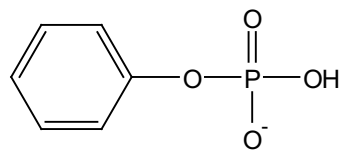

TBA salt

**27**

A (s)  
-3.53

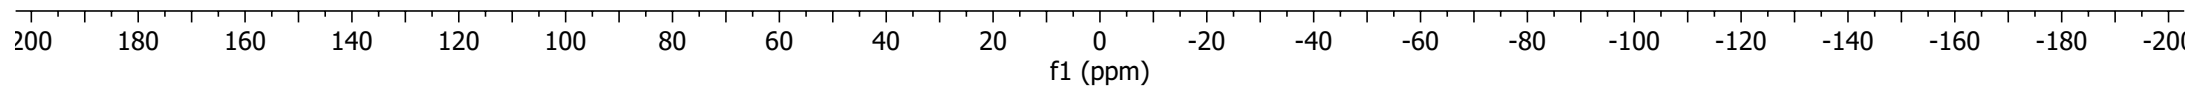



TBA salt

**27**

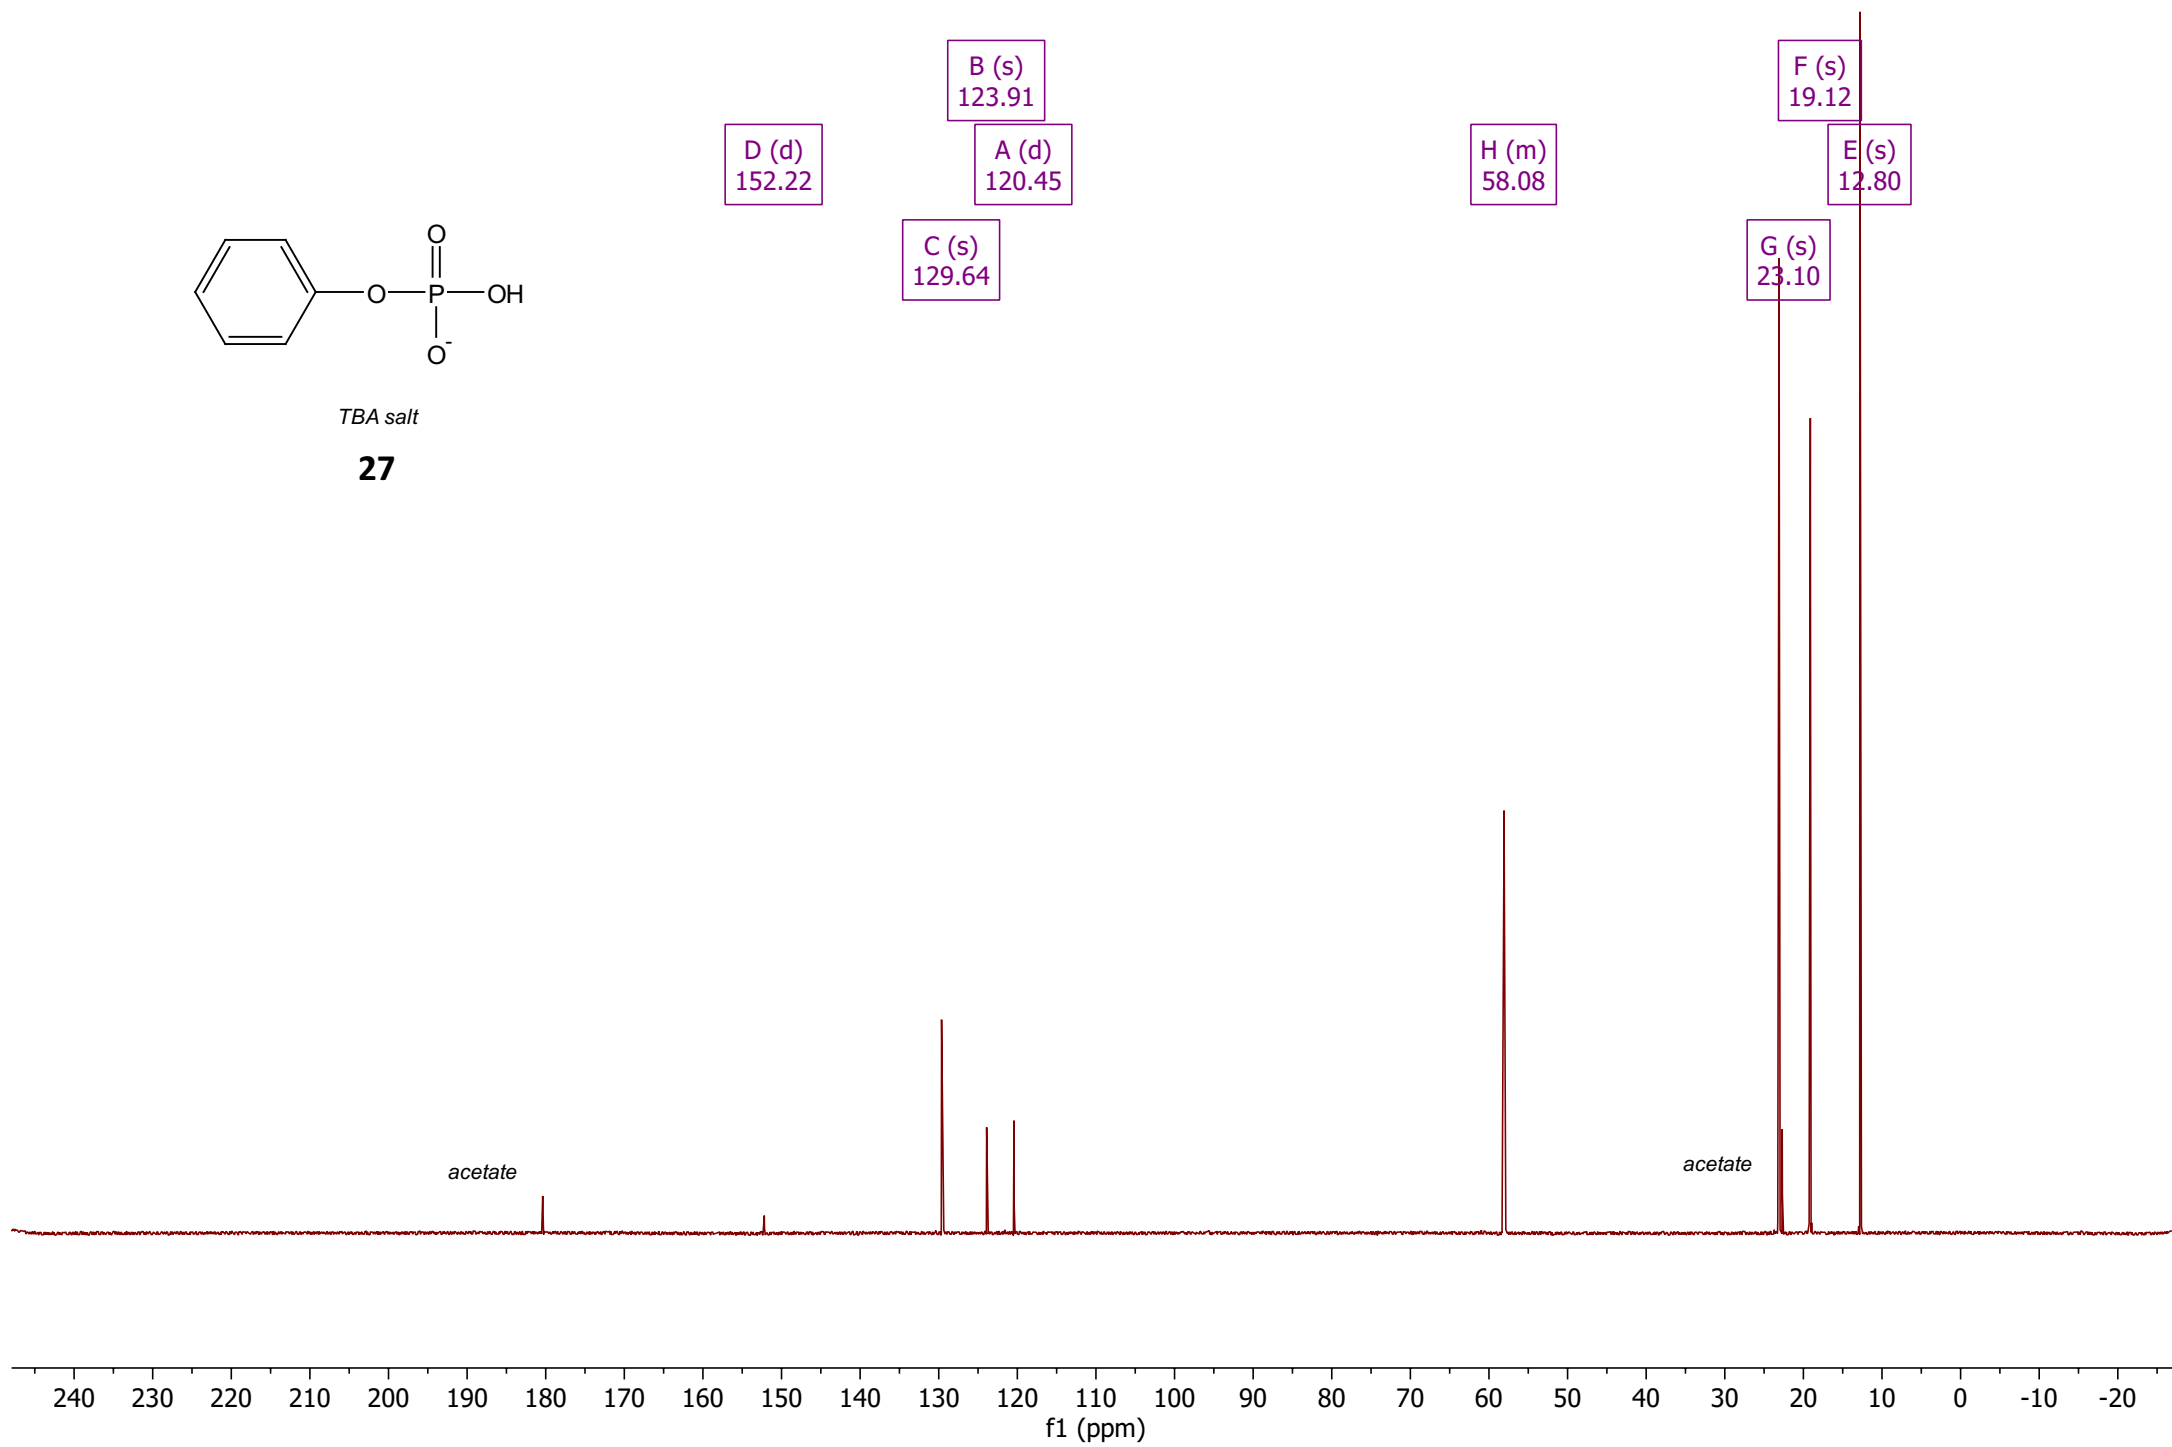

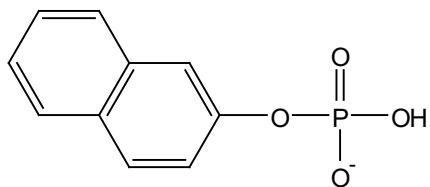

TBA salt

**28**

A (m) 7.89  
B (t) 7.67  
C (m) 7.46  
D (m) 3.03  
E (m) 1.52  
F (h) 1.29  
G (t) 0.91

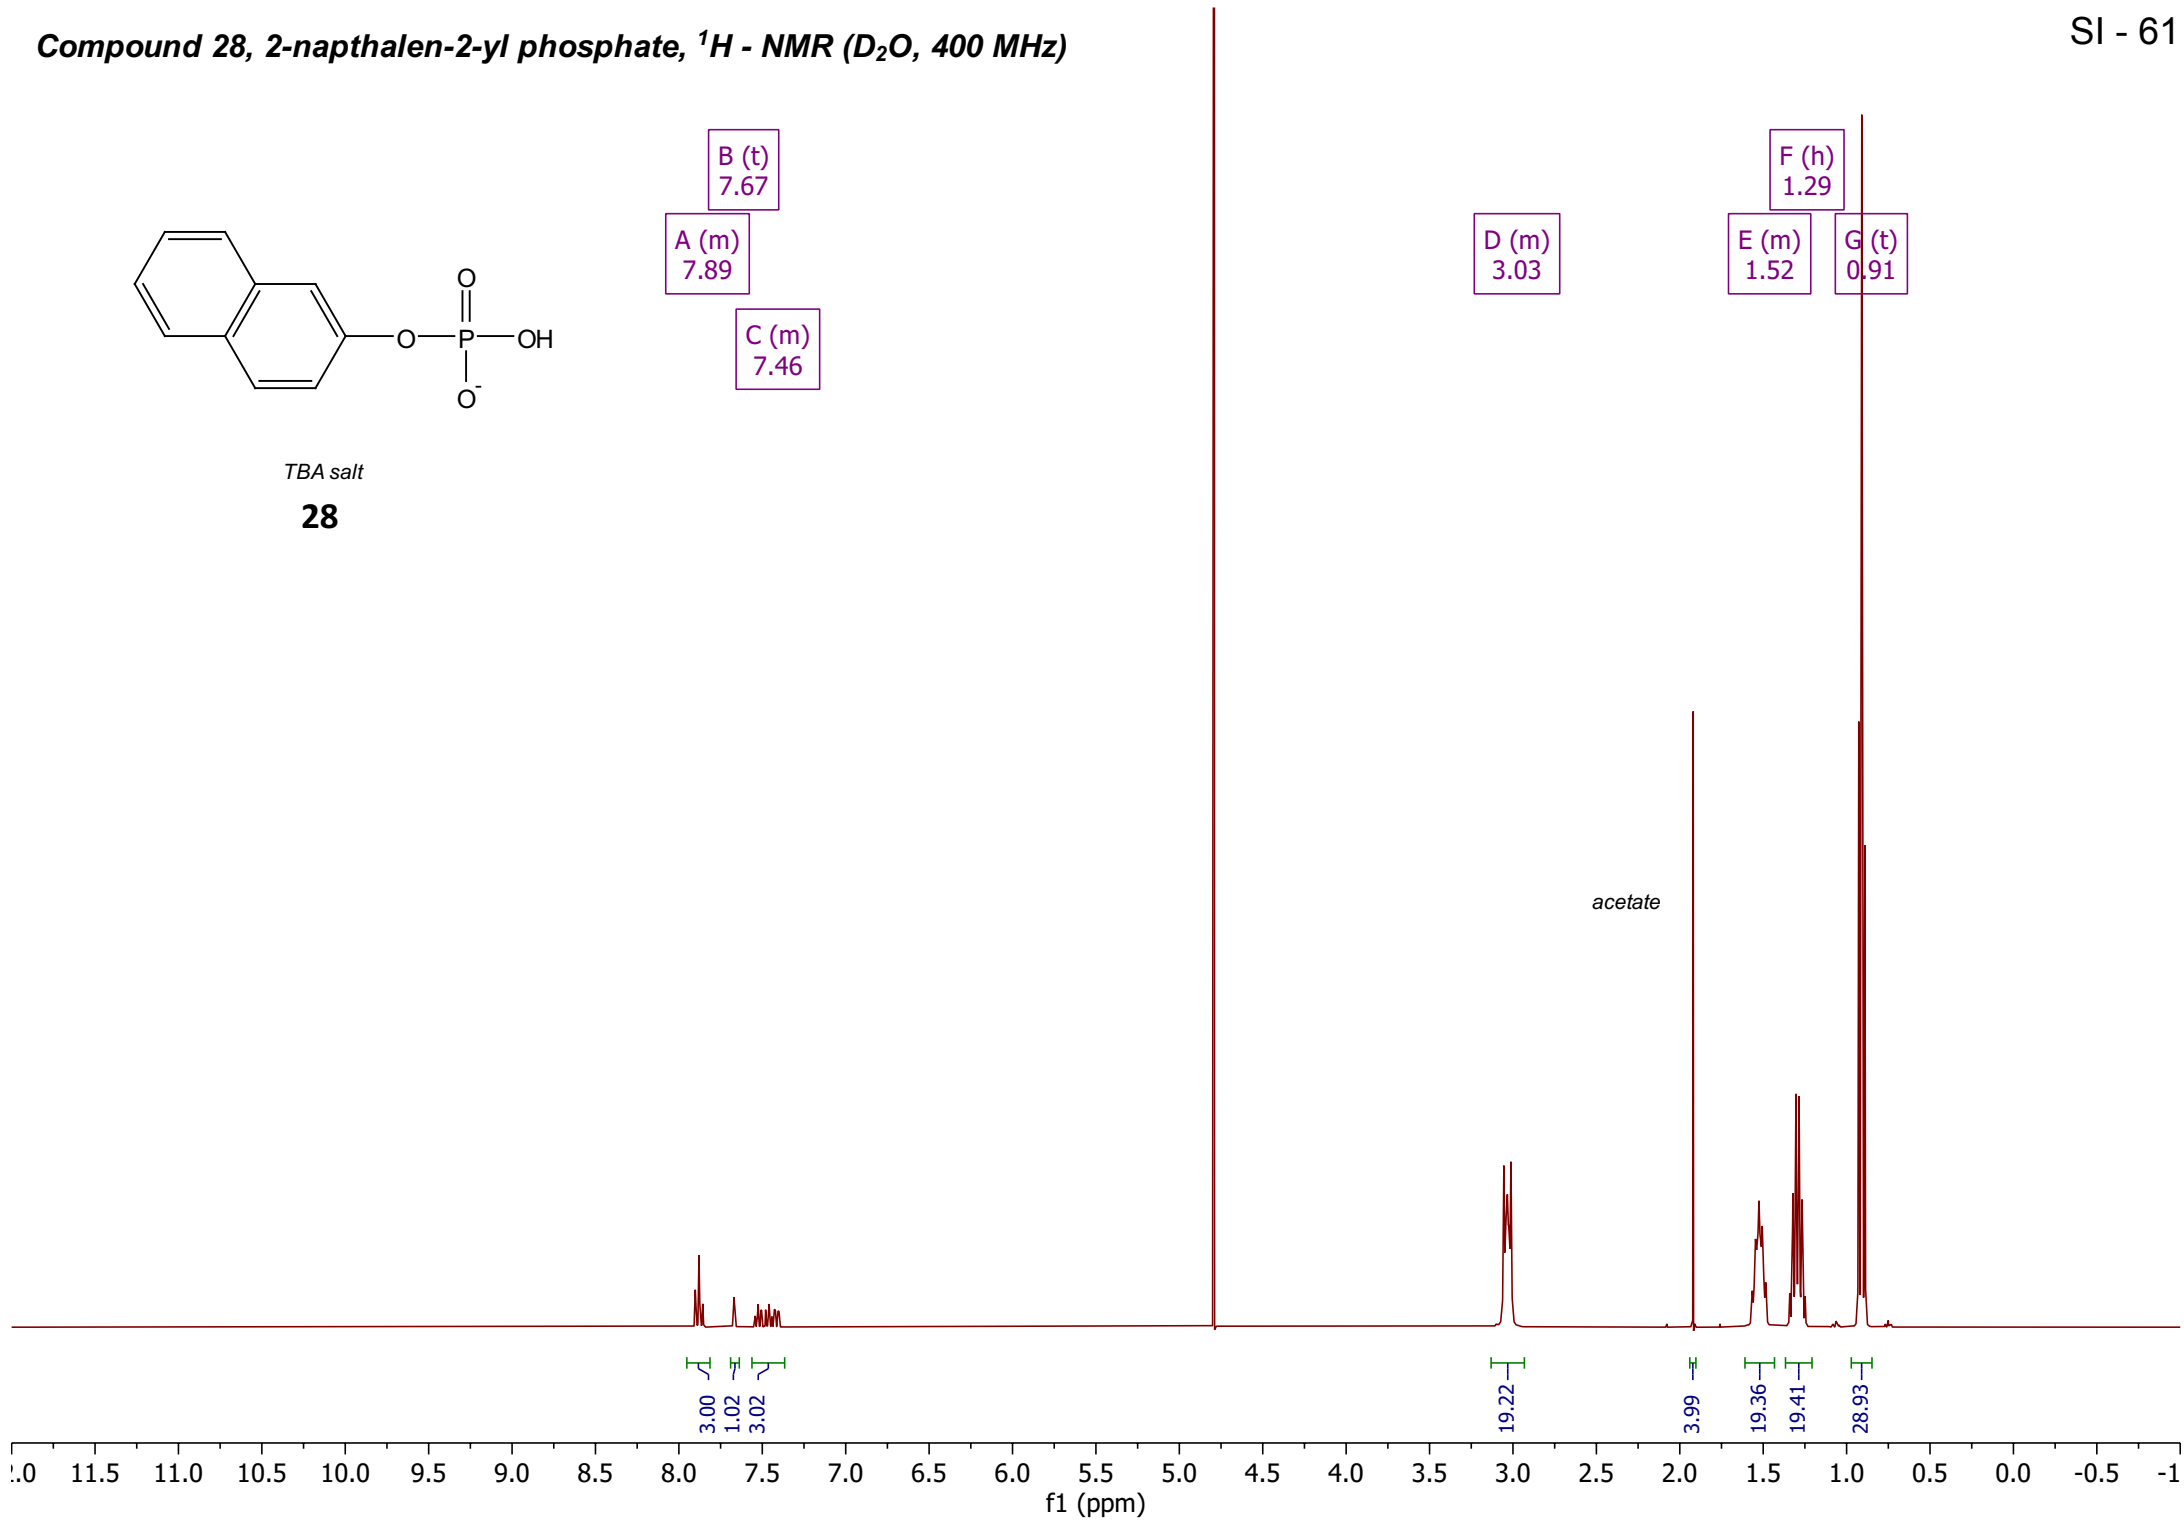





TBA salt

**28**

A (s)  
-3.43

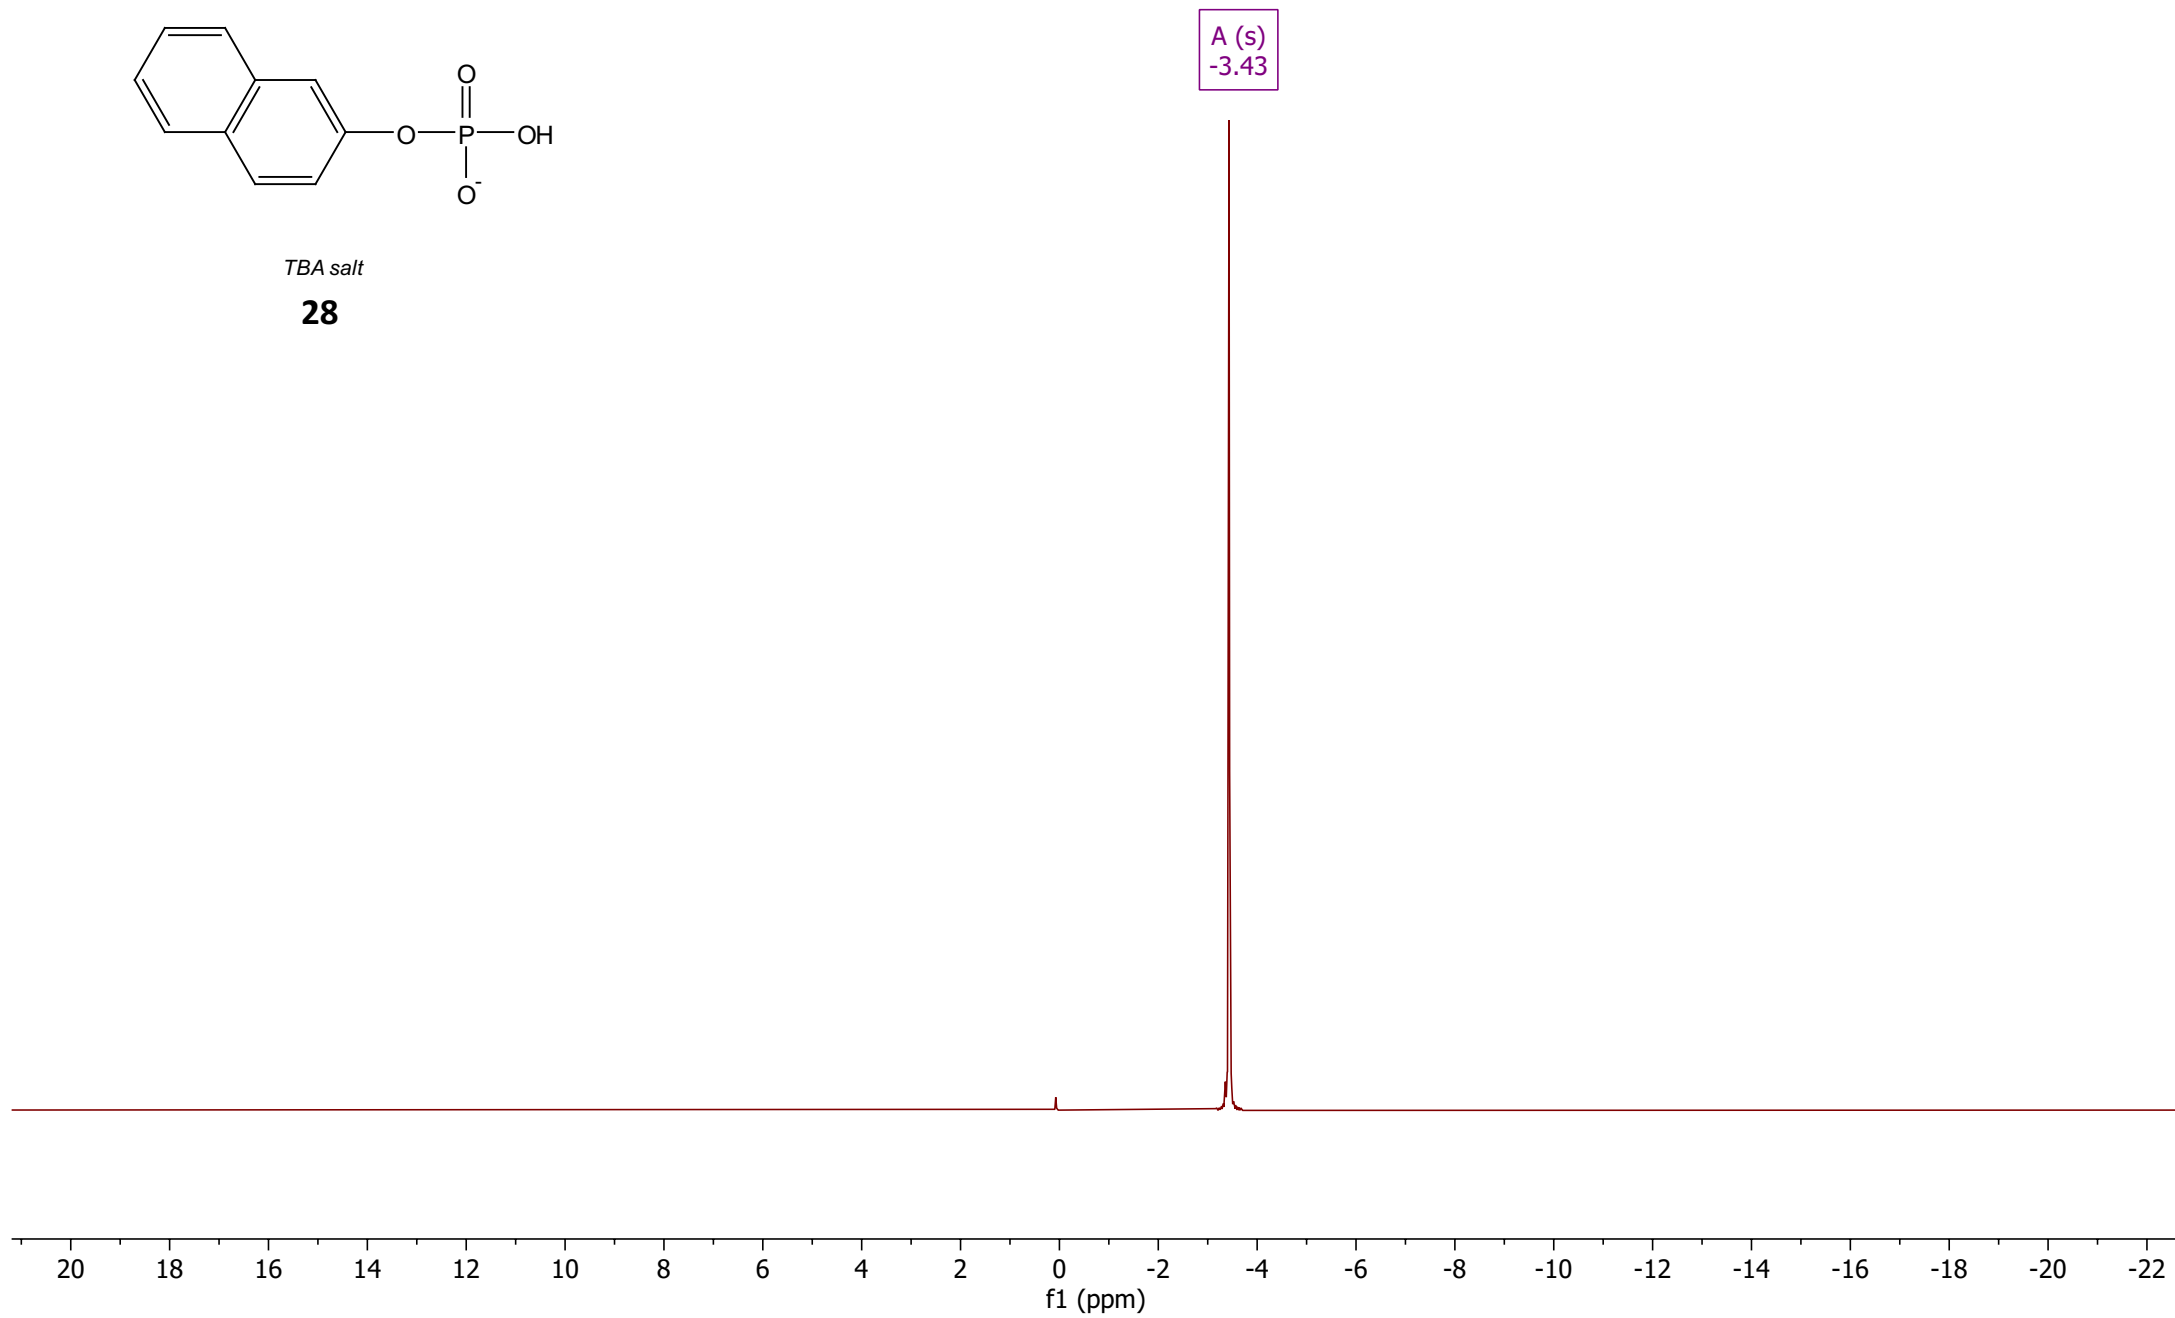



TBA salt

**28**

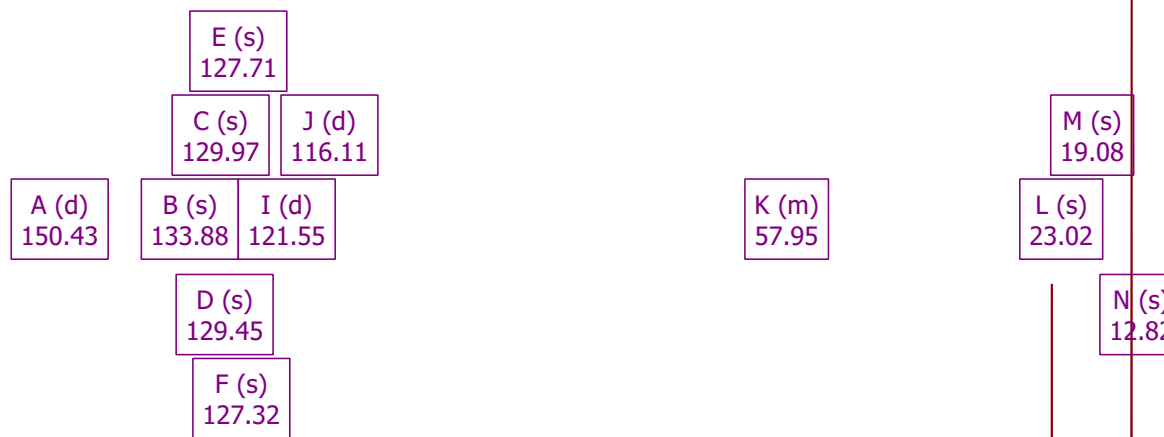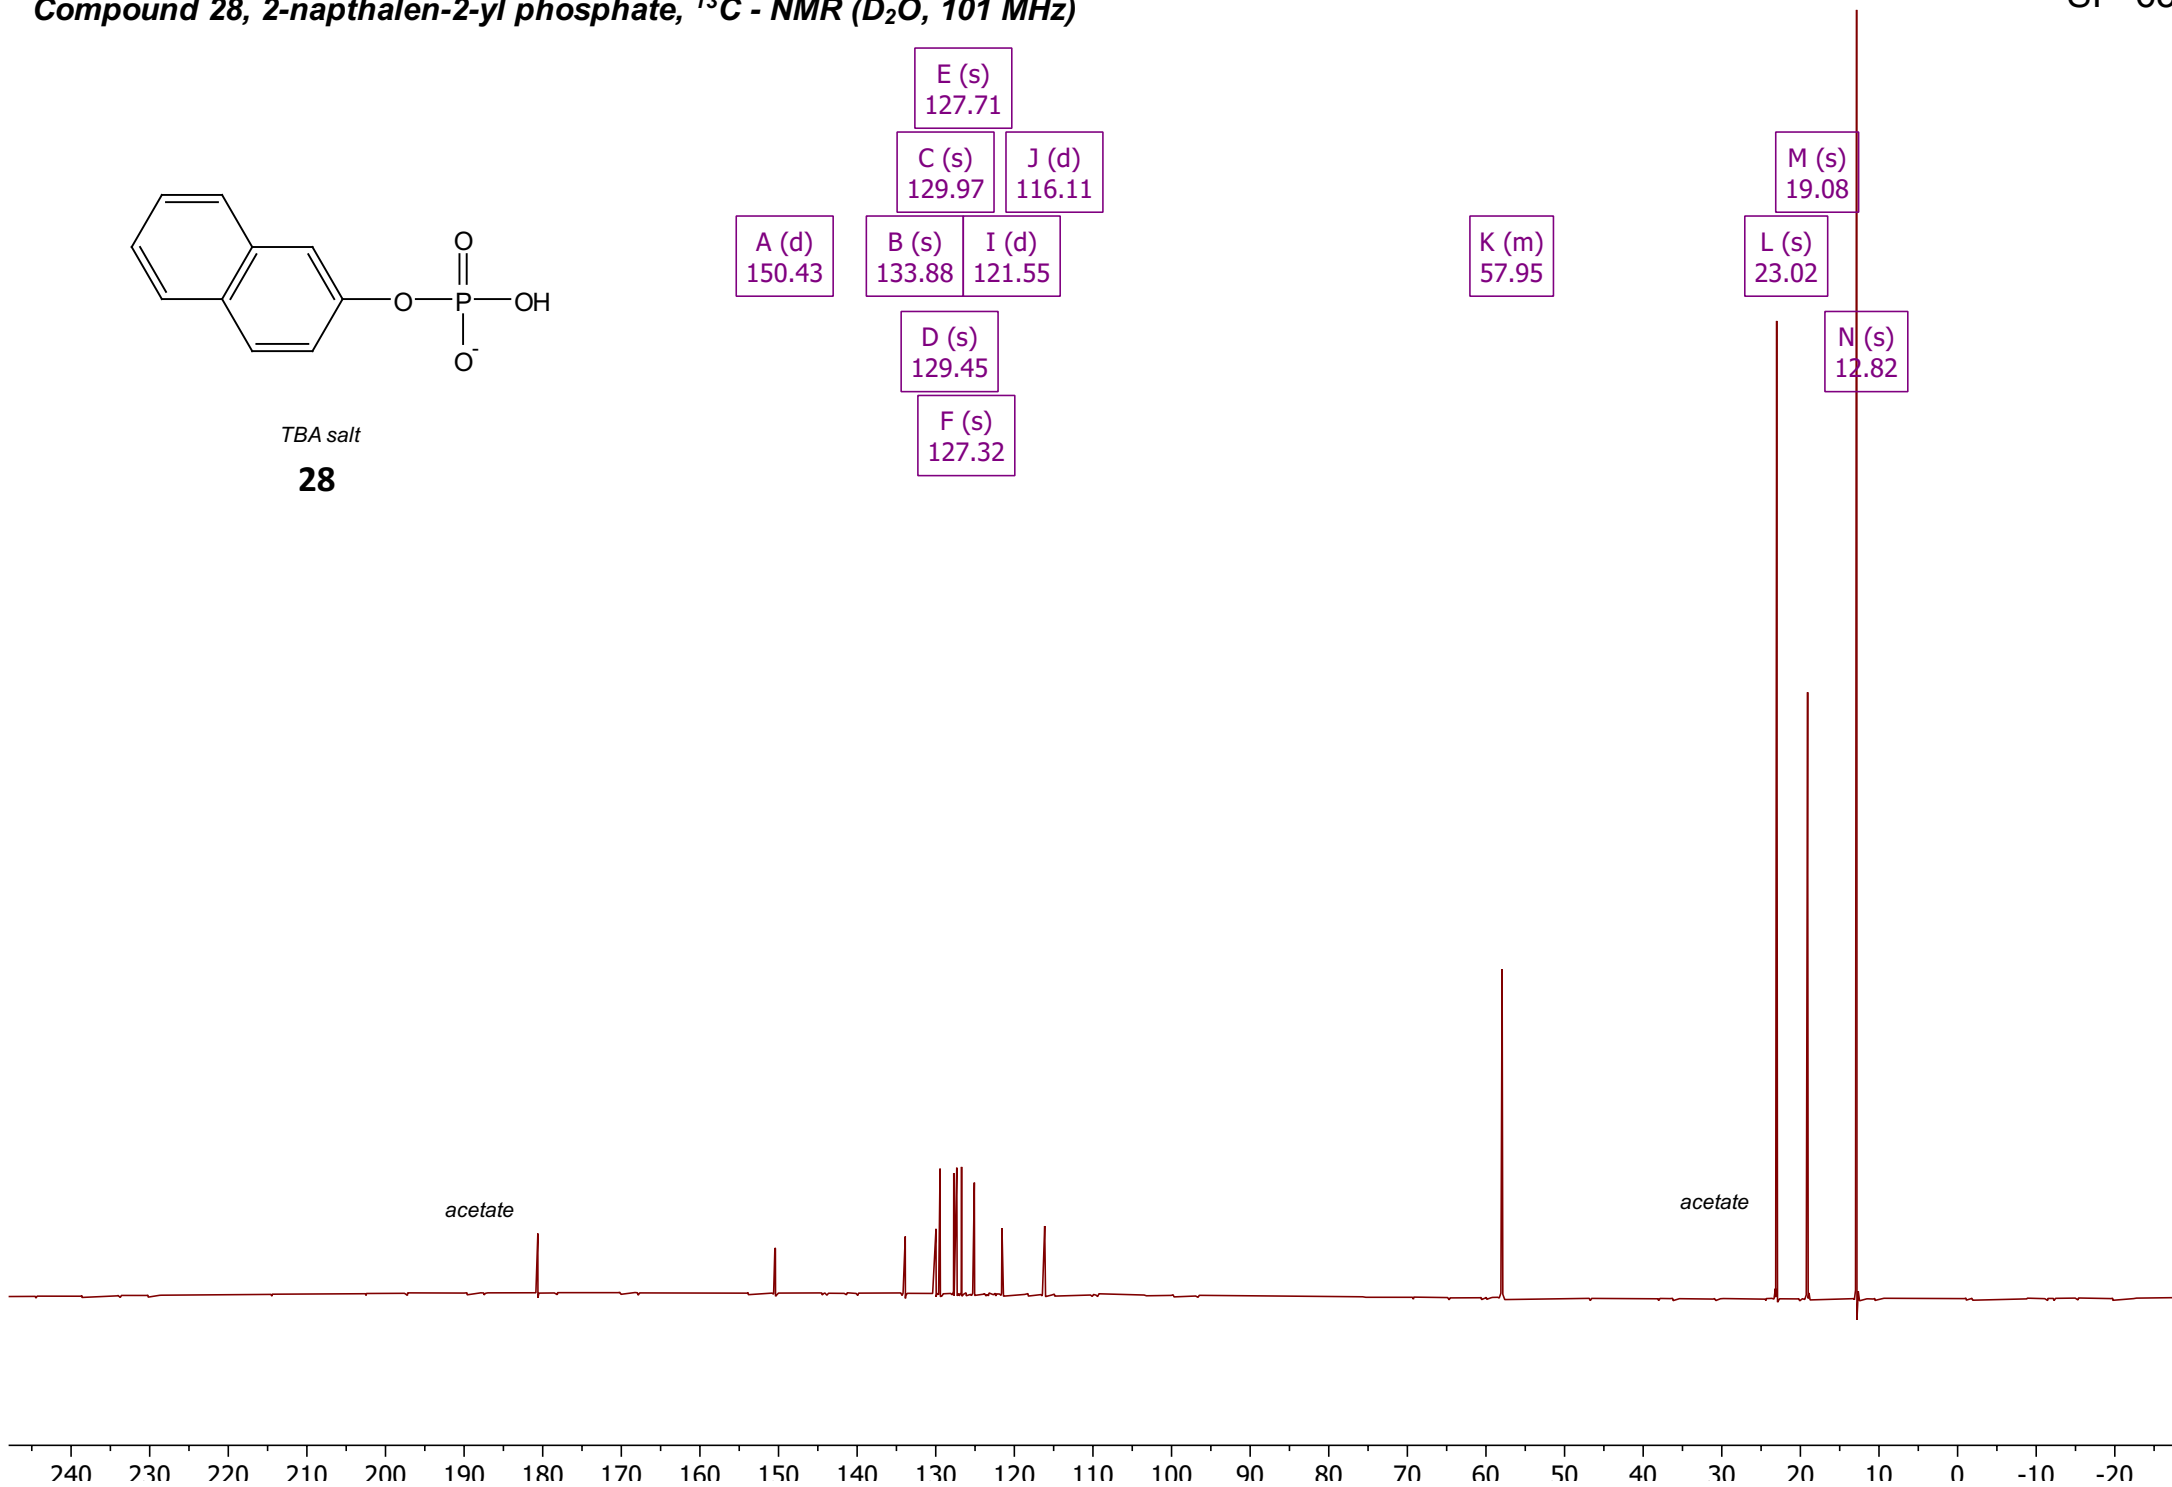

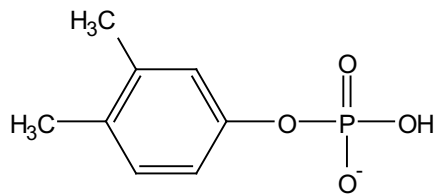

TBA salt

**29**

B (ddd)  
7.01

A (m)  
7.14

C (dddd)  
6.93

D (m)  
3.13

F (s)  
2.20

E (s)  
2.23

G (m)  
1.60

H (h)  
1.34

I (m)  
0.93

acetate

1.00  
0.97  
0.98

15.73

3.00  
2.96  
3.02

15.84

15.81

23.60

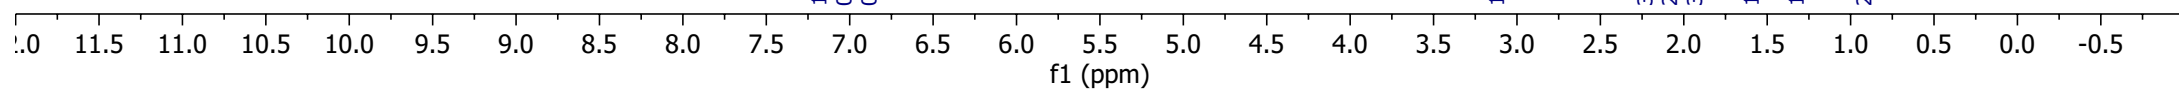

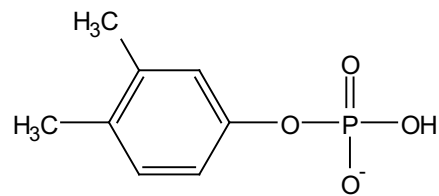

TBA salt

**29**

A (s)  
-3.68

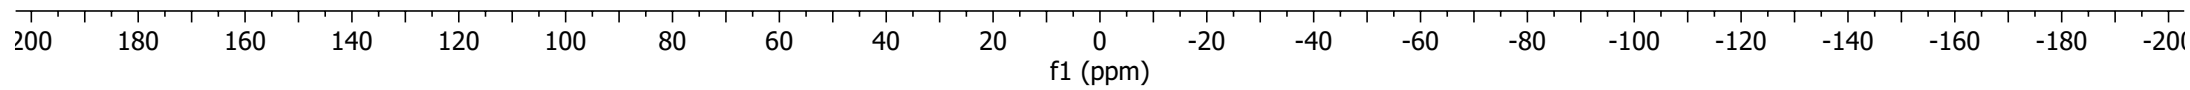

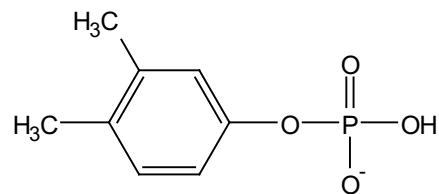

TBA salt

**29**

|        |        |        |
|--------|--------|--------|
| L (d)  | K (s)  | H (d)  |
| 150.19 | 138.26 | 121.46 |
|        | I (s)  | G (d)  |
|        | 130.25 | 117.54 |
|        | J (d)  |        |
|        | 132.23 |        |
|        |        | F (m)  |
|        |        | 58.03  |
|        |        | D (m)  |
|        |        | 19.11  |
|        |        | B (s)  |
|        |        | 18.13  |
|        |        | A (s)  |
|        |        | 12.83  |
|        |        | C (s)  |
|        |        | 19.01  |
|        |        | E (s)  |
|        |        | 23.08  |

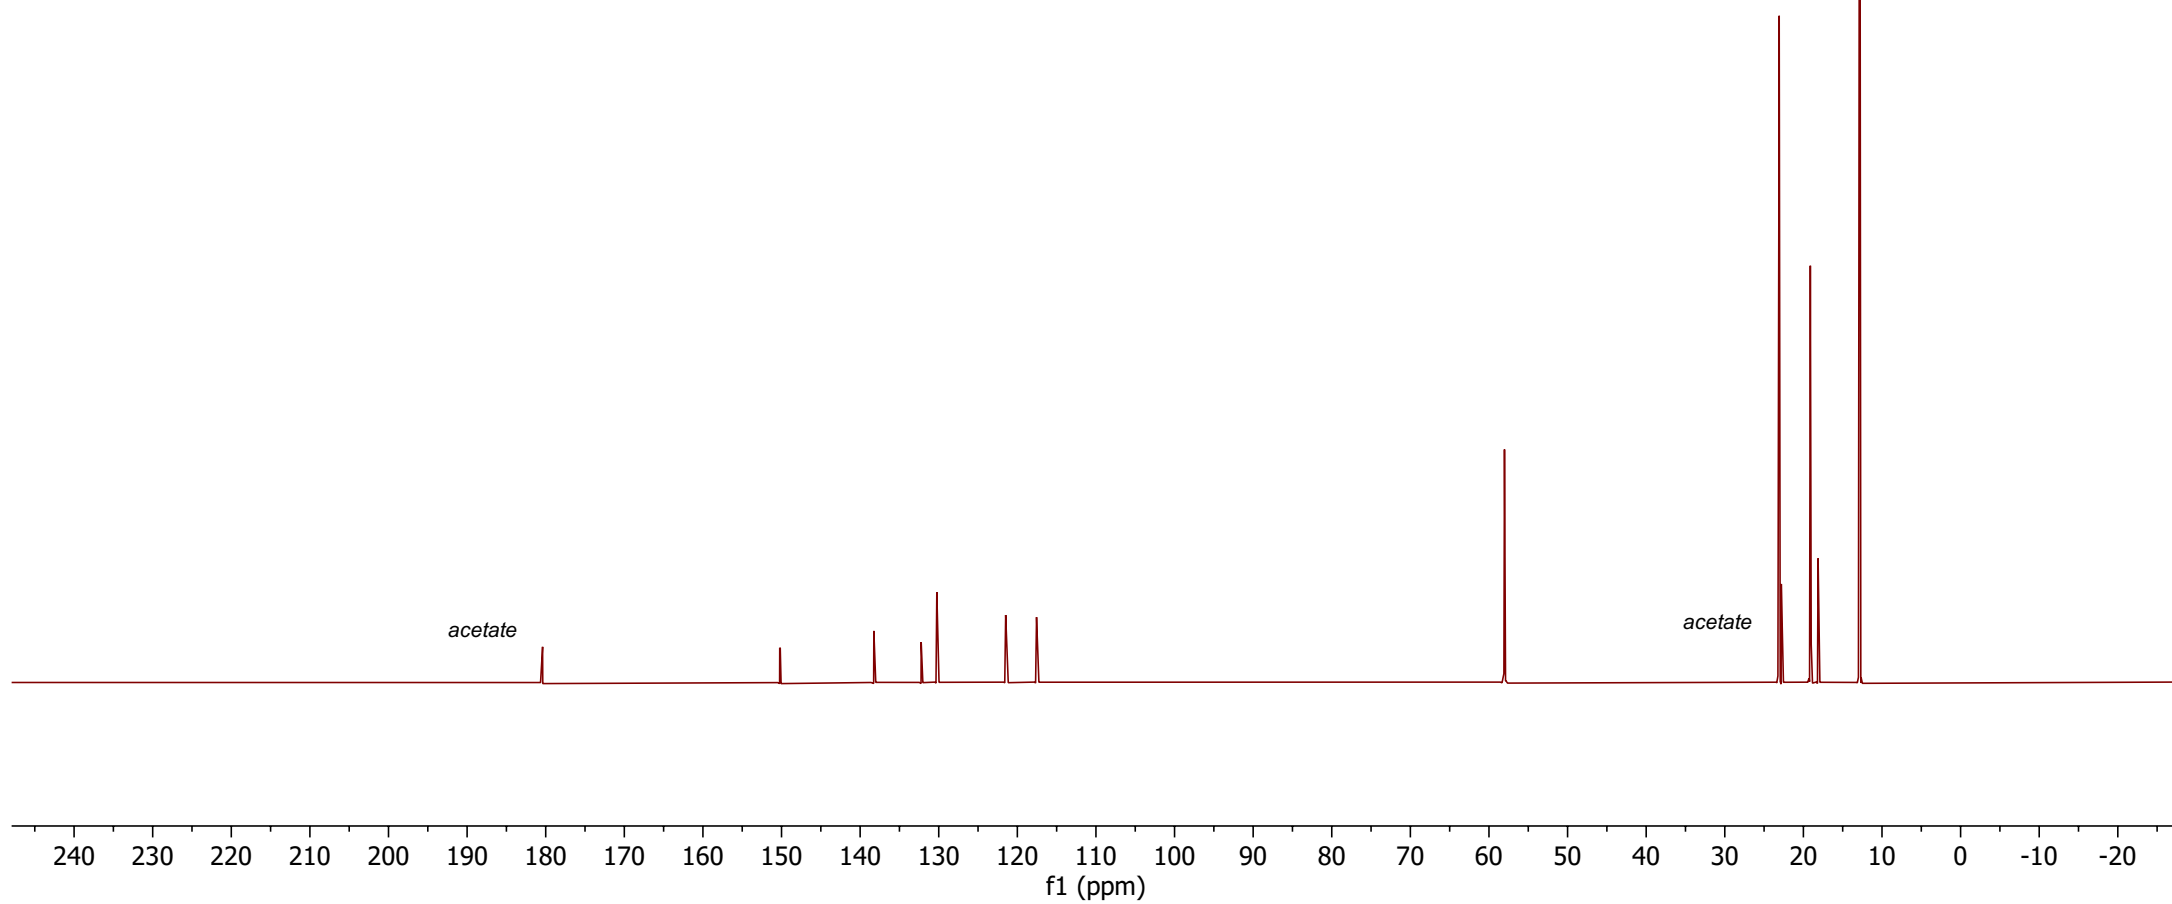

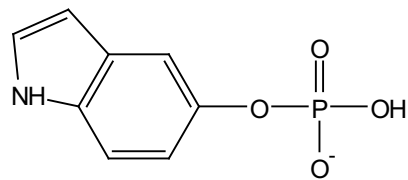

TBA salt

**30**

B (s)  
7.40

A (m)  
7.45

C (m)  
7.06

D (m)  
3.13

E (m)  
1.60

F (h)  
1.34

G (t)  
0.94

acetate

3.00  
1.36

1.47

36.75

11.61

36.72

36.94

55.19

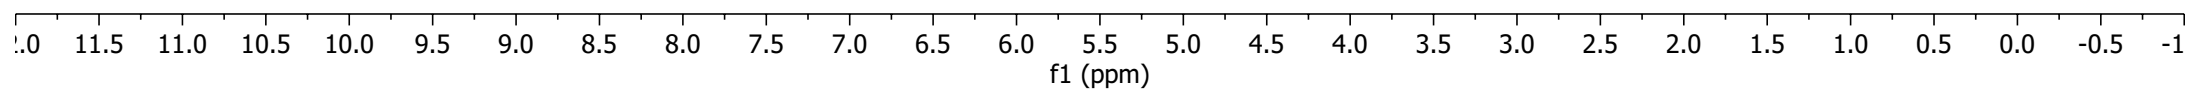

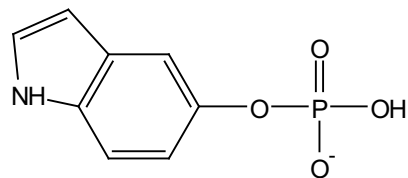

TBA salt

**30**

B (s)  
-3.59

A (s)  
-3.28

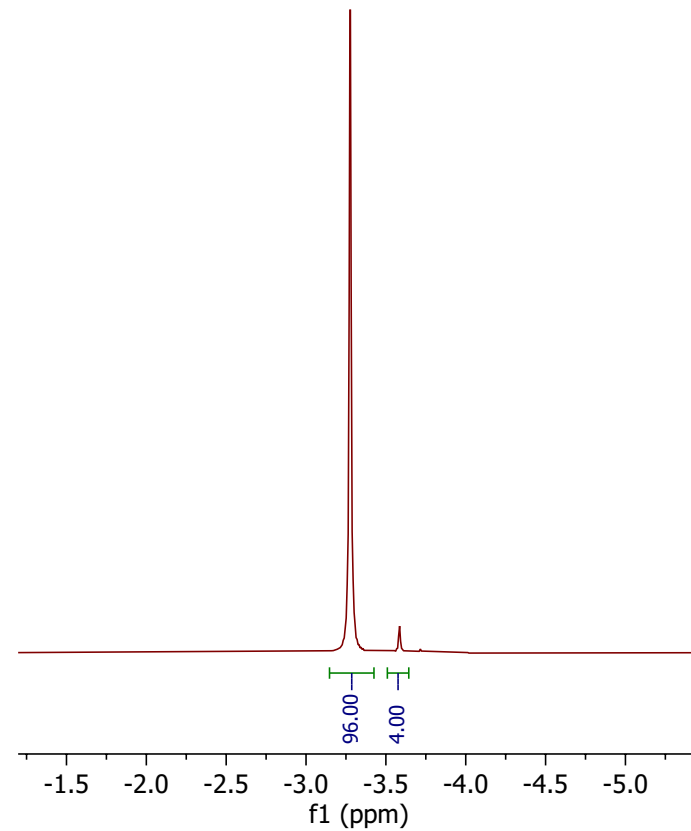



TBA salt

**30**

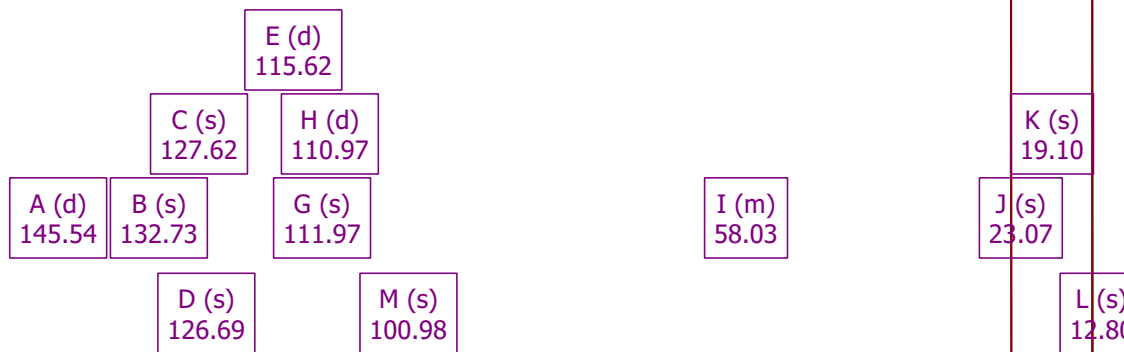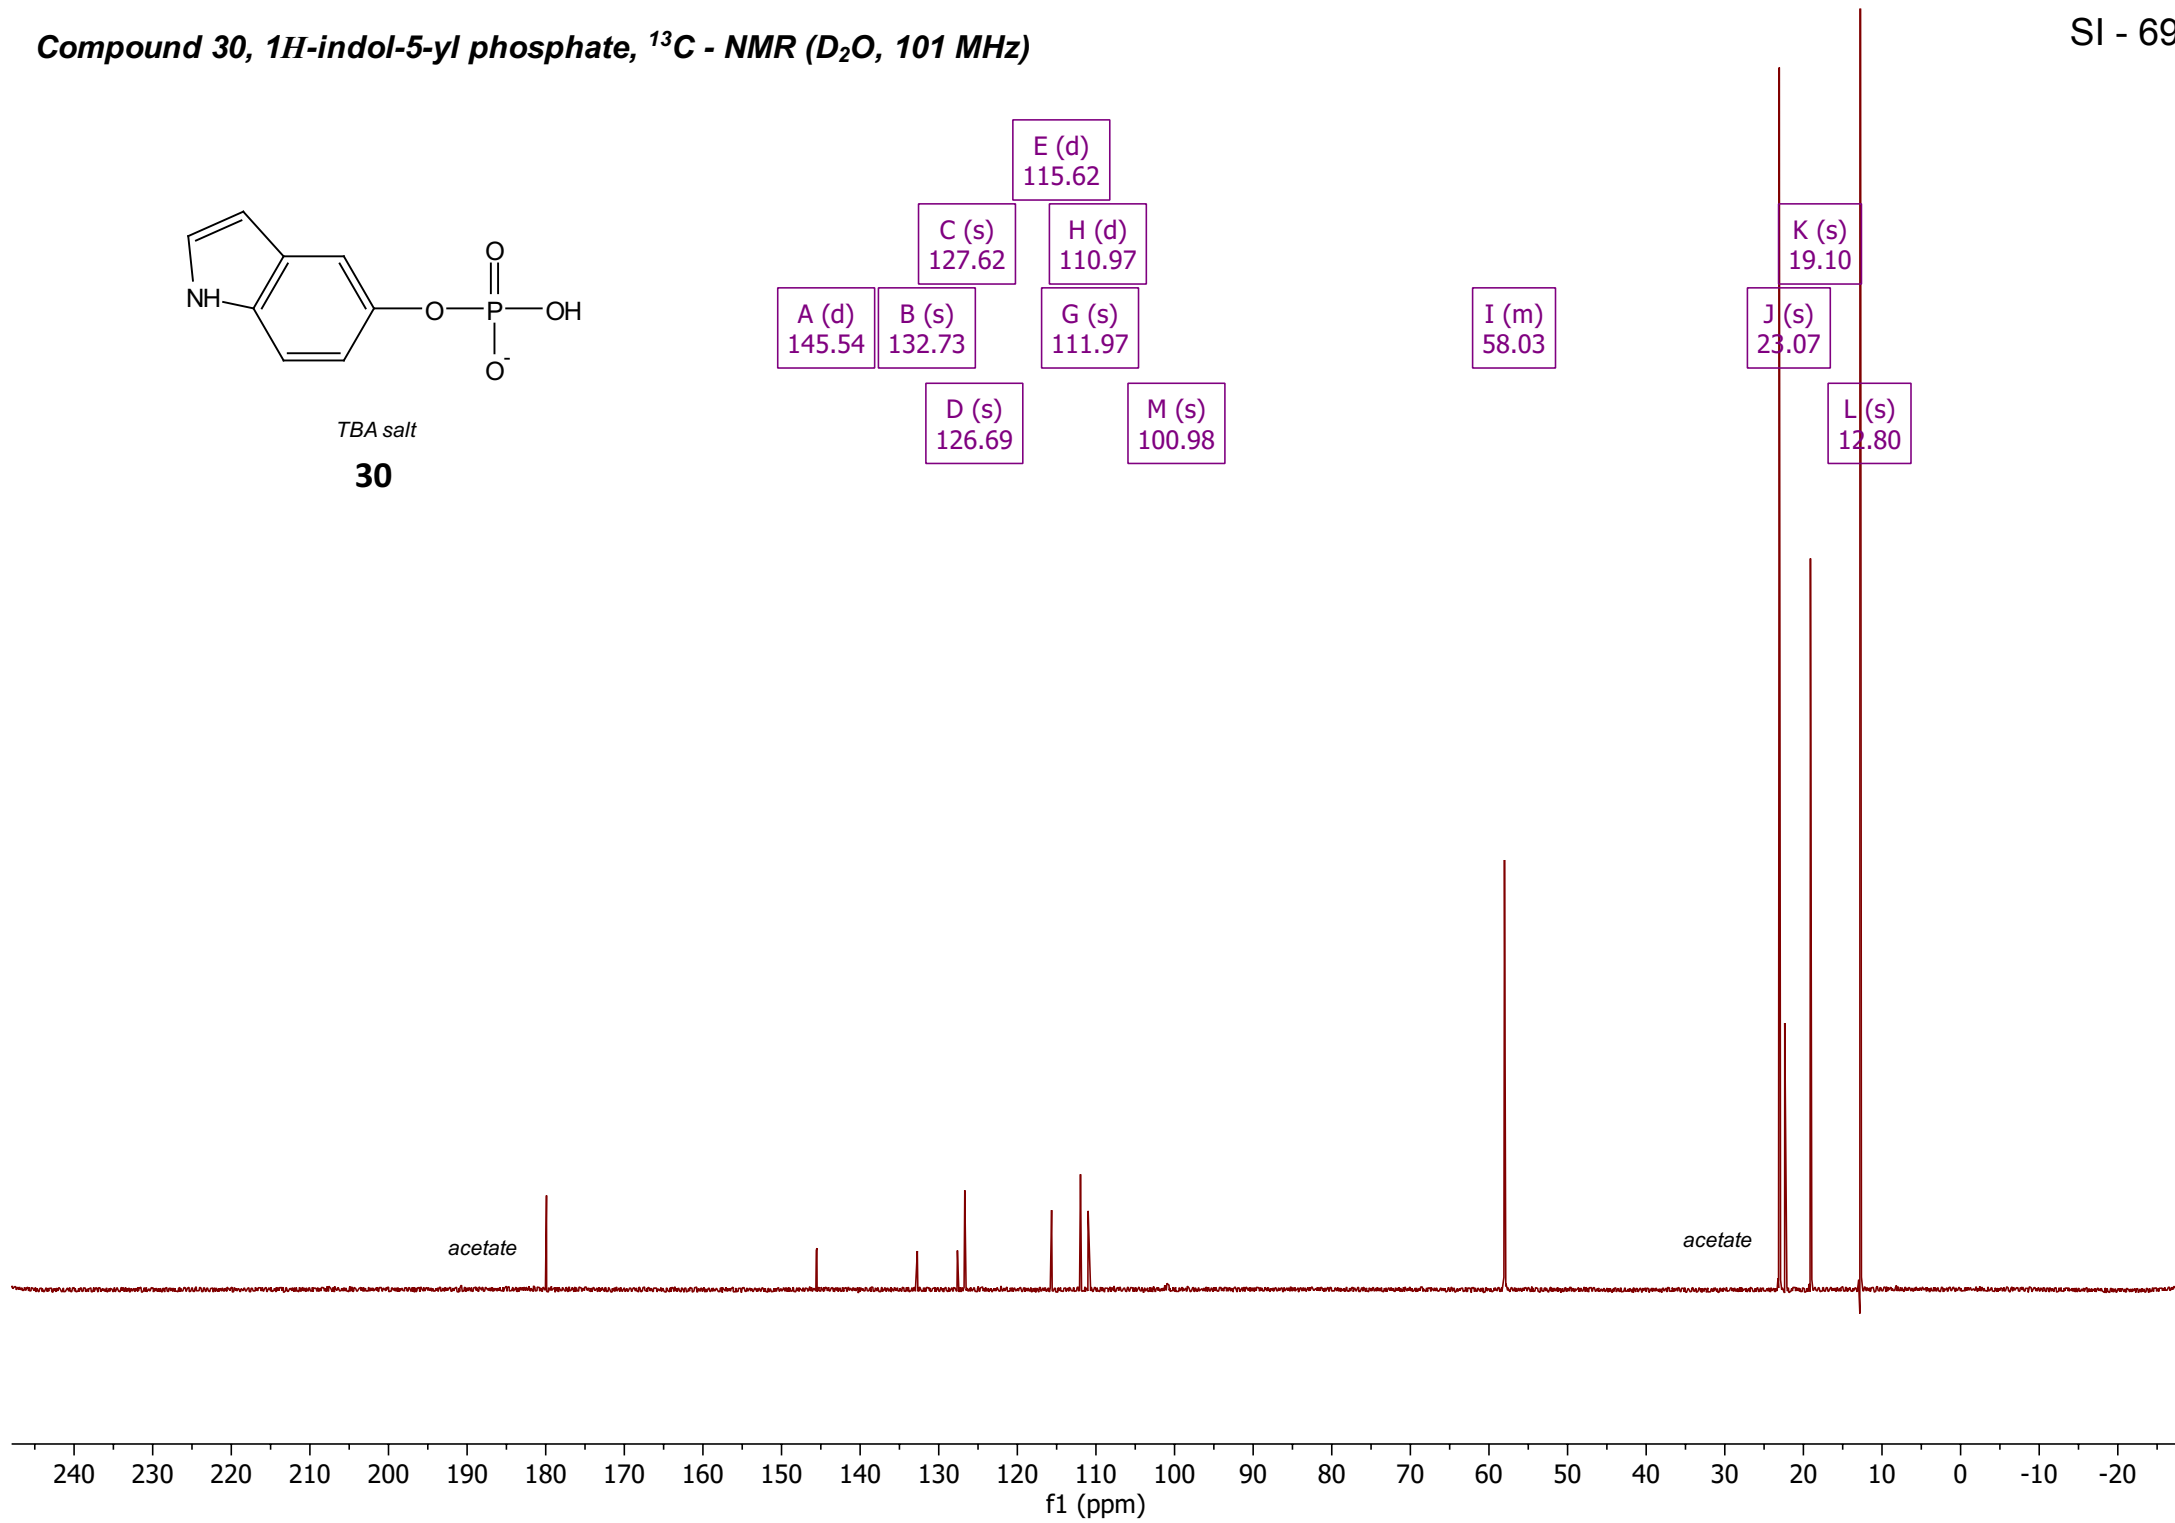



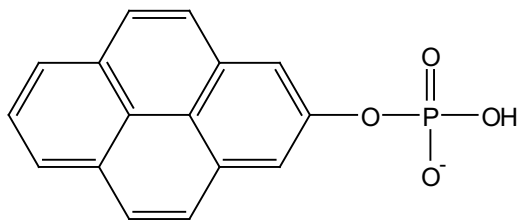

TBA salt

**31**

- G (m) 7.94
- D (dd) 8.13
- B (dd) 8.29
- A (d) 8.53
- F (s) 8.00
- C (m) 8.15
- E (m) 8.06

H (m) 3.04

I (m) 1.54

J (m) 1.30

K (t) 0.93

acetate

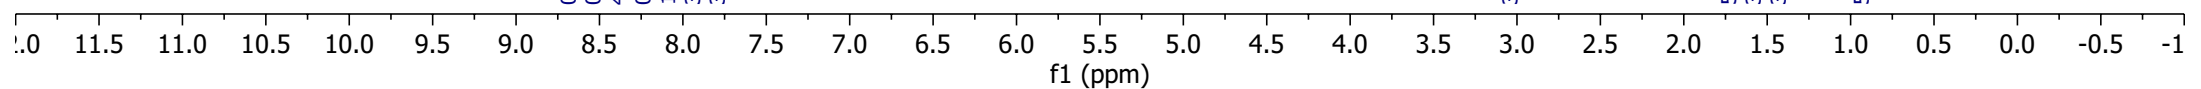

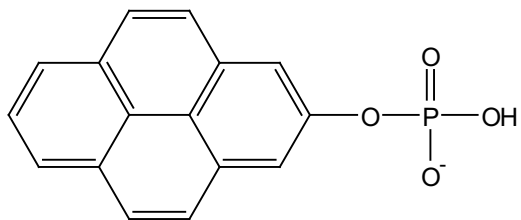

TBA salt

**31**

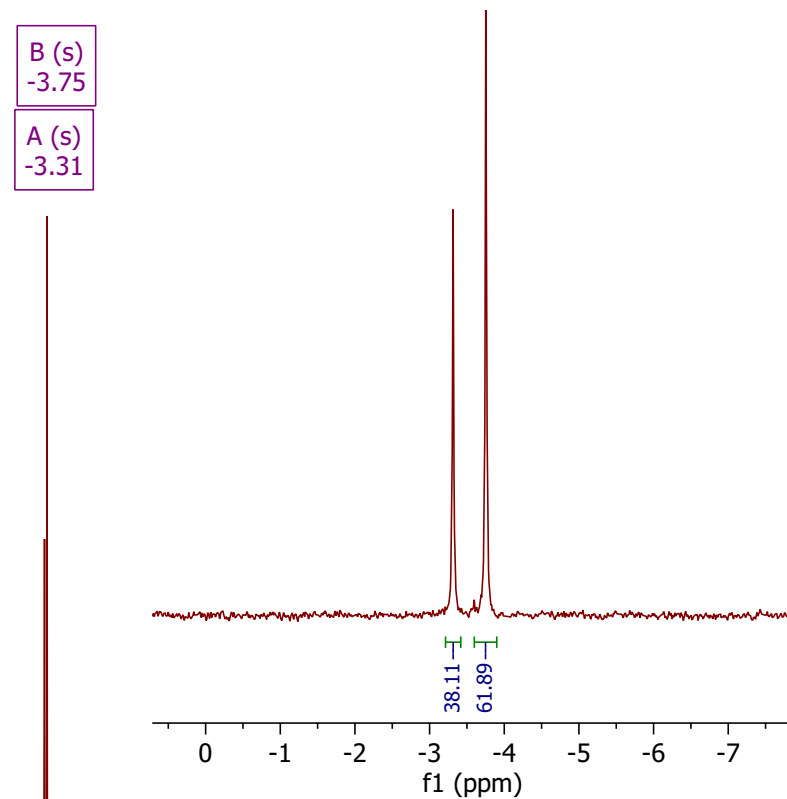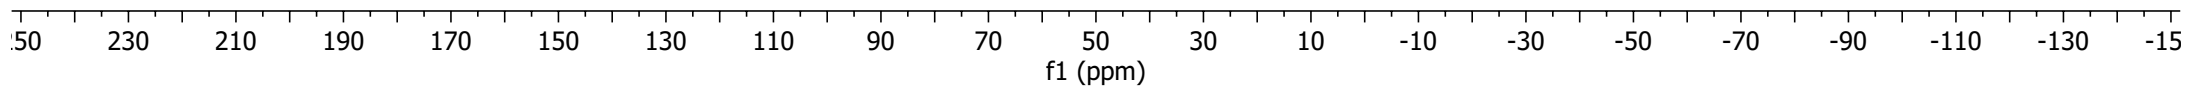

Compound 31, pyren-2-yl phosphate, <sup>13</sup>C - NMR (CD<sub>3</sub>CN, 101 MHz)

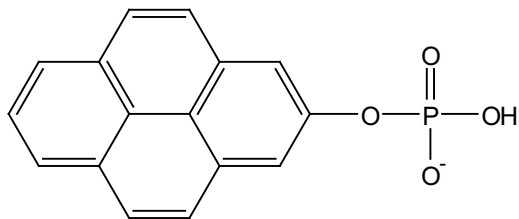

TBA salt

**31**

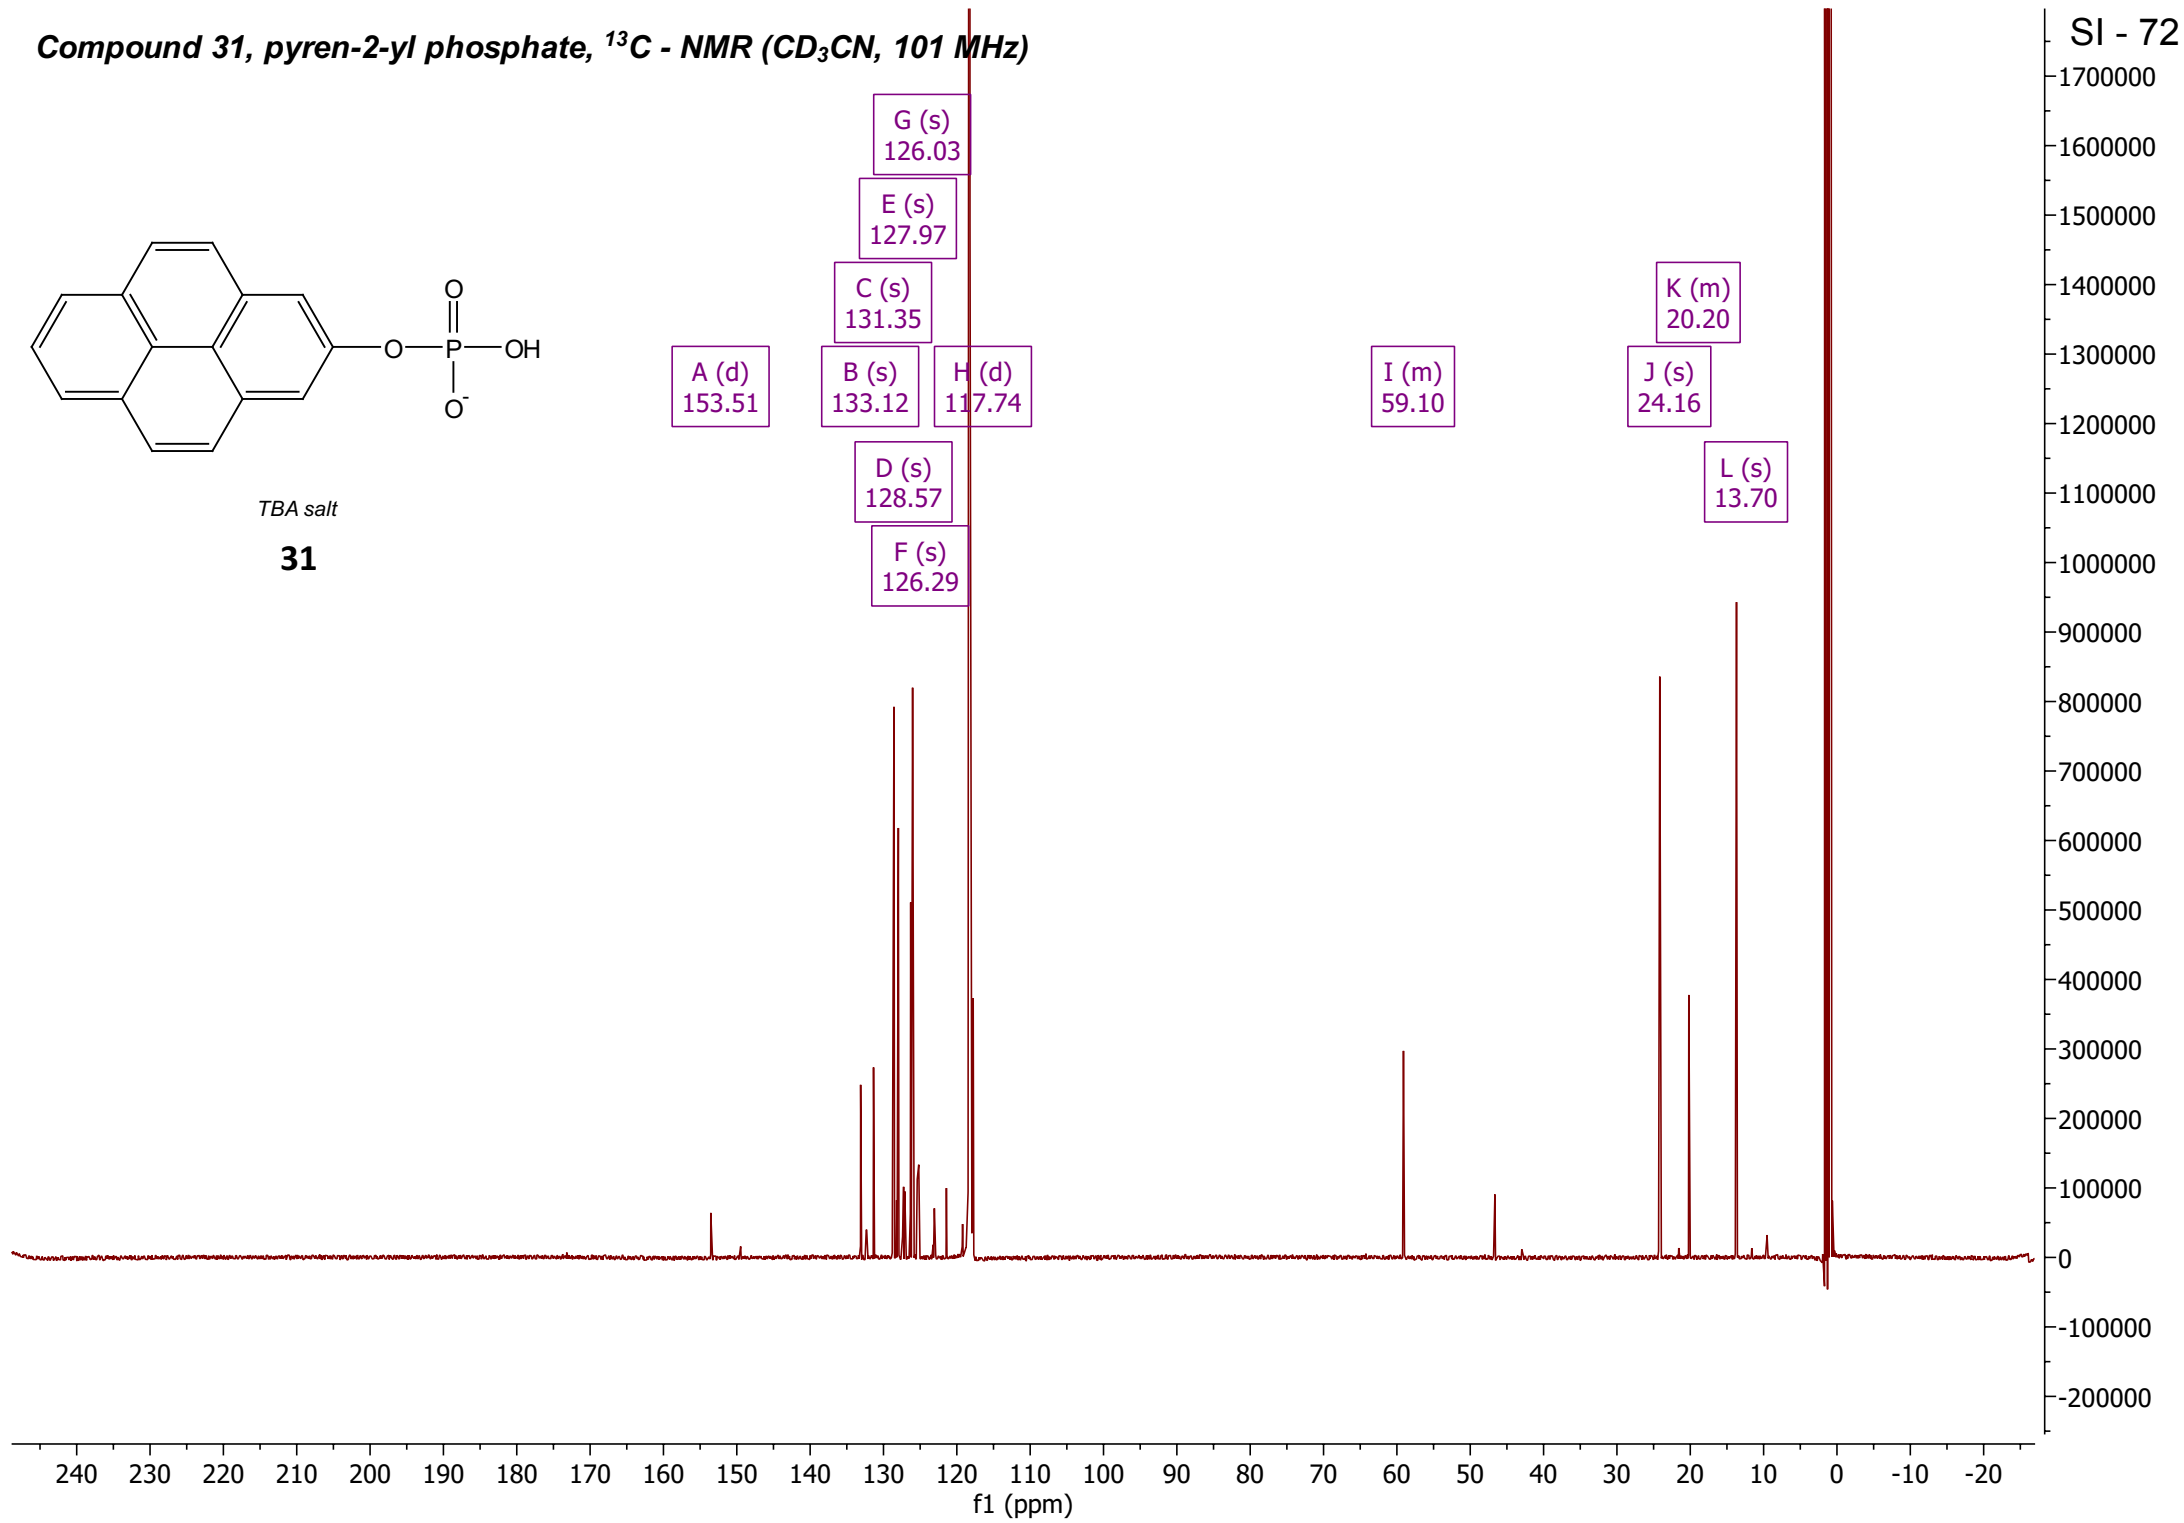

Compound 32, phenyl diphosphate, <sup>1</sup>H - NMR (D<sub>2</sub>O, 400 MHz)

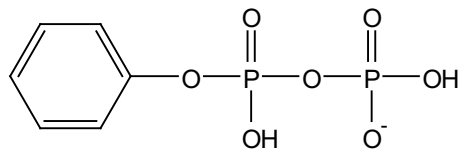

TBA/TEA salt

**32**

A (m) 7.42  
B (m) 7.26  
C (m) 3.20  
D (s) 1.98  
E (m) 1.66  
F (h) 1.37  
G (m) 1.28  
H (t) 0.96

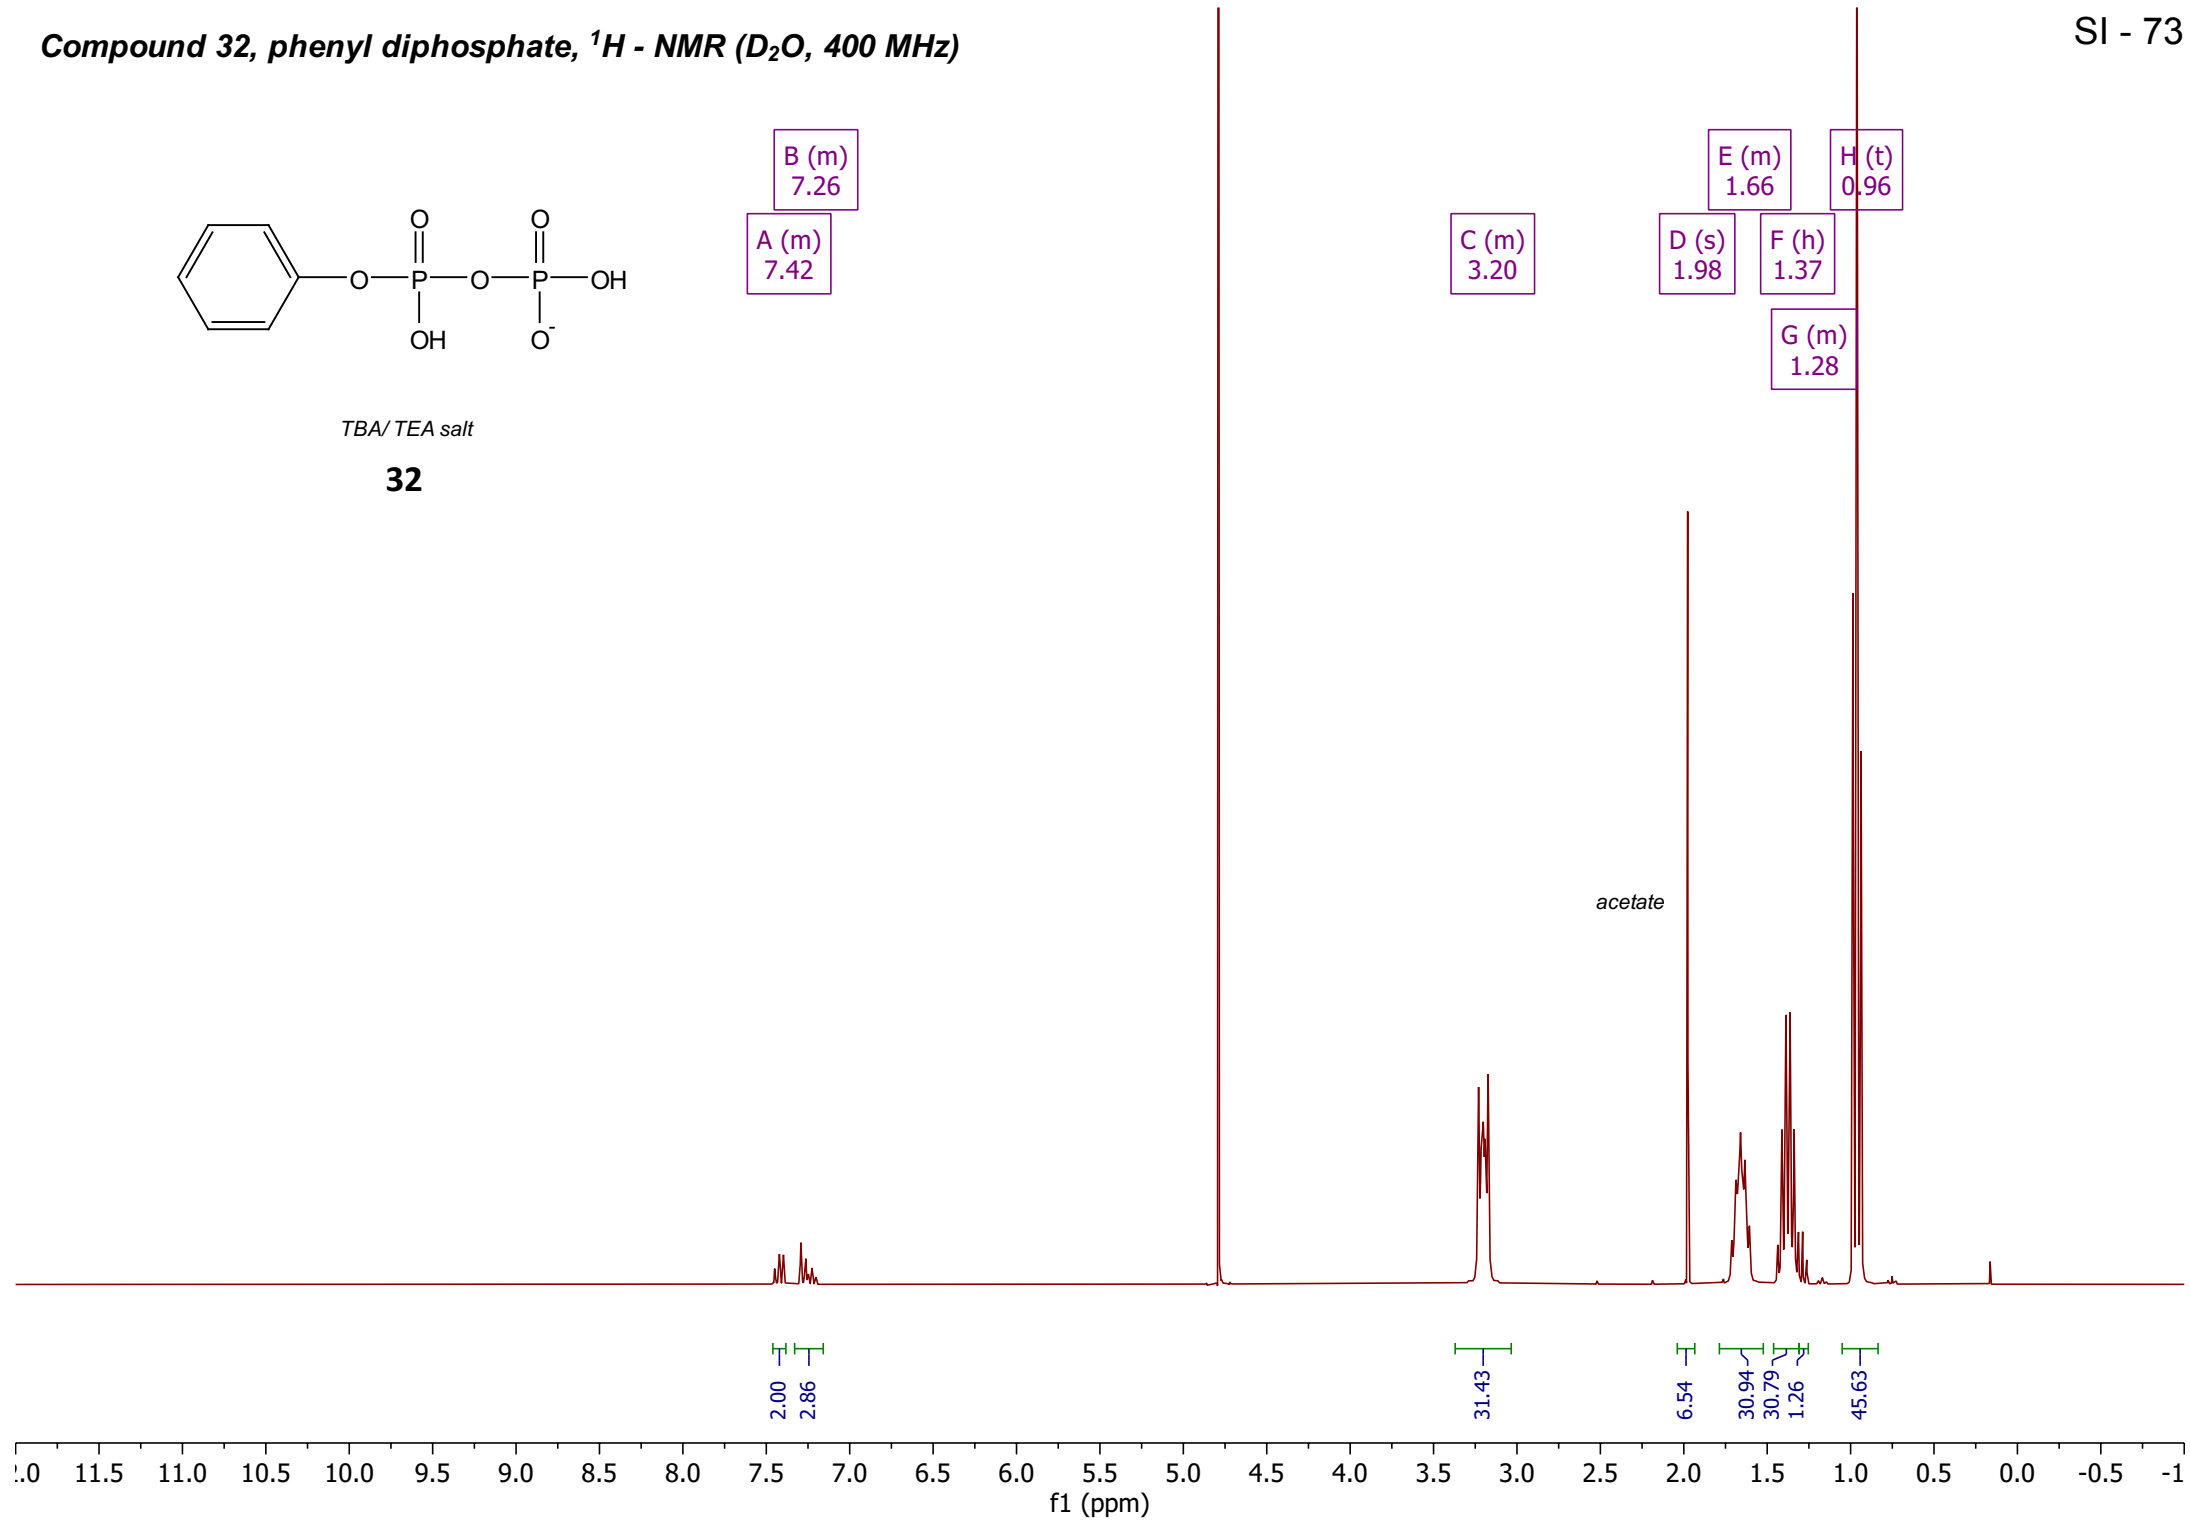



TBA/TEA salt

**32**

B (d)  
-15.80

A (d)  
-10.90

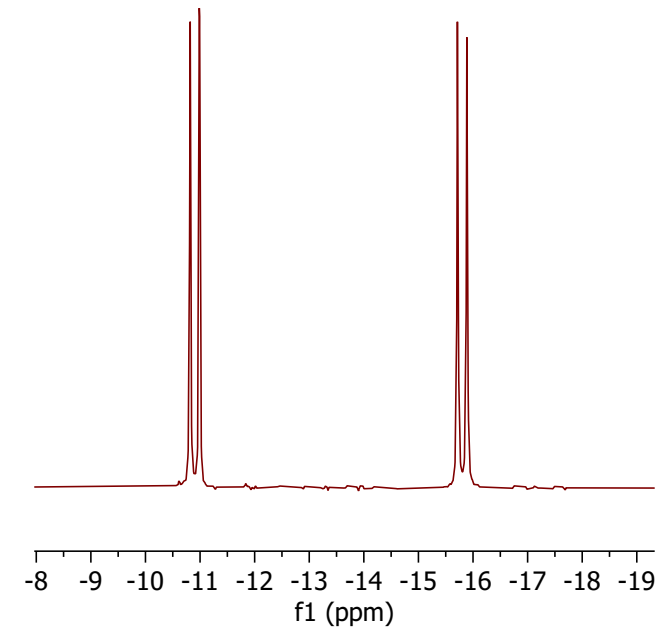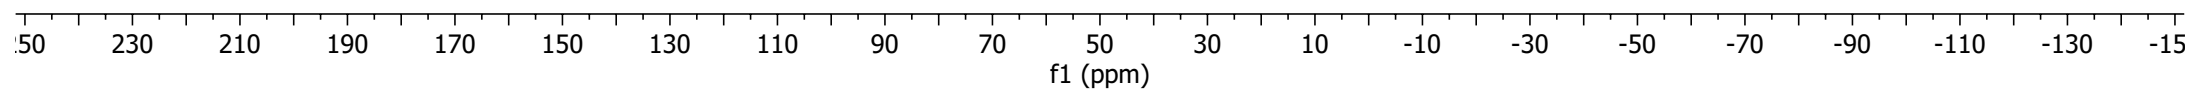



TBA/TEA salt

**32**

A (d)  
151.84

B (s)  
129.64

C (d)  
124.25

D (d)  
120.60

E (m)  
58.08

F (s)  
46.61

G (s)  
23.10

H (m)  
19.12

I (s)  
12.80

J (s)  
8.20

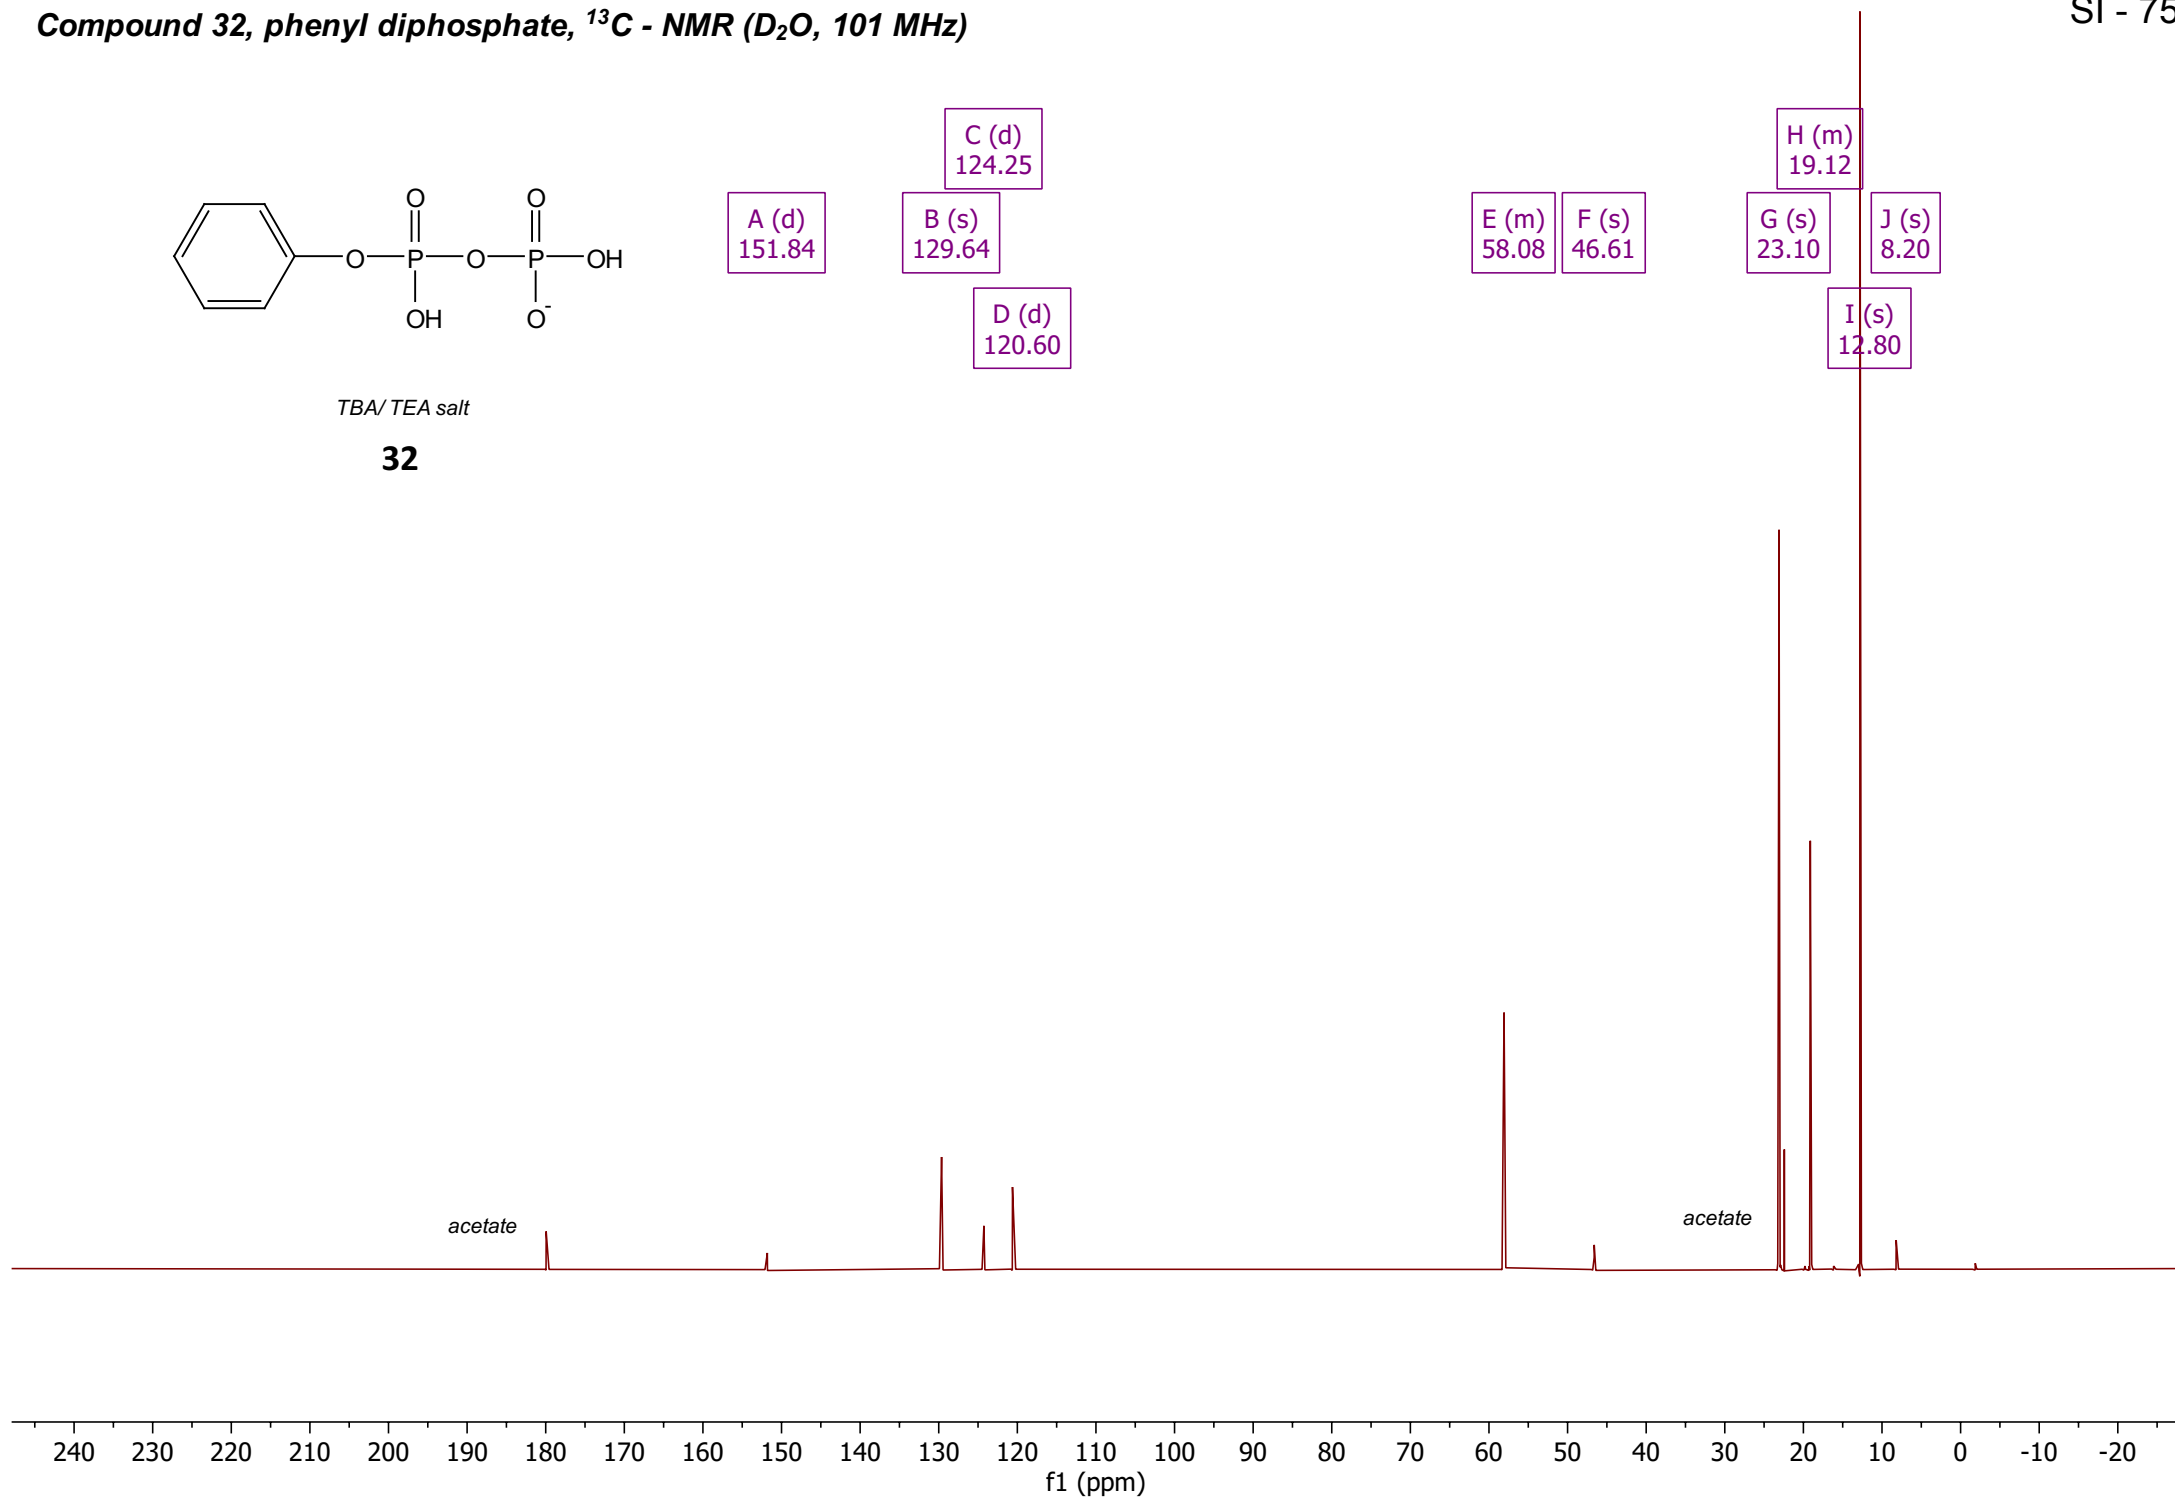

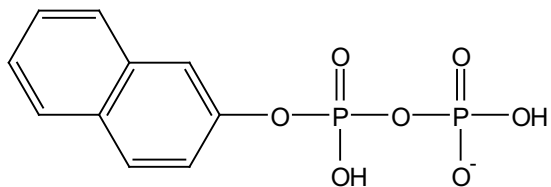

TBA salt

**33**

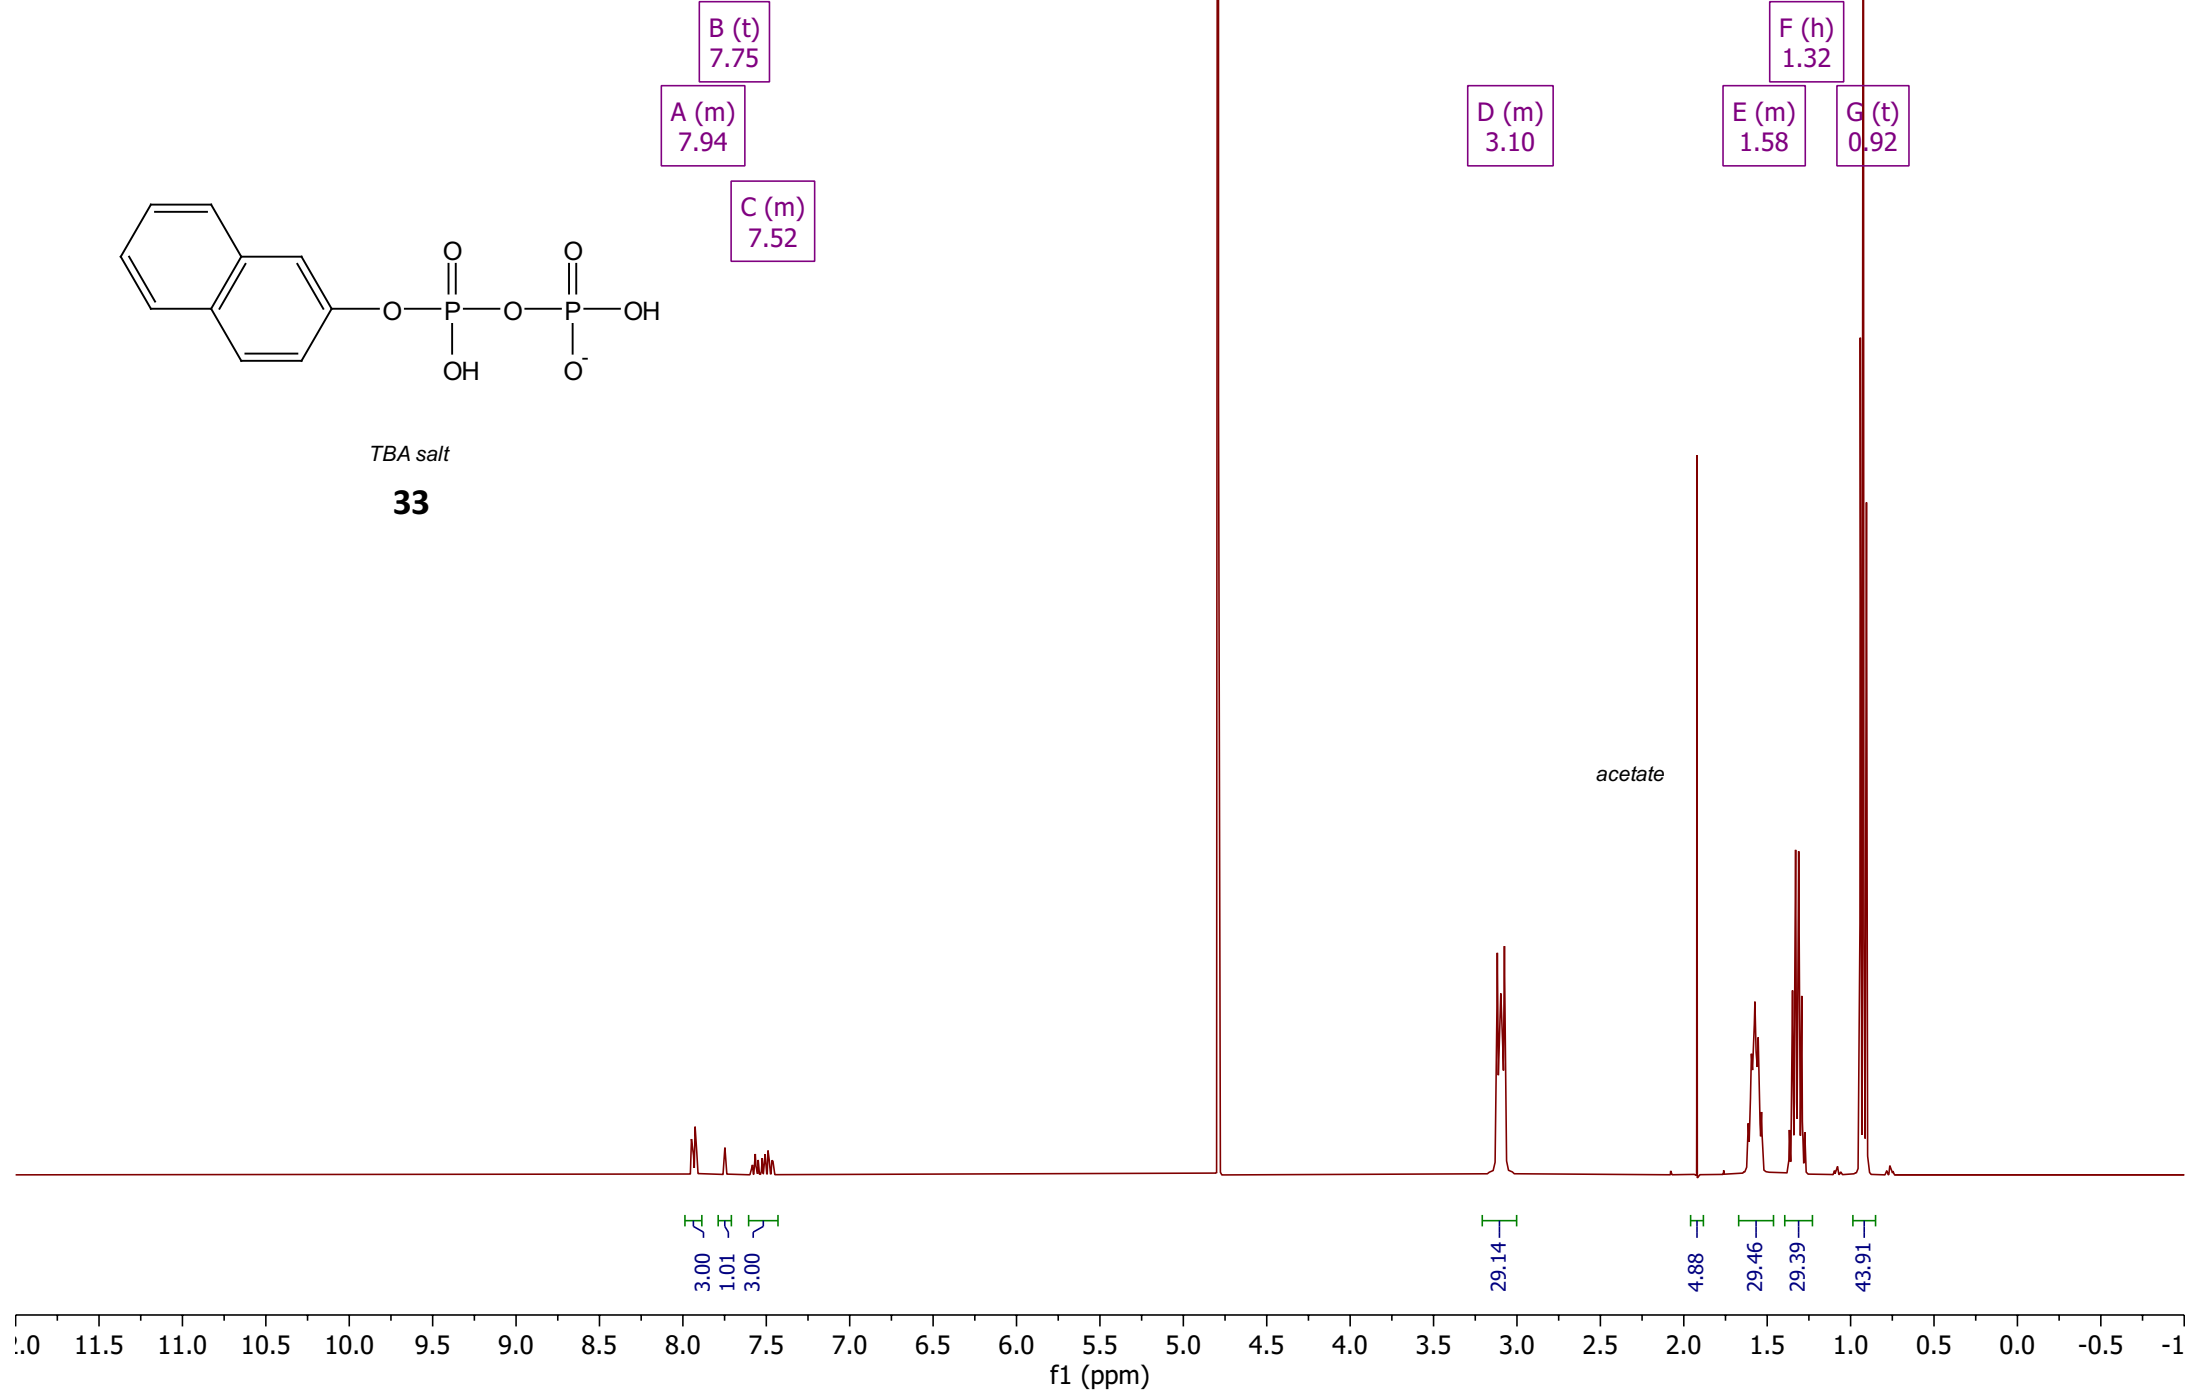

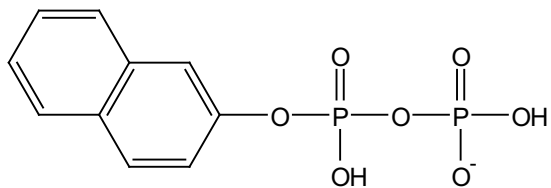

TBA salt

**33**

B (d)  
-15.94

A (d)  
-10.84

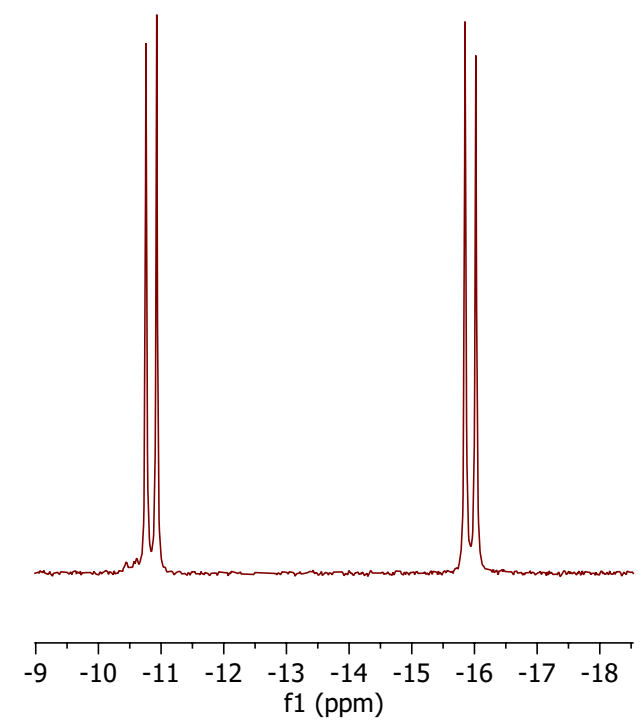



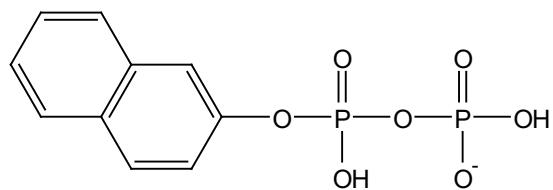

TBA salt

**33**

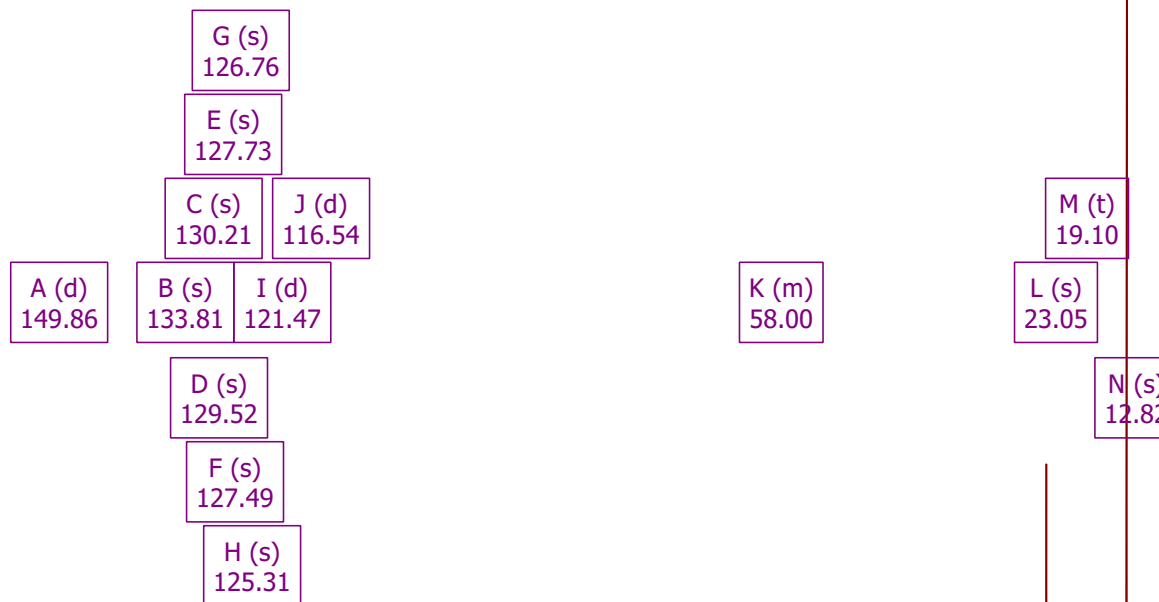

acetate

acetate

240 230 220 210 200 190 180 170 160 150 140 130 120 110 100 90 80 70 60 50 40 30 20 10 0 -10 -20  
f1 (ppm)

Compound 34, 3,4-dimethylphenyl diposphate, <sup>1</sup>H - NMR (D<sub>2</sub>O, 400 MHz)

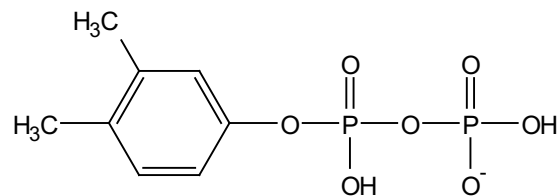

TBA salt

**34**

B (ddd)  
7.07

A (m)  
7.16

C (dddd)  
6.99

D (m)  
3.16

F (s)  
2.22

E (s)  
2.25

H (h)  
1.35

G (m)  
1.63

I (m)  
0.94

acetate

1.00  
0.96  
0.96

21.93

2.95  
2.89  
2.74

22.11

22.01

32.96

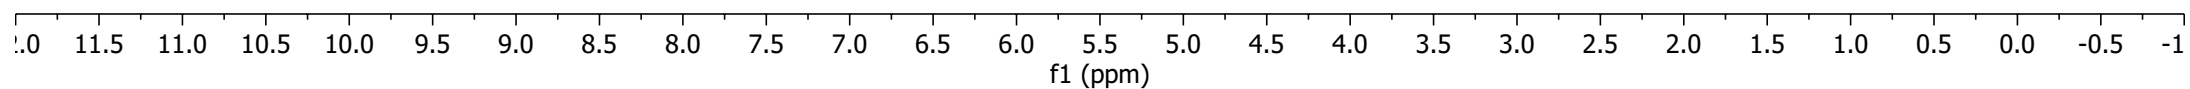

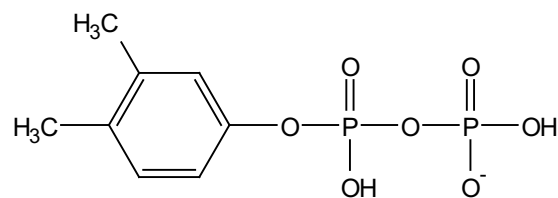

TBA salt

**34**

B (d)  
-15.72

A (d)  
-10.90

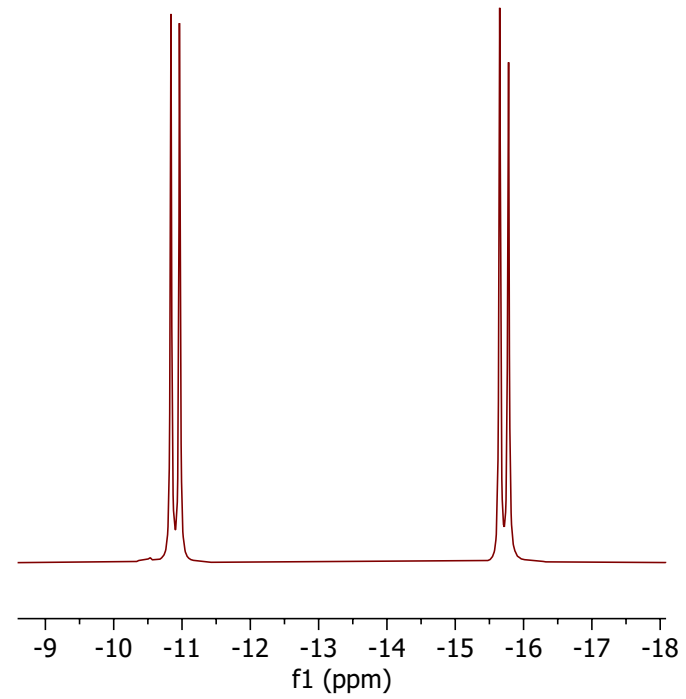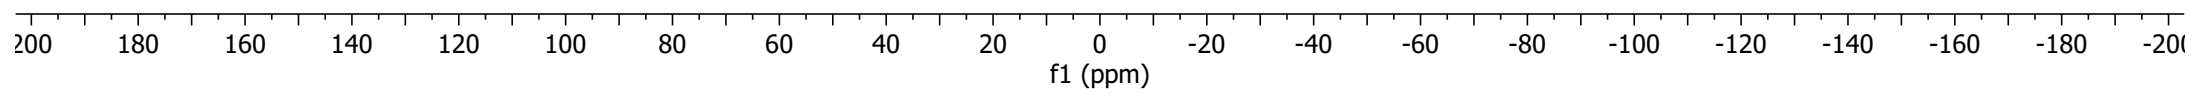

Compound 34, 3,4-dimethylphenyl diposphate, <sup>13</sup>C - NMR (D<sub>2</sub>O, 101 MHz)



TBA salt

**34**

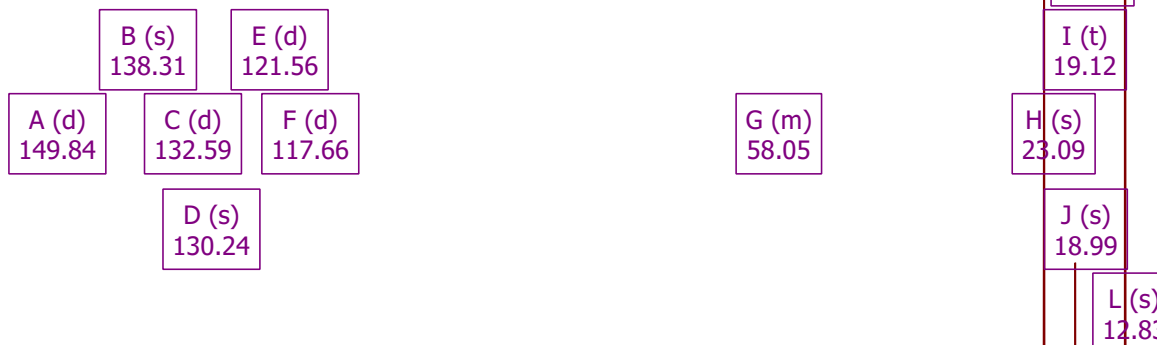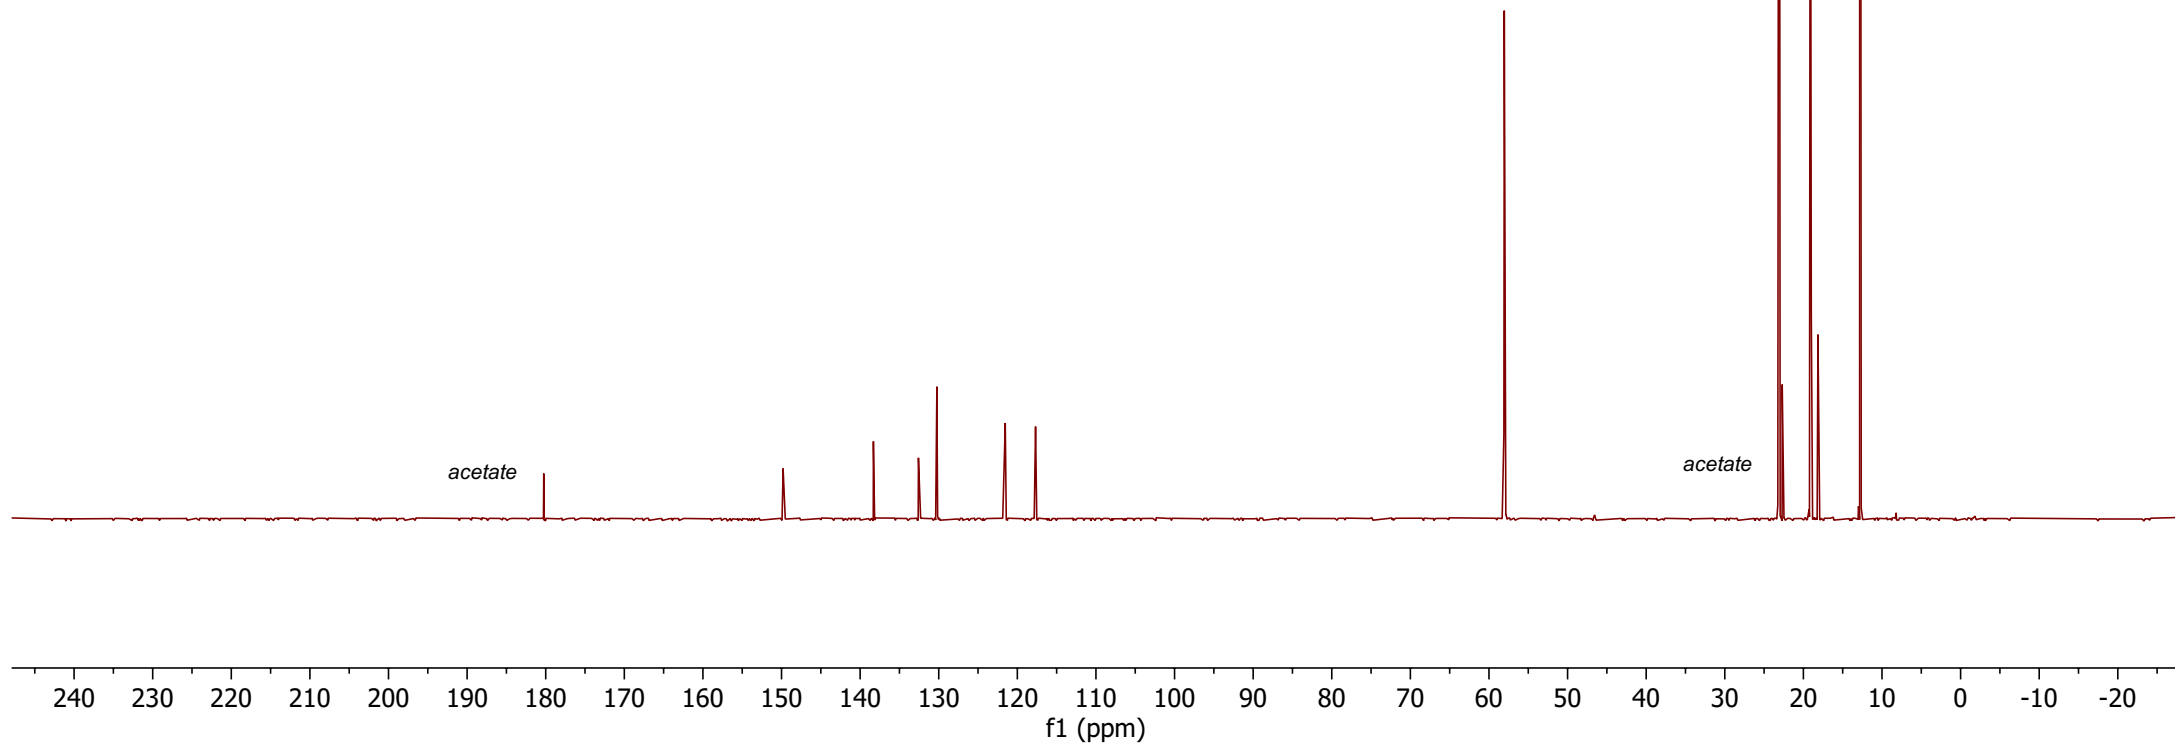

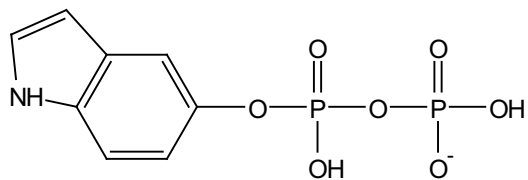

TBA/TEA salt

**35**

D (dddd)  
7.14

B (m)  
7.48

A (ddd)  
7.51

E (dd)  
6.58

C (m)  
7.41

F (m)  
3.15

H (h)  
1.36

G (dq)  
1.63

I (t)  
1.26

J (t)  
0.95

acetate

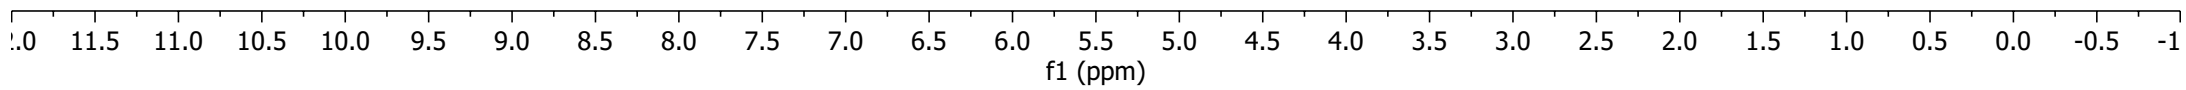



TBA/TEA salt

**35**

B (d)  
-15.01

A (d)  
-10.74

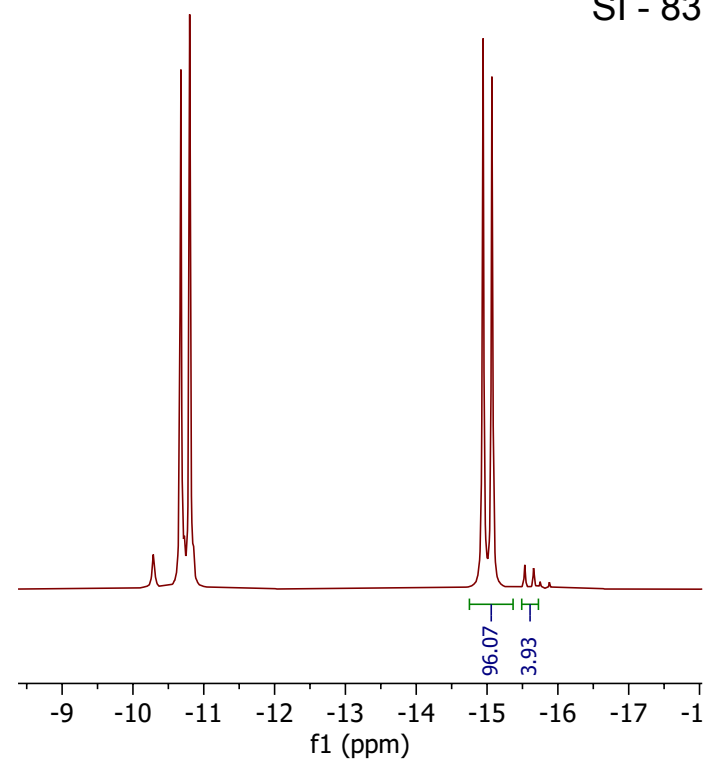



TBA/TEA salt

**35**

|        |        |        |        |        |        |
|--------|--------|--------|--------|--------|--------|
| A (d)  | B (s)  | C (s)  | E (d)  | F (s)  | H (s)  |
| 145.44 | 132.80 | 127.58 | 115.72 | 111.92 | 101.30 |
|        | D (s)  | G (d)  |        |        |        |
|        | 126.62 | 111.18 |        |        |        |

I (m)  
58.03

J (s)  
23.07

K (t)  
19.11

L (s)  
12.82

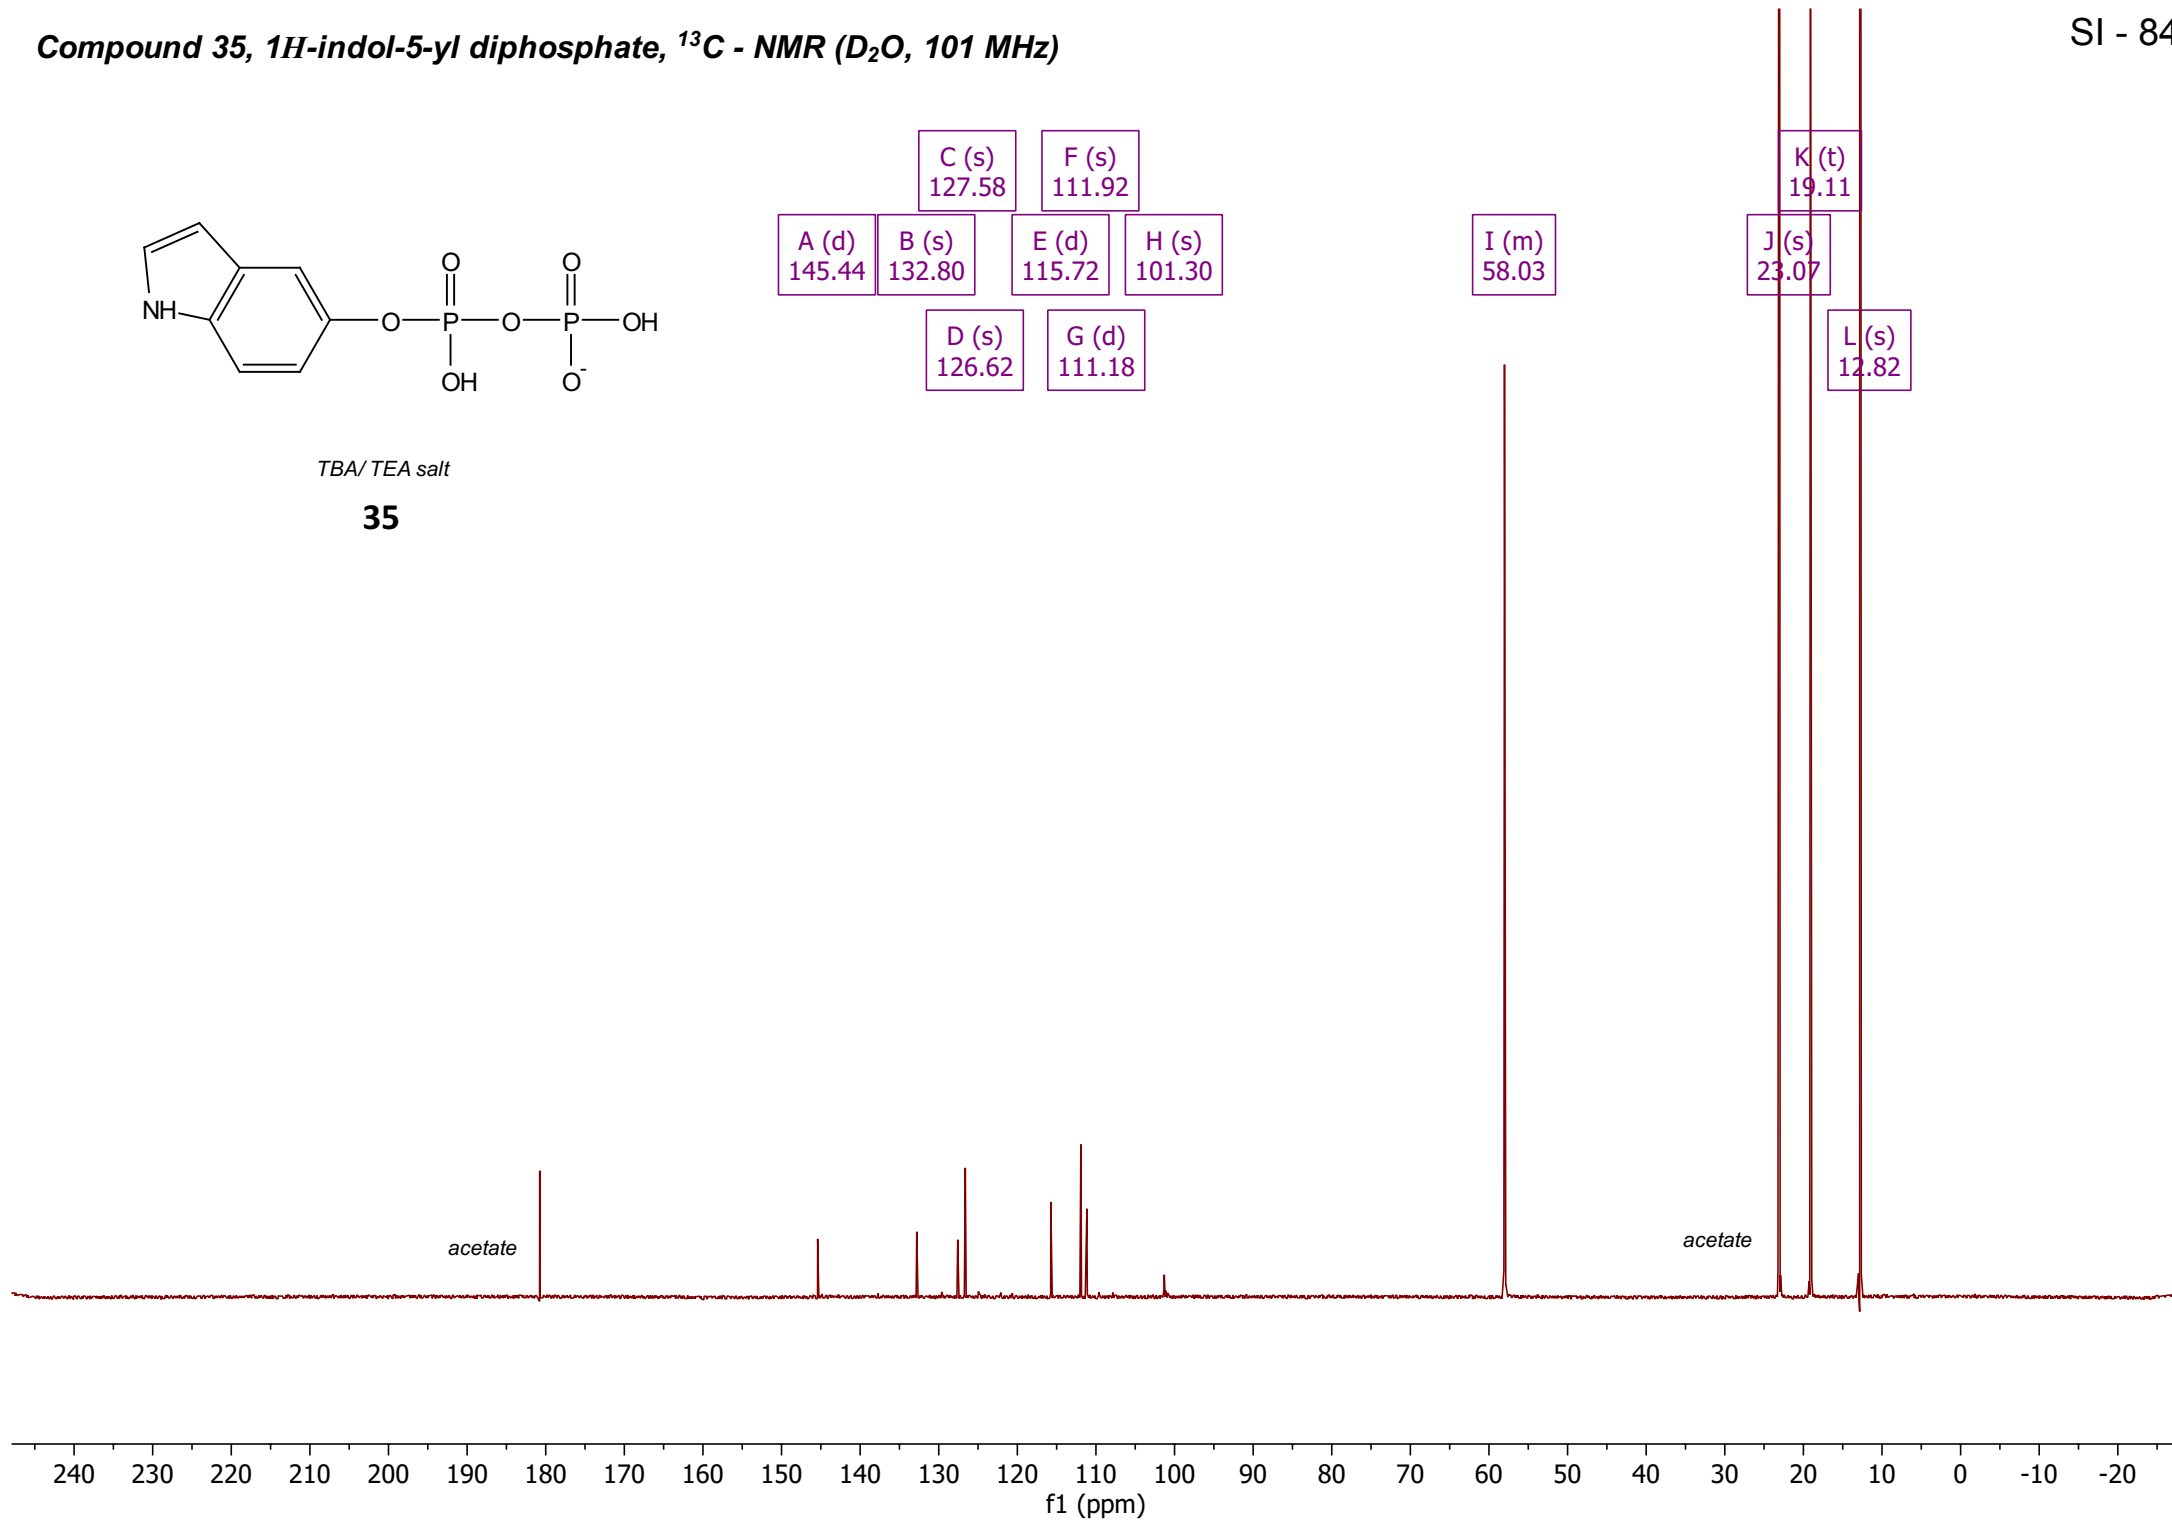

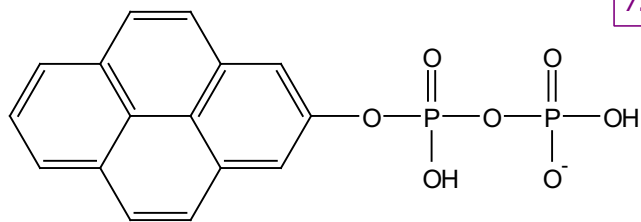

TBA salt

**36**

D (t)  
7.71

B (d)  
8.07

A (m)  
8.15

C (t)  
7.91

E (m)  
2.76

G (h)  
1.14

F (m)  
1.28

H (t)  
0.81

acetate





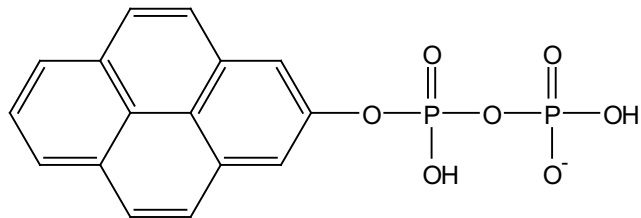

TBA salt

**36**

B (d)  
-16.18

A (d)  
-10.63

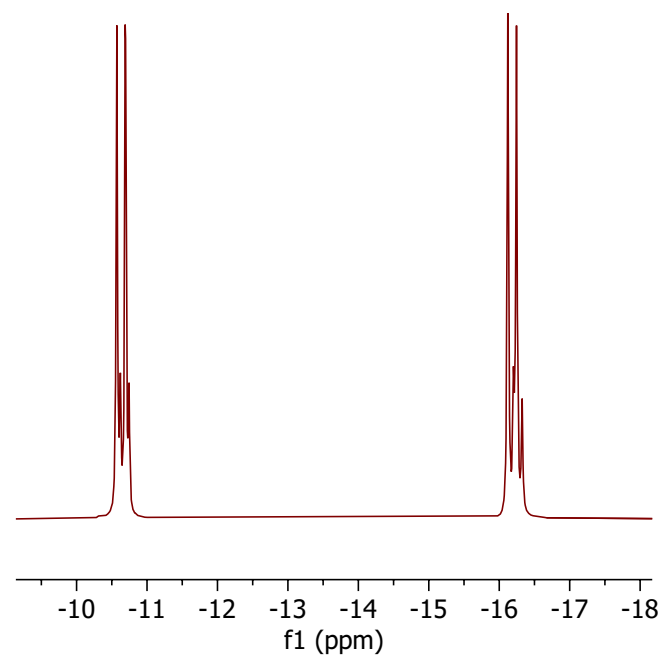

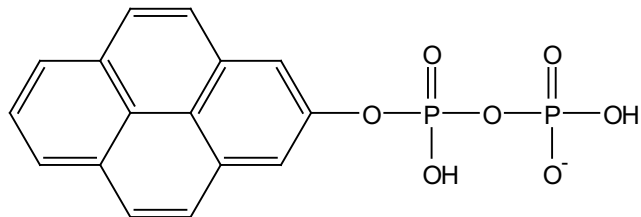

TBA salt

**36**

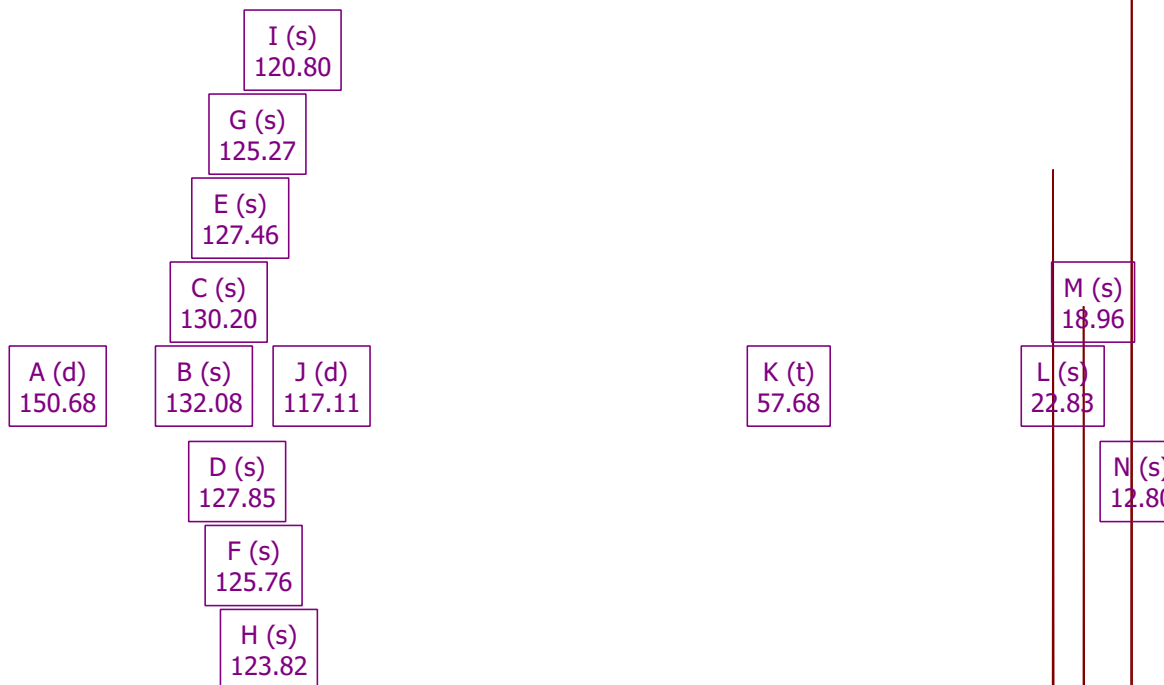

acetate

acetate

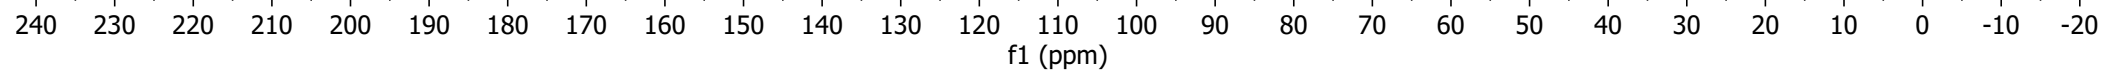

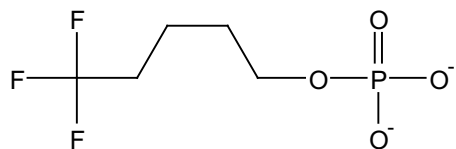

TBA/TEA - salt

**38**

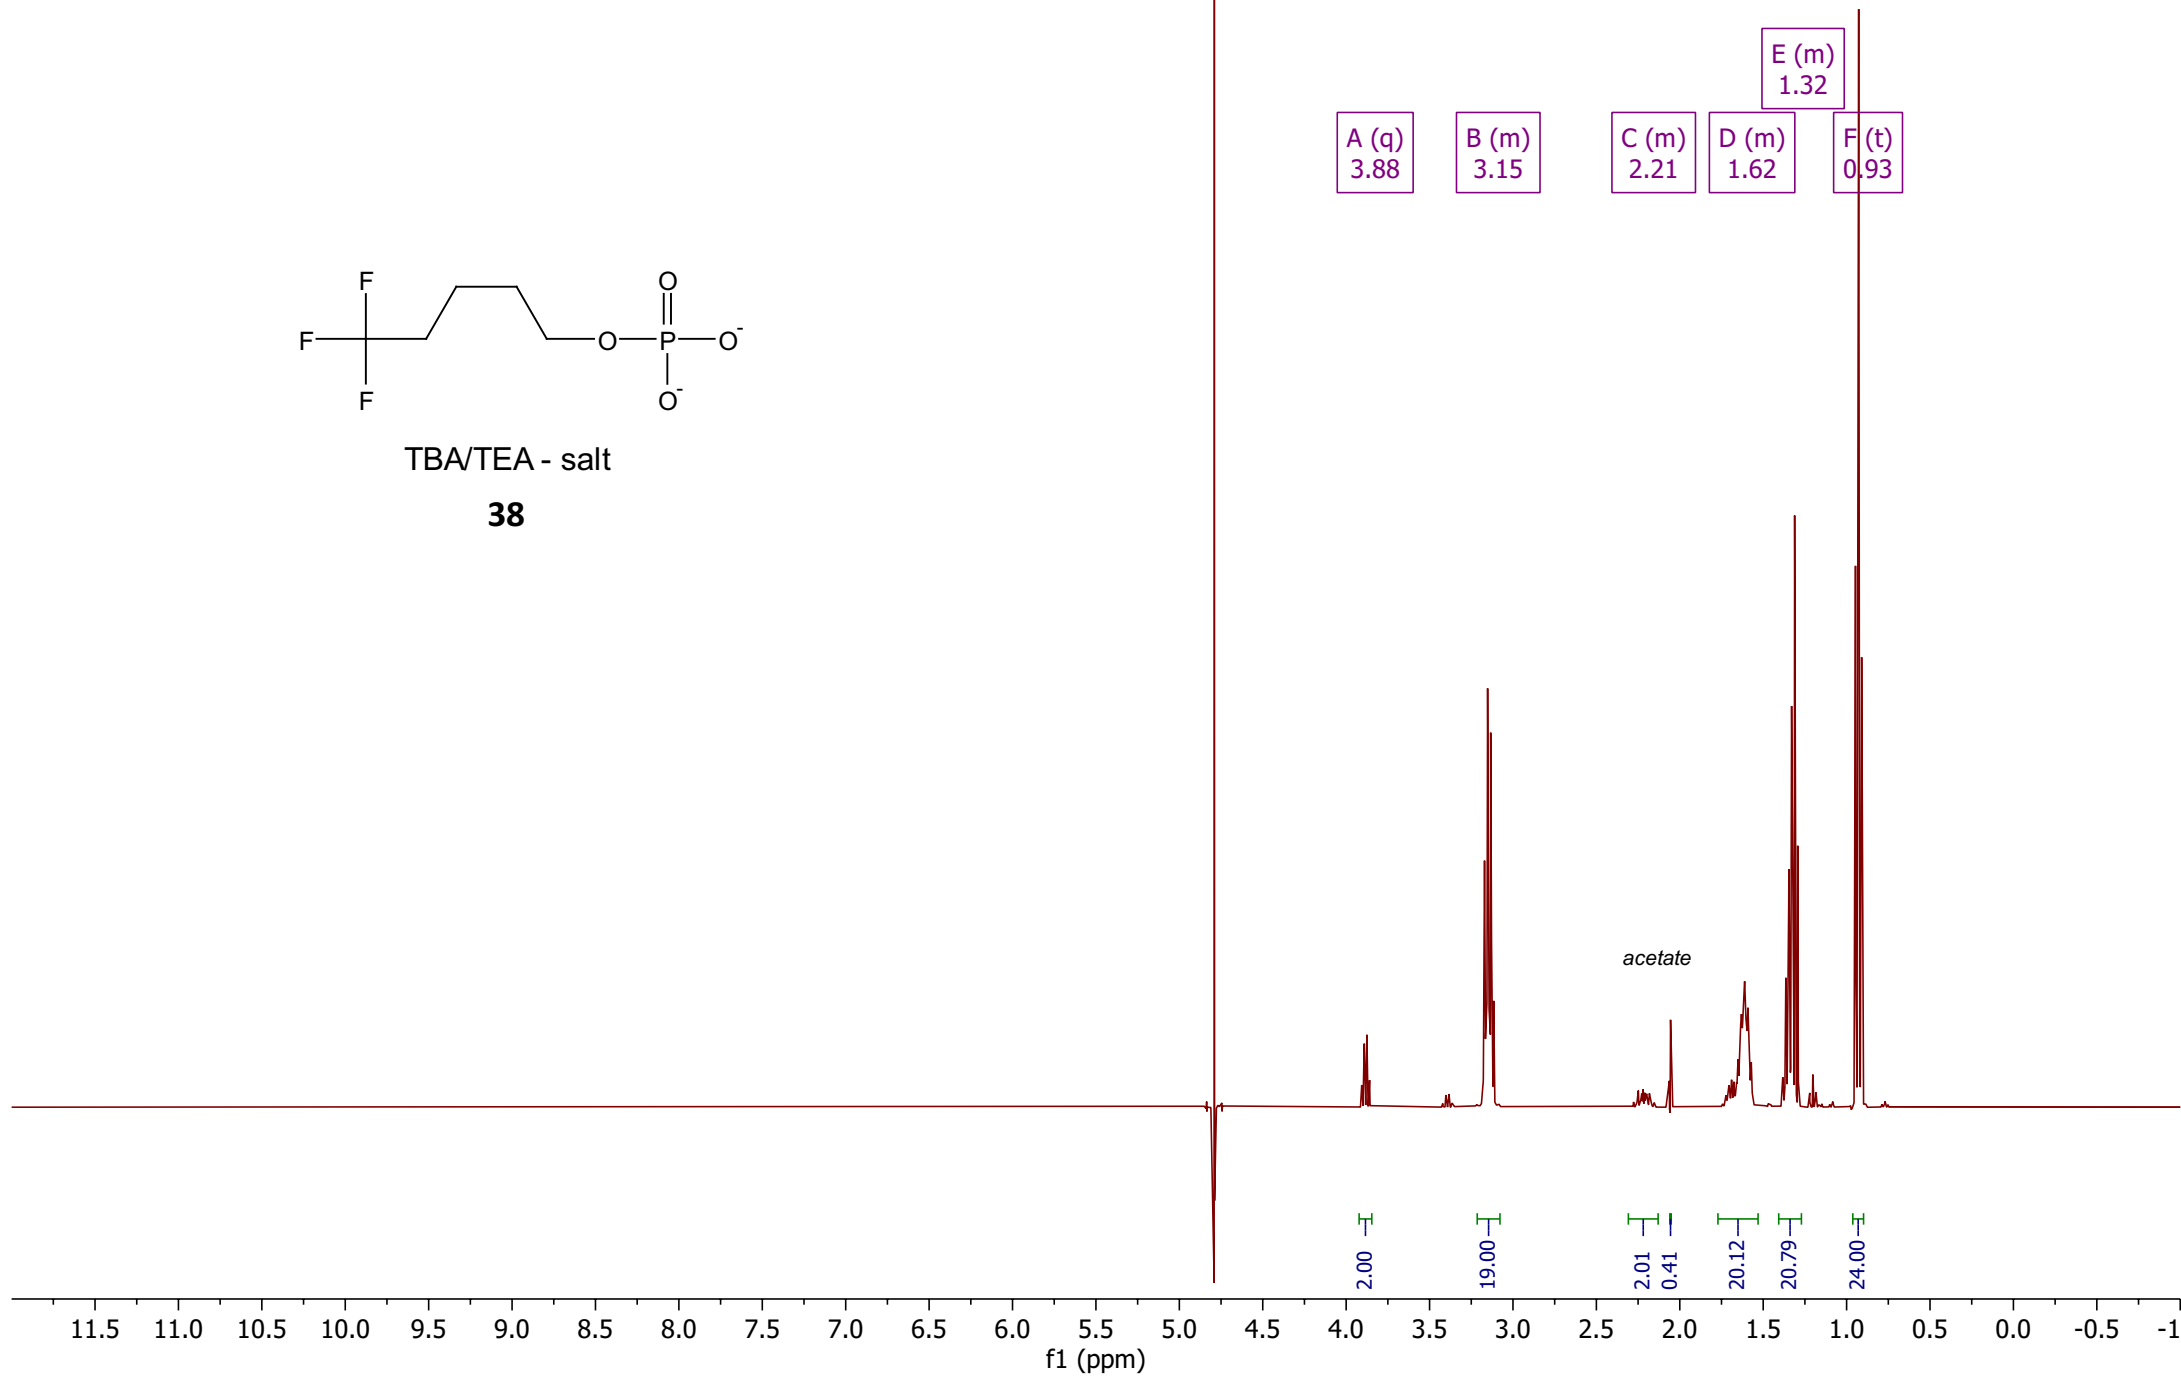

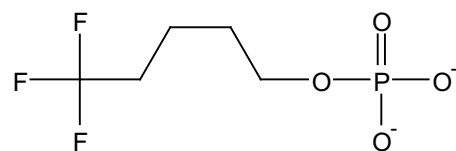

TBA/TEA - salt

**38**

A (t)  
-66.06

A (t)  
-66.06

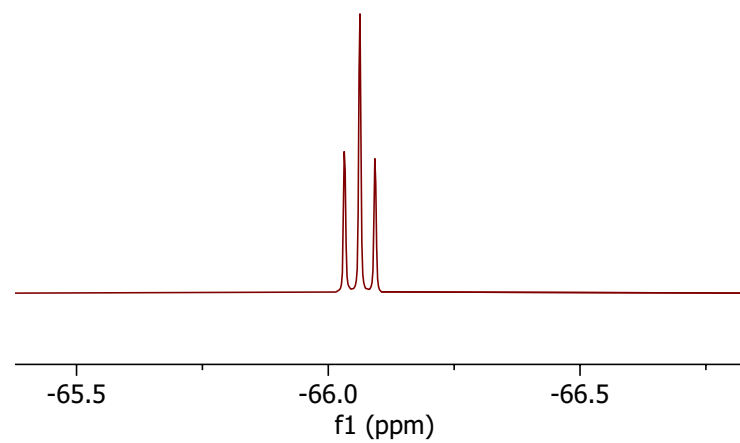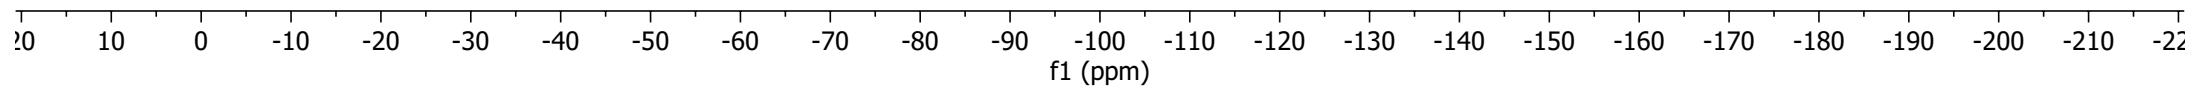

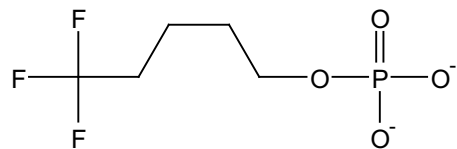

TBA/TEA - salt

**38**

A (s)  
0.41

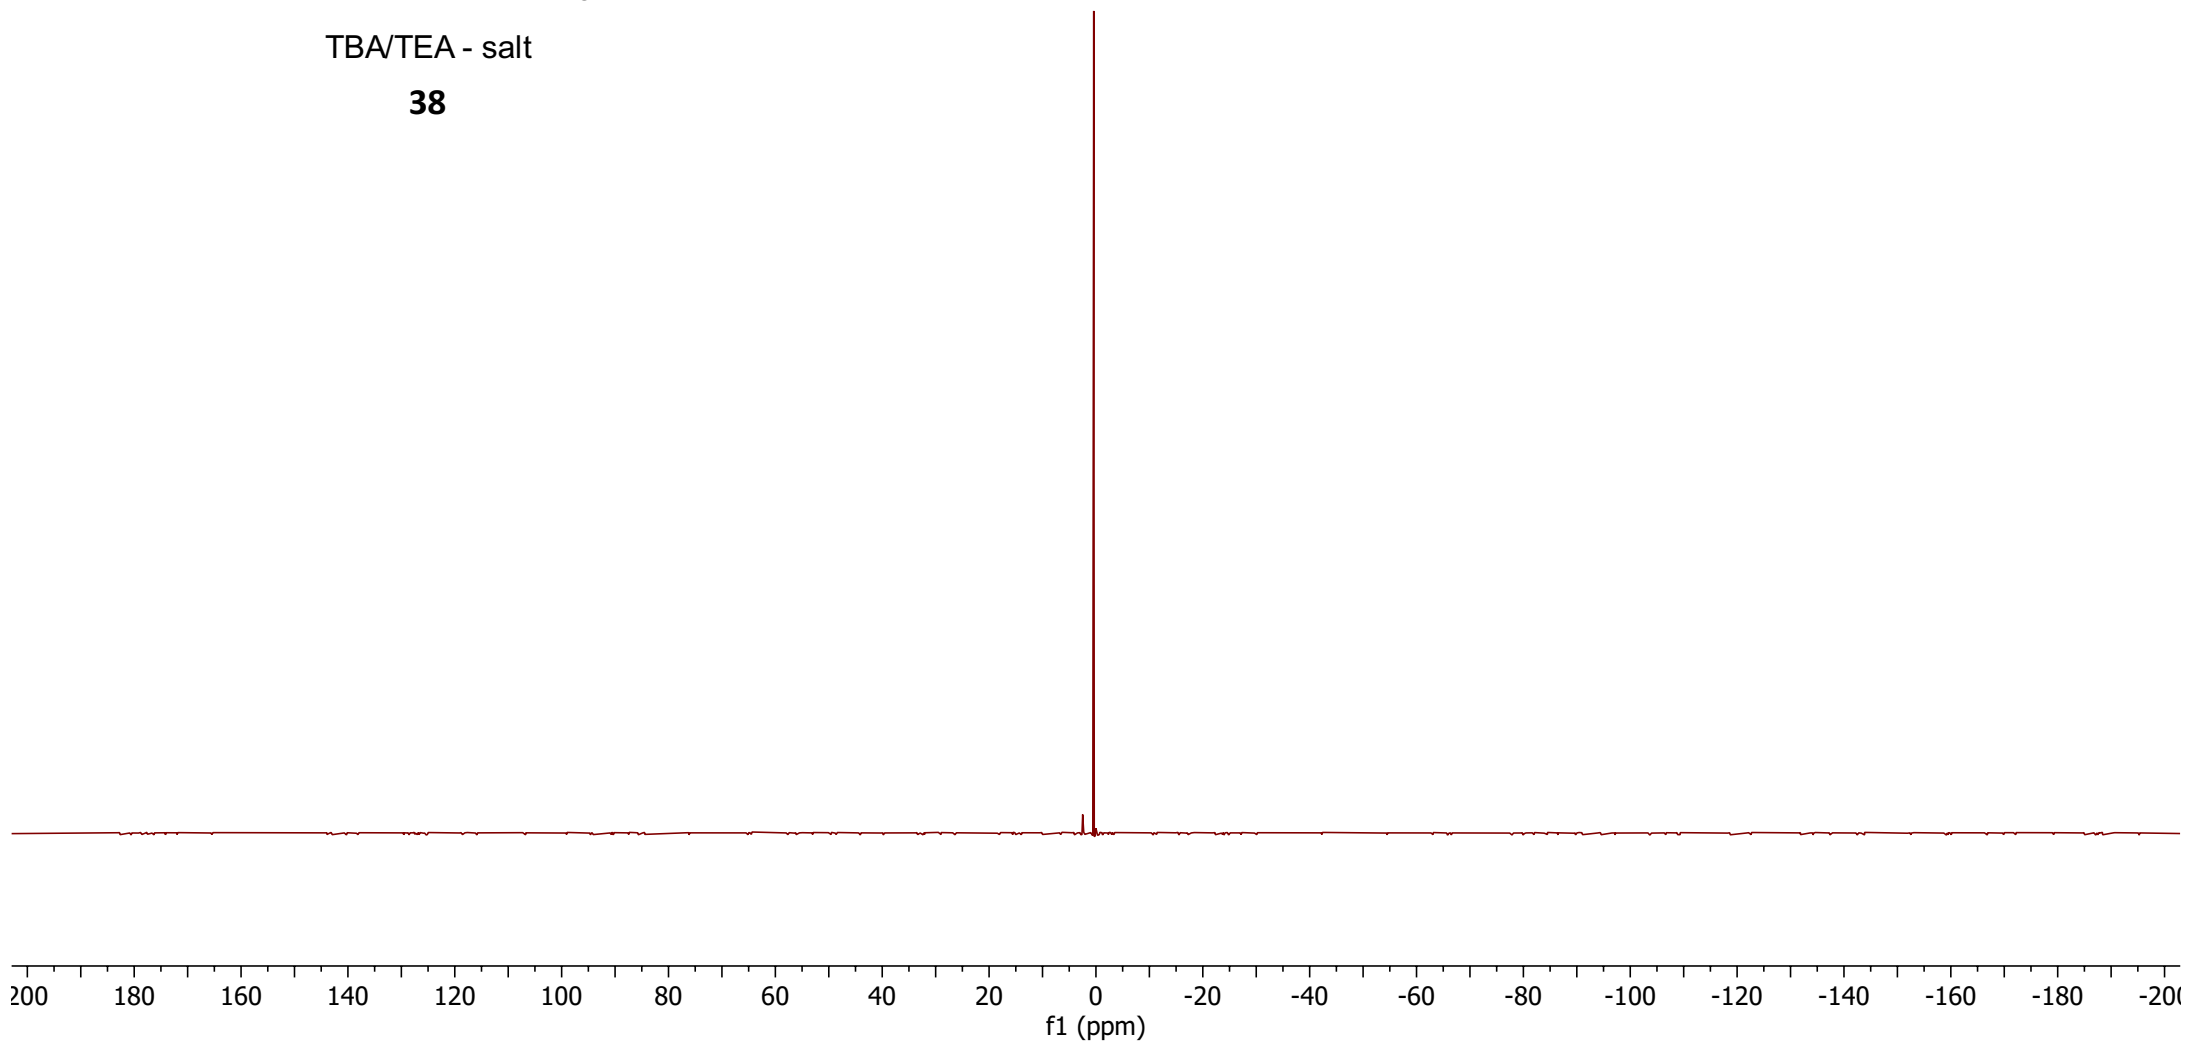



TBA/TEA - salt

**38**

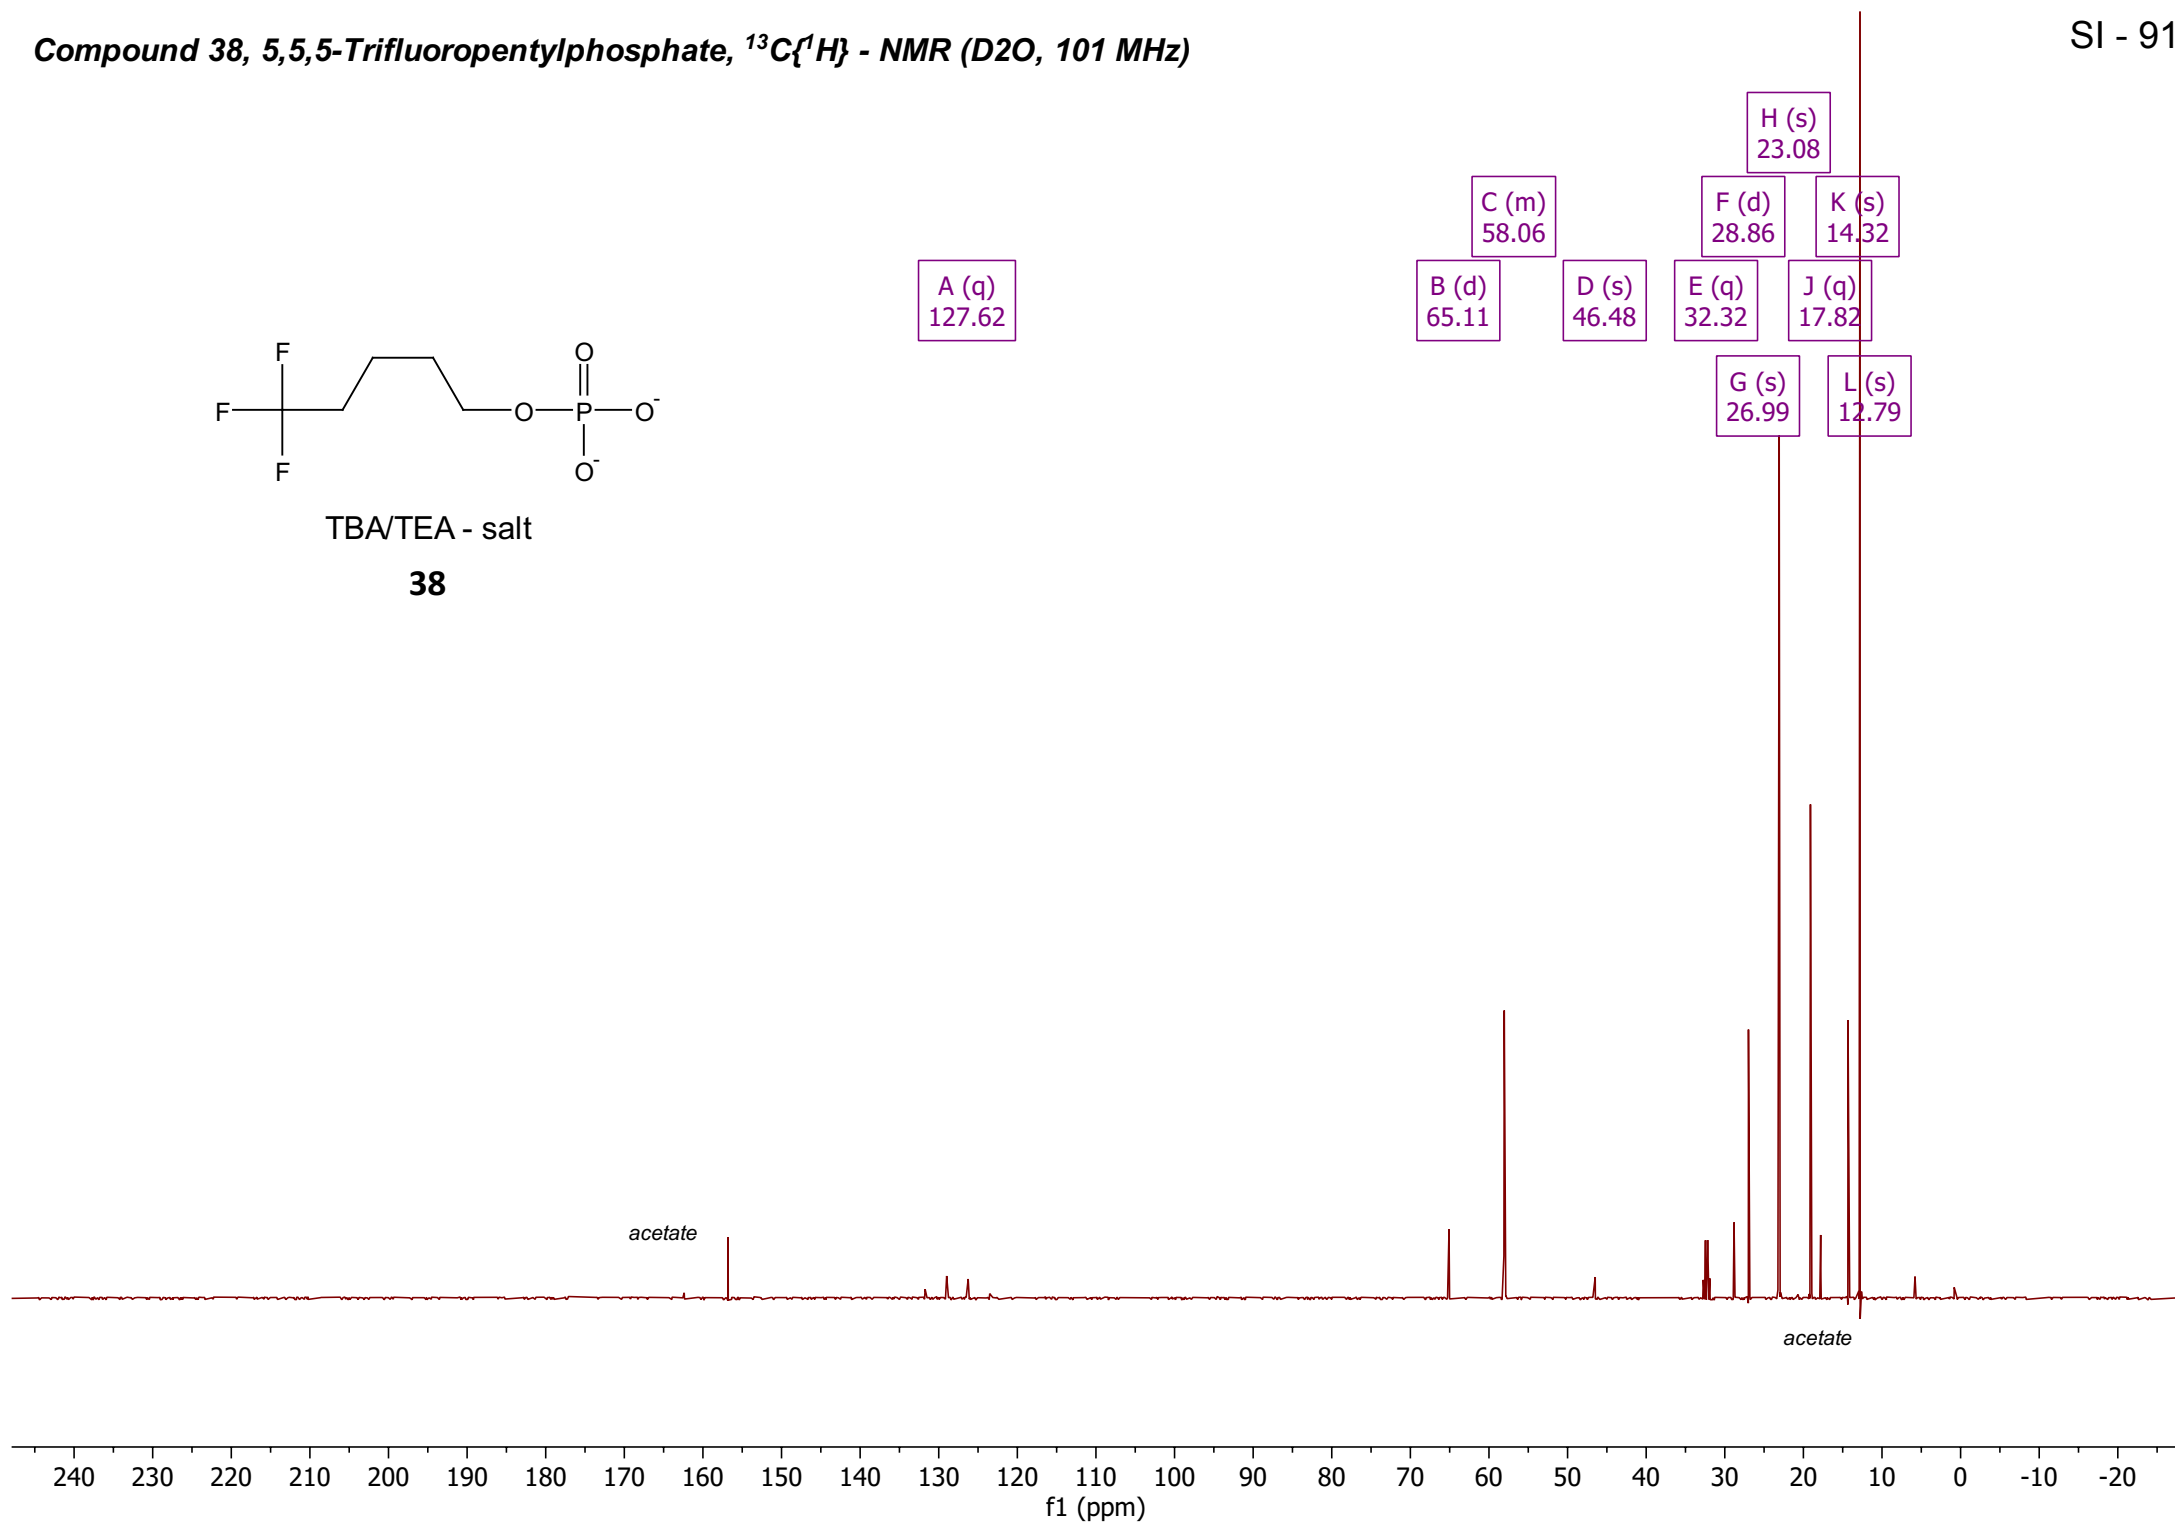

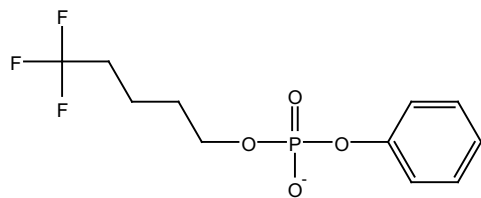

TBA / TEA - salt

**39**

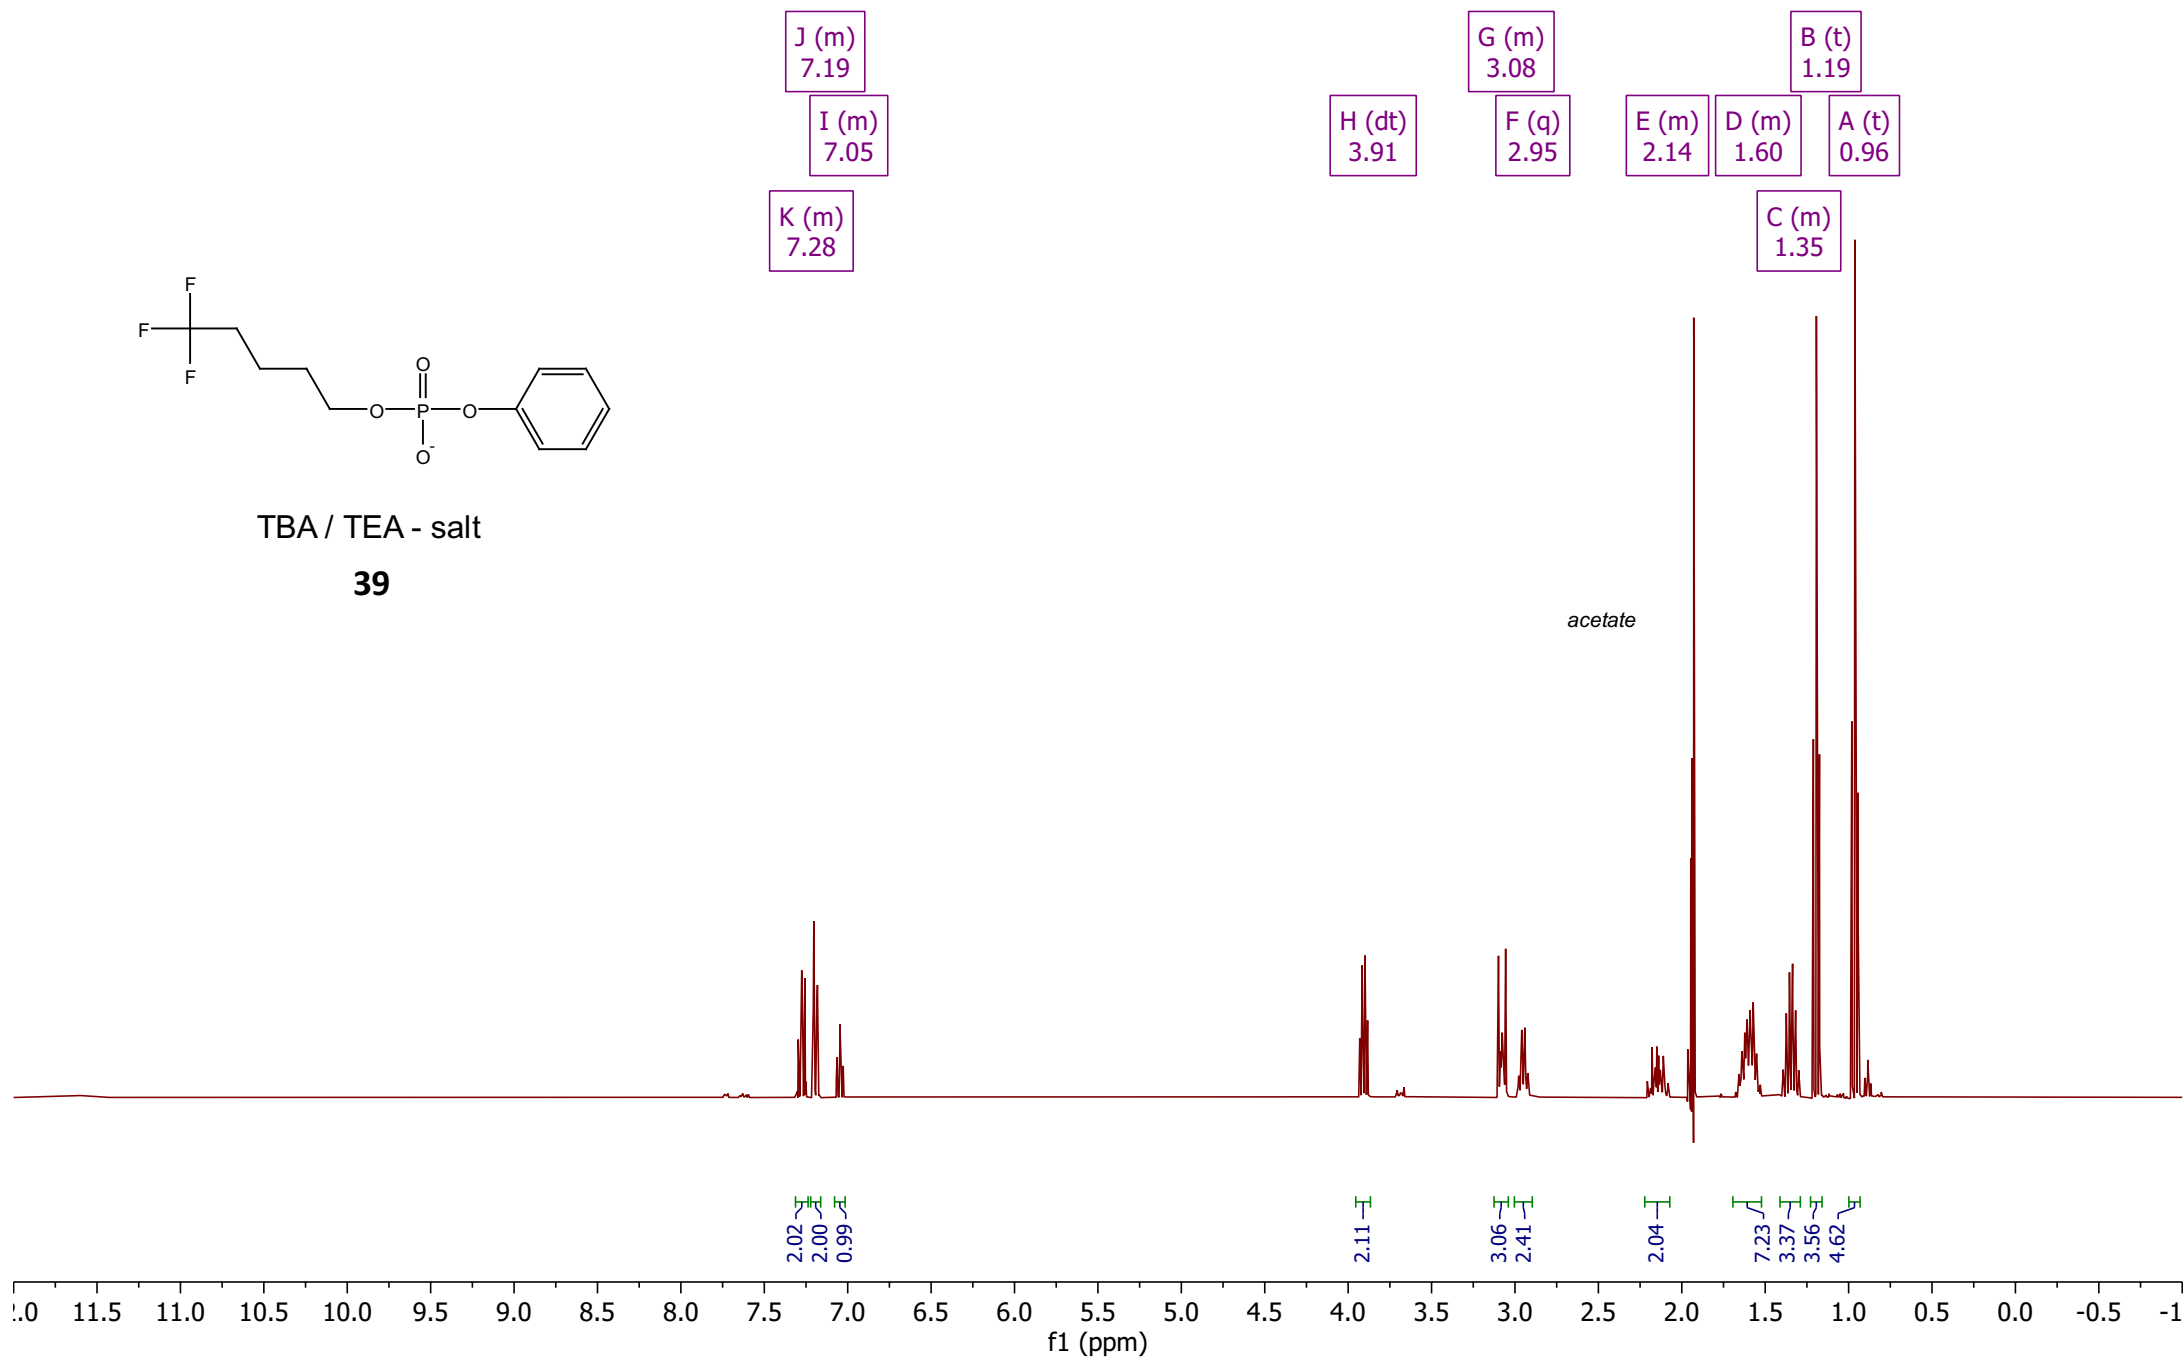



TBA / TEA - salt

**39**

A (t)  
-66.98

A (t)  
-66.98

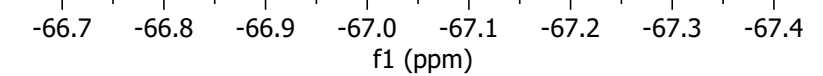



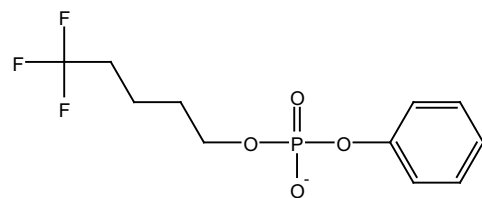

TBA / TEA - salt

**39**

A (s)  
-6.72

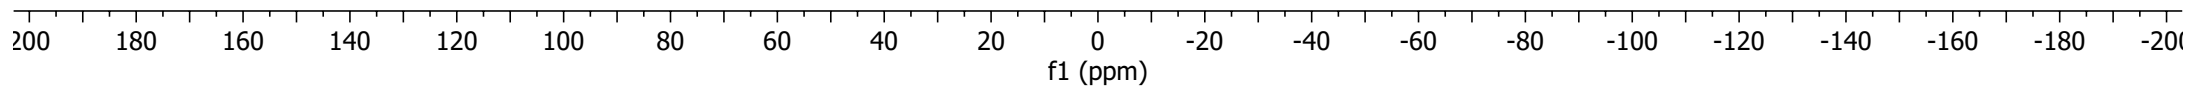

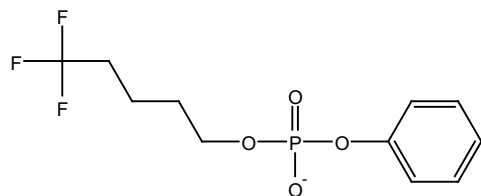

TBA / TEA - salt

**39**

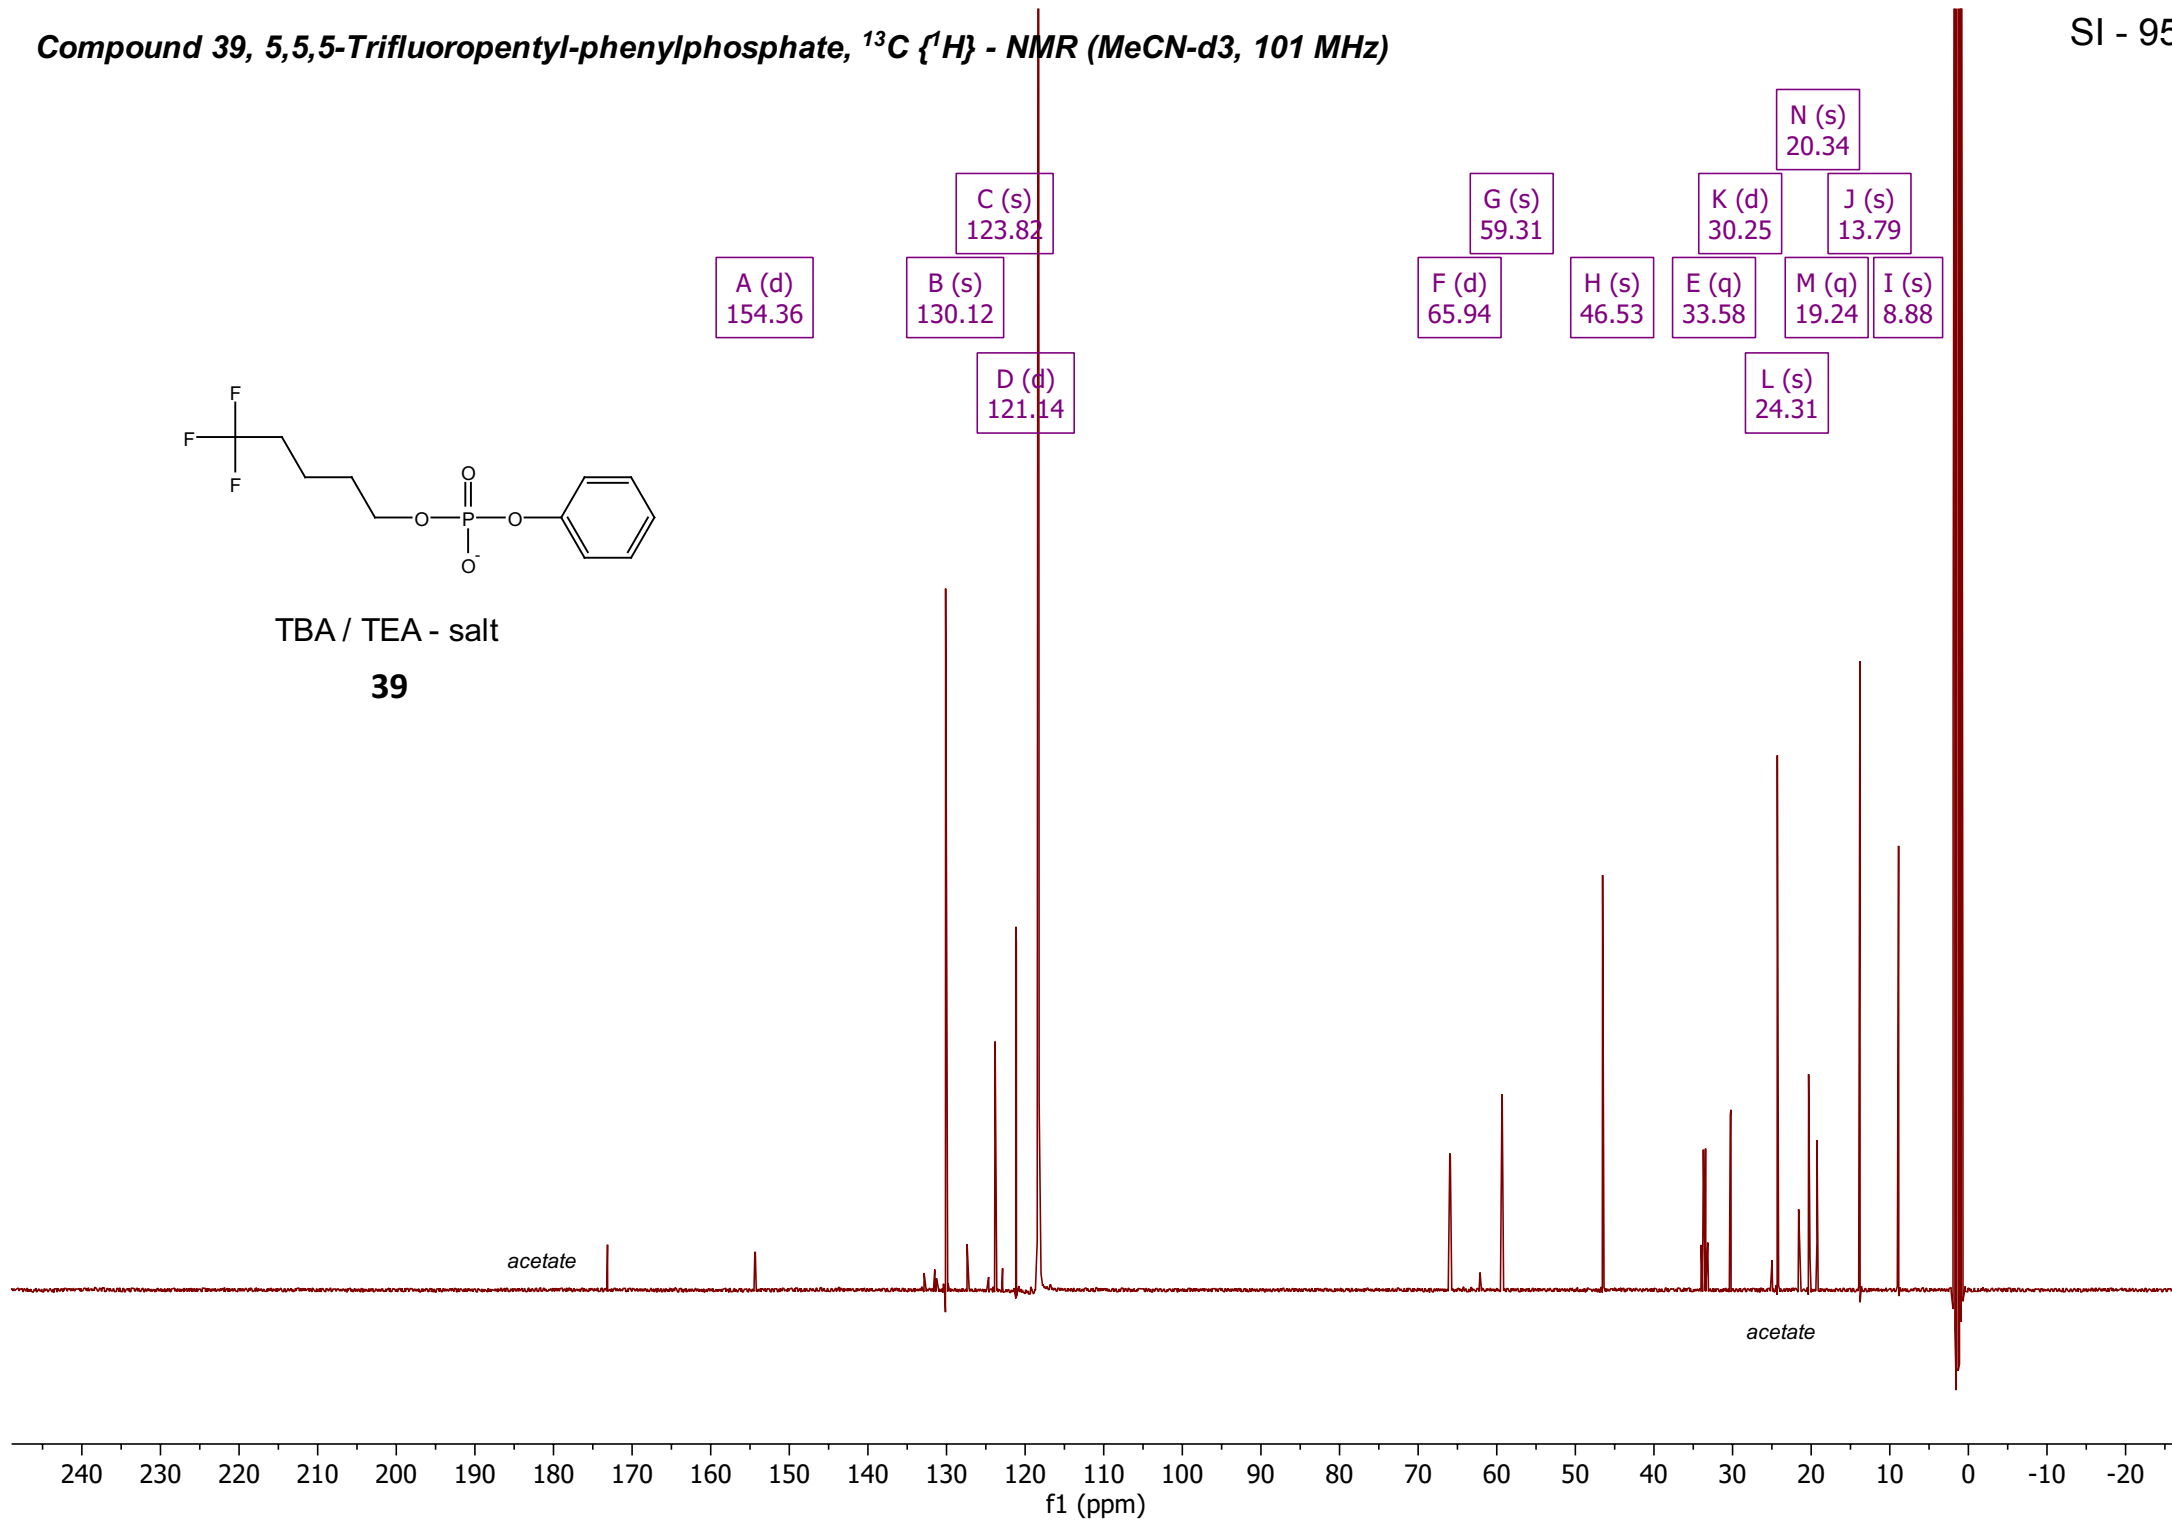

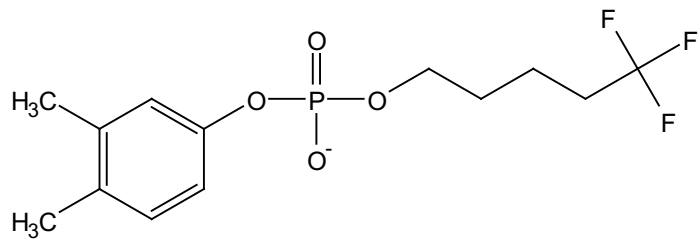

TBA salt

**41**

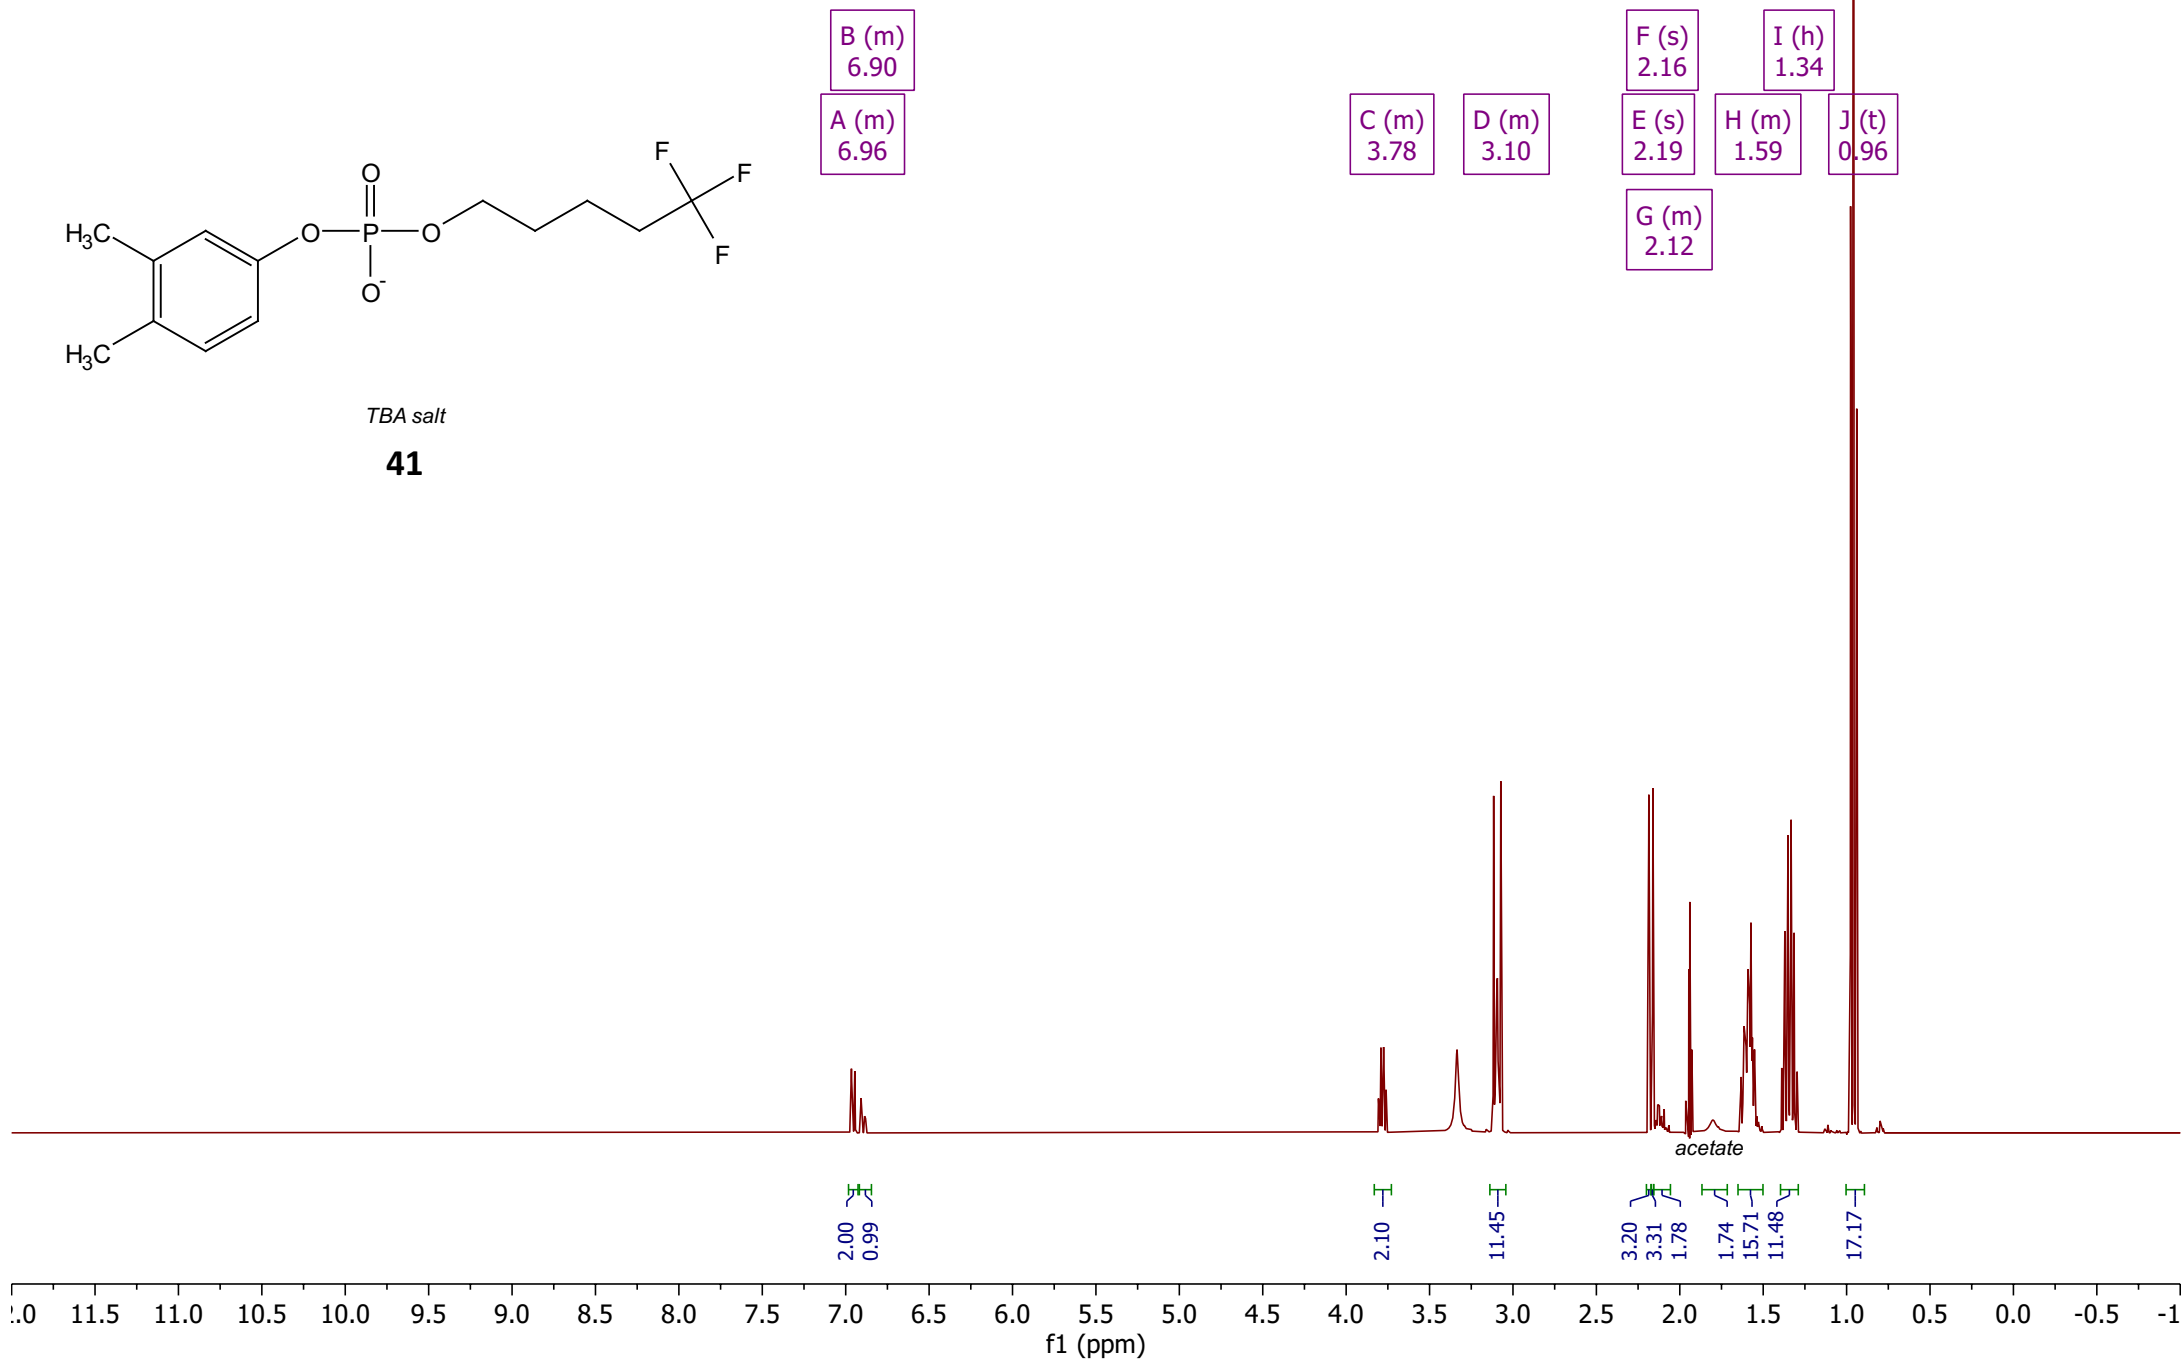

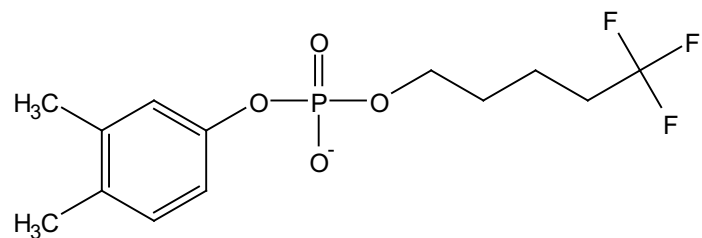

TBA salt  
**41**

A (t)  
-66.97

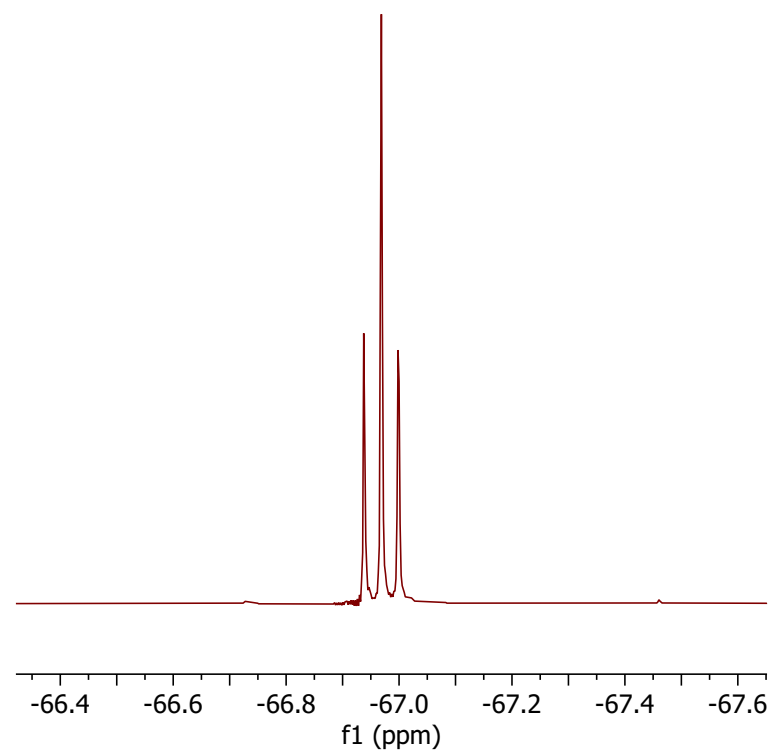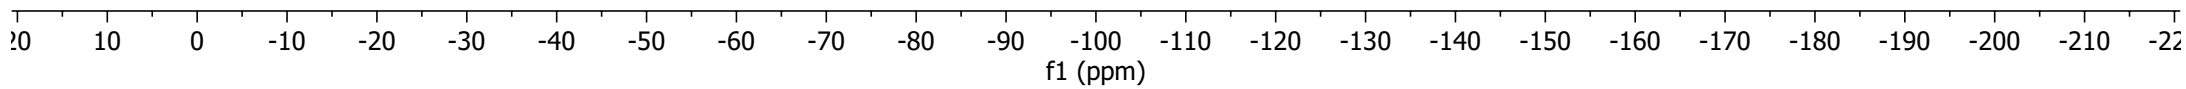

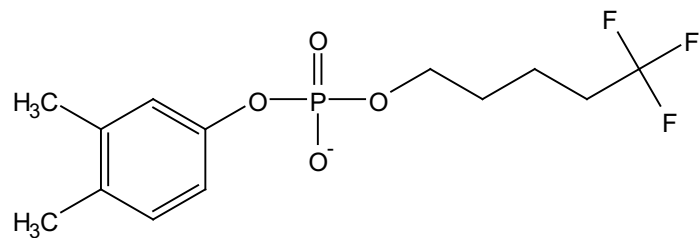

TBA salt

**41**

A (s)  
-5.40



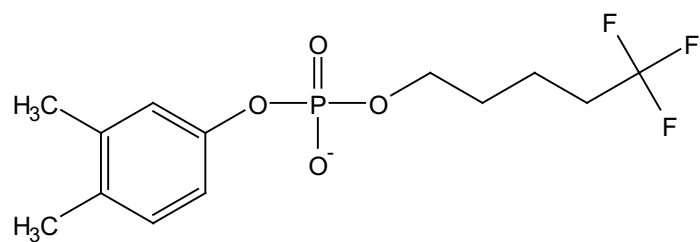

TBA salt

**41**

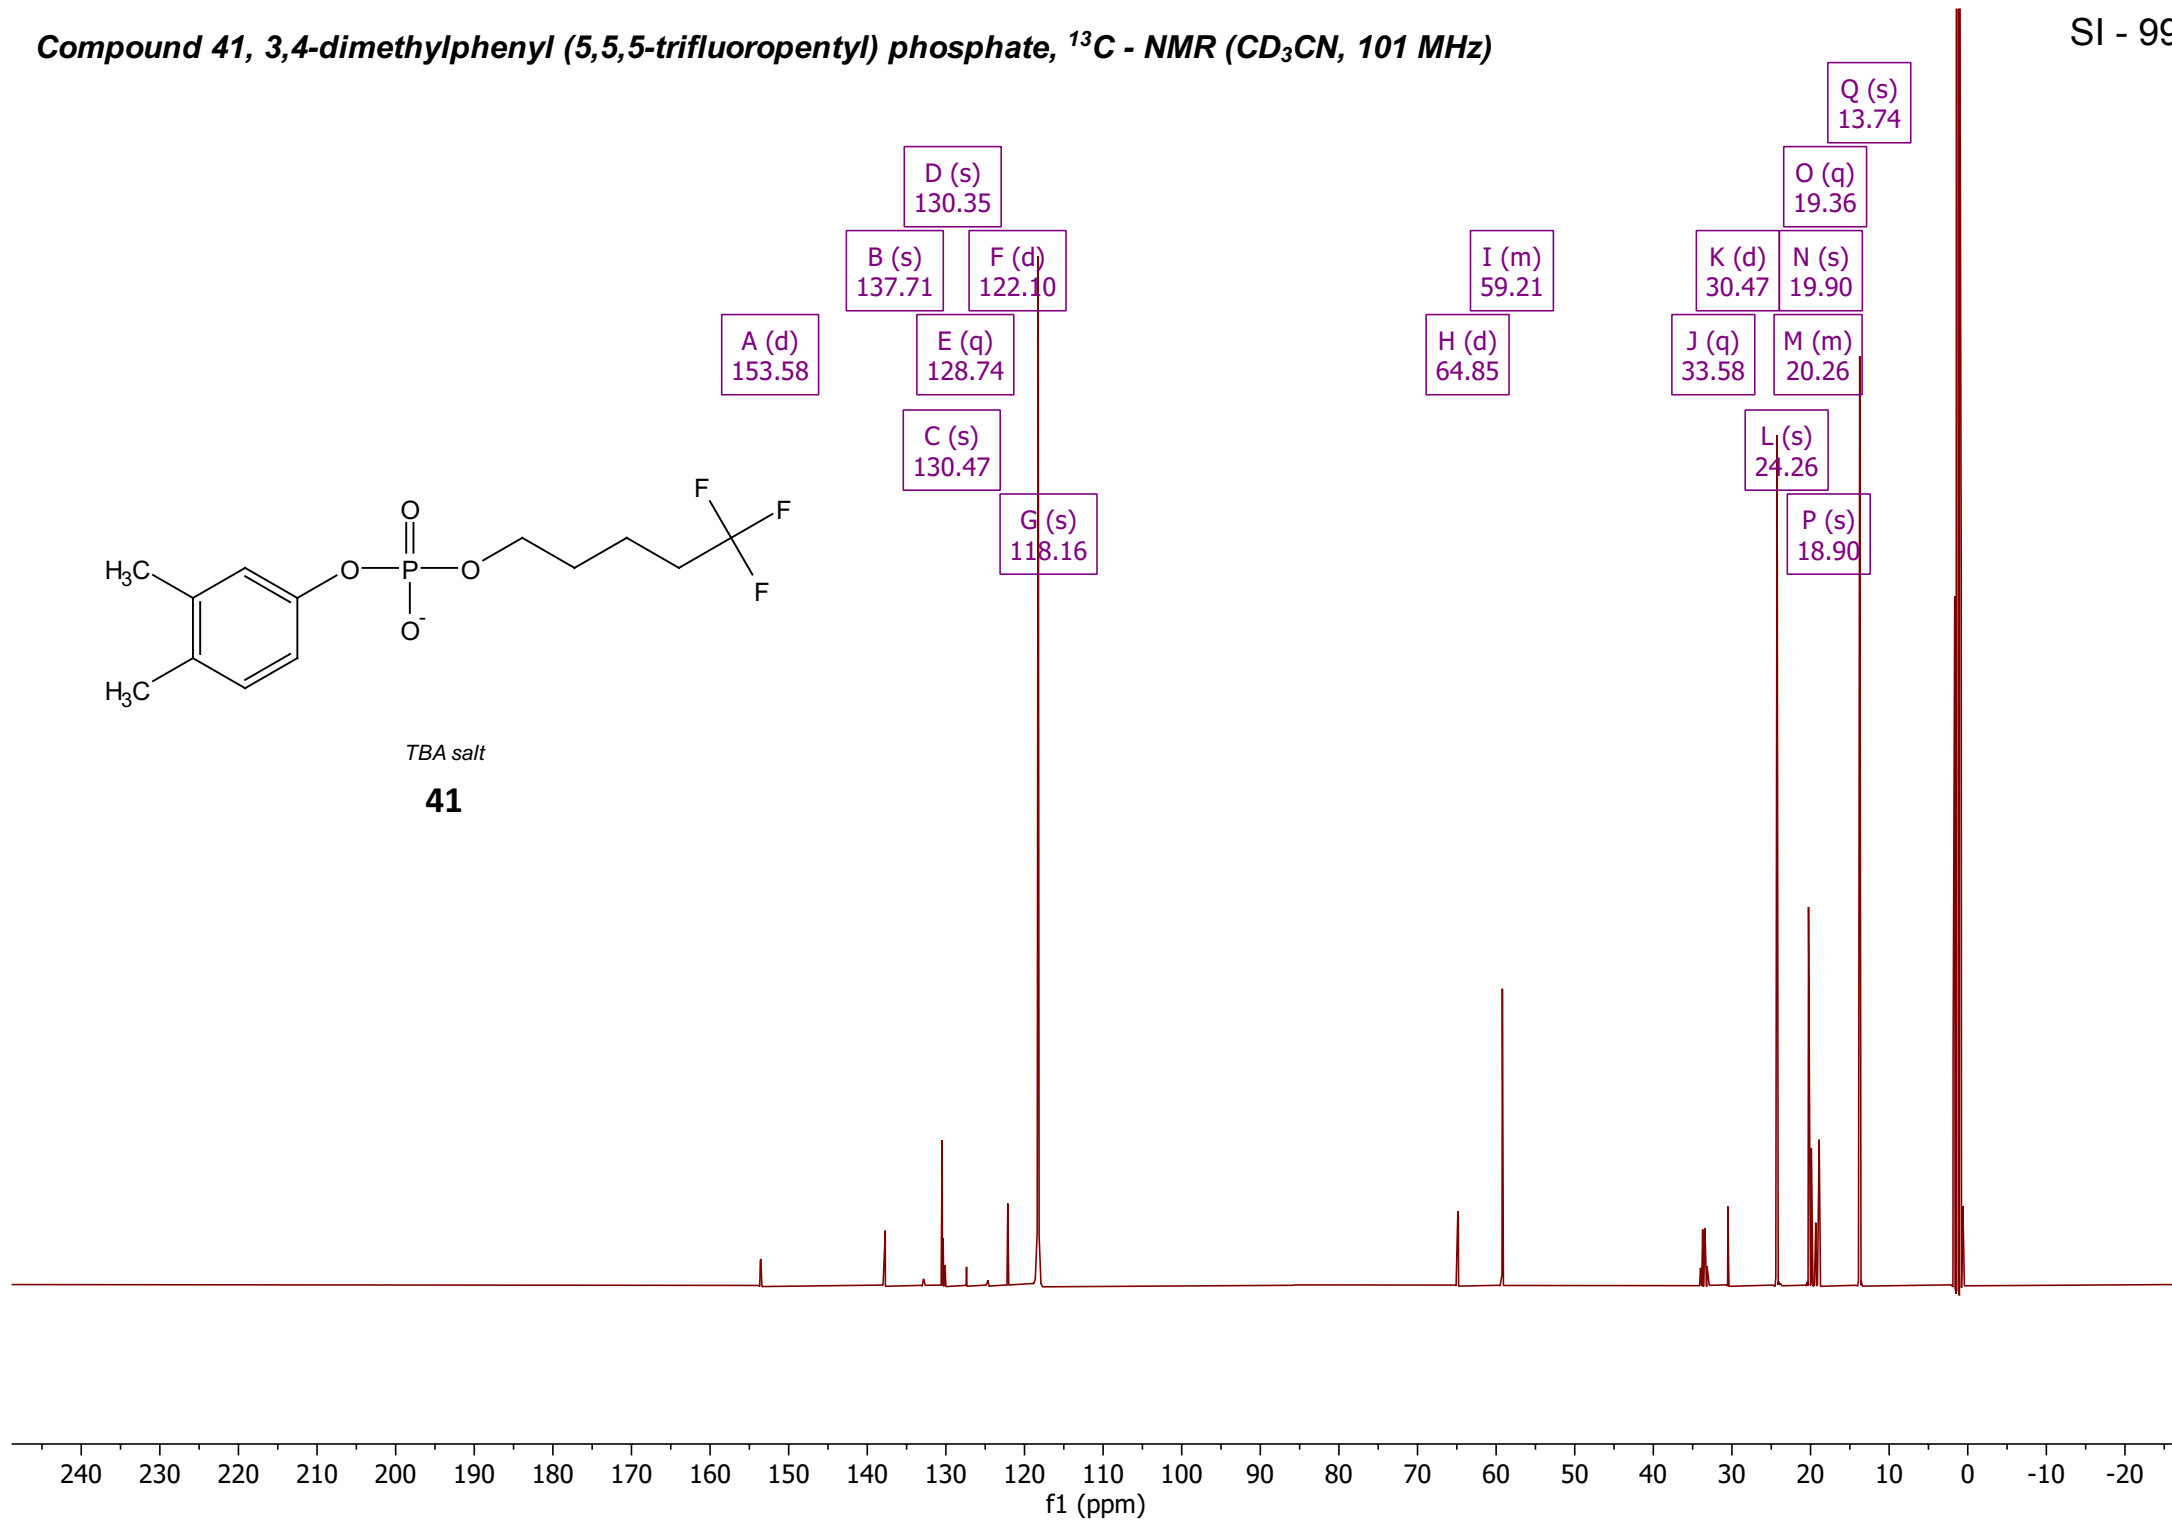

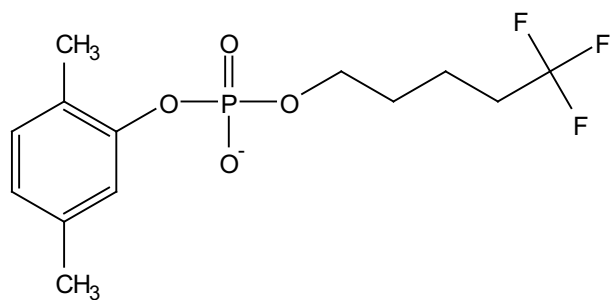

TBA salt

**42**

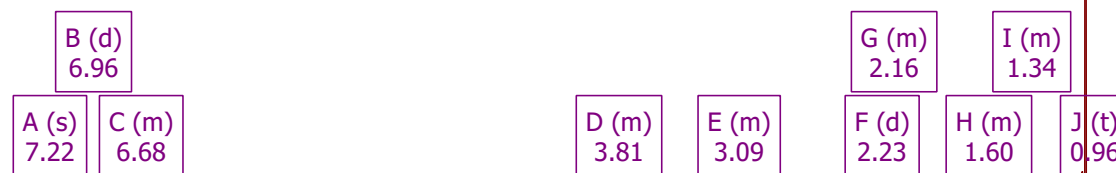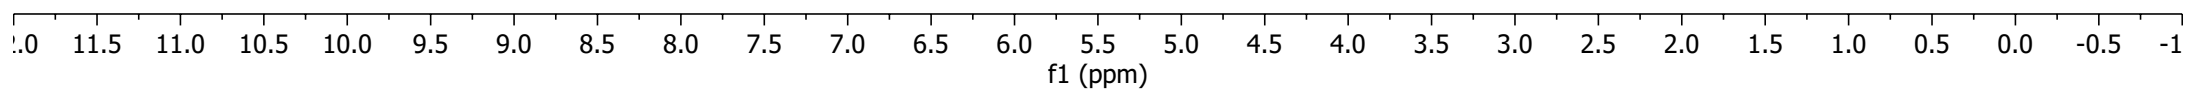

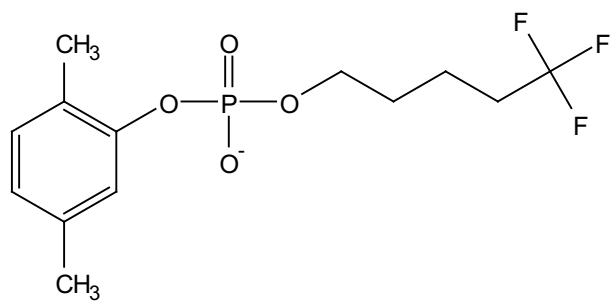

TBA salt

**42**

A (t)  
-66.95

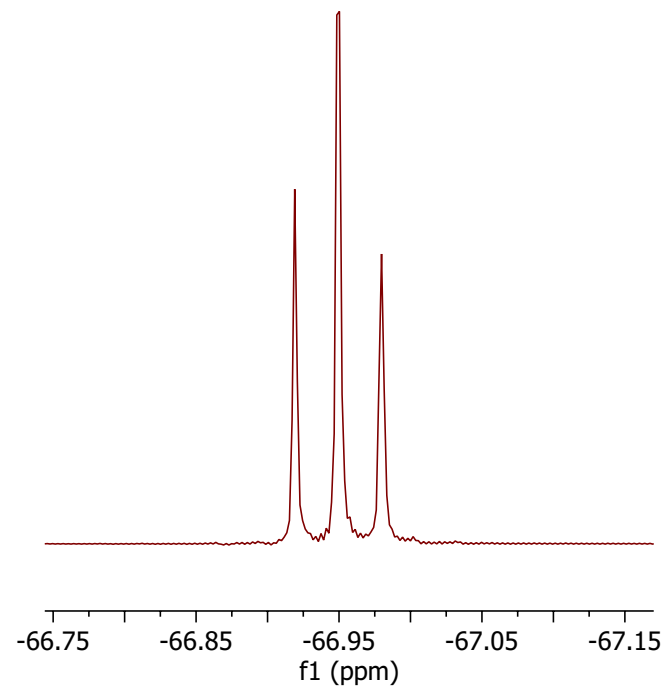





TBA salt

**42**

A (s)  
-5.26



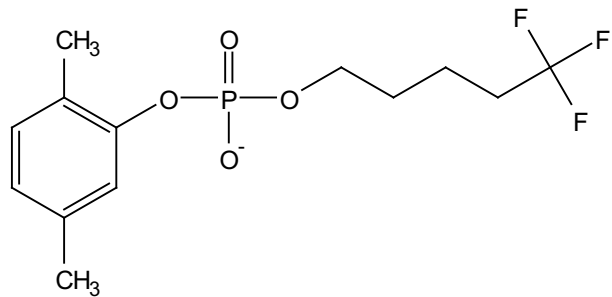

TBA salt

**42**

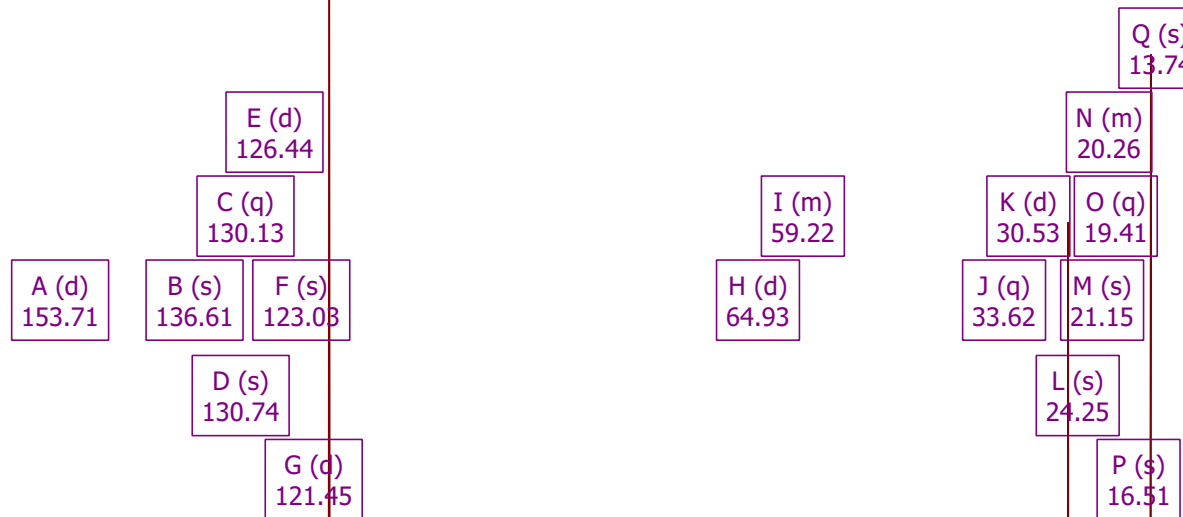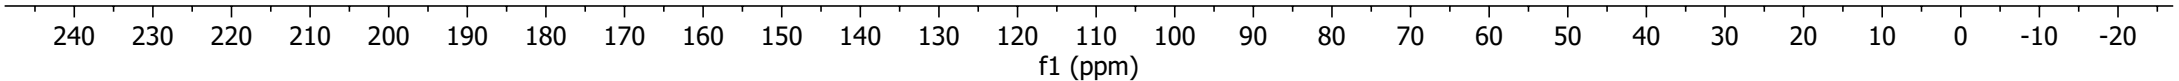

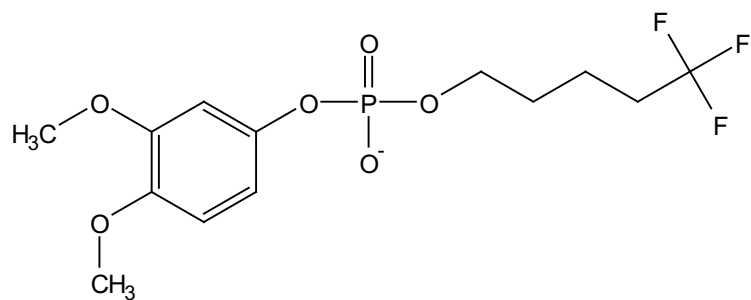

TBA/TEA salt

**43**

B (d)  
6.77

A (dd)  
6.87

C (ddd)  
6.70

E (s)  
3.75

D (m)  
3.80

F (s)  
3.73

G (m)  
3.09

H (m)  
2.14

I (m)  
1.59

J (m)  
1.35

K (t)  
0.89

L (t)  
0.96

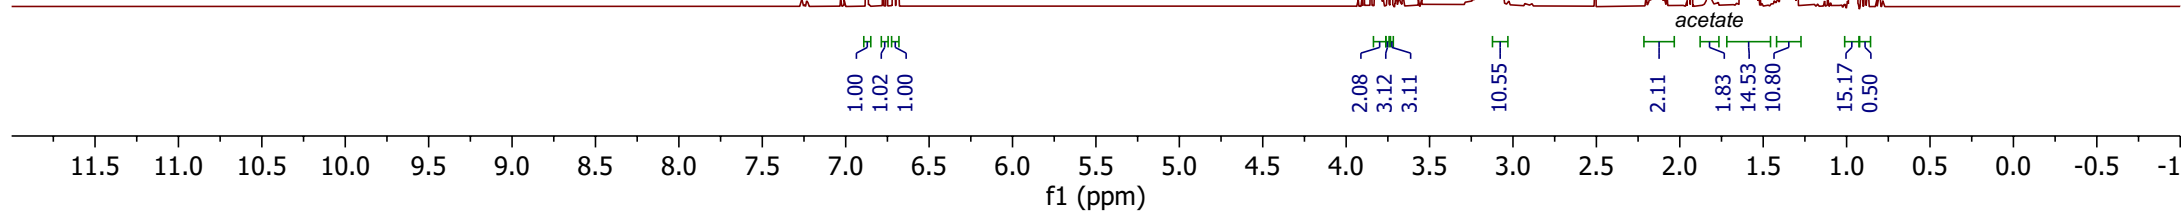

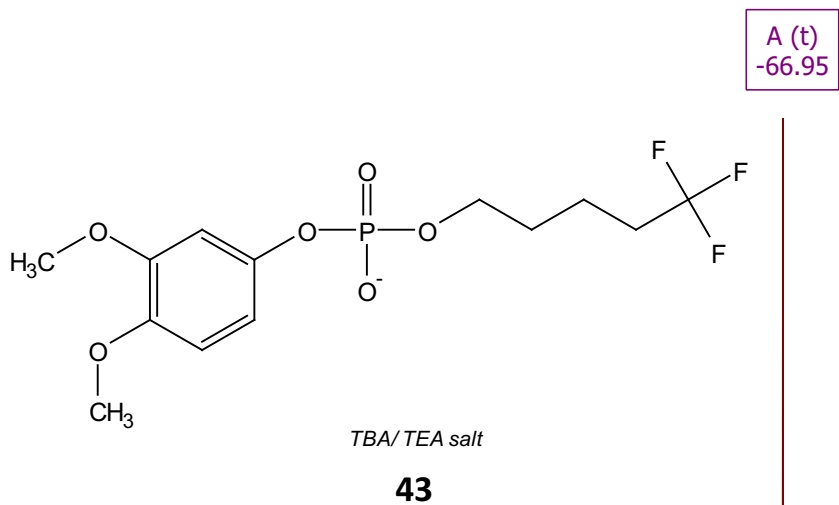

A (t)  
-66.95

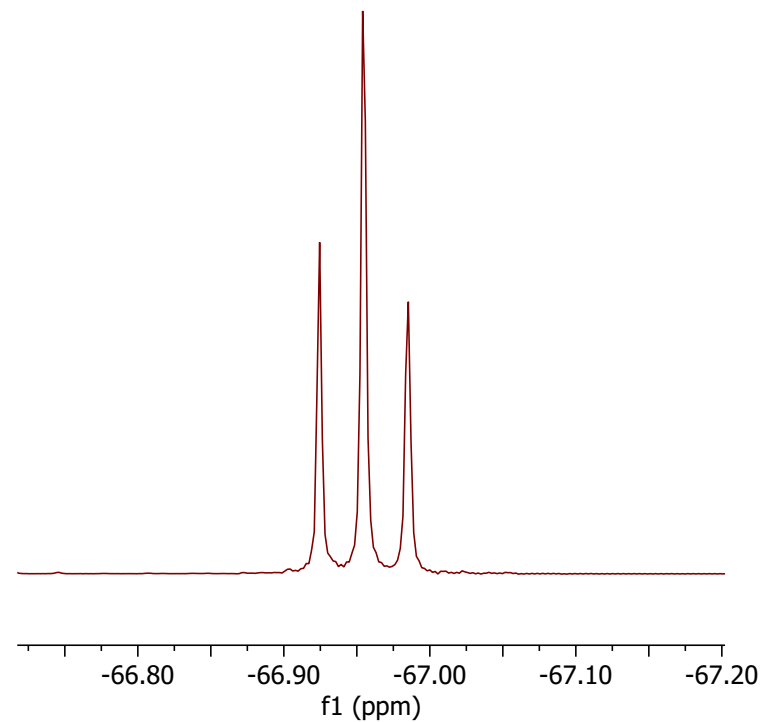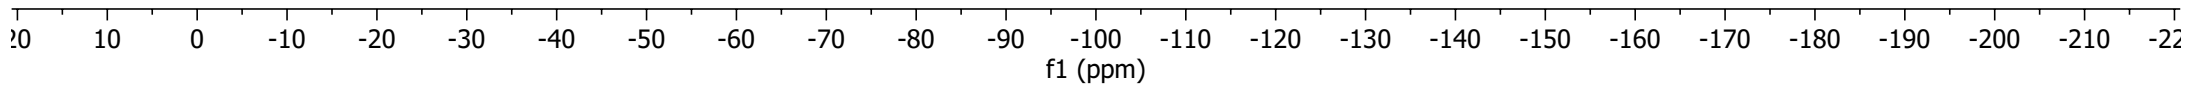

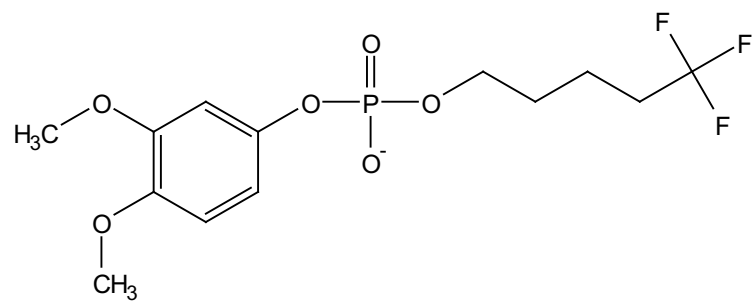

TBA/TEA salt

**43**

A (s)  
-5.36

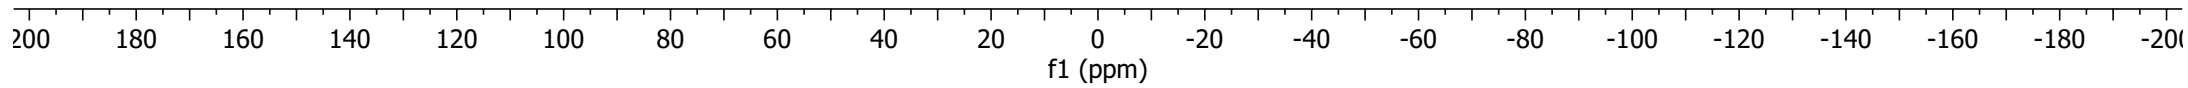

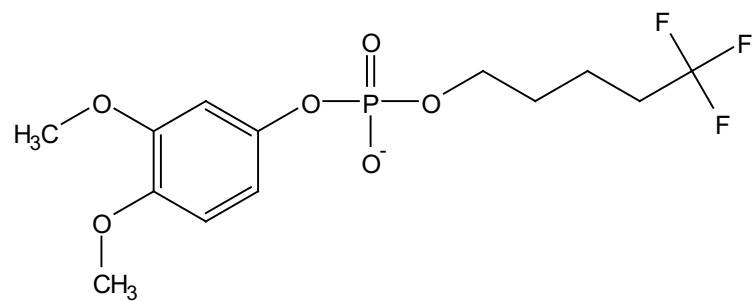

TBA/TEA salt

**43**

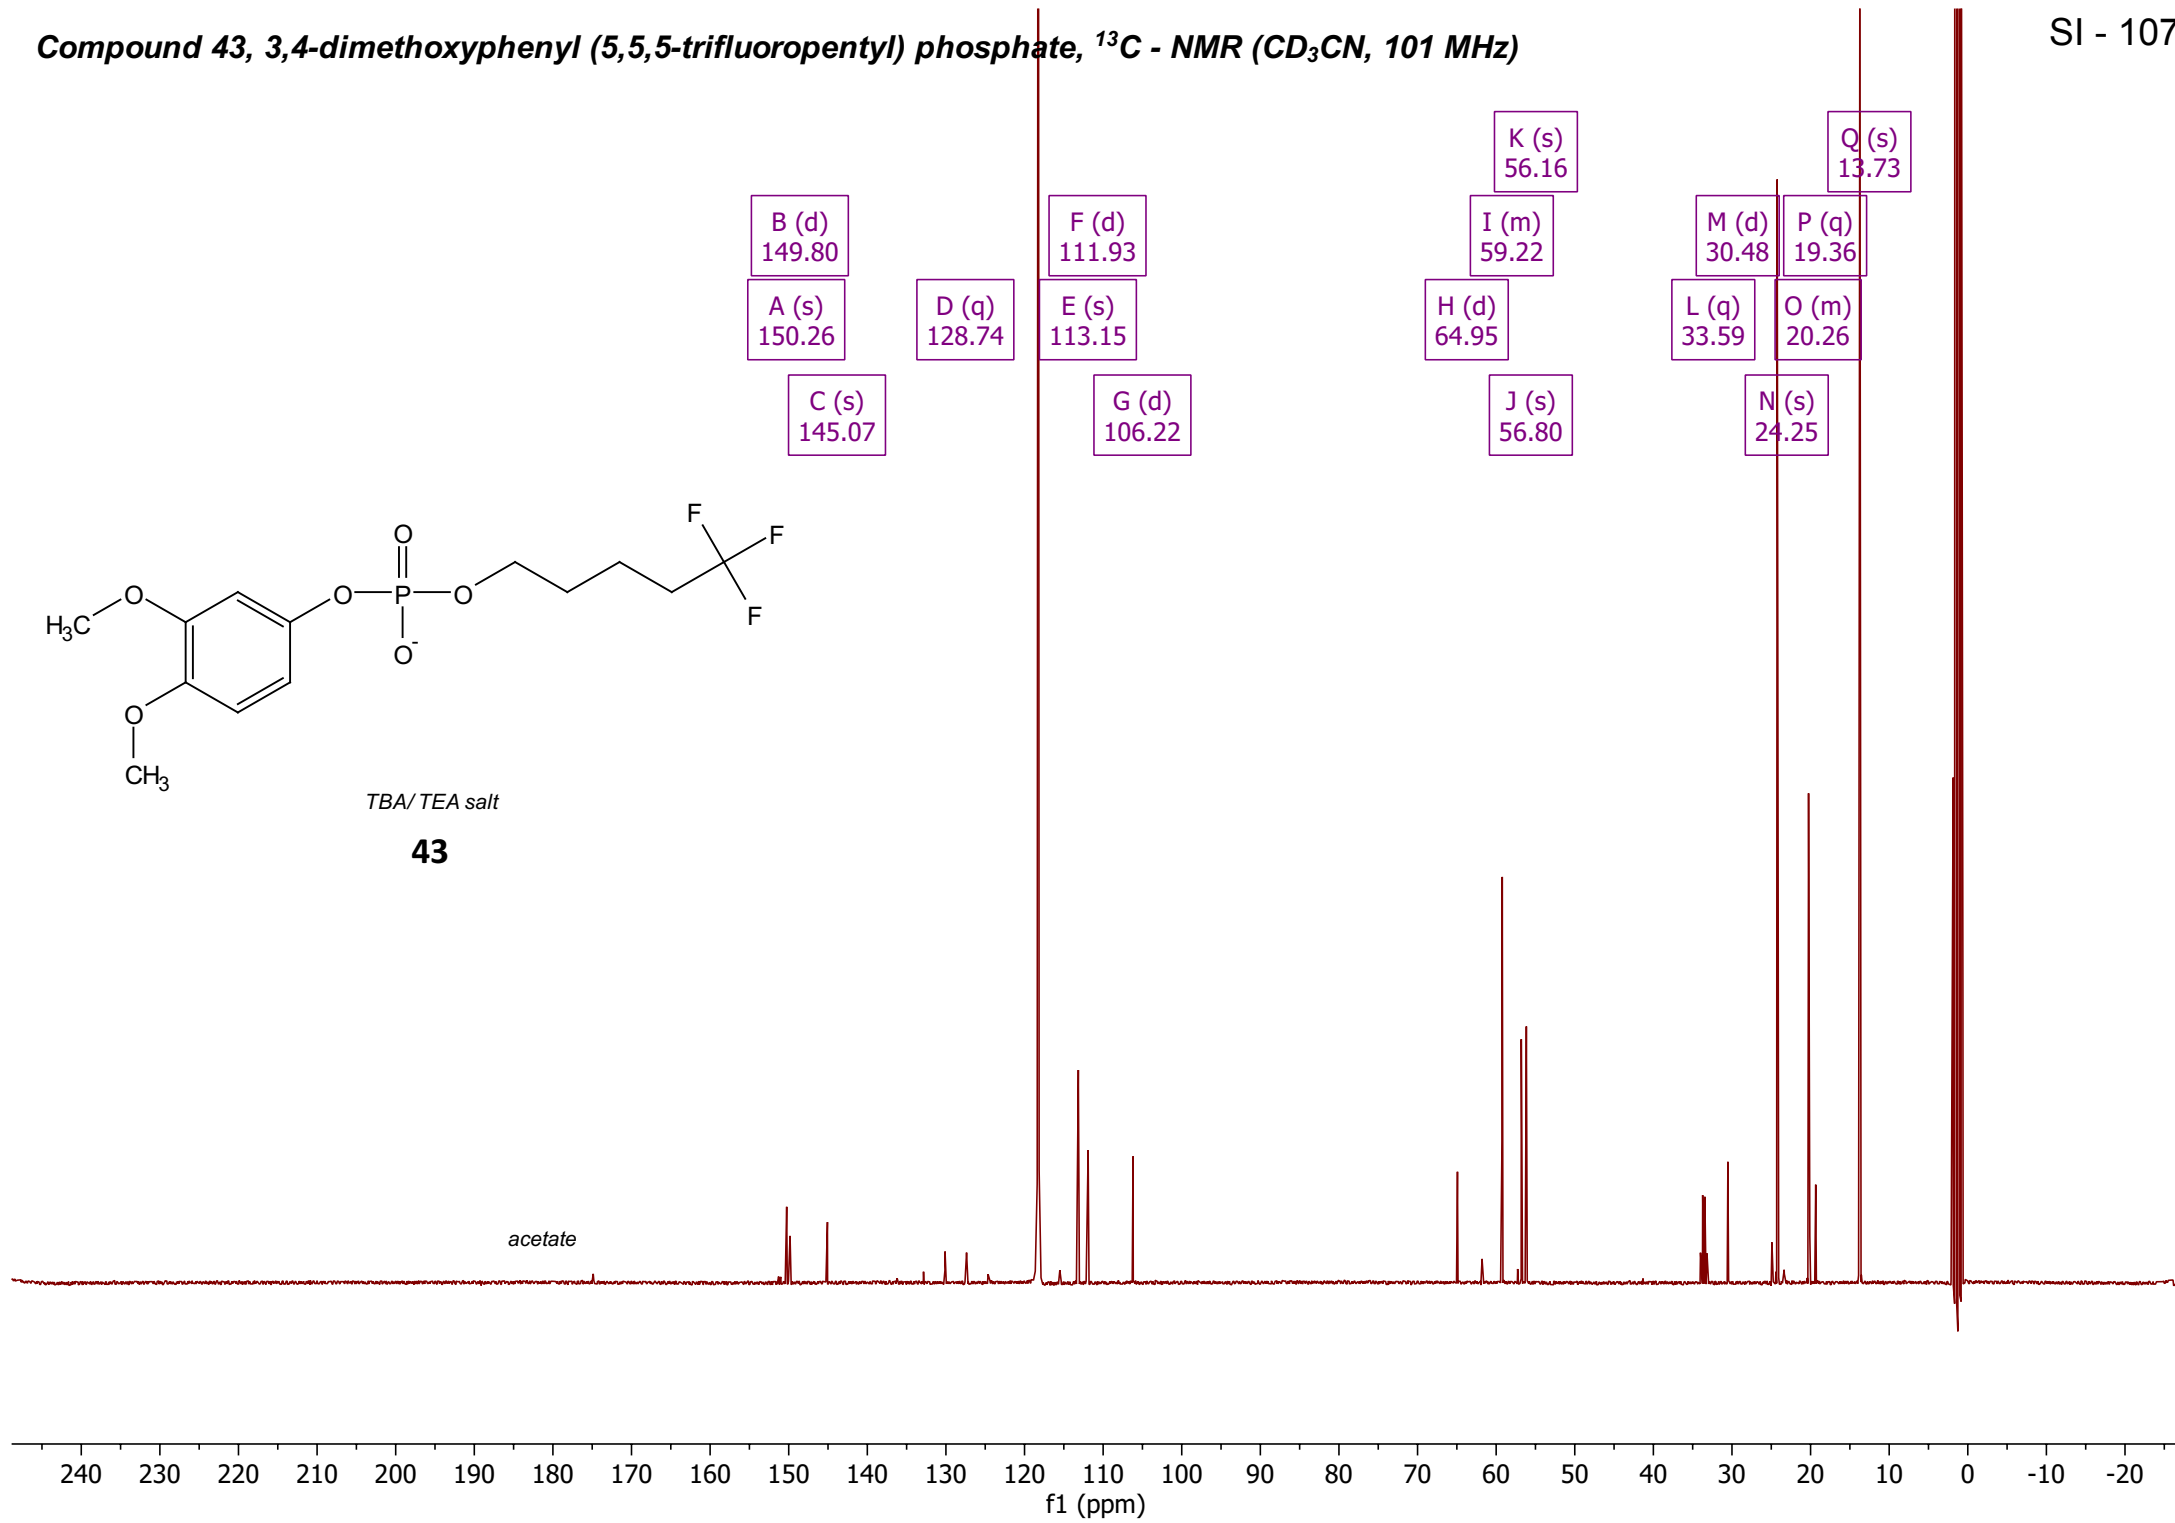

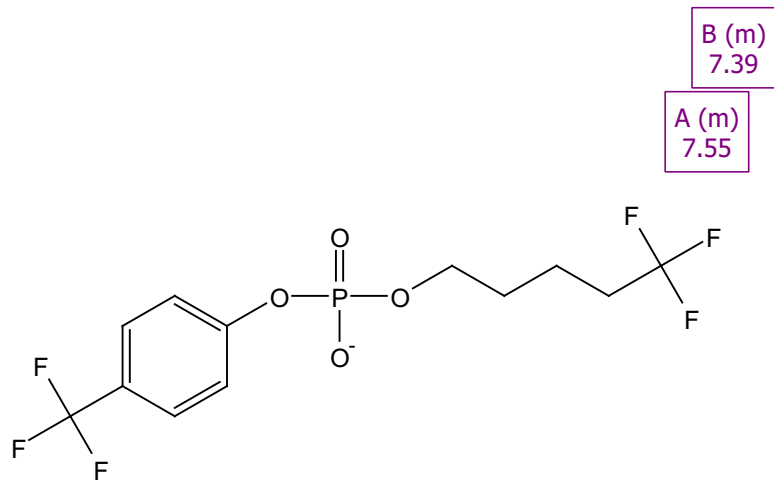

TBA salt

**44**

A (m) 7.55  
B (m) 7.39  
C (m) 3.84  
D (m) 3.09  
E (m) 2.12  
F (m) 1.59  
G (m) 1.35  
H (t) 0.96

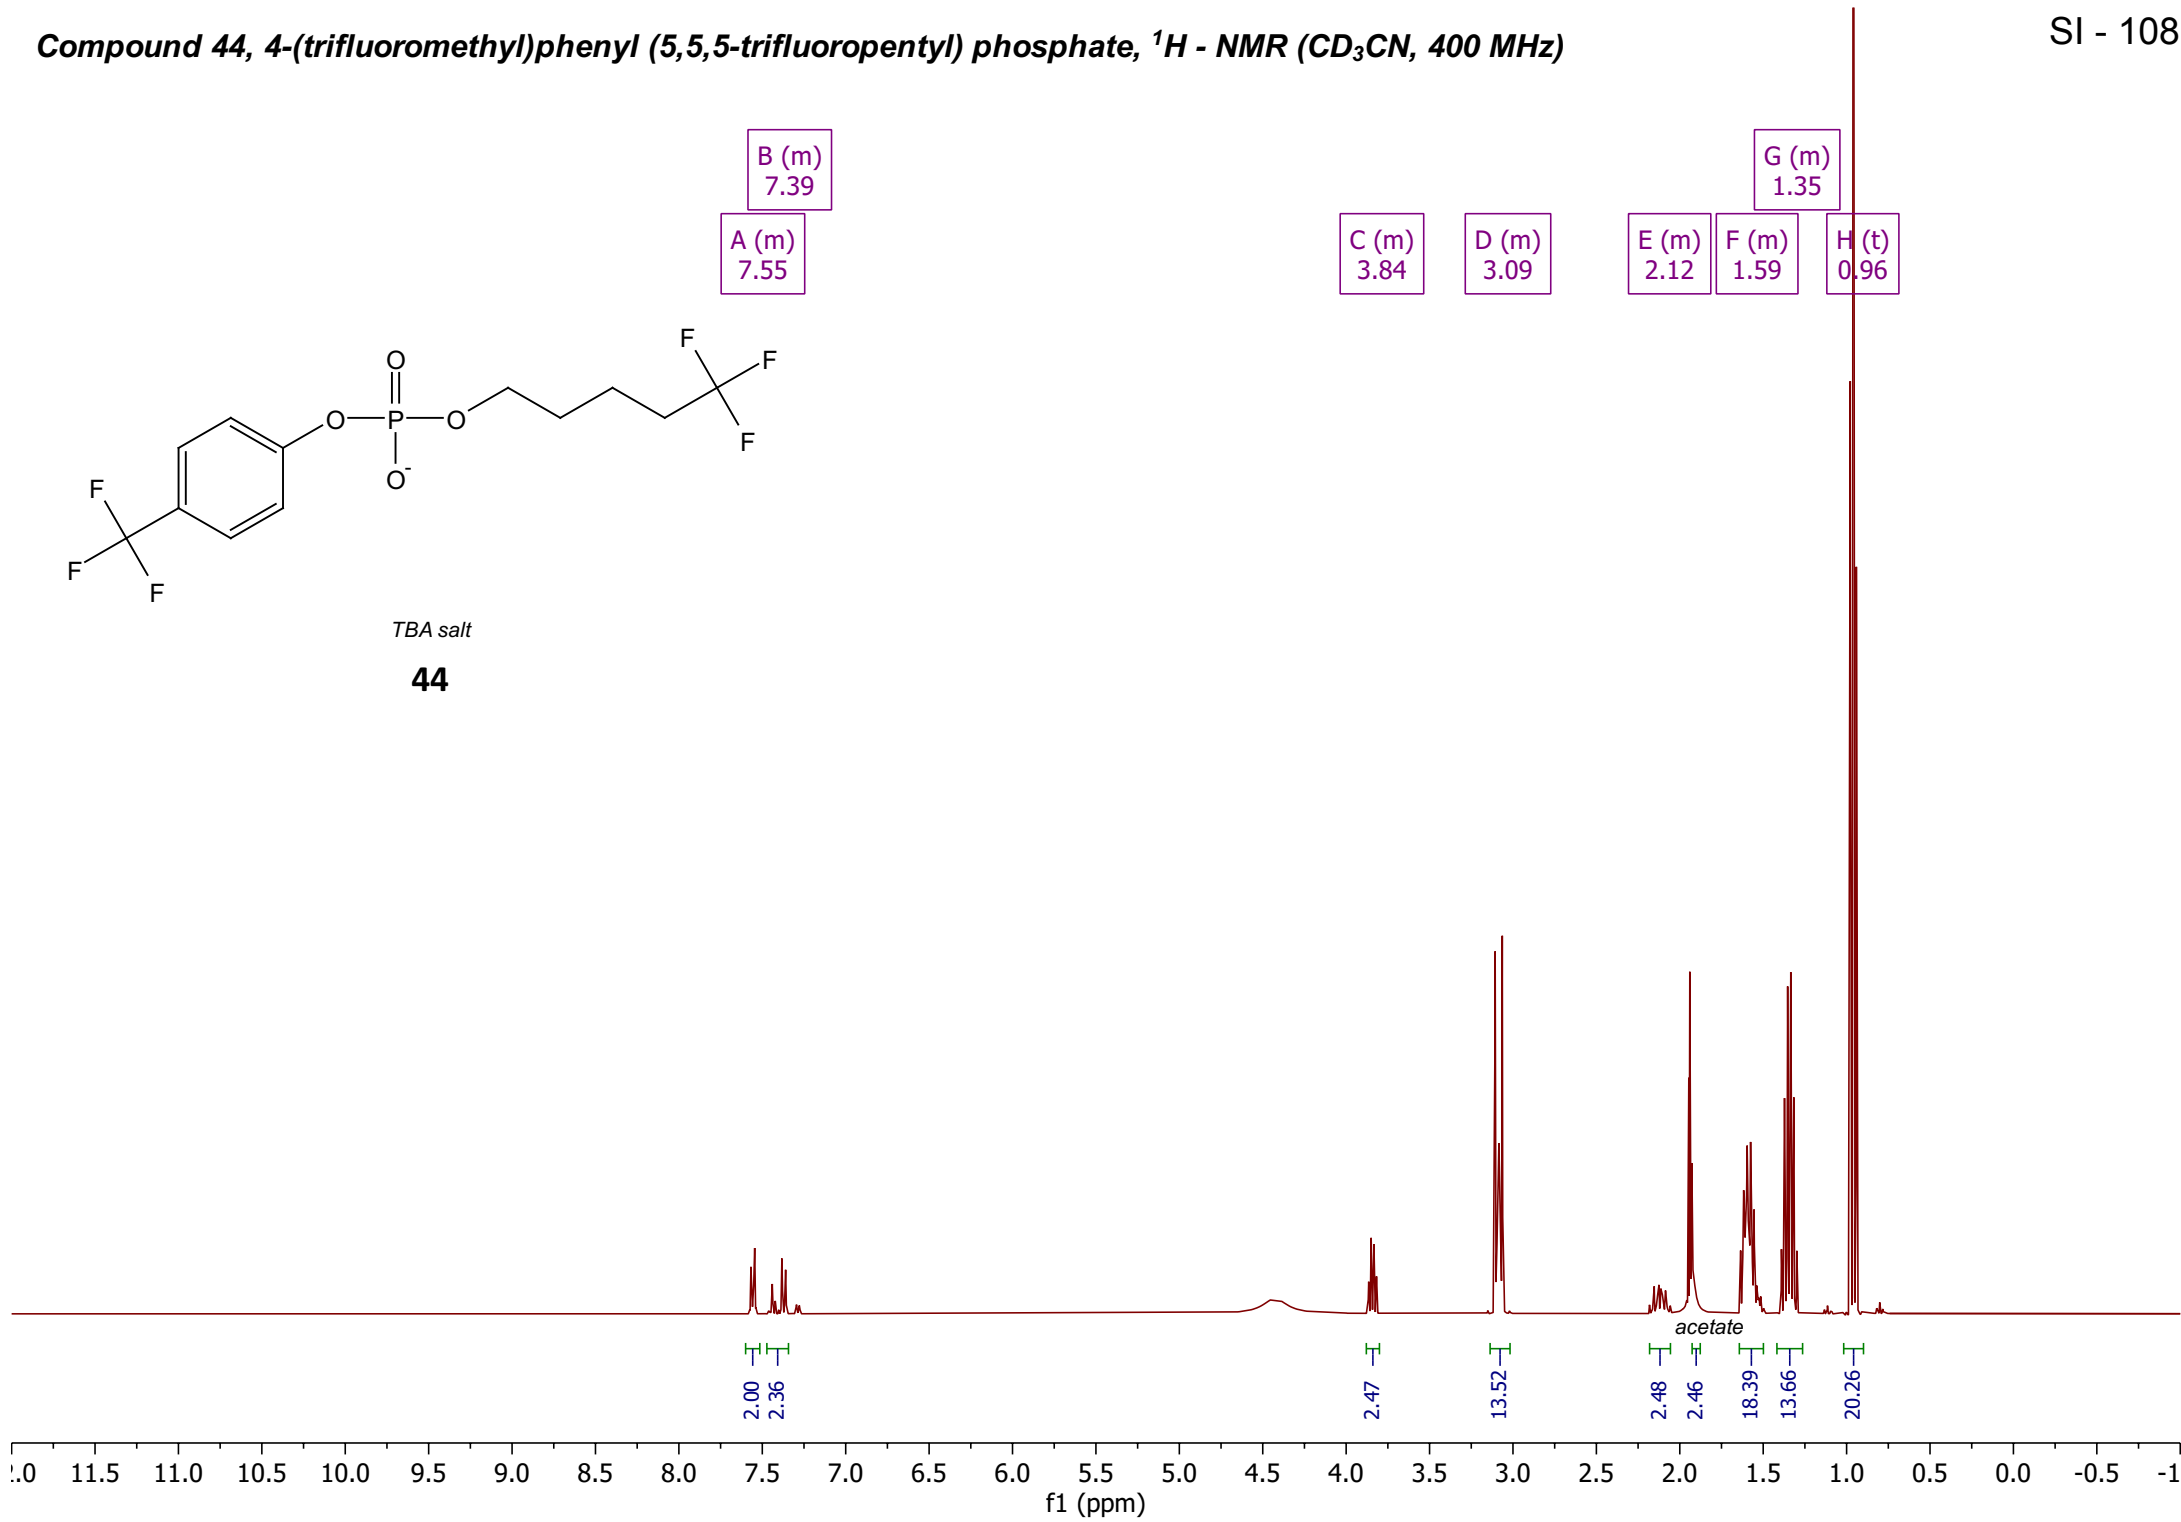

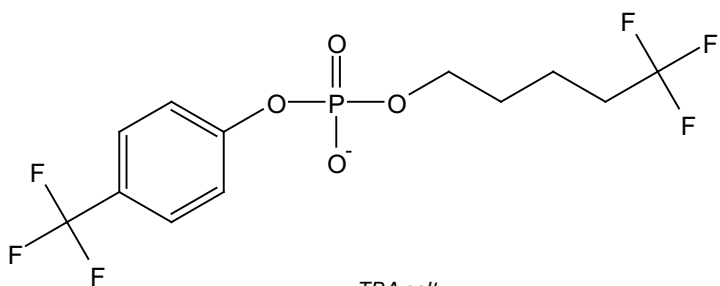

TBA salt  
**44**

C (m)  
-67.03

A (s)  
-61.94

B (s)  
-62.98

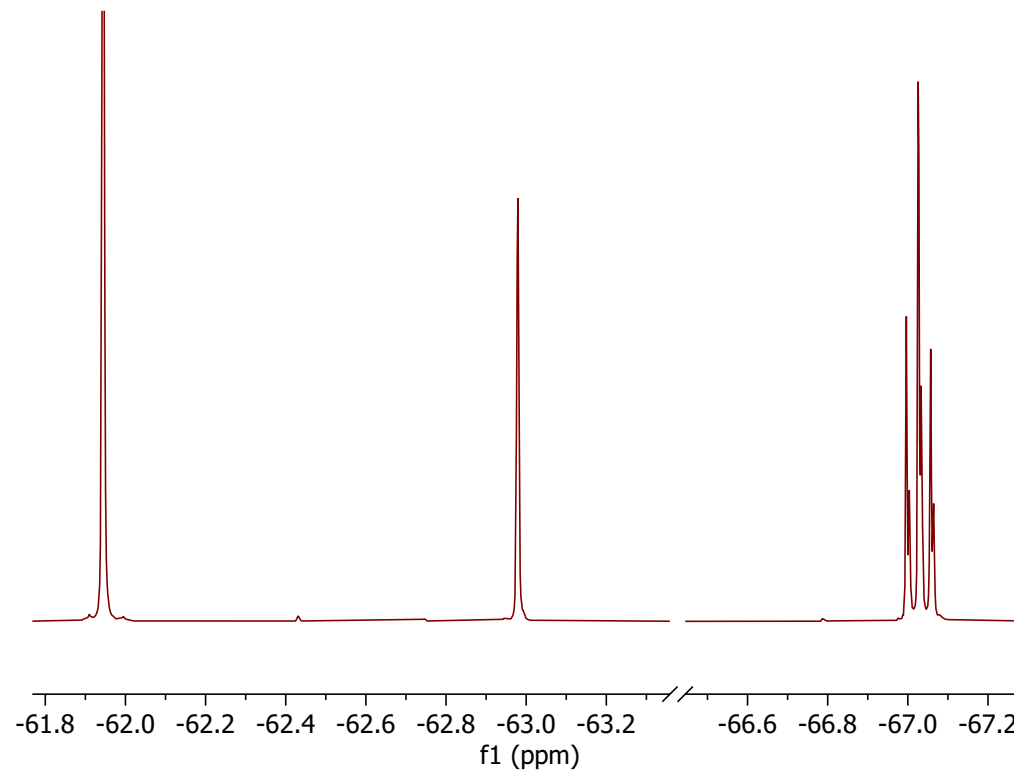



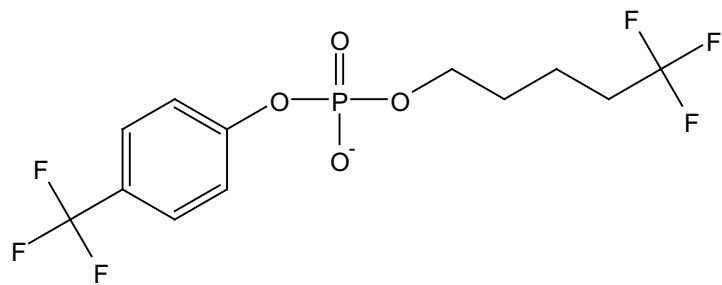

TBA salt

**44**

A (s)  
-1.32



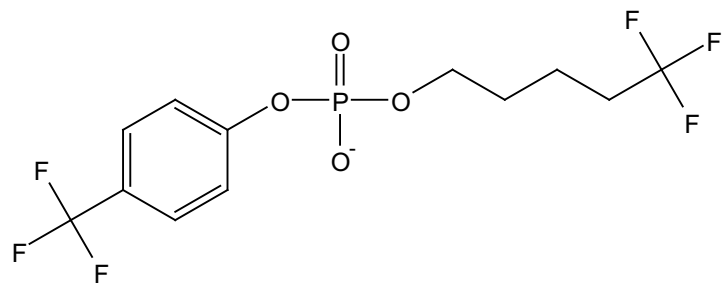

TBA salt

**44**

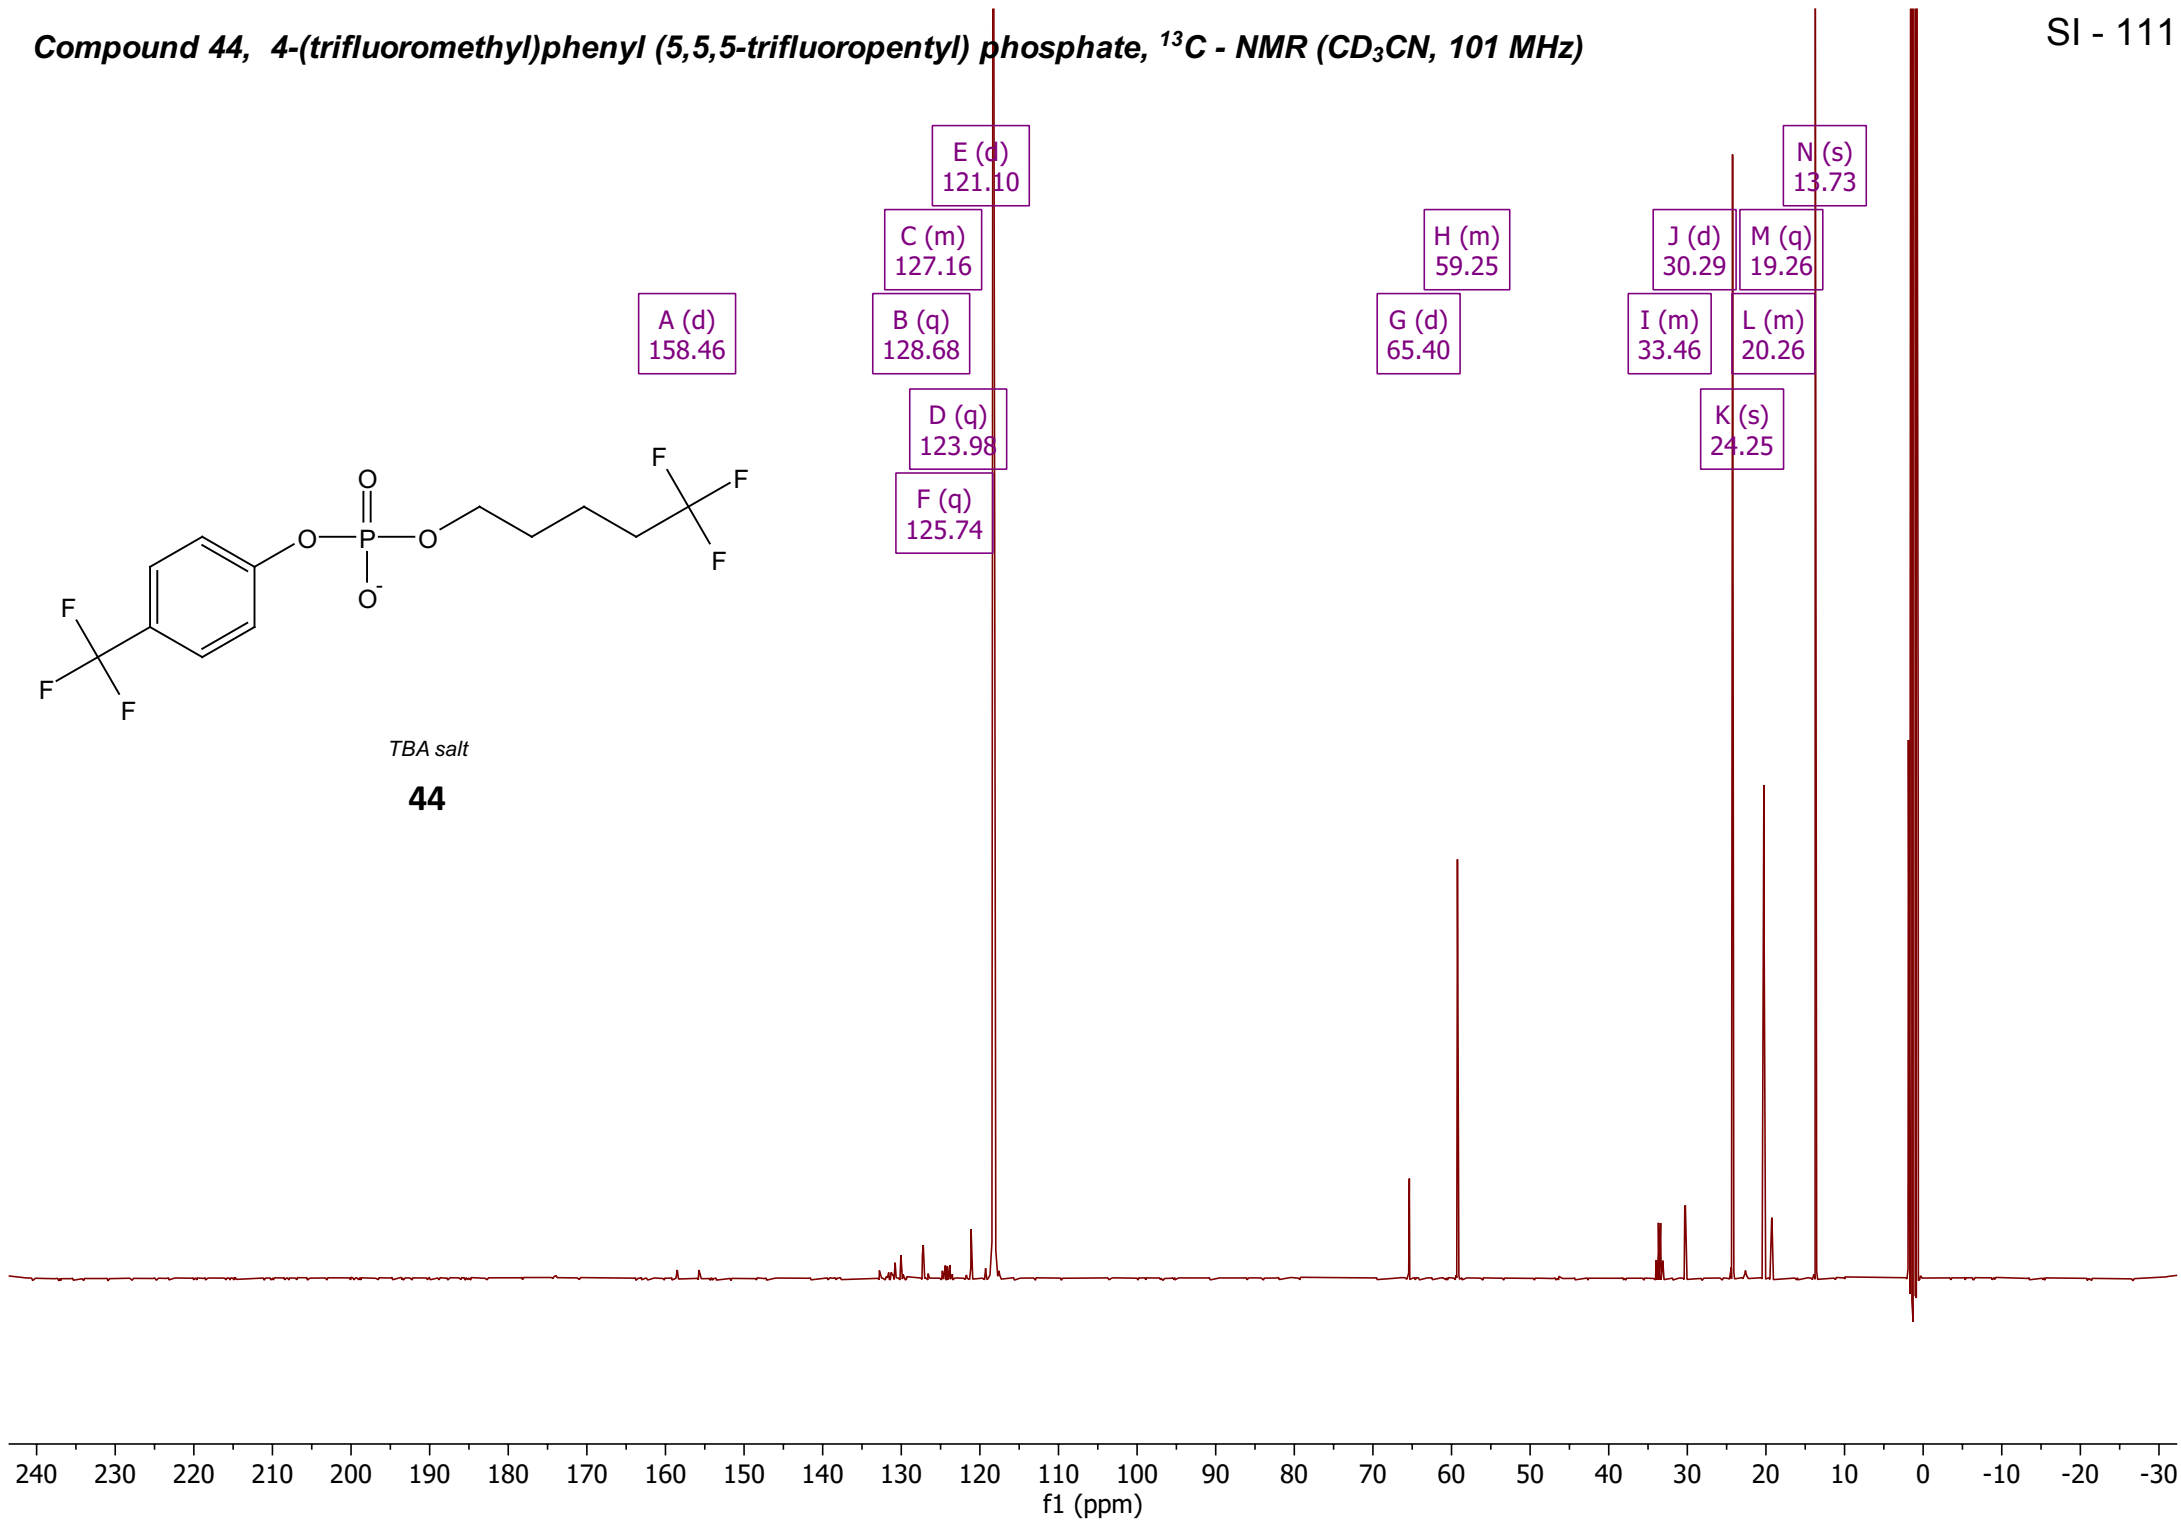

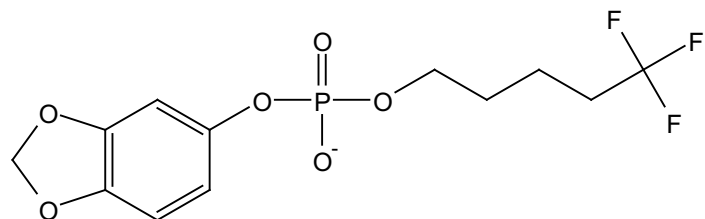

TBA salt

**45**

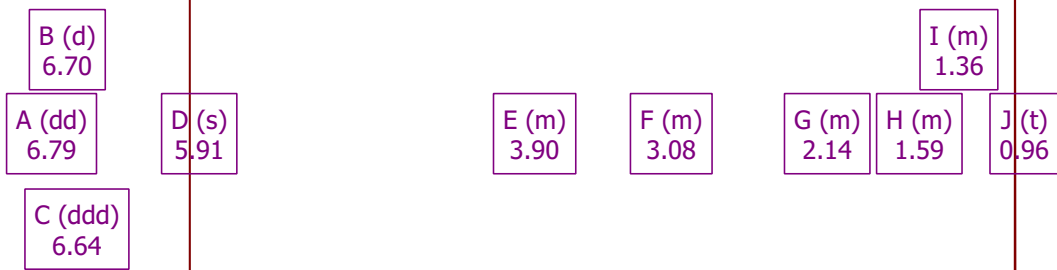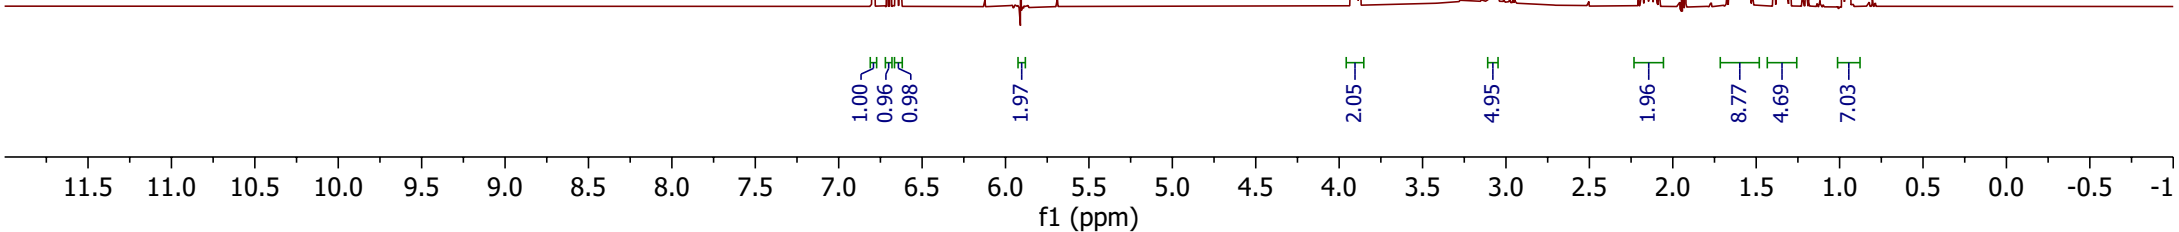

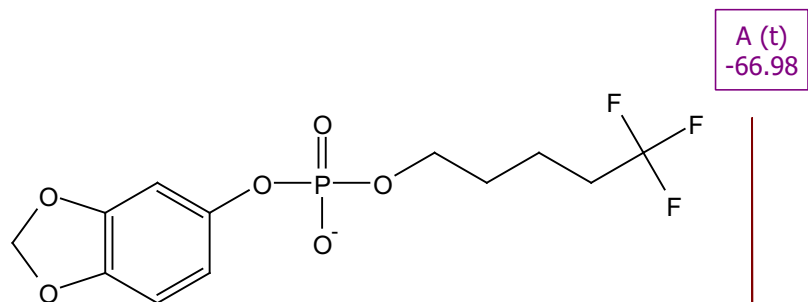

TBA salt  
**45**

A (t)  
-66.98

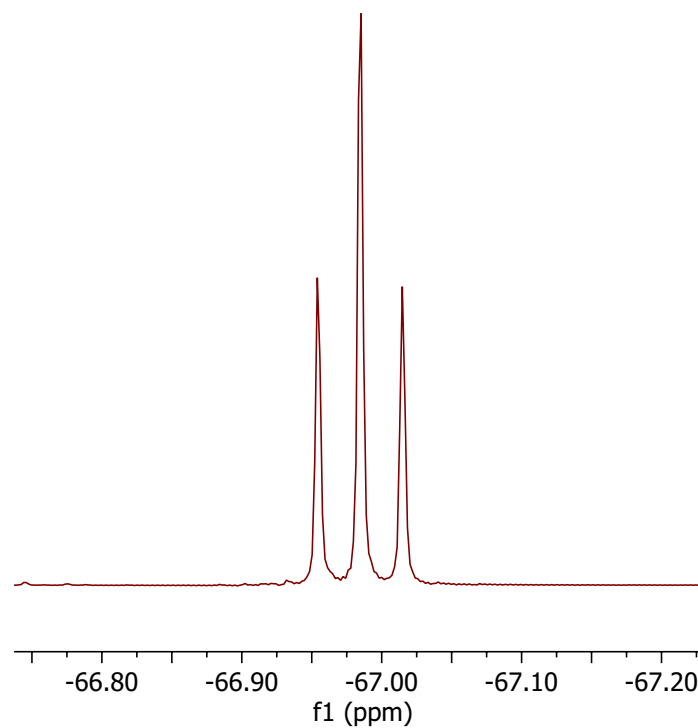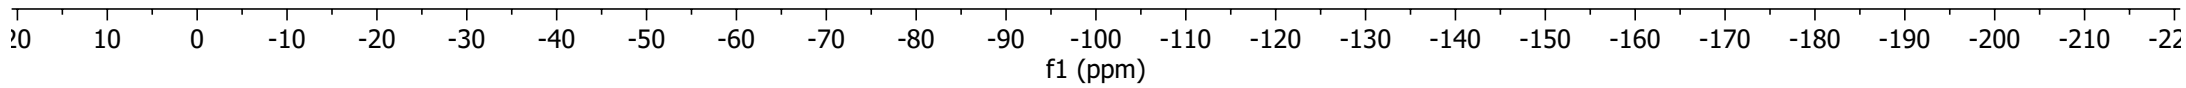



TBA salt

**45**

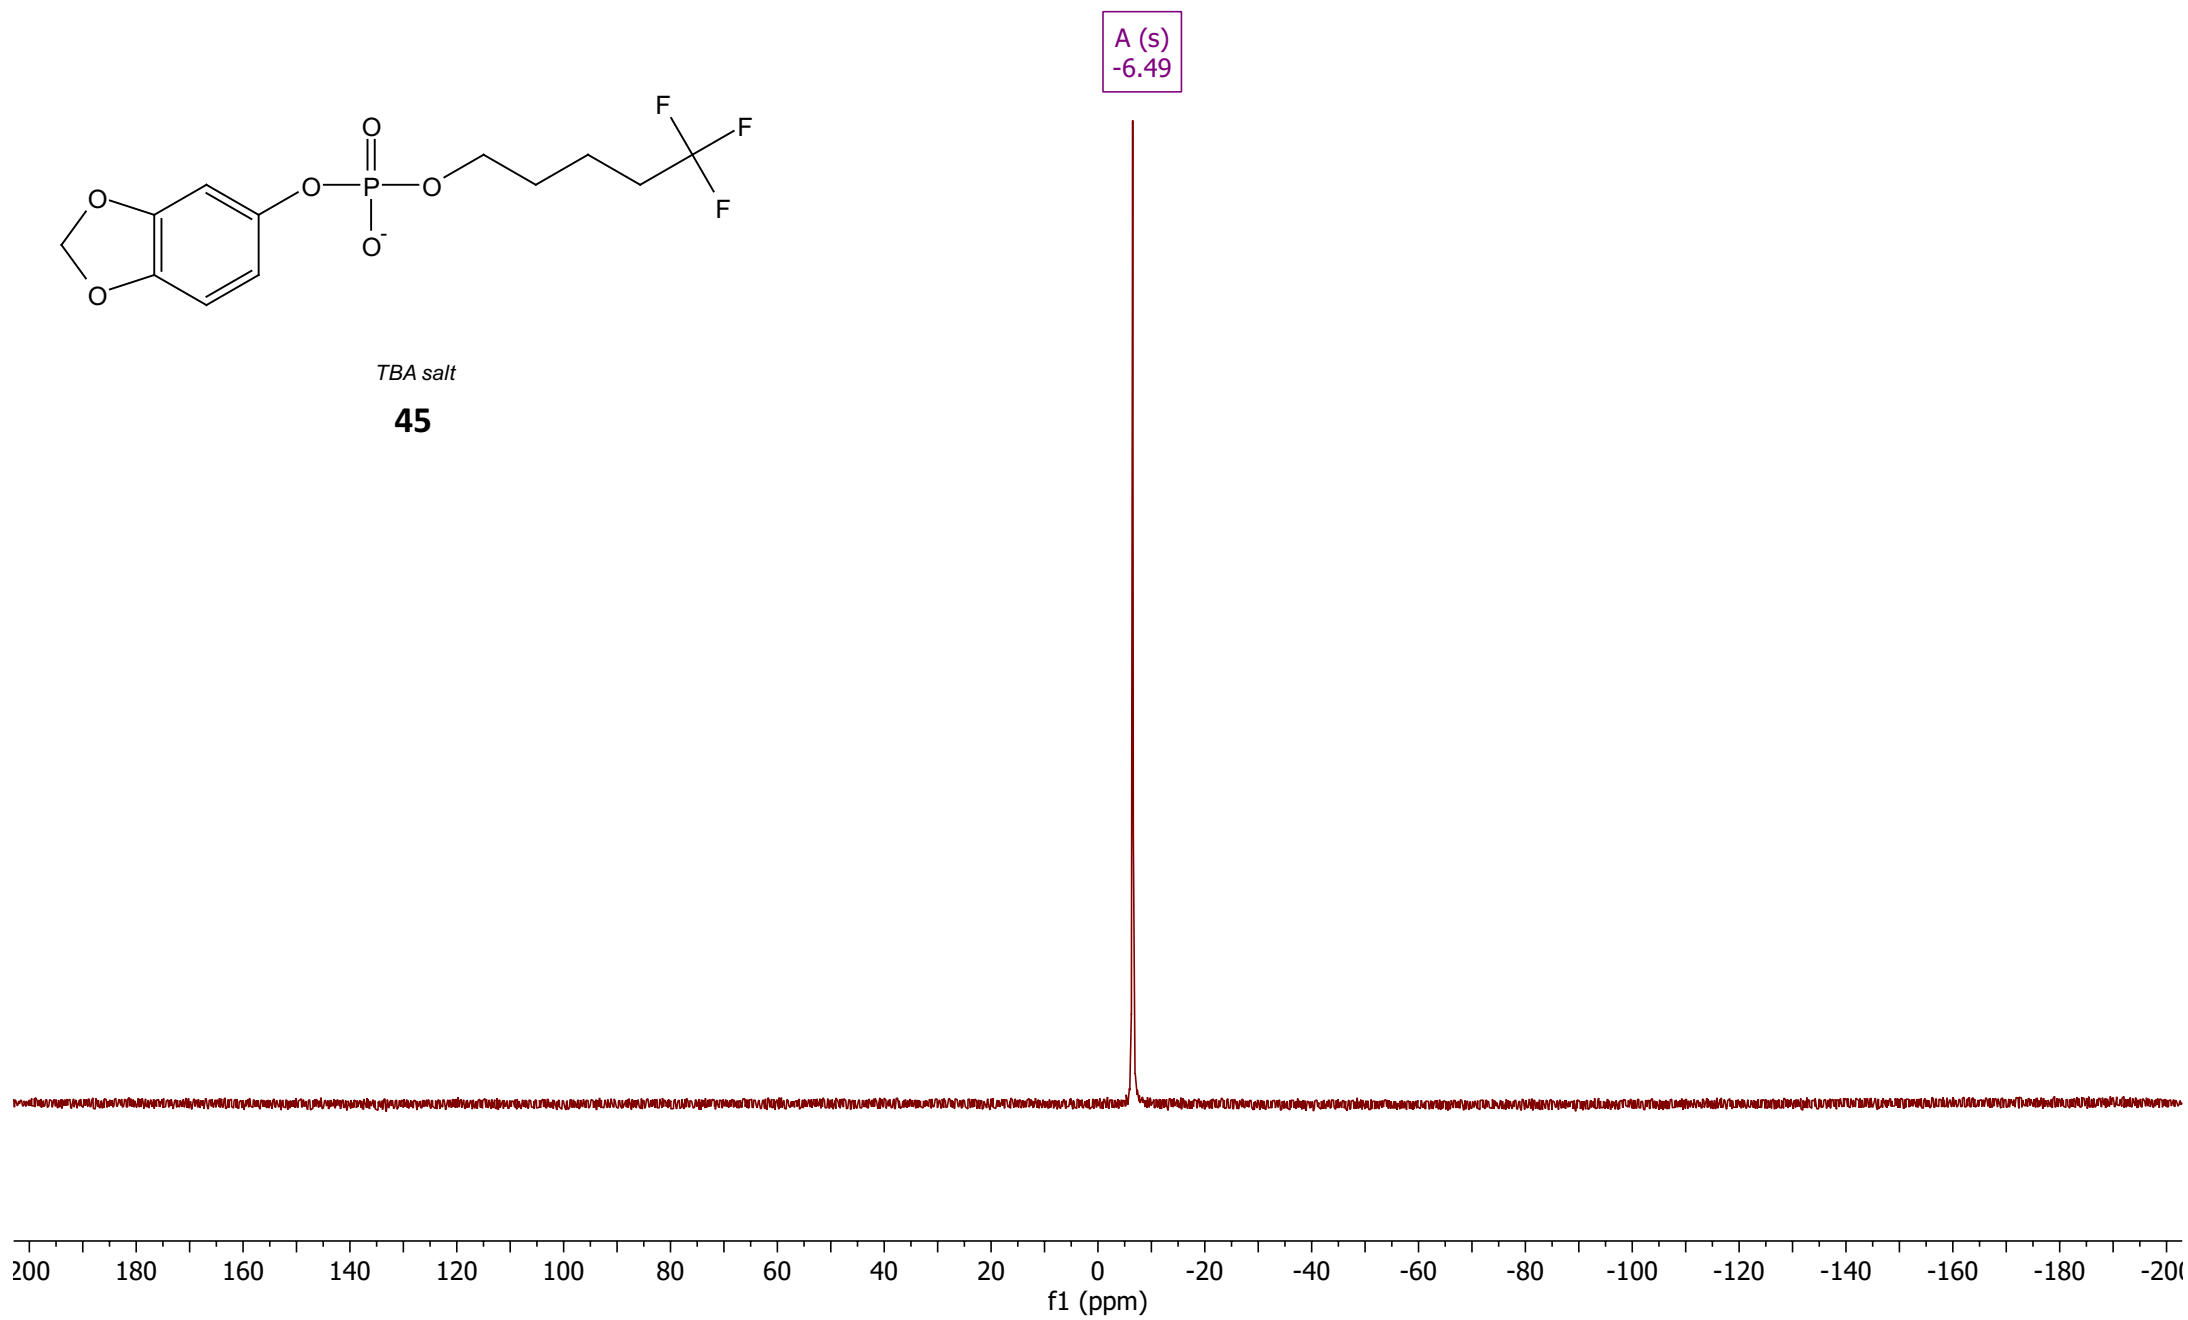

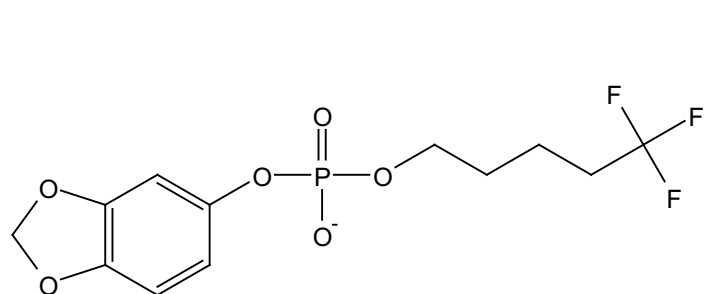

TBA salt

**45**

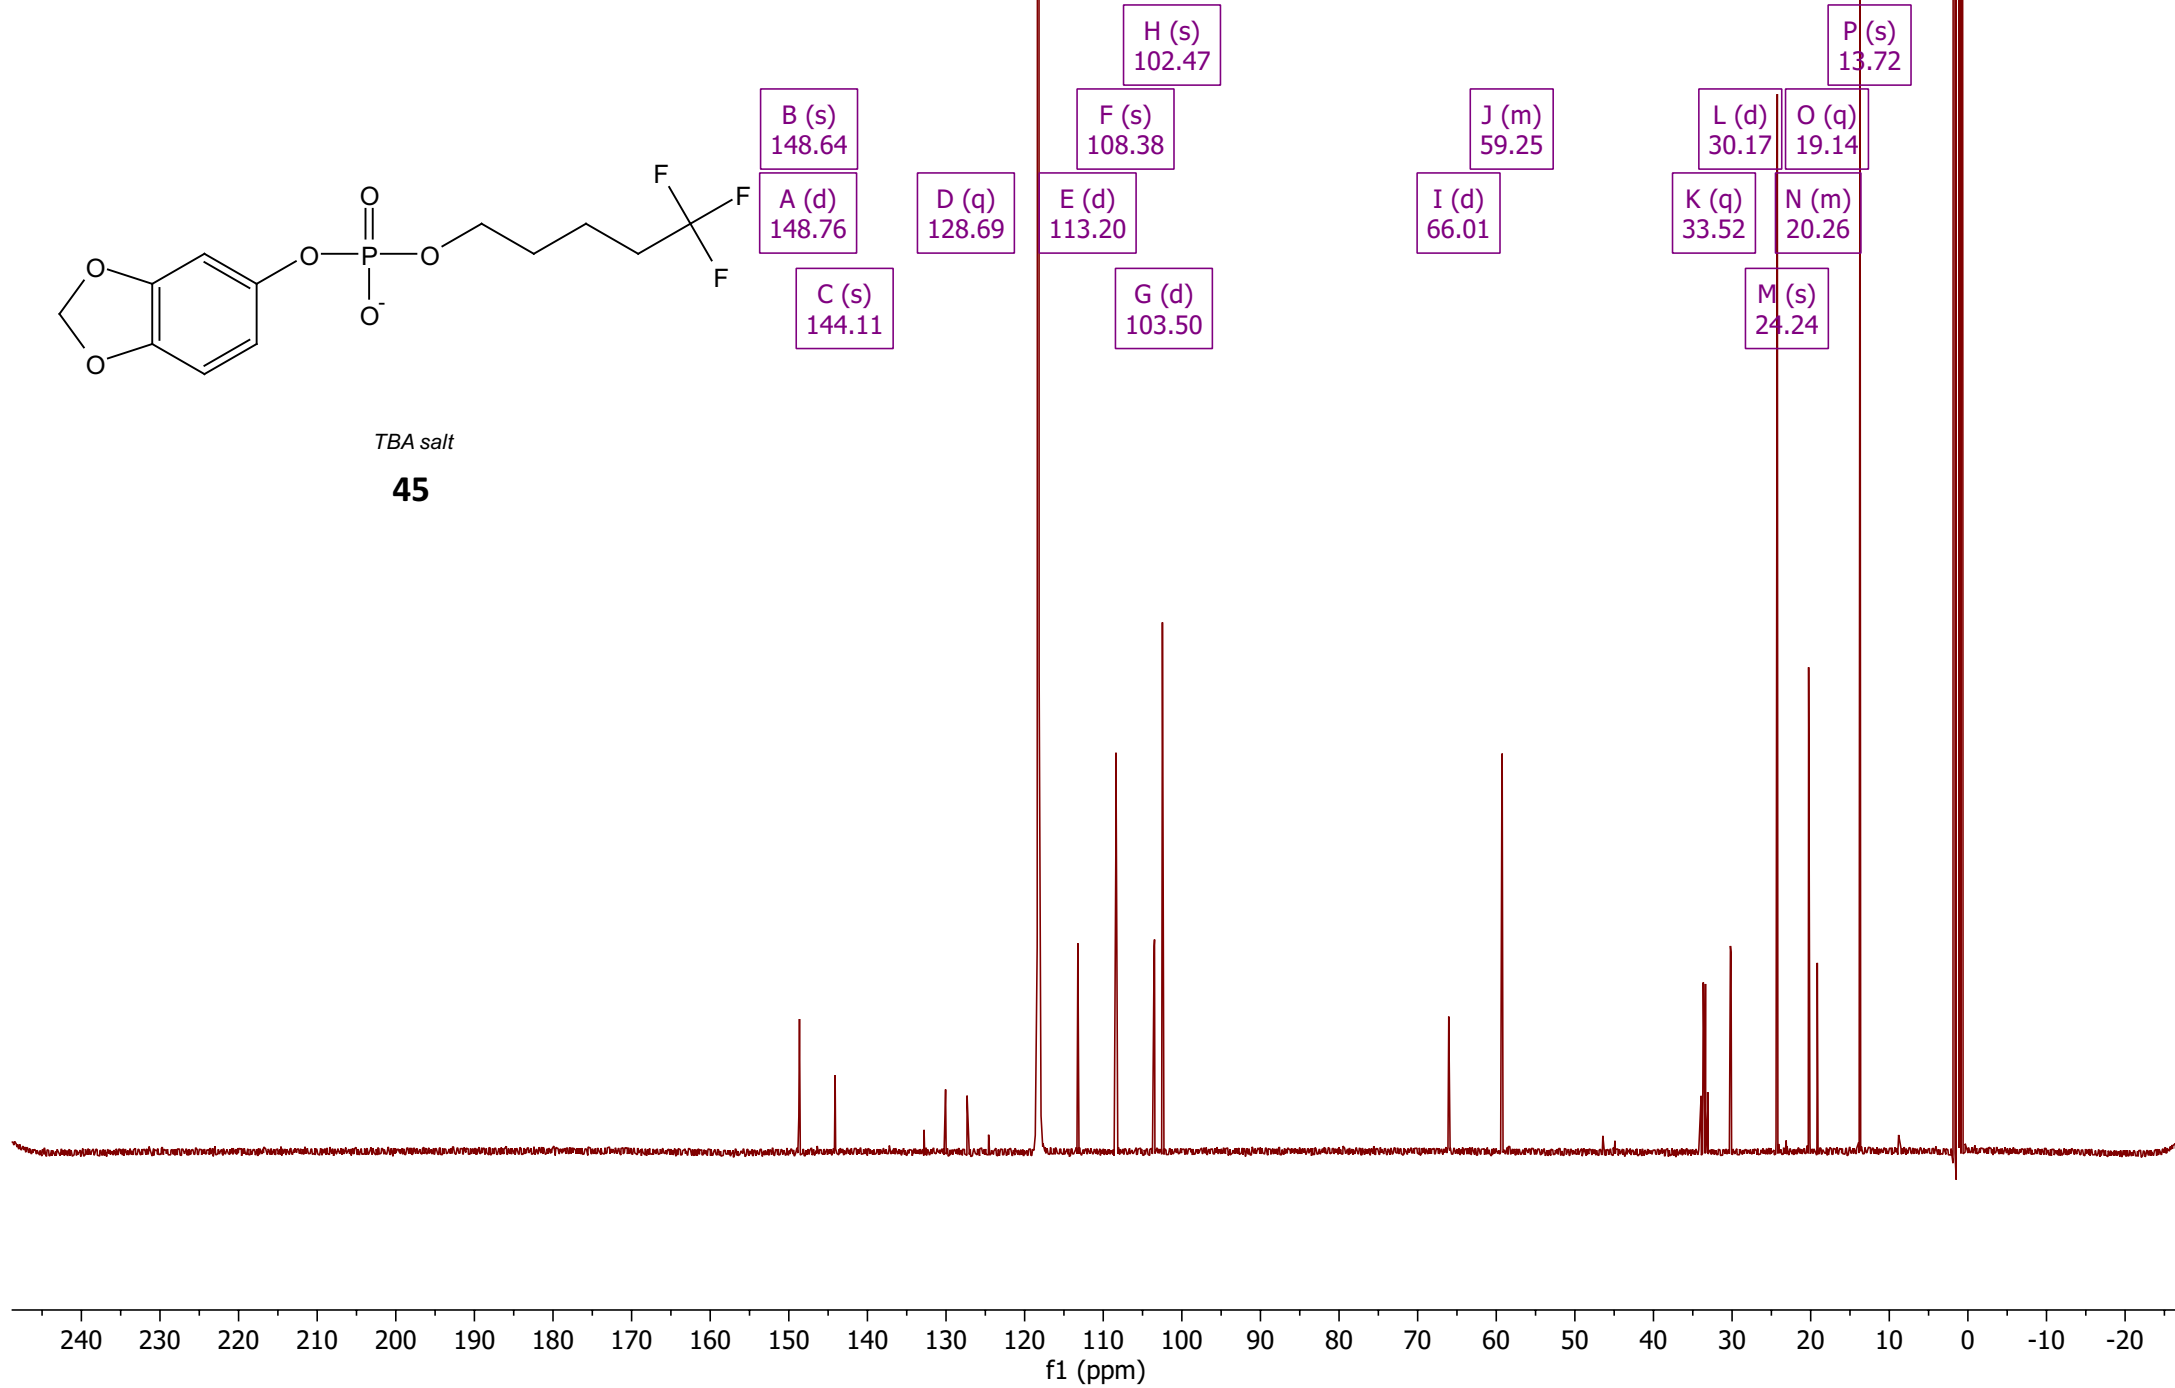

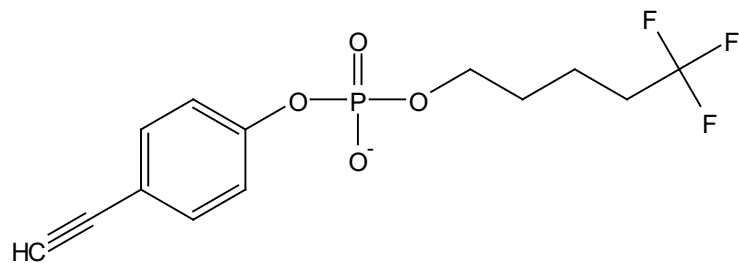

TBA salt

**46**

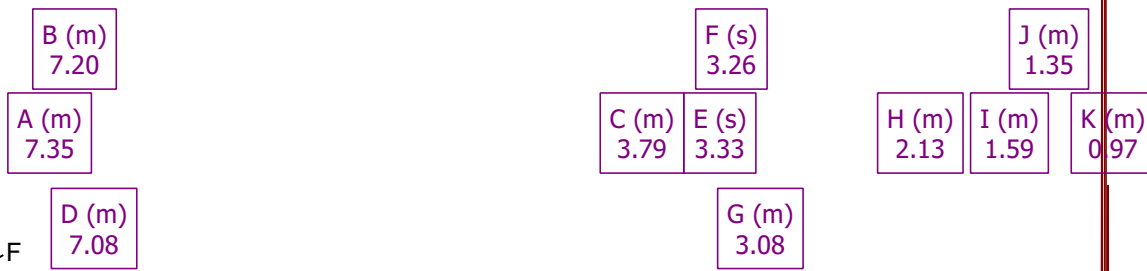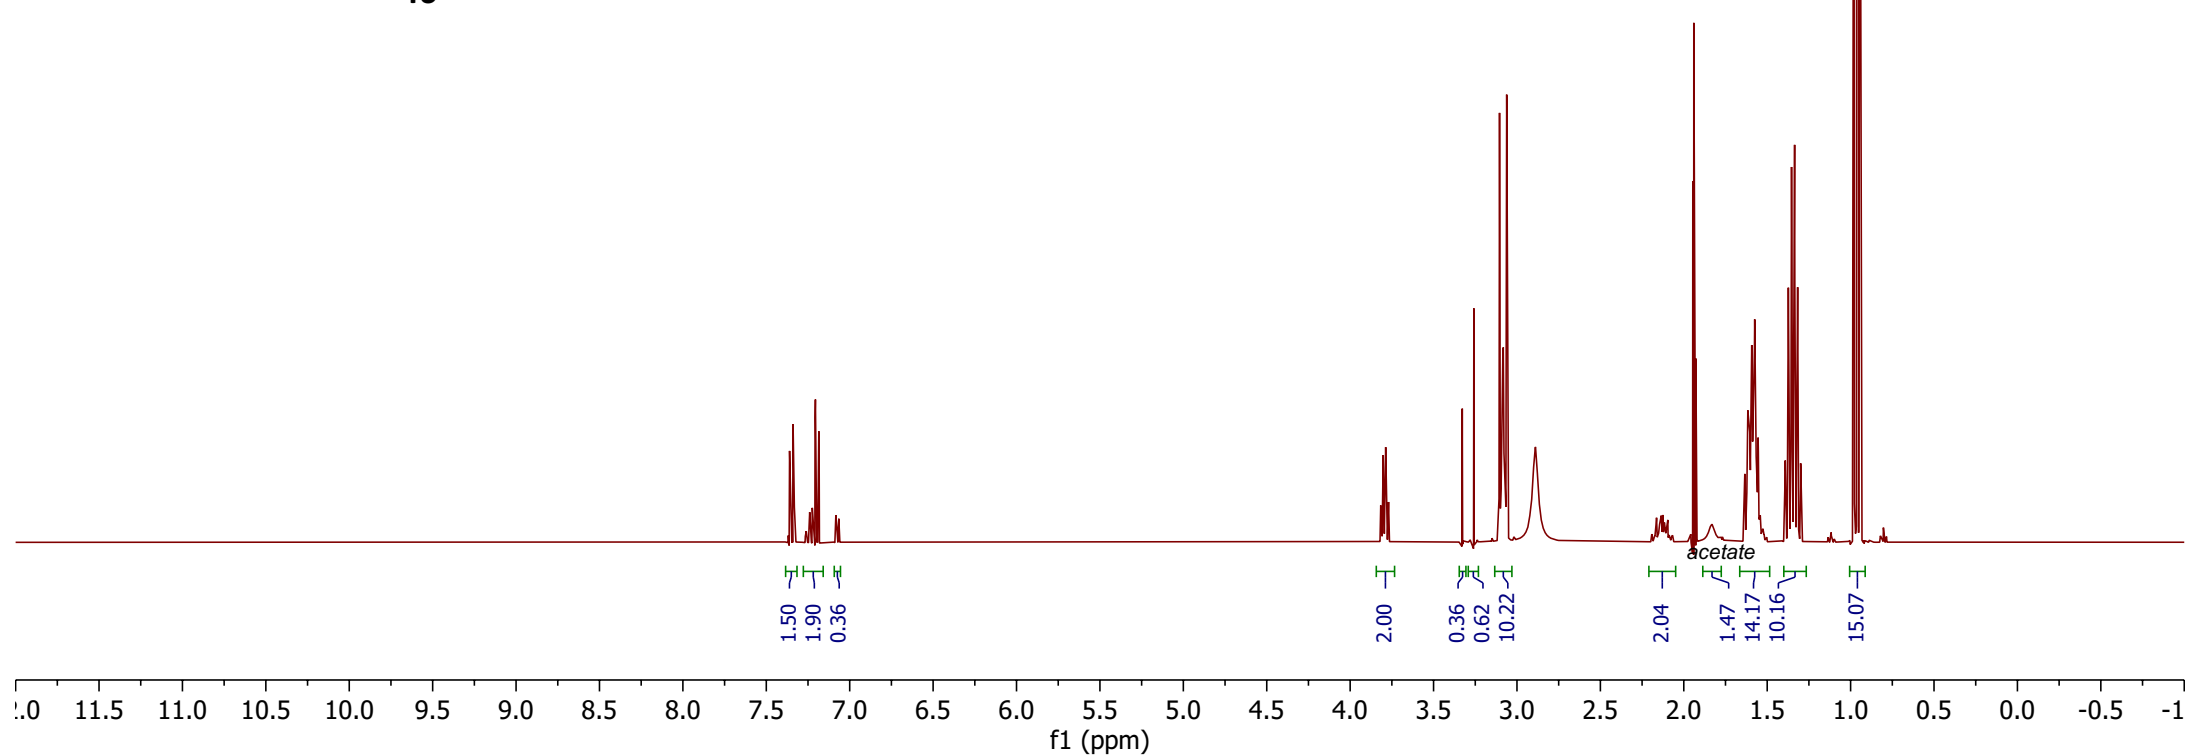

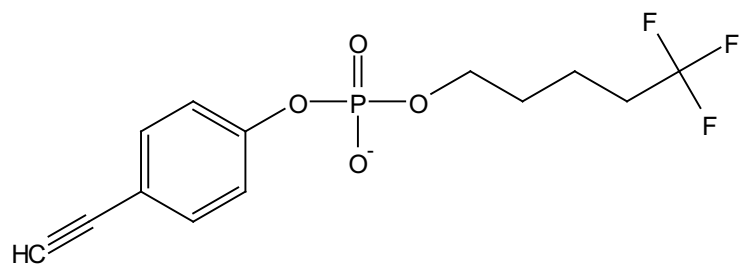

TBA salt

**46**

A (m)  
-66.99

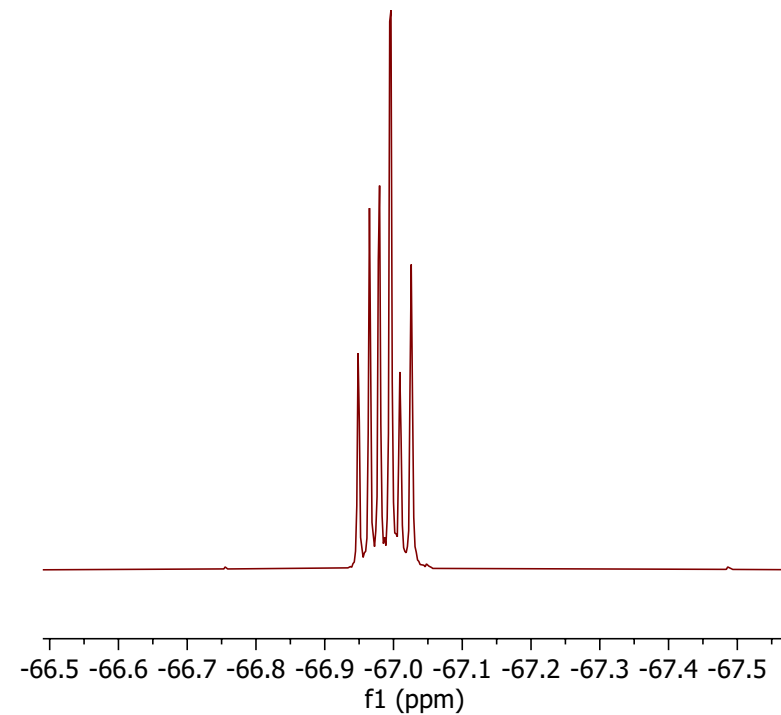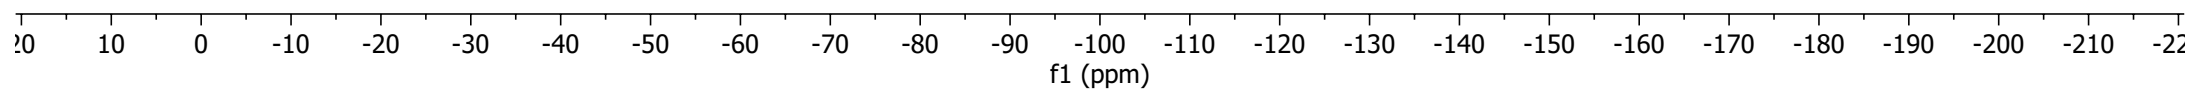





TBA salt

**46**

B (s)  
-5.61

A (s)  
-5.77

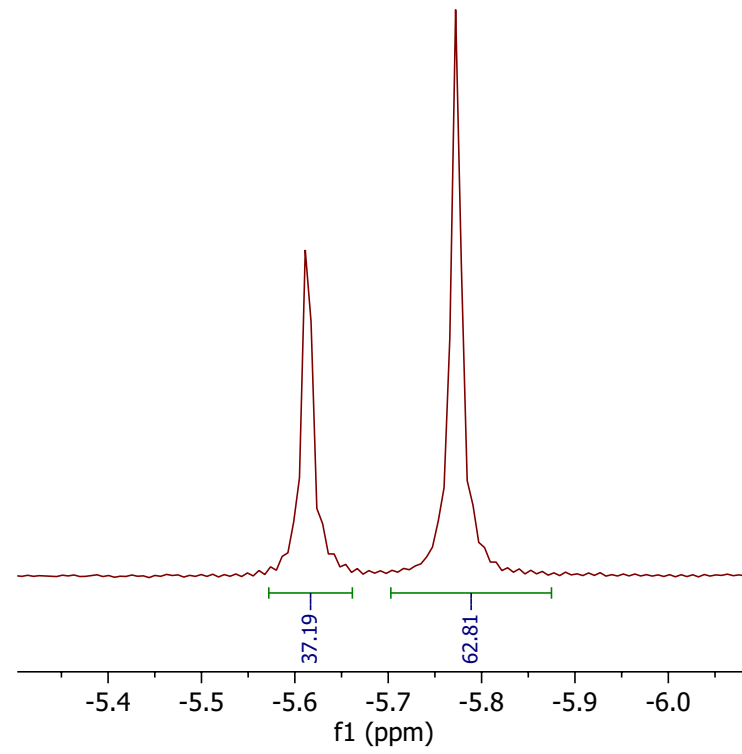

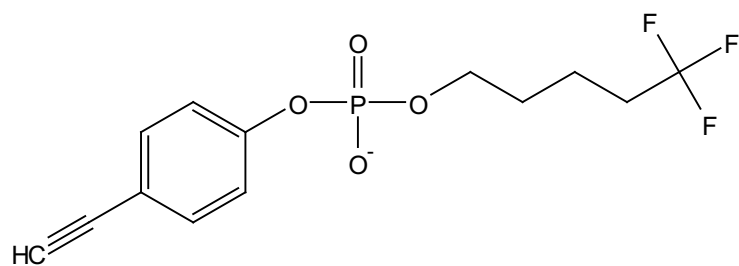

TBA salt

**46**

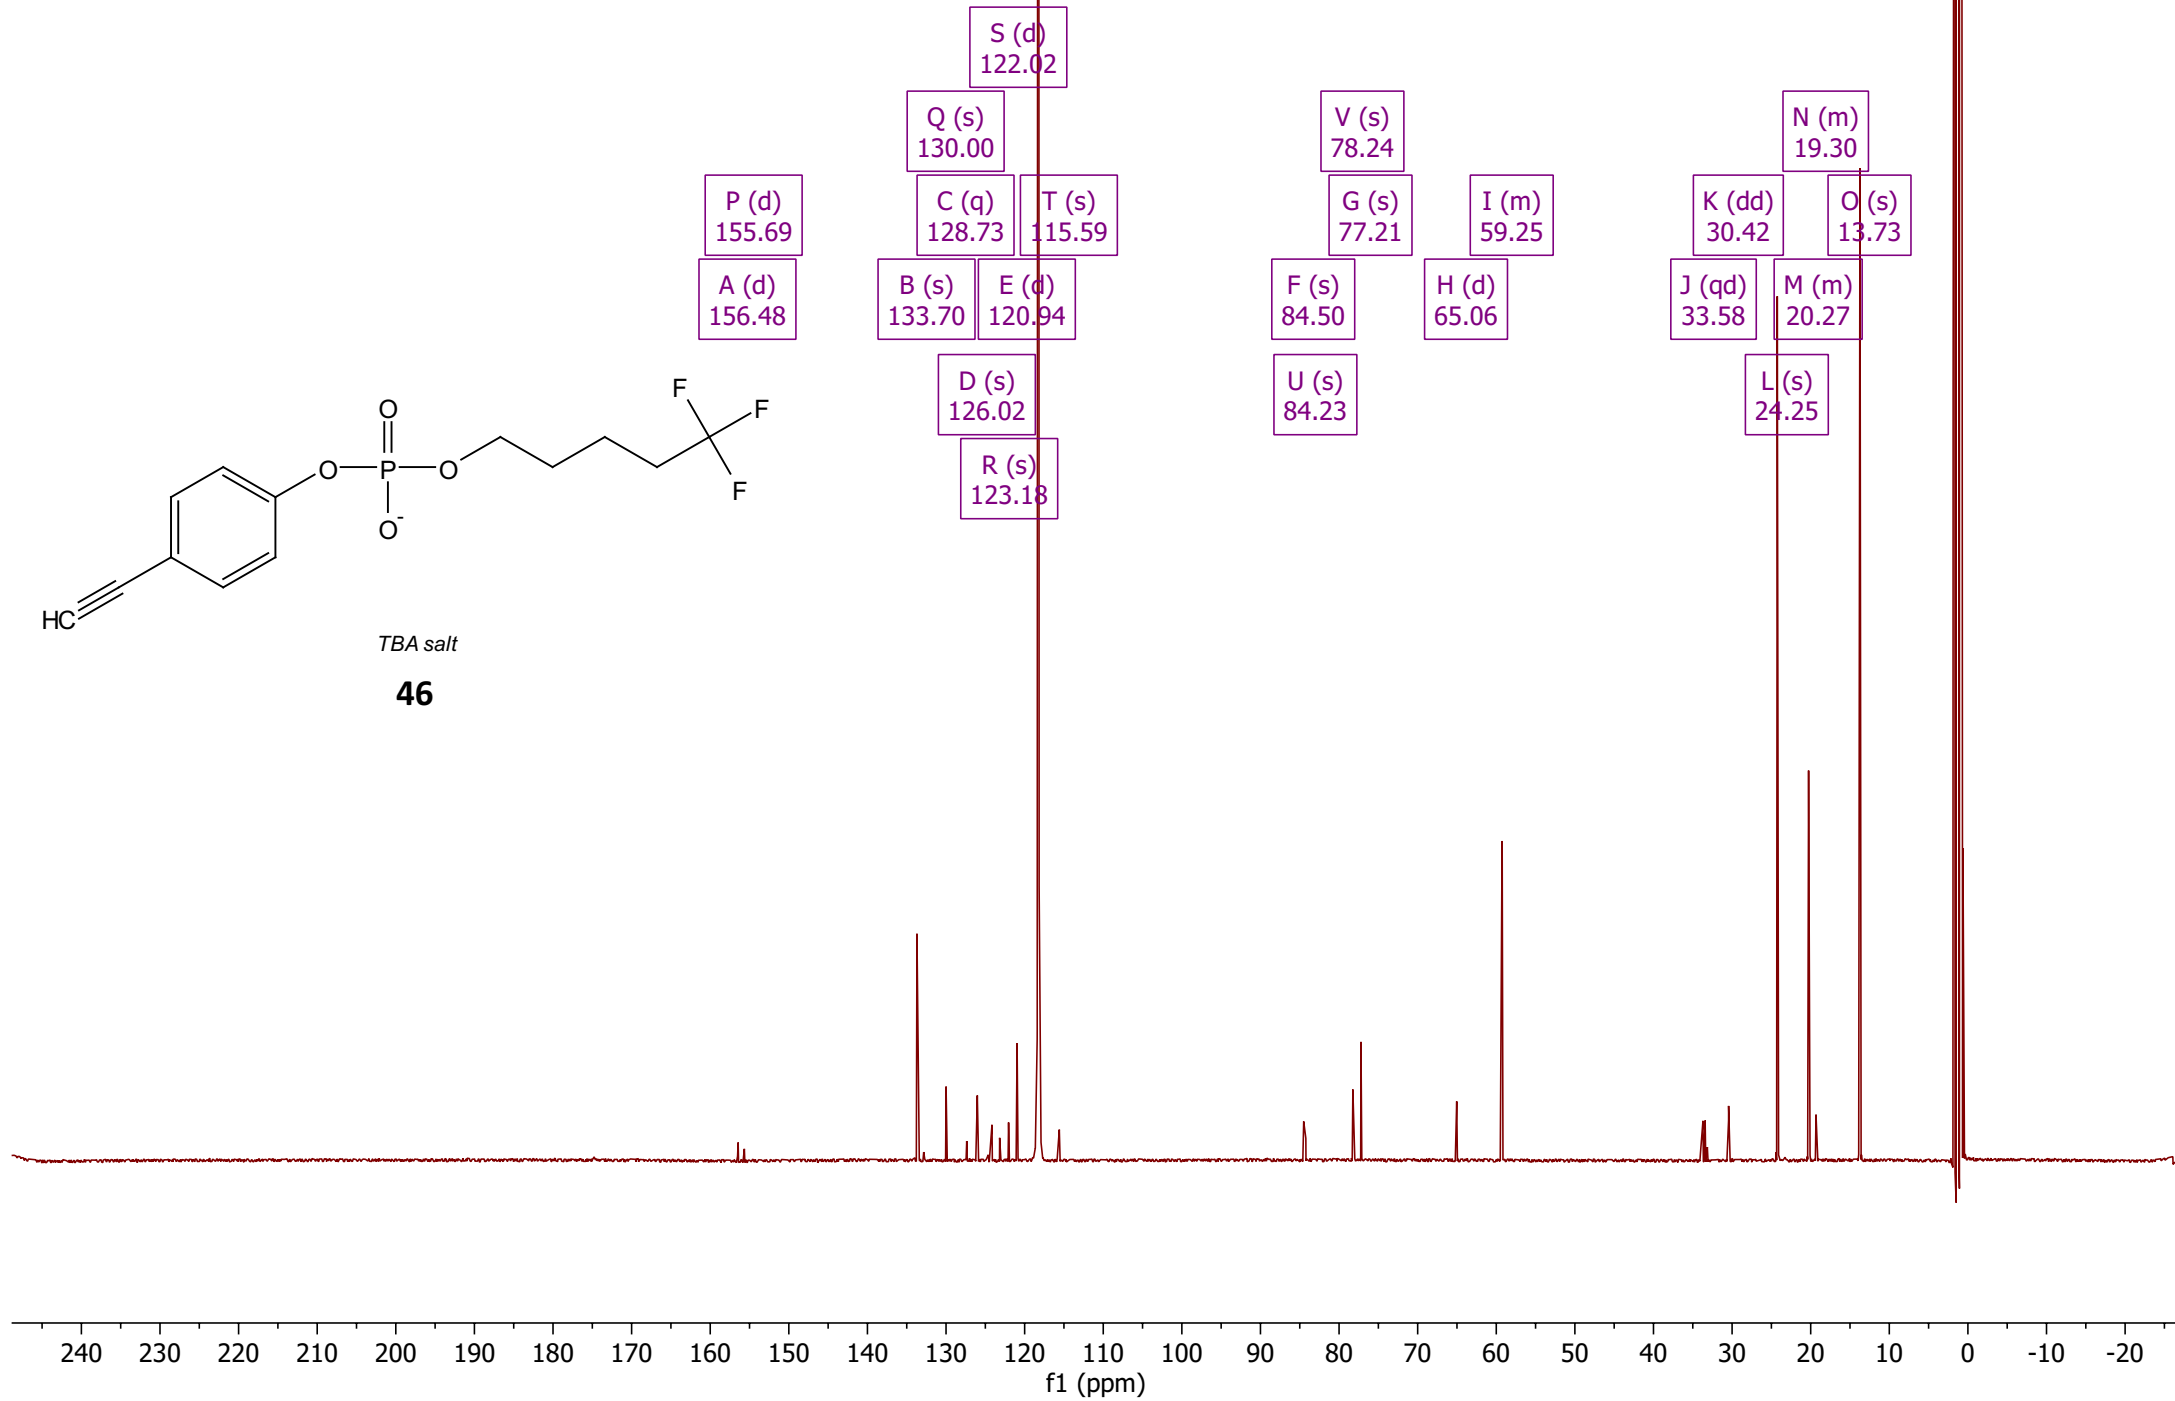

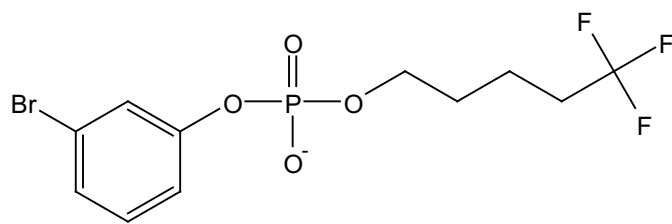

TBA salt

**47**

A (ddd)  
7.45

B (m)  
7.14

C (m)  
3.81

D (m)  
3.08

E (m)  
2.13

F (m)  
1.59

G (m)  
1.36

H (t)  
0.96

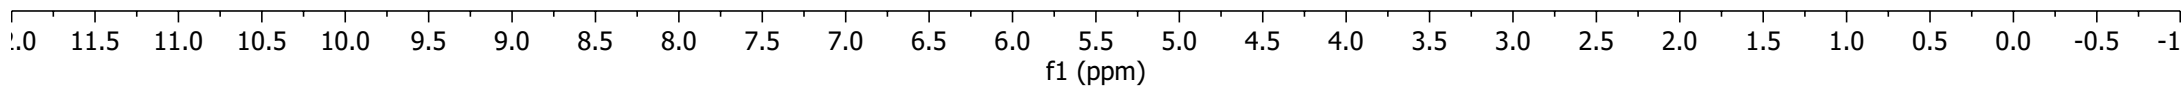

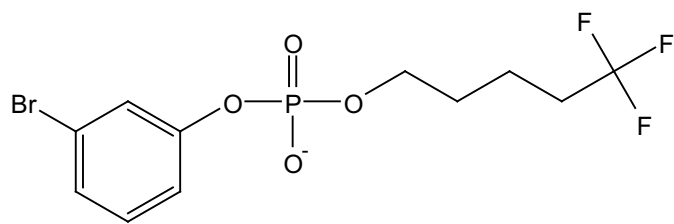

TBA salt

**47**

A (t)  
-66.99

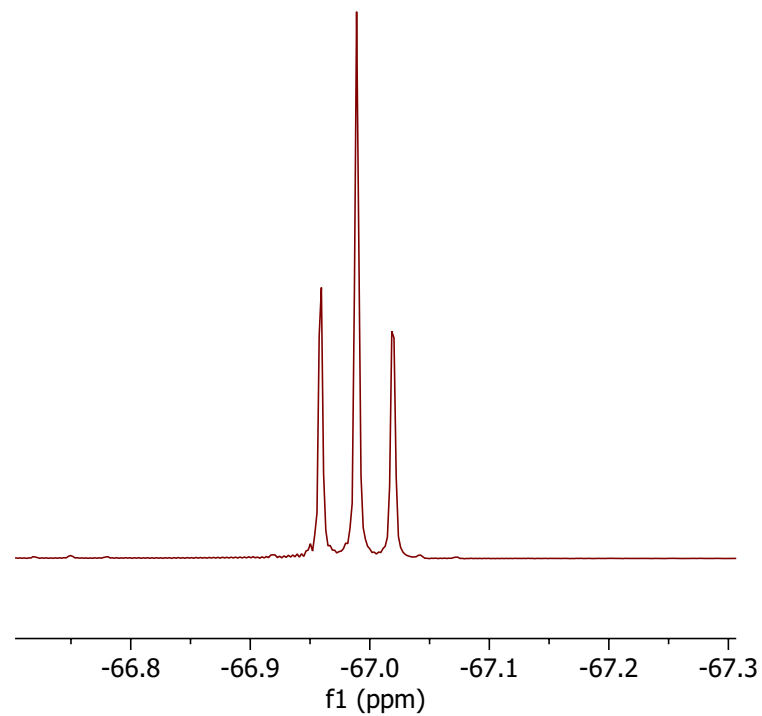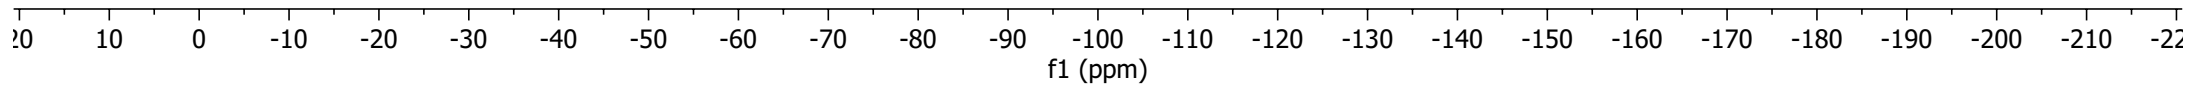



TBA salt

**47**

A (s)  
-6.02

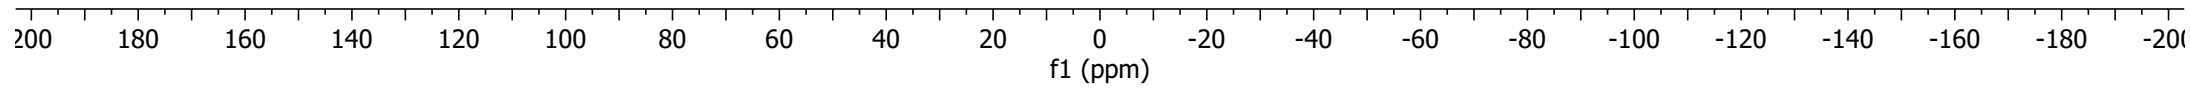

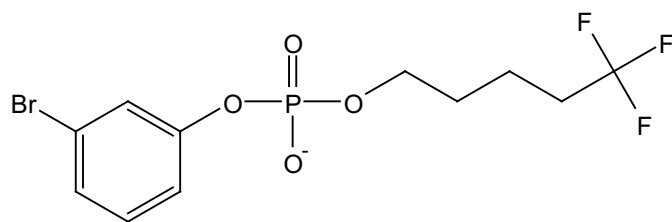

TBA salt

**47**

A (d)  
155.64

C (s)  
130.29

B (q)  
127.72

D (s)  
124.48

F (s)  
121.33

E (d)  
123.01

G (d)  
118.97

H (d)  
64.28

I (m)  
58.33

J (q)  
32.64

K (d)  
29.44

L (s)  
23.31

M (m)  
19.33

N (q)  
18.37

O (s)  
12.79

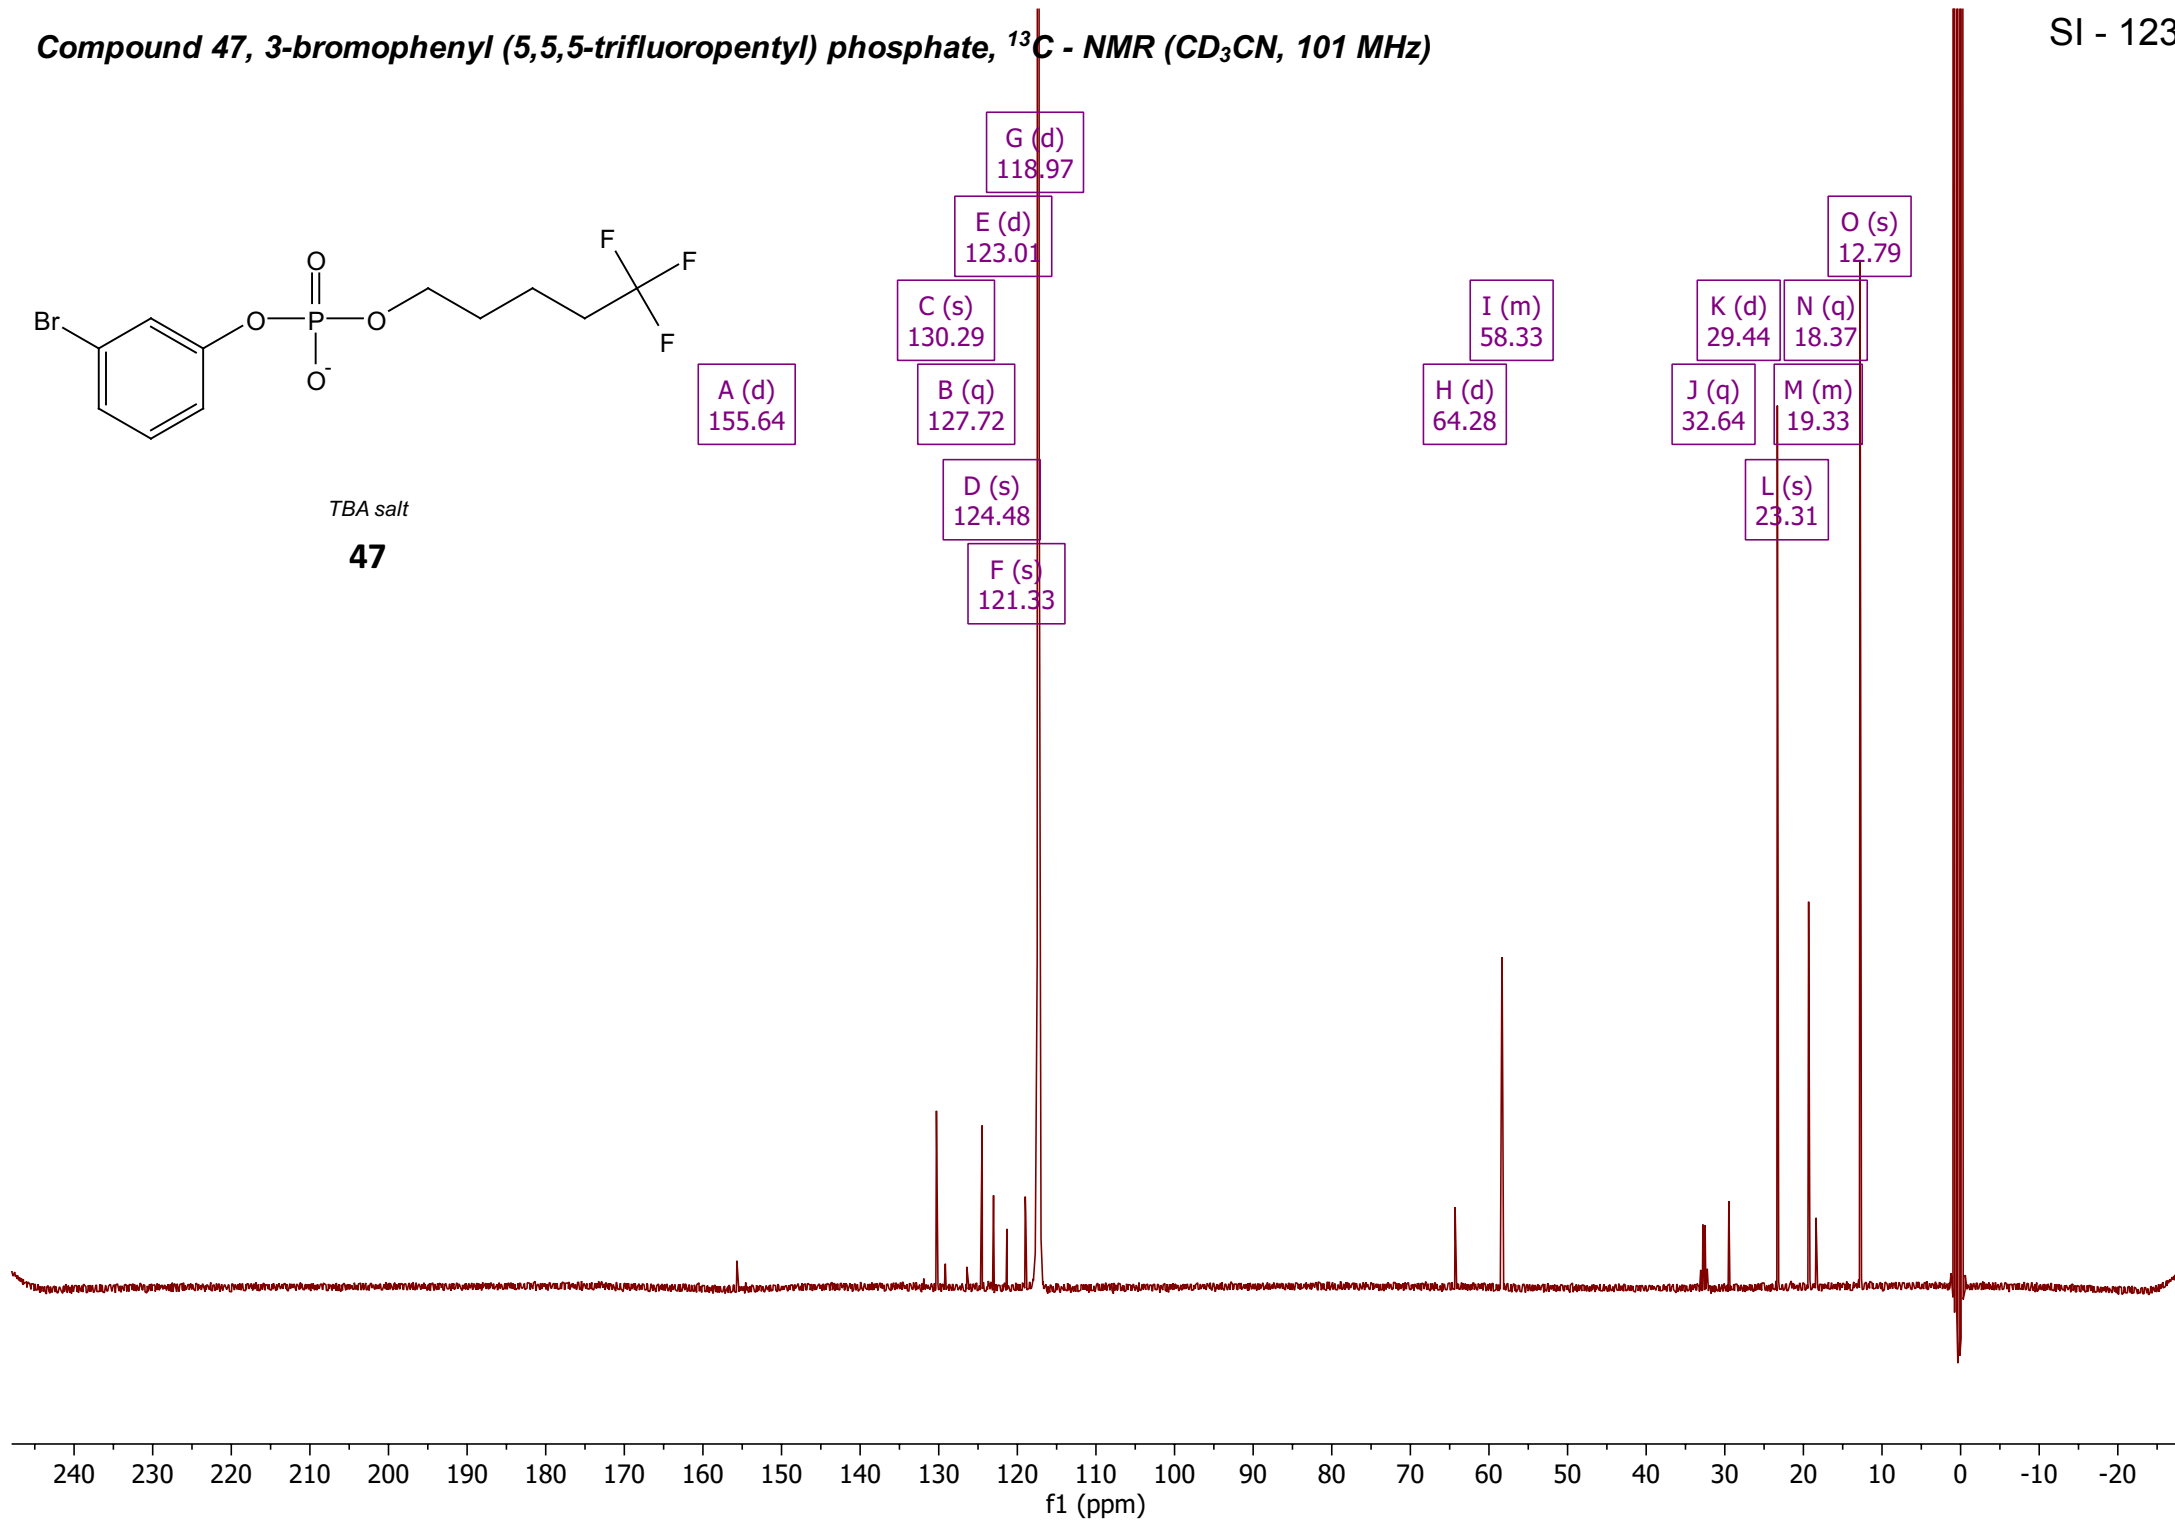

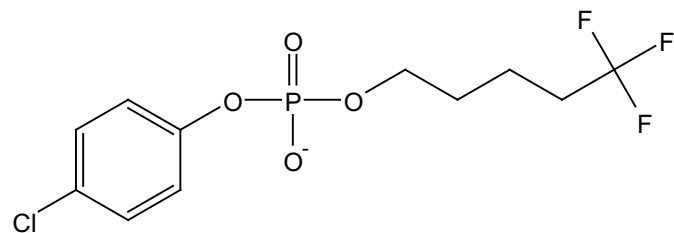

TBA salt

**48**

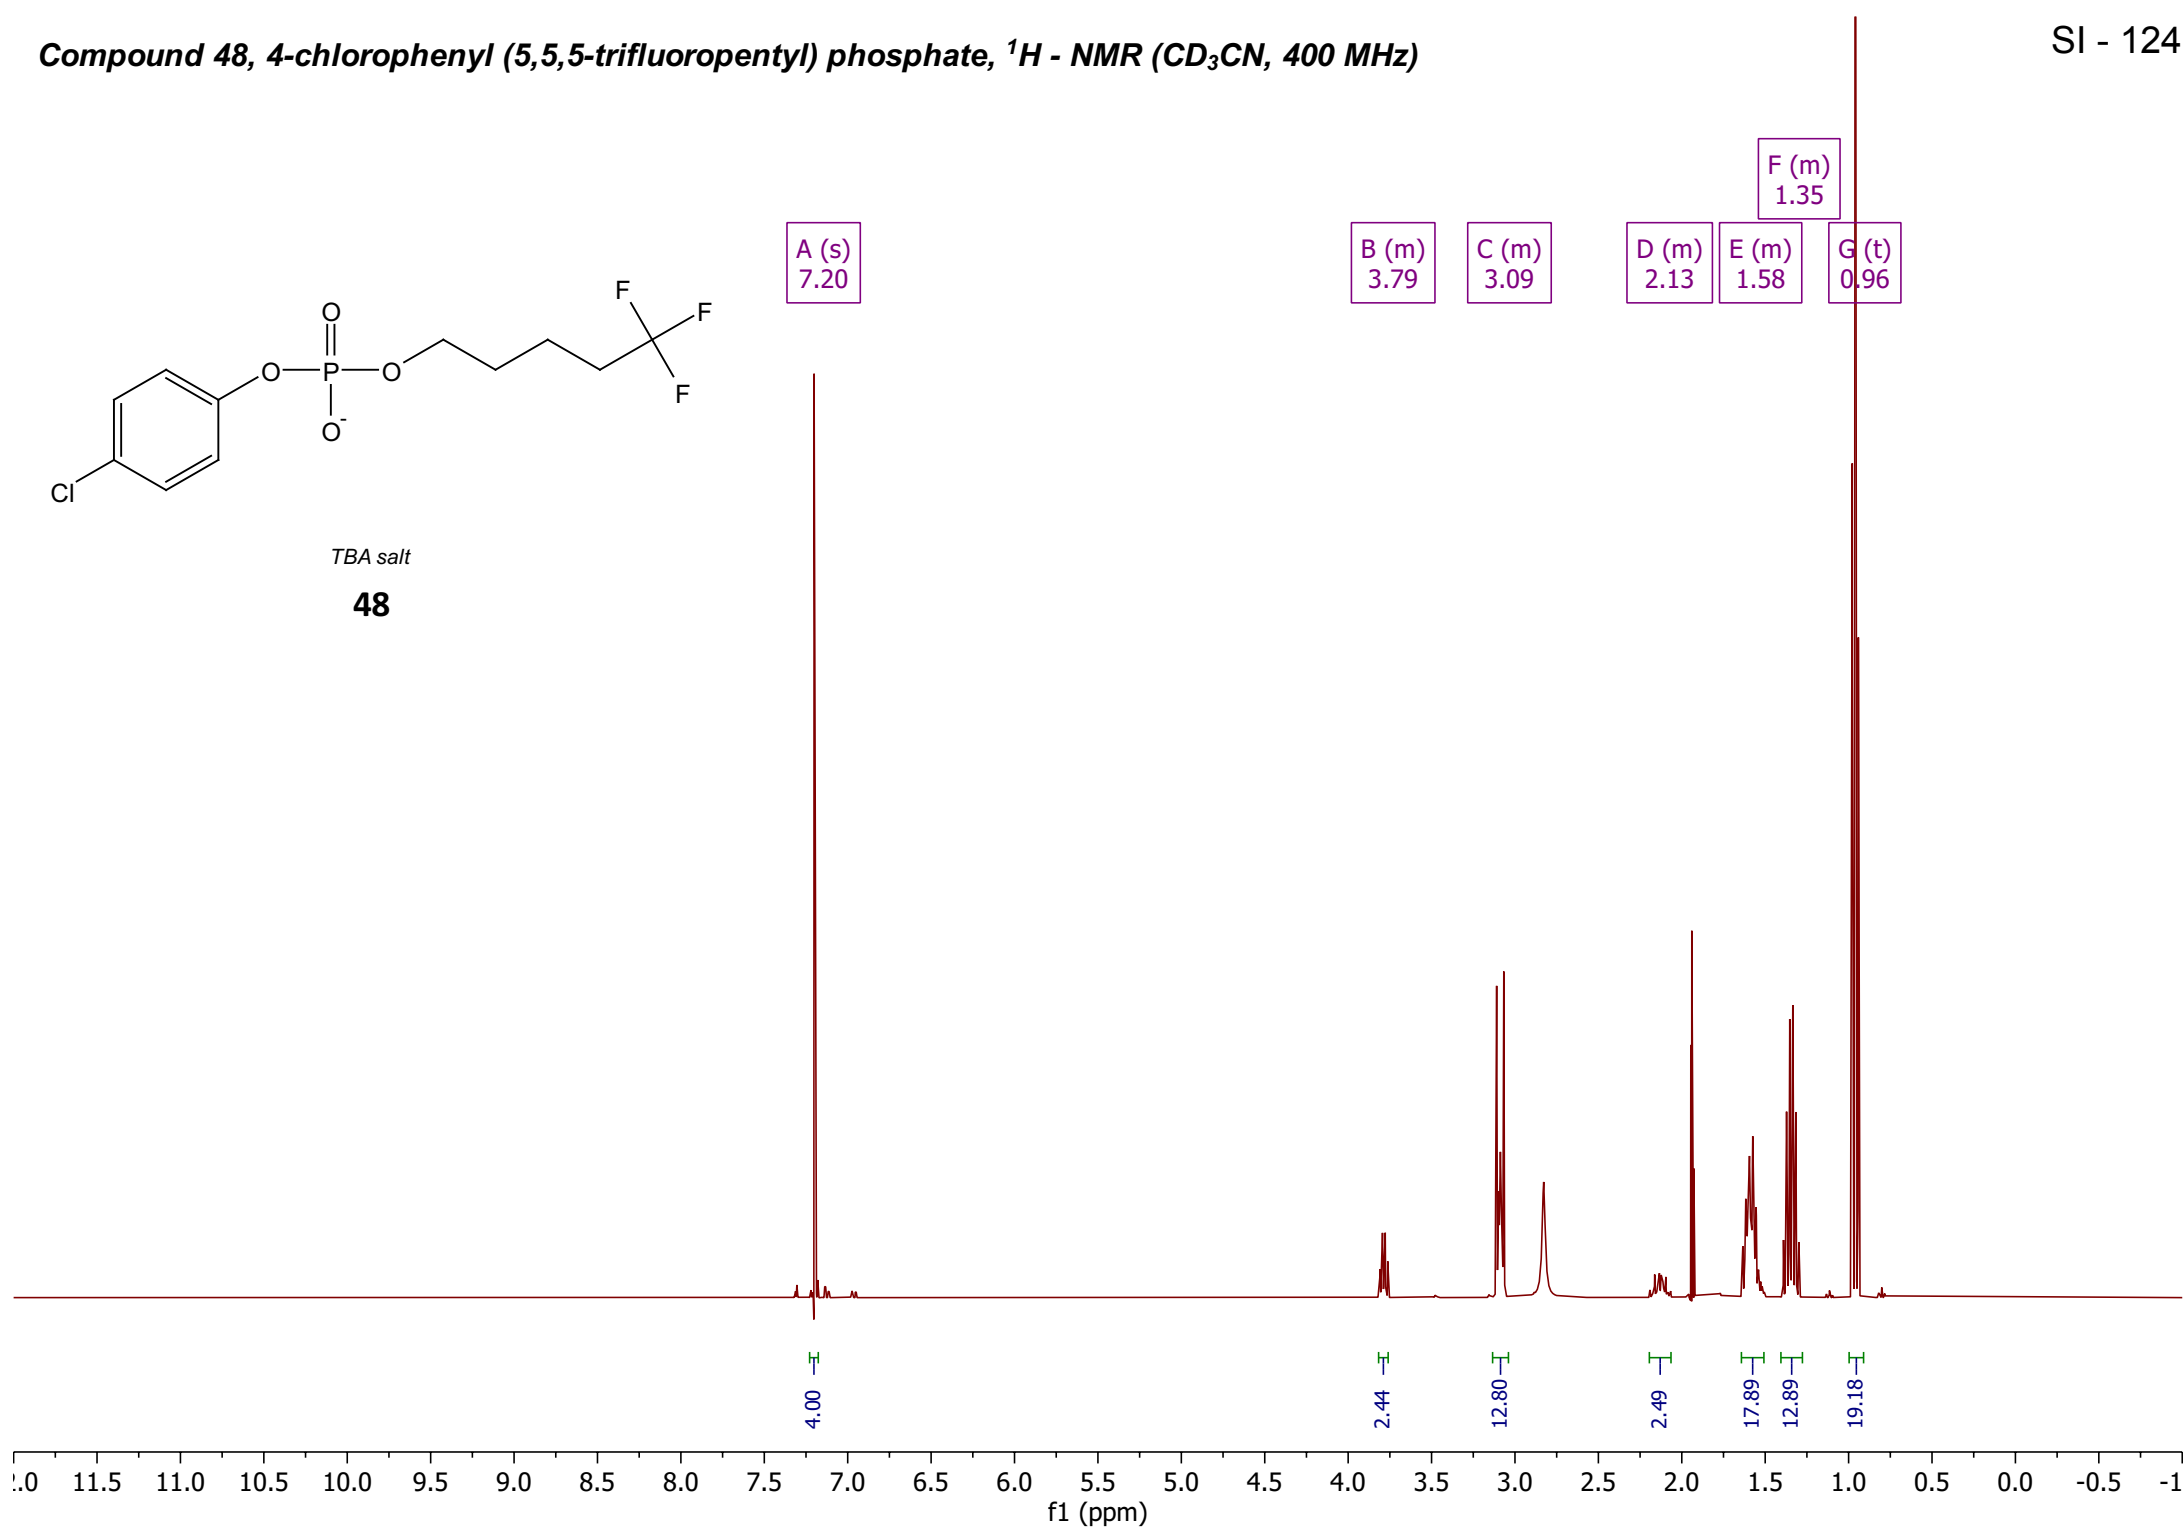



TBA salt

**48**

A (t)  
-66.99

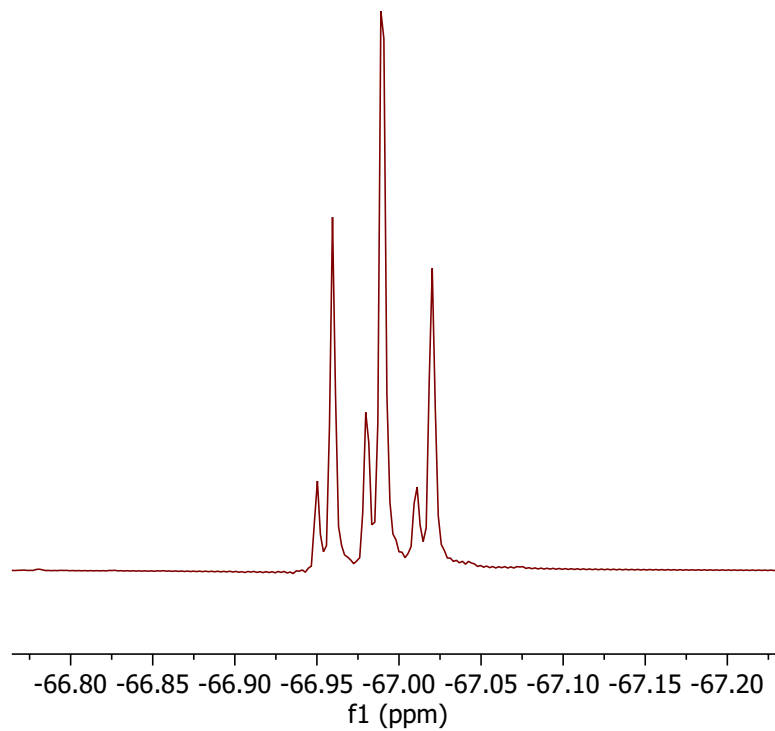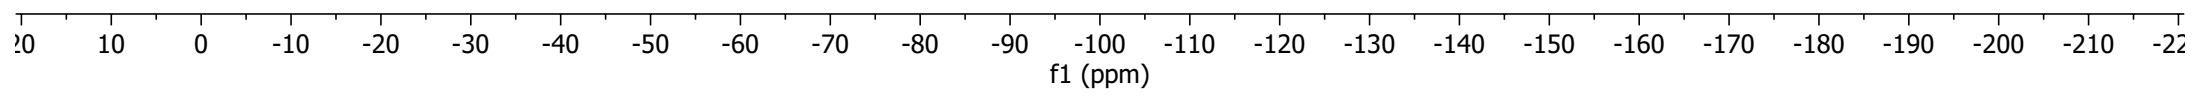



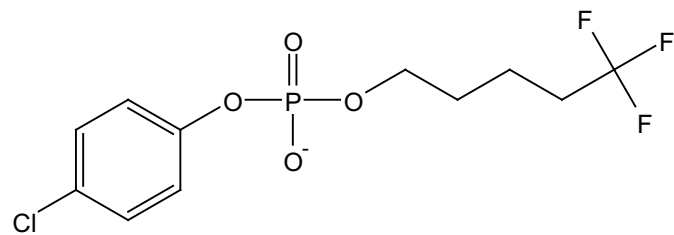

TBA salt

**48**

A (s)  
-5.53



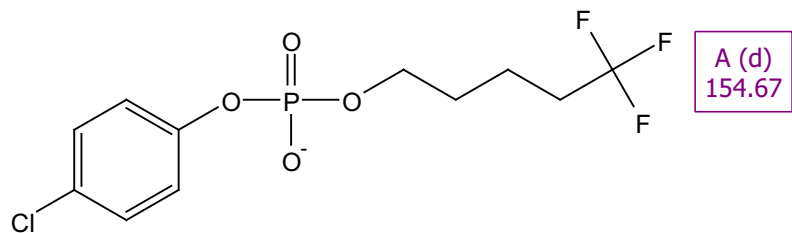

TBA salt

**48**

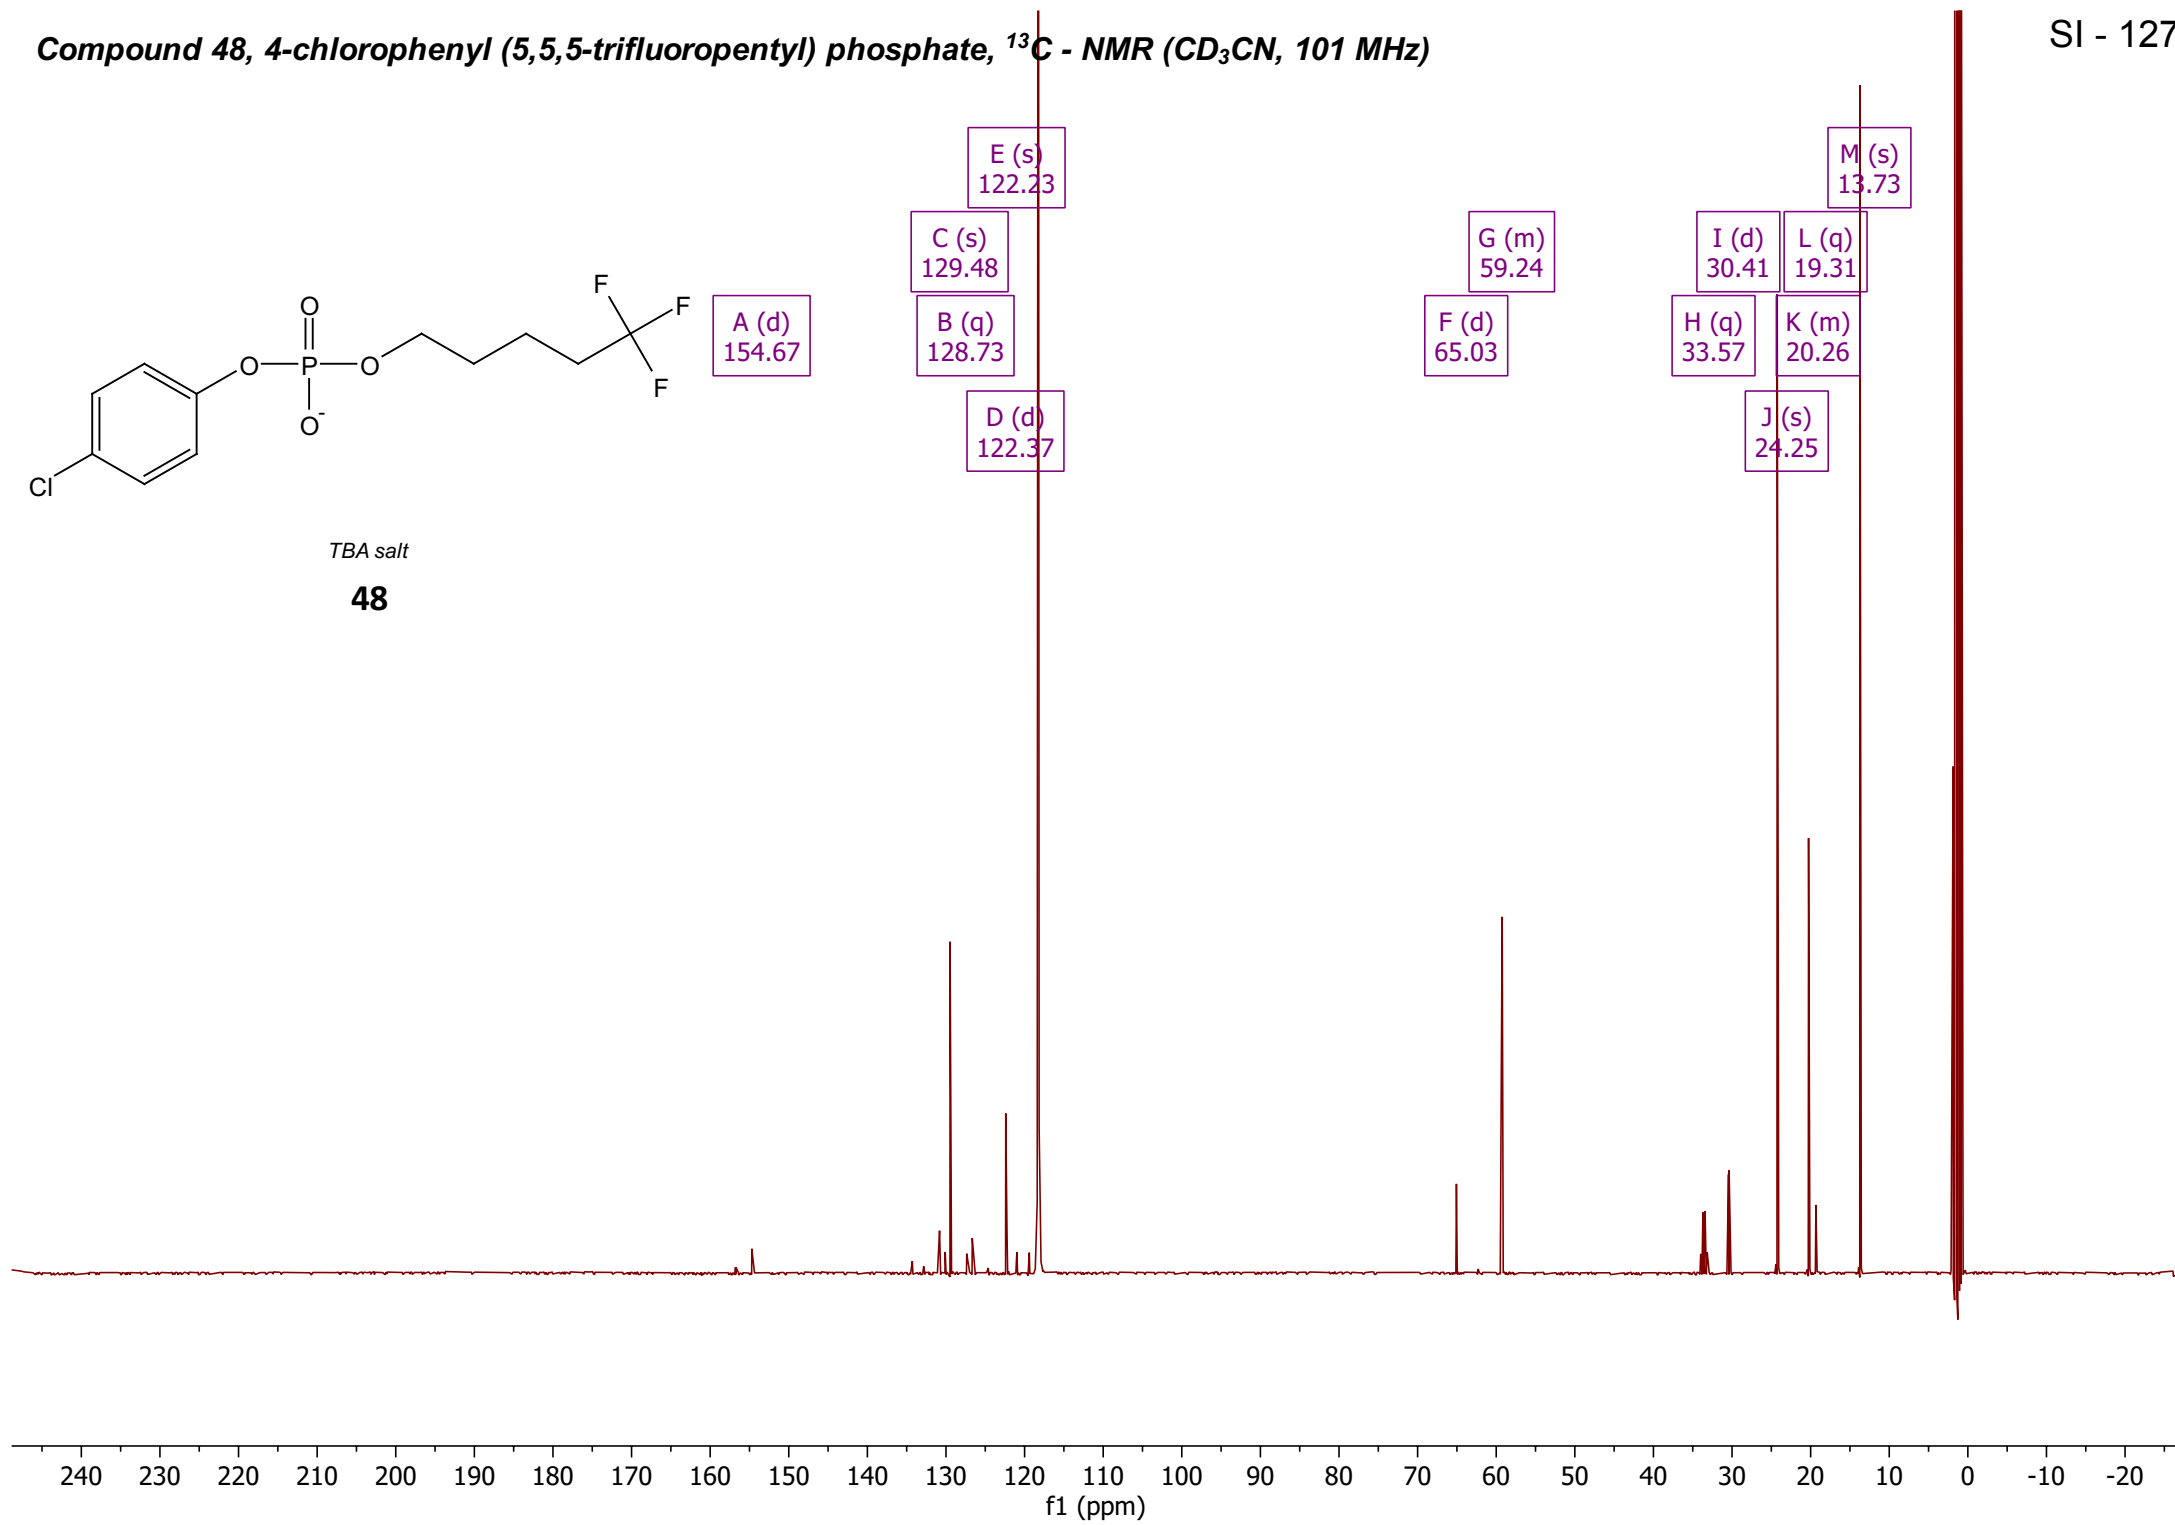

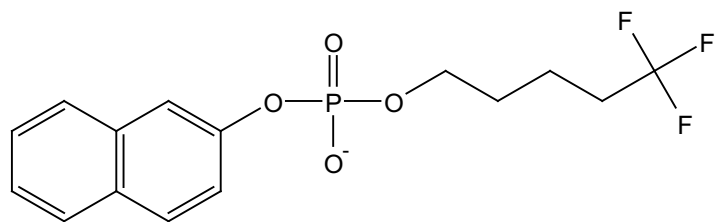

TBA salt

**49**

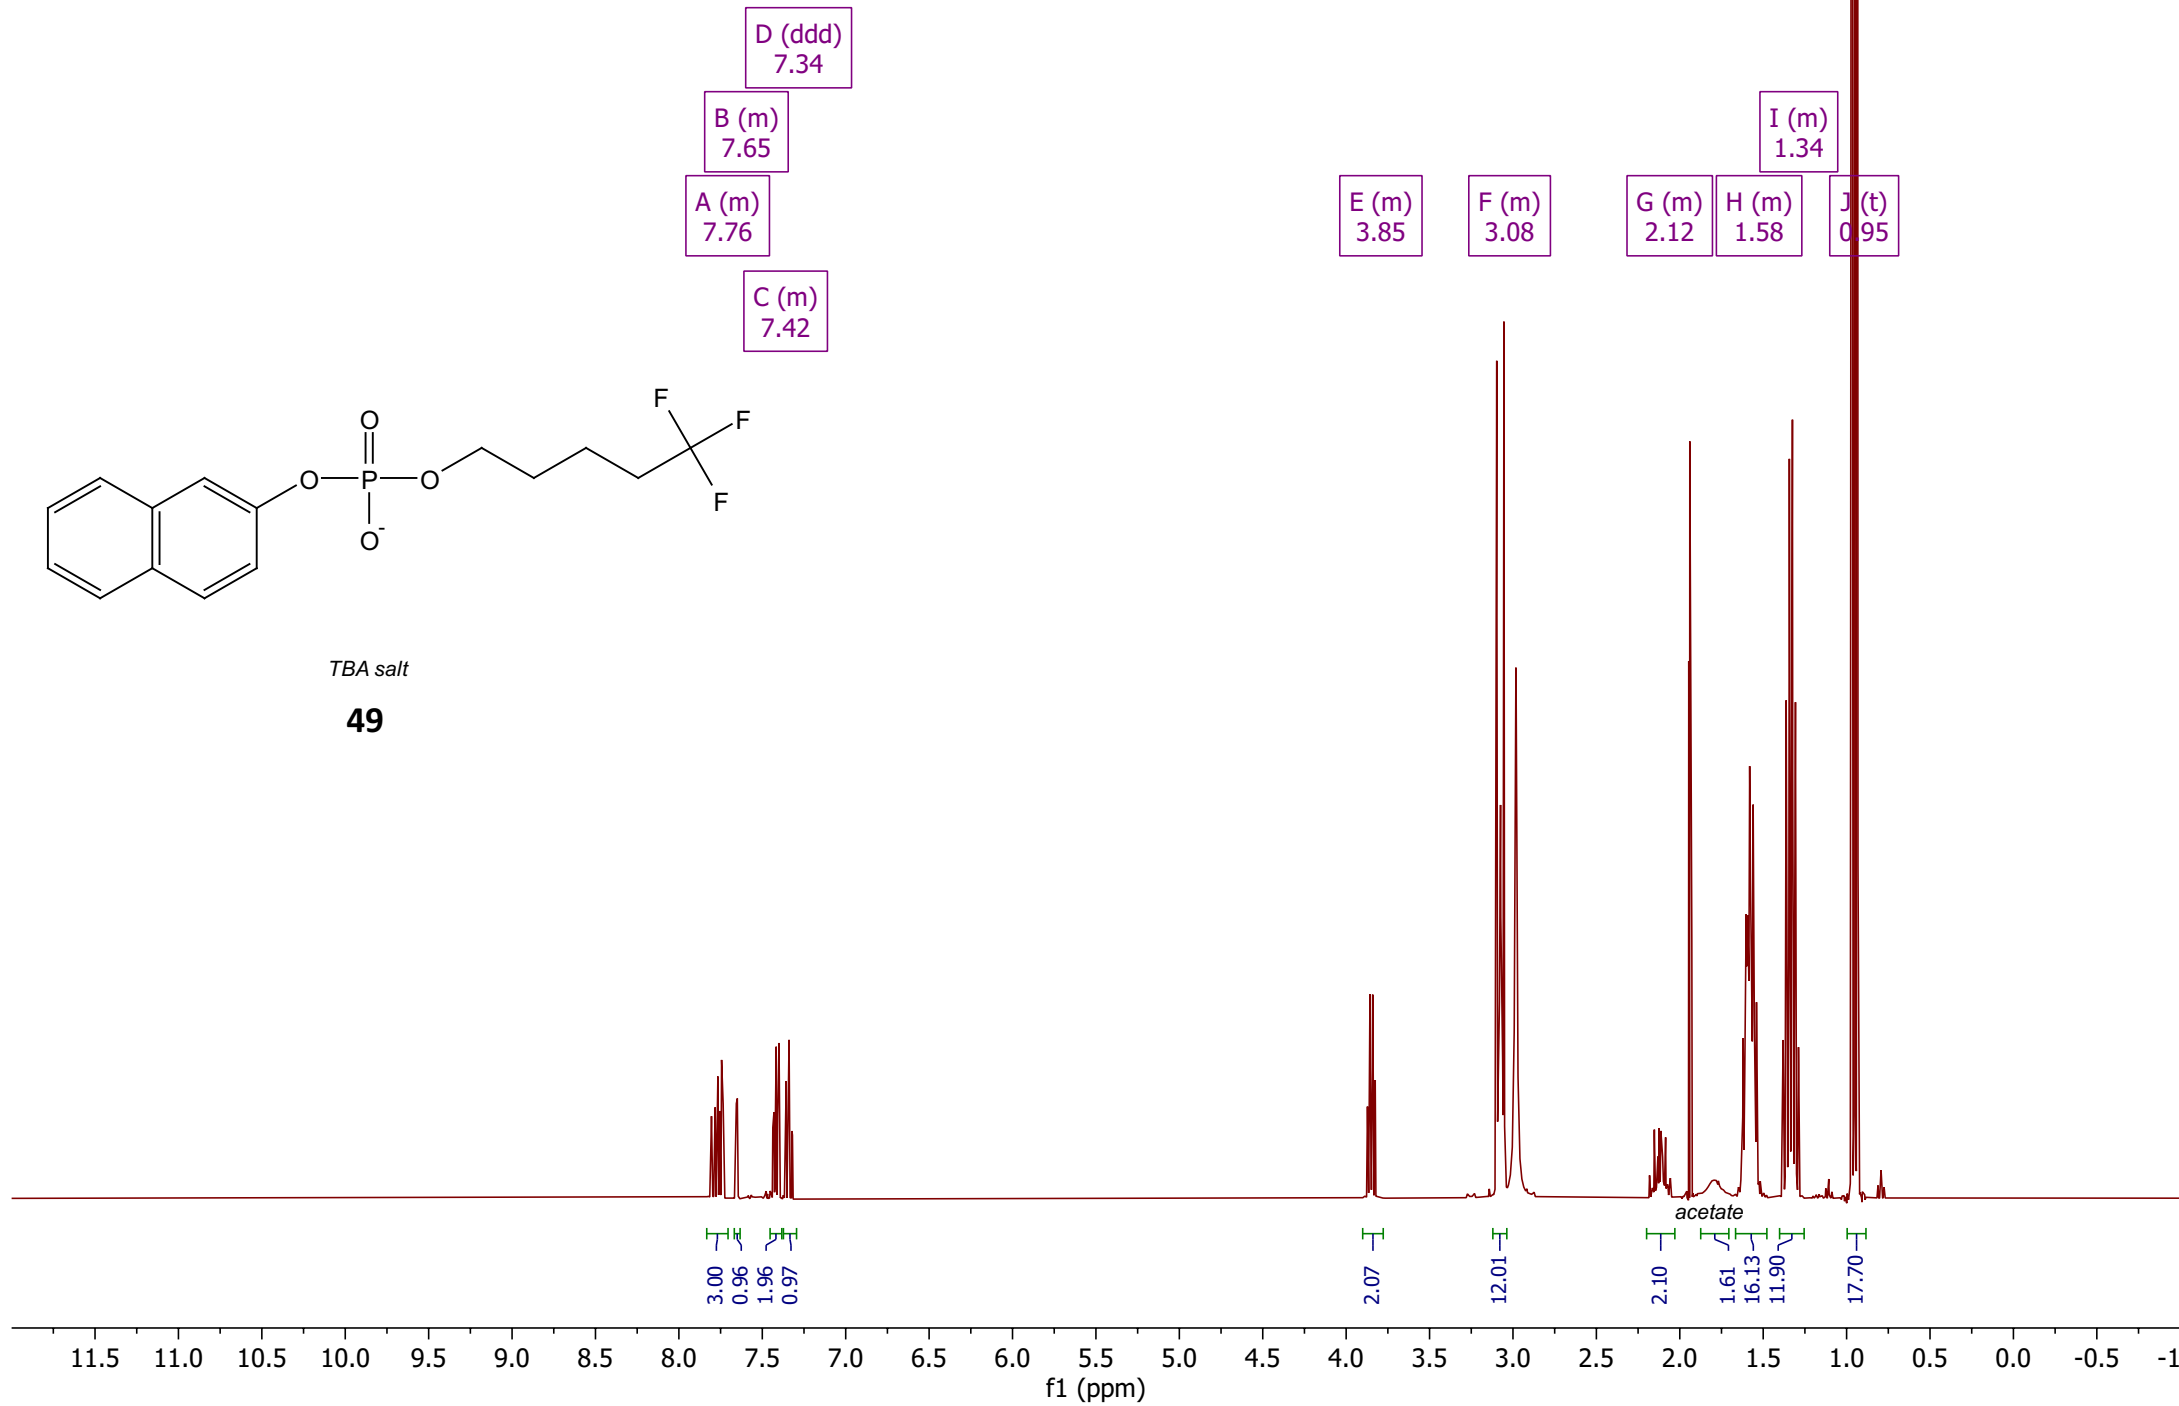

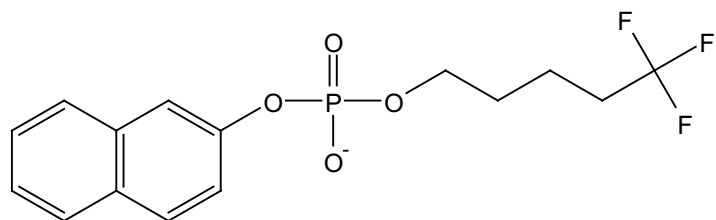

TBA salt

**49**

A (t)  
-66.98

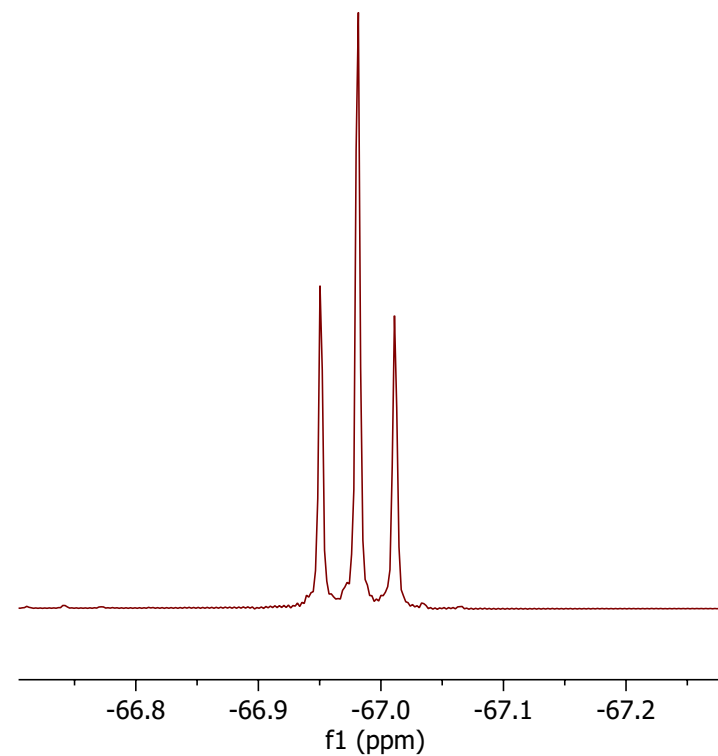

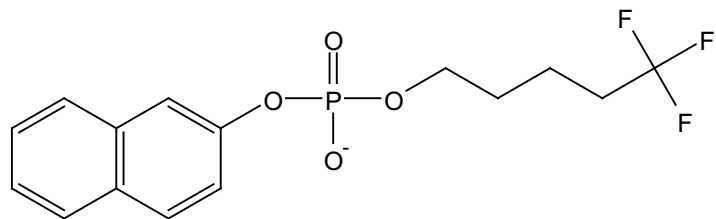

TBA salt

**49**

A (s)  
-5.44



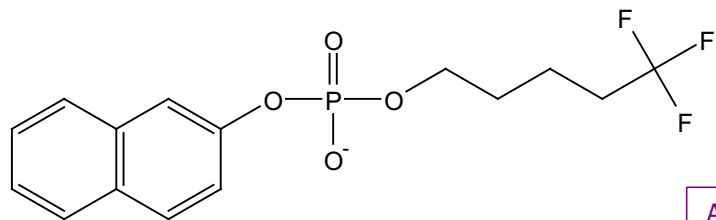

TBA salt

**49**

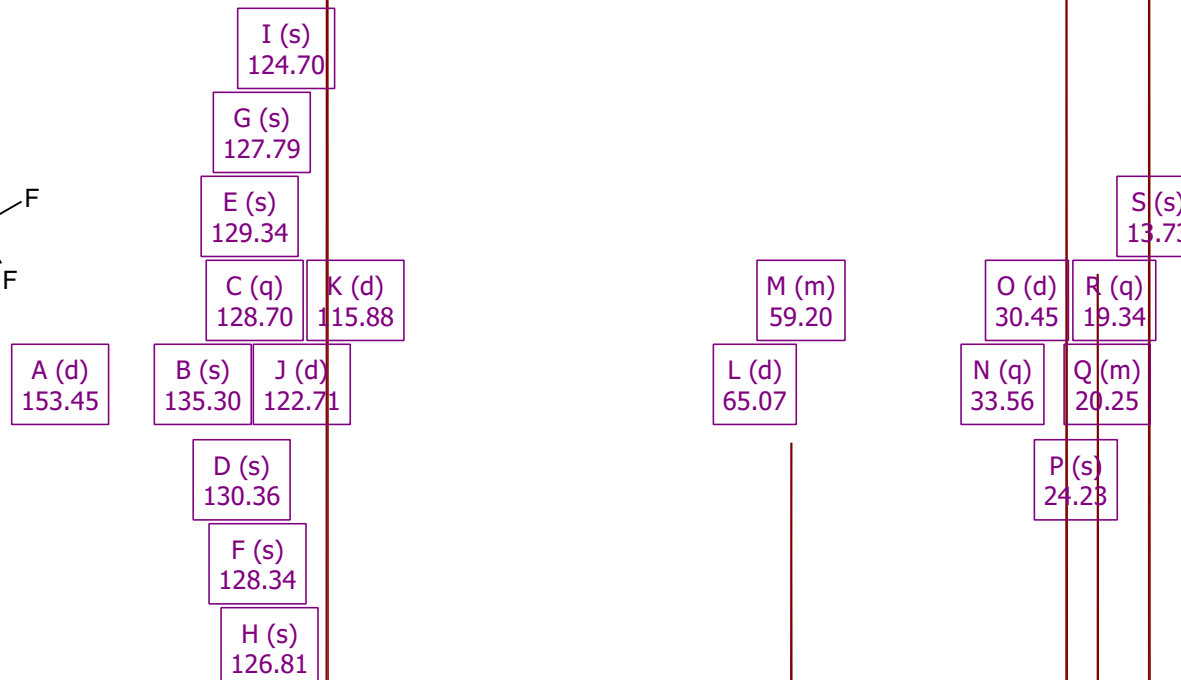

240 230 220 210 200 190 180 170 160 150 140 130 120 110 100 90 80 70 60 50 40 30 20 10 0 -10 -20  
f1 (ppm)

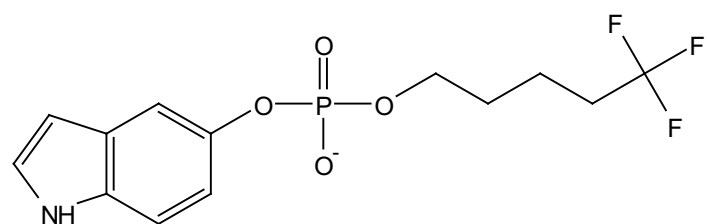

TBA salt

**50**

A (s)  
9.78

B (td)  
7.35

D (ddd)  
7.18

C (dd)  
7.25

E (dddd)  
6.97

F (ddd)  
6.33

G (m)  
3.82

H (m)  
3.08

I (m)  
2.13

J (m)  
1.59

K (m)  
1.35

L (t)  
0.96

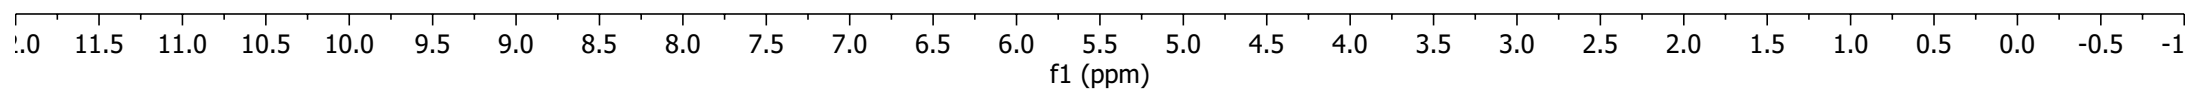

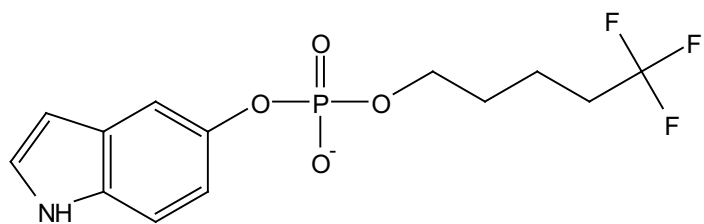

TBA salt

**50**

A (t)  
-66.96

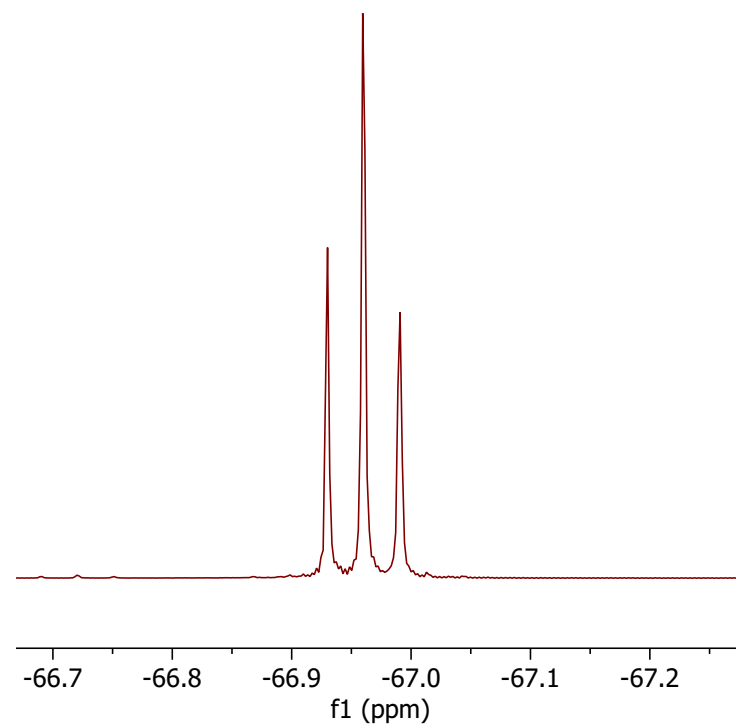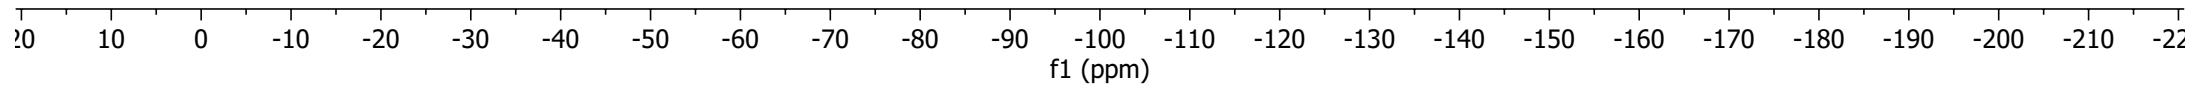



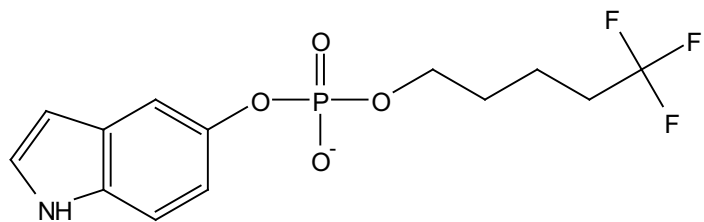

TBA salt

**50**

A (s)  
-4.70

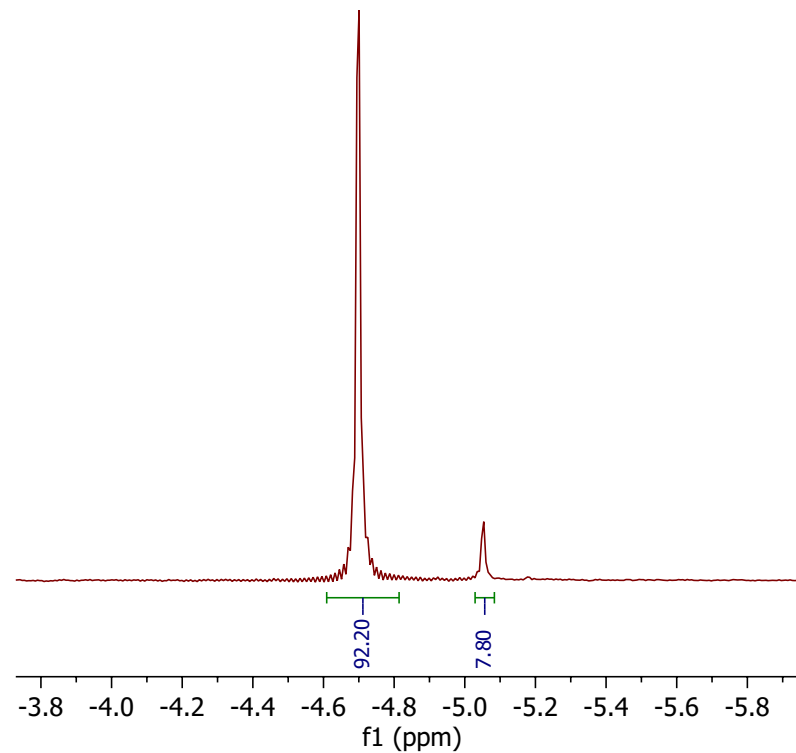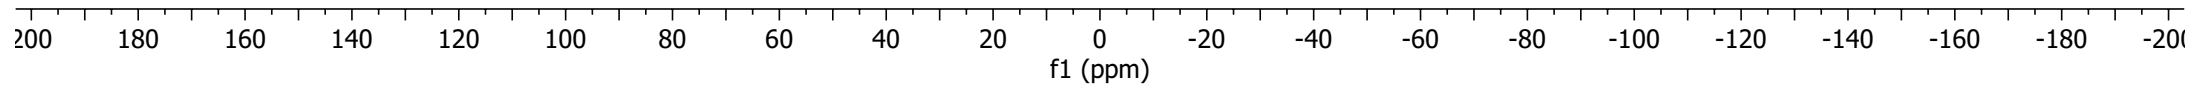



TBA salt

**50**

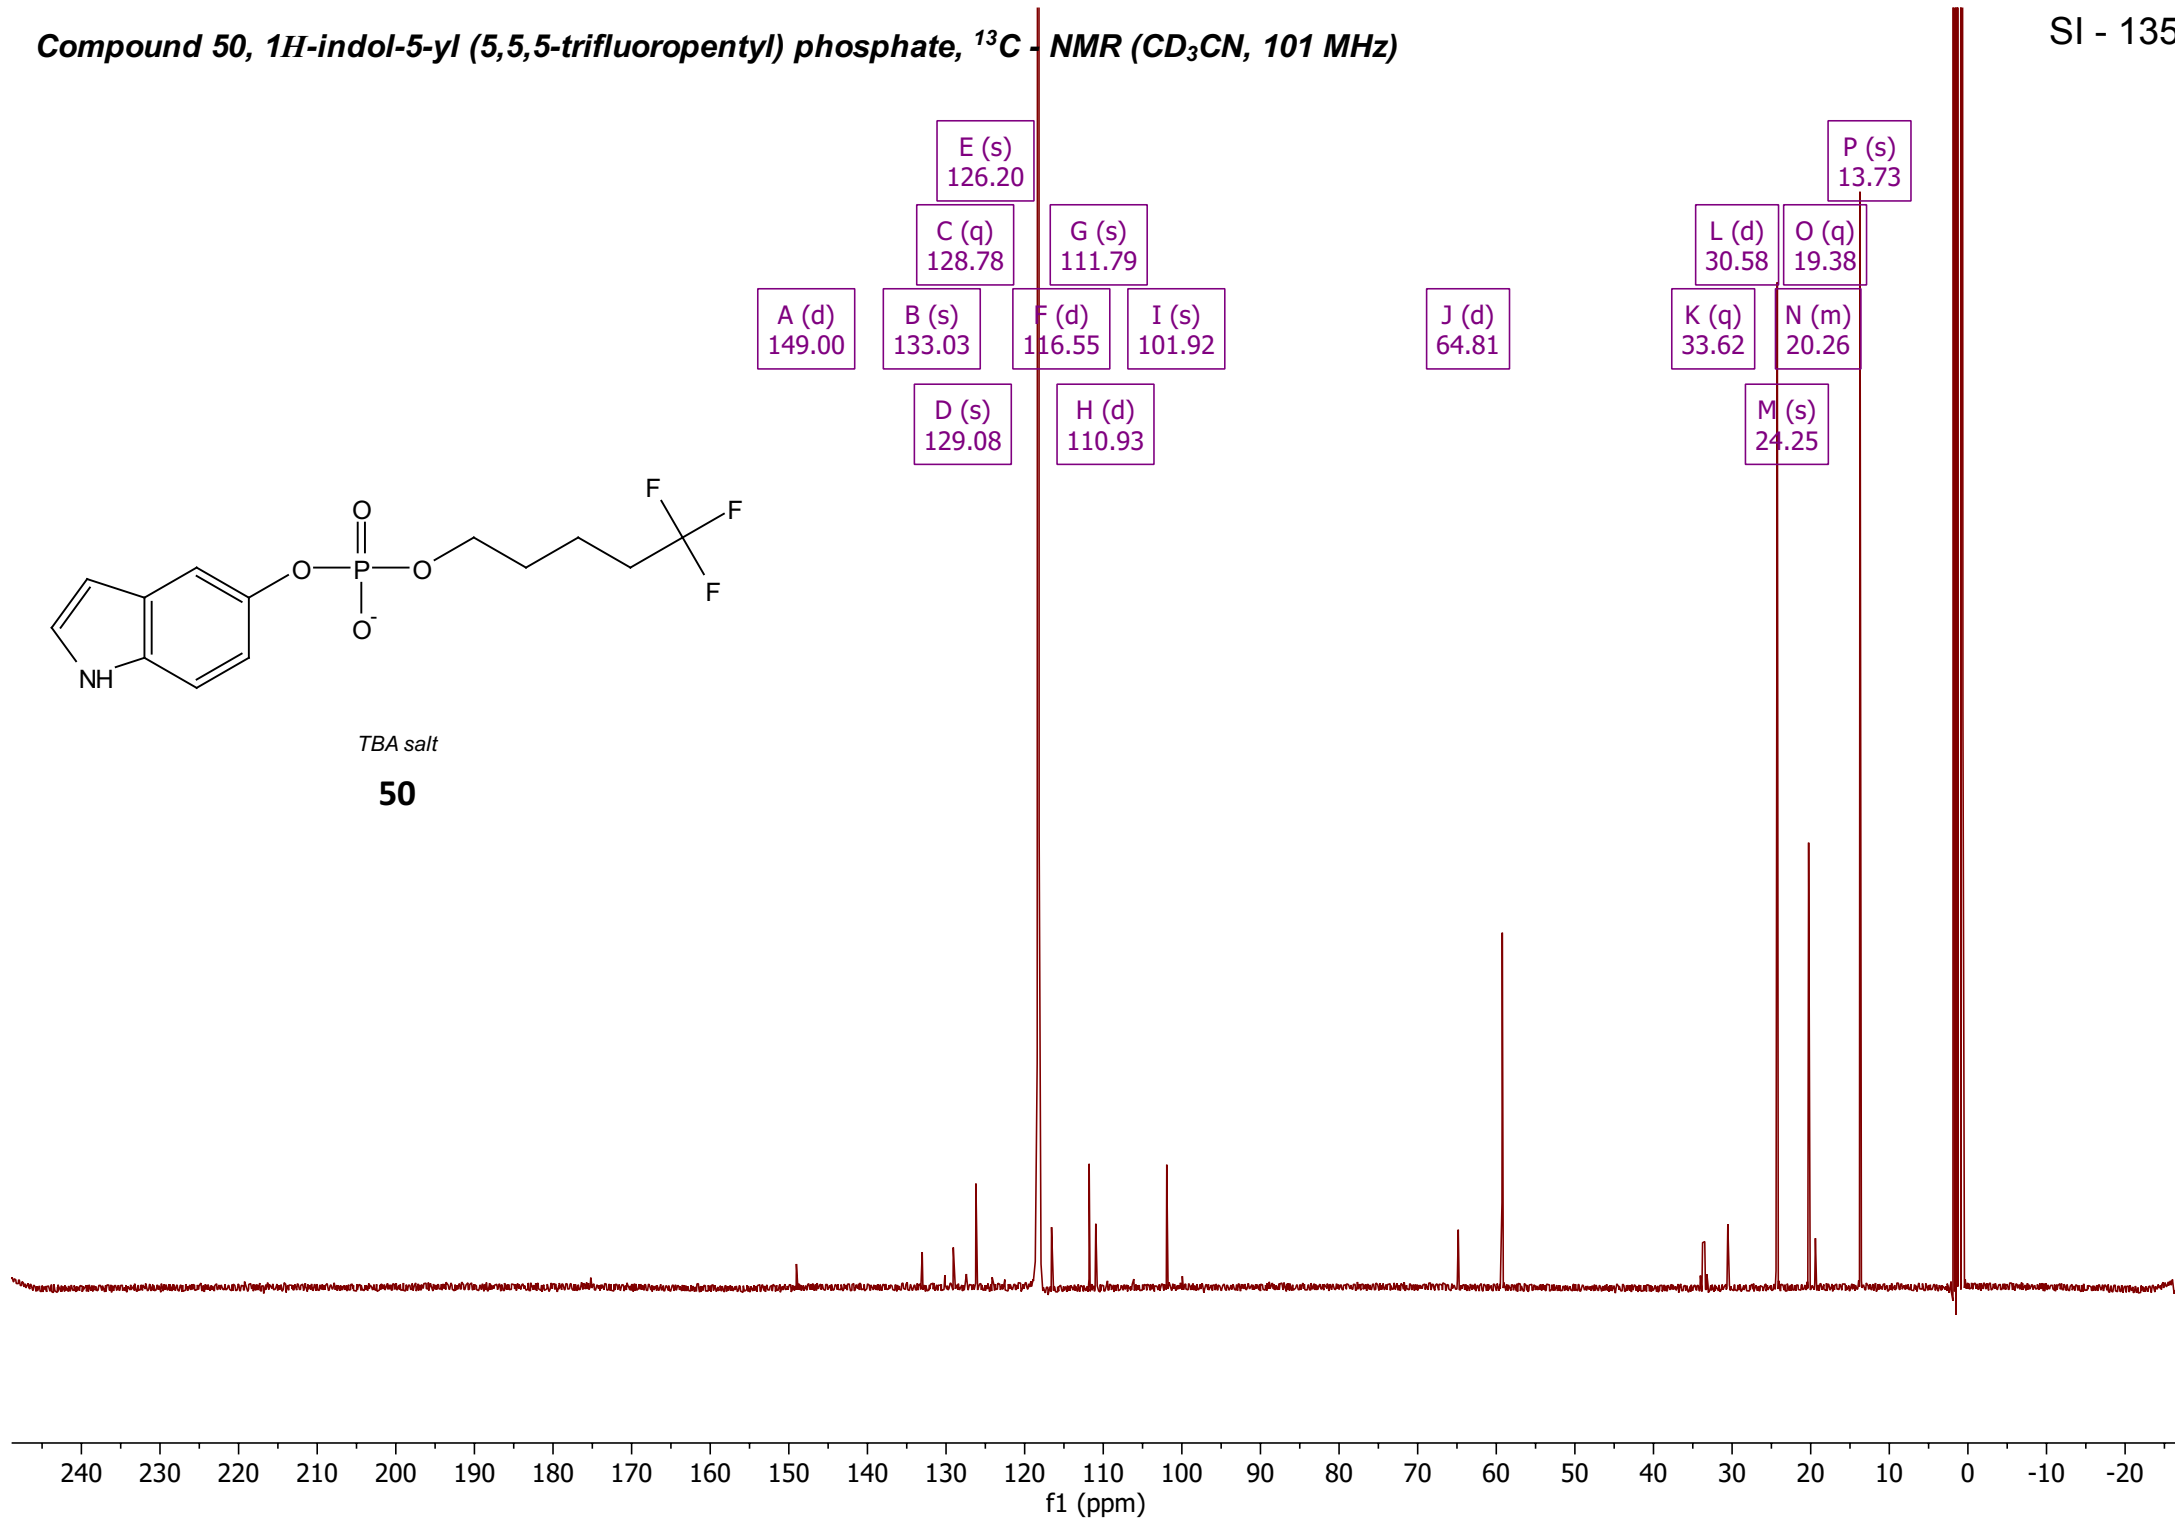

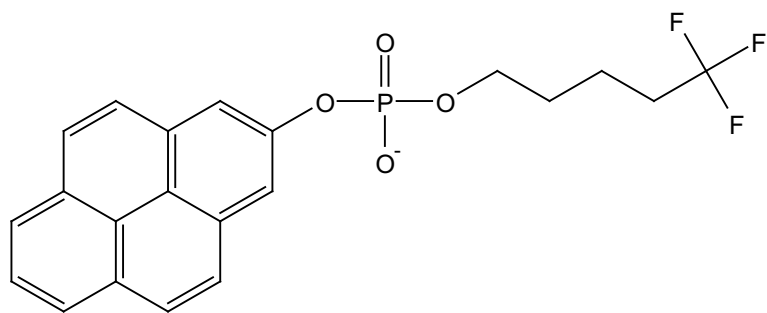

TBA salt

**51**

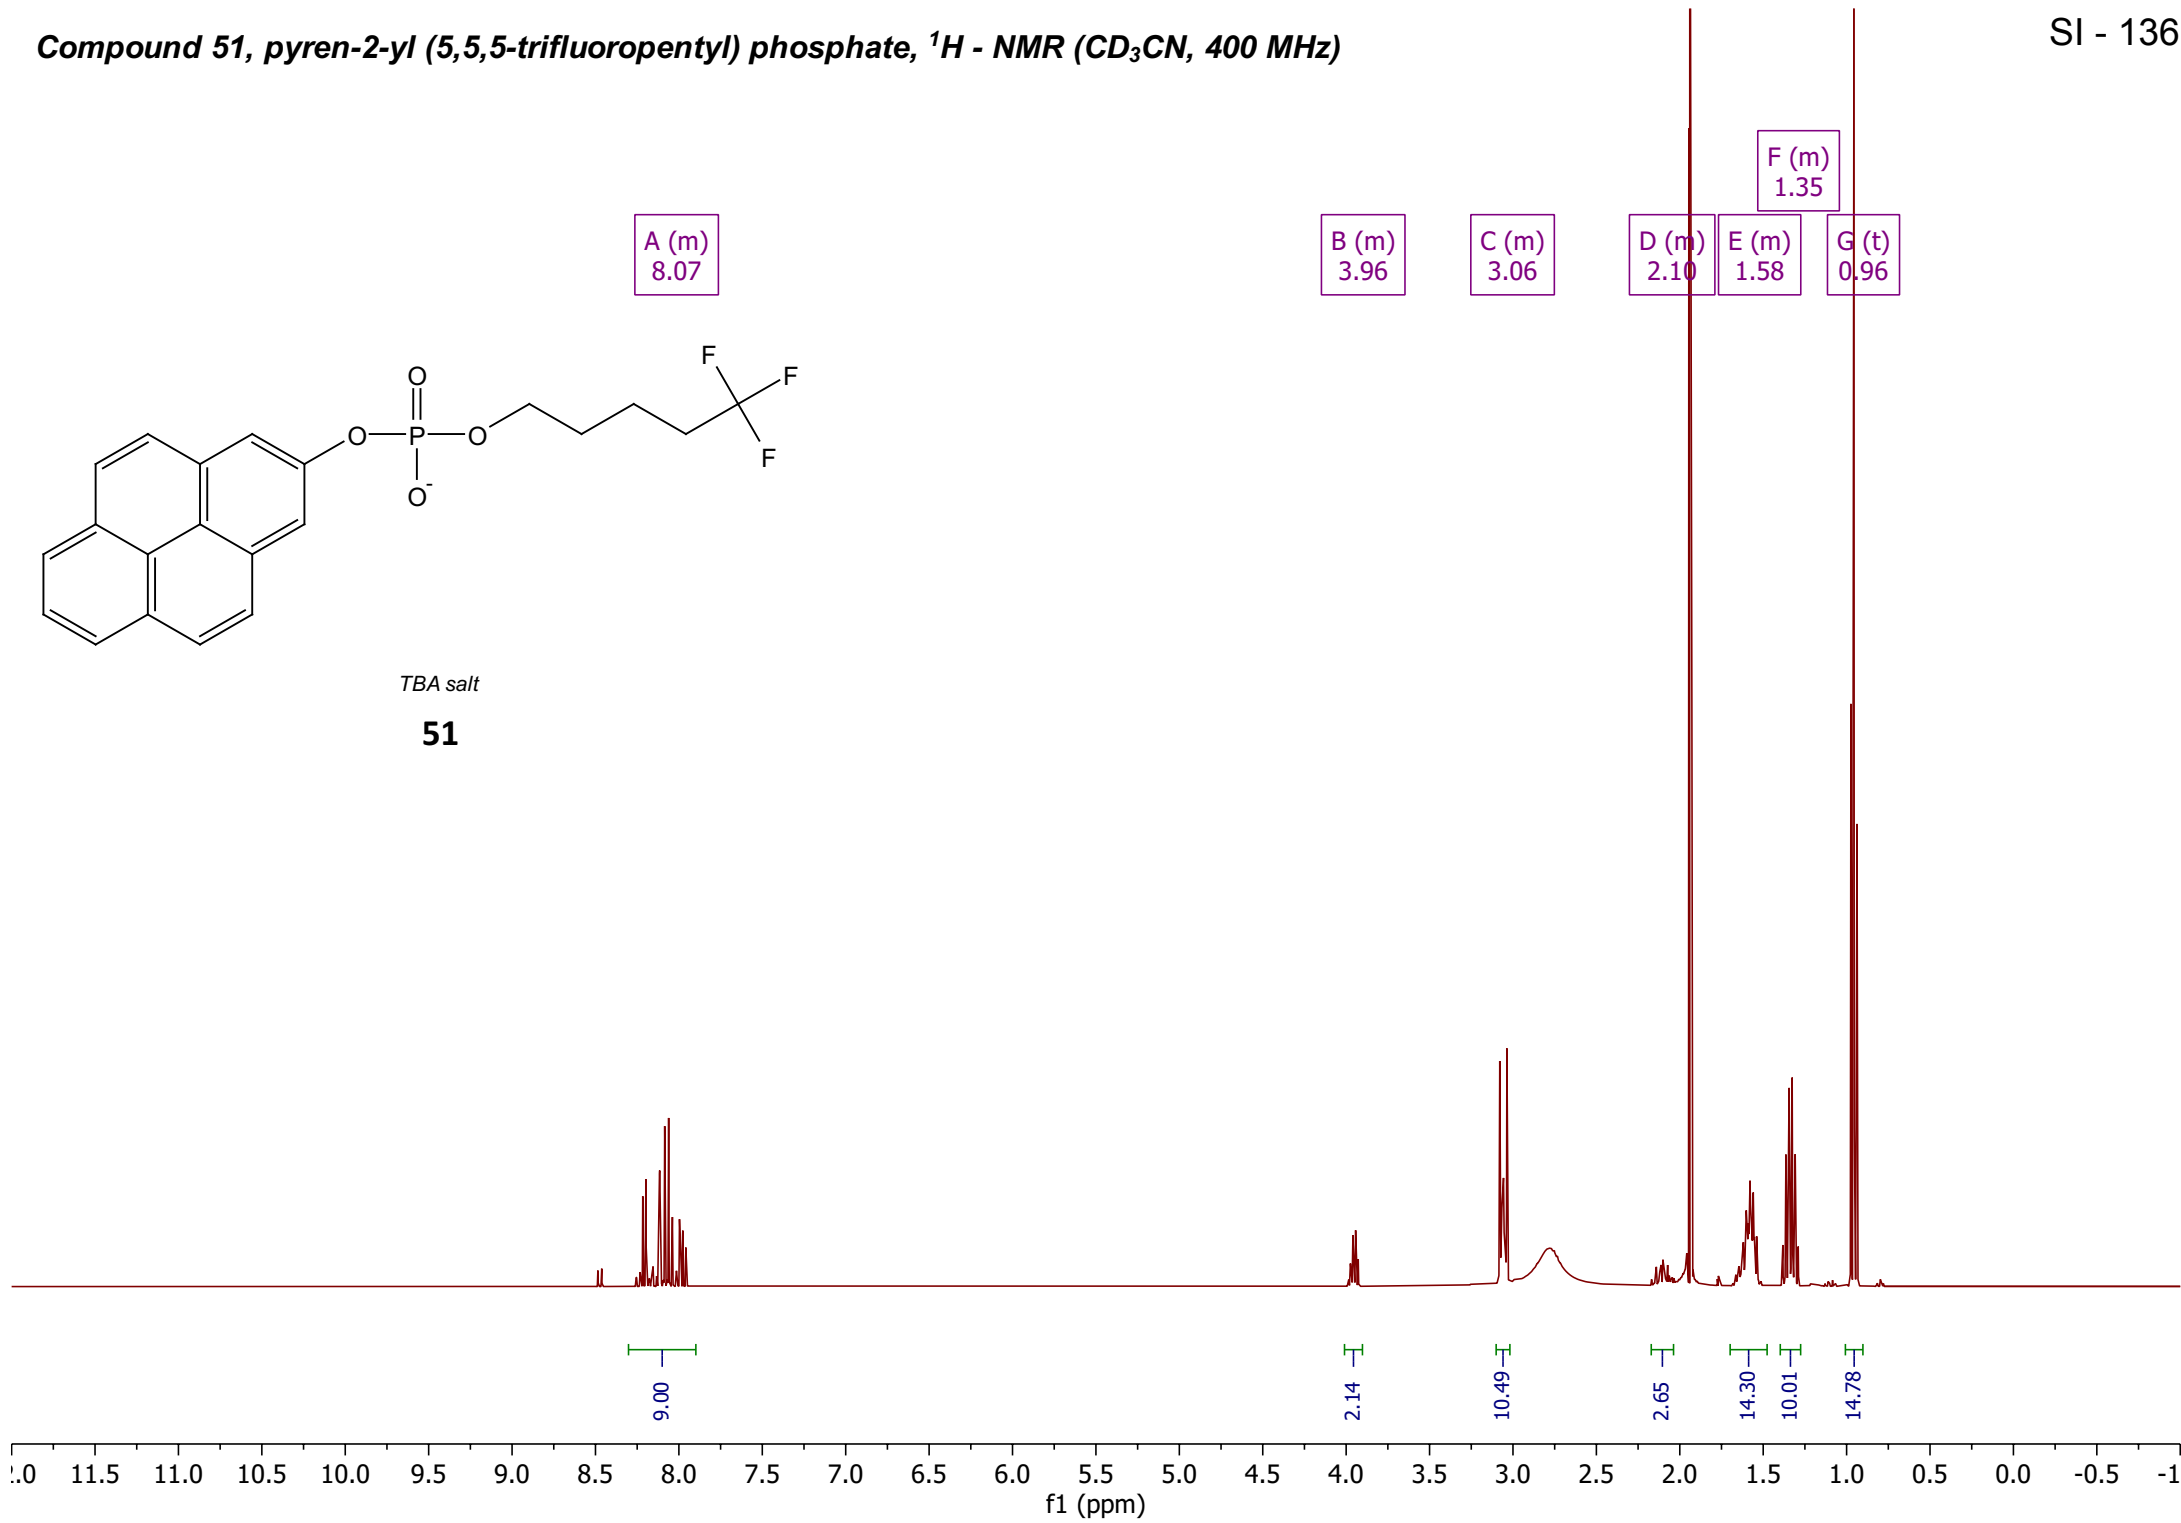

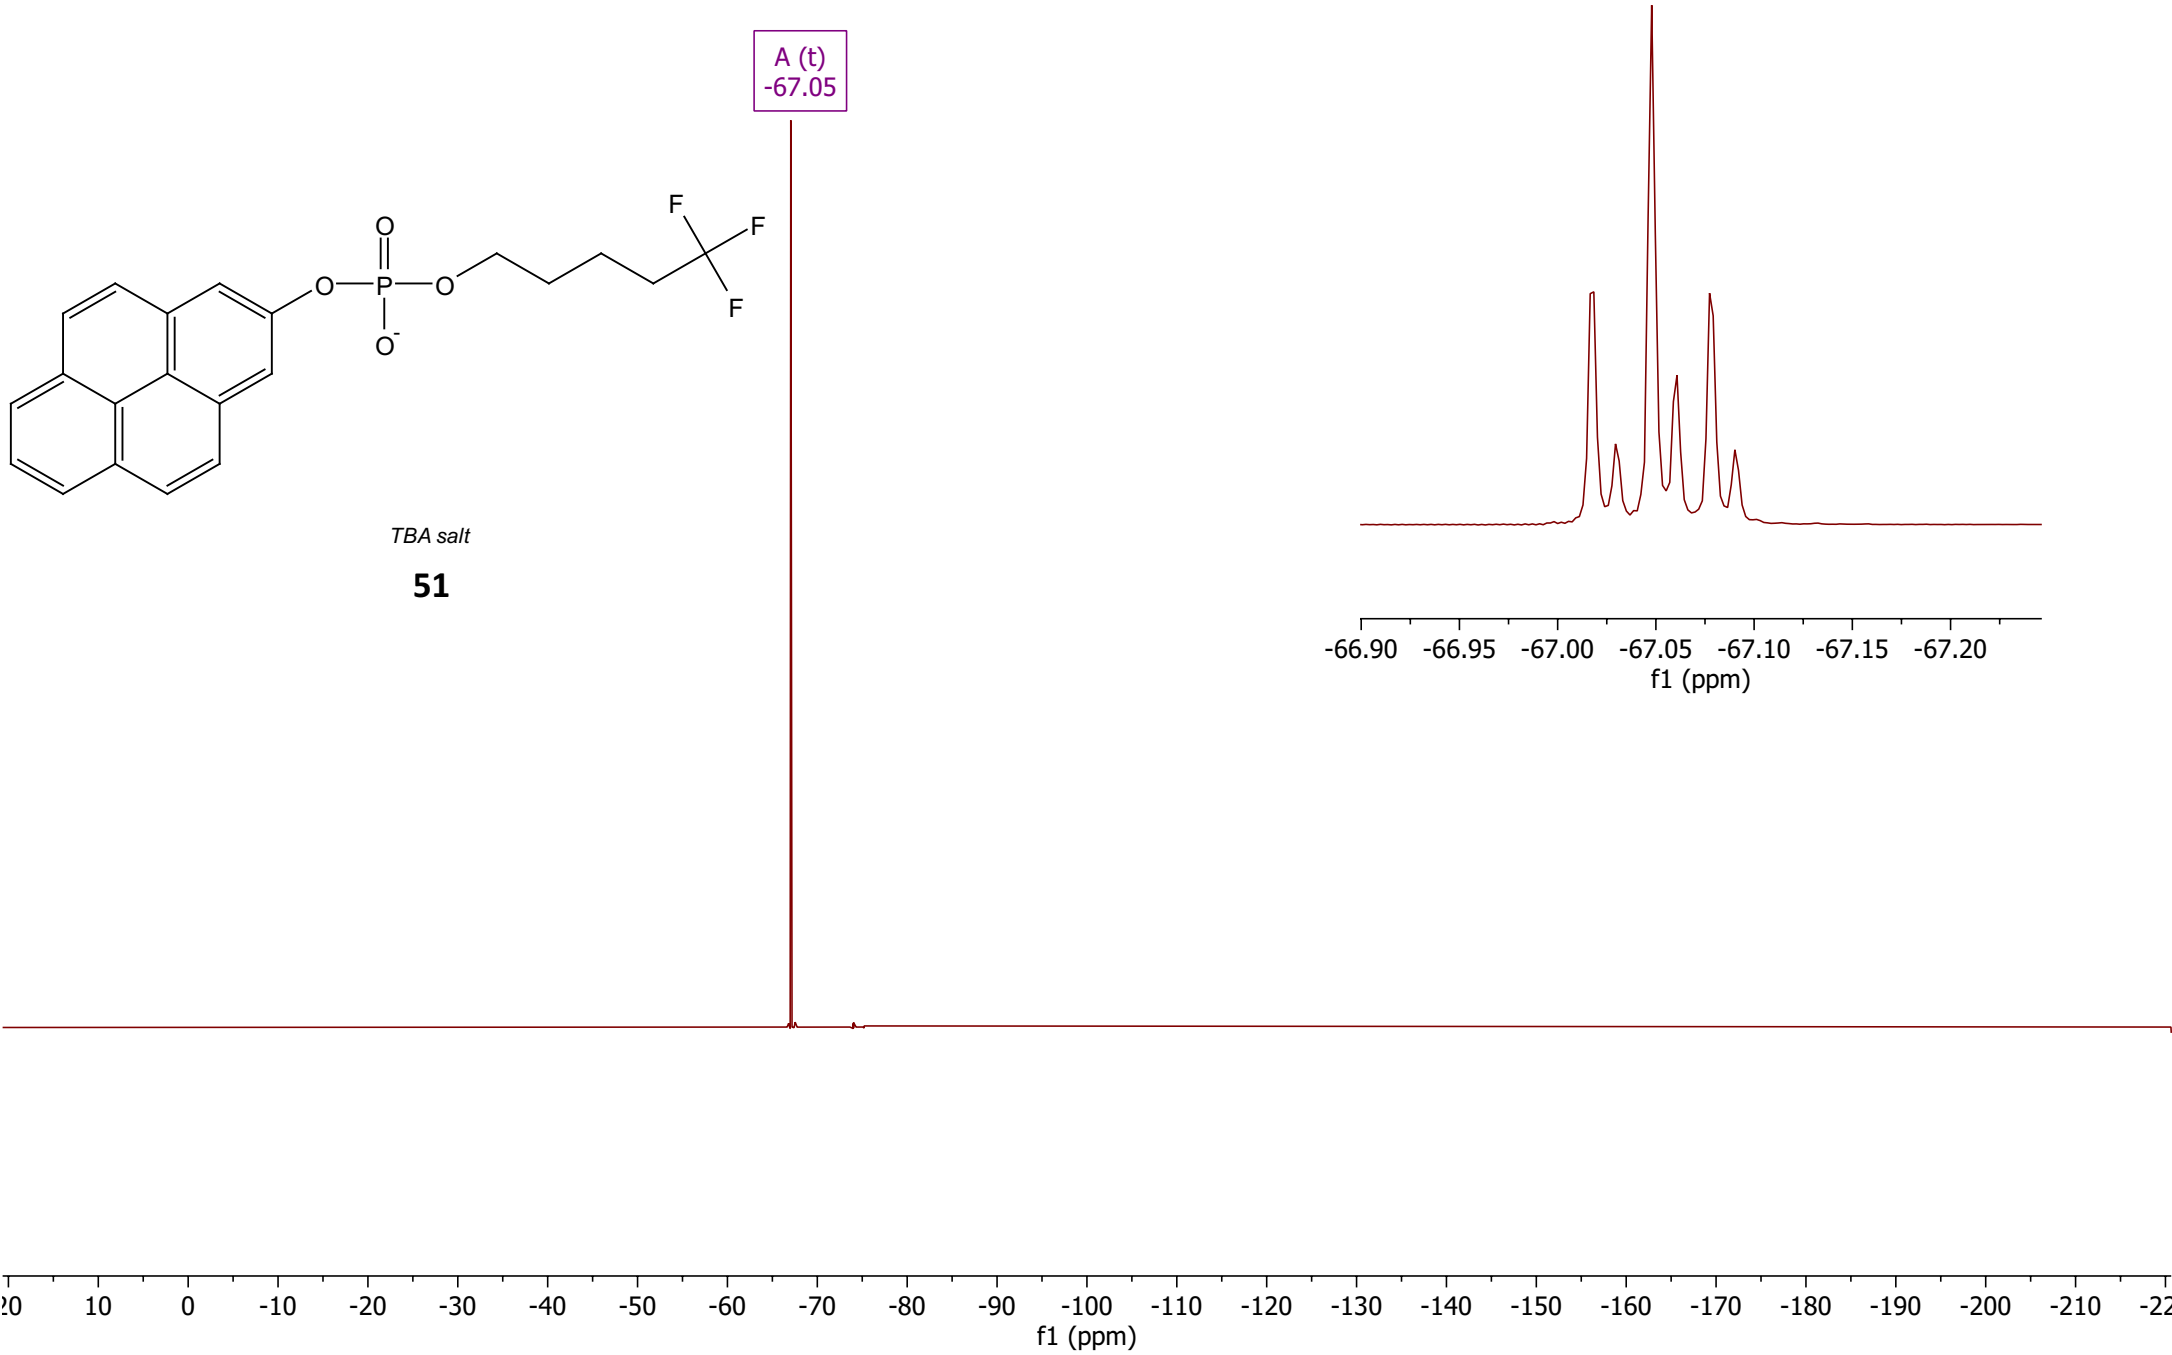

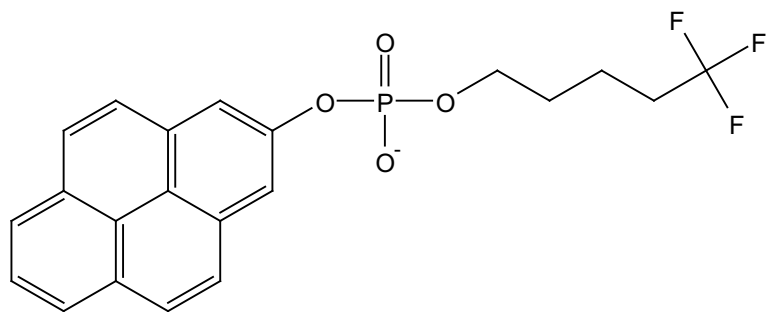

TBA salt

**51**

A (s)  
-5.93

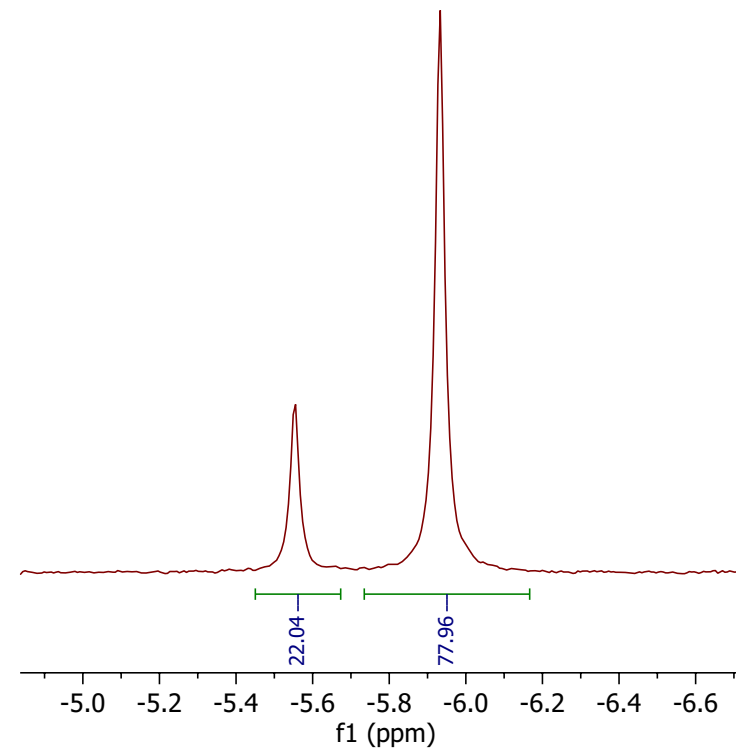

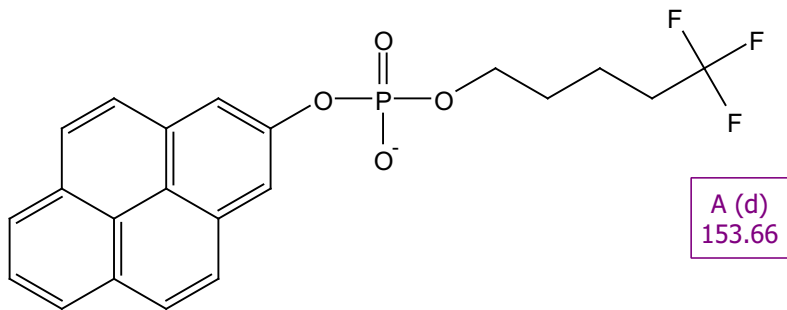

TBA salt

**51**

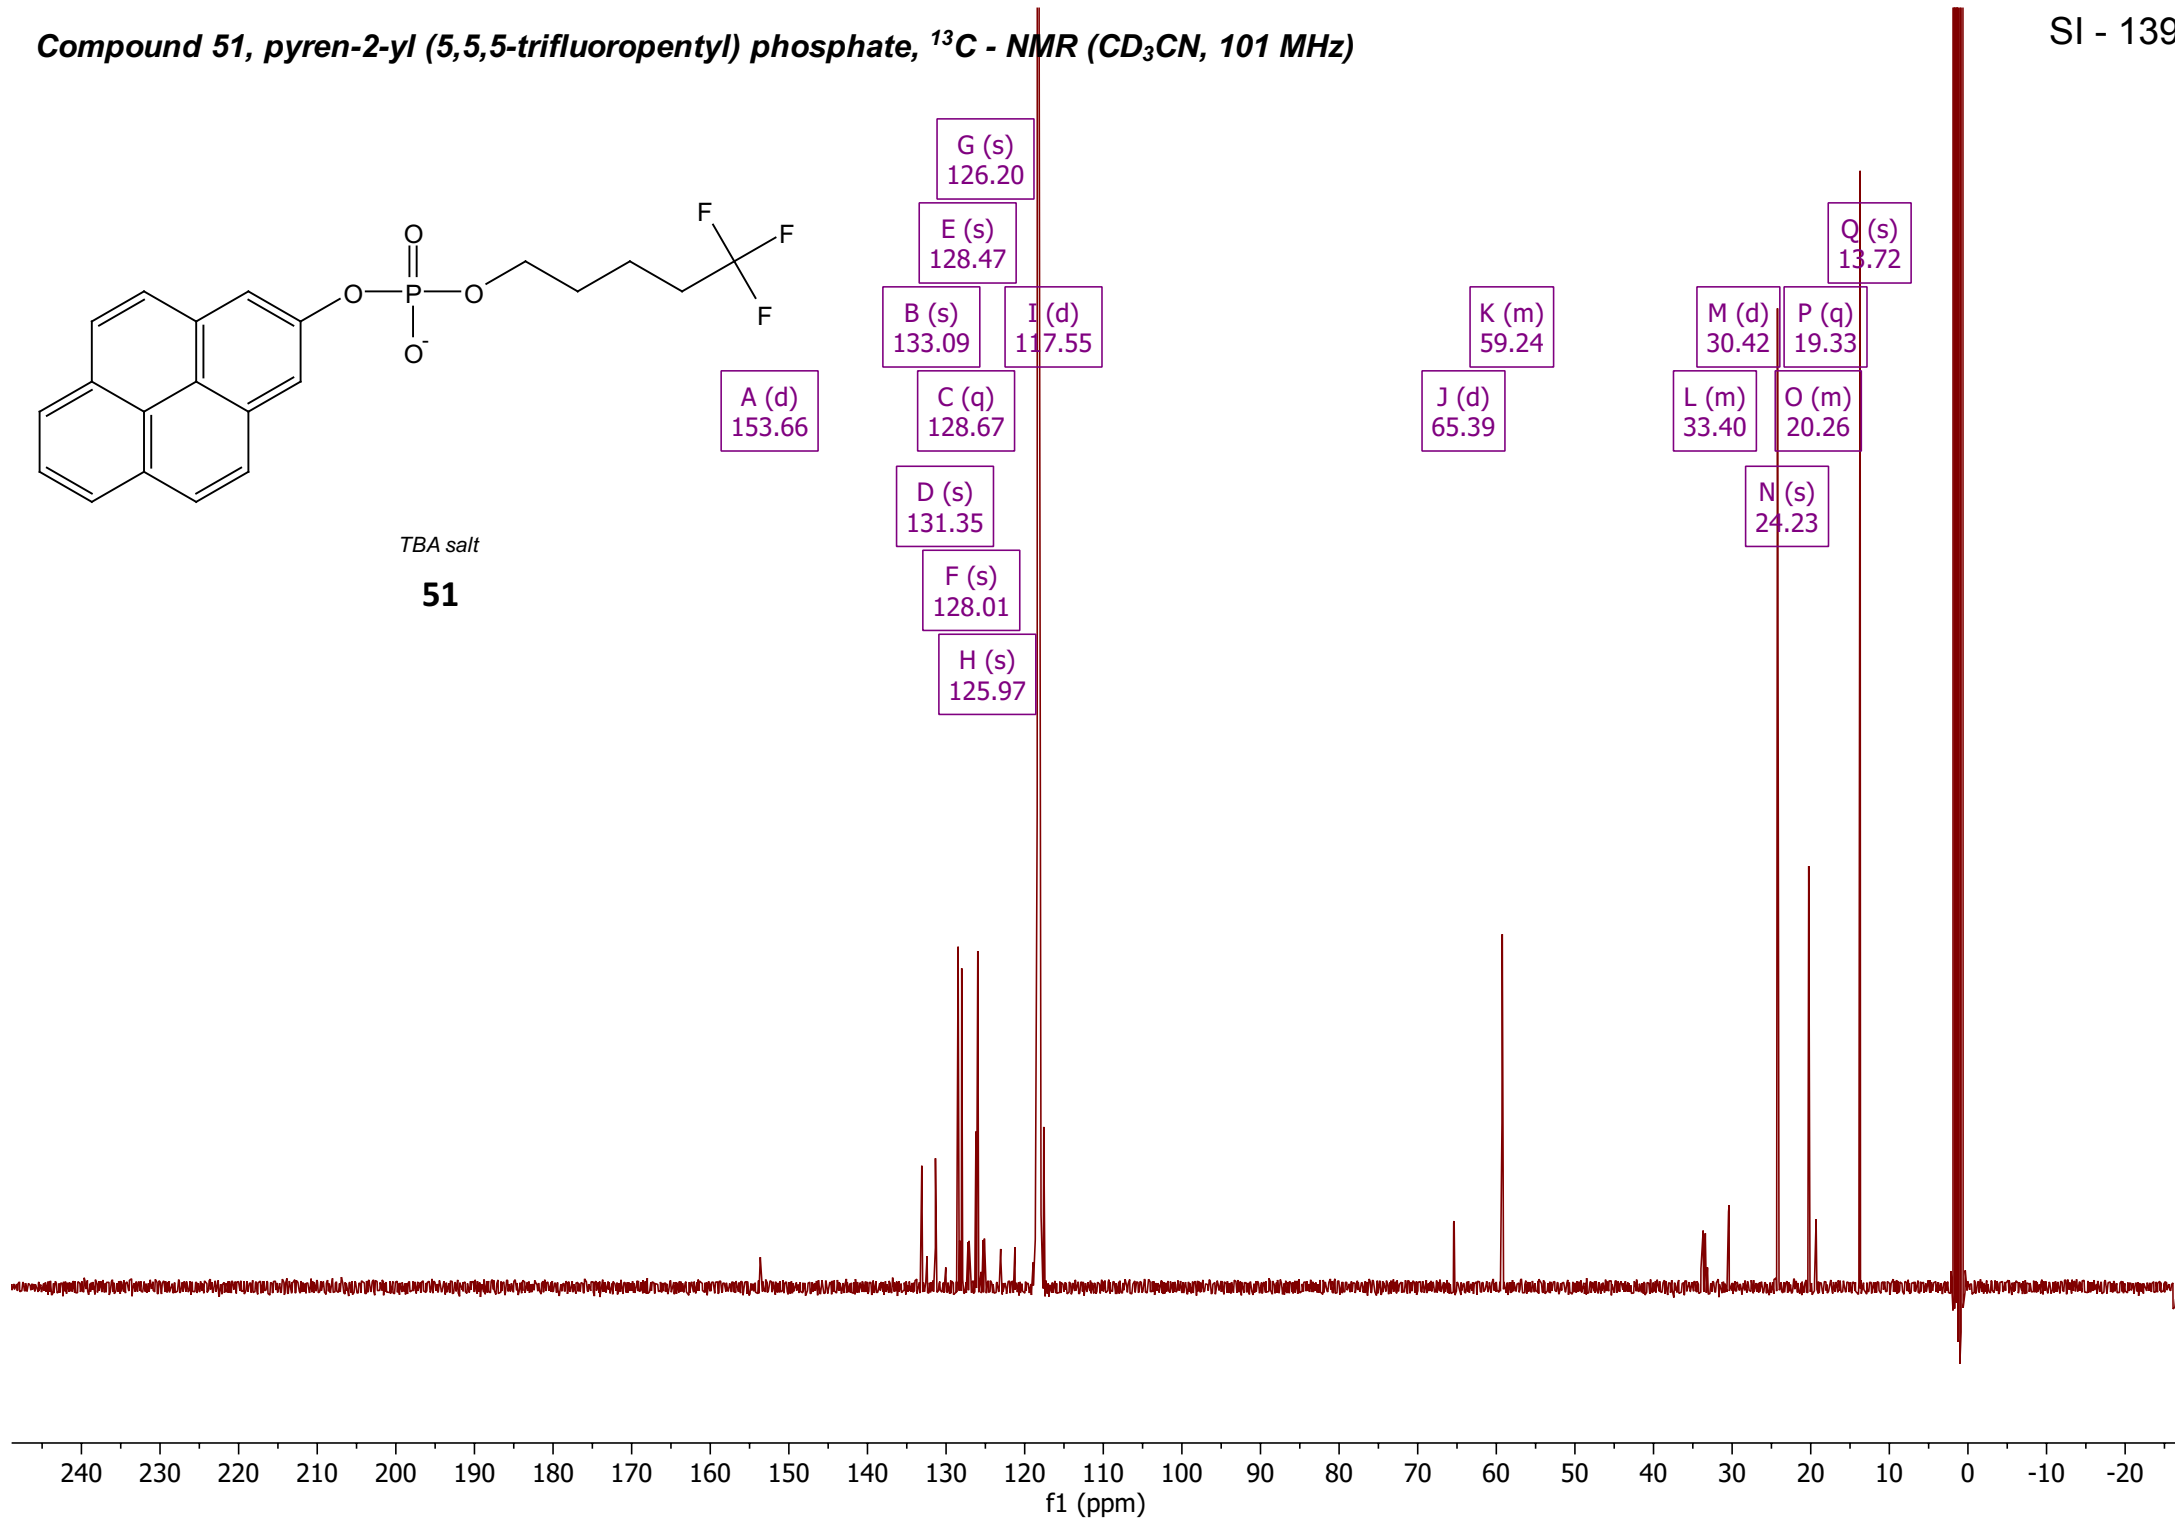

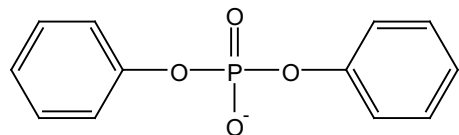

TBA/TEA - salt

**52**

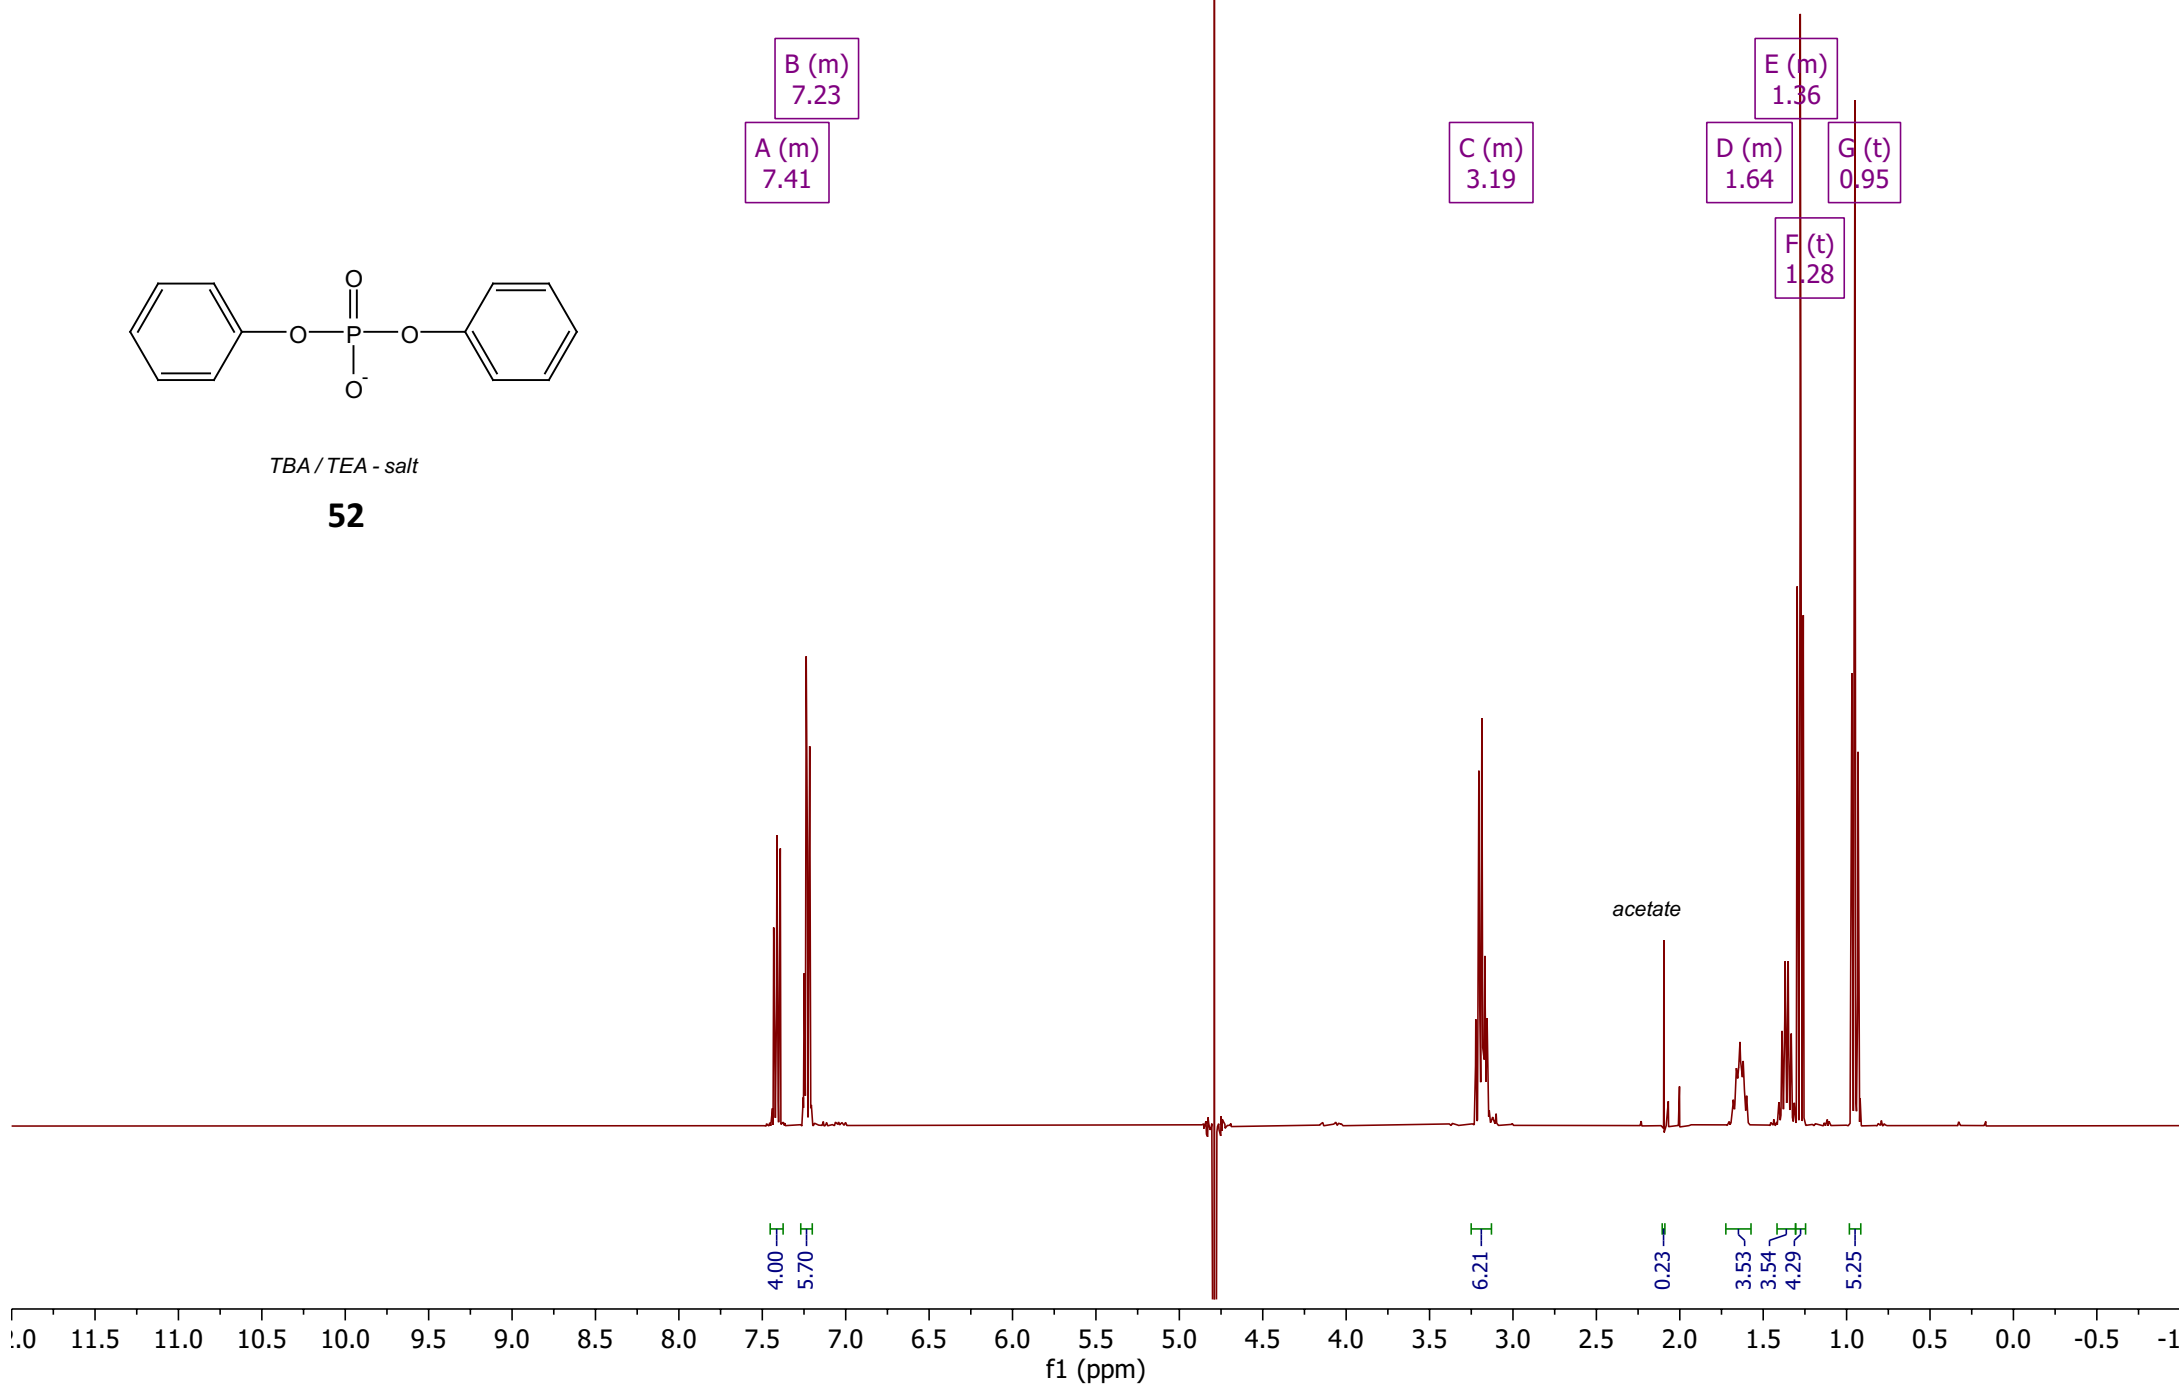

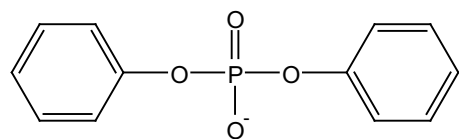

TBA/TEA - salt

**52**

A (s)  
-8.85





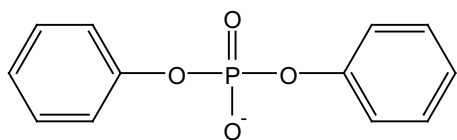

TBA / TEA - salt

**52**

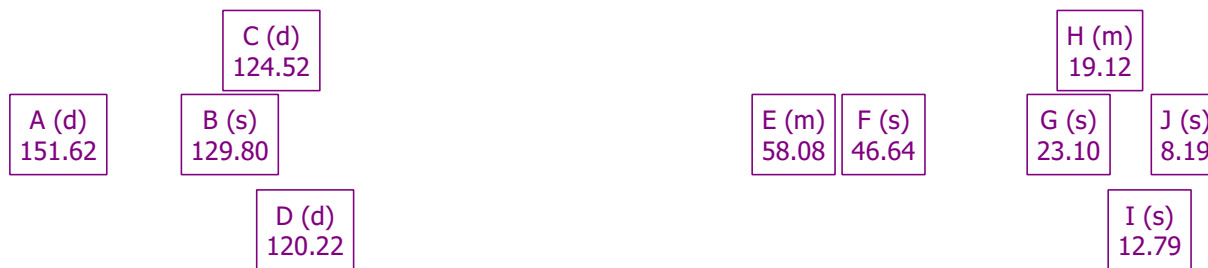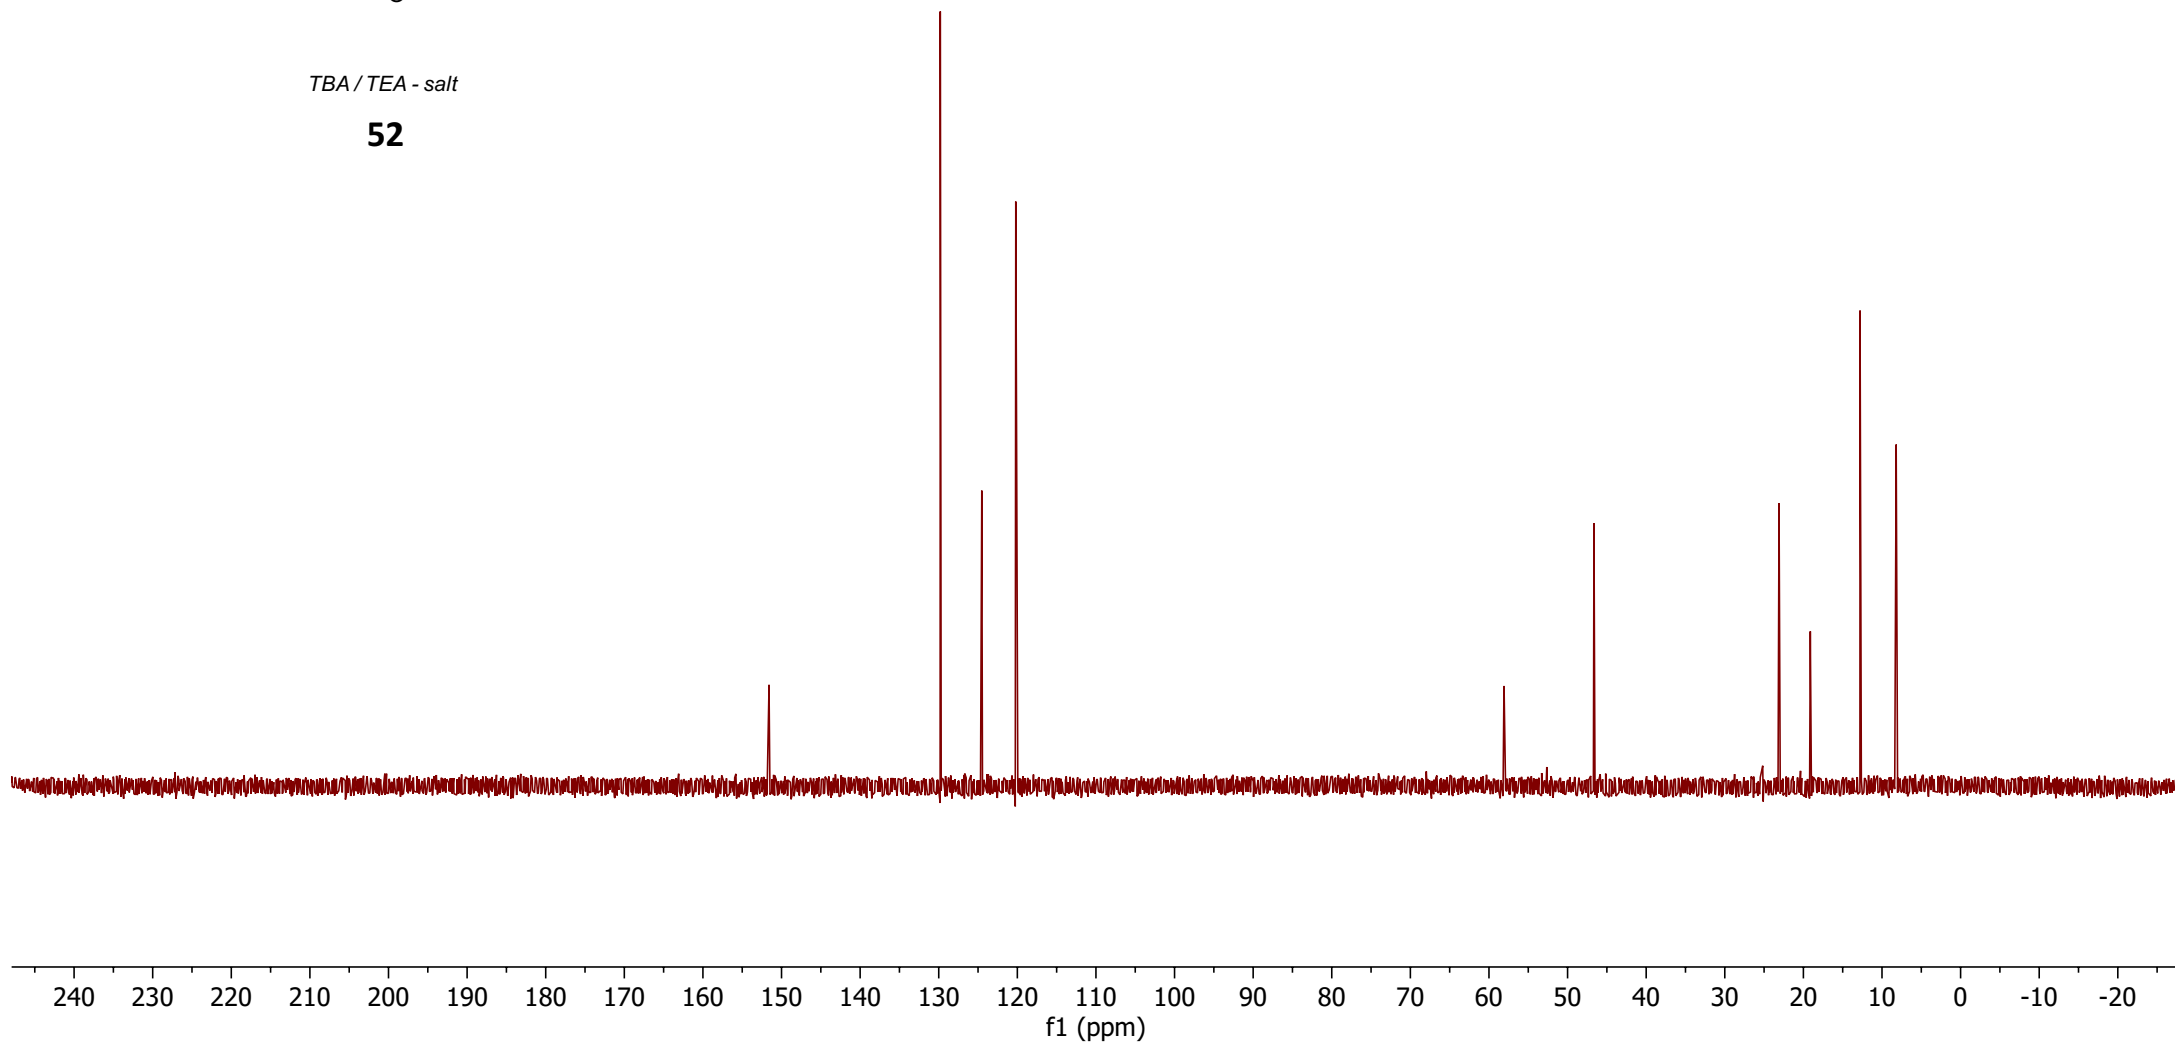

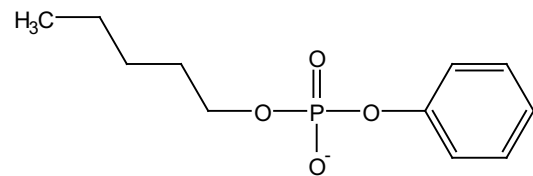

TBA - salt

**53**

H (m) 7.20  
G (m) 7.27  
I (m) 7.03  
B (q) 3.87  
C (m) 3.09  
D (m) 1.58  
E (m) 1.31  
A (m) 0.87  
F (t) 0.96

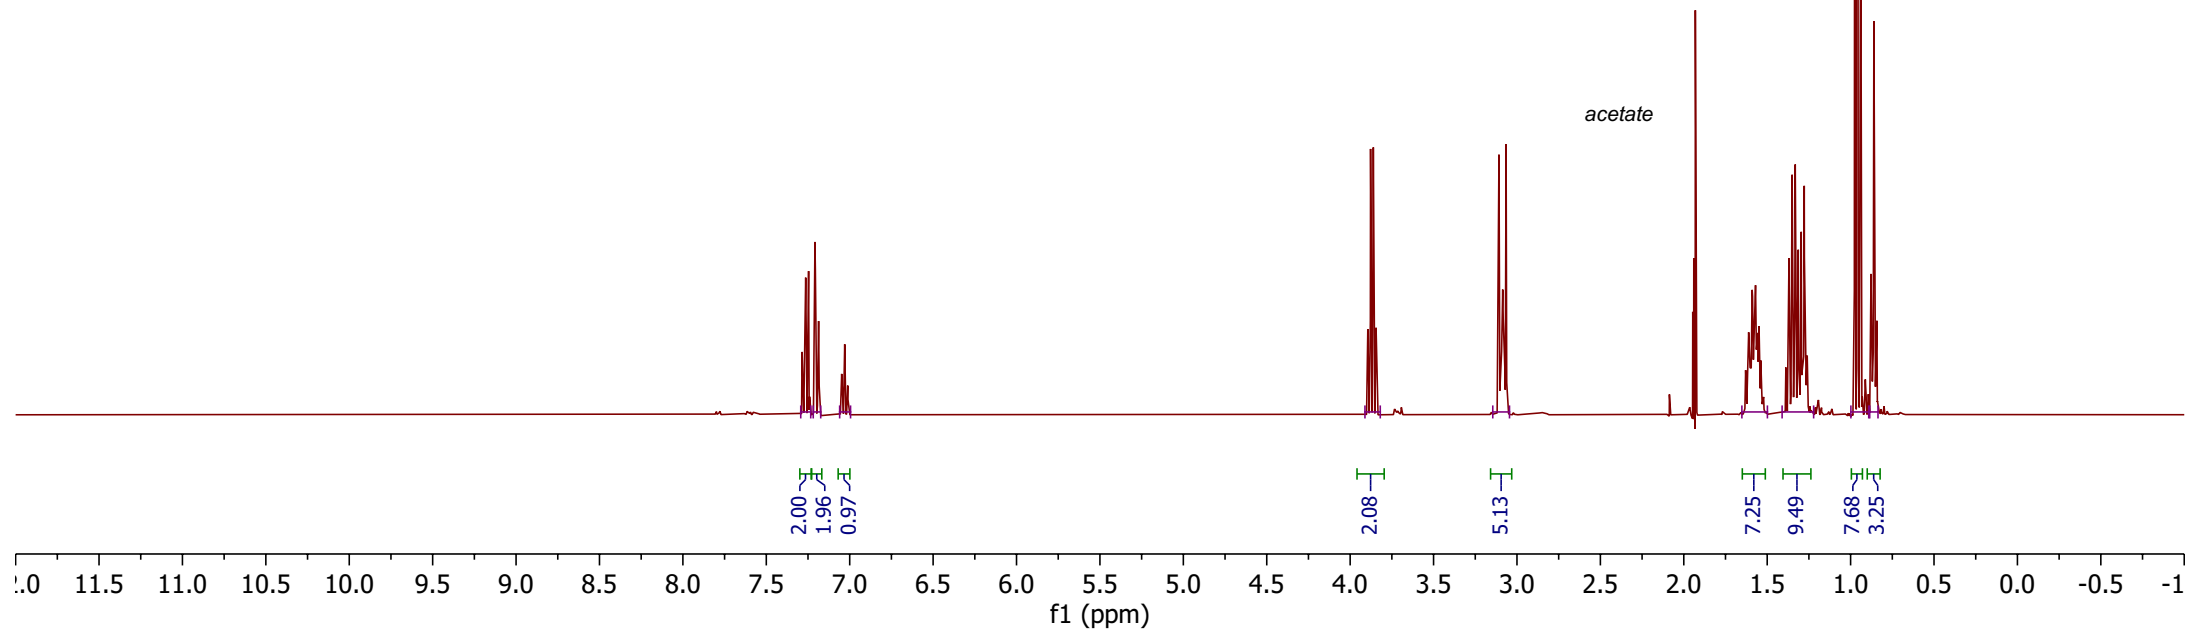

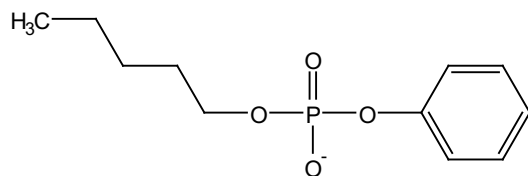

TBA - salt

**53**

A (s)  
-6.80

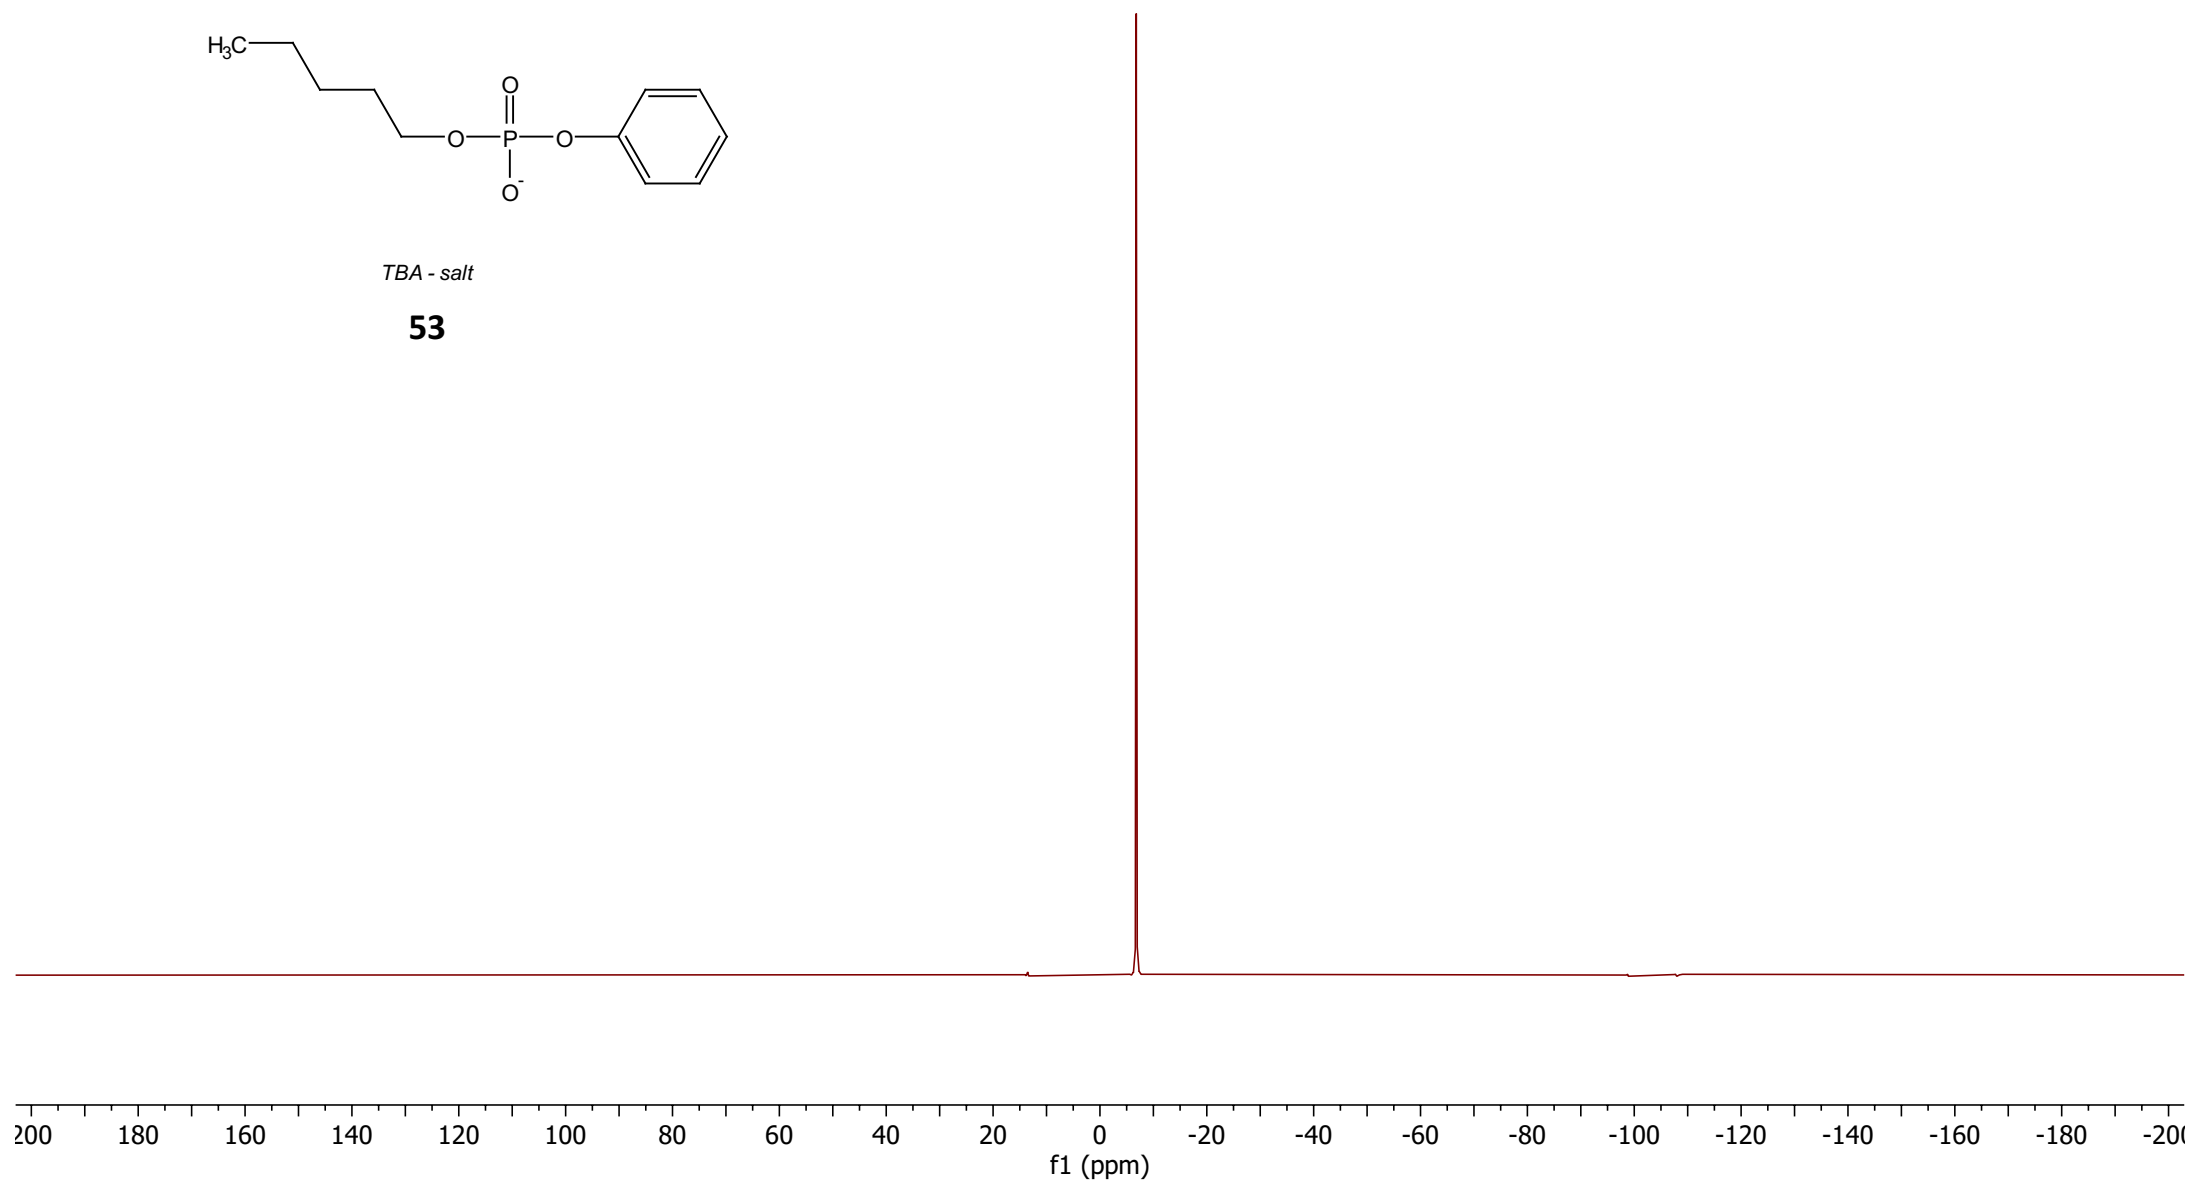

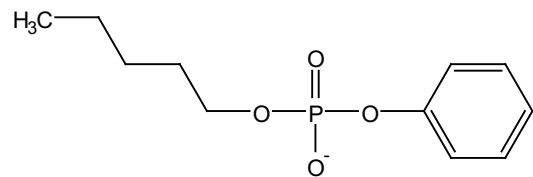

TBA - salt

**53**

A (d)  
154.47

B (s)  
130.02

C (s)  
123.61

D (d)  
121.15

E (d)  
66.66

F (m)  
59.28

G (d)  
31.15

J (s)  
23.09

H (s)  
28.74

I (s)  
24.32

K (m)  
20.33

M (s)  
13.82

L (s)  
14.34

acetate

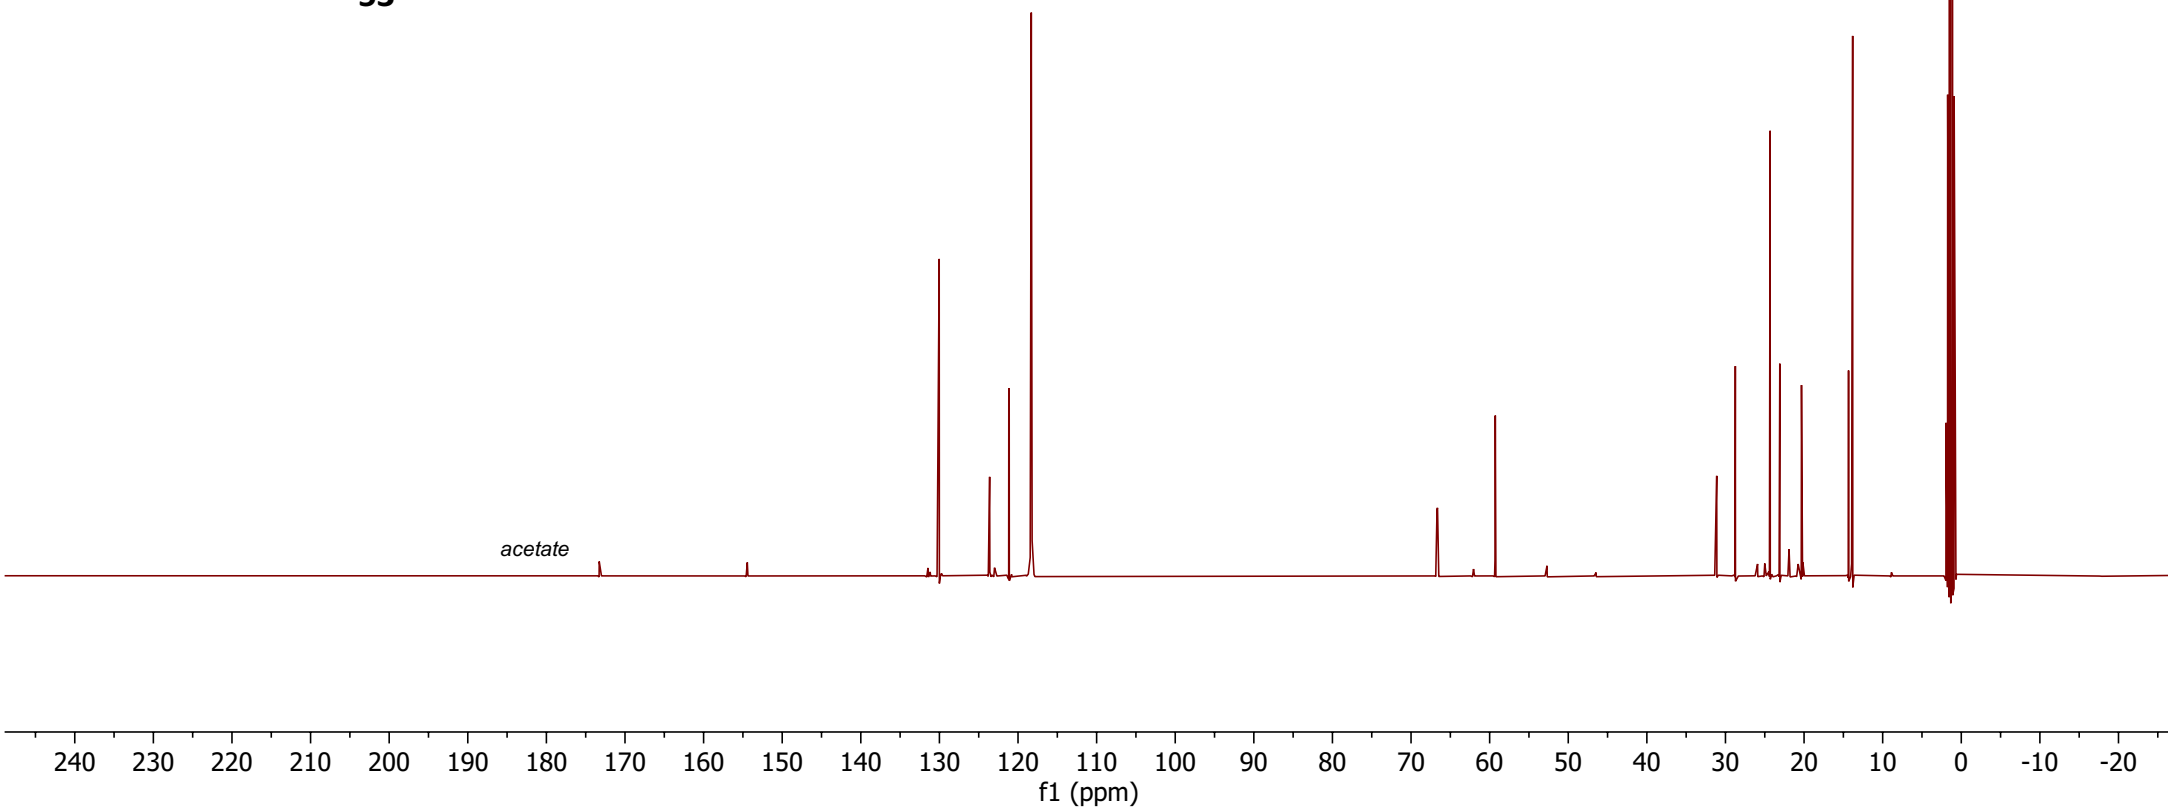

Compound 54, Phenylphenylphosphonate, <sup>1</sup>H - NMR (D<sub>2</sub>O, 400 MHz)

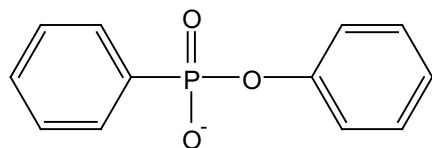

TBA - salt

**54**

D (m)  
7.30

B (m) 7.57    F (m) 7.02

A (m) 7.77    E (m) 7.15

C (m)  
7.51

G (m)  
3.18

H (m)  
1.64

I (h)  
1.36

J (t)  
0.95

acetate

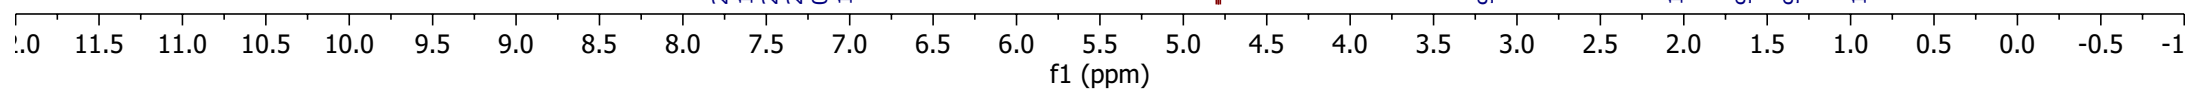

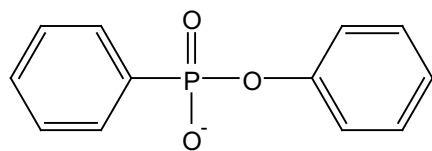

TBA - salt

**54**

A (s)  
12.99

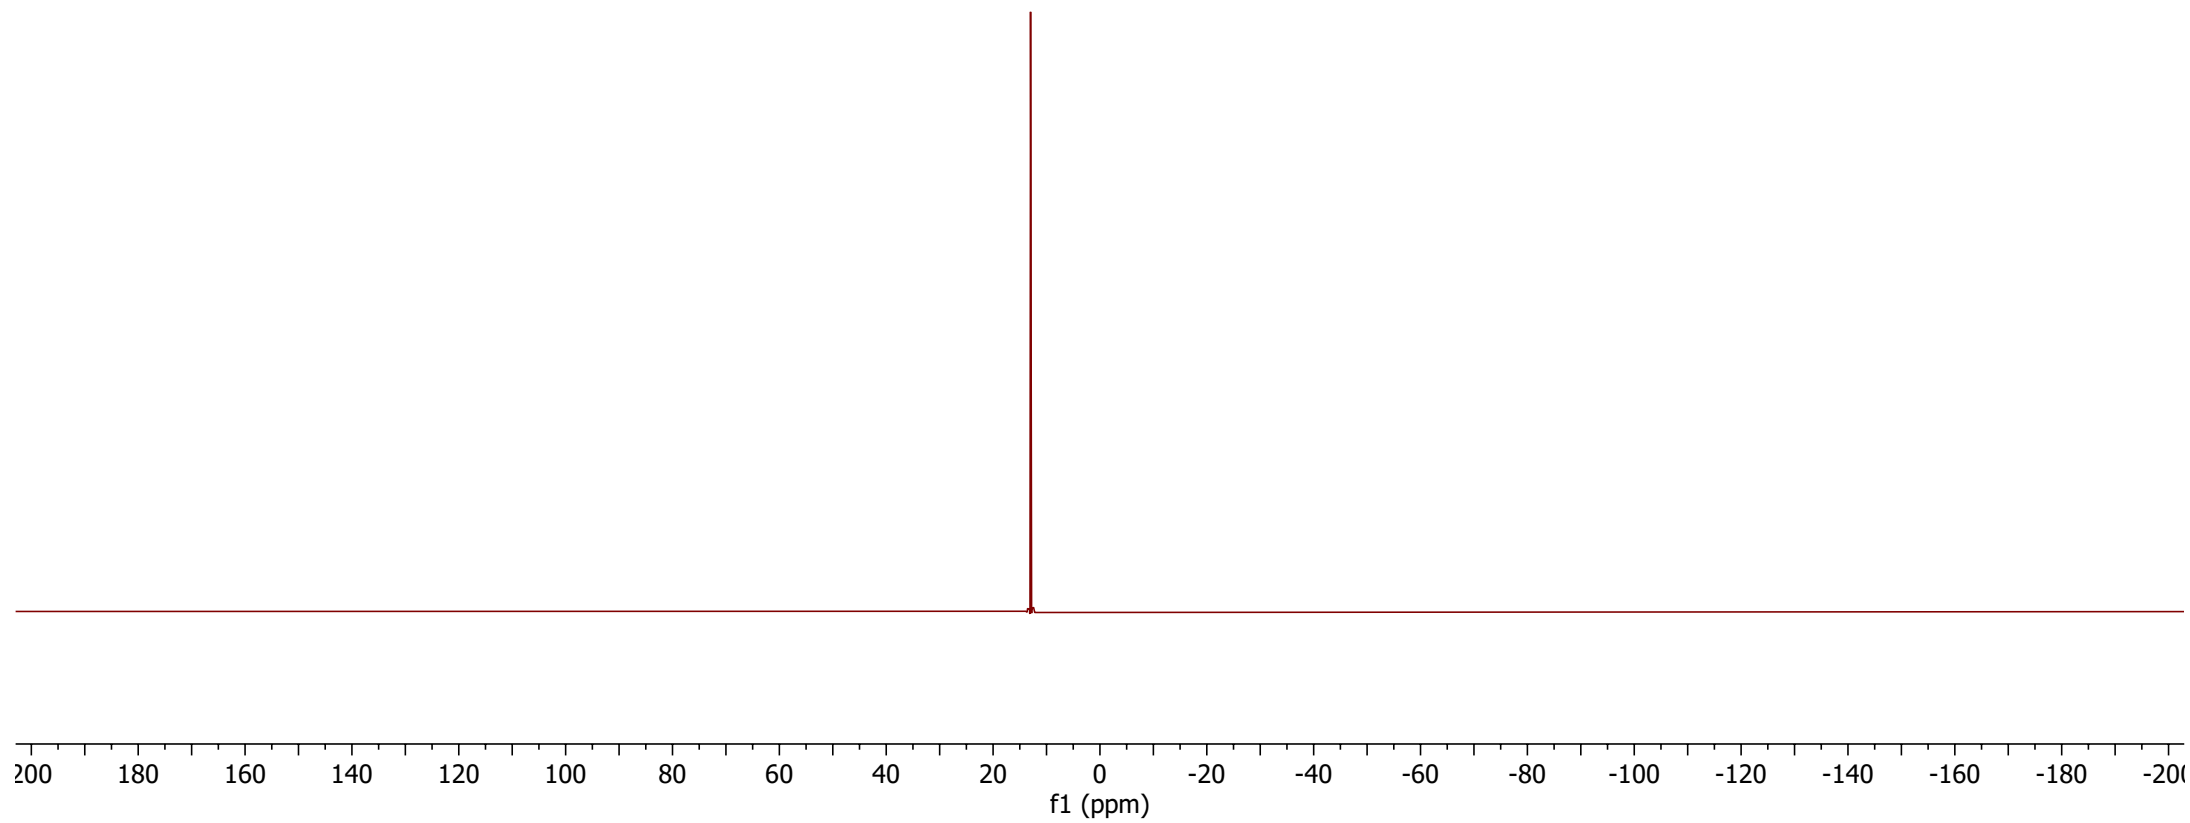

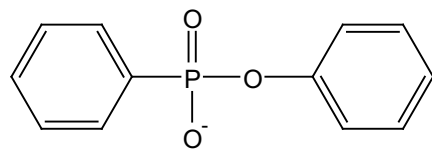

TBA - salt

**54**

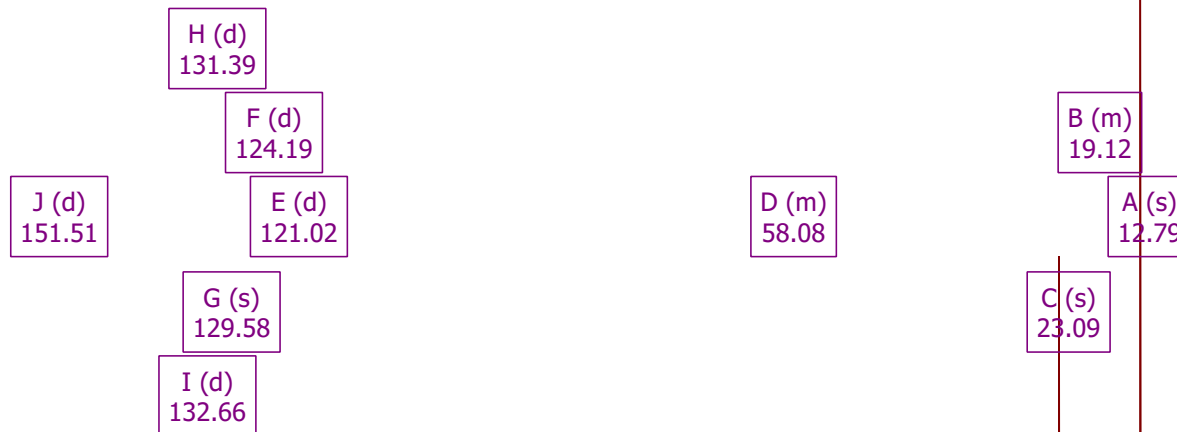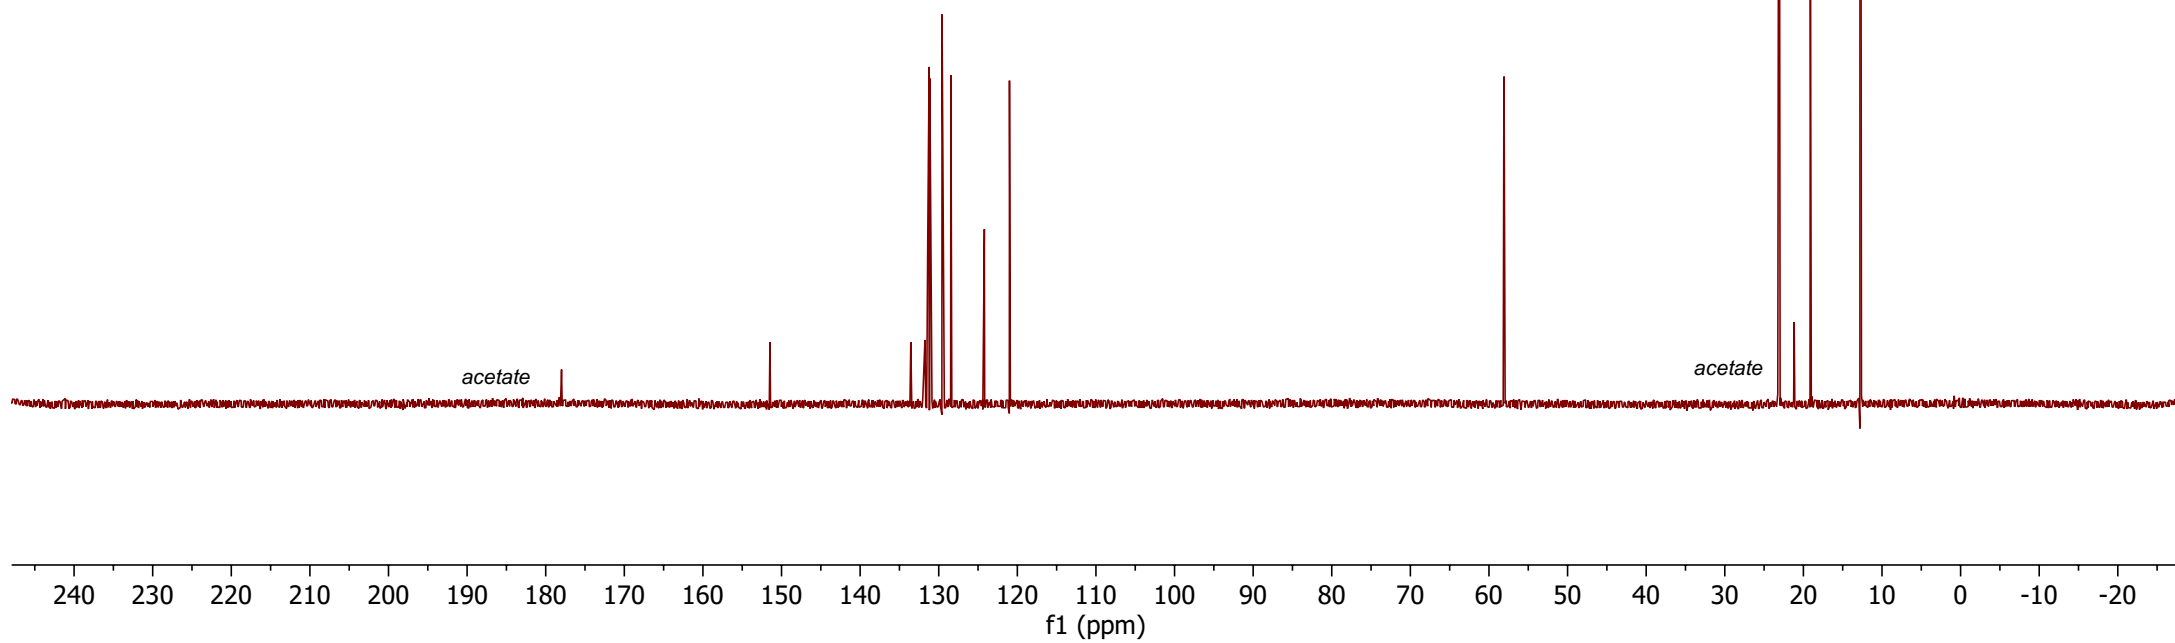

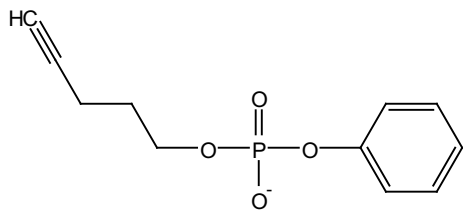

TBA - salt

**55**

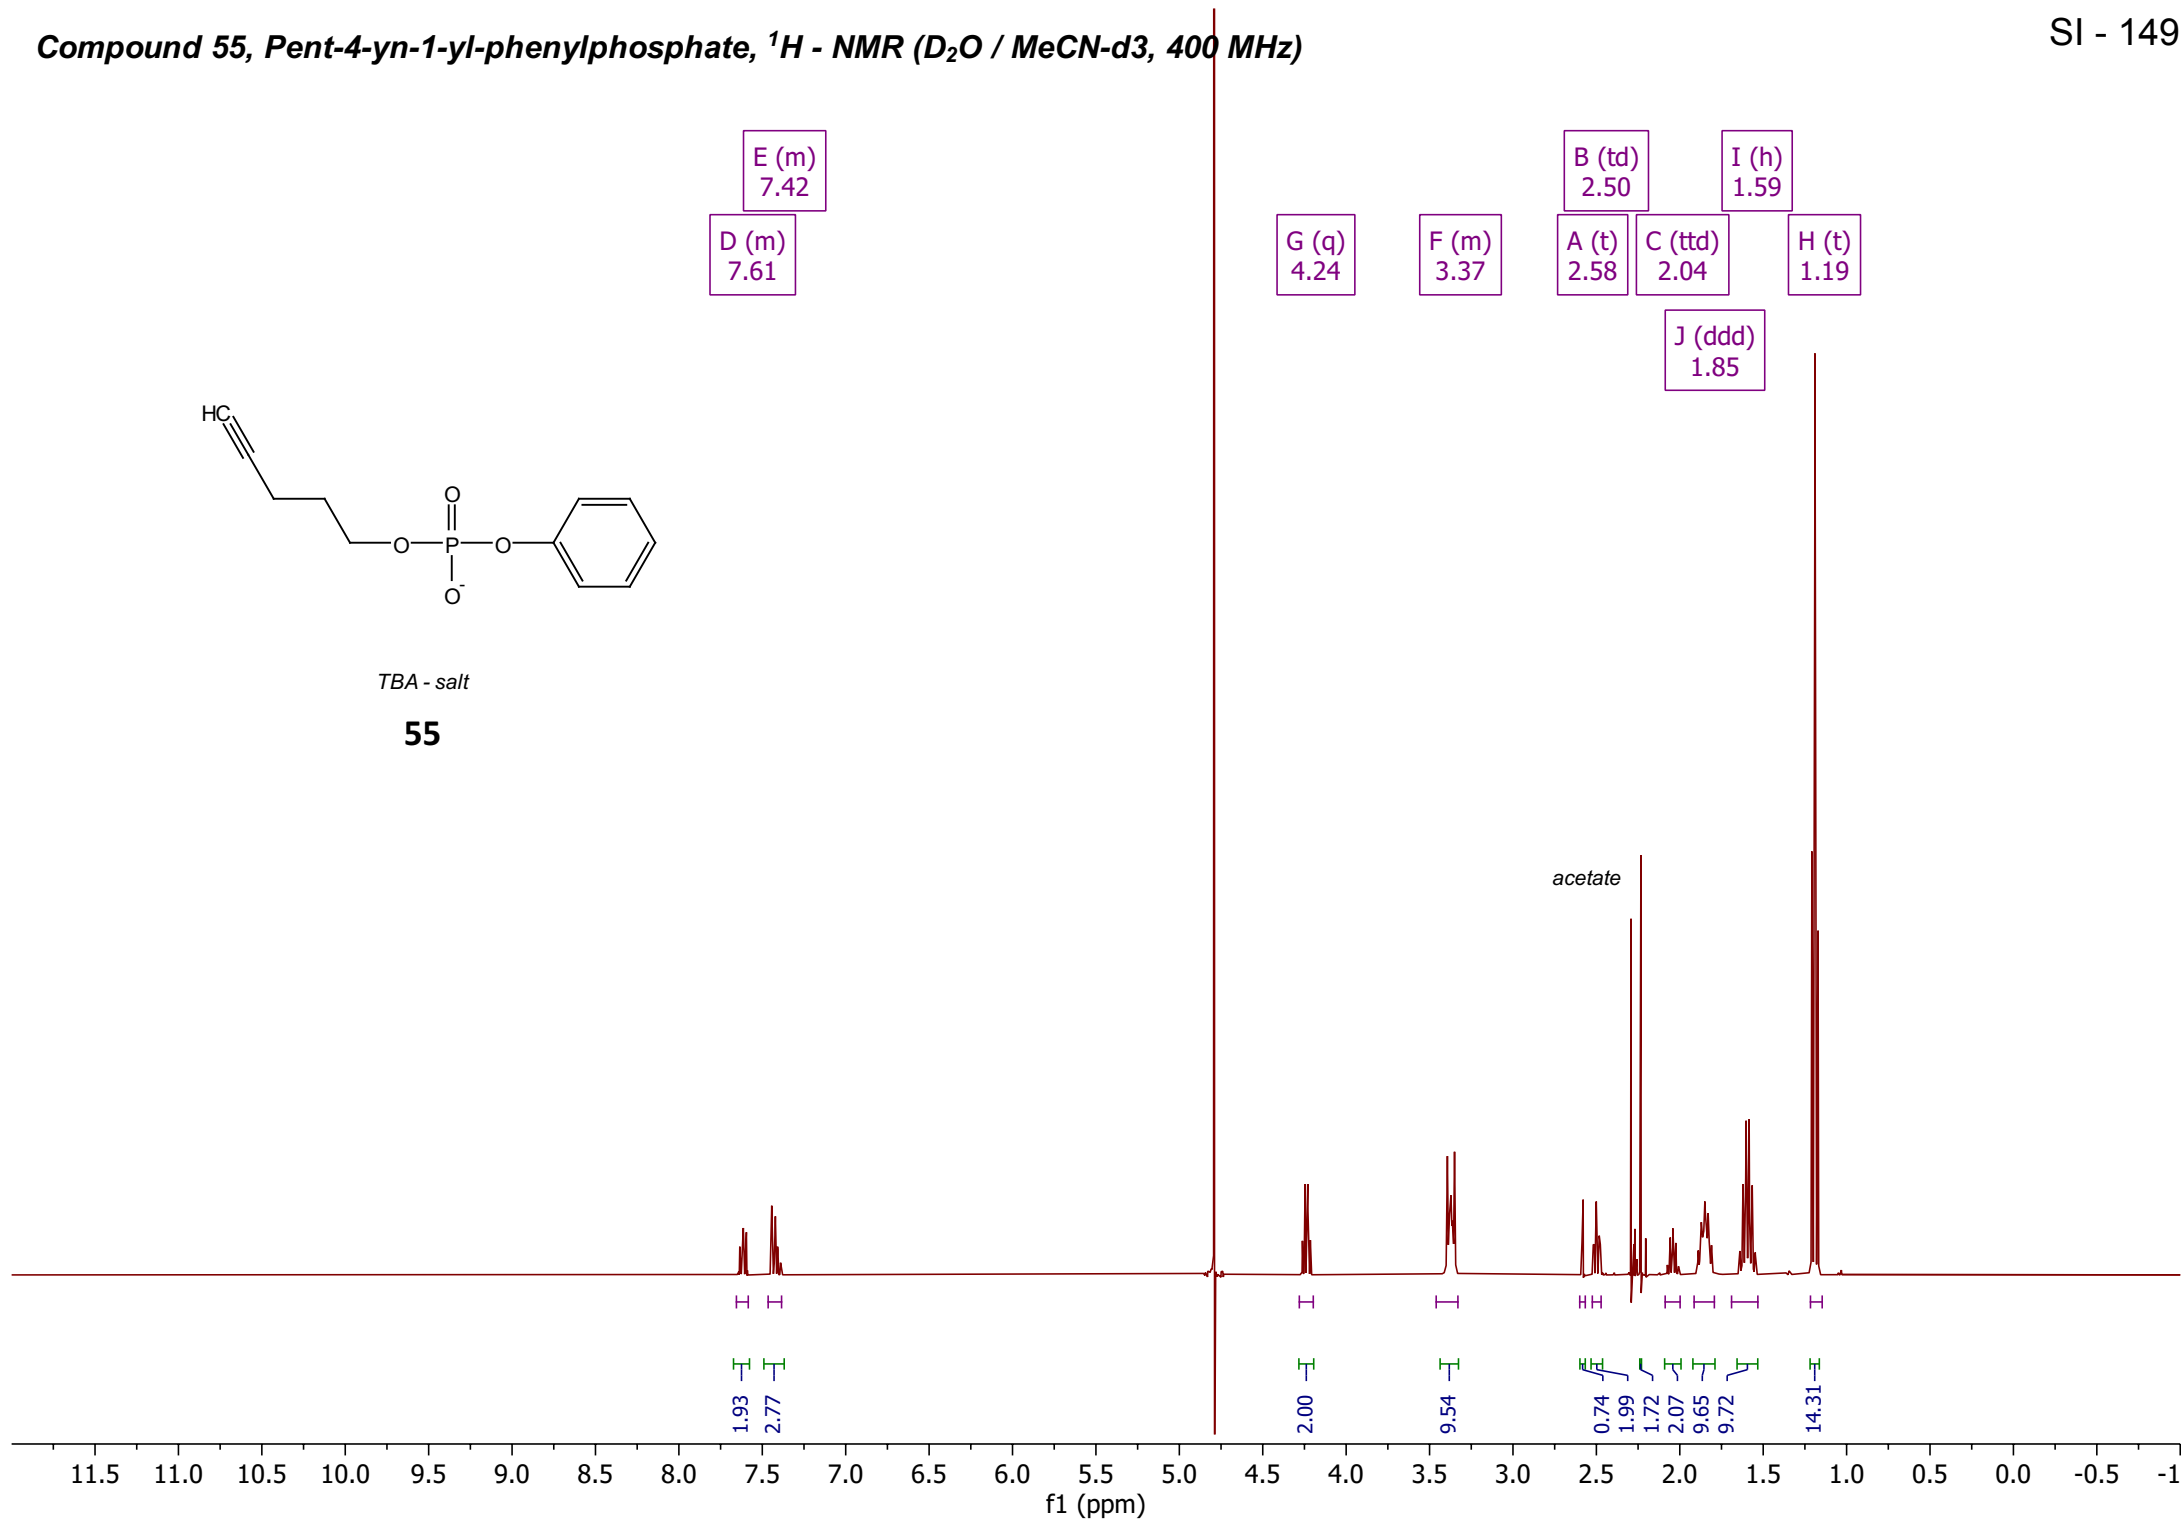



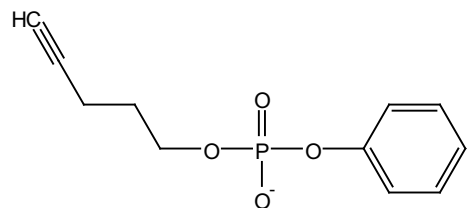

TBA - salt

**55**

A (s)  
-4.34



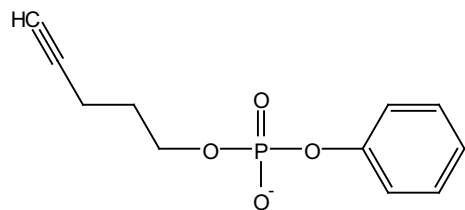

TBA - salt

**55**

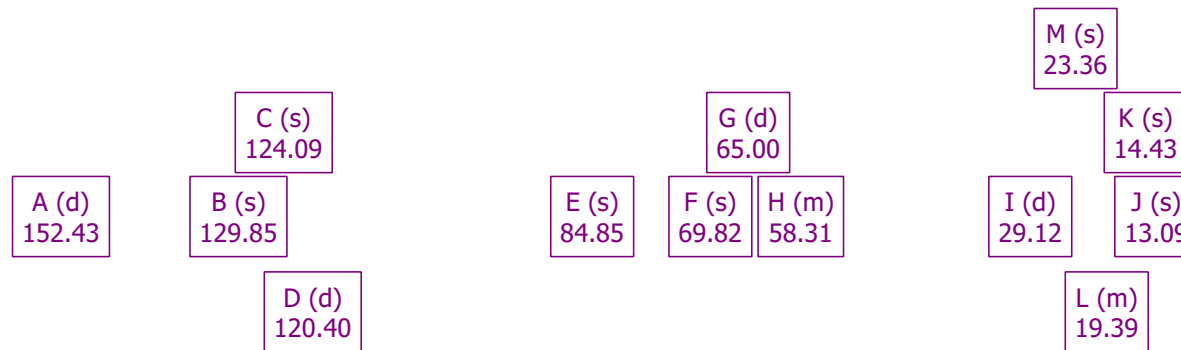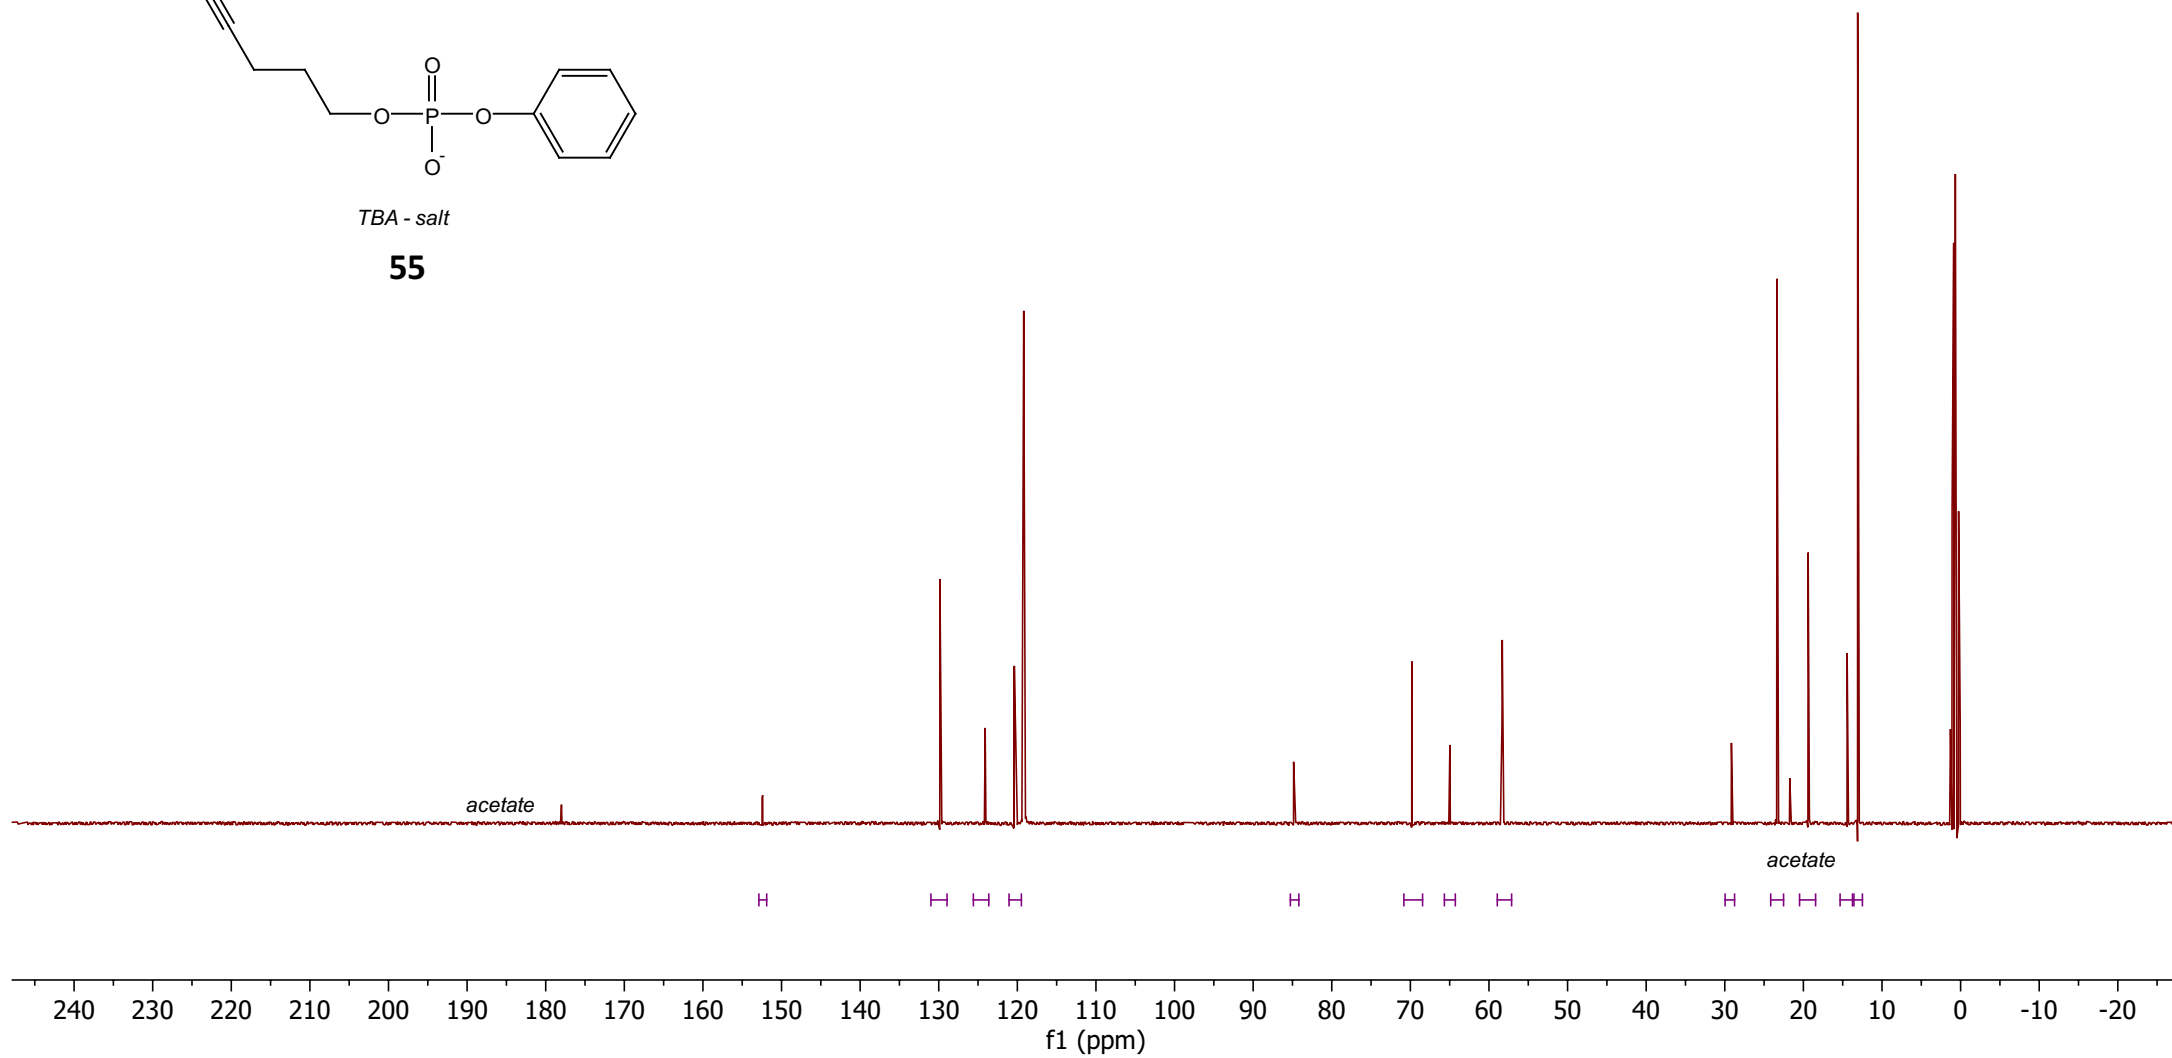

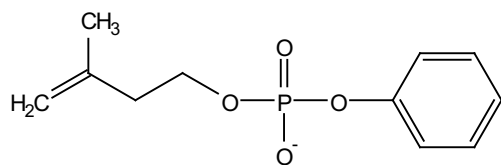

TEA- salt

**56**

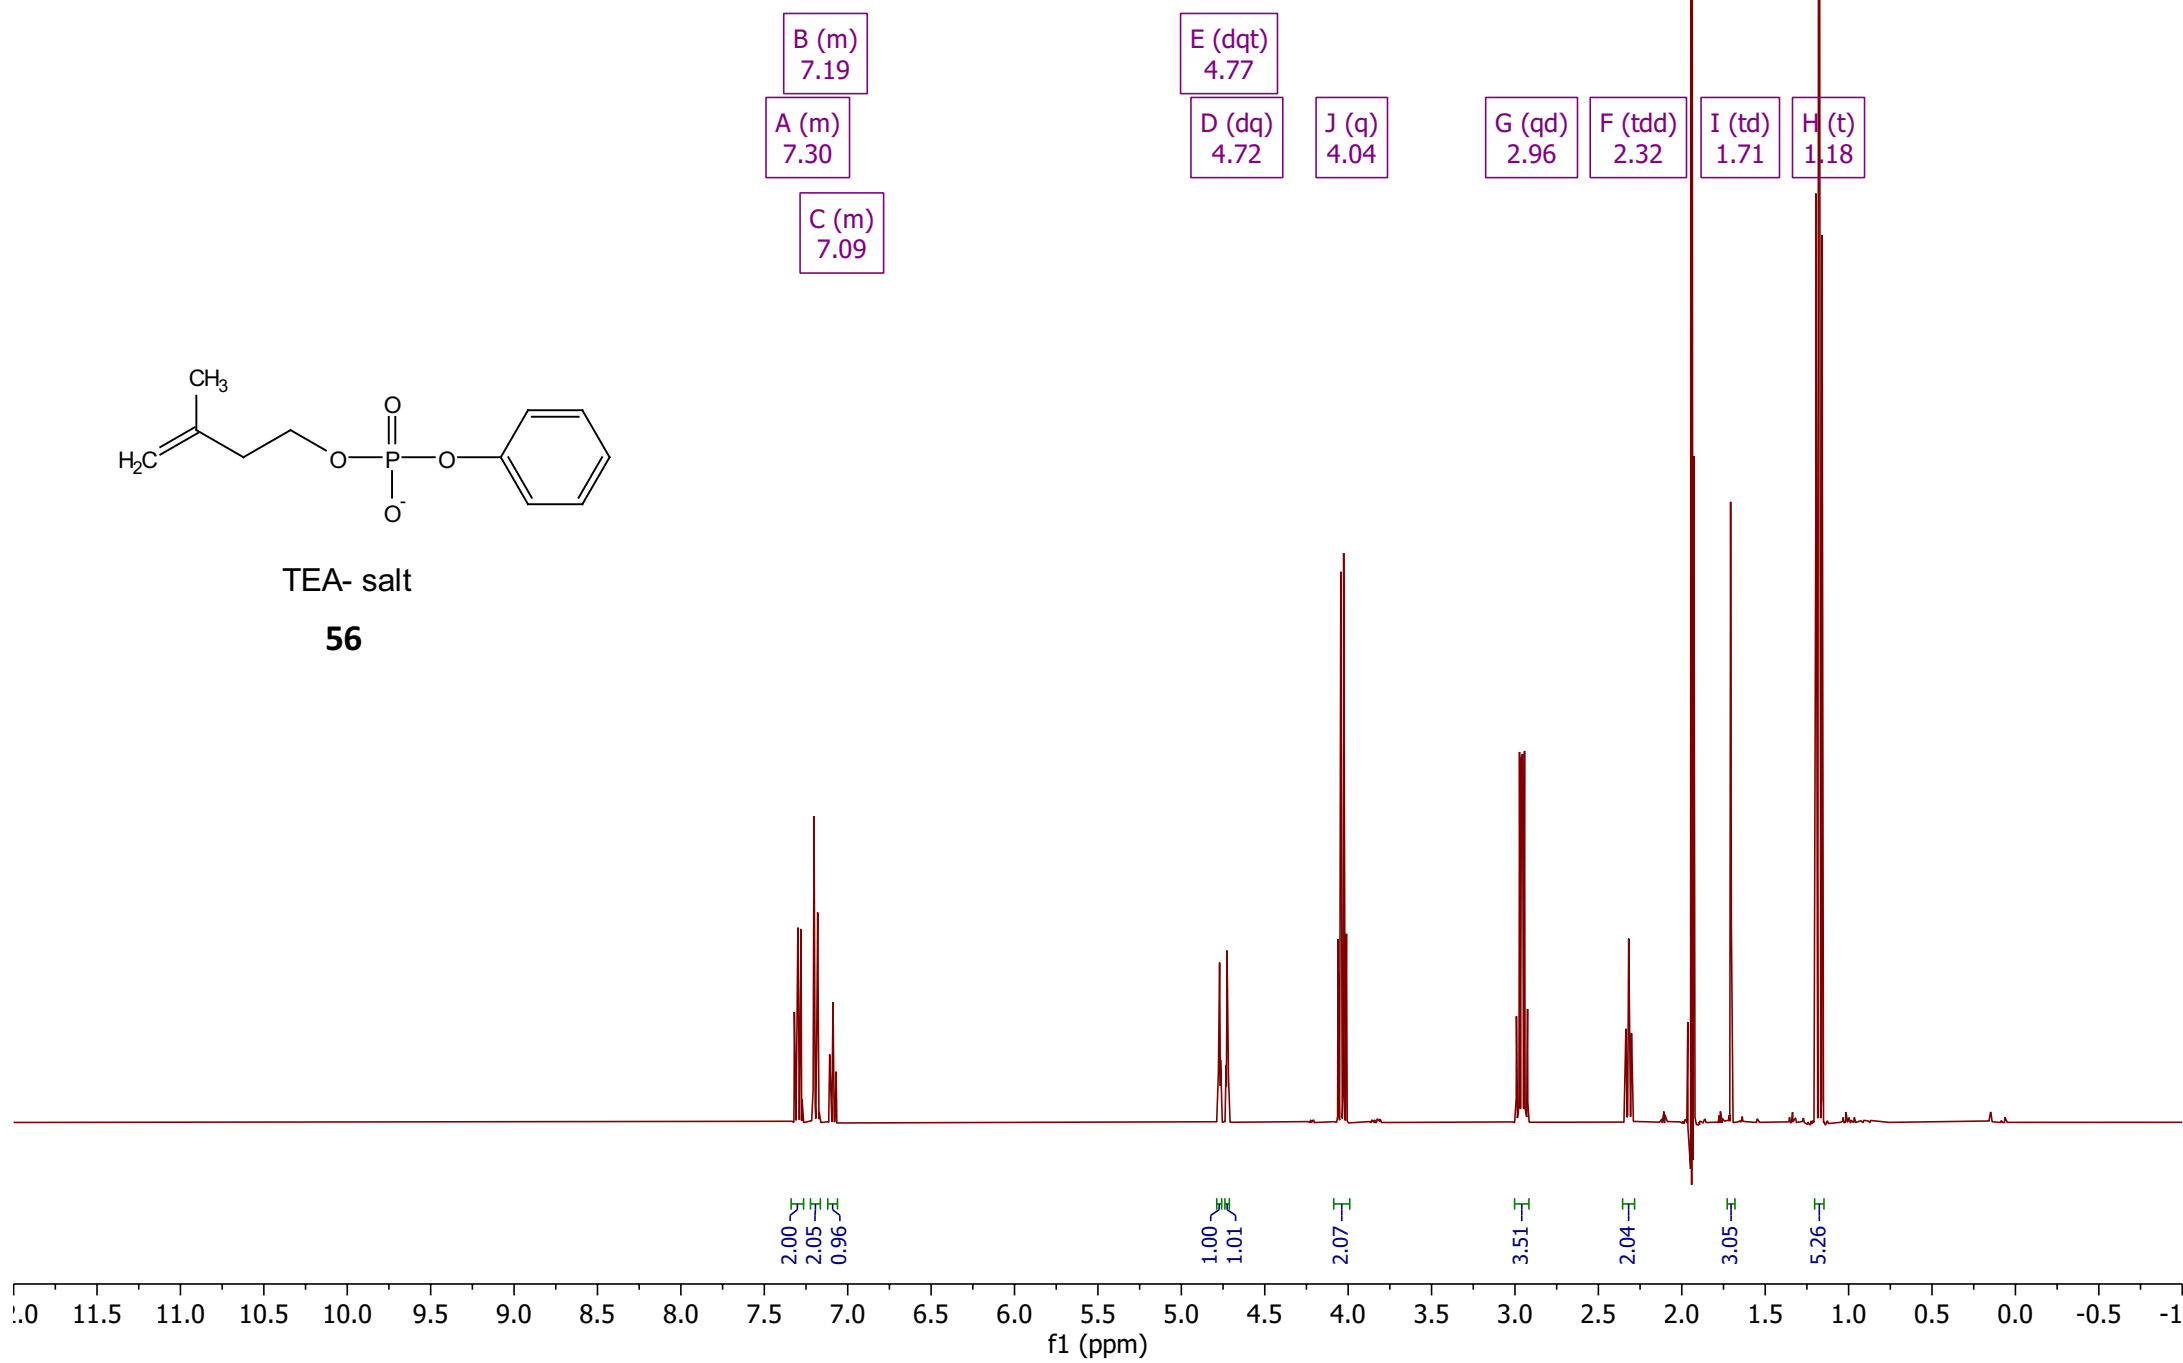

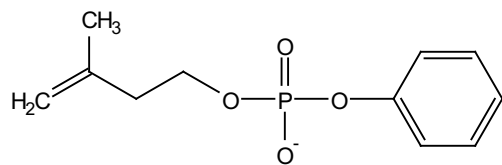

TEA- salt  
**56**

A (s)  
-6.95

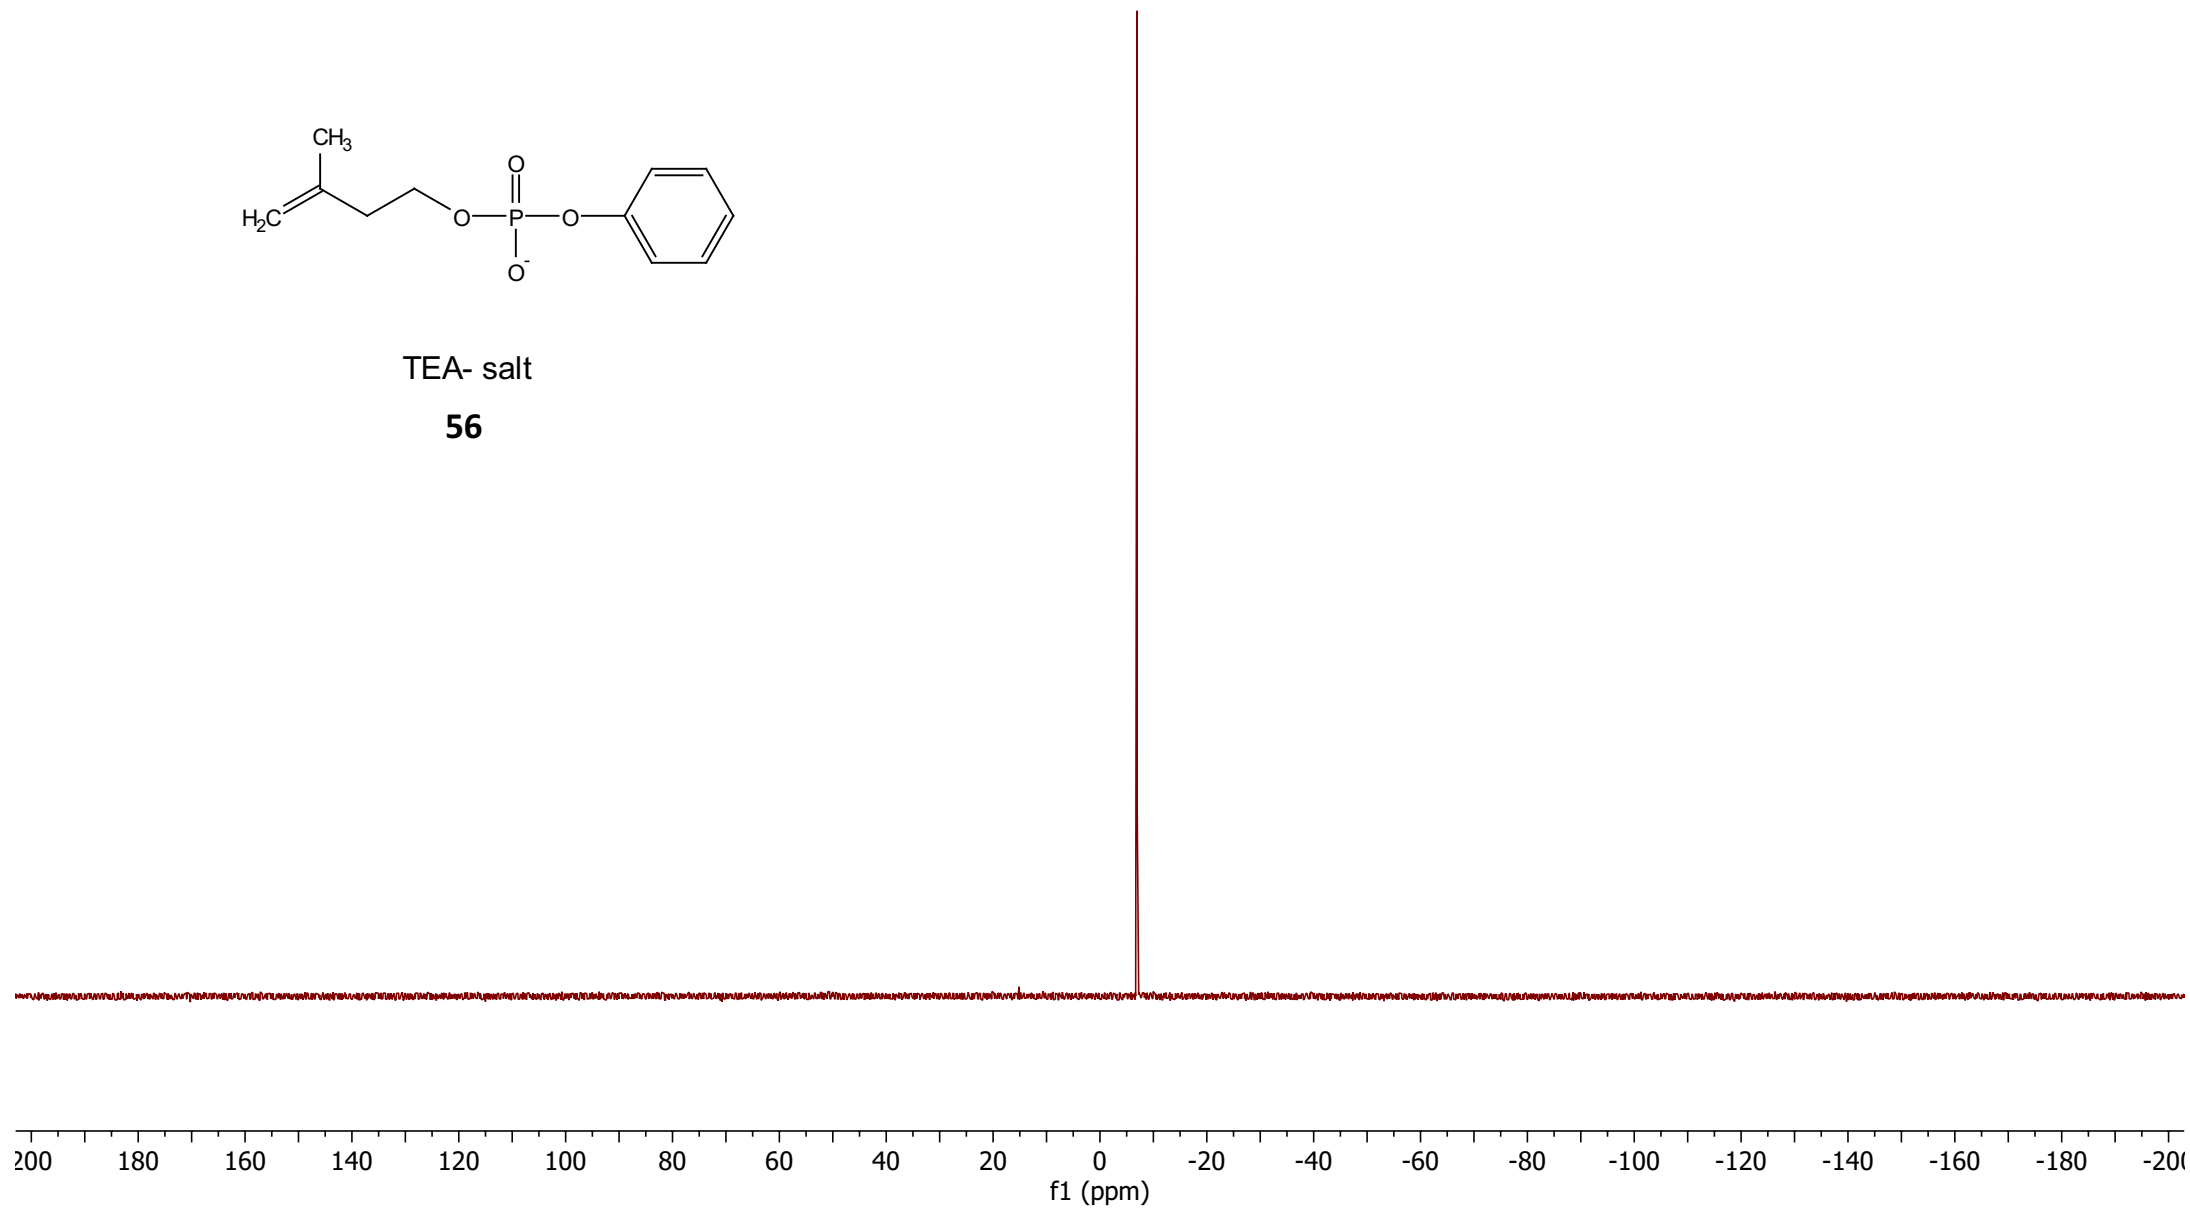

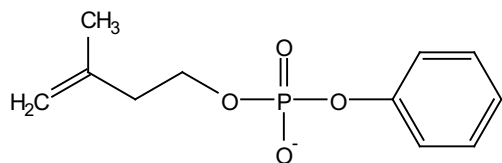

TEA- salt  
**56**

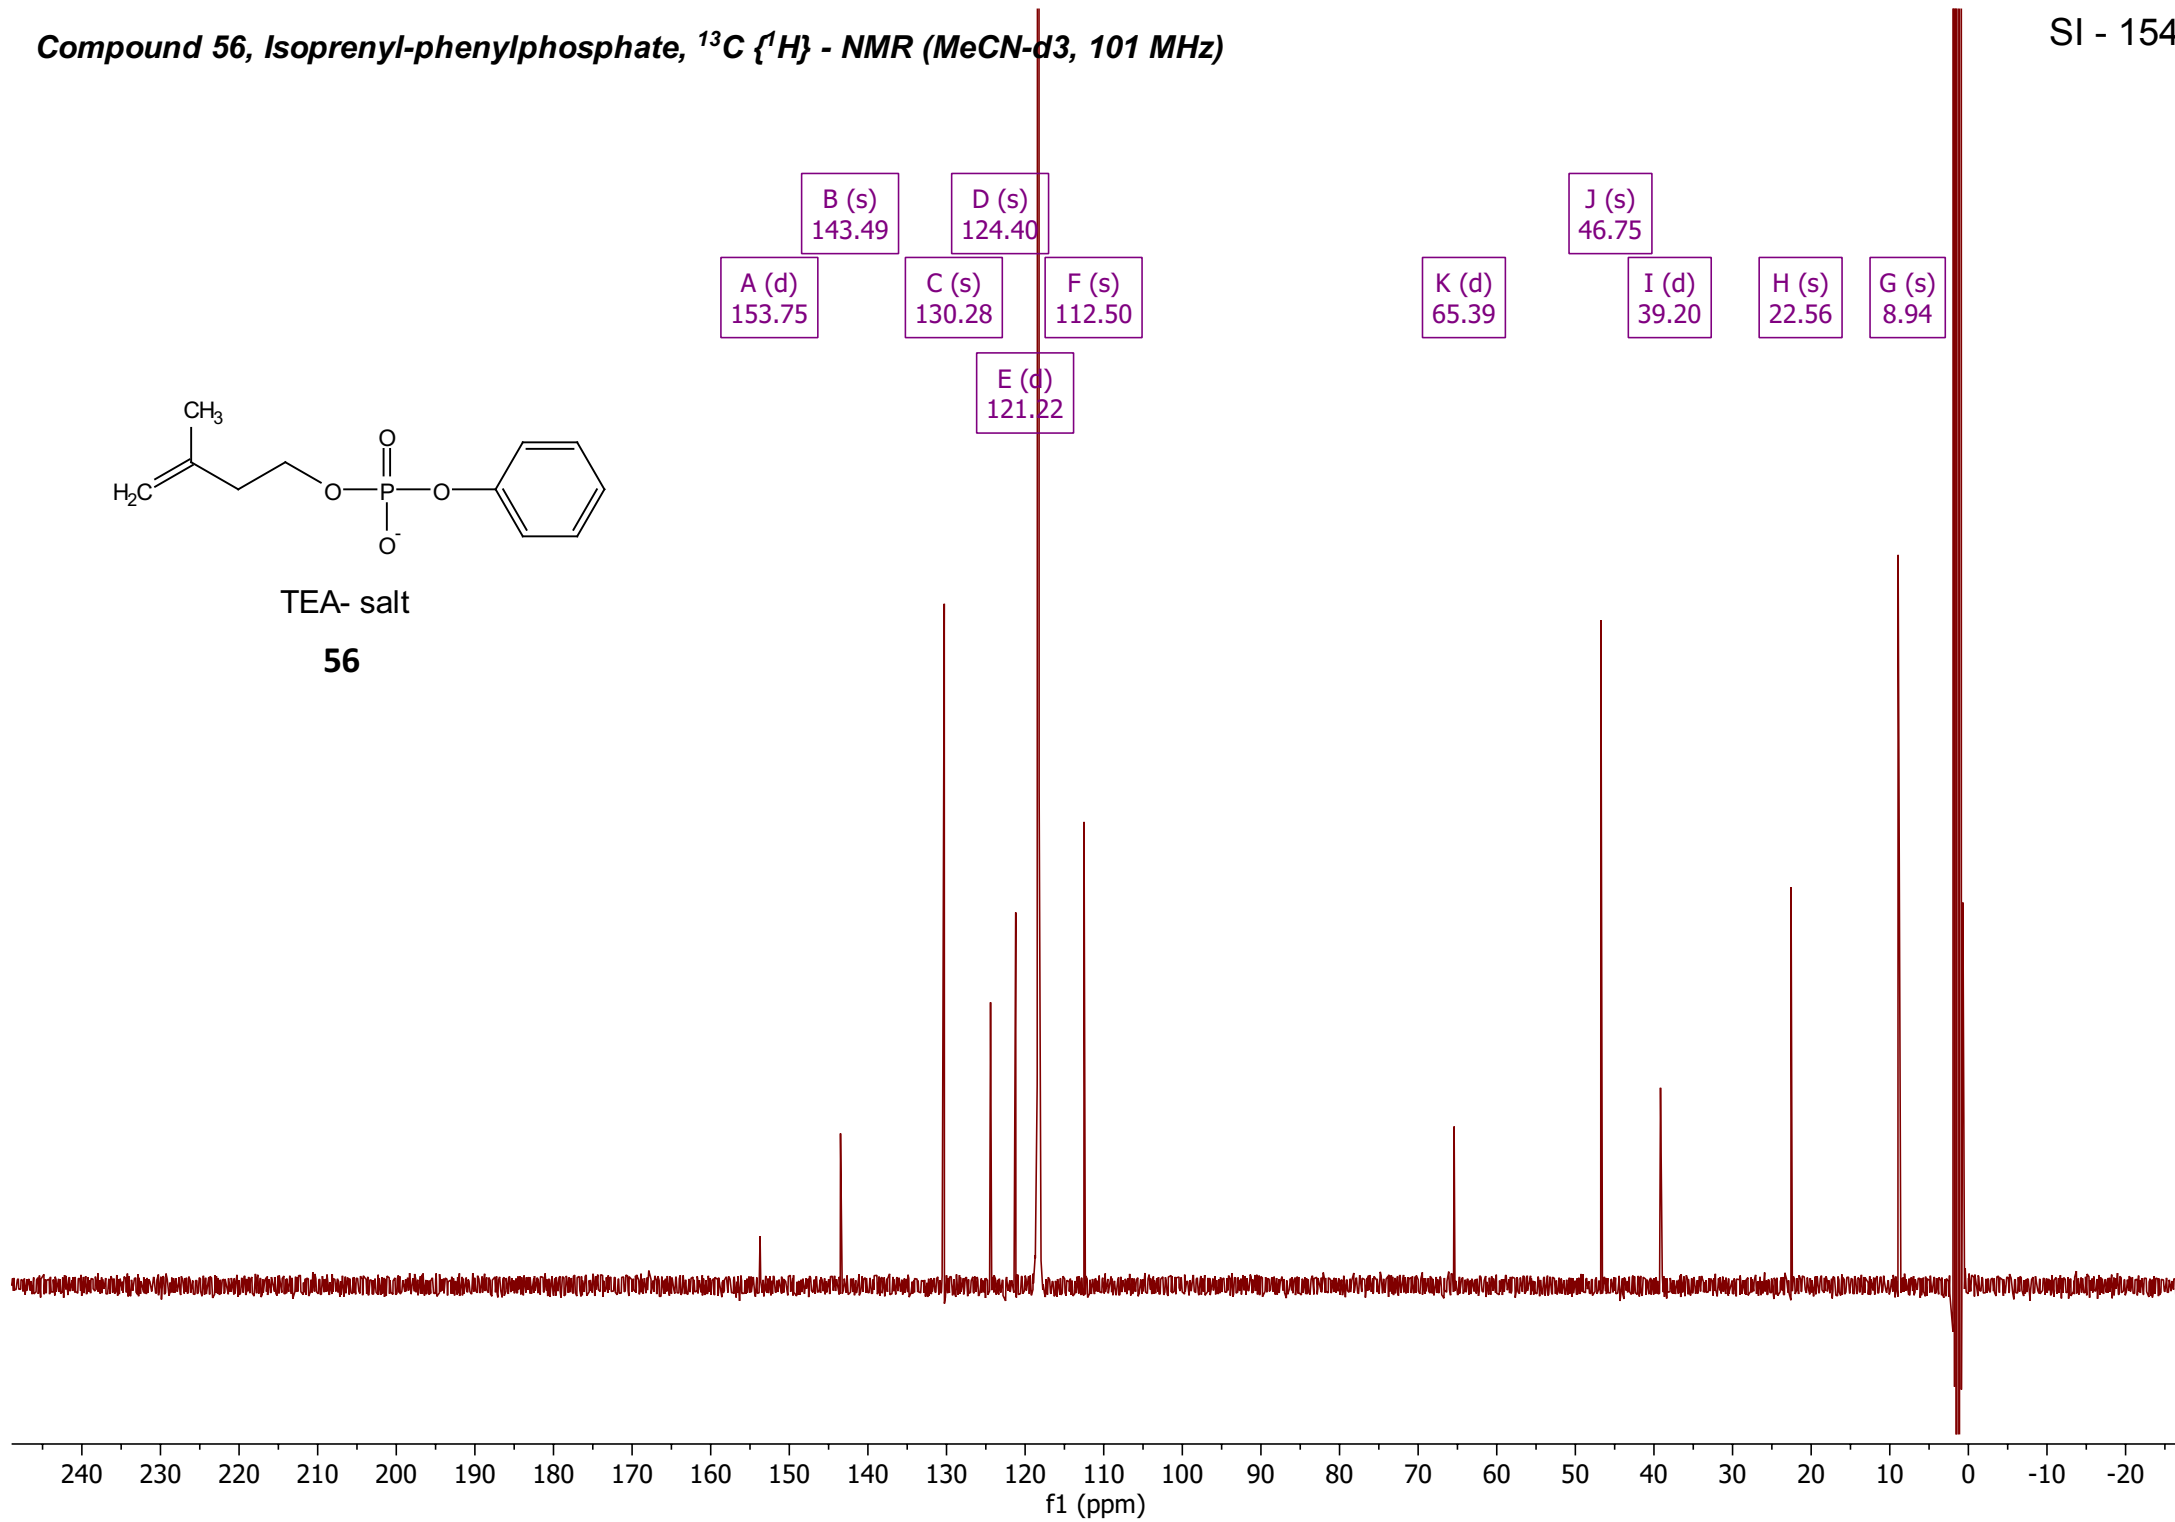

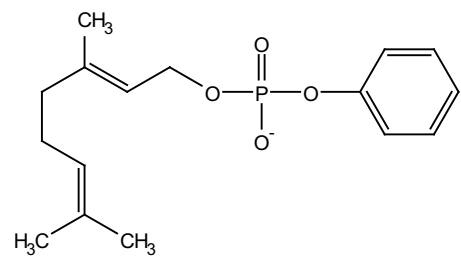

TEA - salt

57

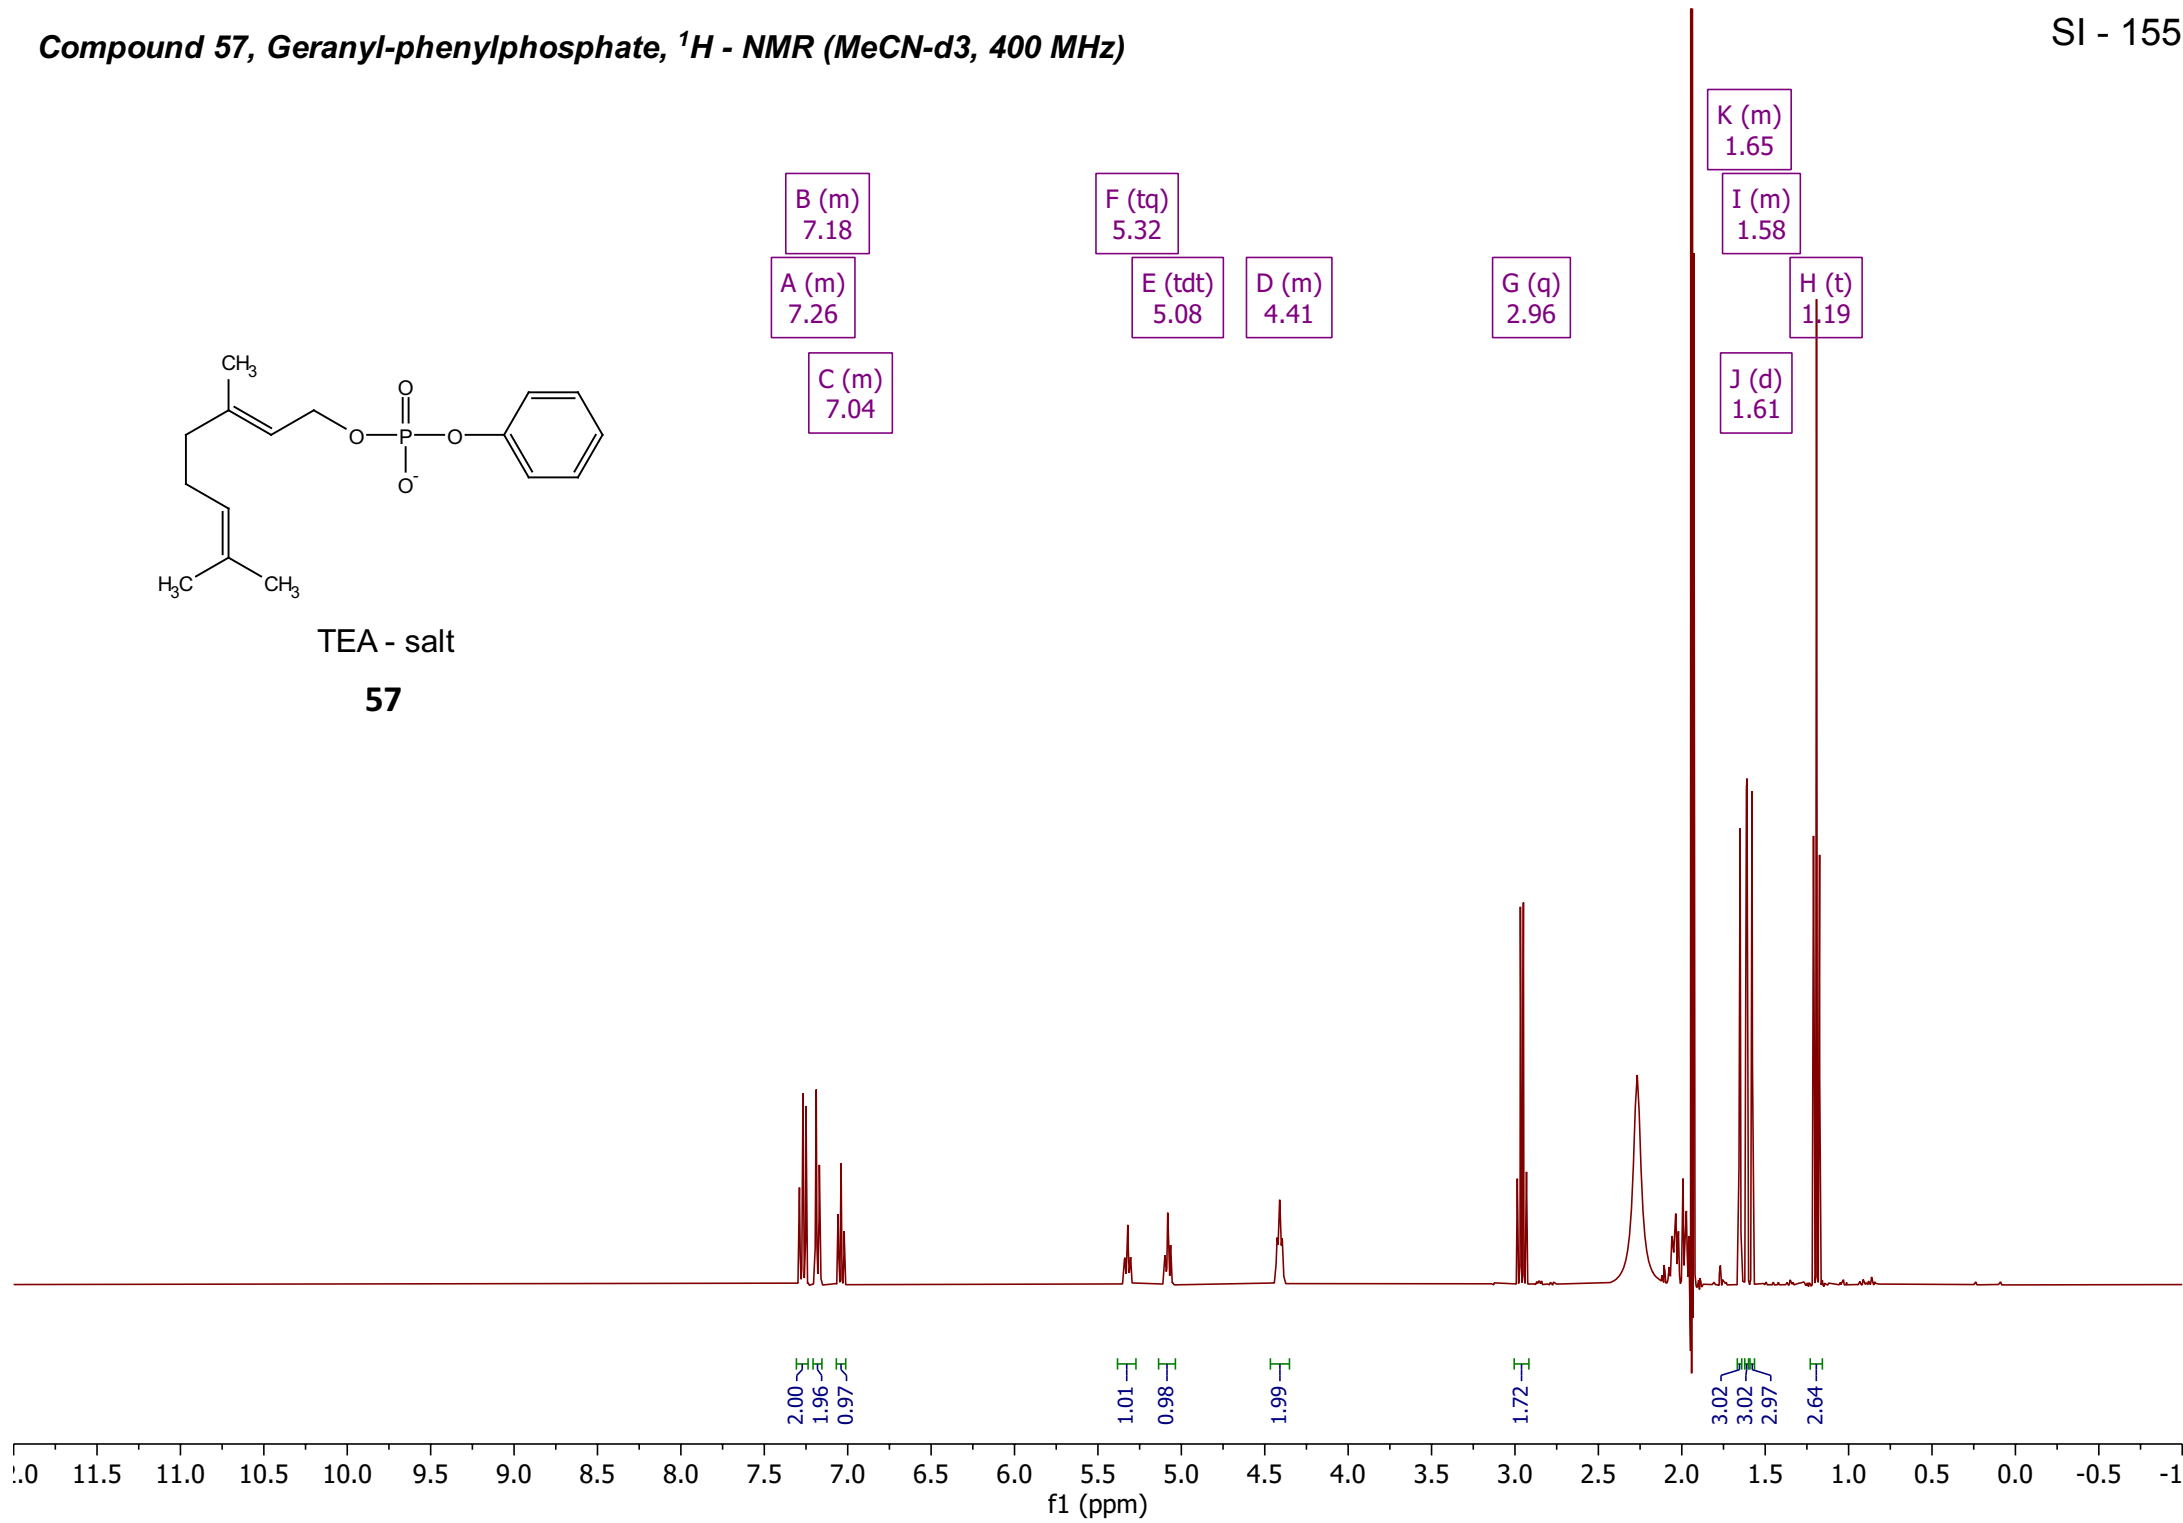

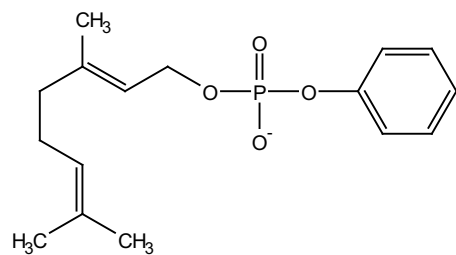

TEA - salt

**57**

A (s)  
-5.83



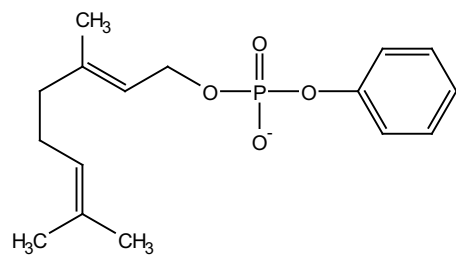

TEA - salt

**57**

A (t)  
-5.83

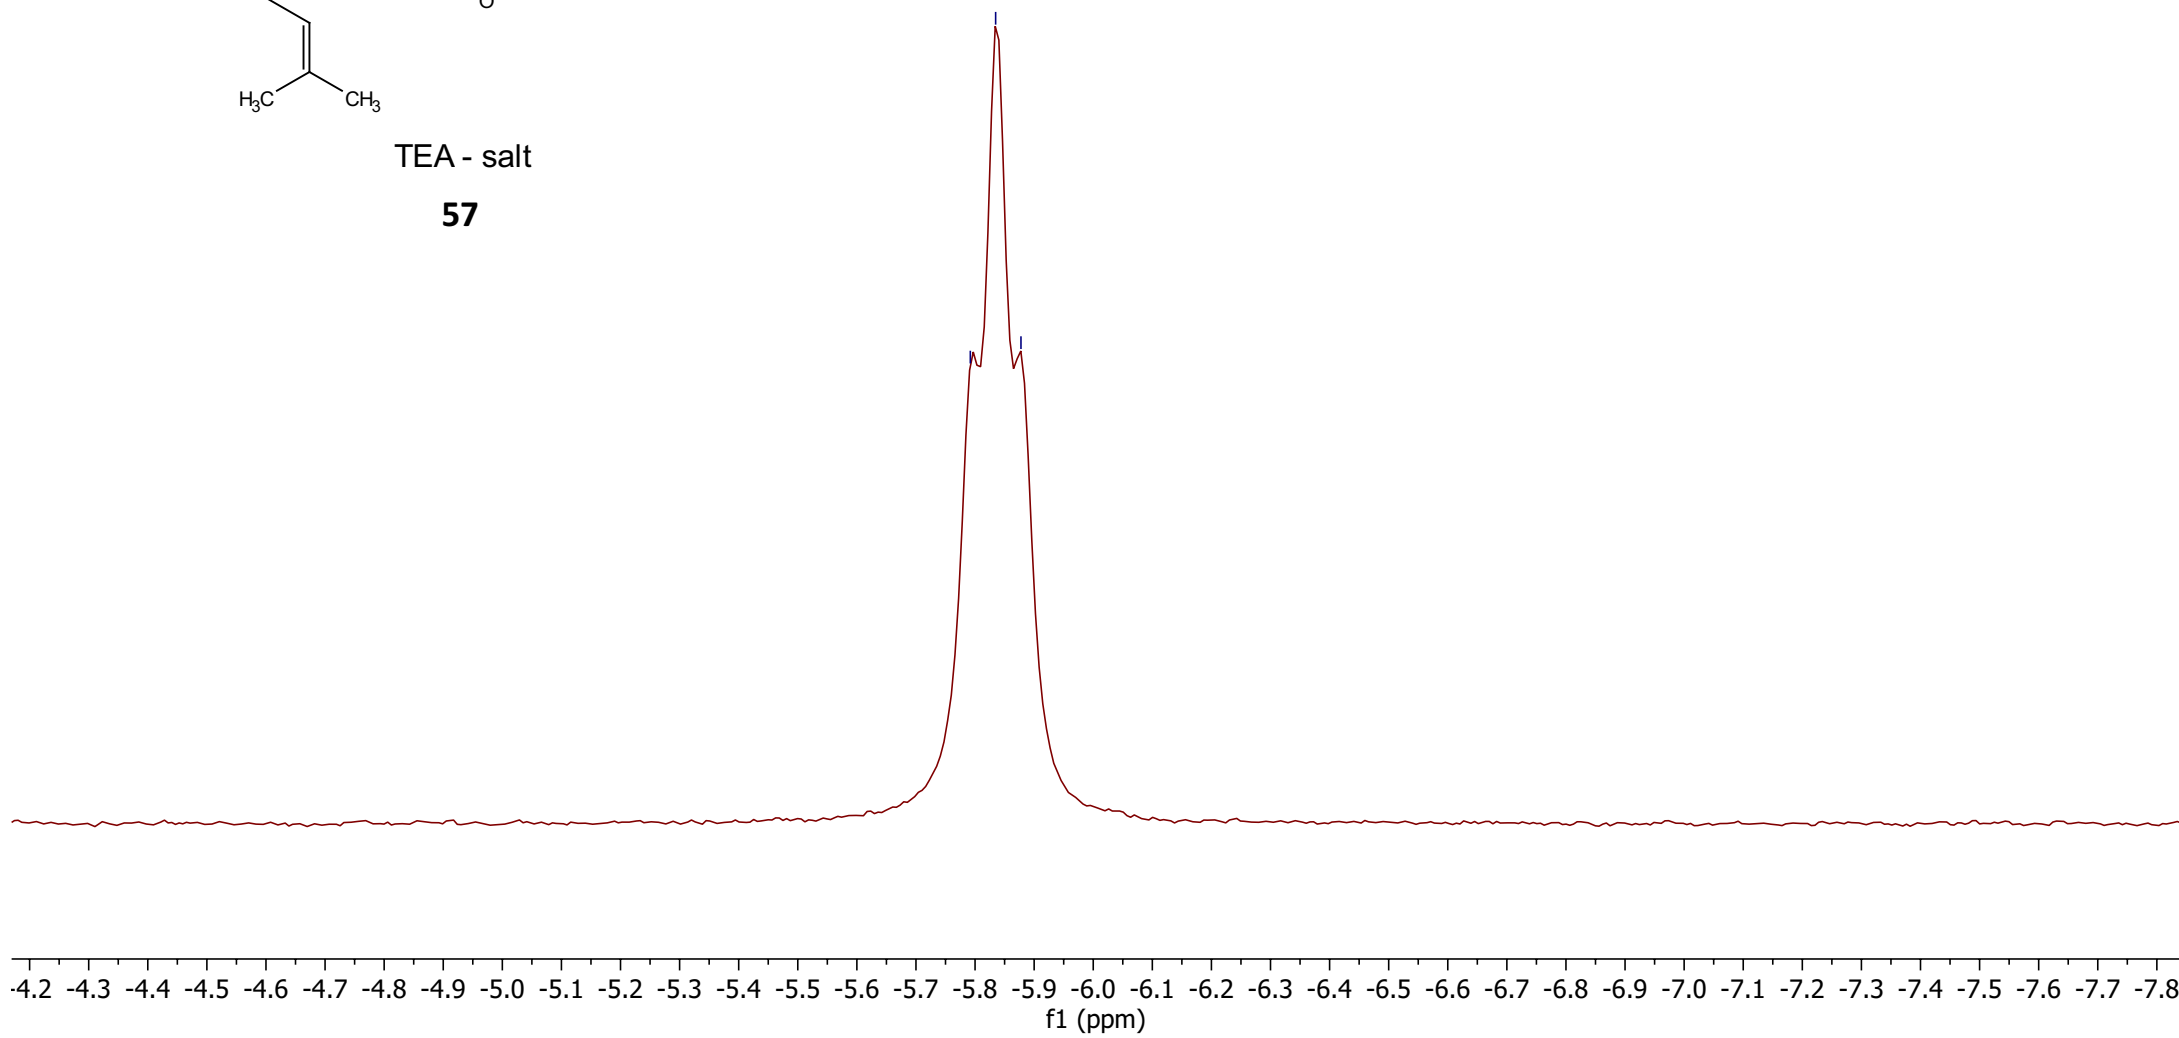



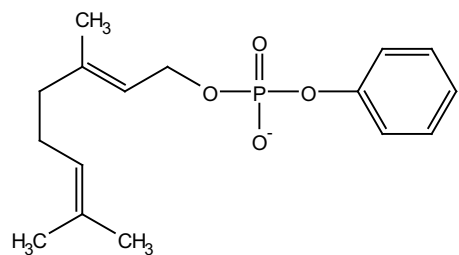

TEA - salt

**57**

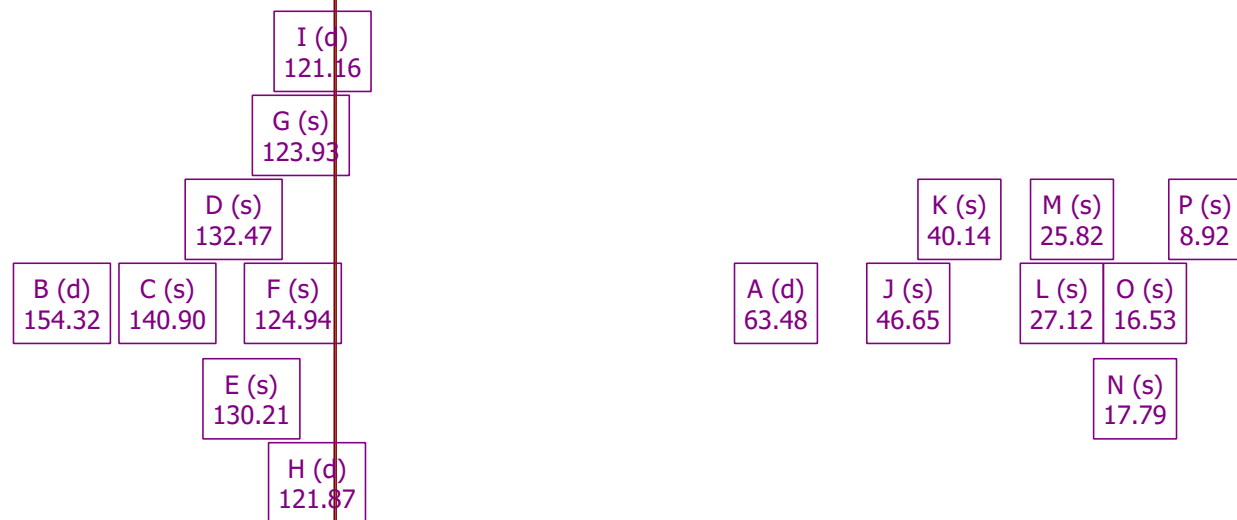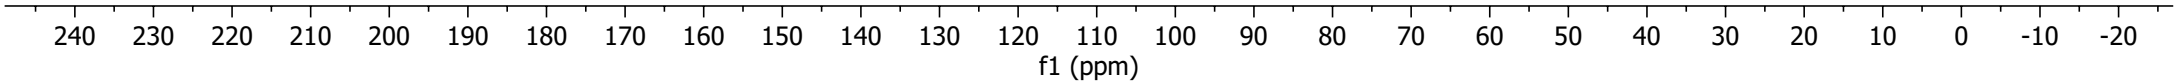

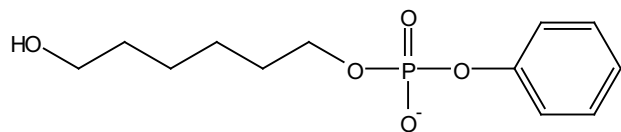

TBA - salt

**58**

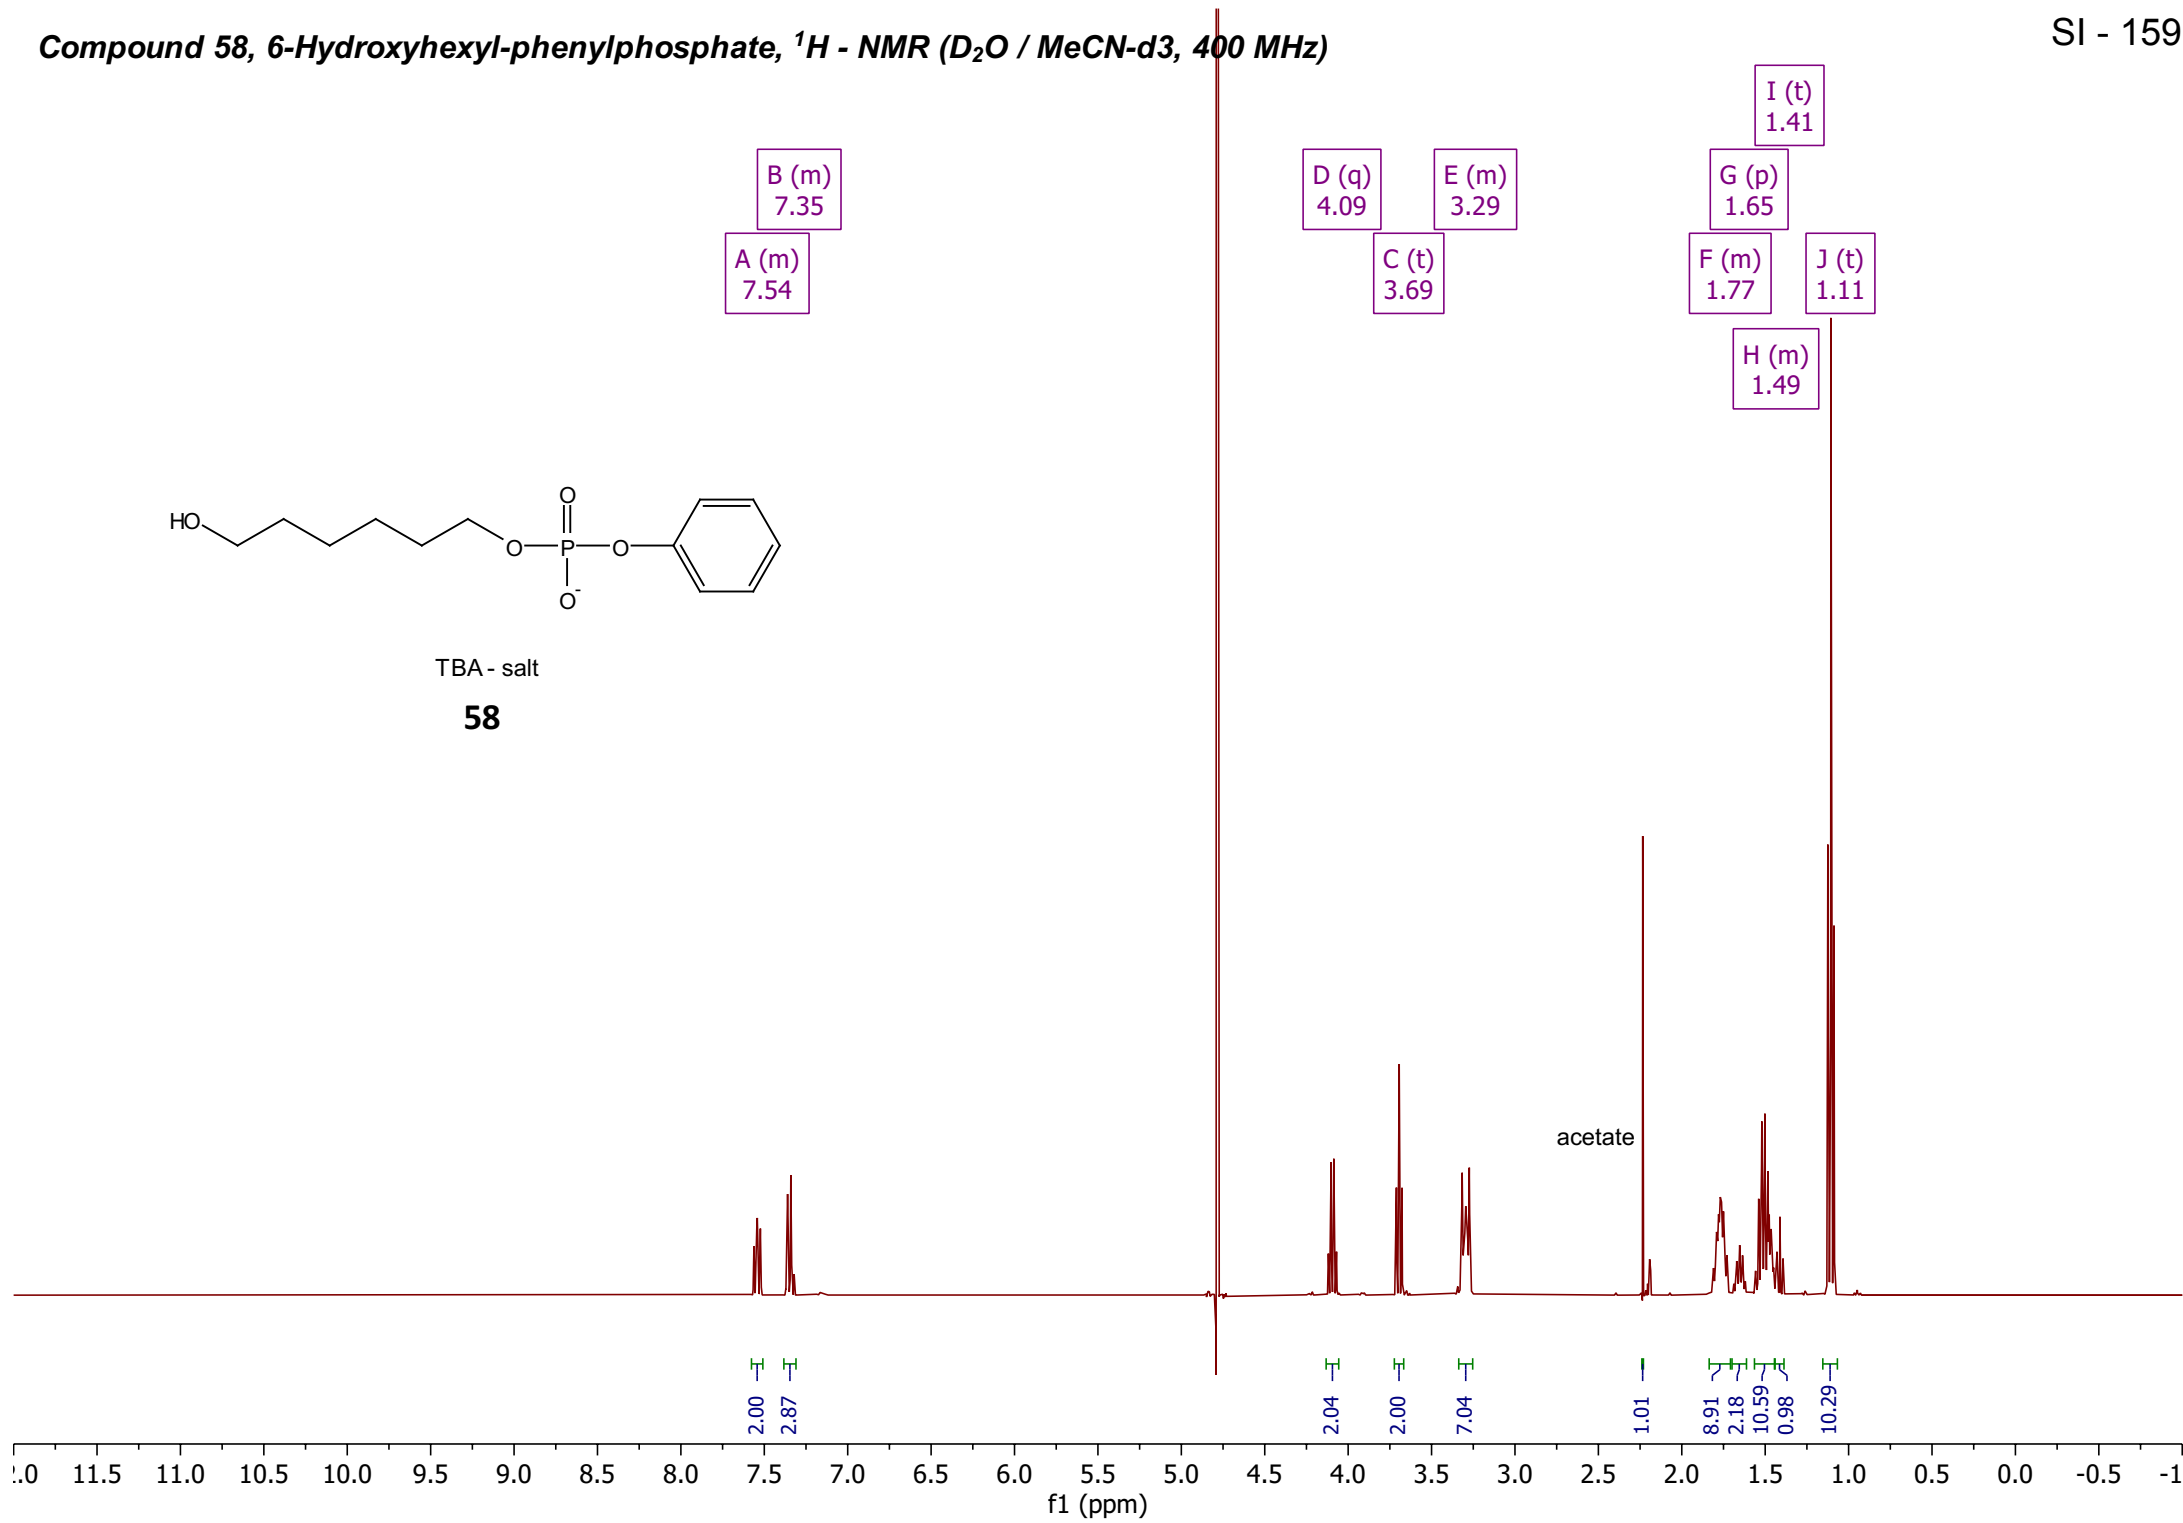

A (s)  
-4.22

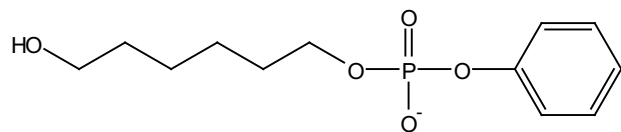

TBA - salt

**58**

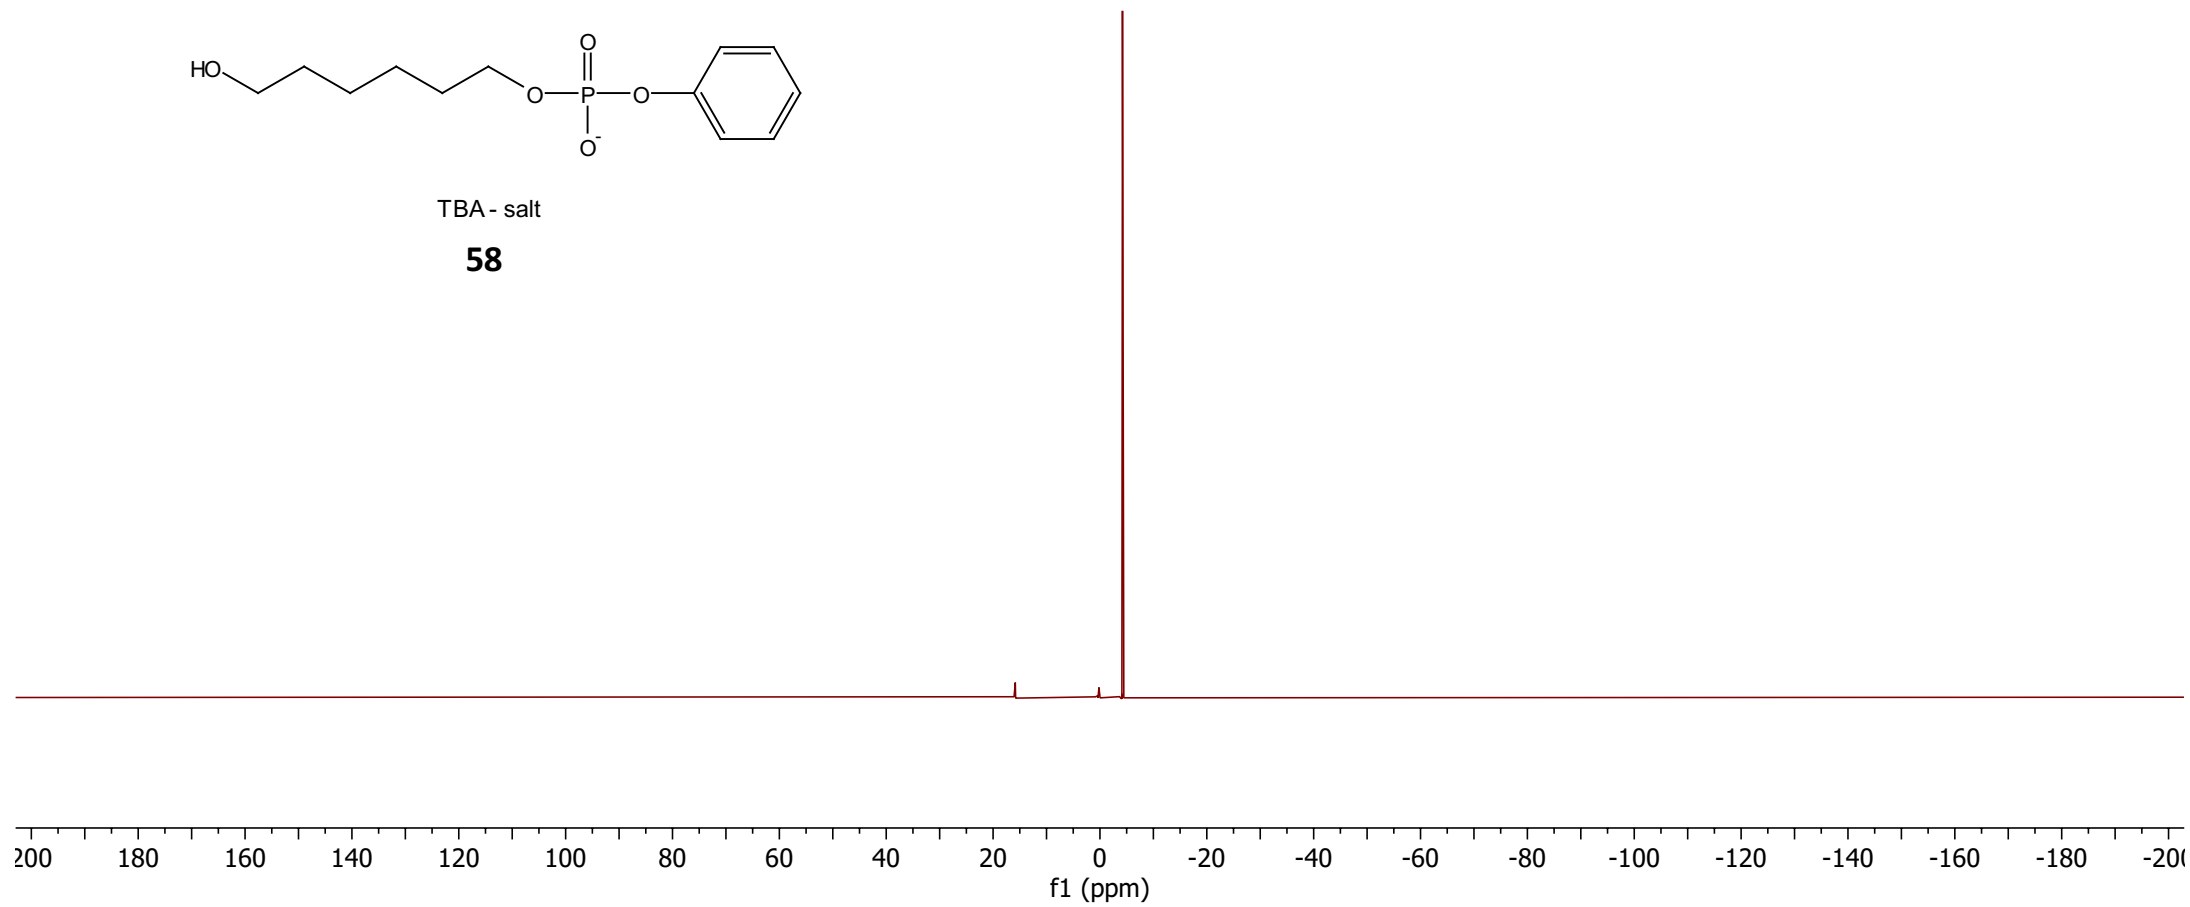

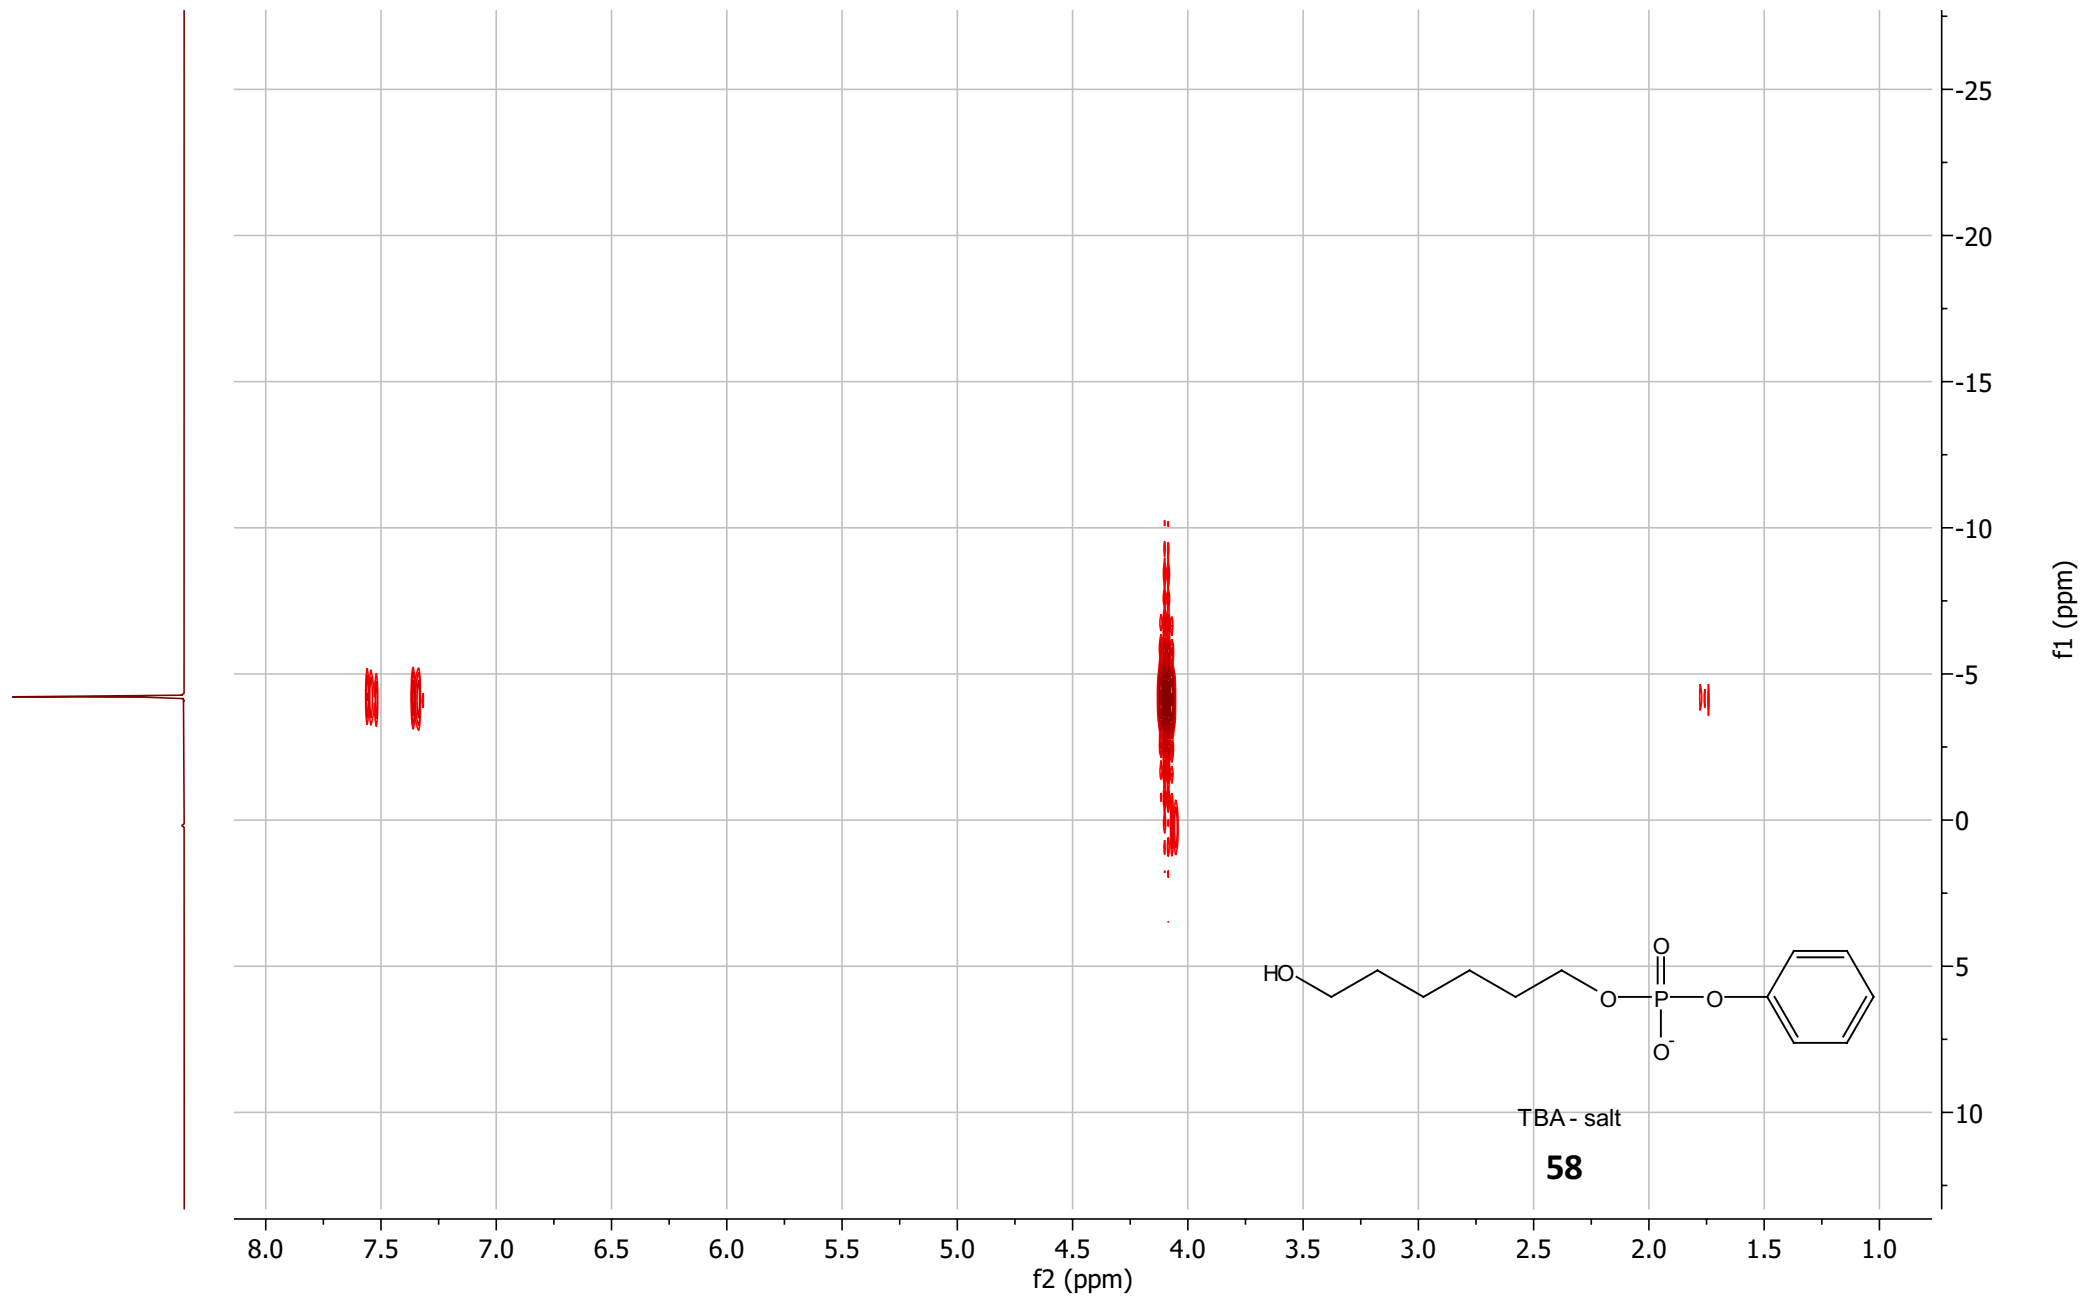

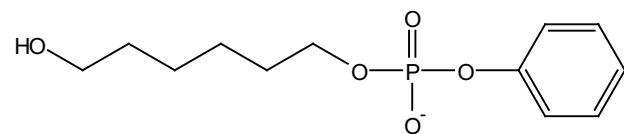

TBA - salt  
**58**

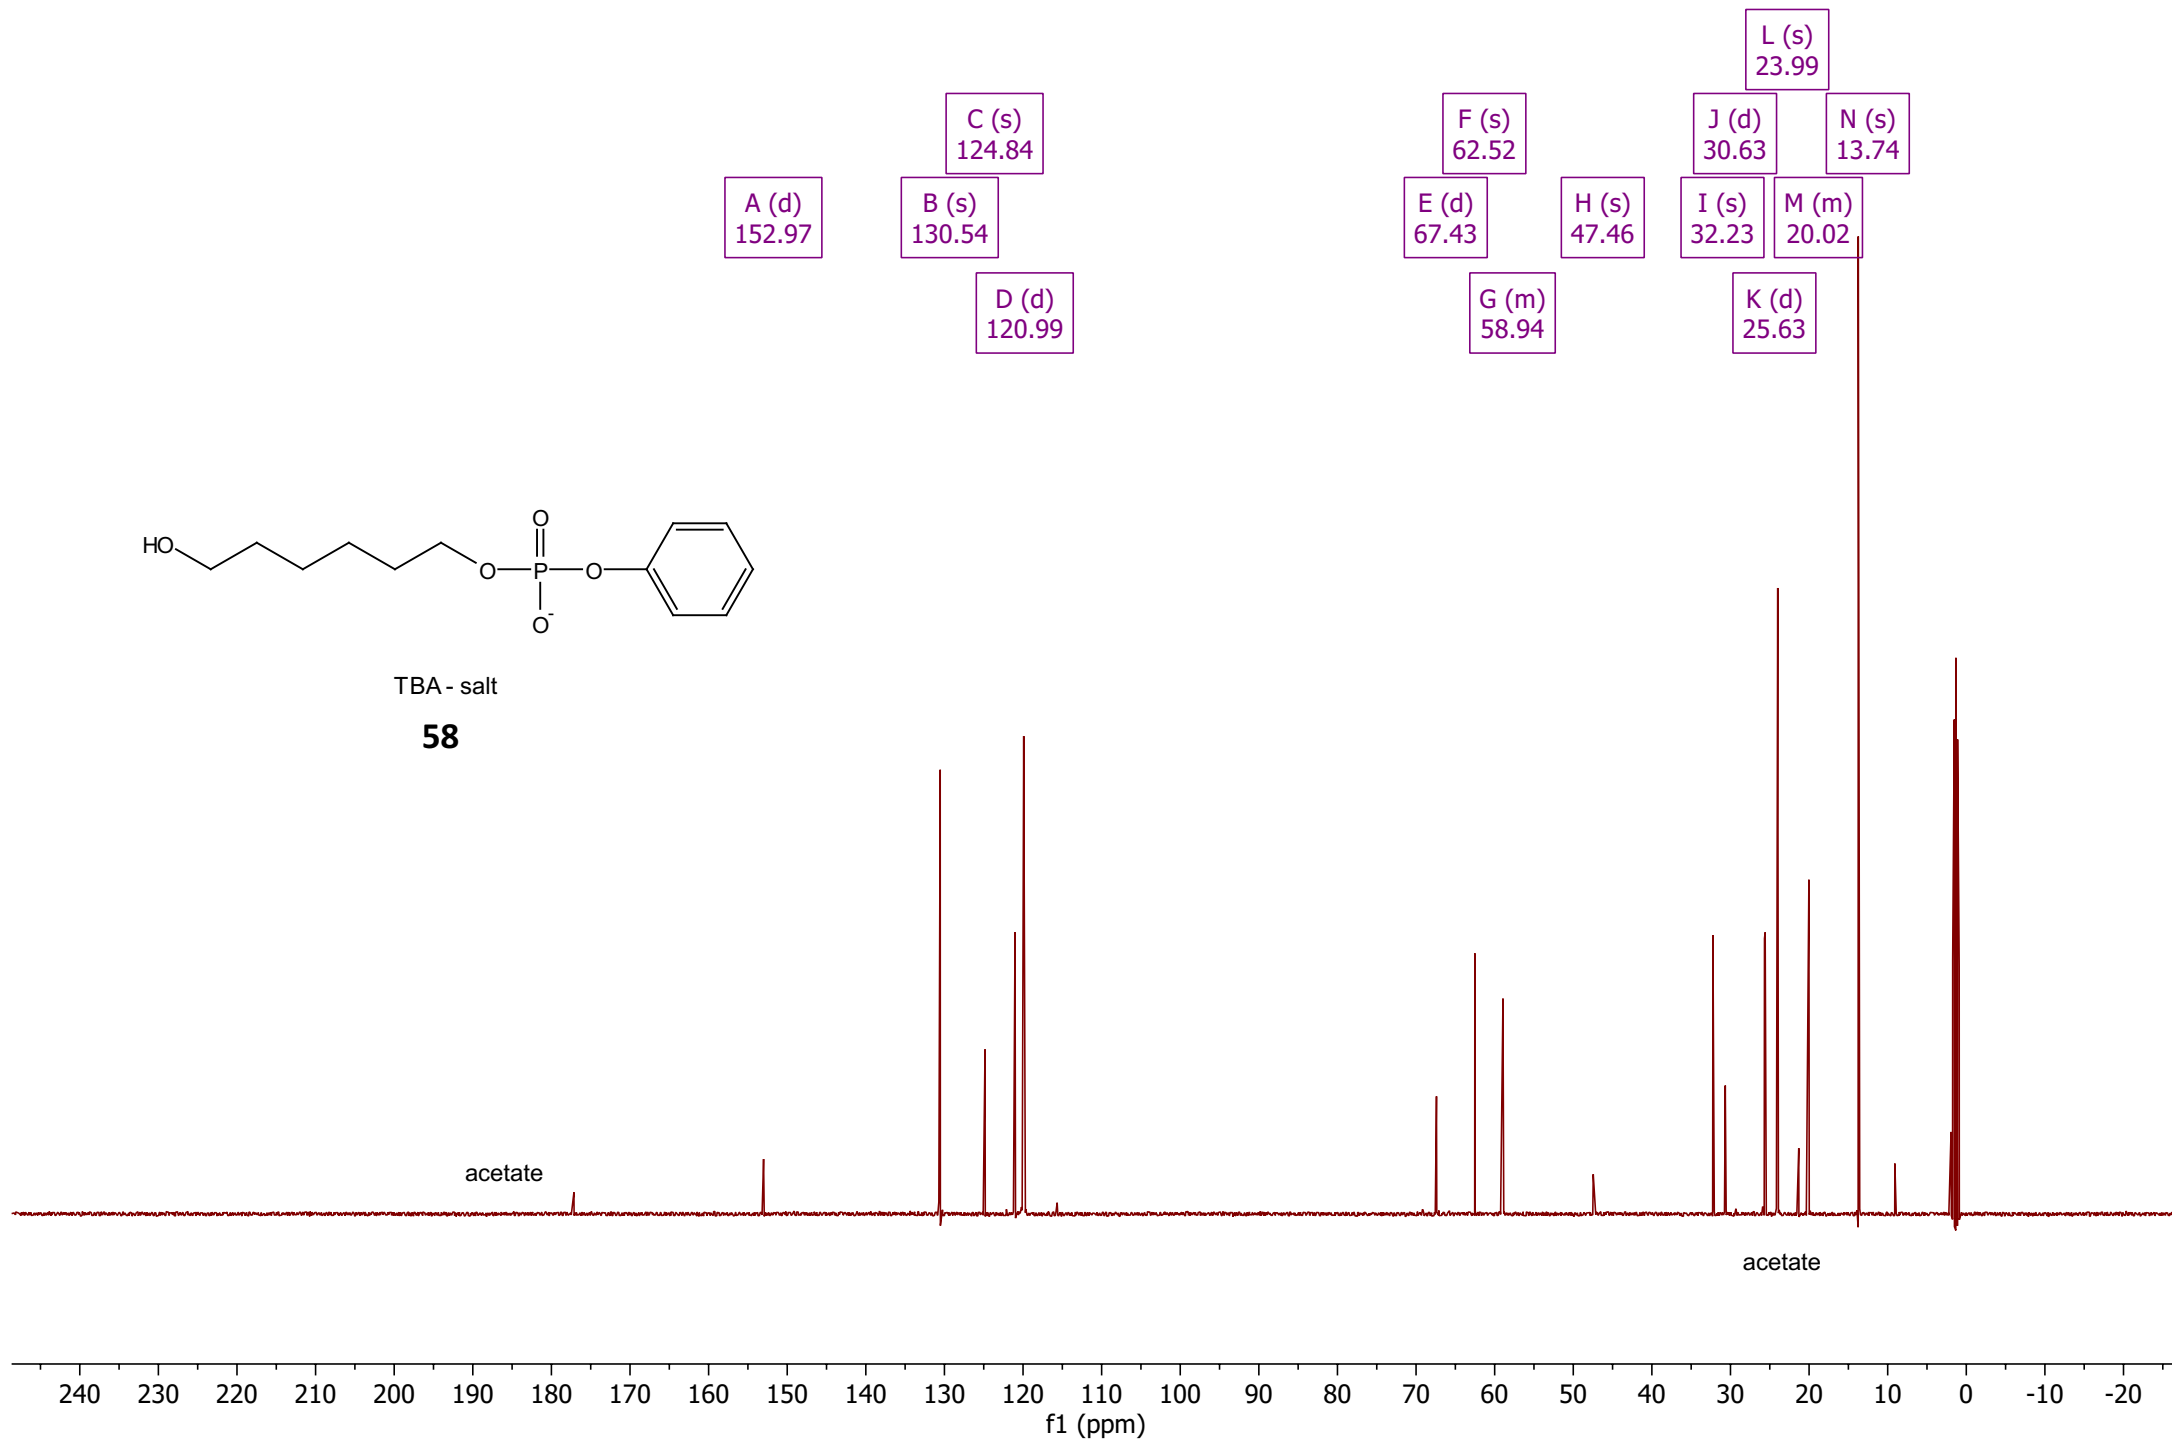

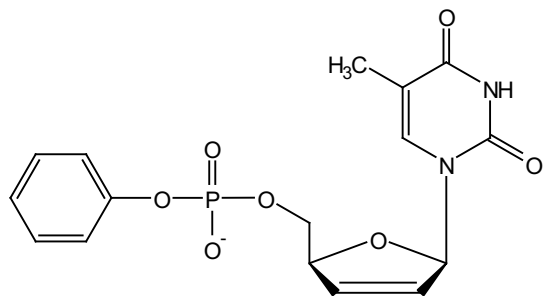

TEA - salt

**59**

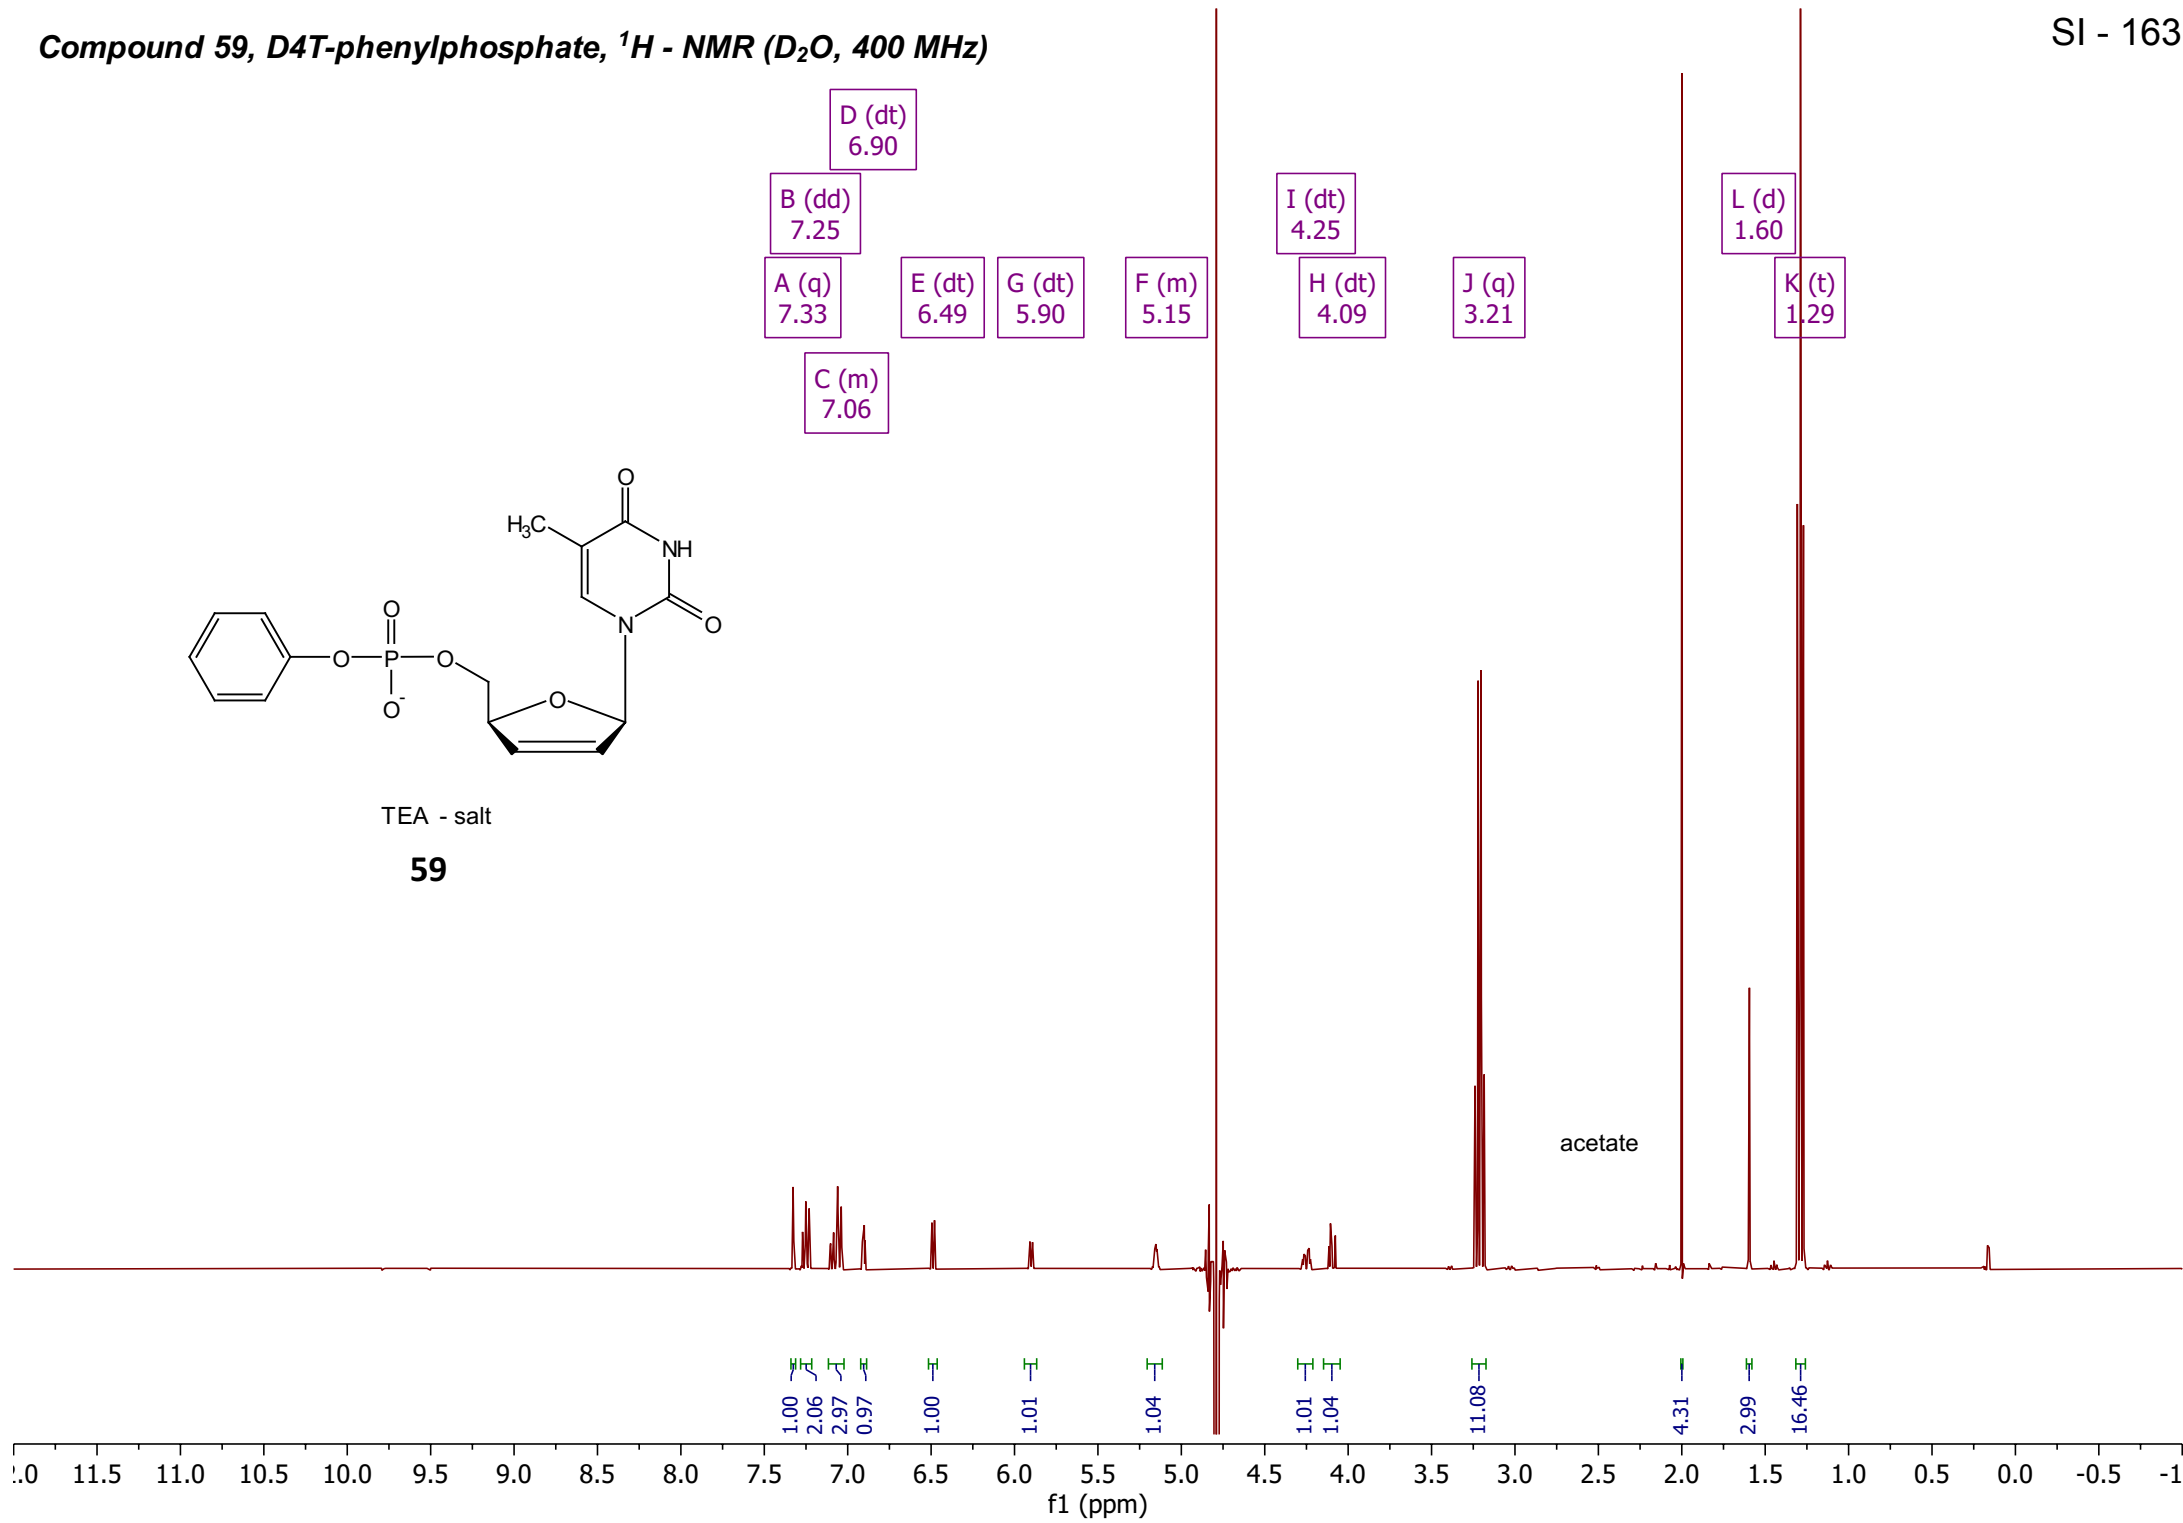

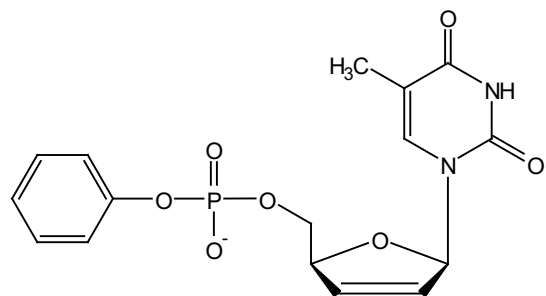

TEA - salt

**59**

A (s)  
-4.85

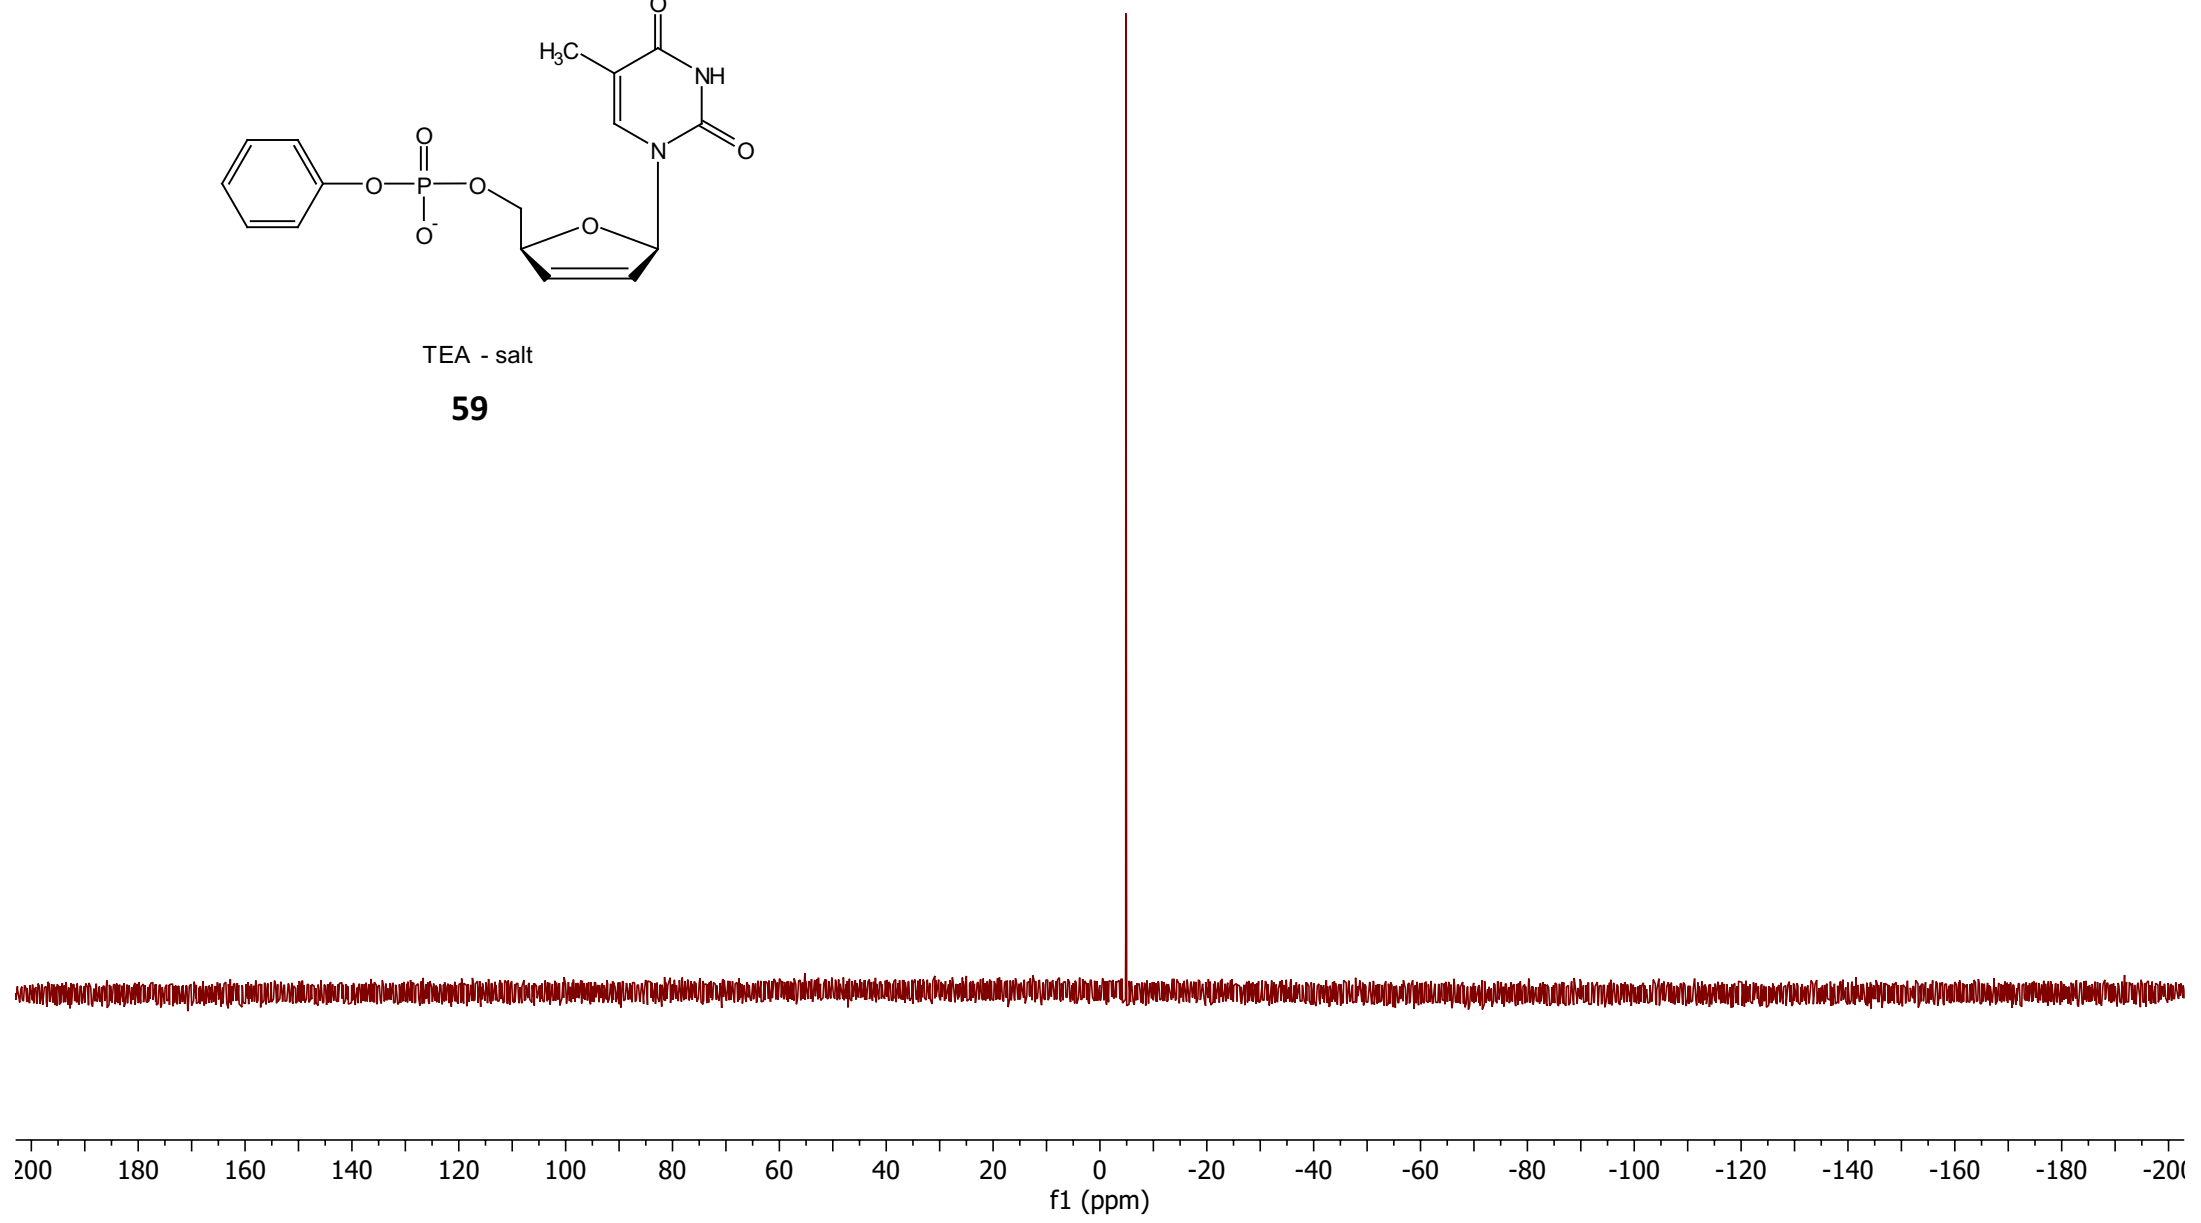

Compound 59, D4T-phenylphosphate,  $^{13}\text{C}$  { $^1\text{H}$ } - NMR ( $\text{D}_2\text{O}$ , 101 MHz)

SI - 165

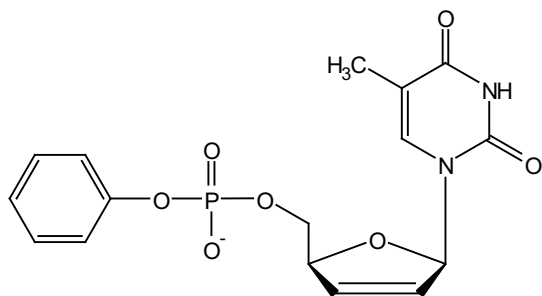

TEA - salt

**59**

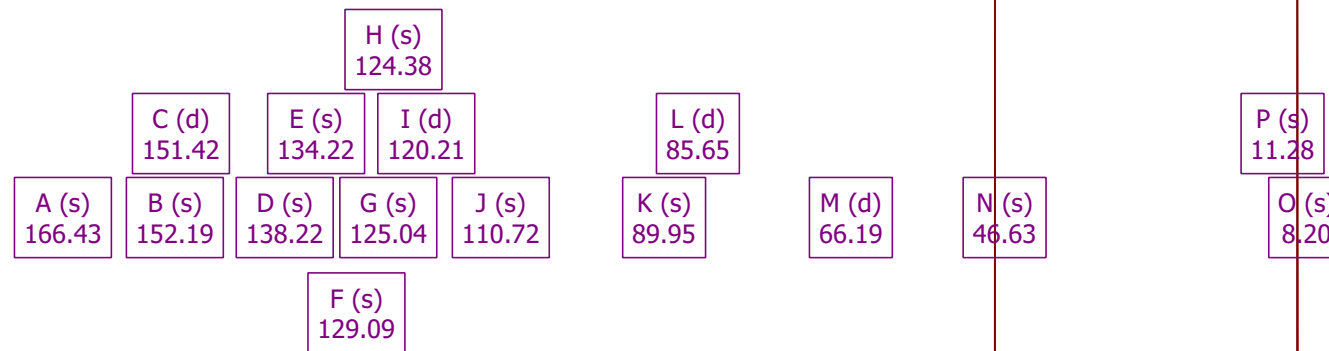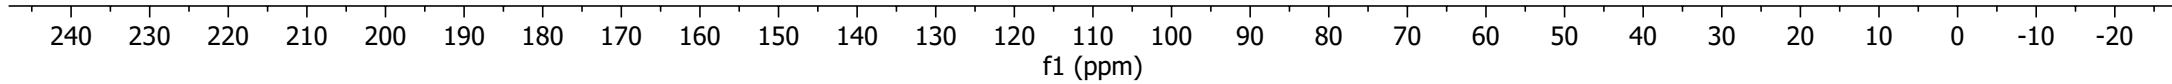



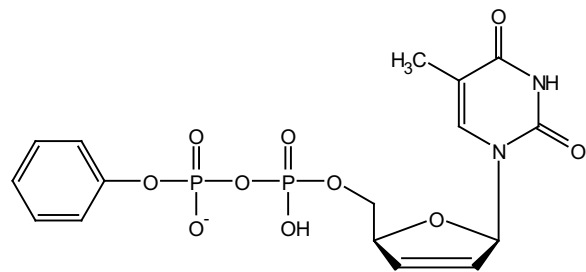

TEA - salt

**60**

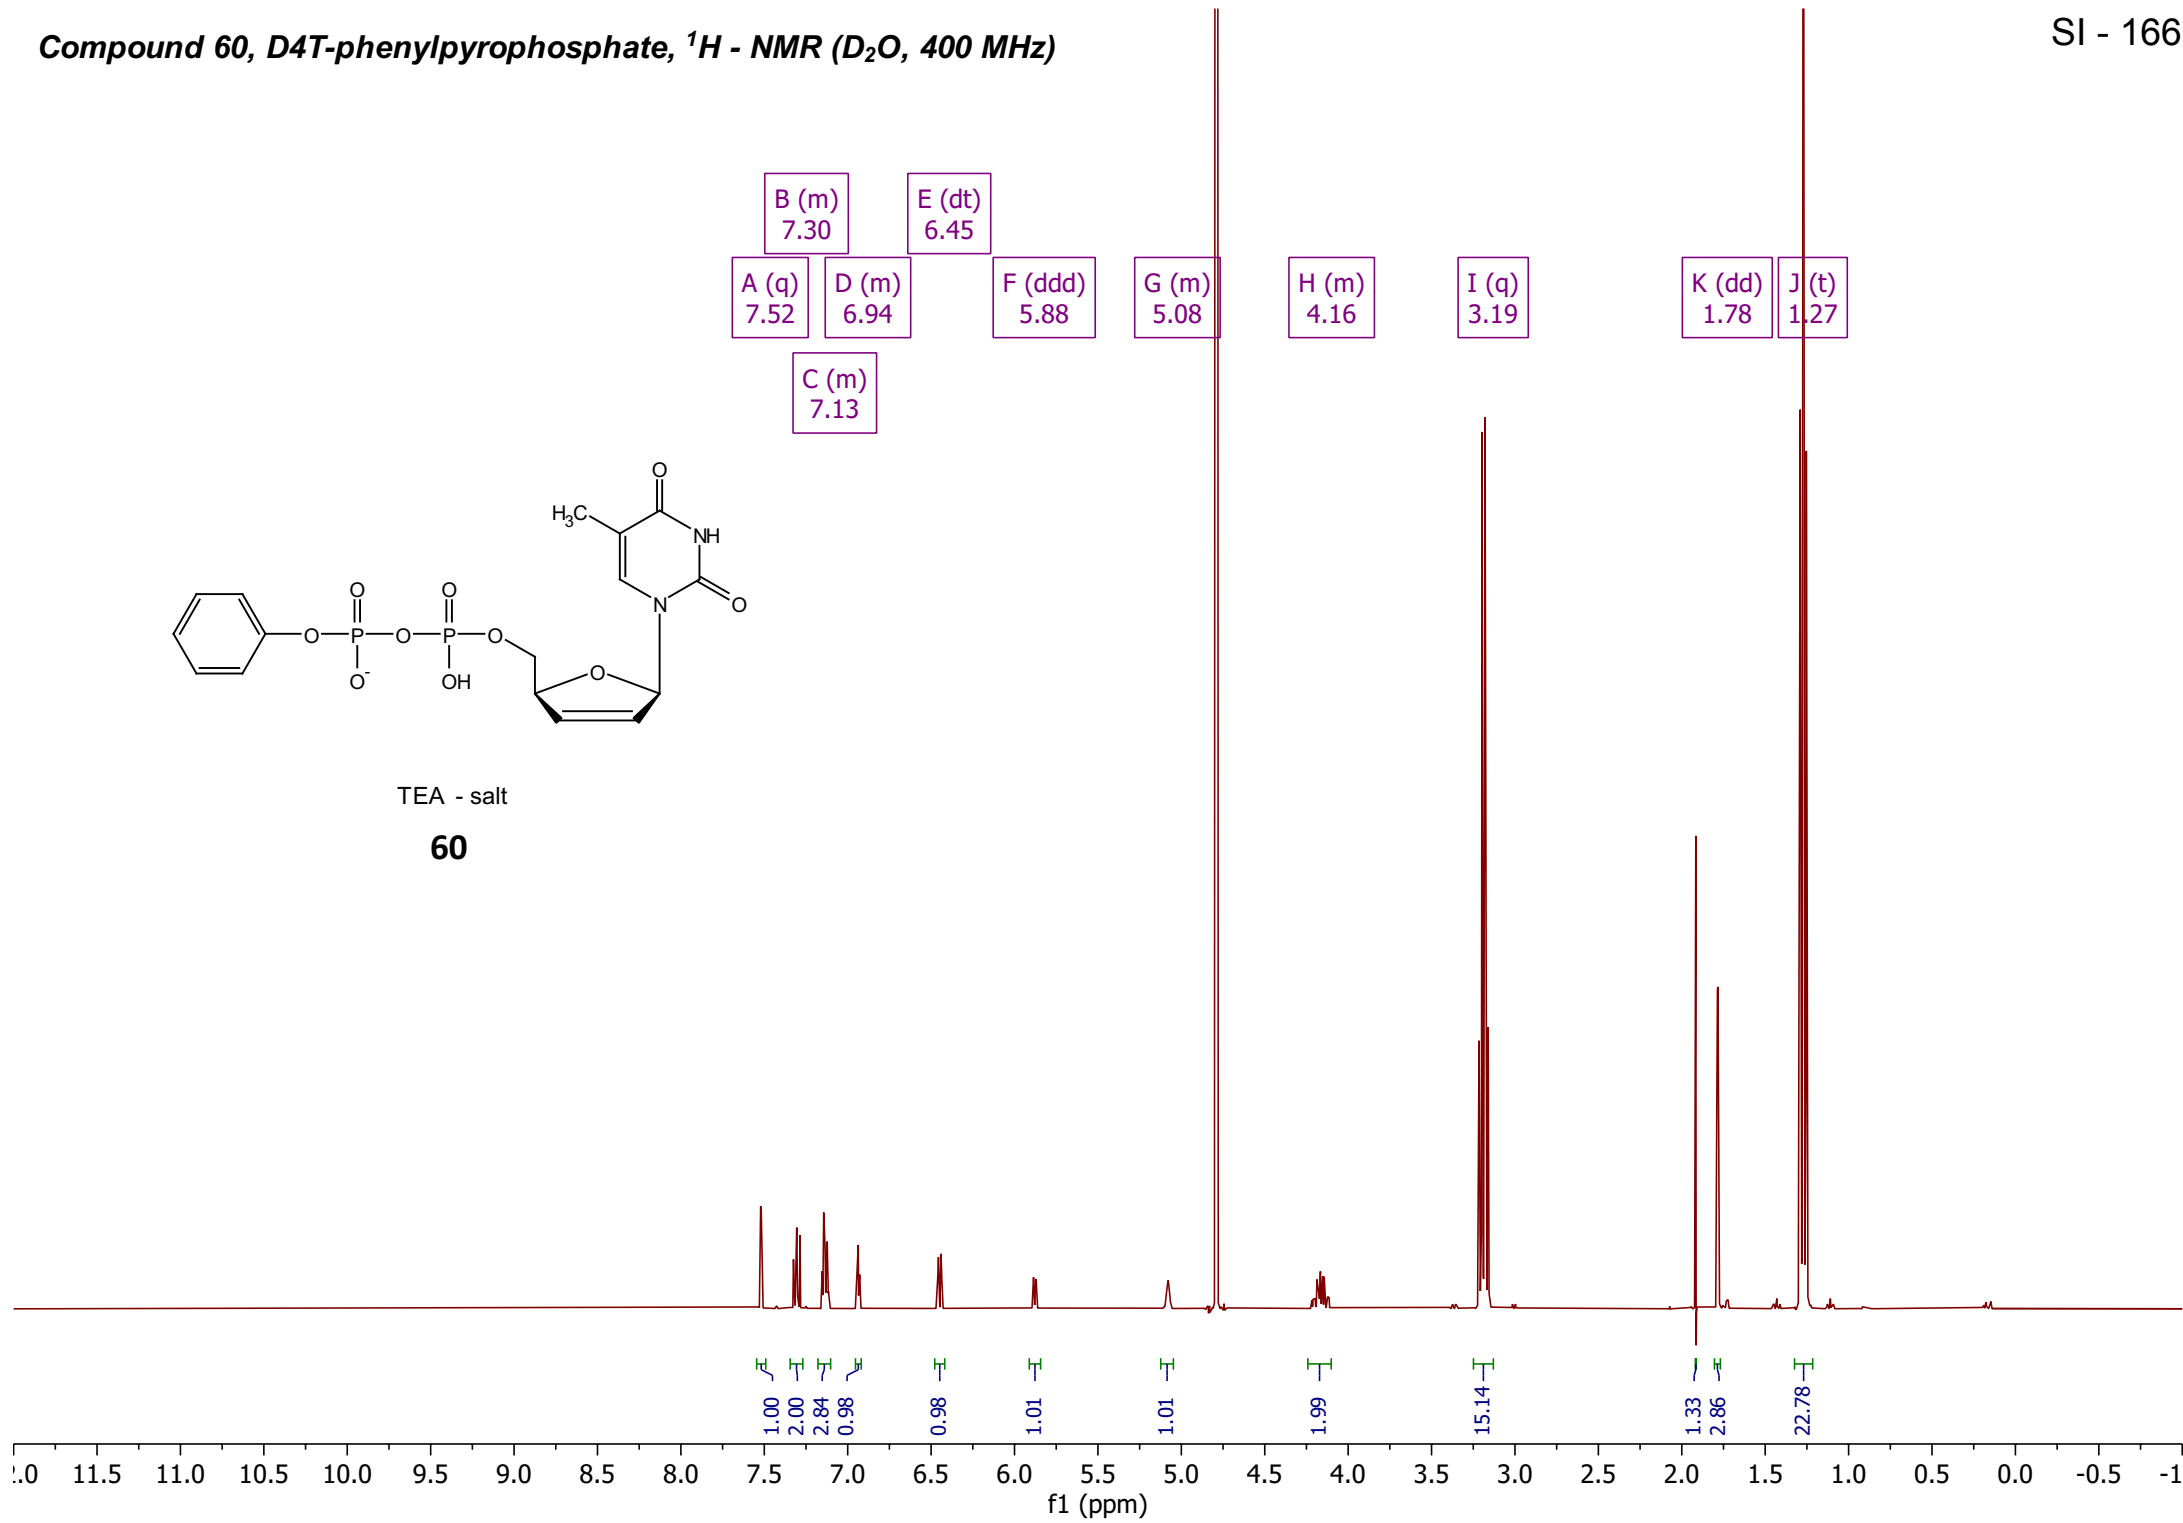

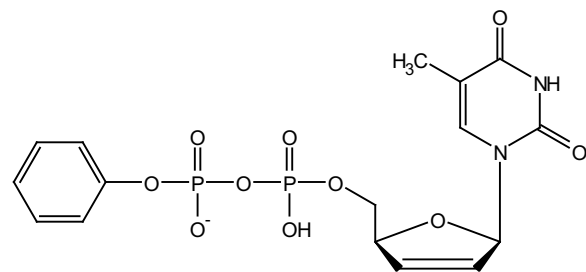

TEA - salt

**60**

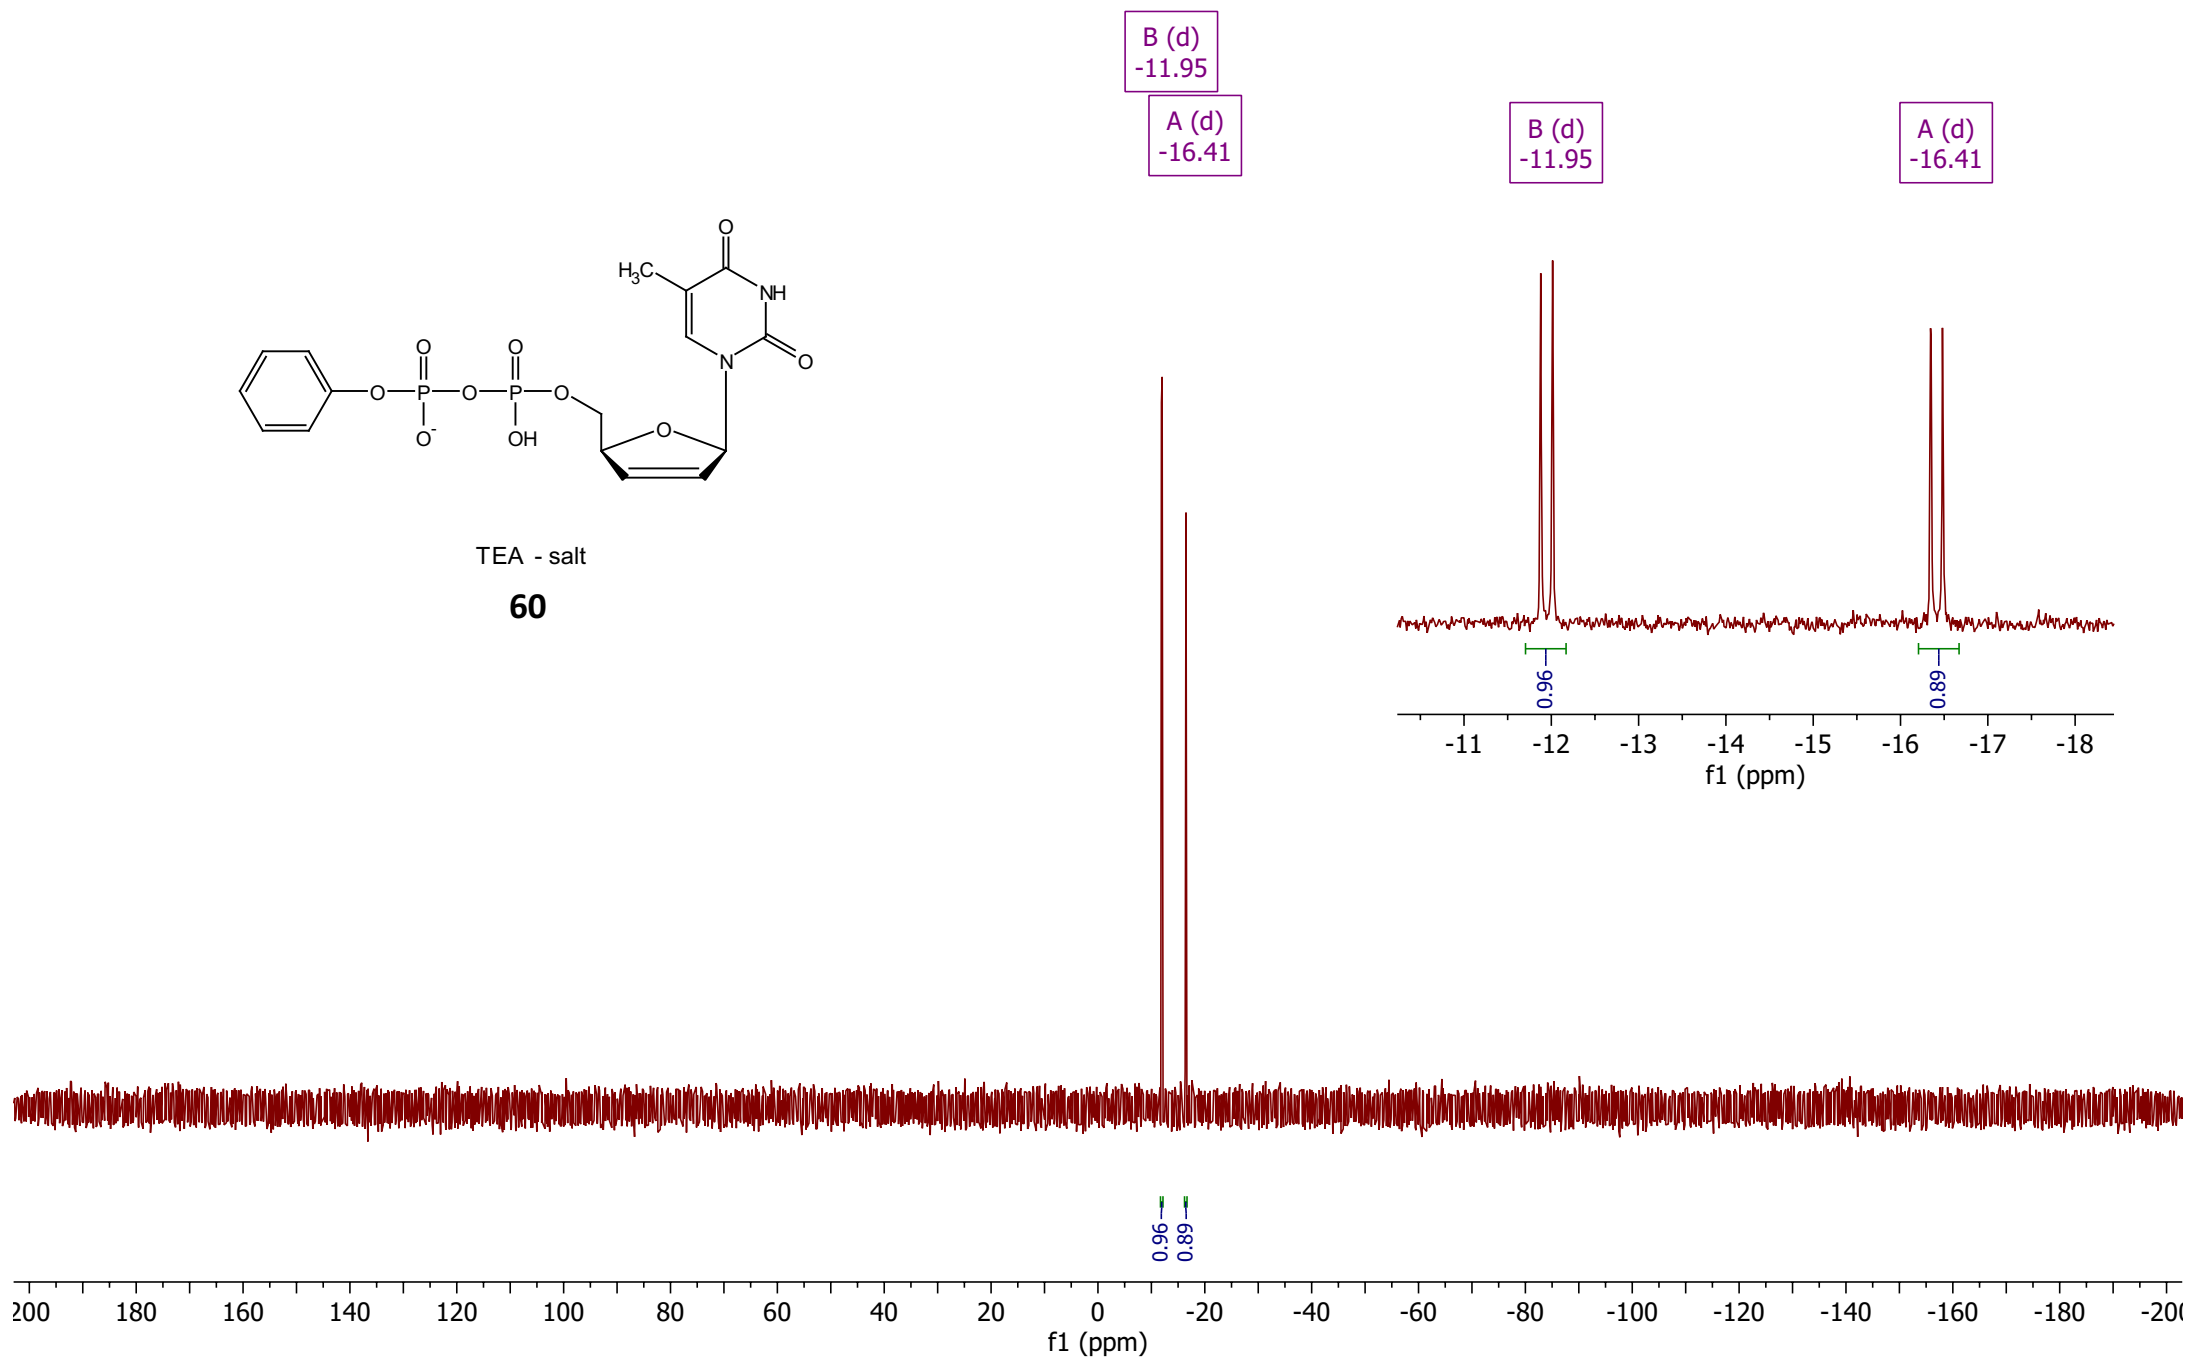

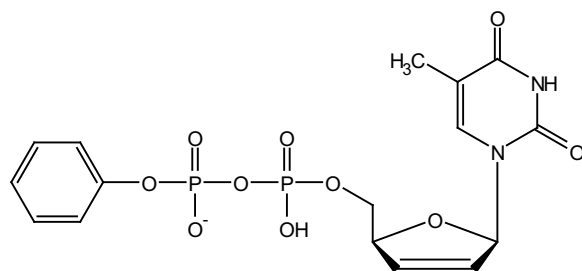

TEA - salt

**60**

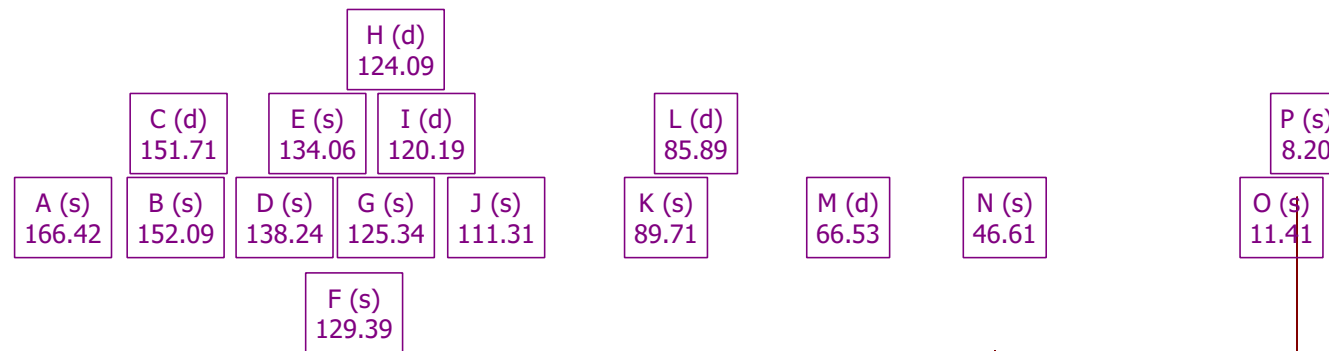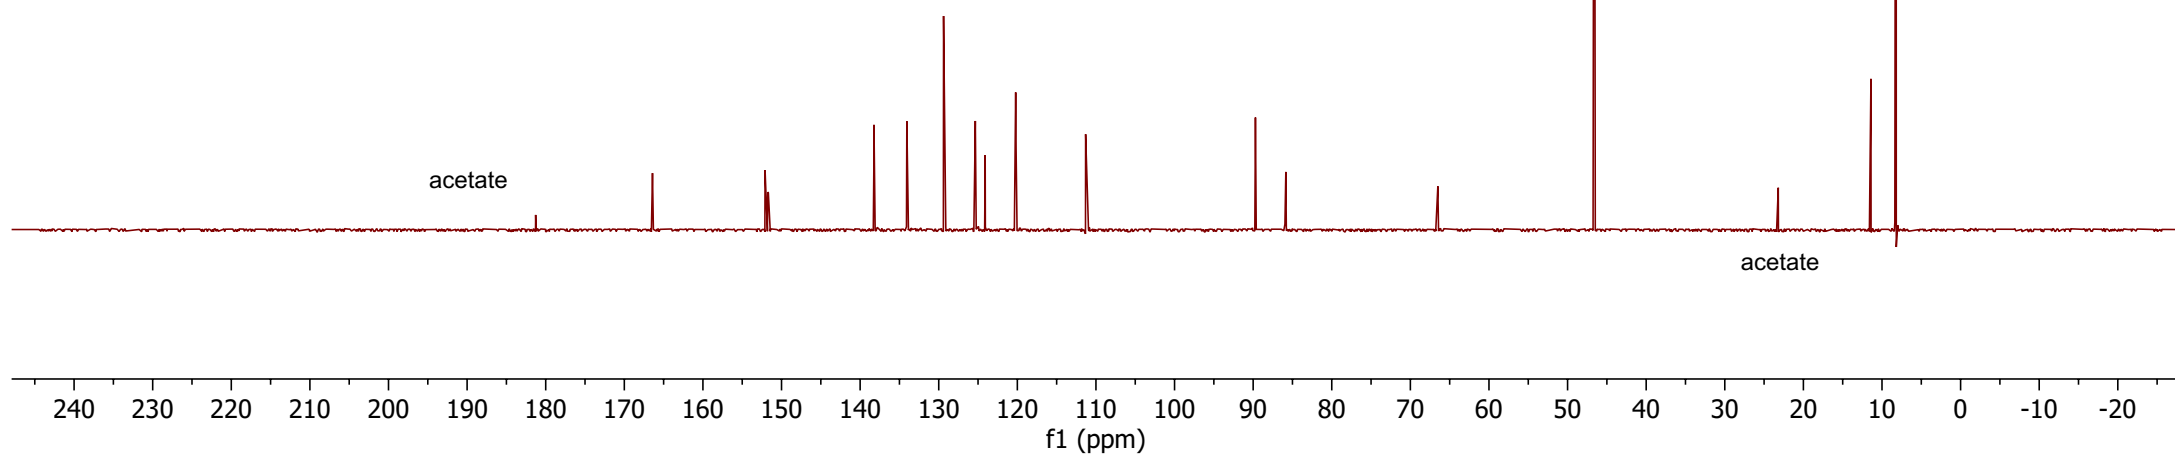

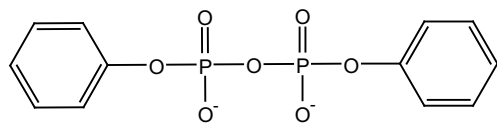

TBA / TEA - salt

**61**

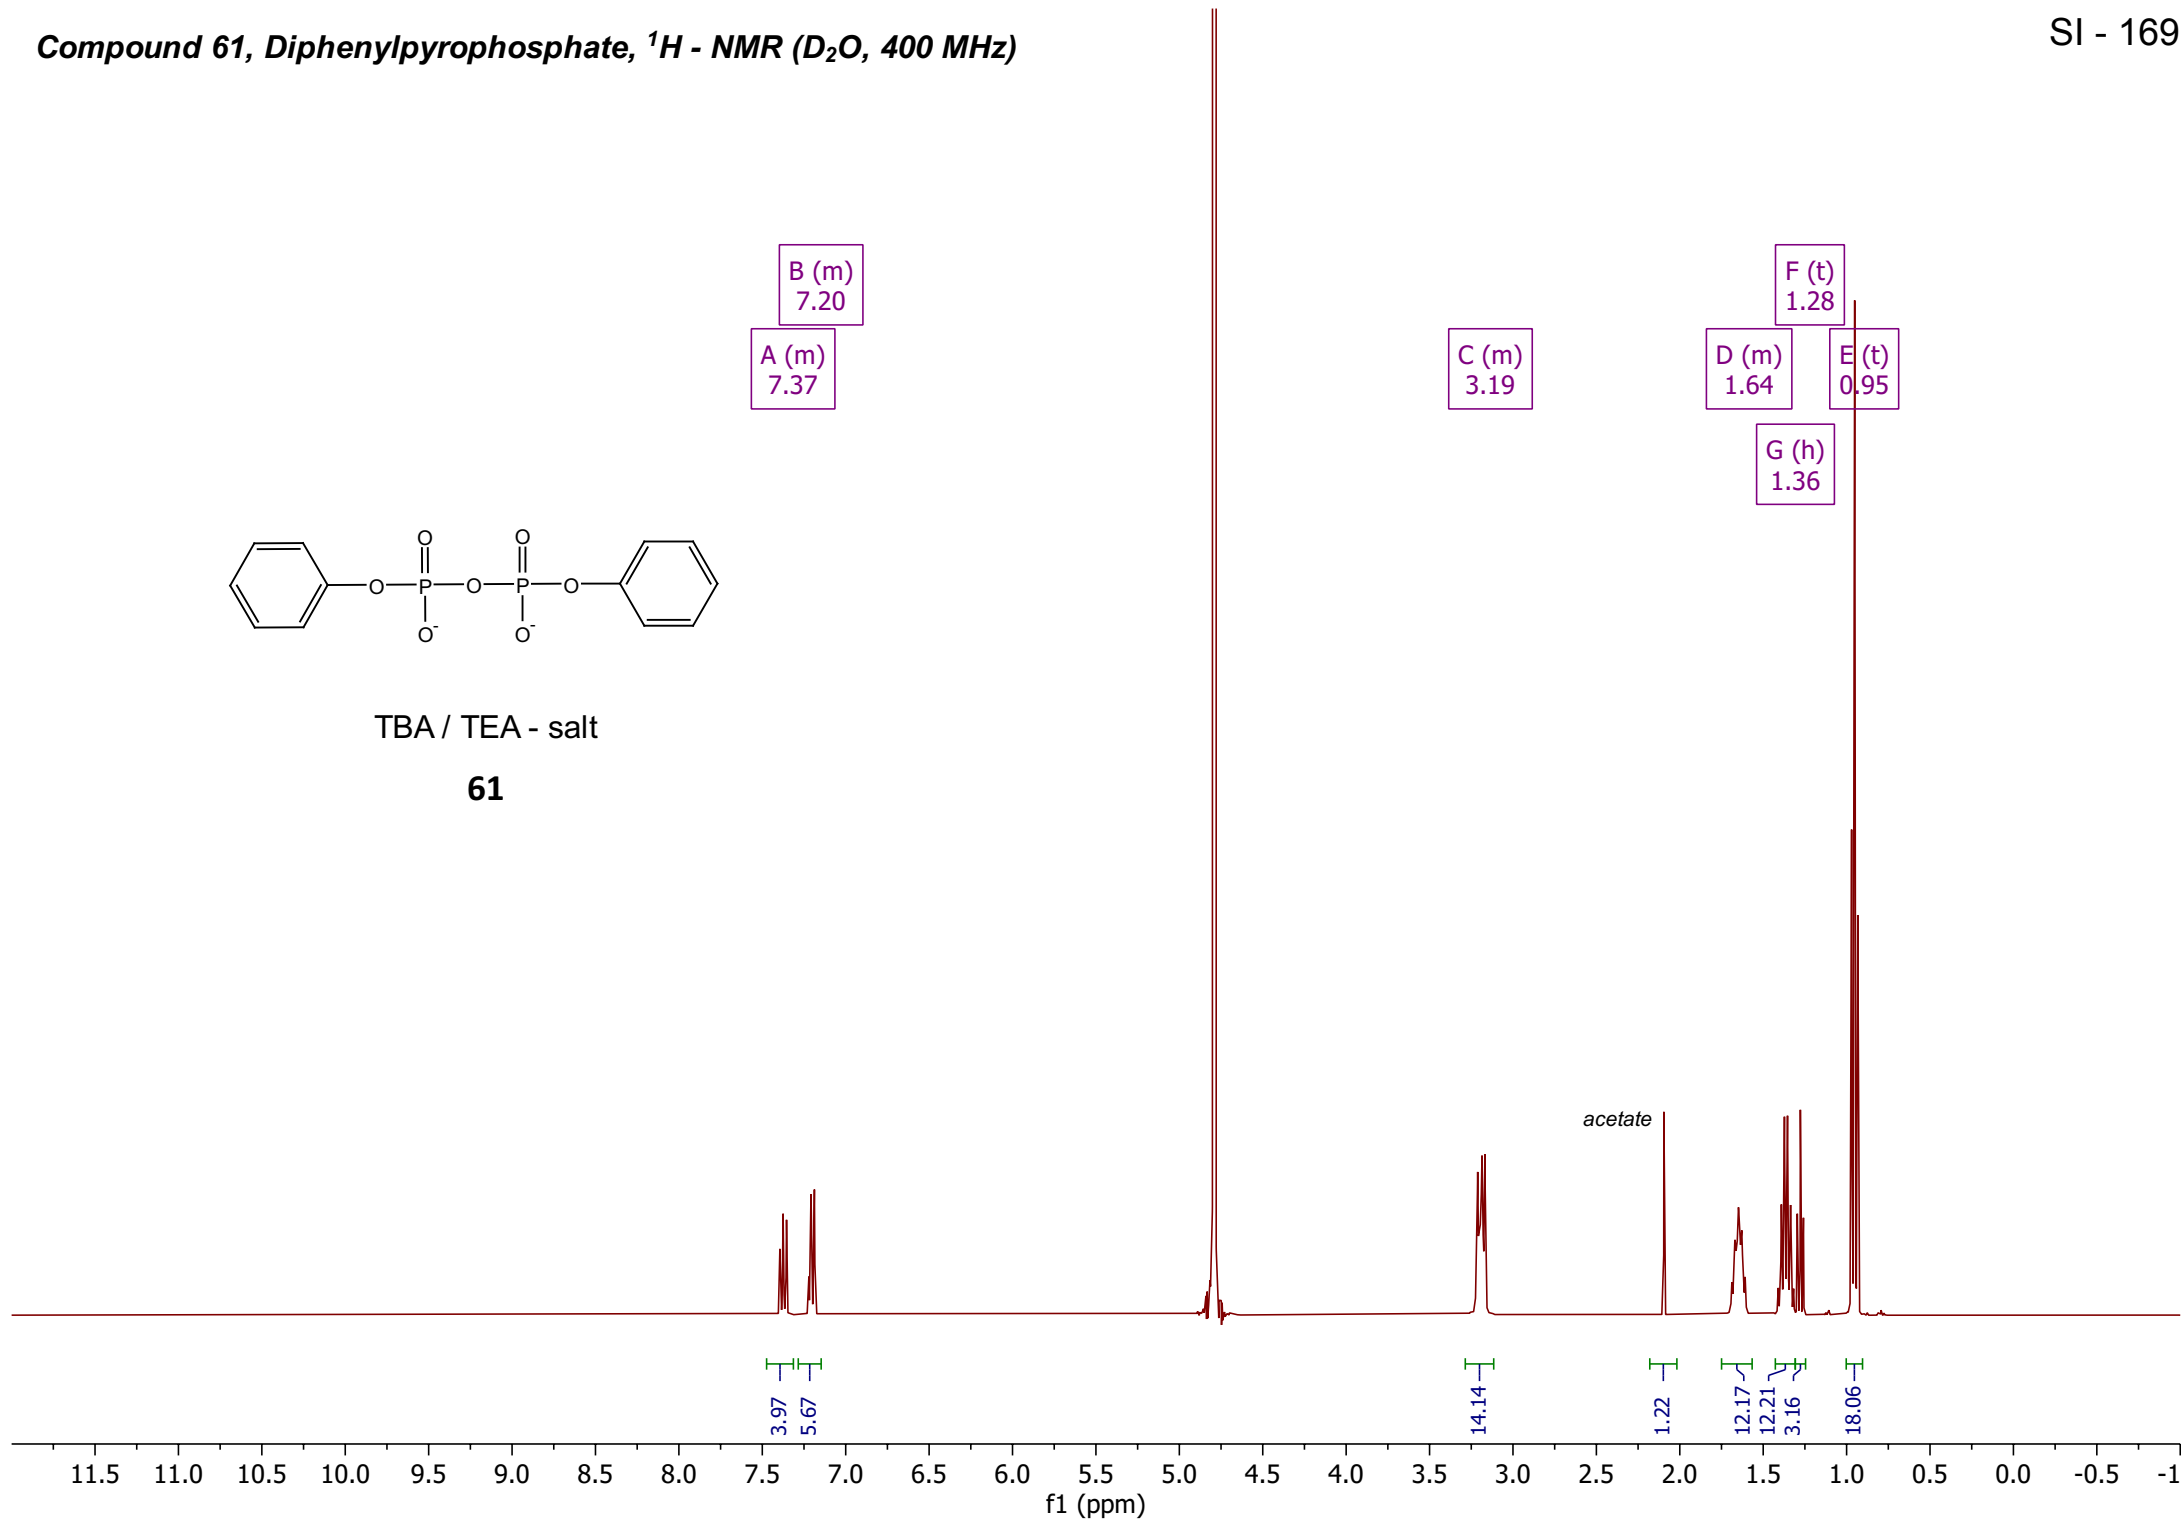

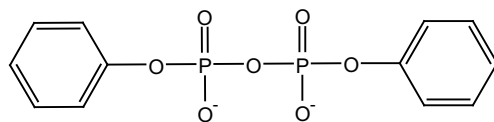

TBA / TEA - salt

**61**

A (s)  
-16.13

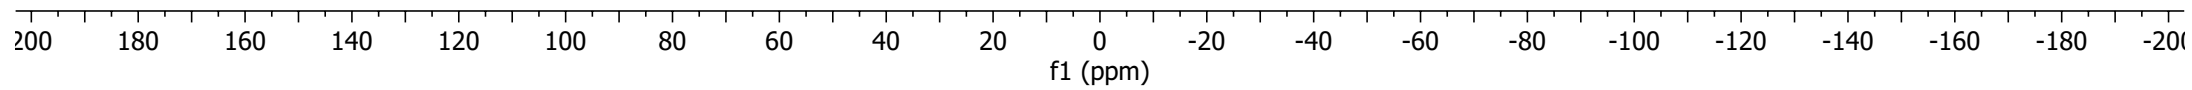

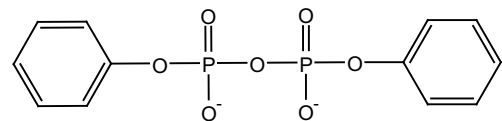

TBA / TEA - salt

**61**

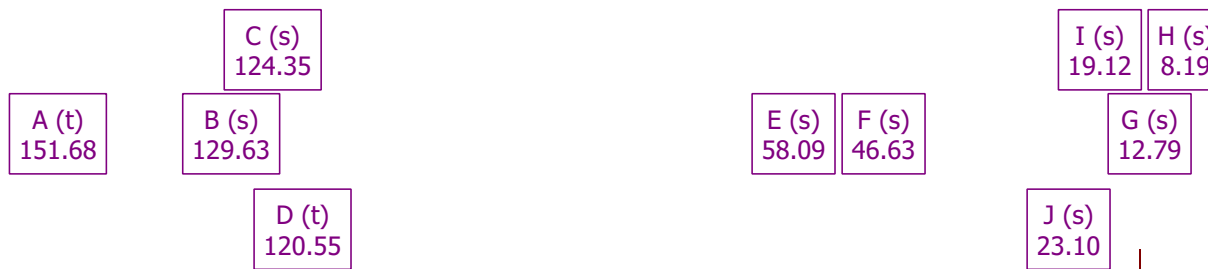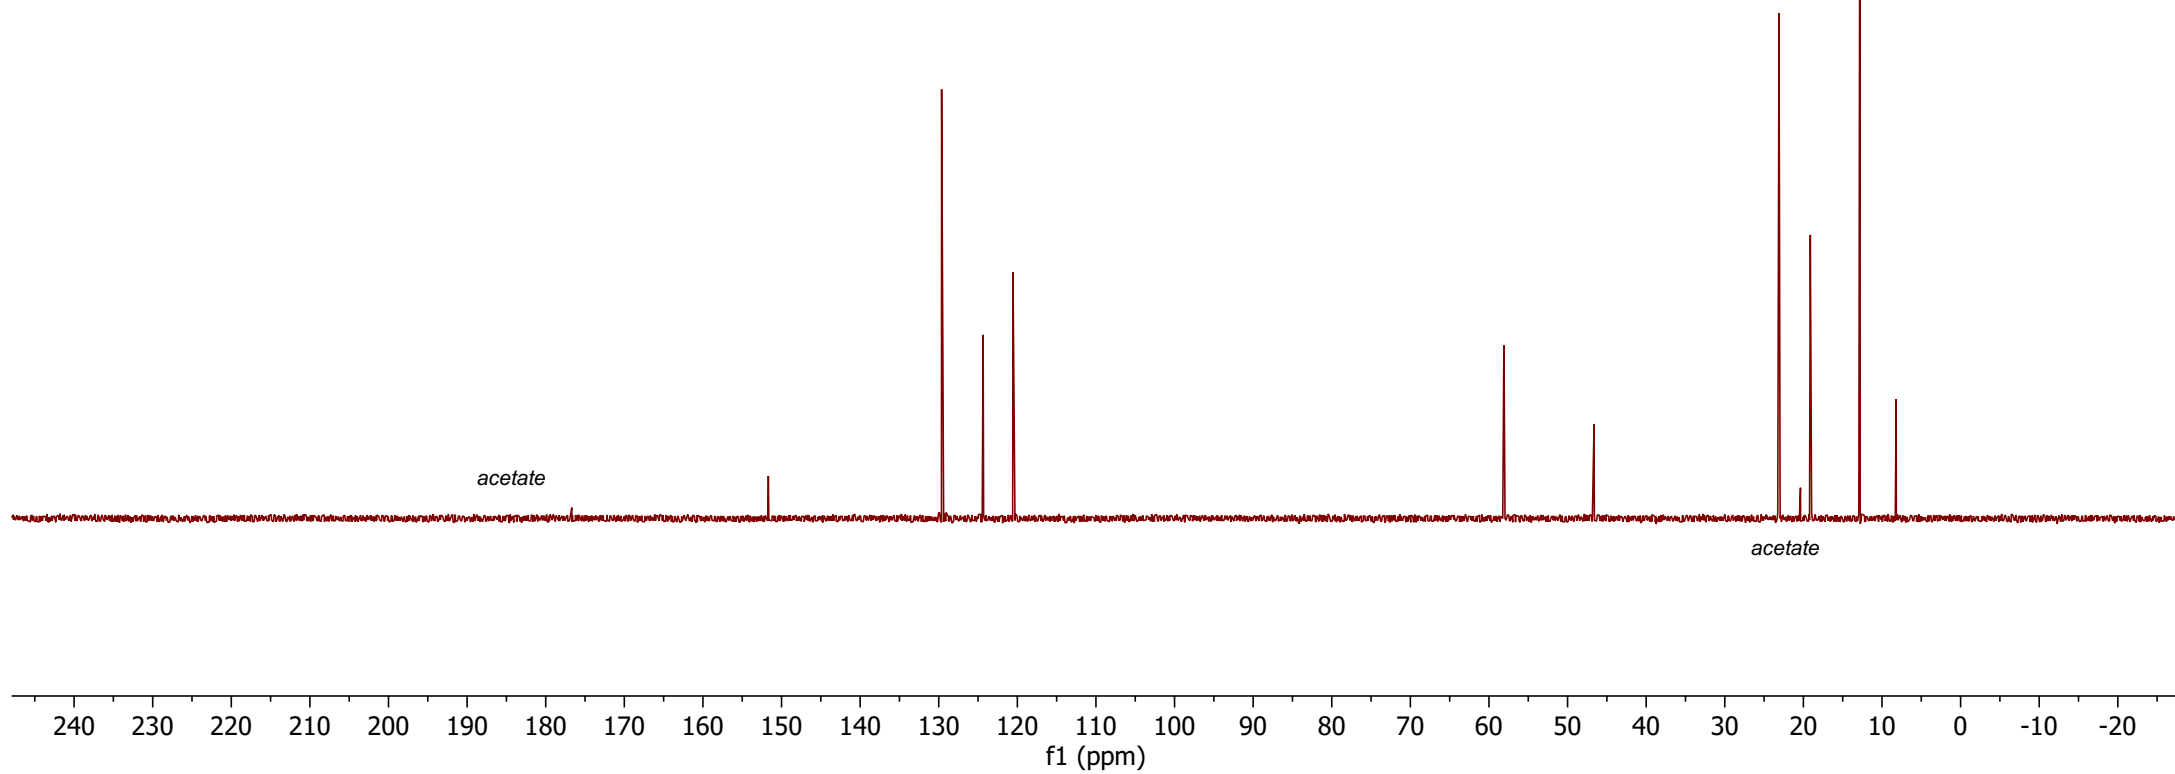

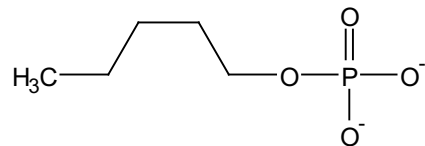

TBA/TEA - salt

**67**

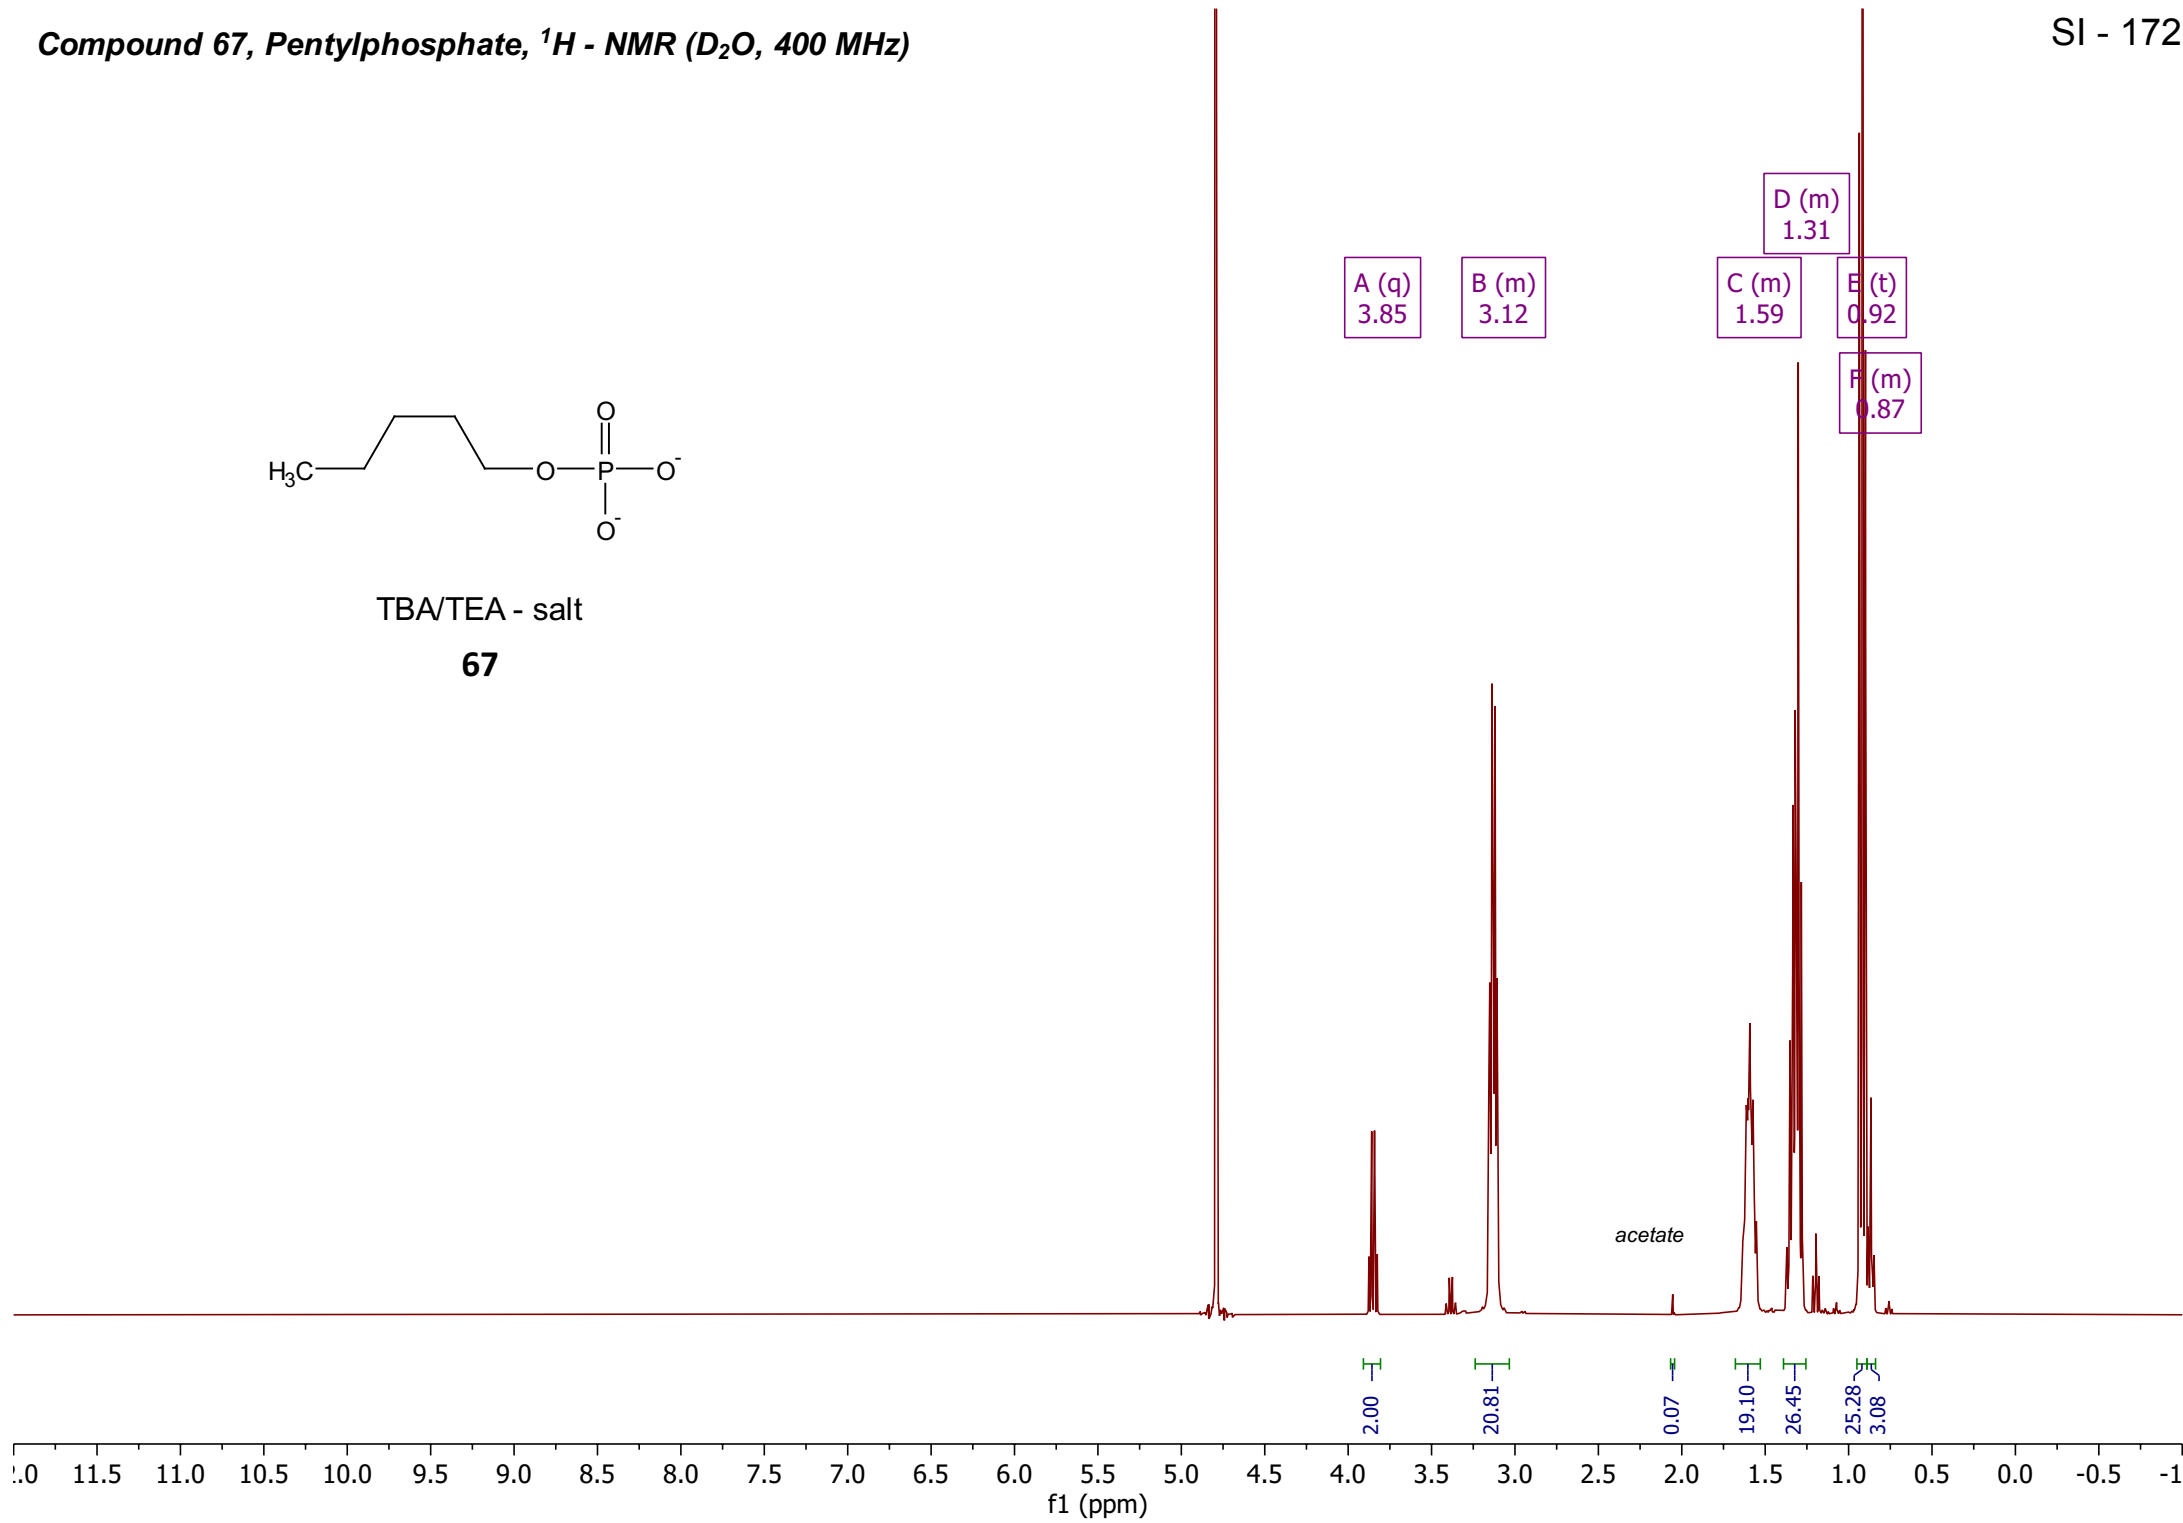

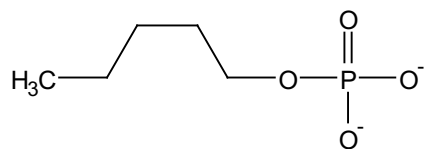

TBA/TEA - salt

**67**

A (s)  
0.46

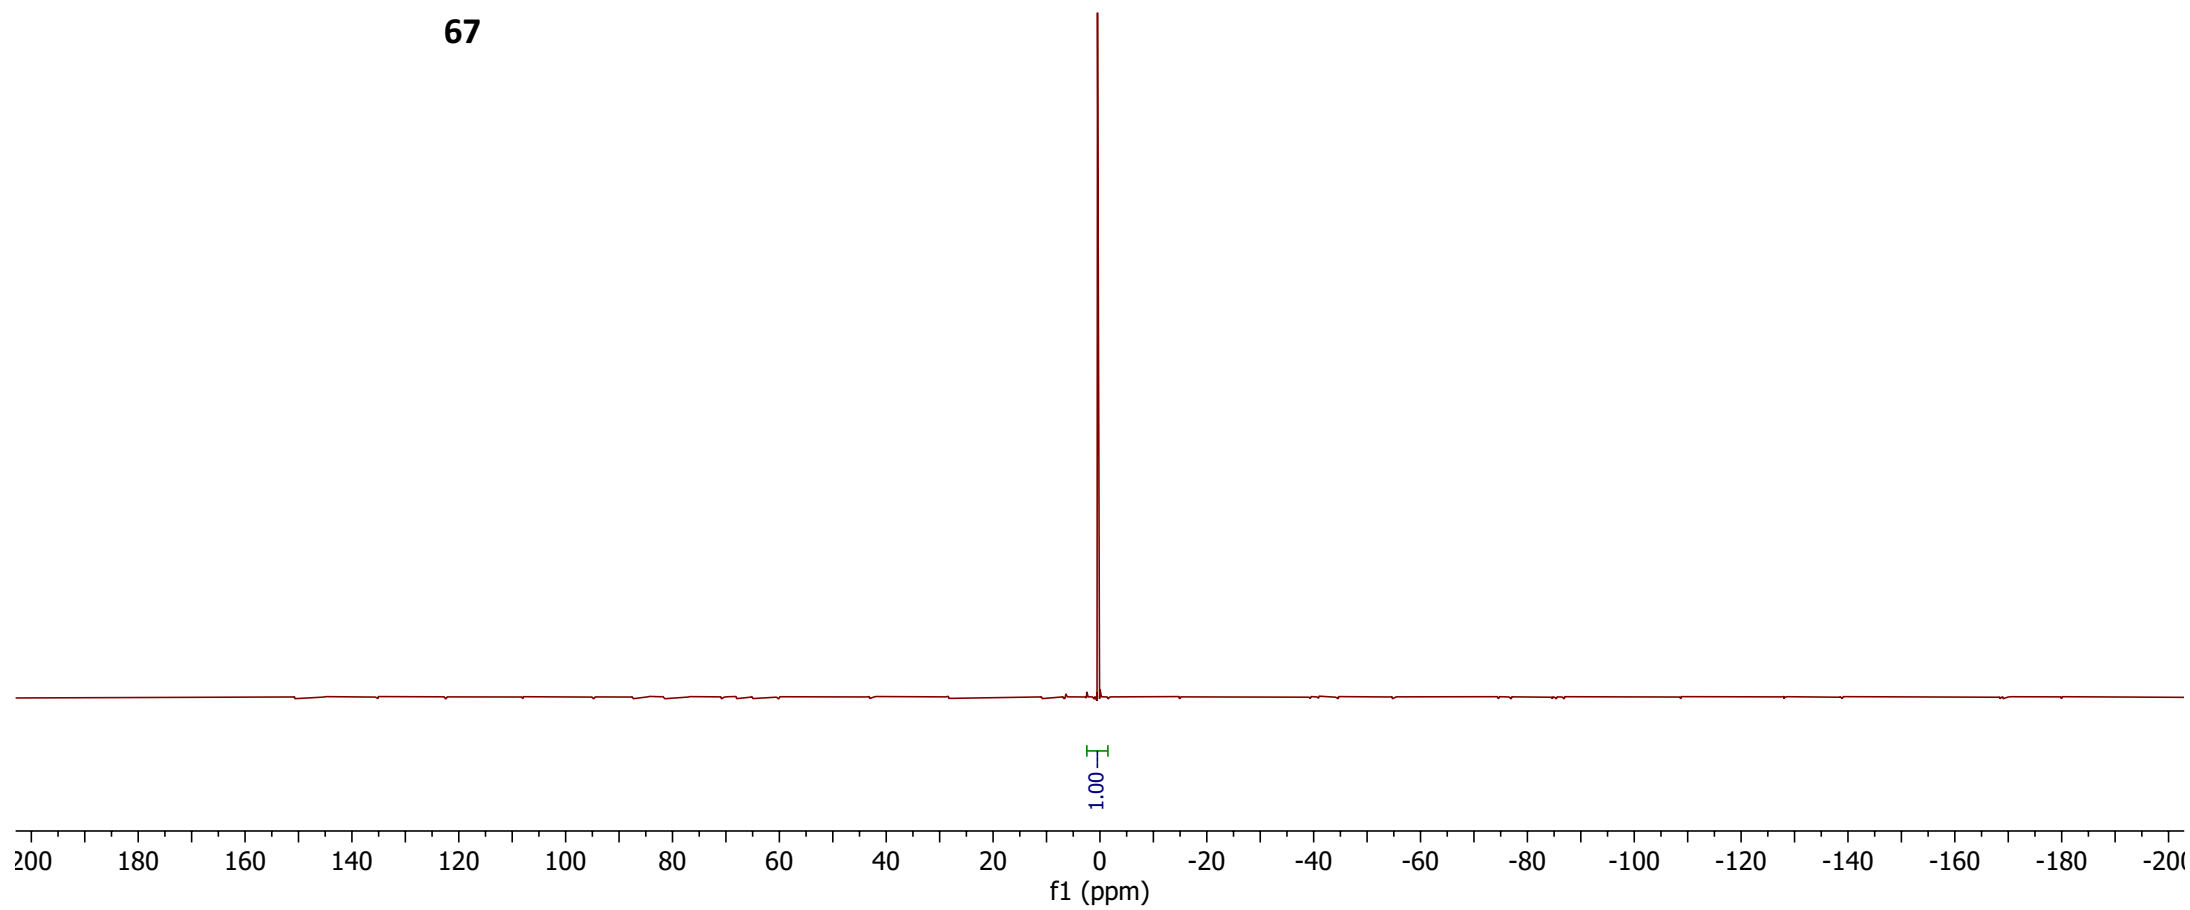



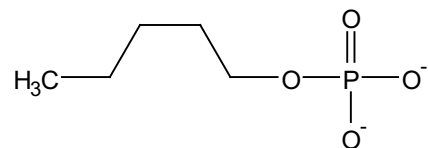

TBA/TEA - salt

**67**

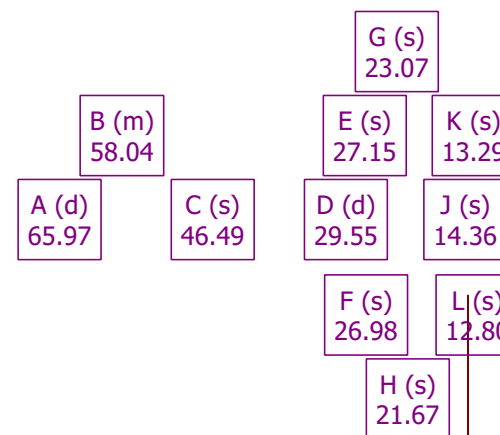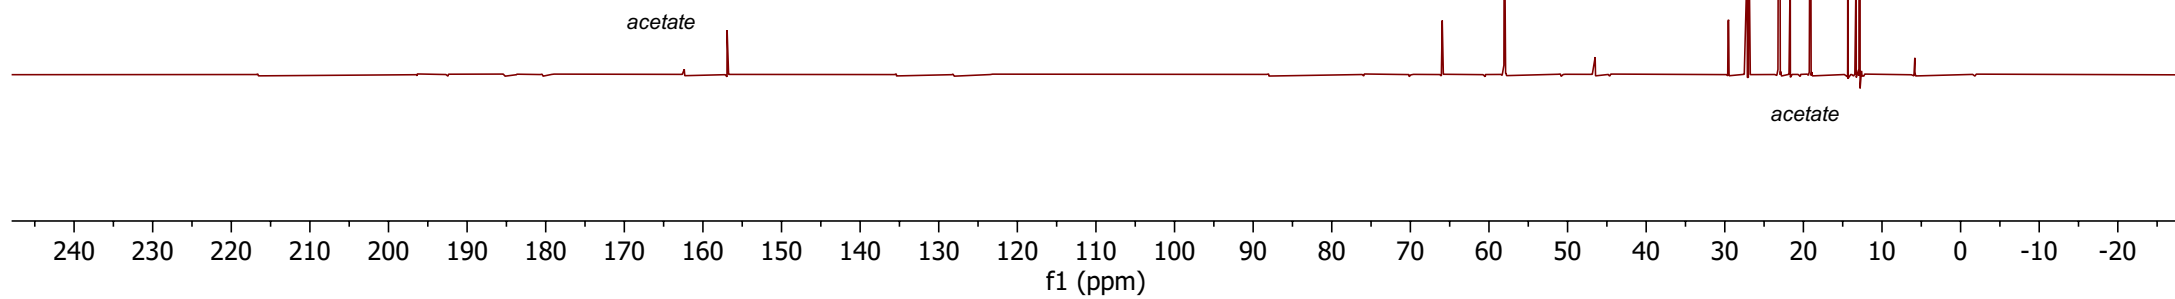

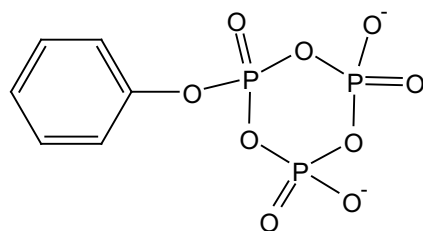

73

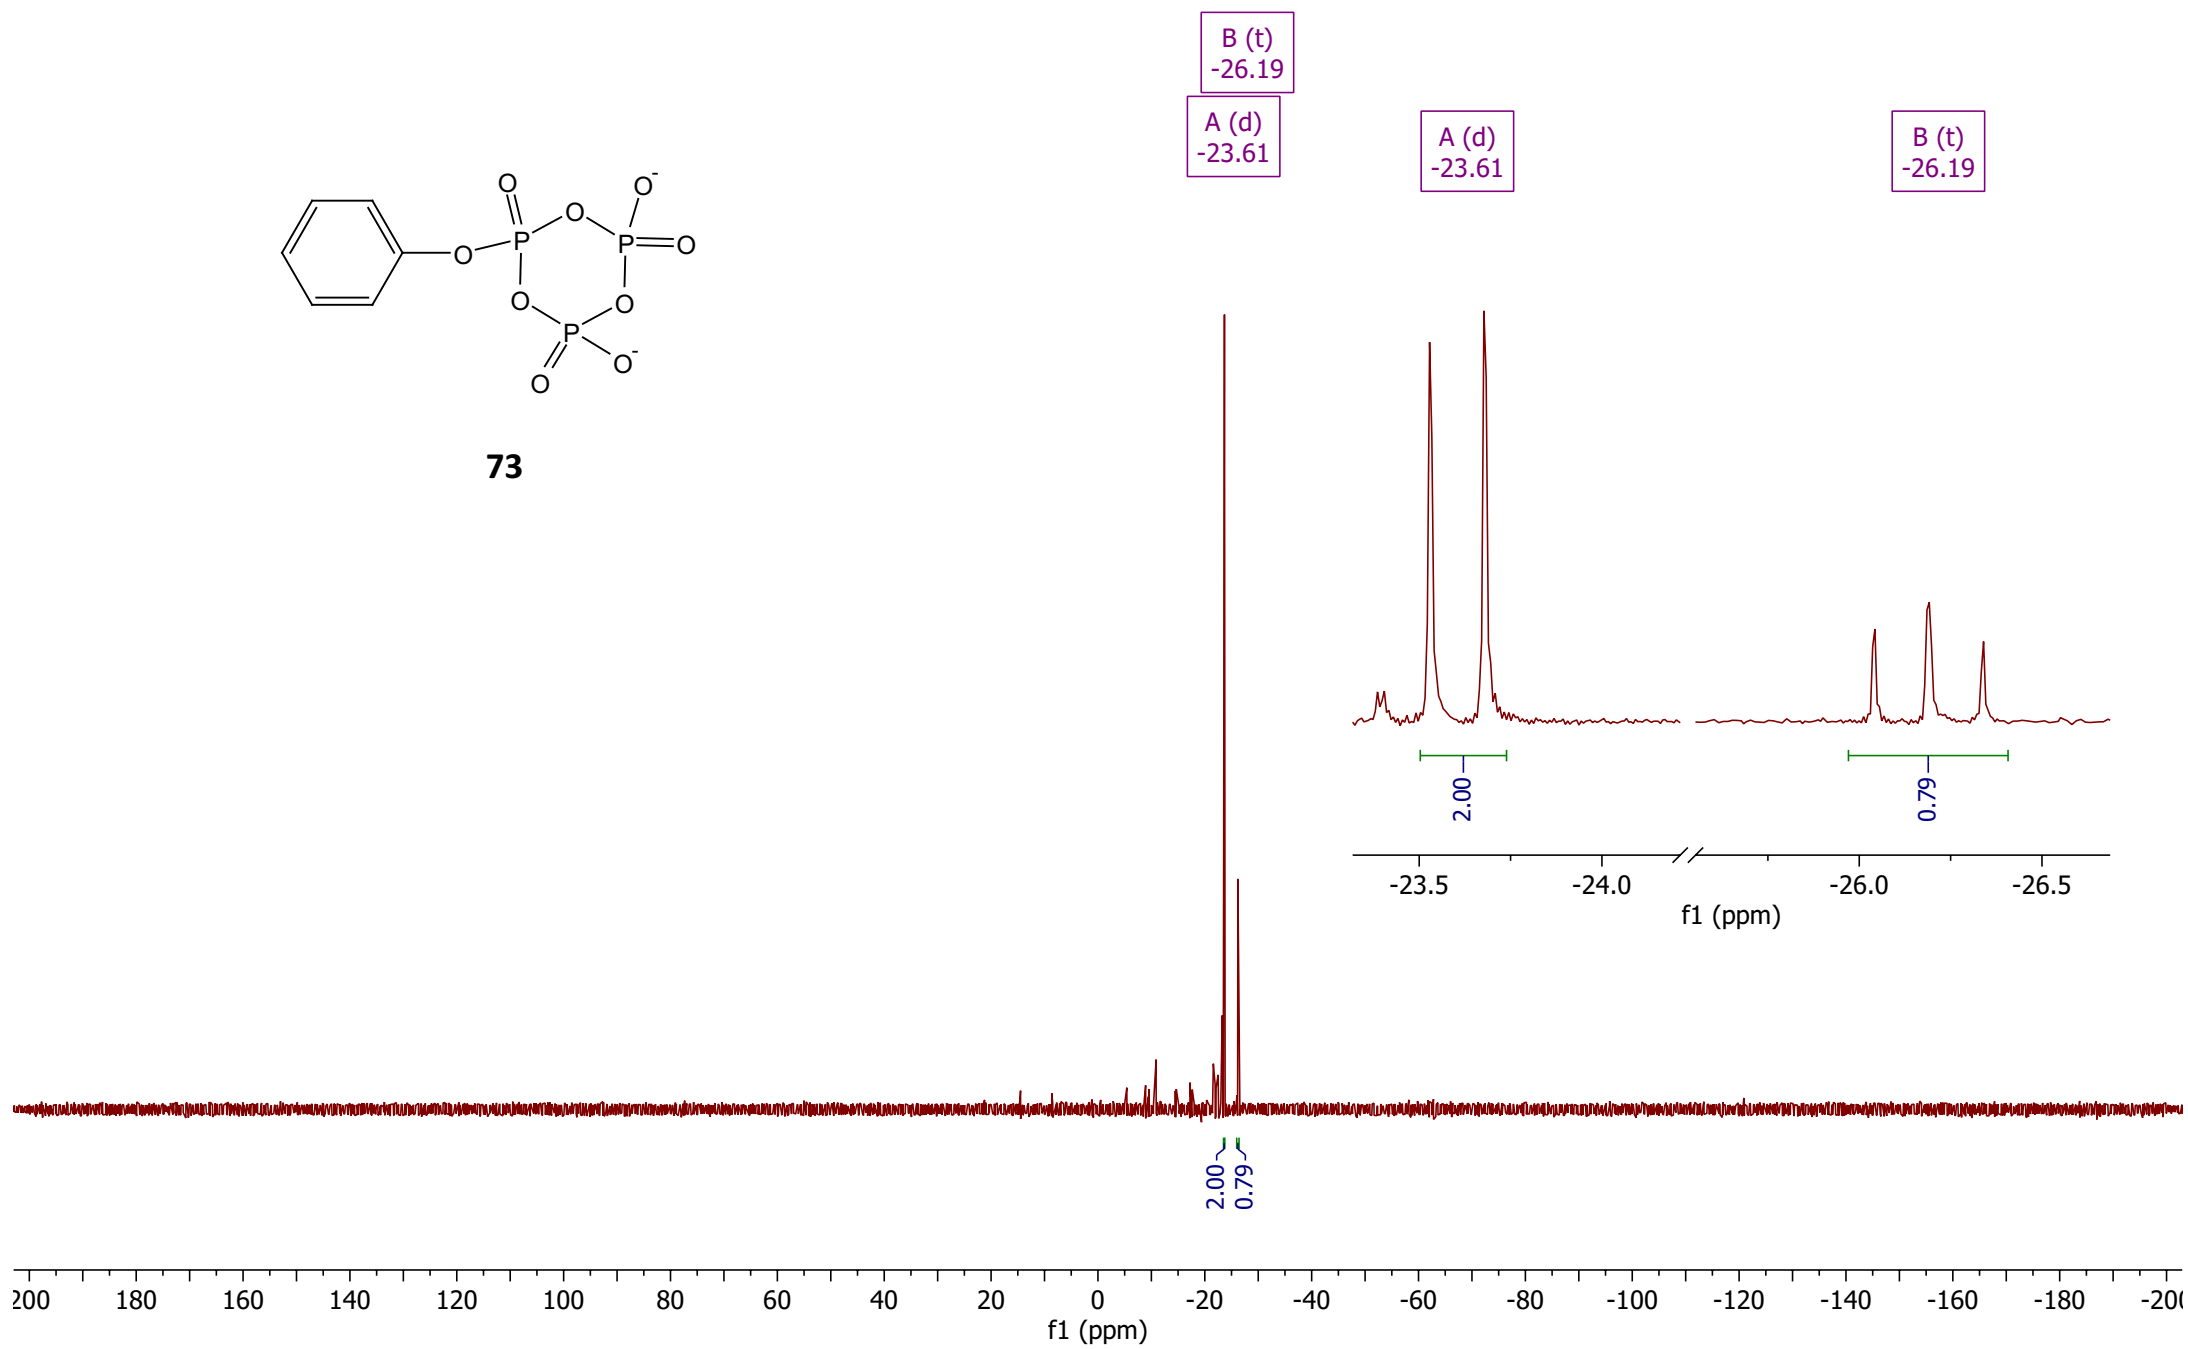

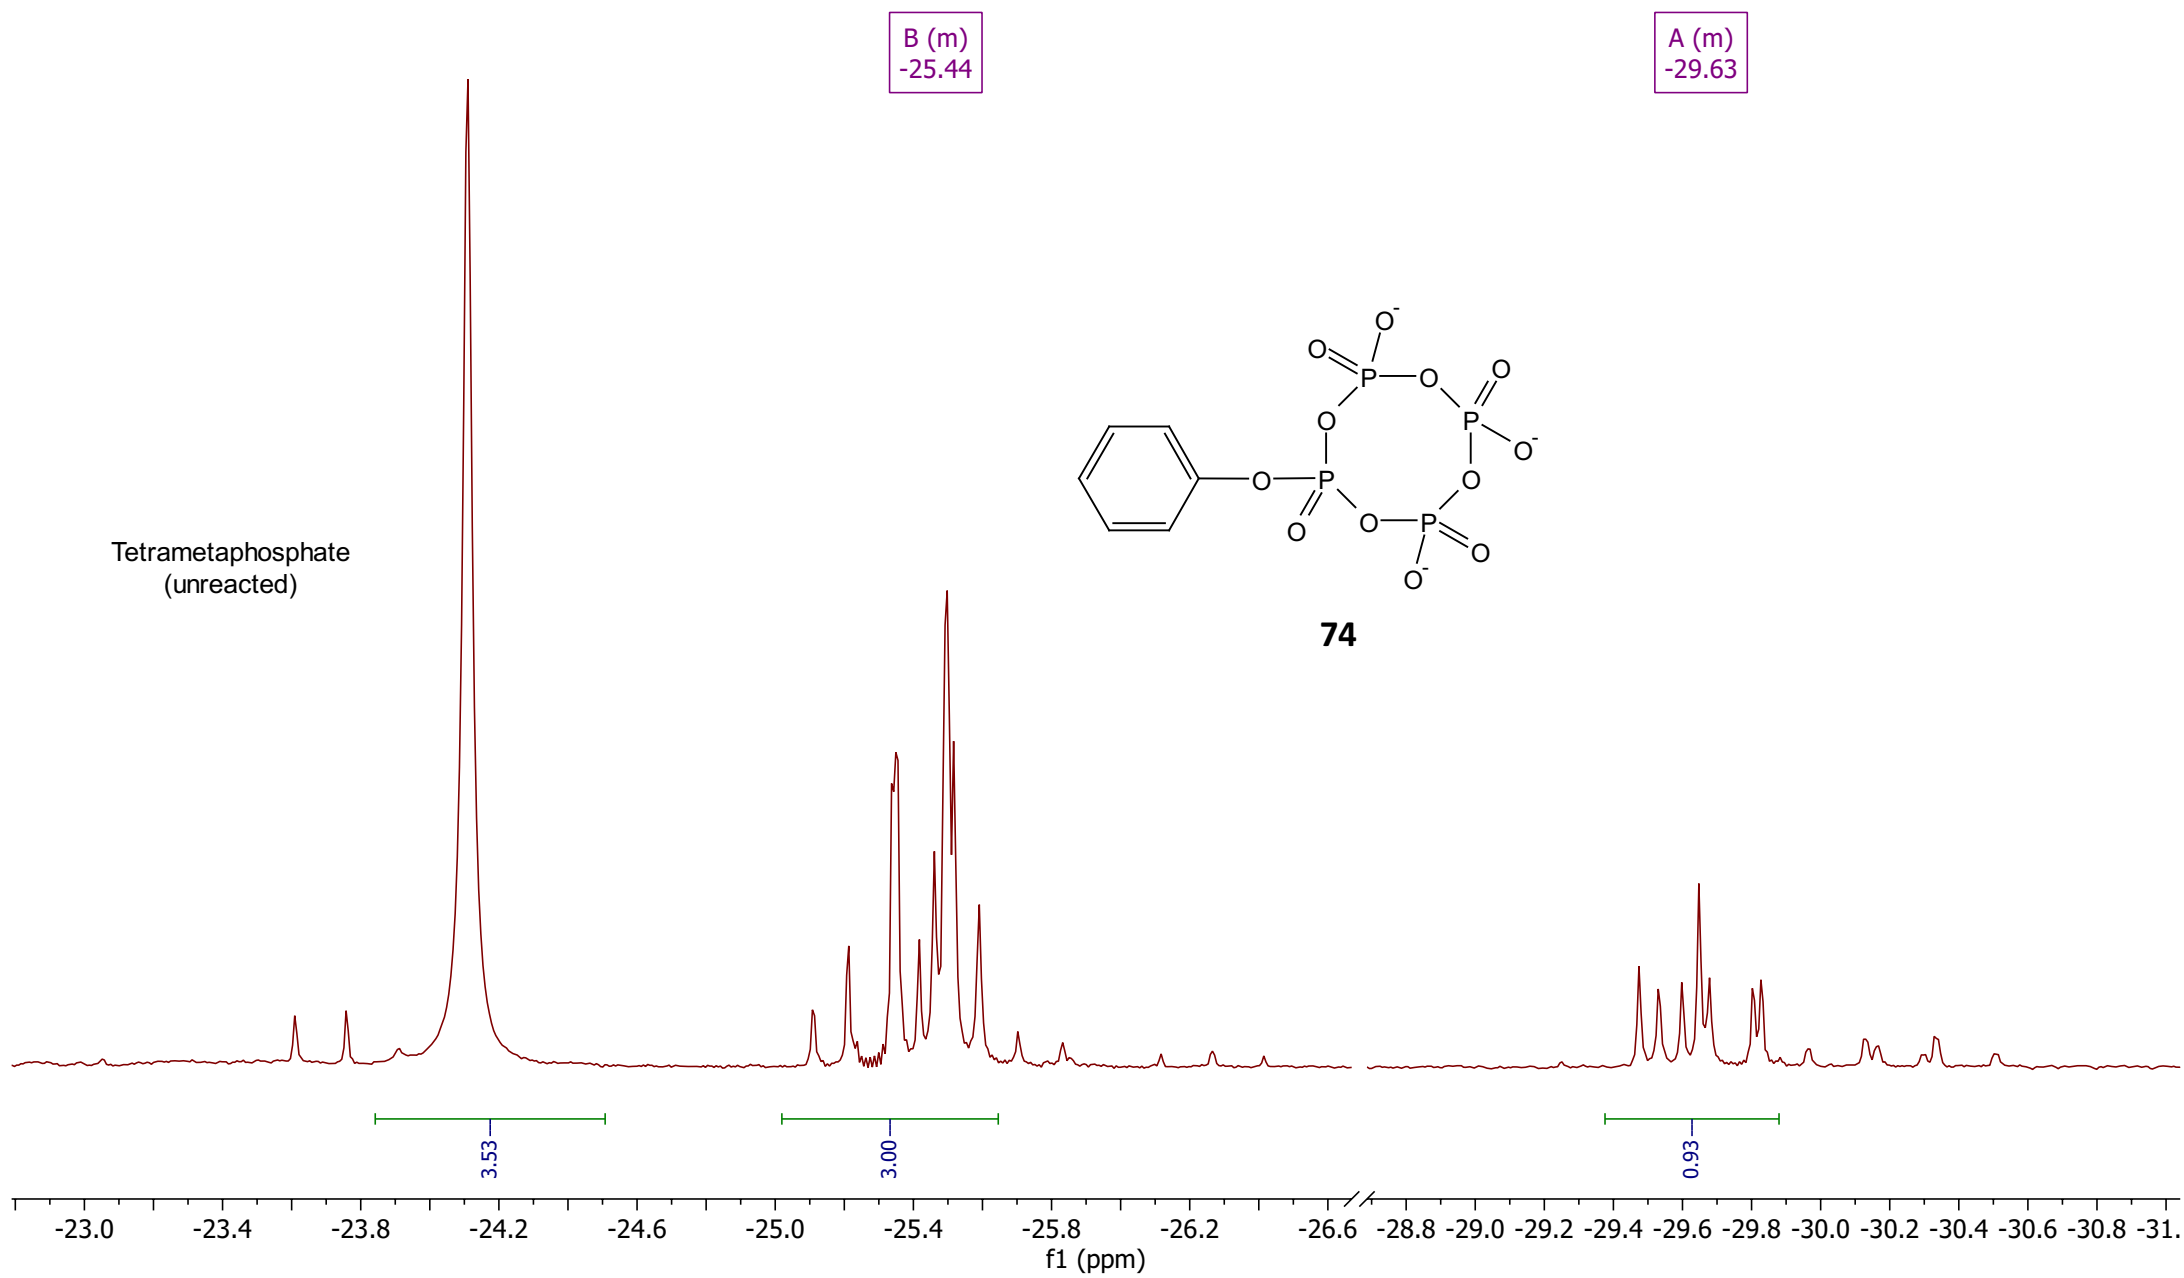

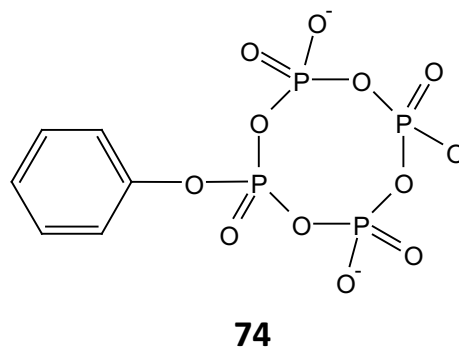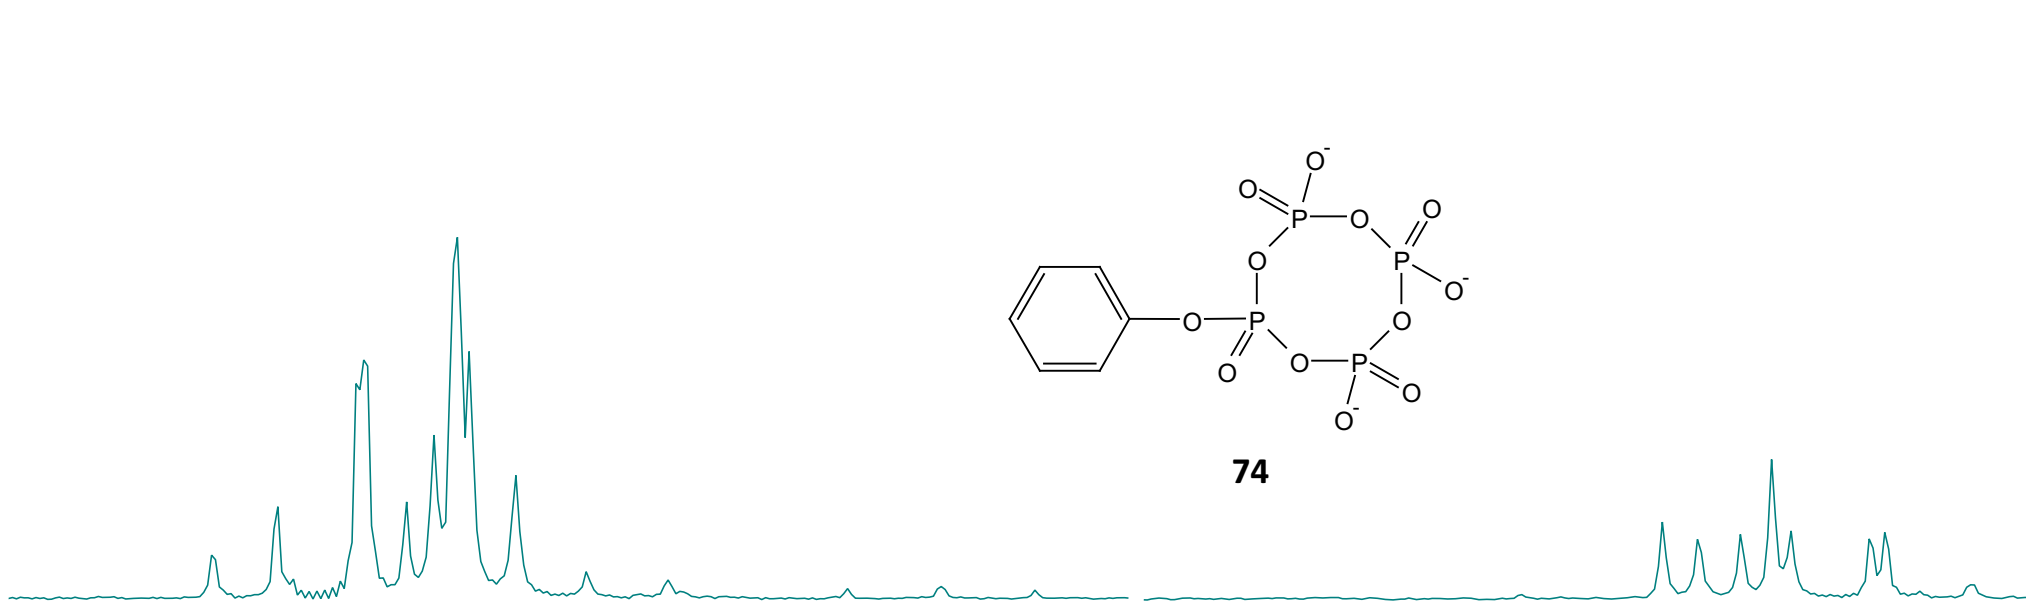

Compound 74, Phenylcyclotetraphosphate,  $^{31}\text{P}$  { $^1\text{H}$ } - NMR (spinsimulator)

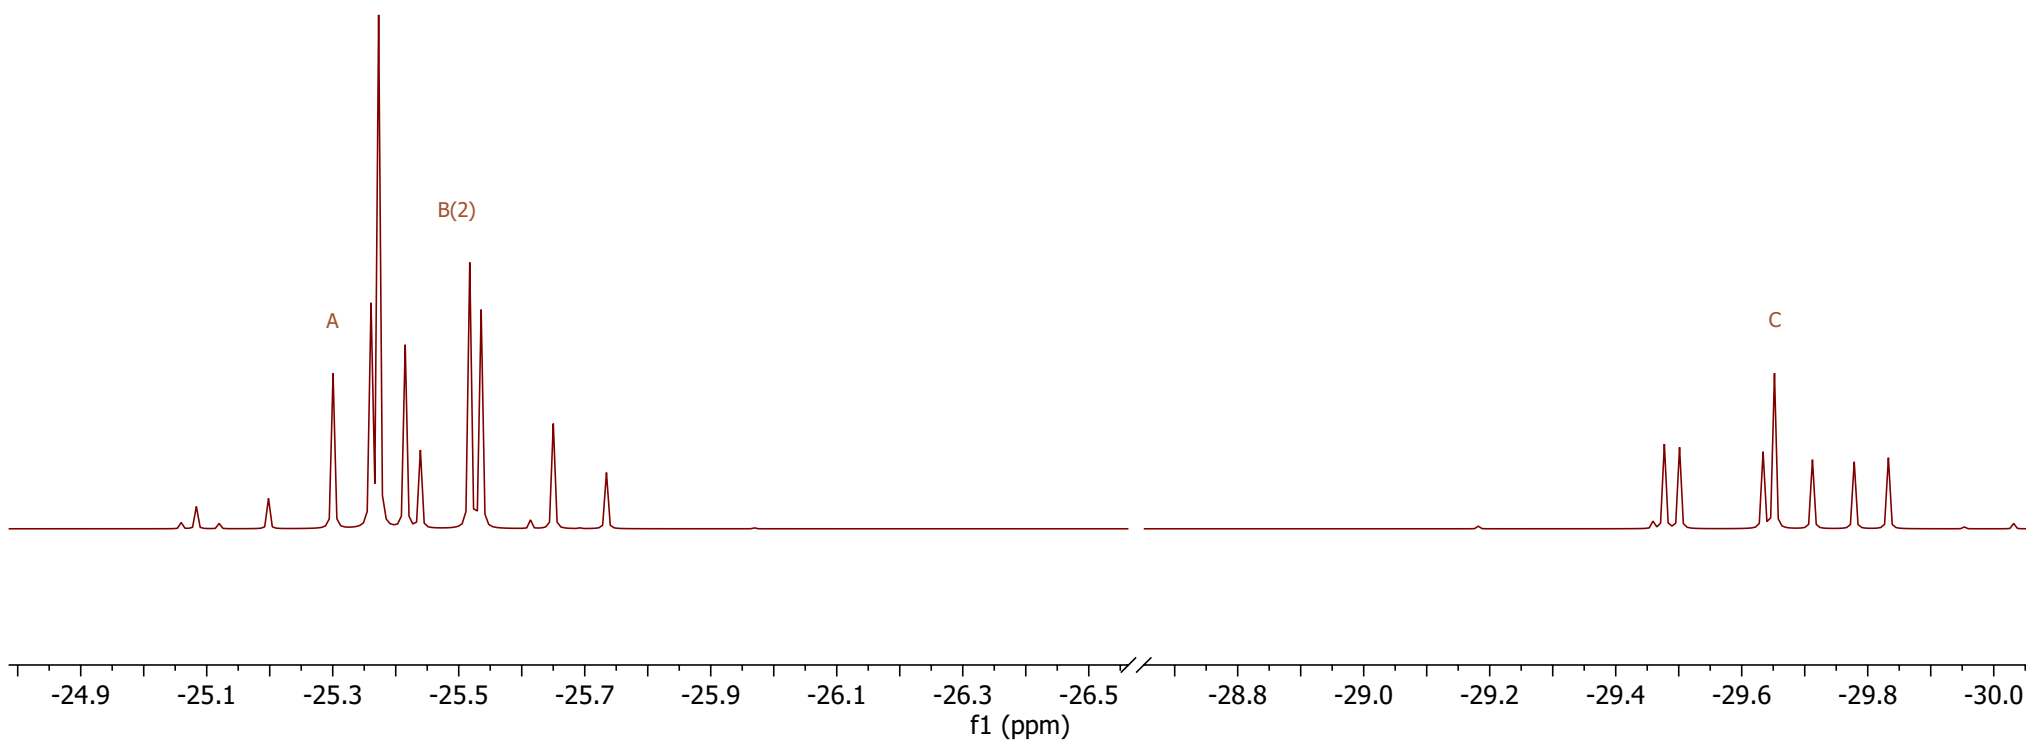

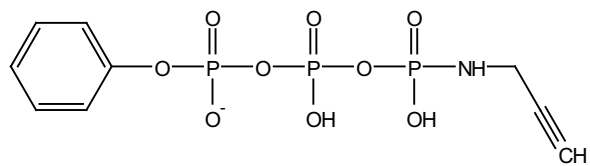

TEA - salt

**78**

B (m) 7.22  
A (m) 7.29  
C (m) 7.43  
D (dd) 3.66  
E (q) 3.21  
F (t) 2.55  
G (t) 1.29

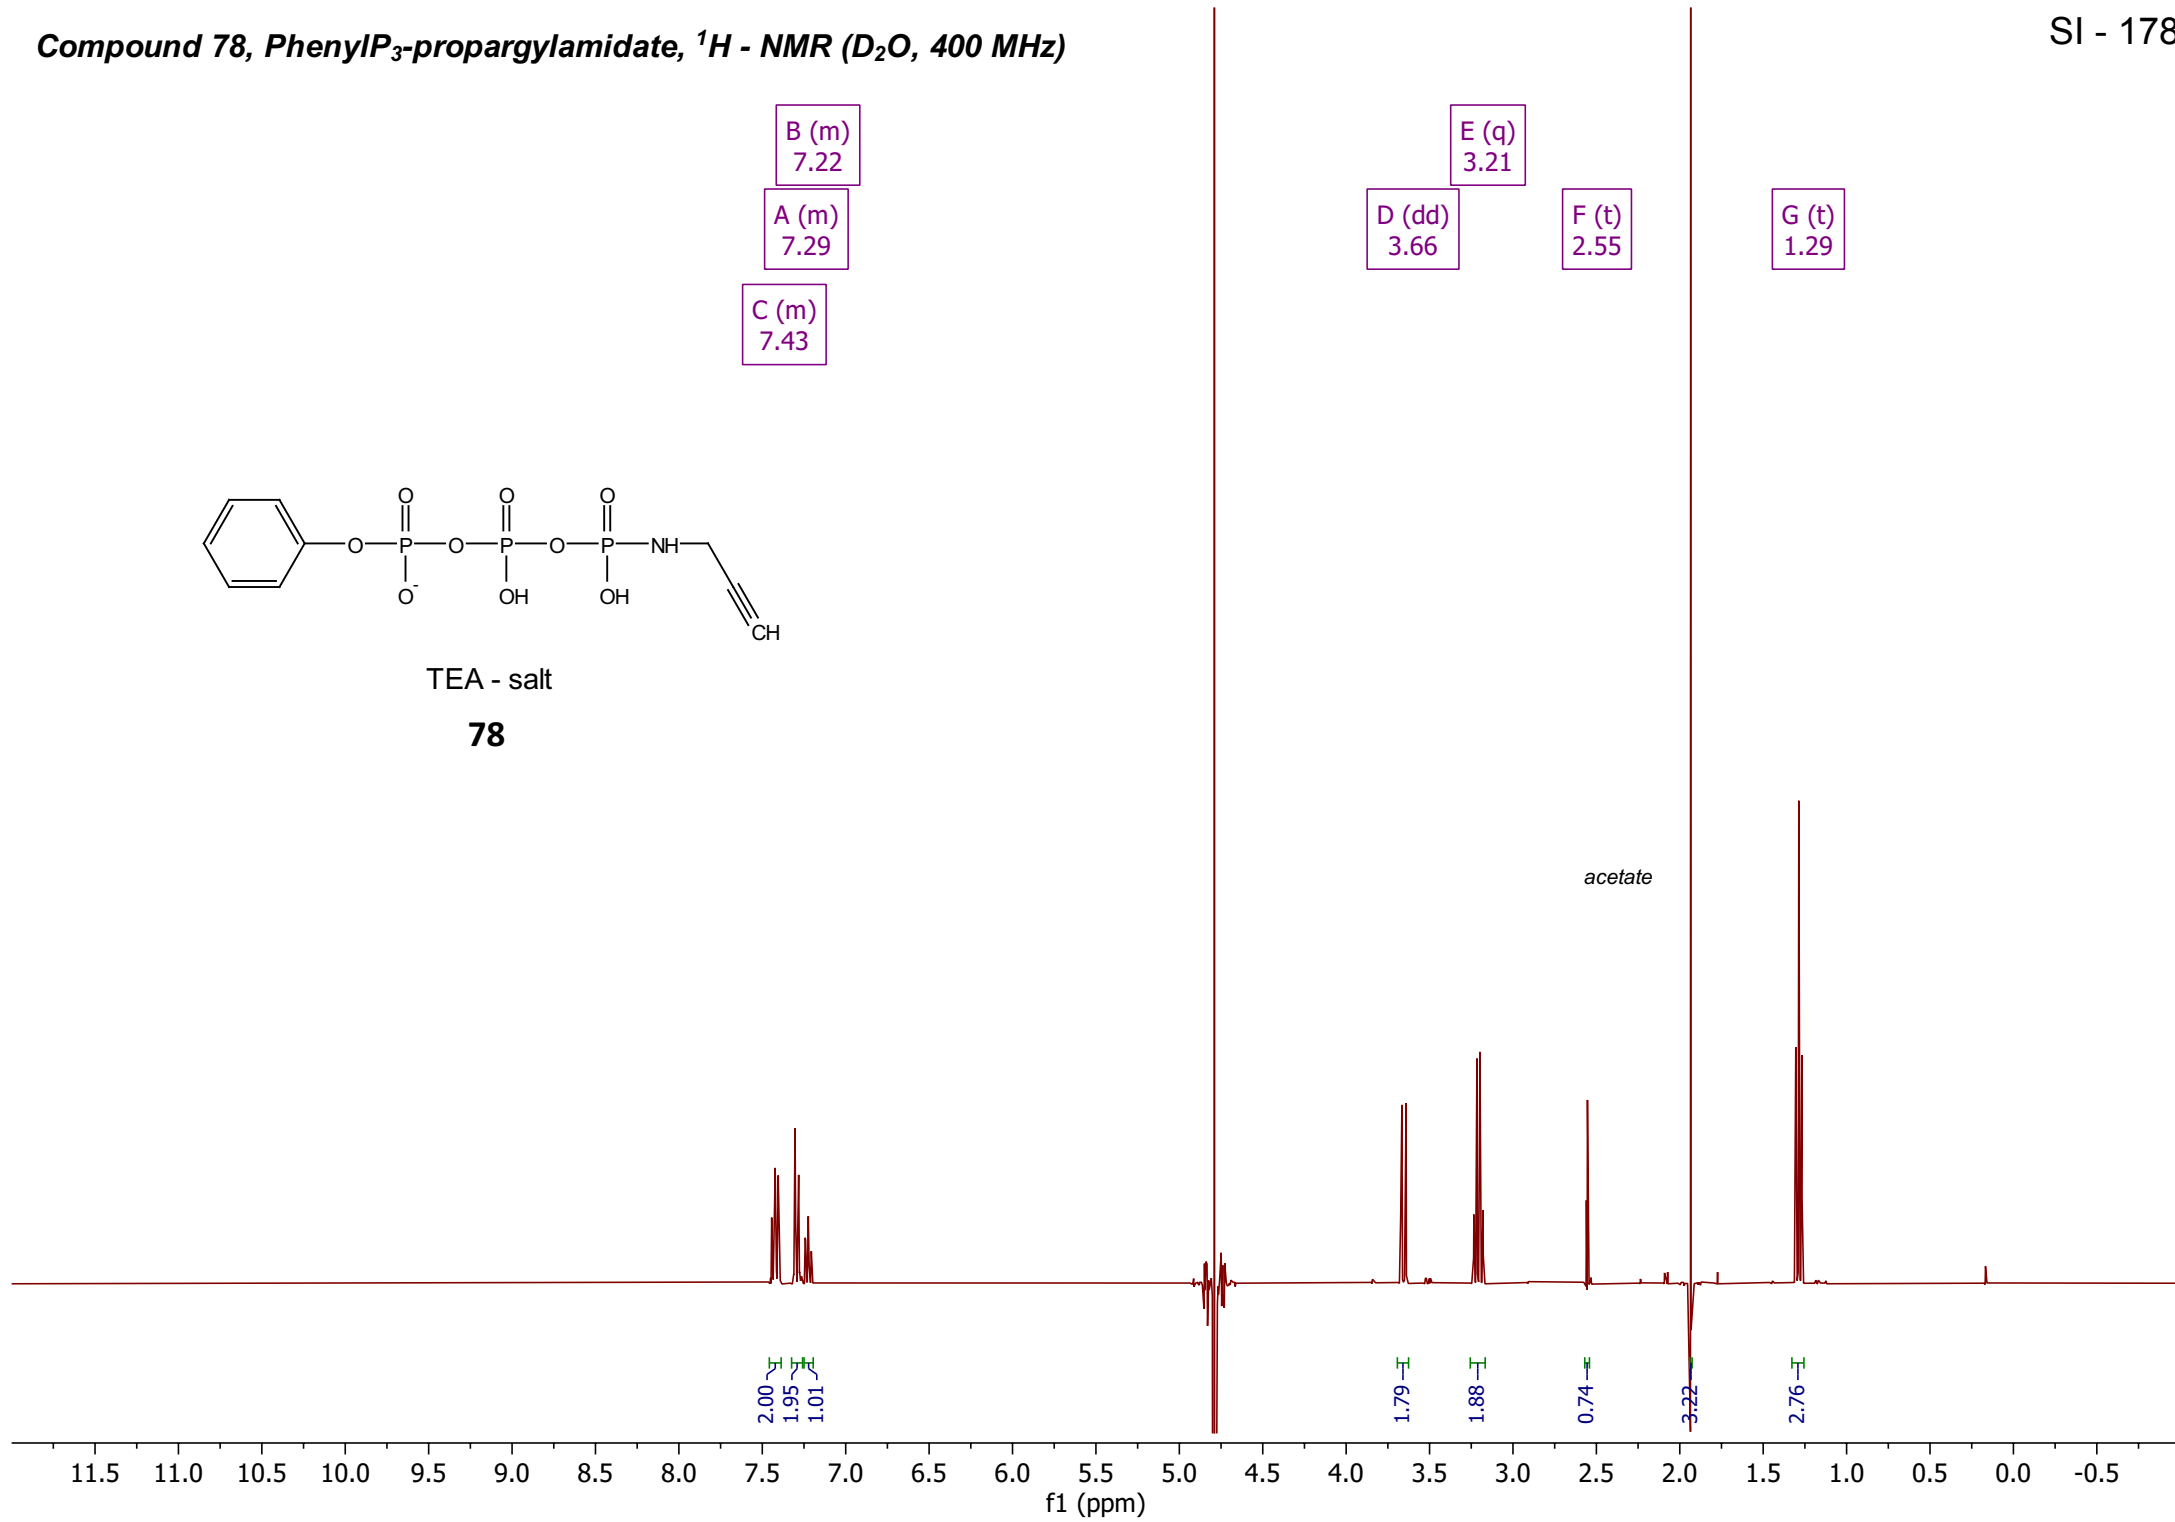

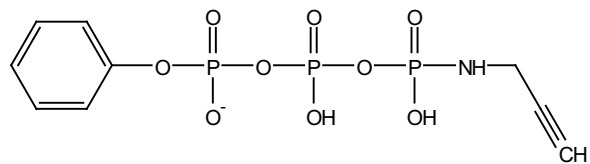

TEA - salt

**78**

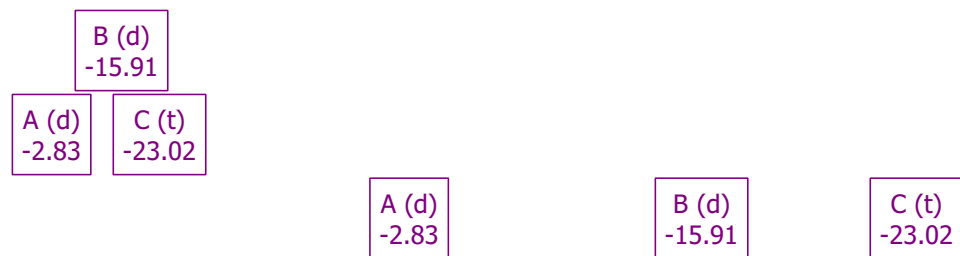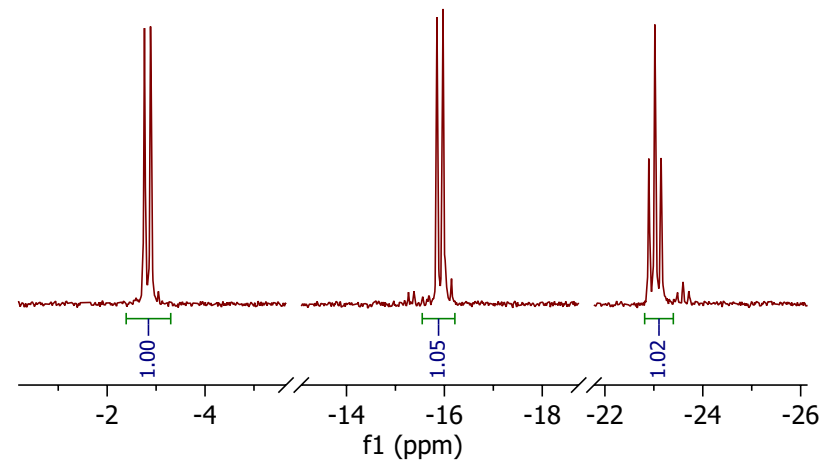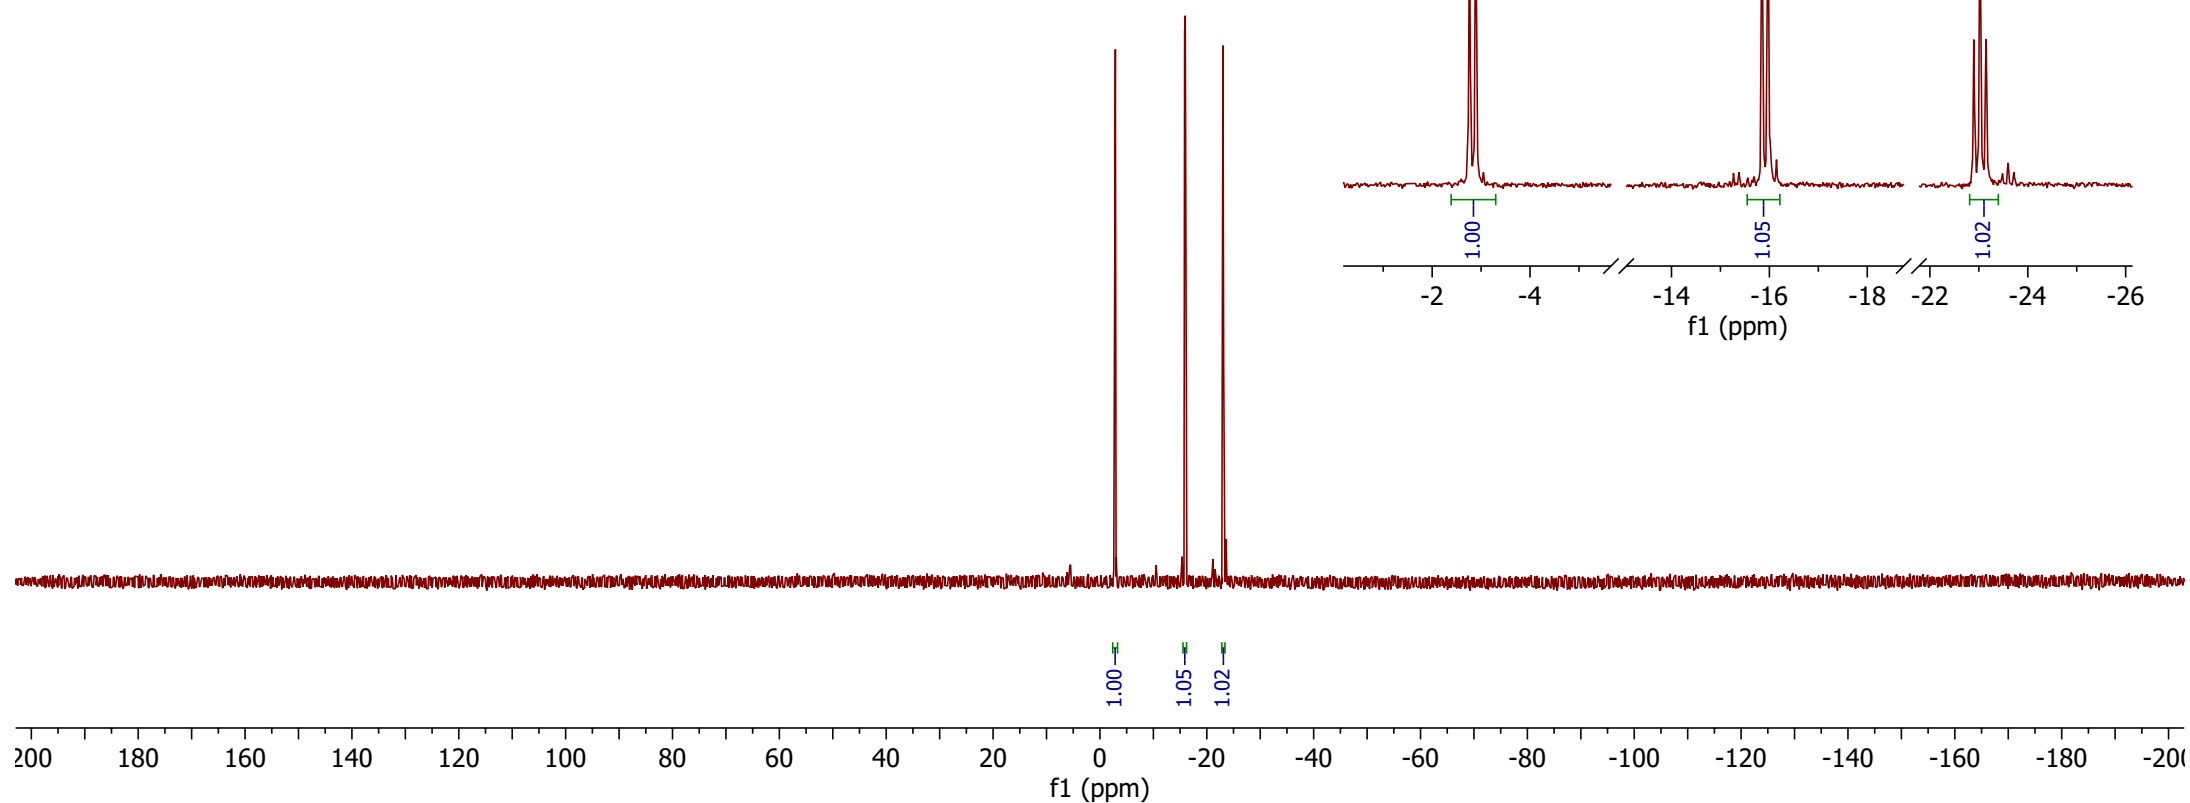

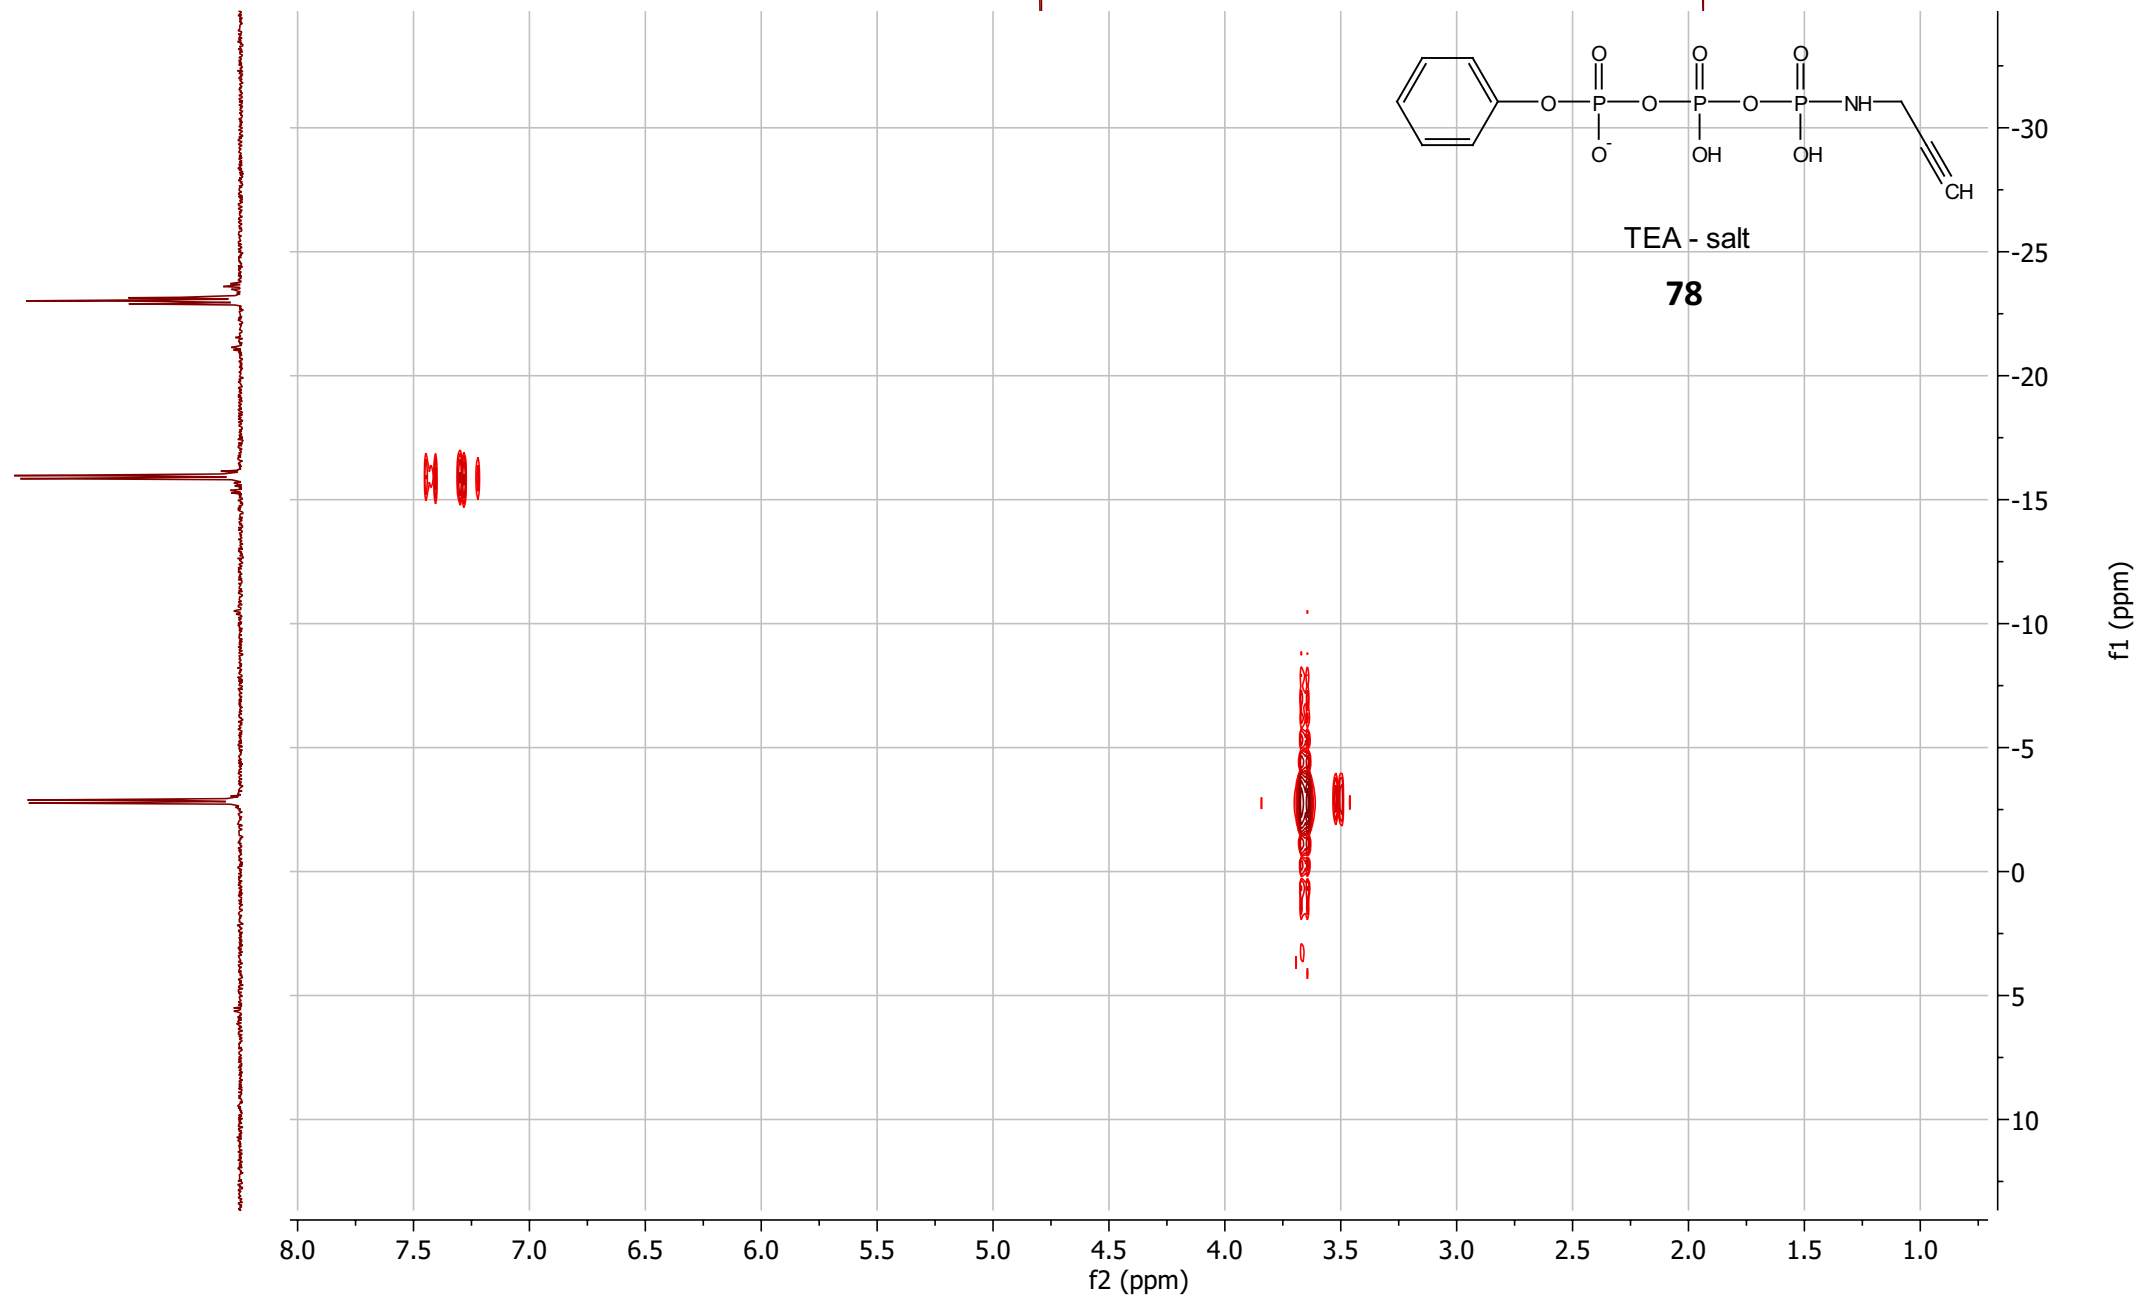

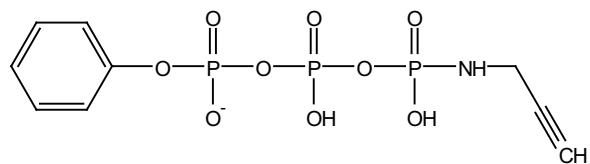

TEA - salt

**78**

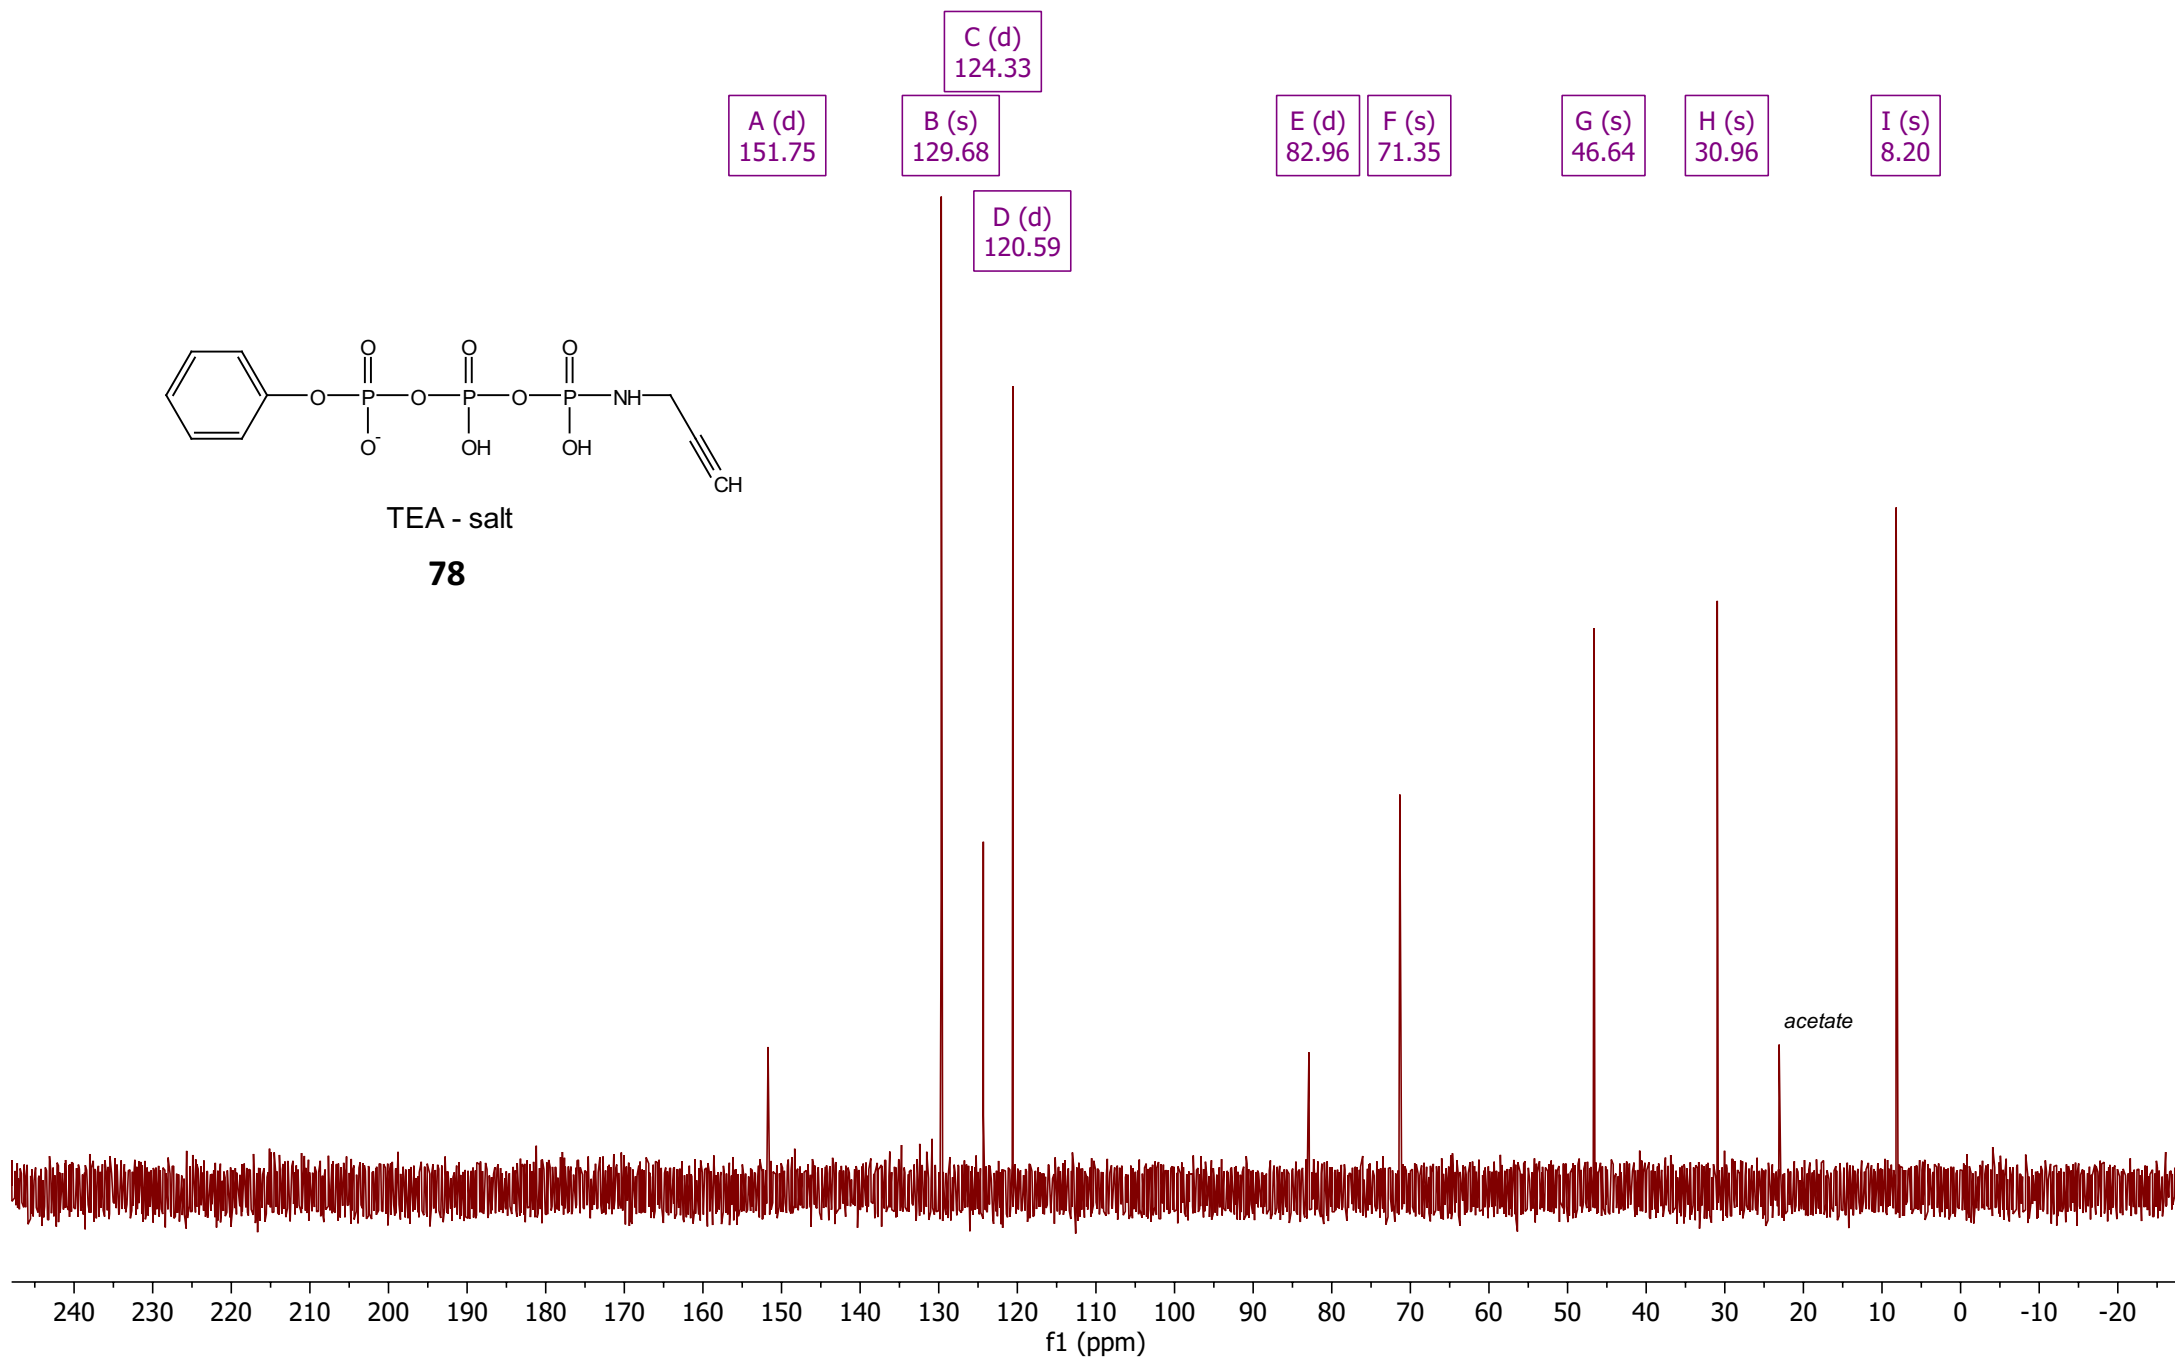



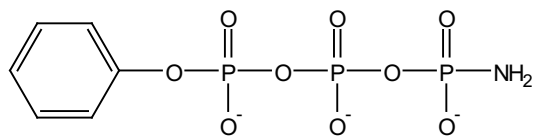

Na - salt

**79**

B (m)  
7.30

A (m)  
7.43

C (m)  
7.24

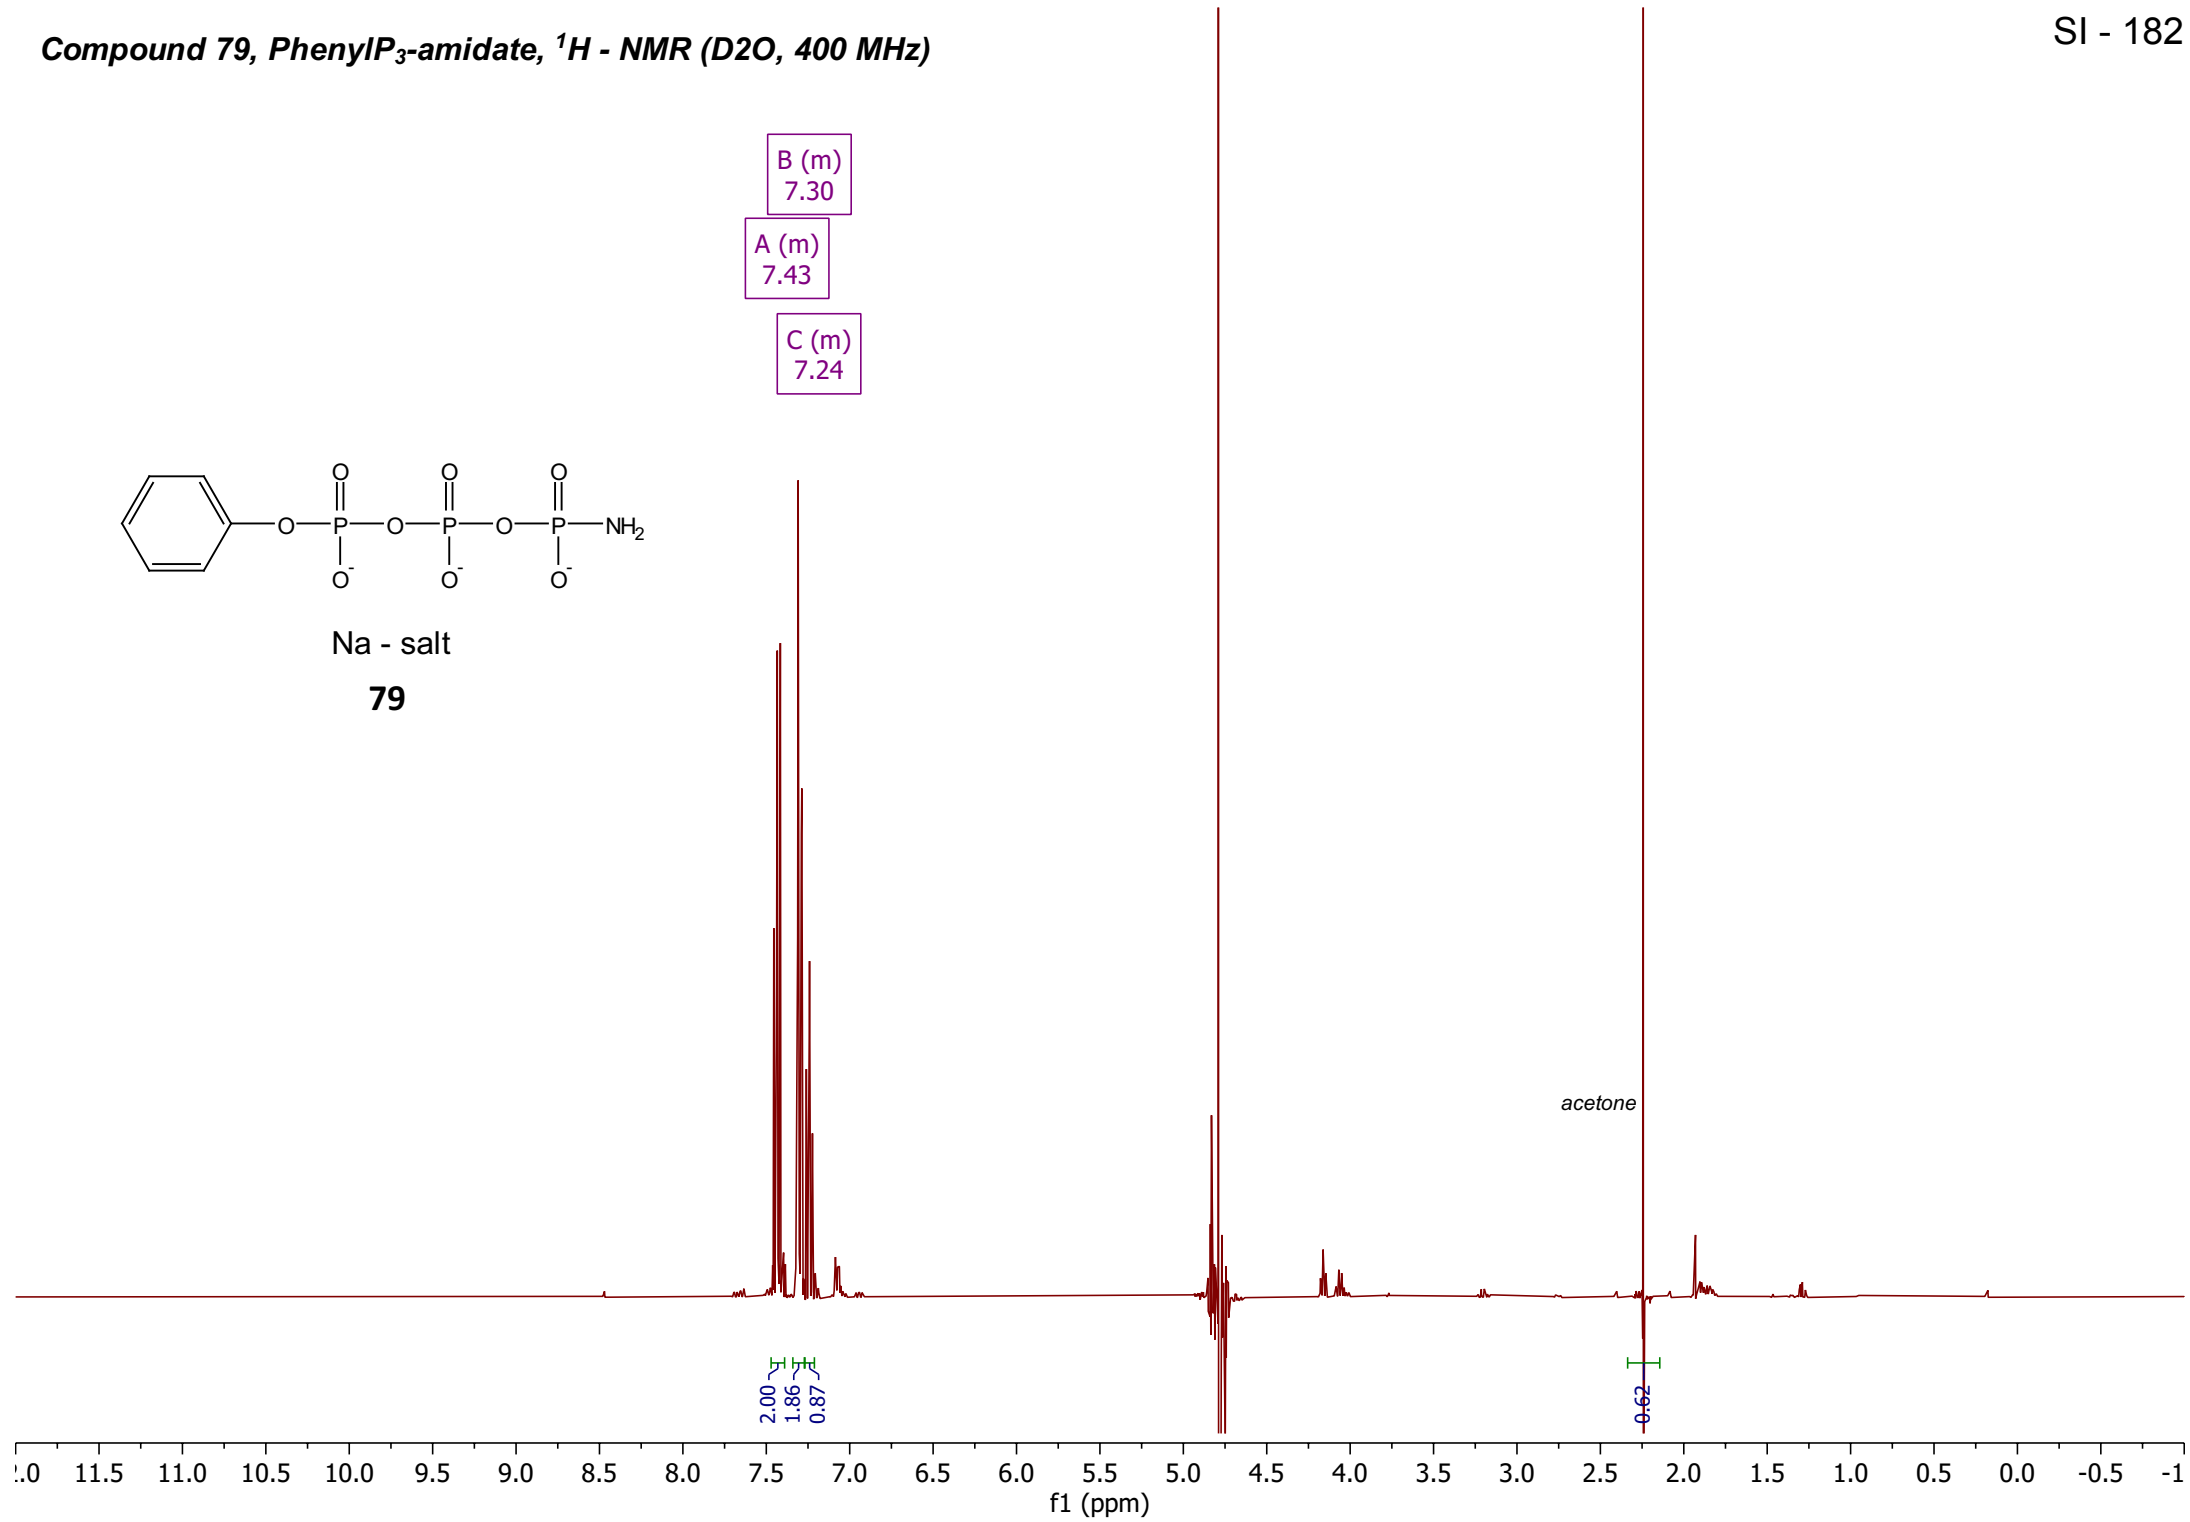

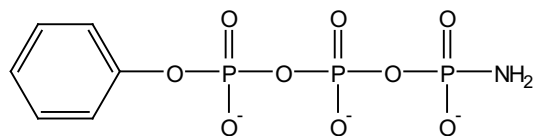

Na - salt

79

B (d)  
-15.76  
A (d)  
-1.03  
C (t)  
-22.68

A (d)  
-1.03  
B (d)  
-15.76  
C (t)  
-22.68

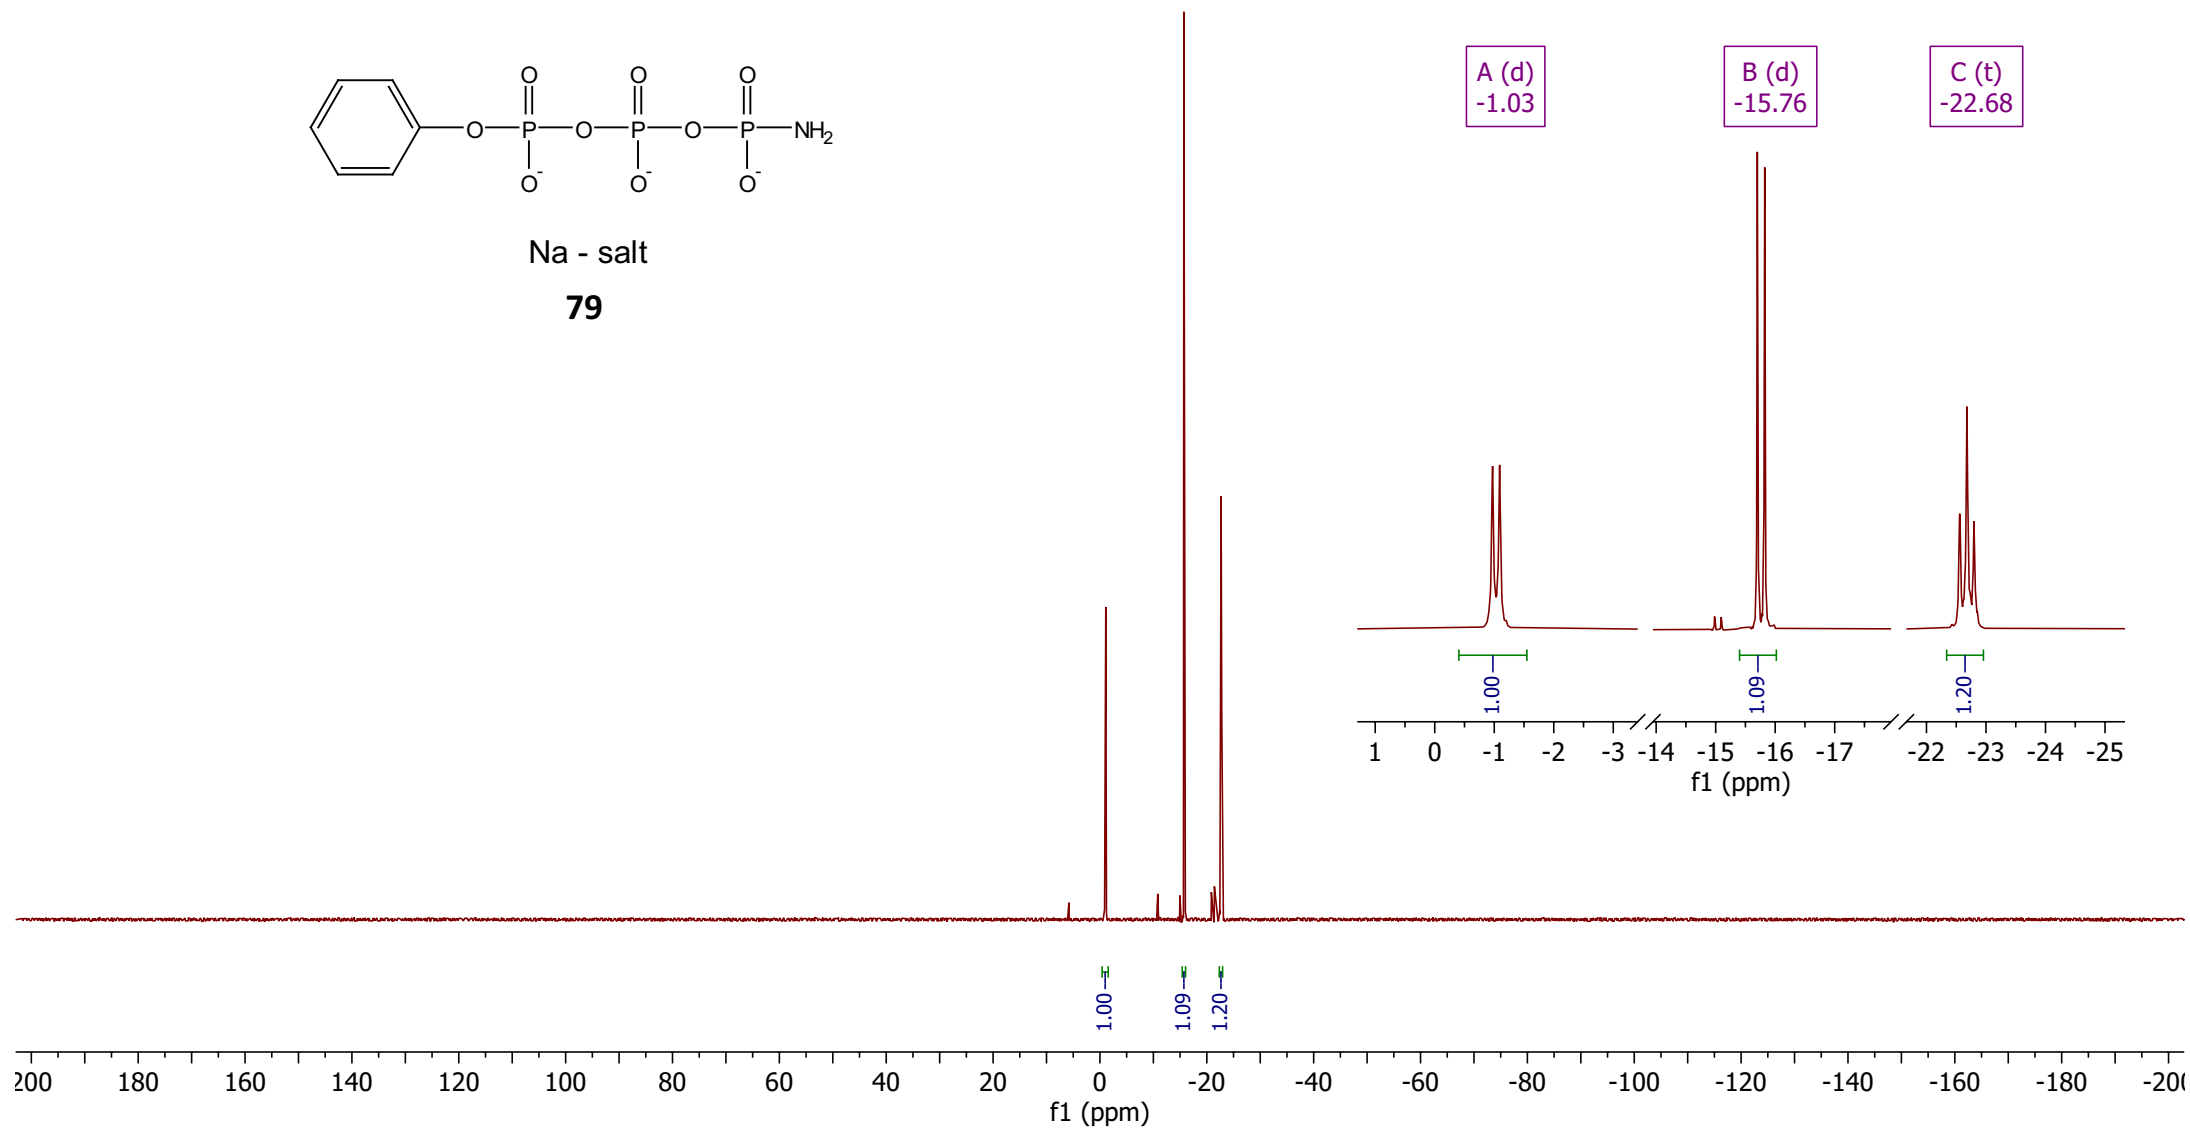

A (d)  
151.70

B (s)  
129.72

C (d)  
124.44

D (d)  
120.61

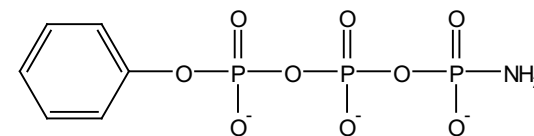

Na - salt

**79**

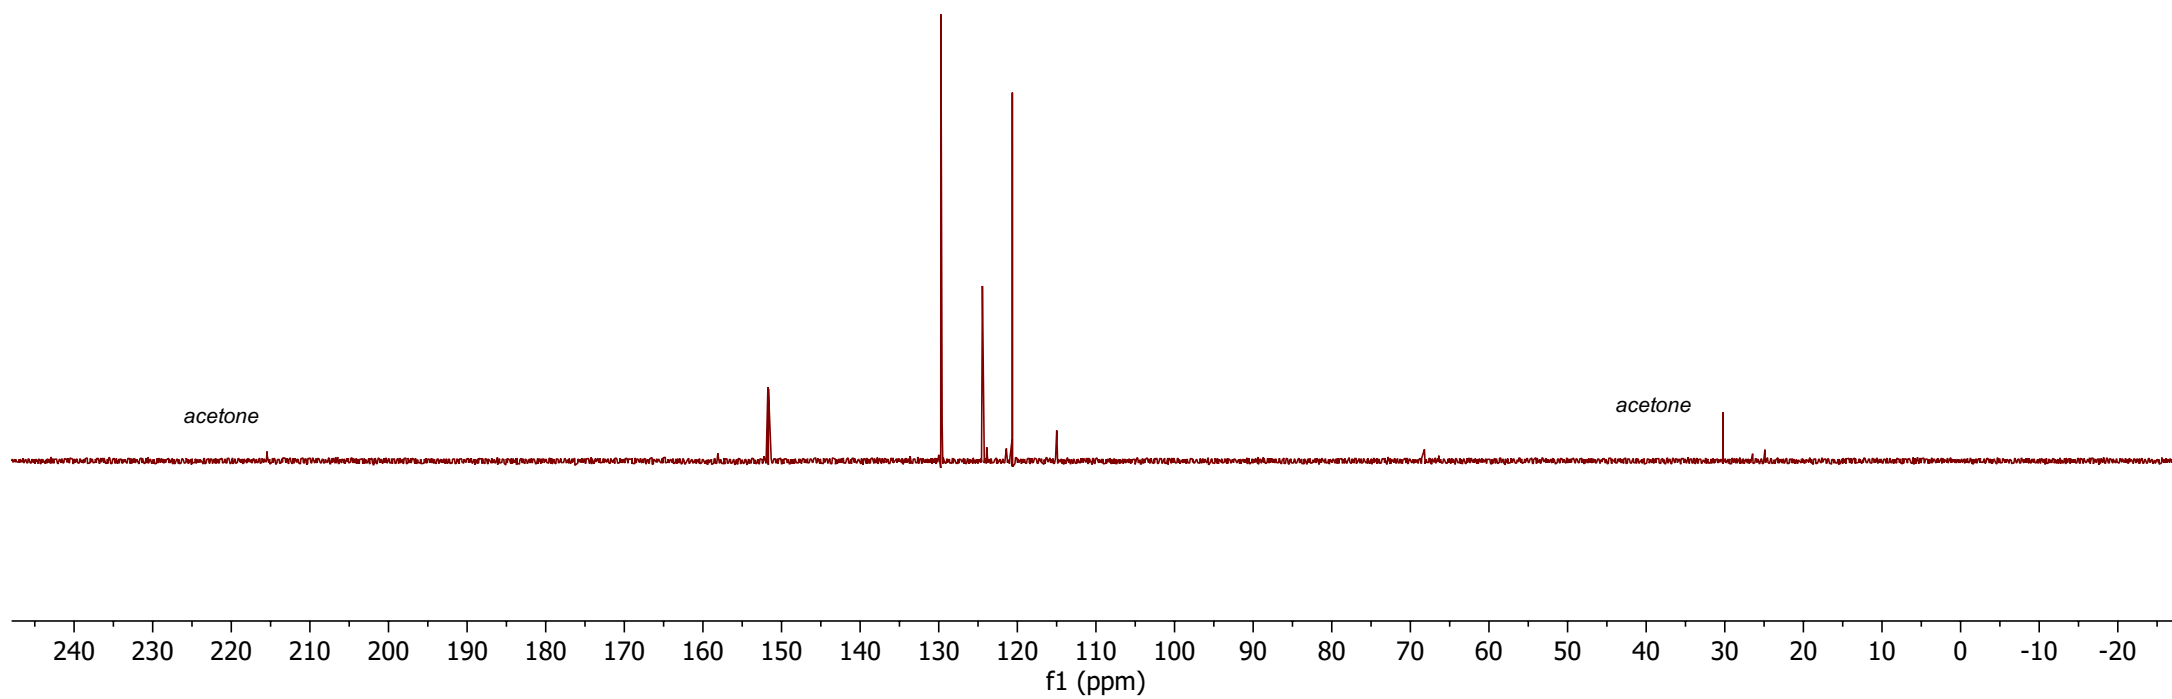

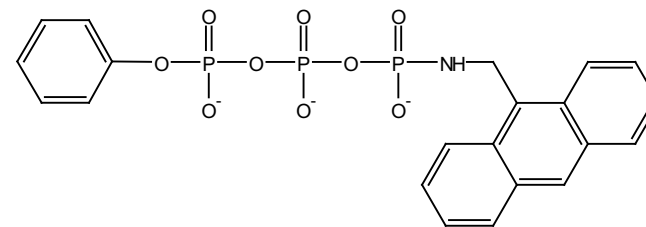

Na - salt  
**80**

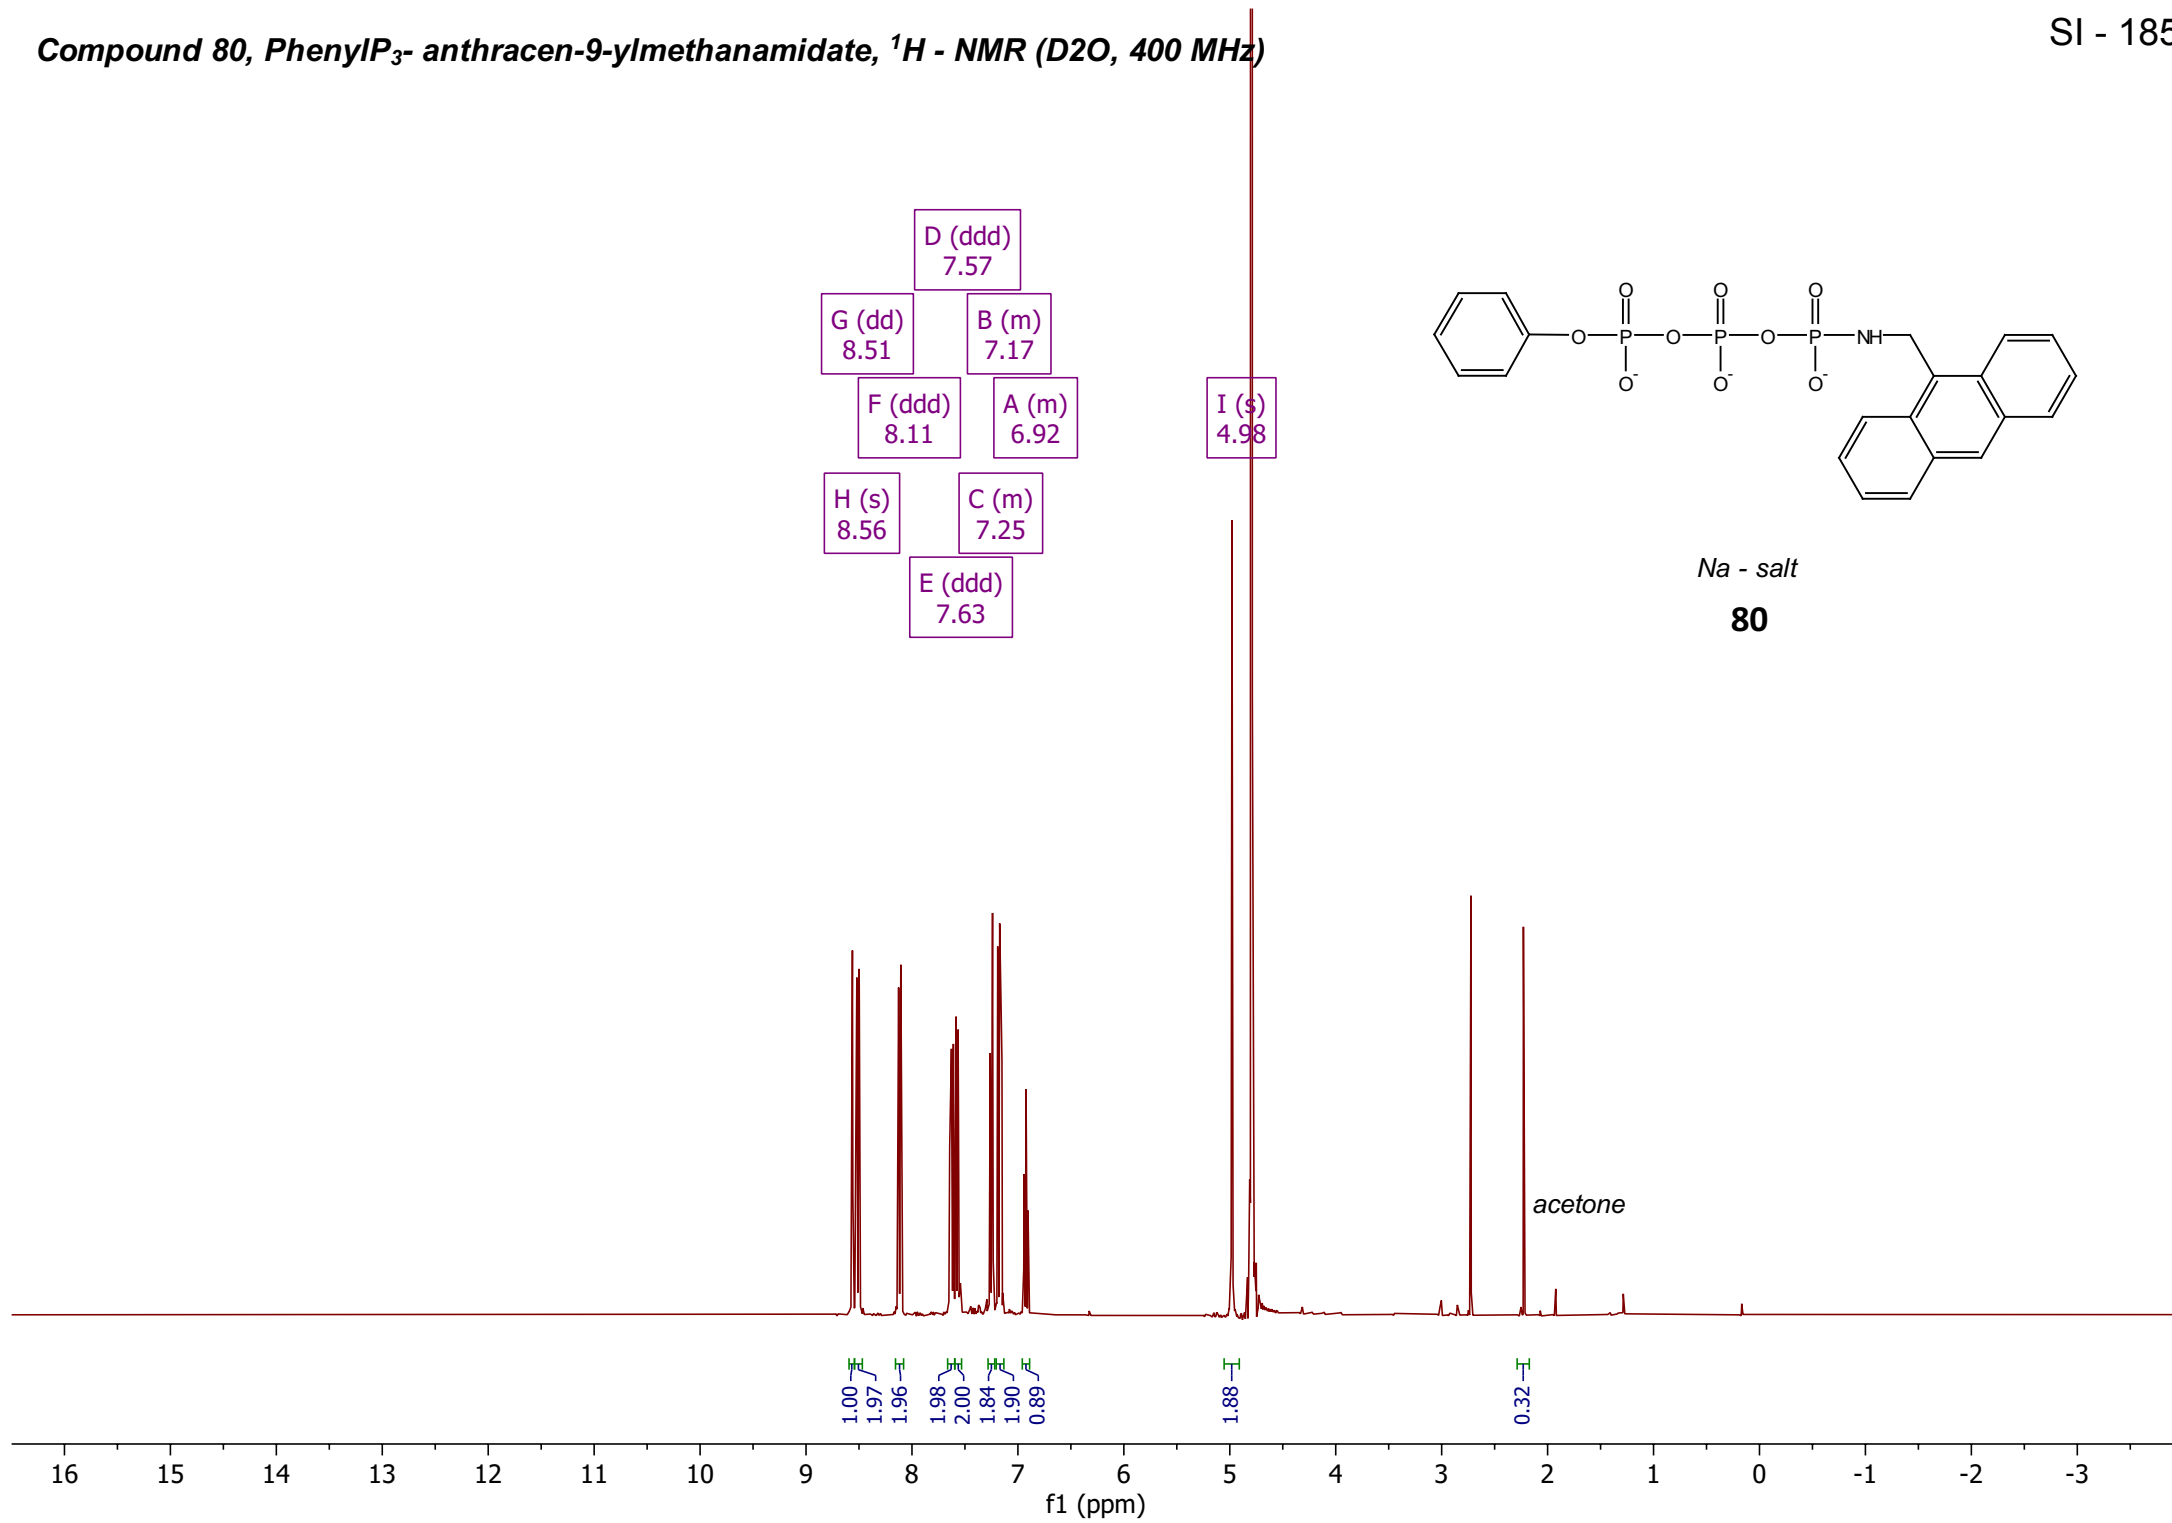

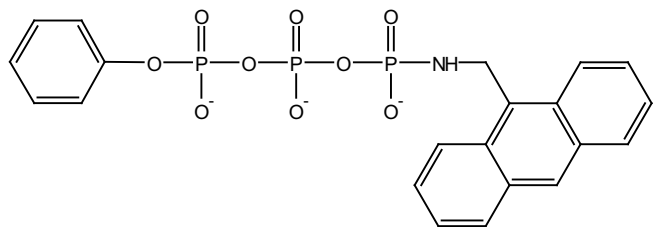

Na - salt

**80**

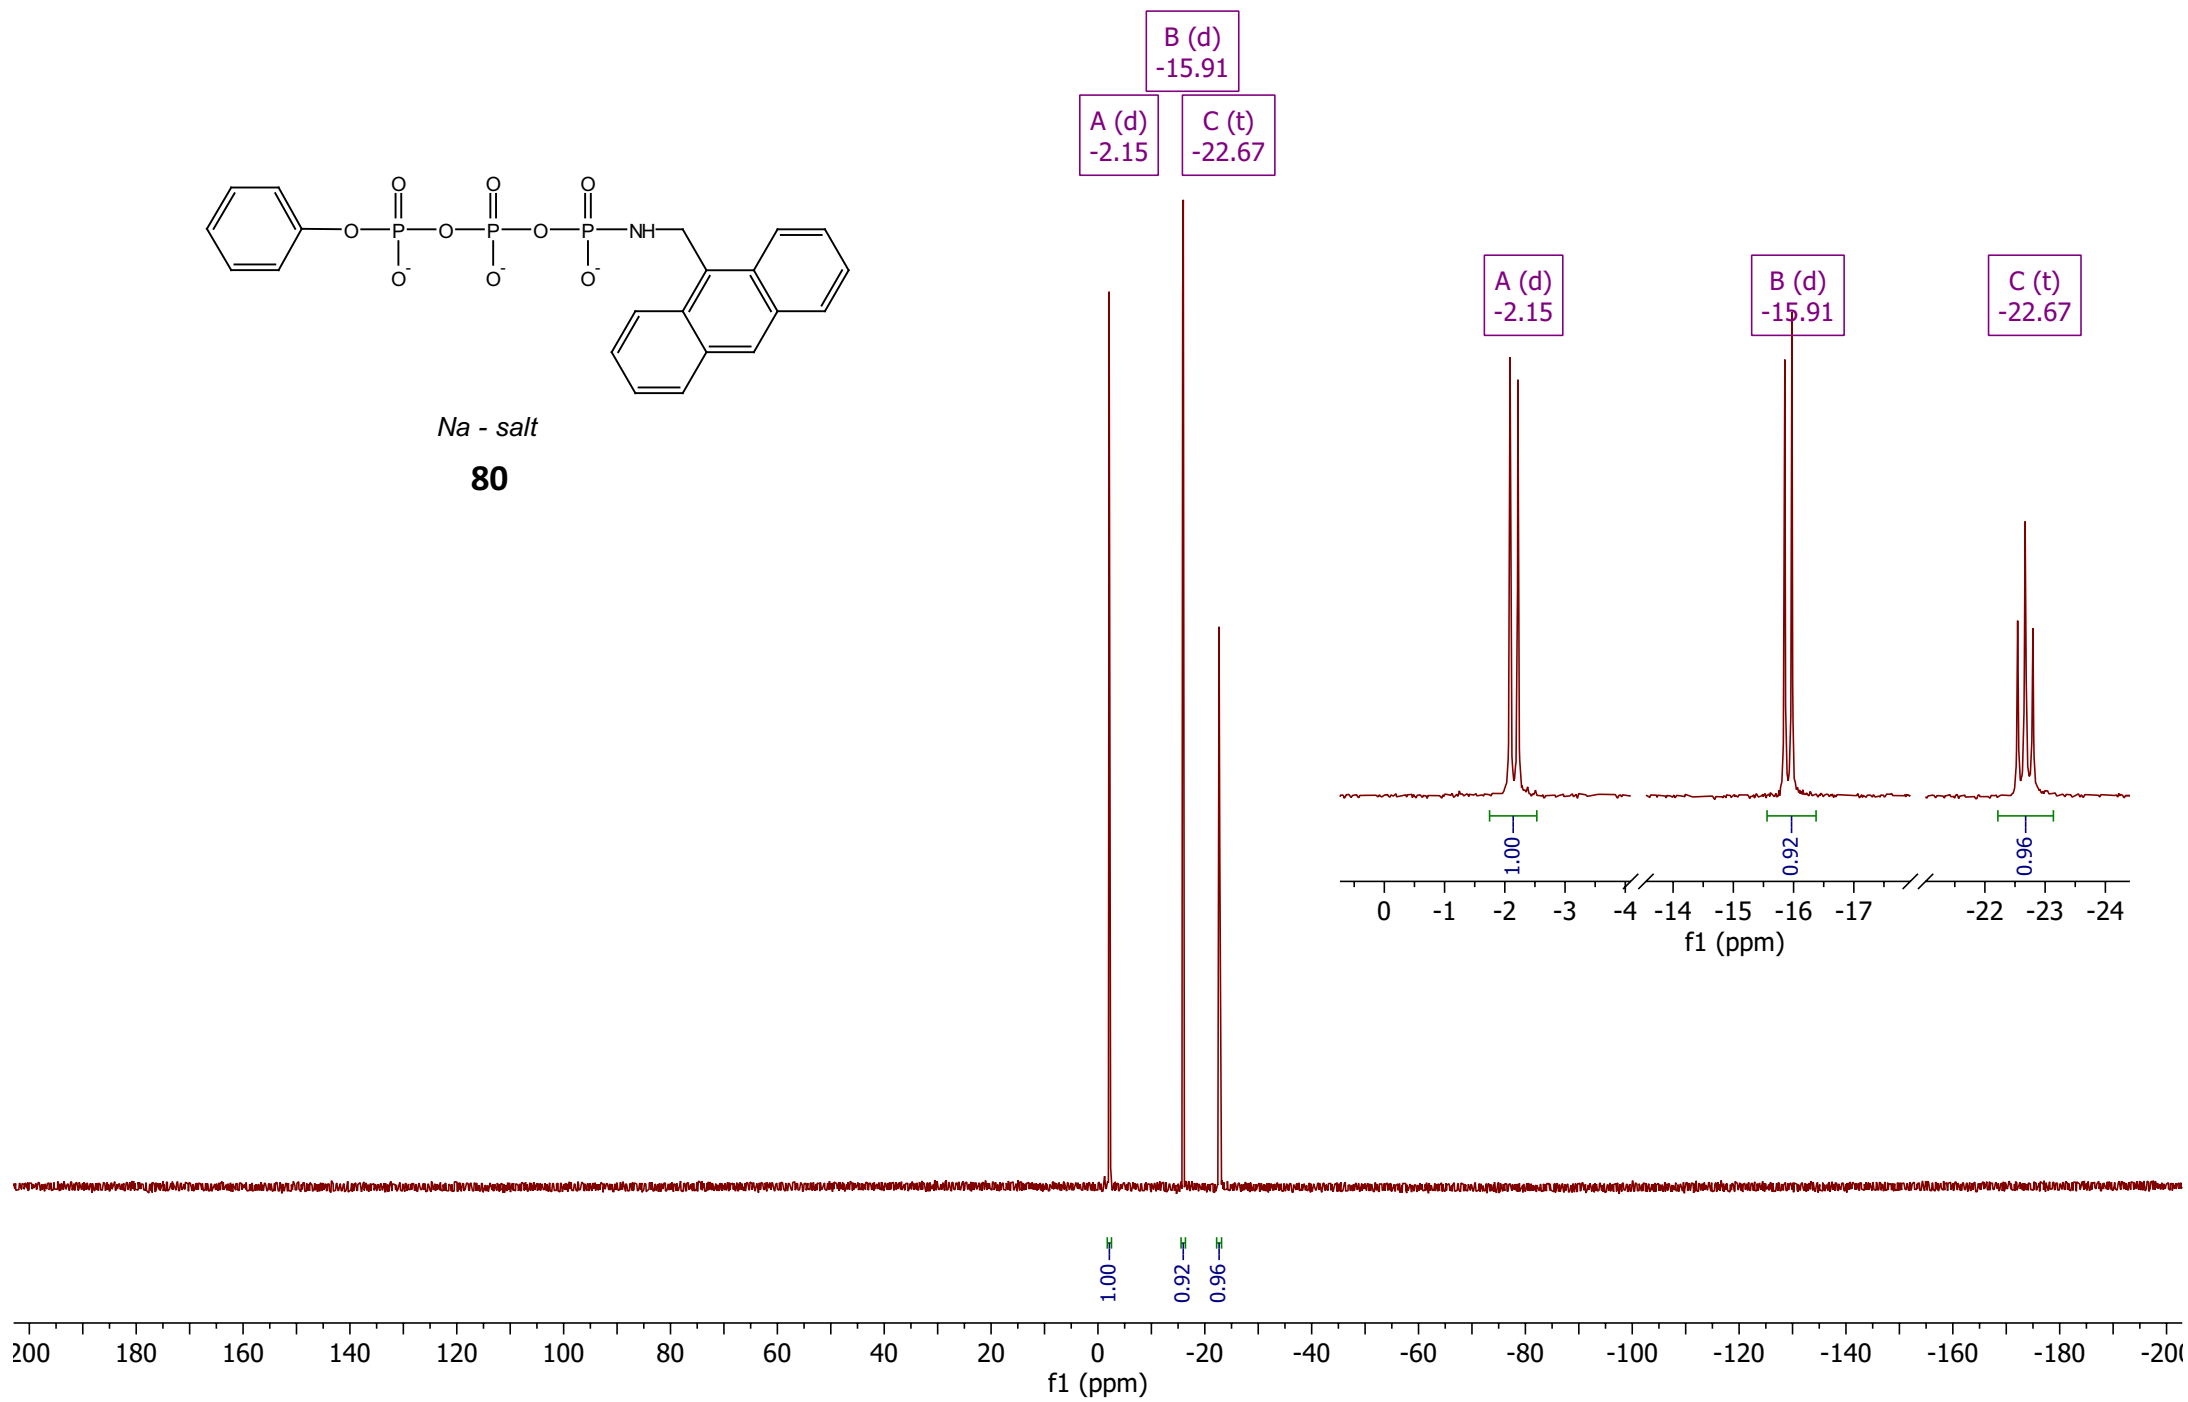

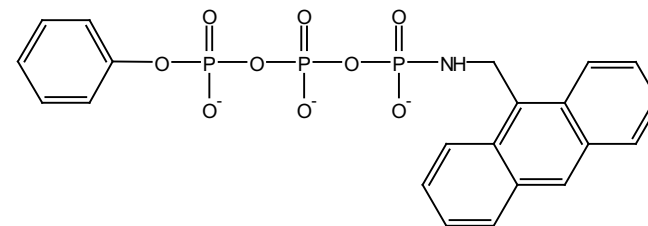

Na - salt  
**80**

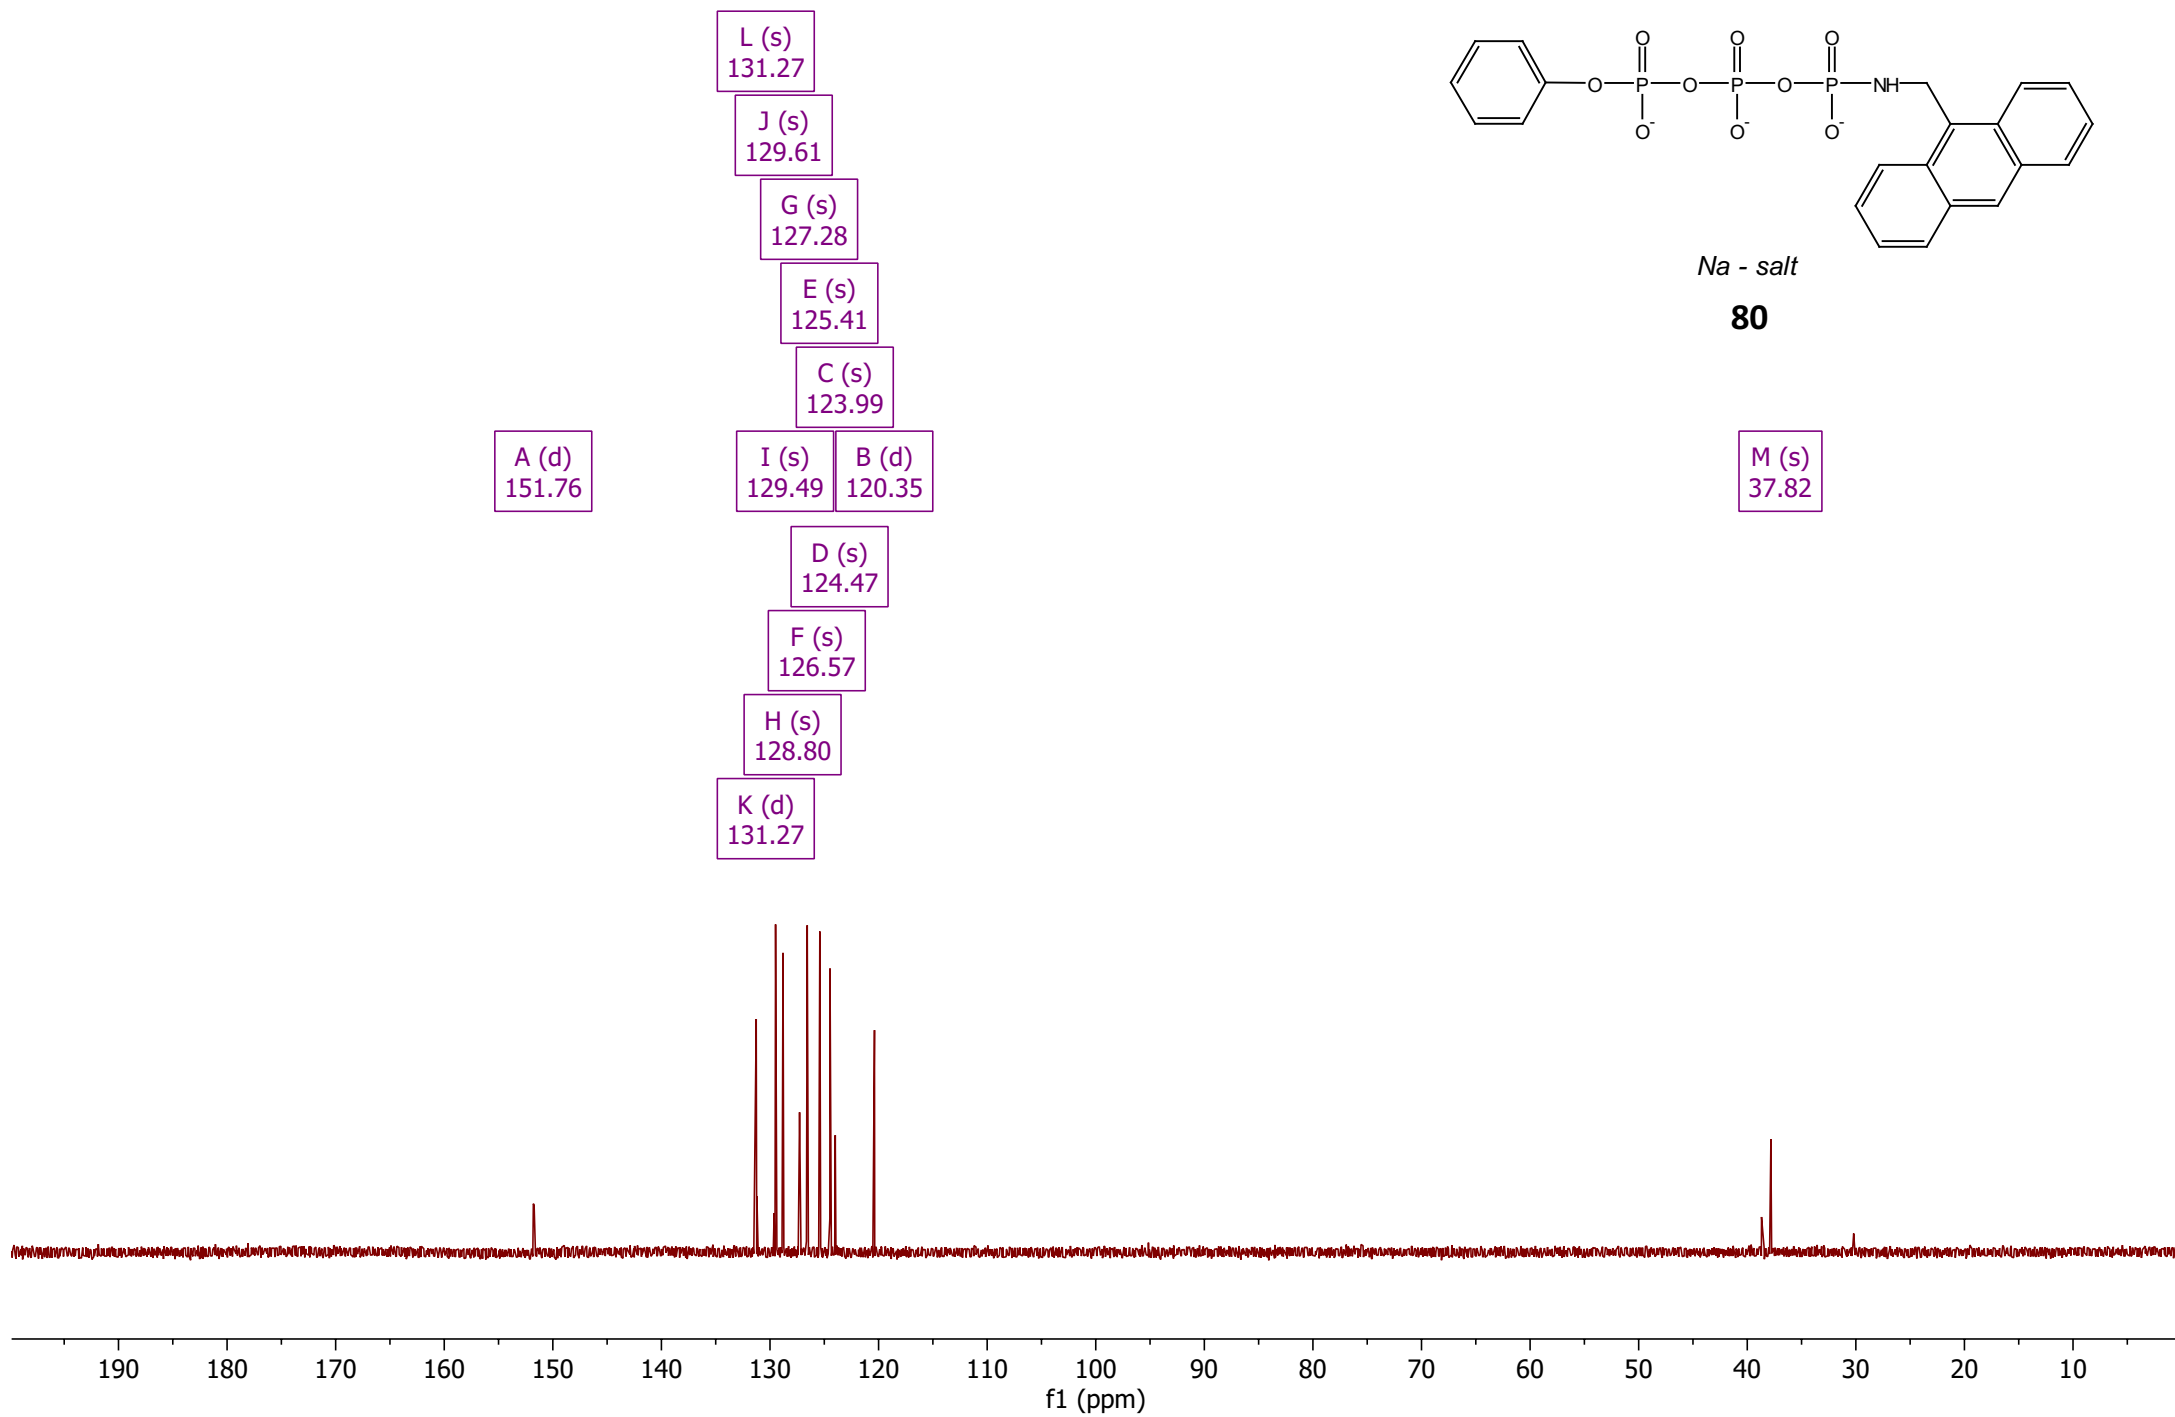

Compound 81, PhenylP<sub>3</sub>-5'-deoxyadenosyl-5'-amidate, <sup>1</sup>H - NMR (D<sub>2</sub>O, 400 MHz)

SI - 188

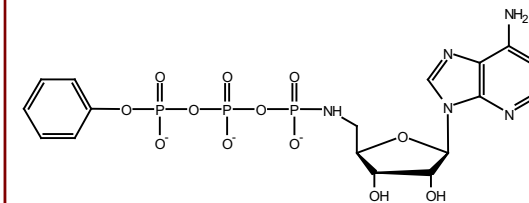

Na - salt

**81**

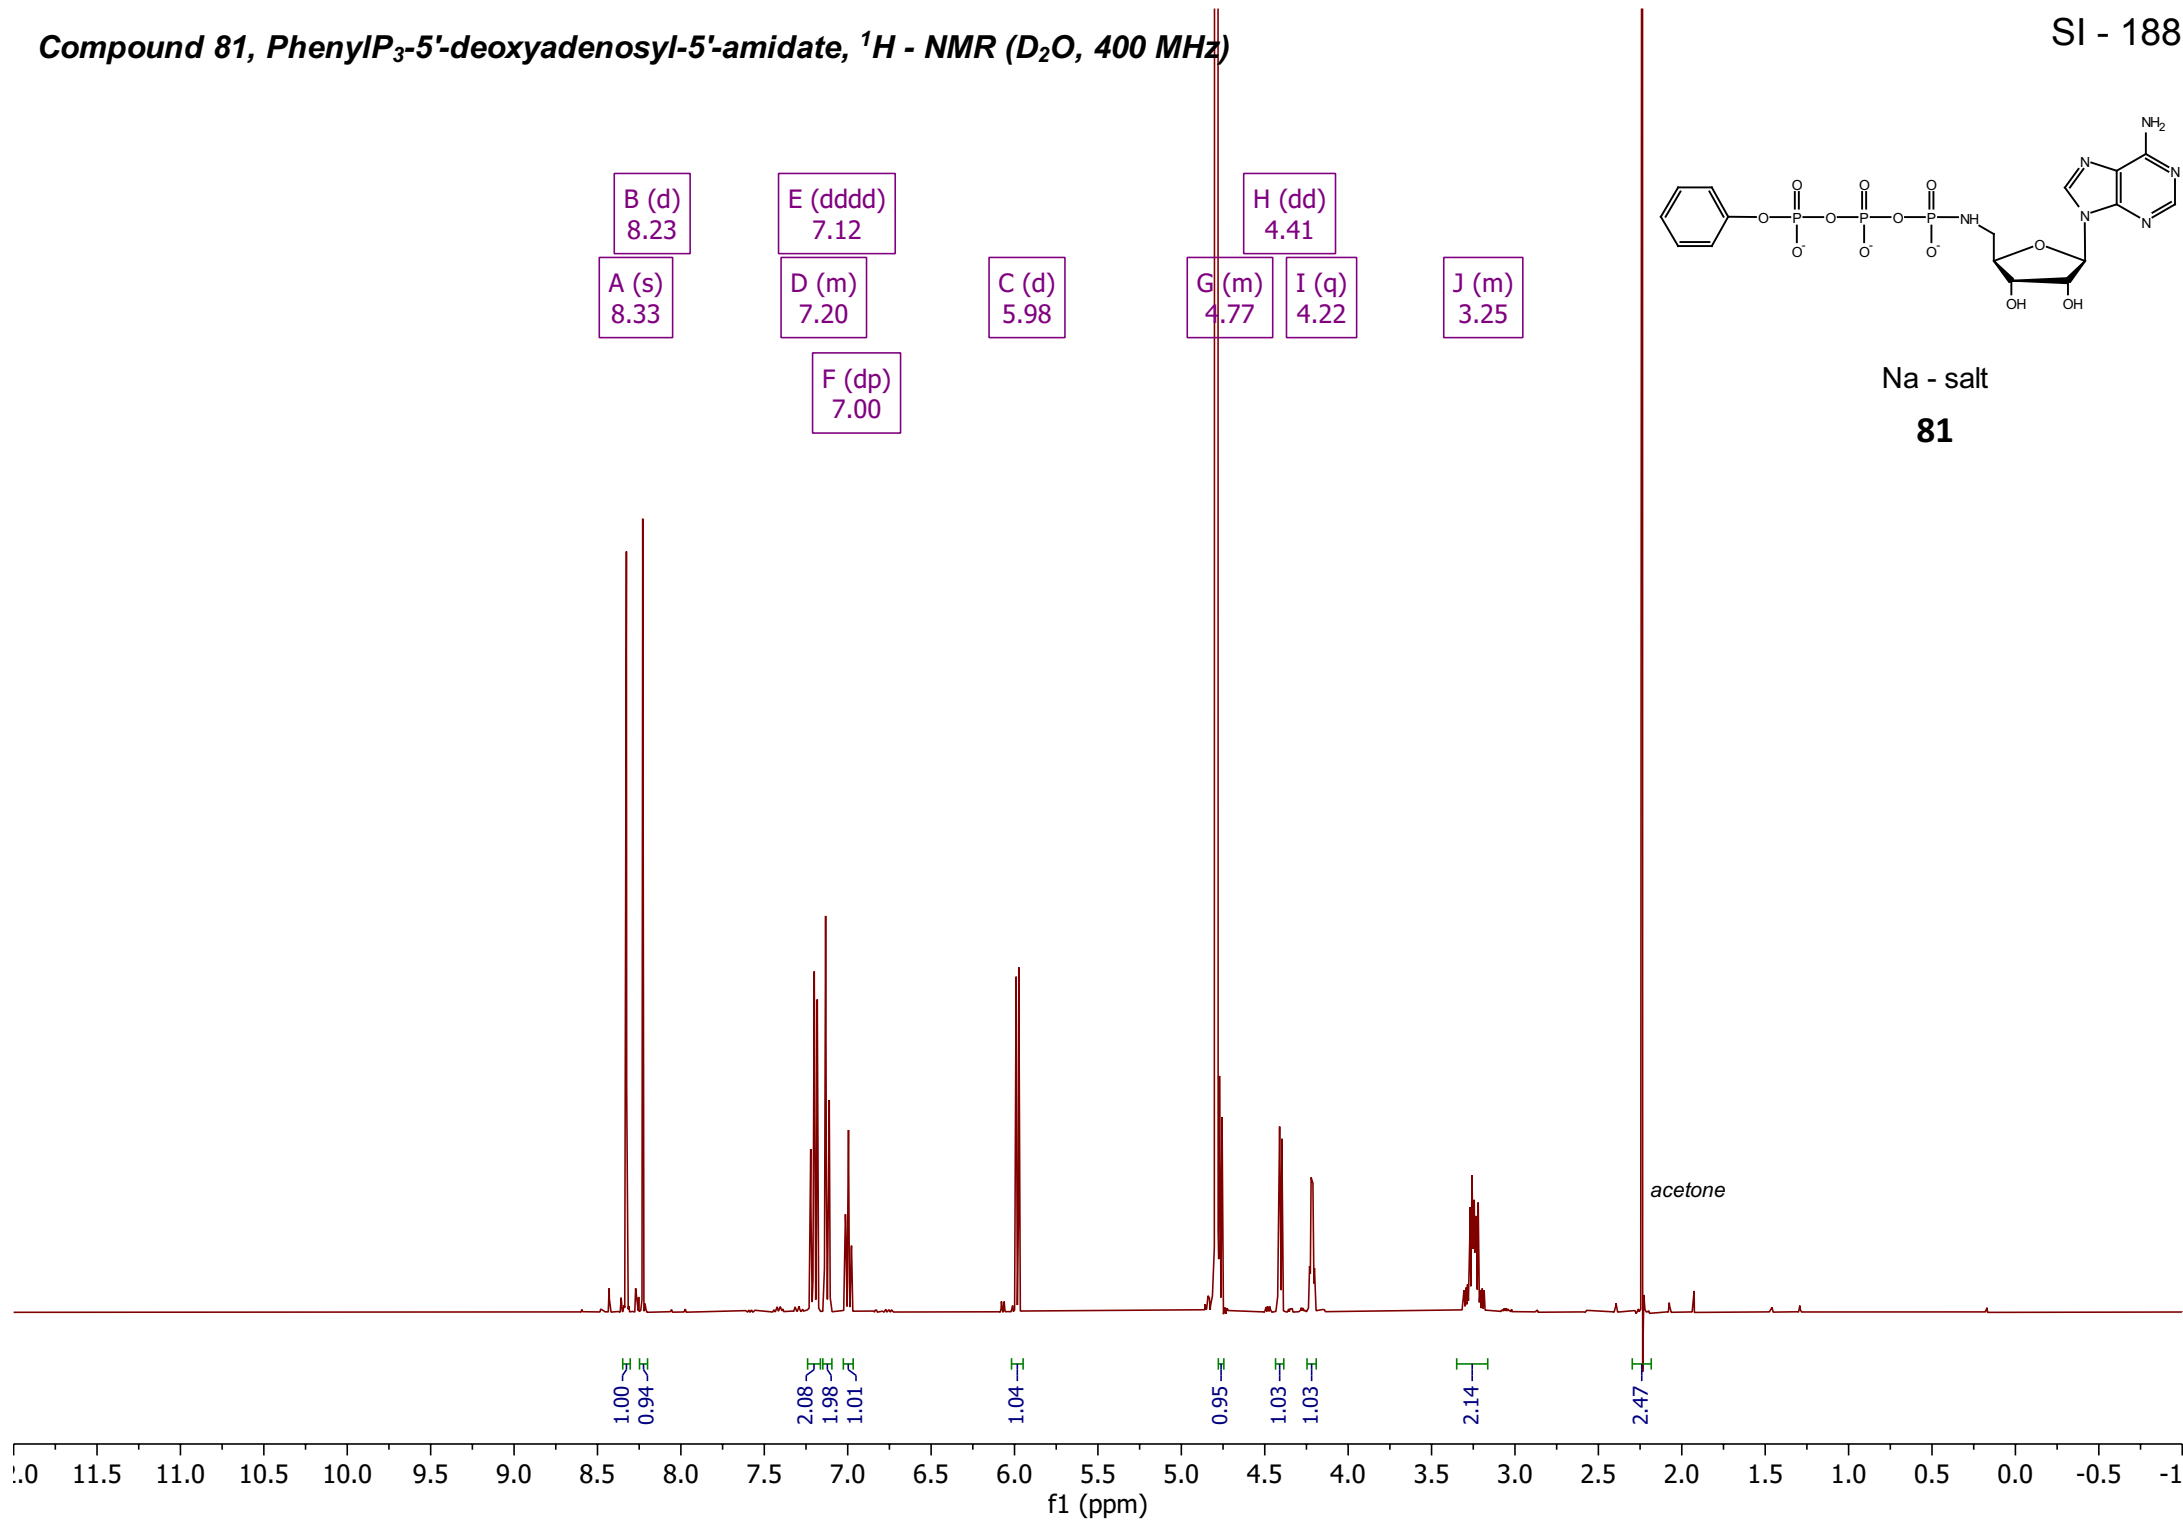

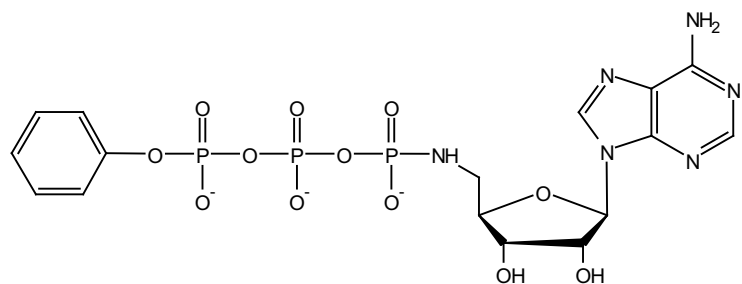

Na - salt  
**81**

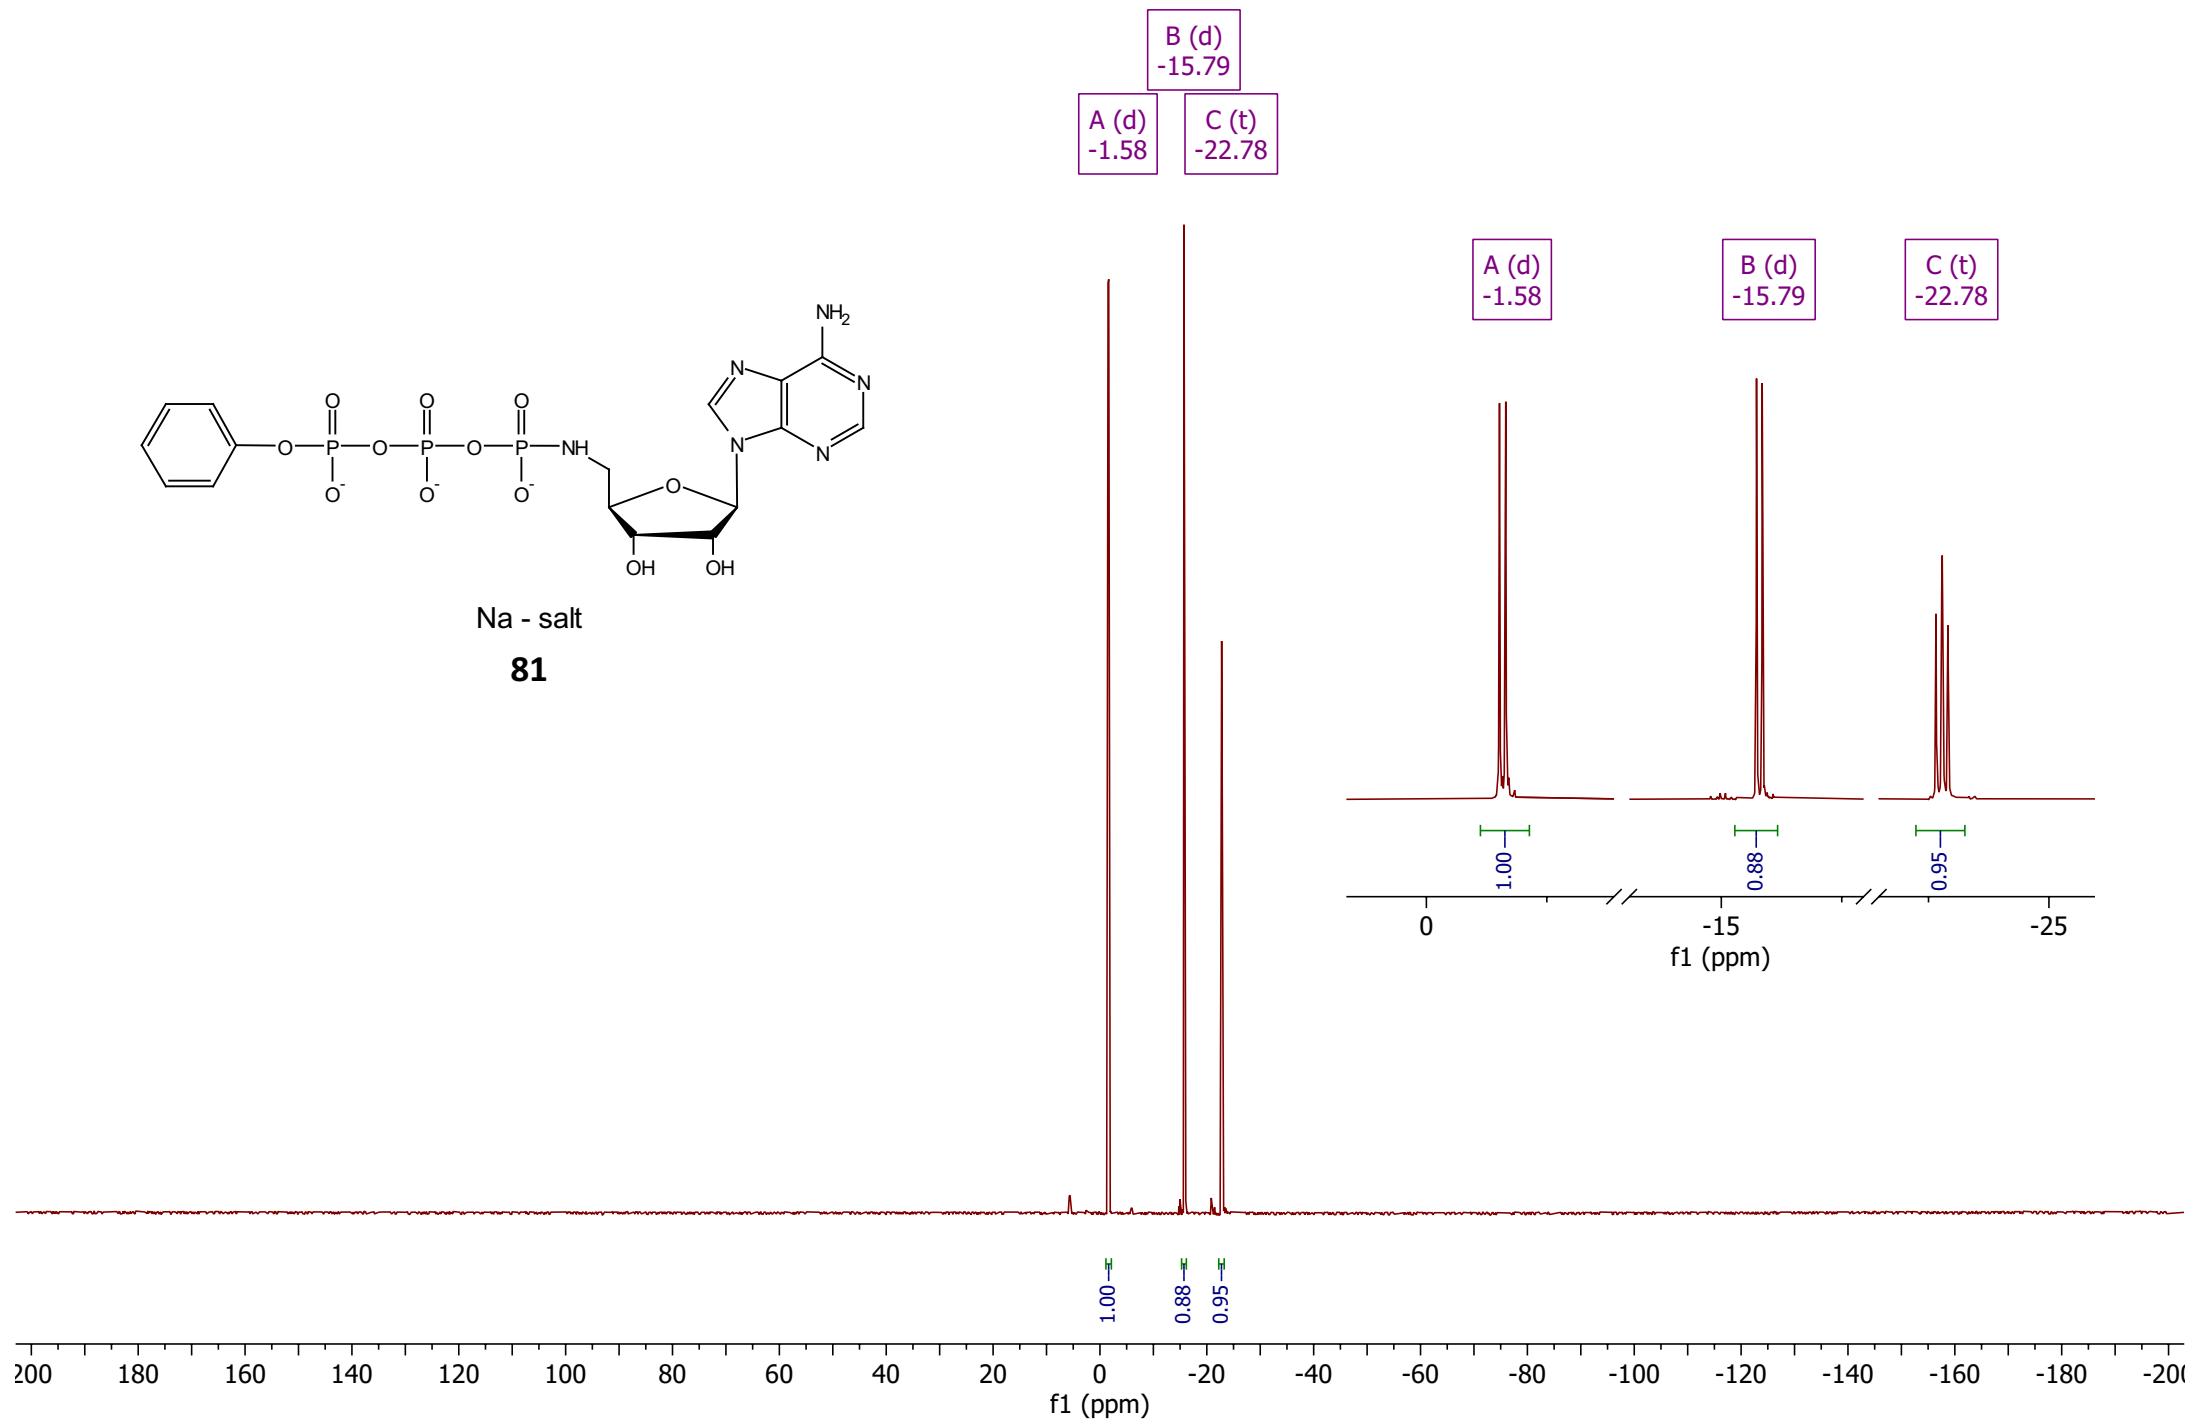



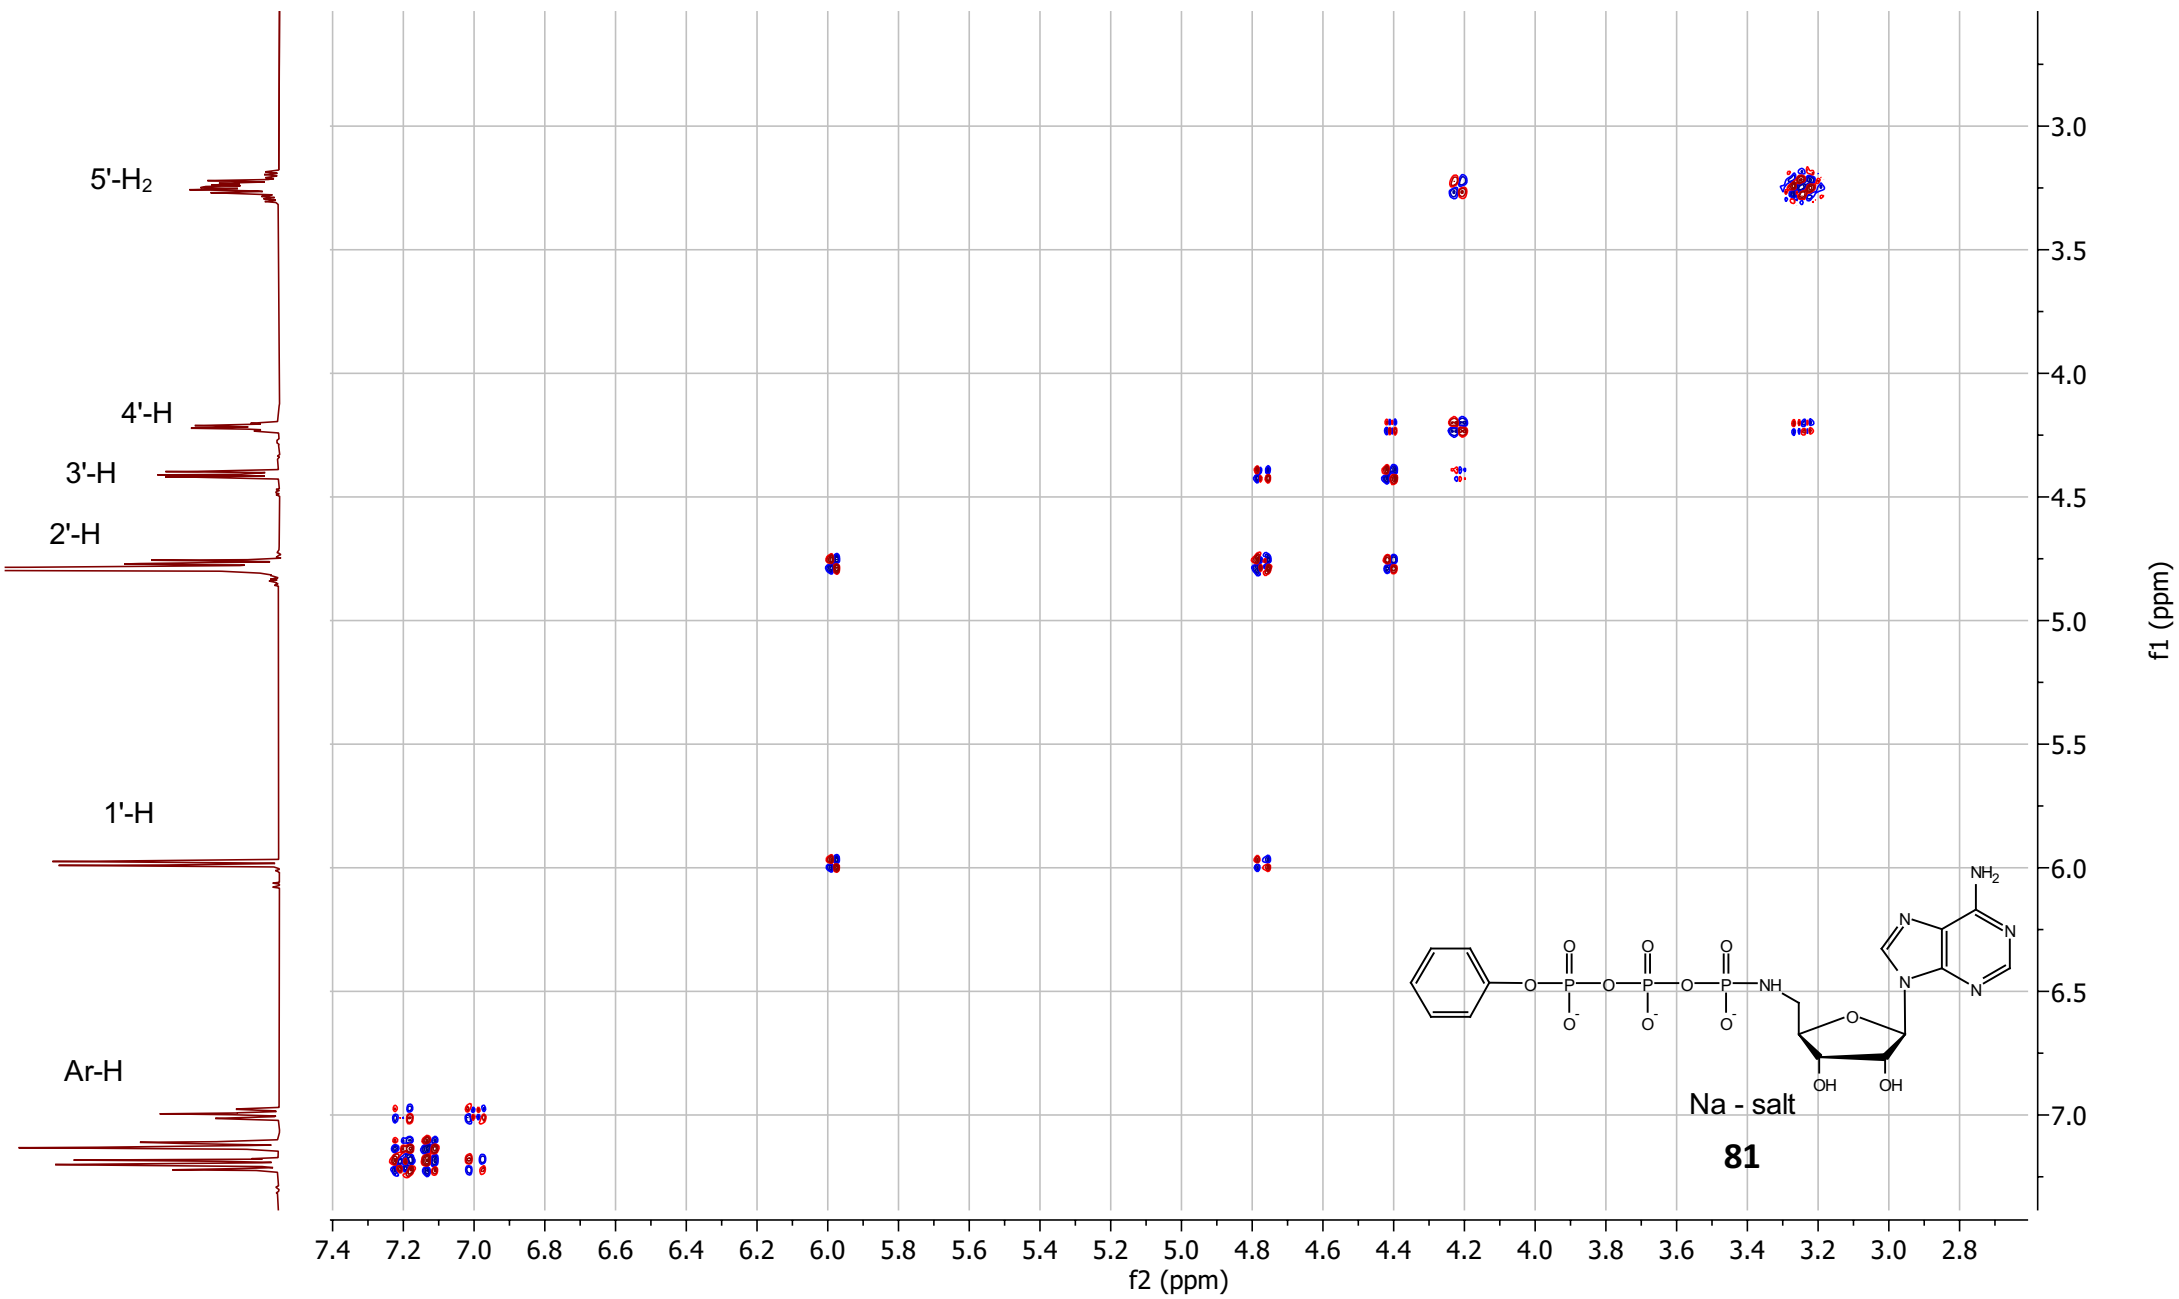

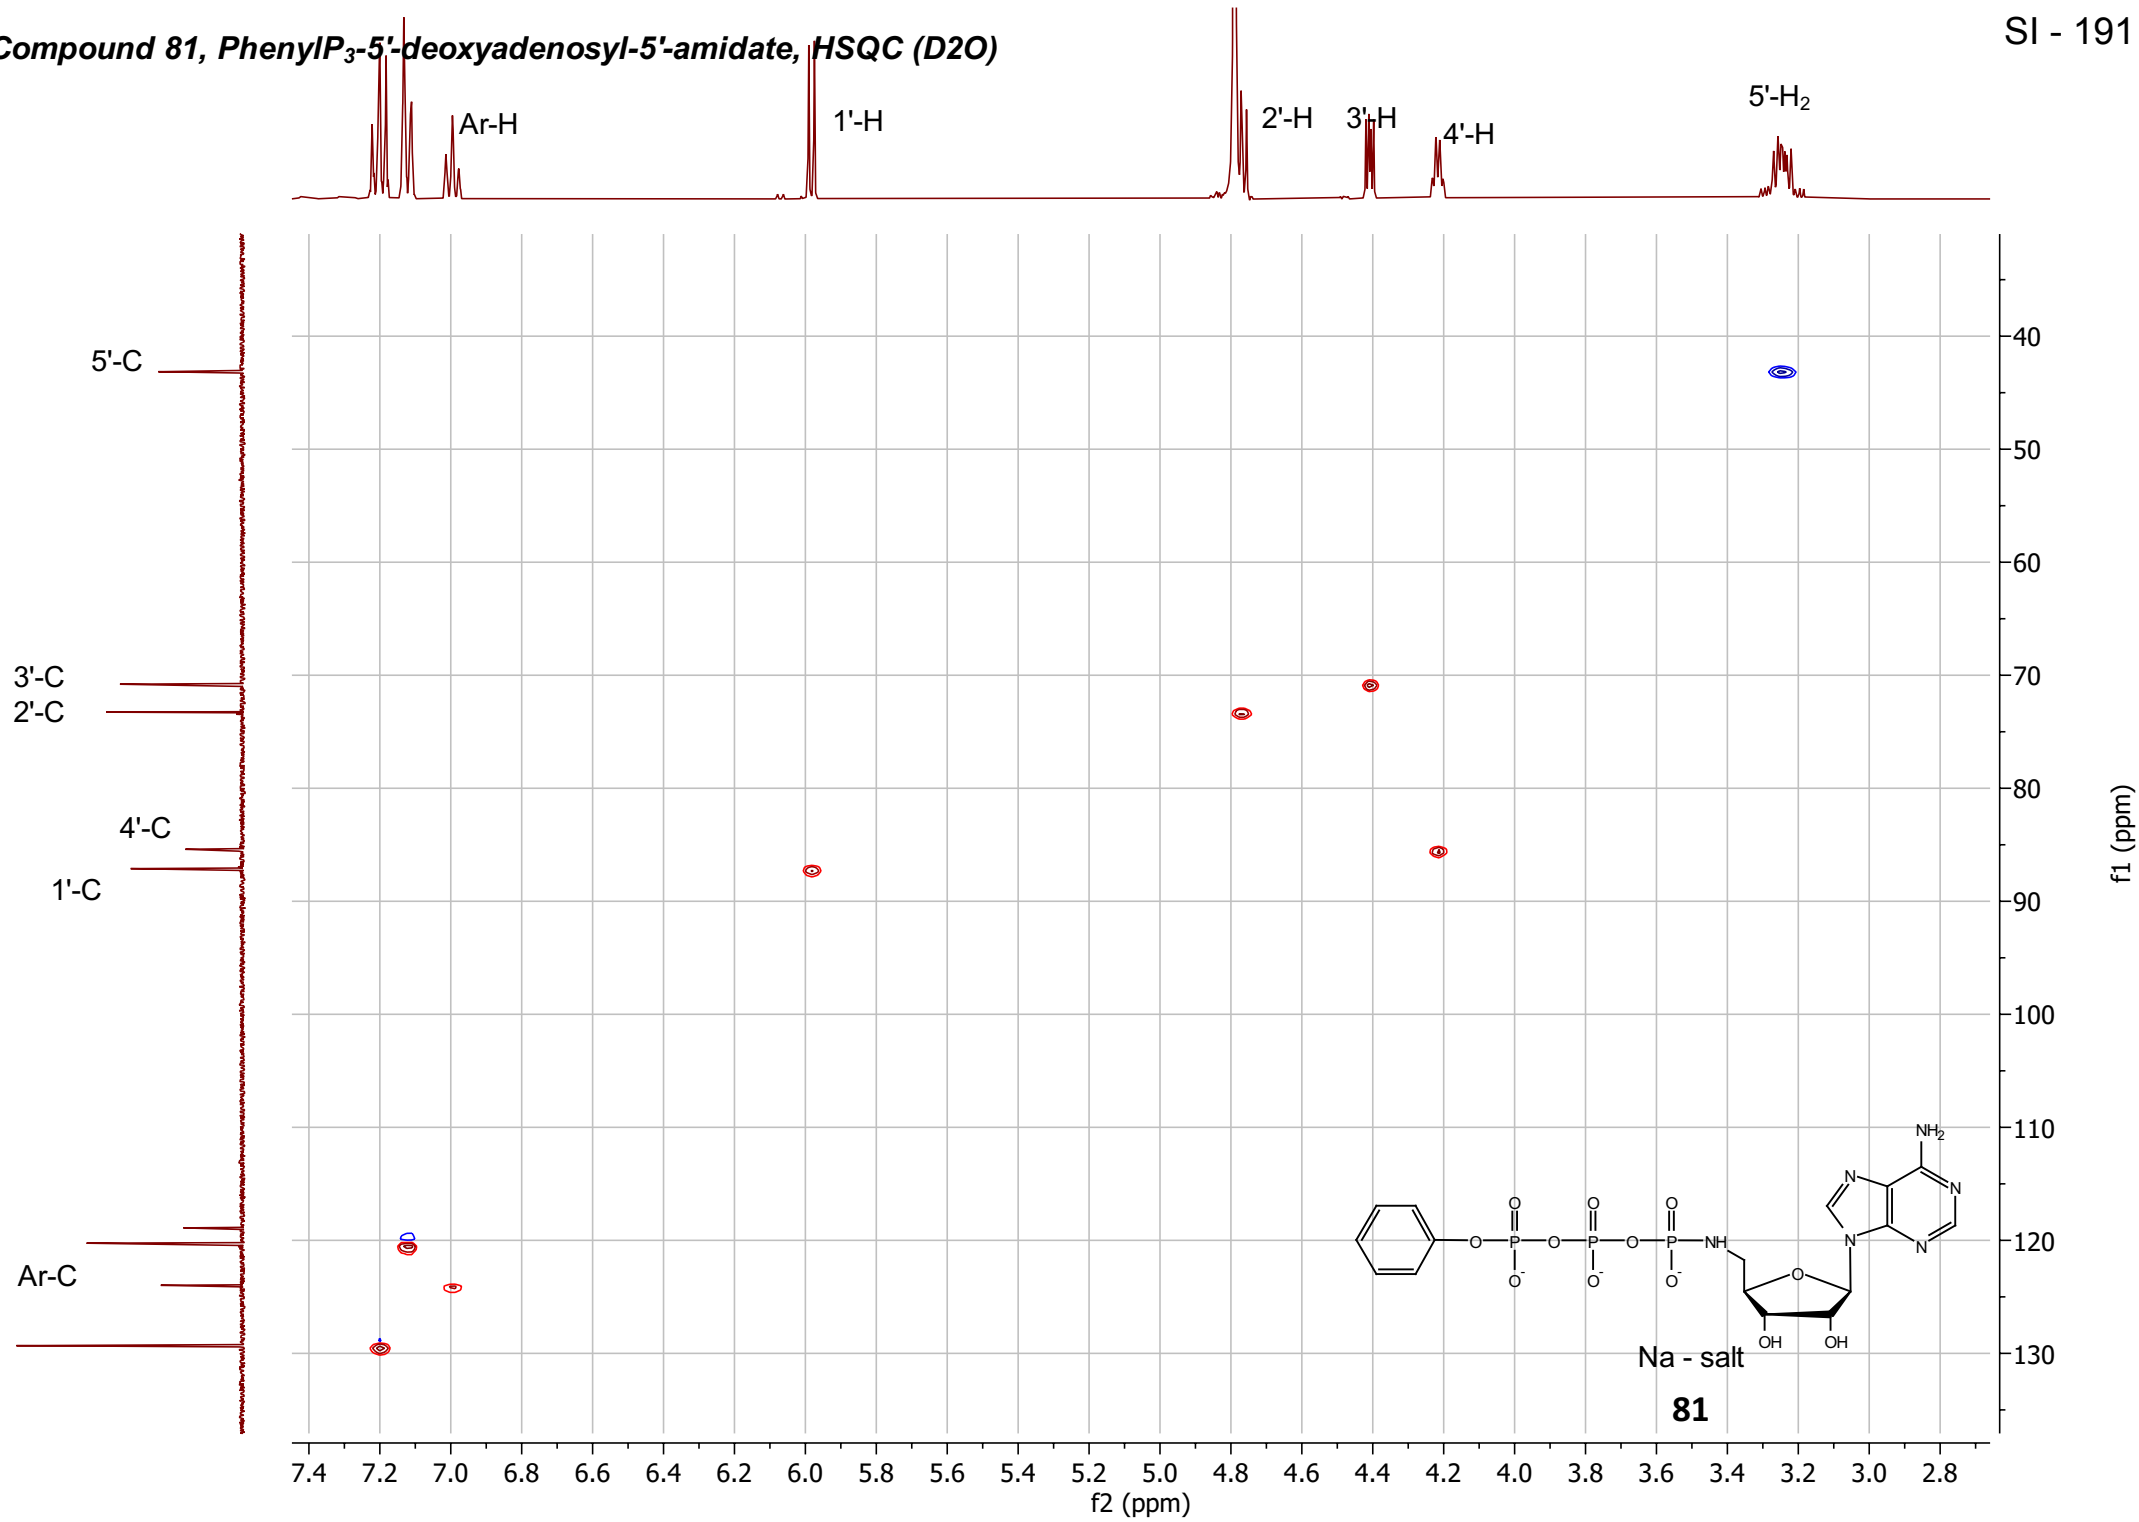

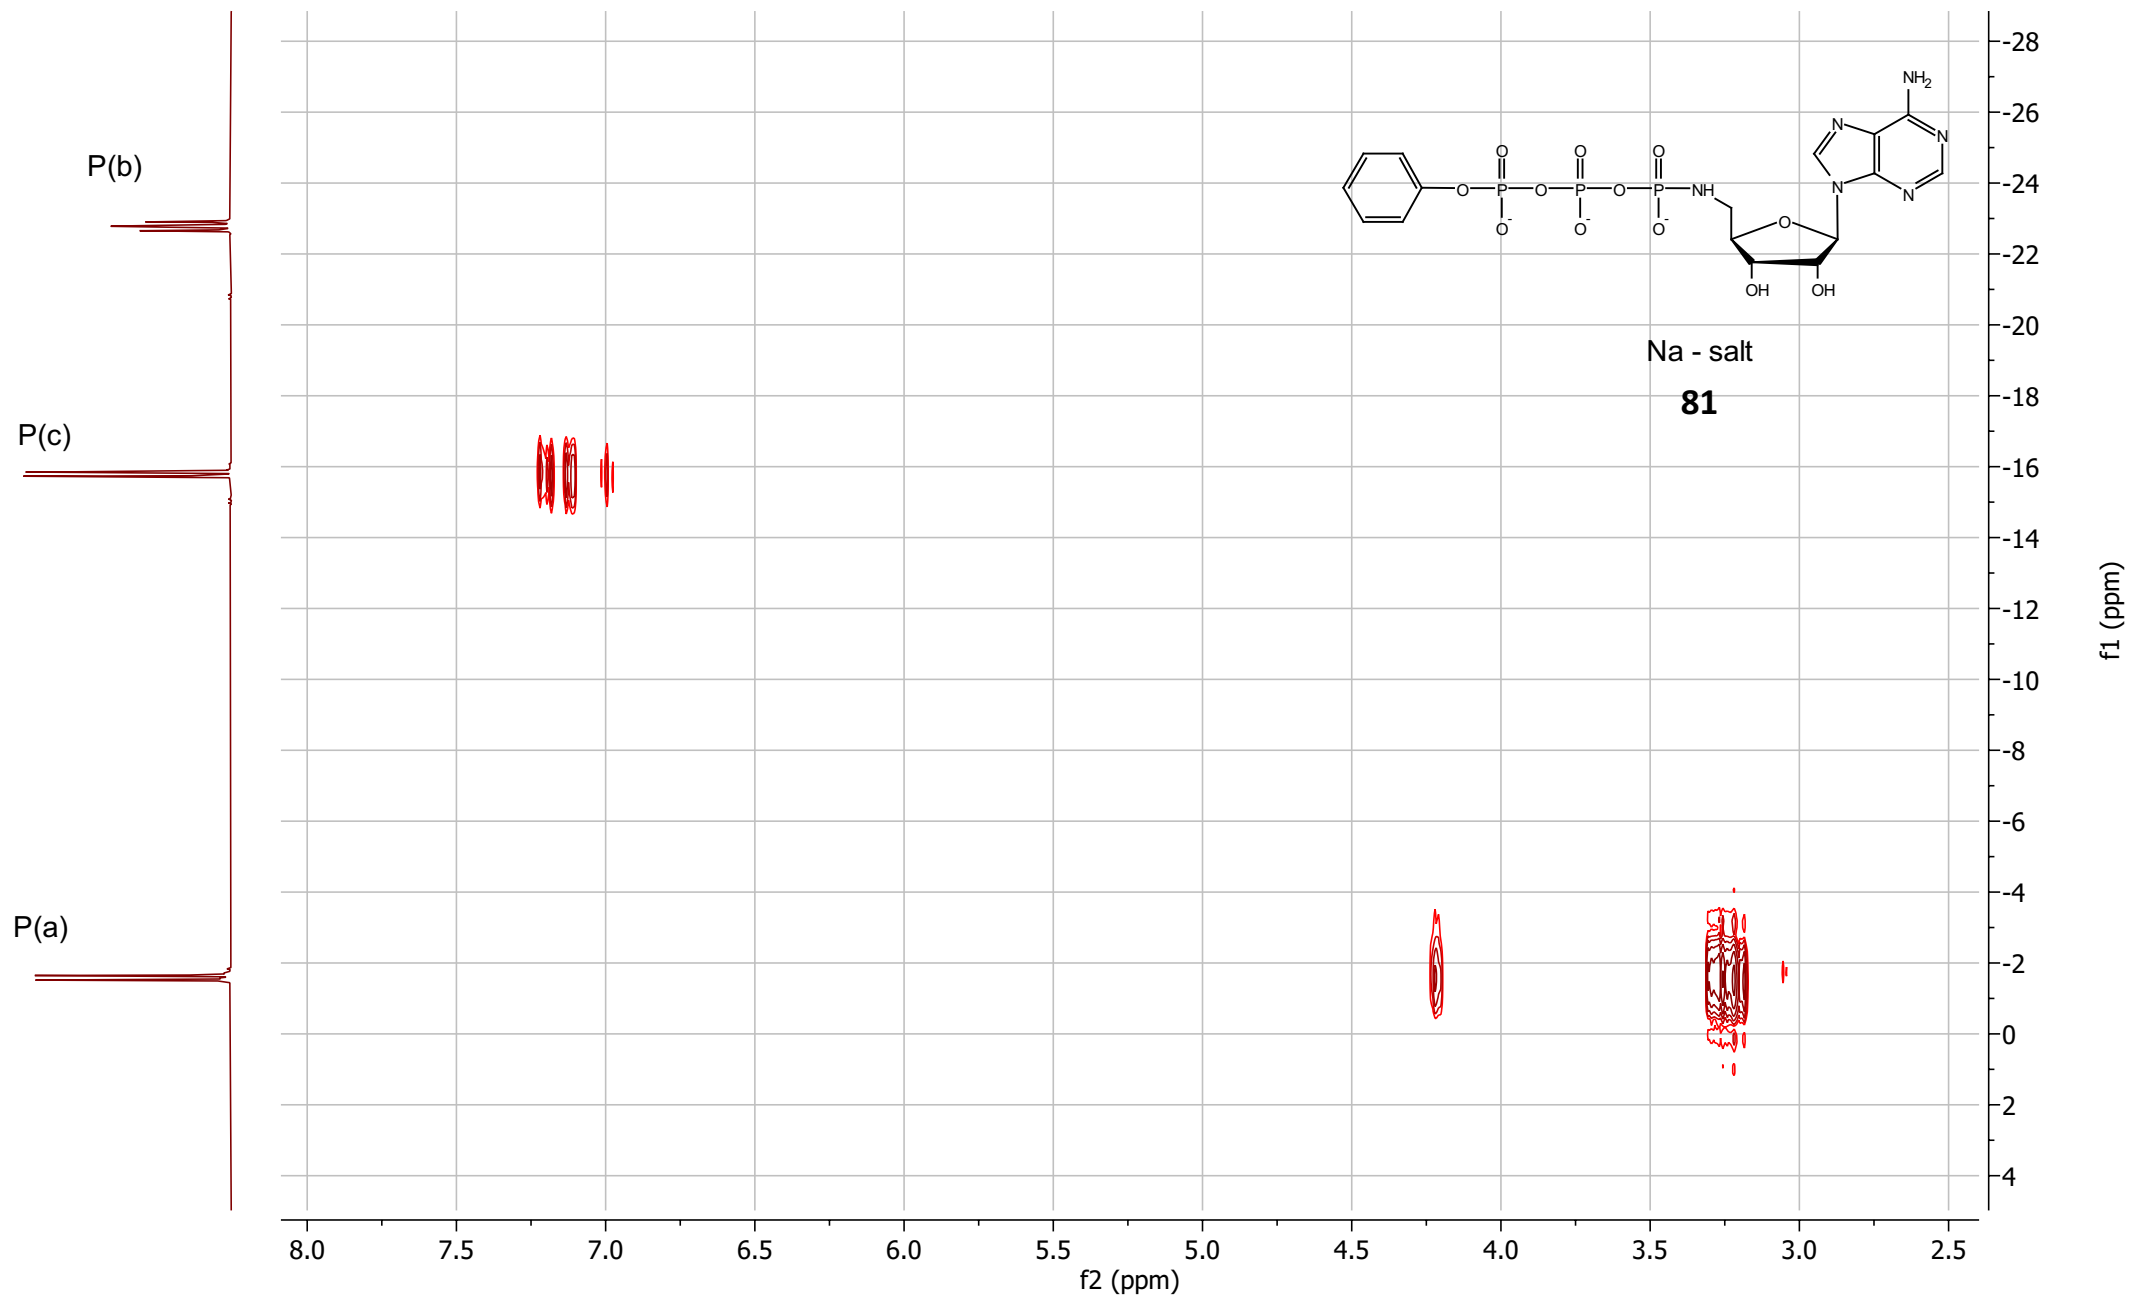

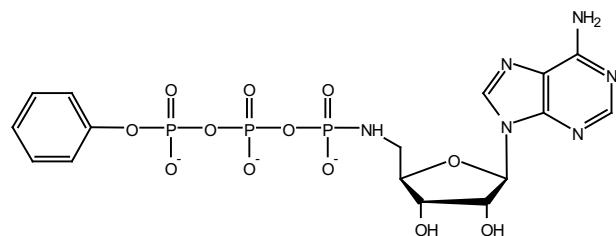

Na - salt  
**81**

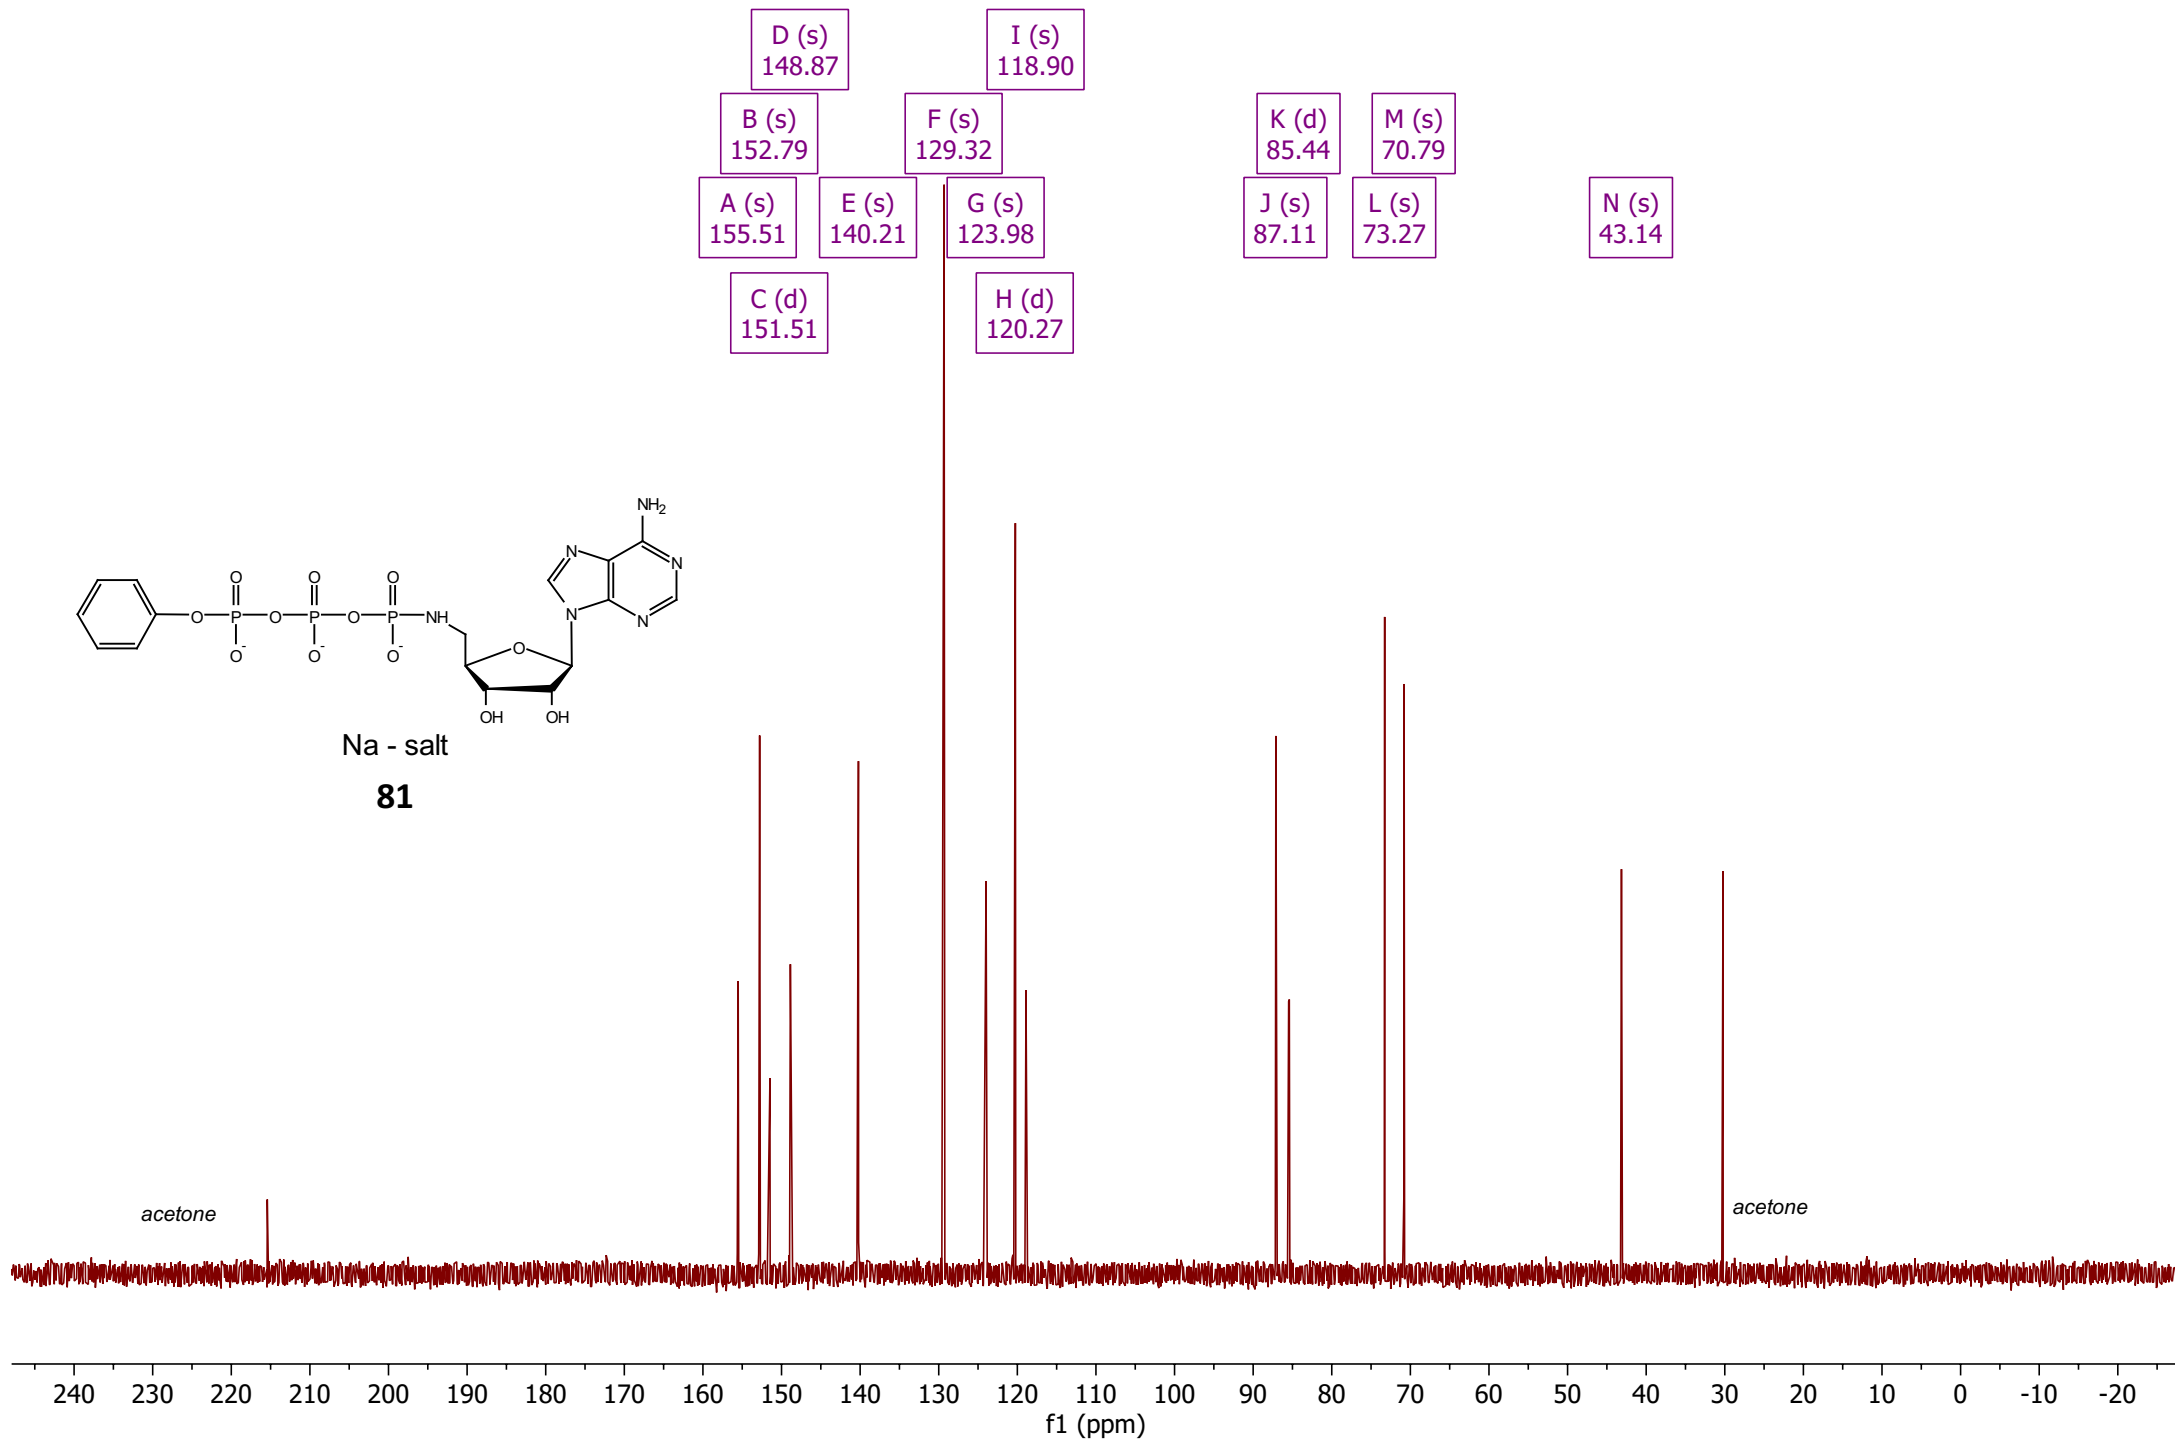

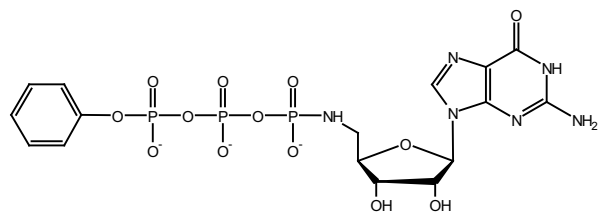

Na - salt

**82**

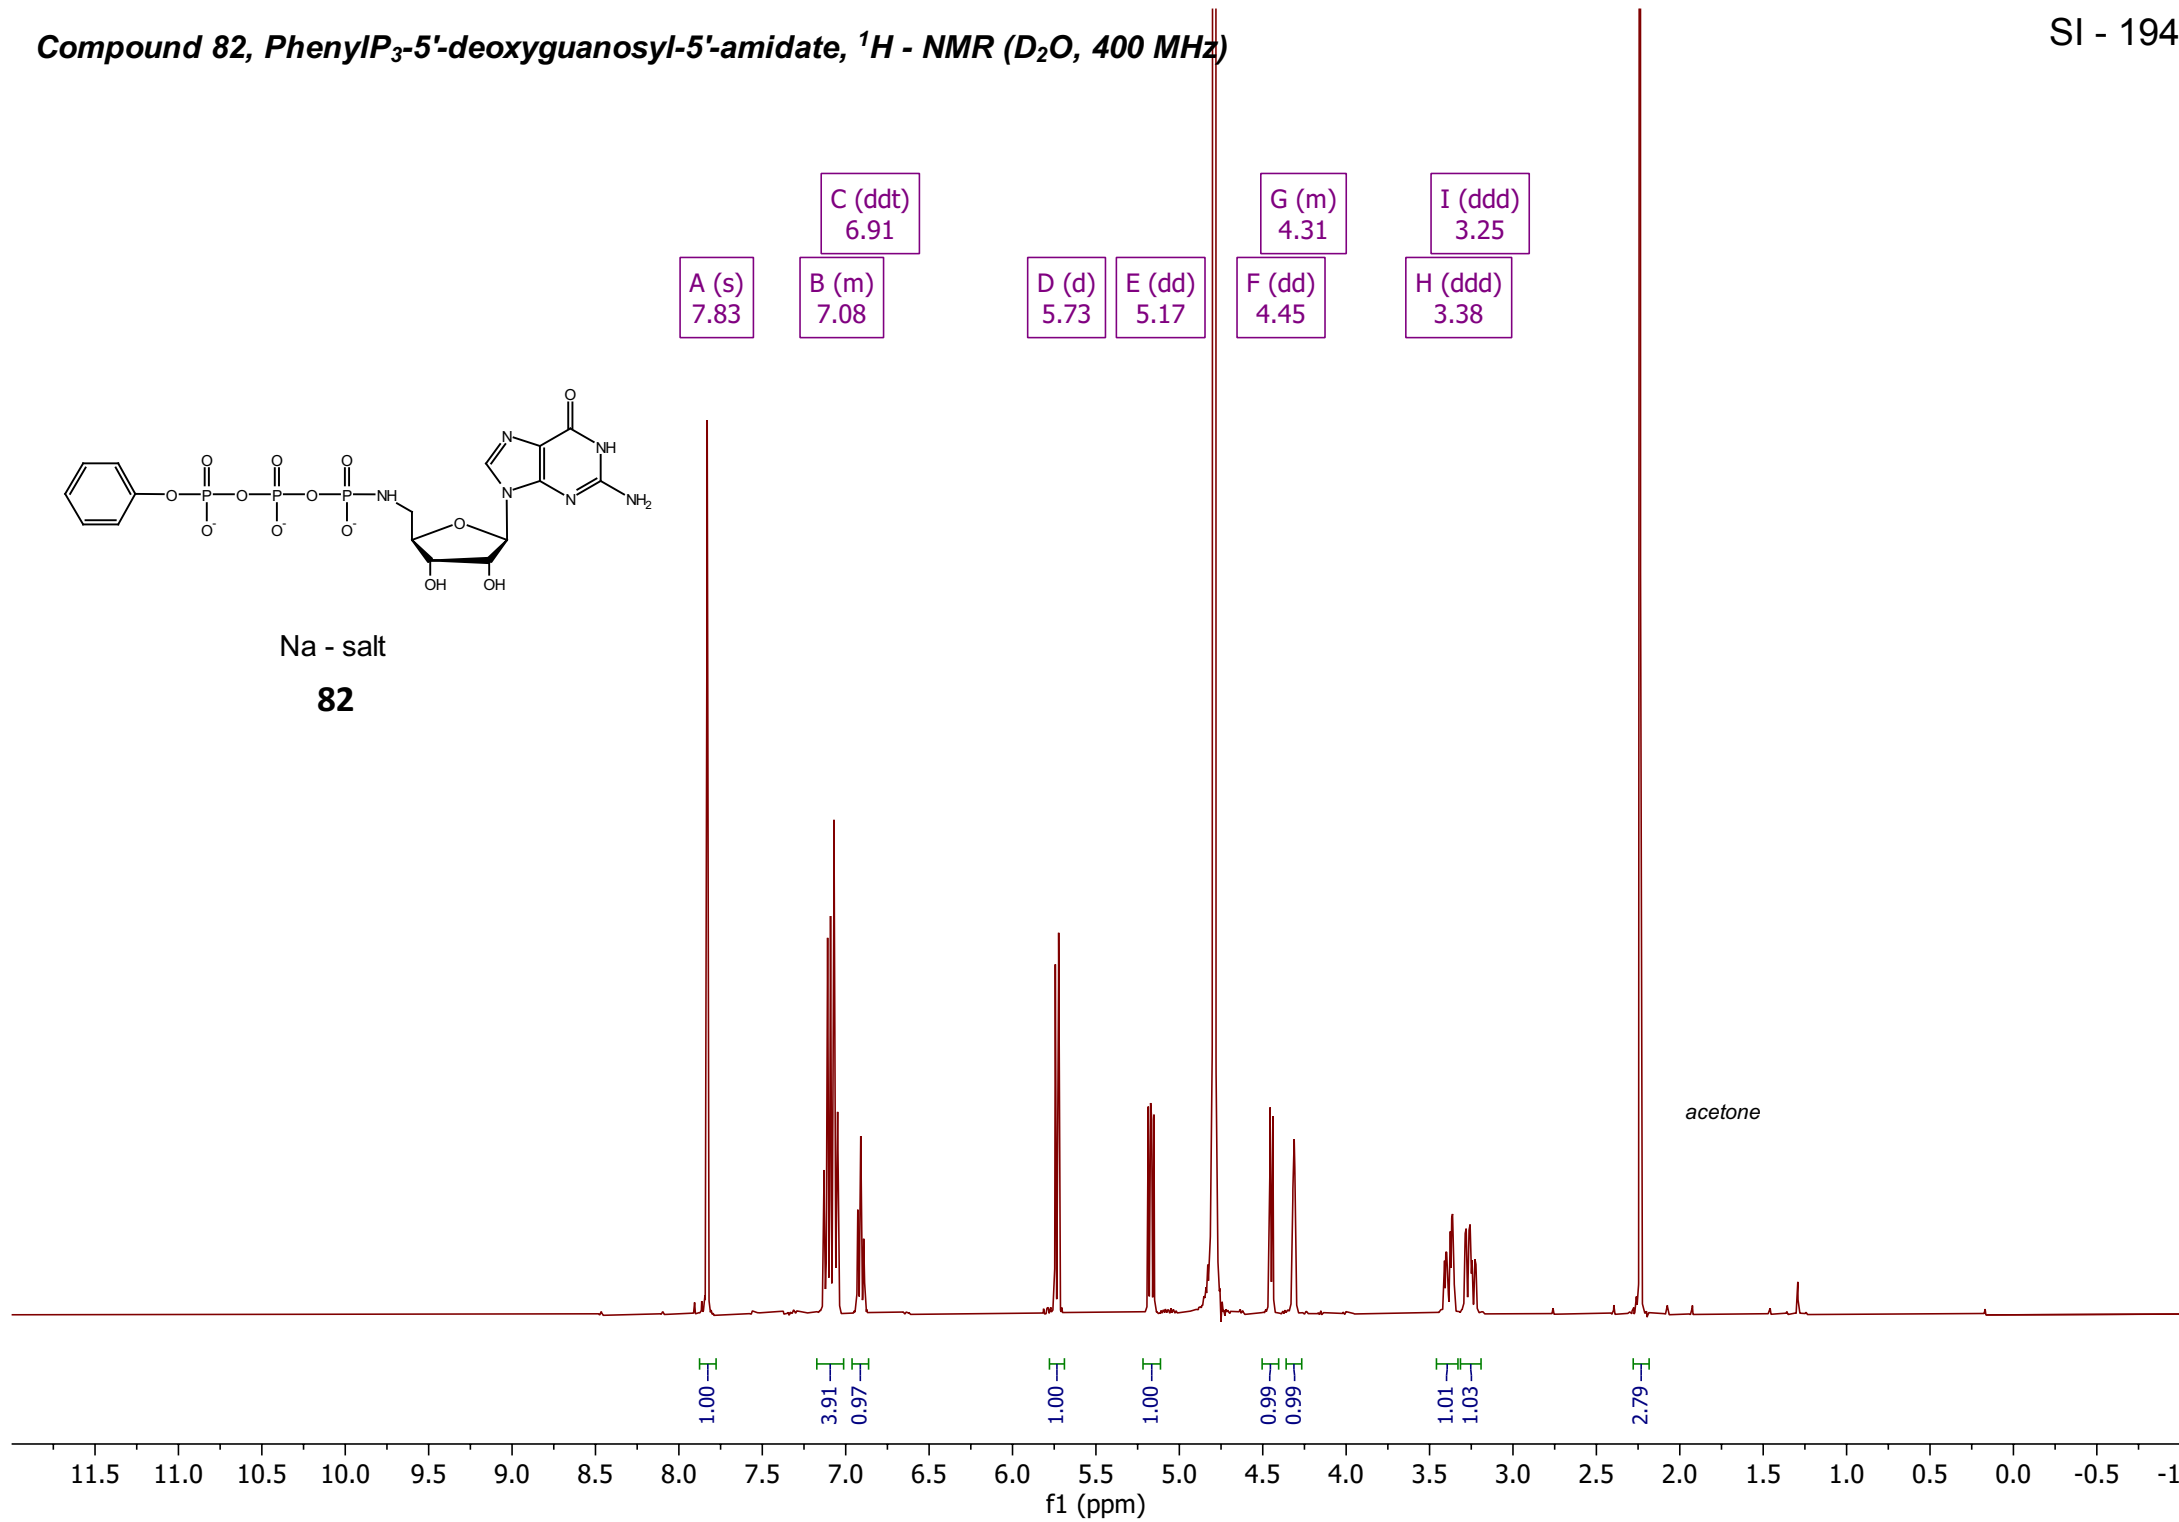

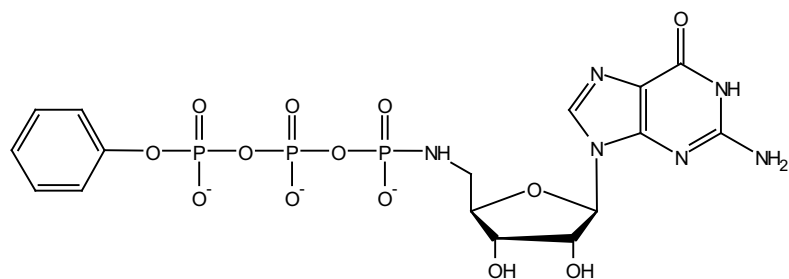

Na - salt

**82**

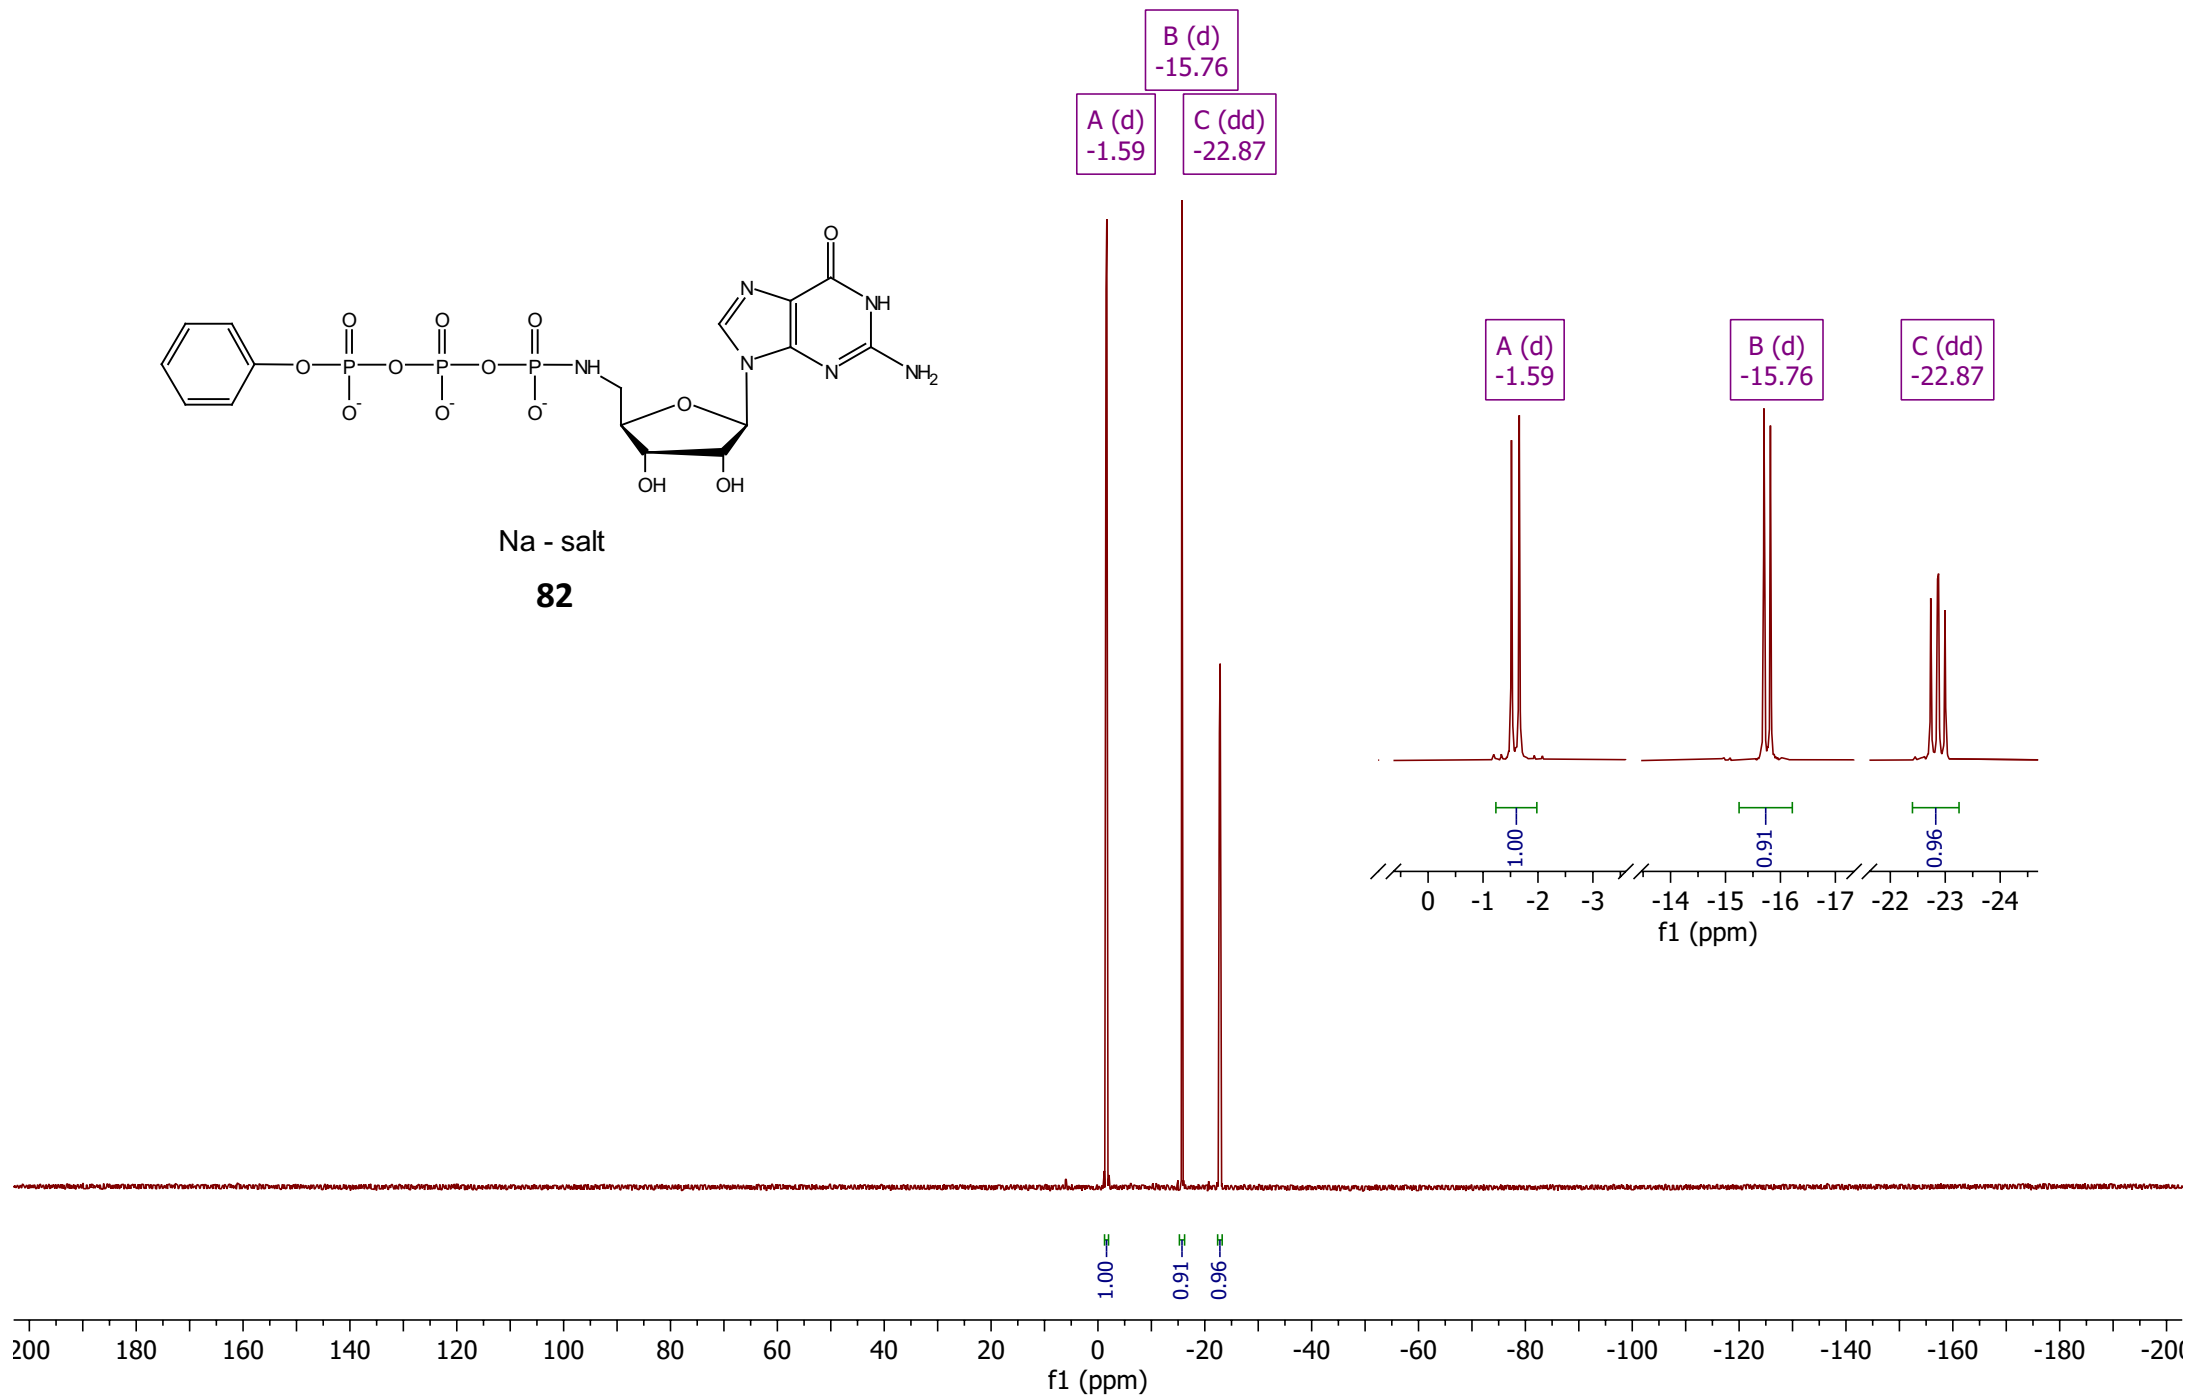

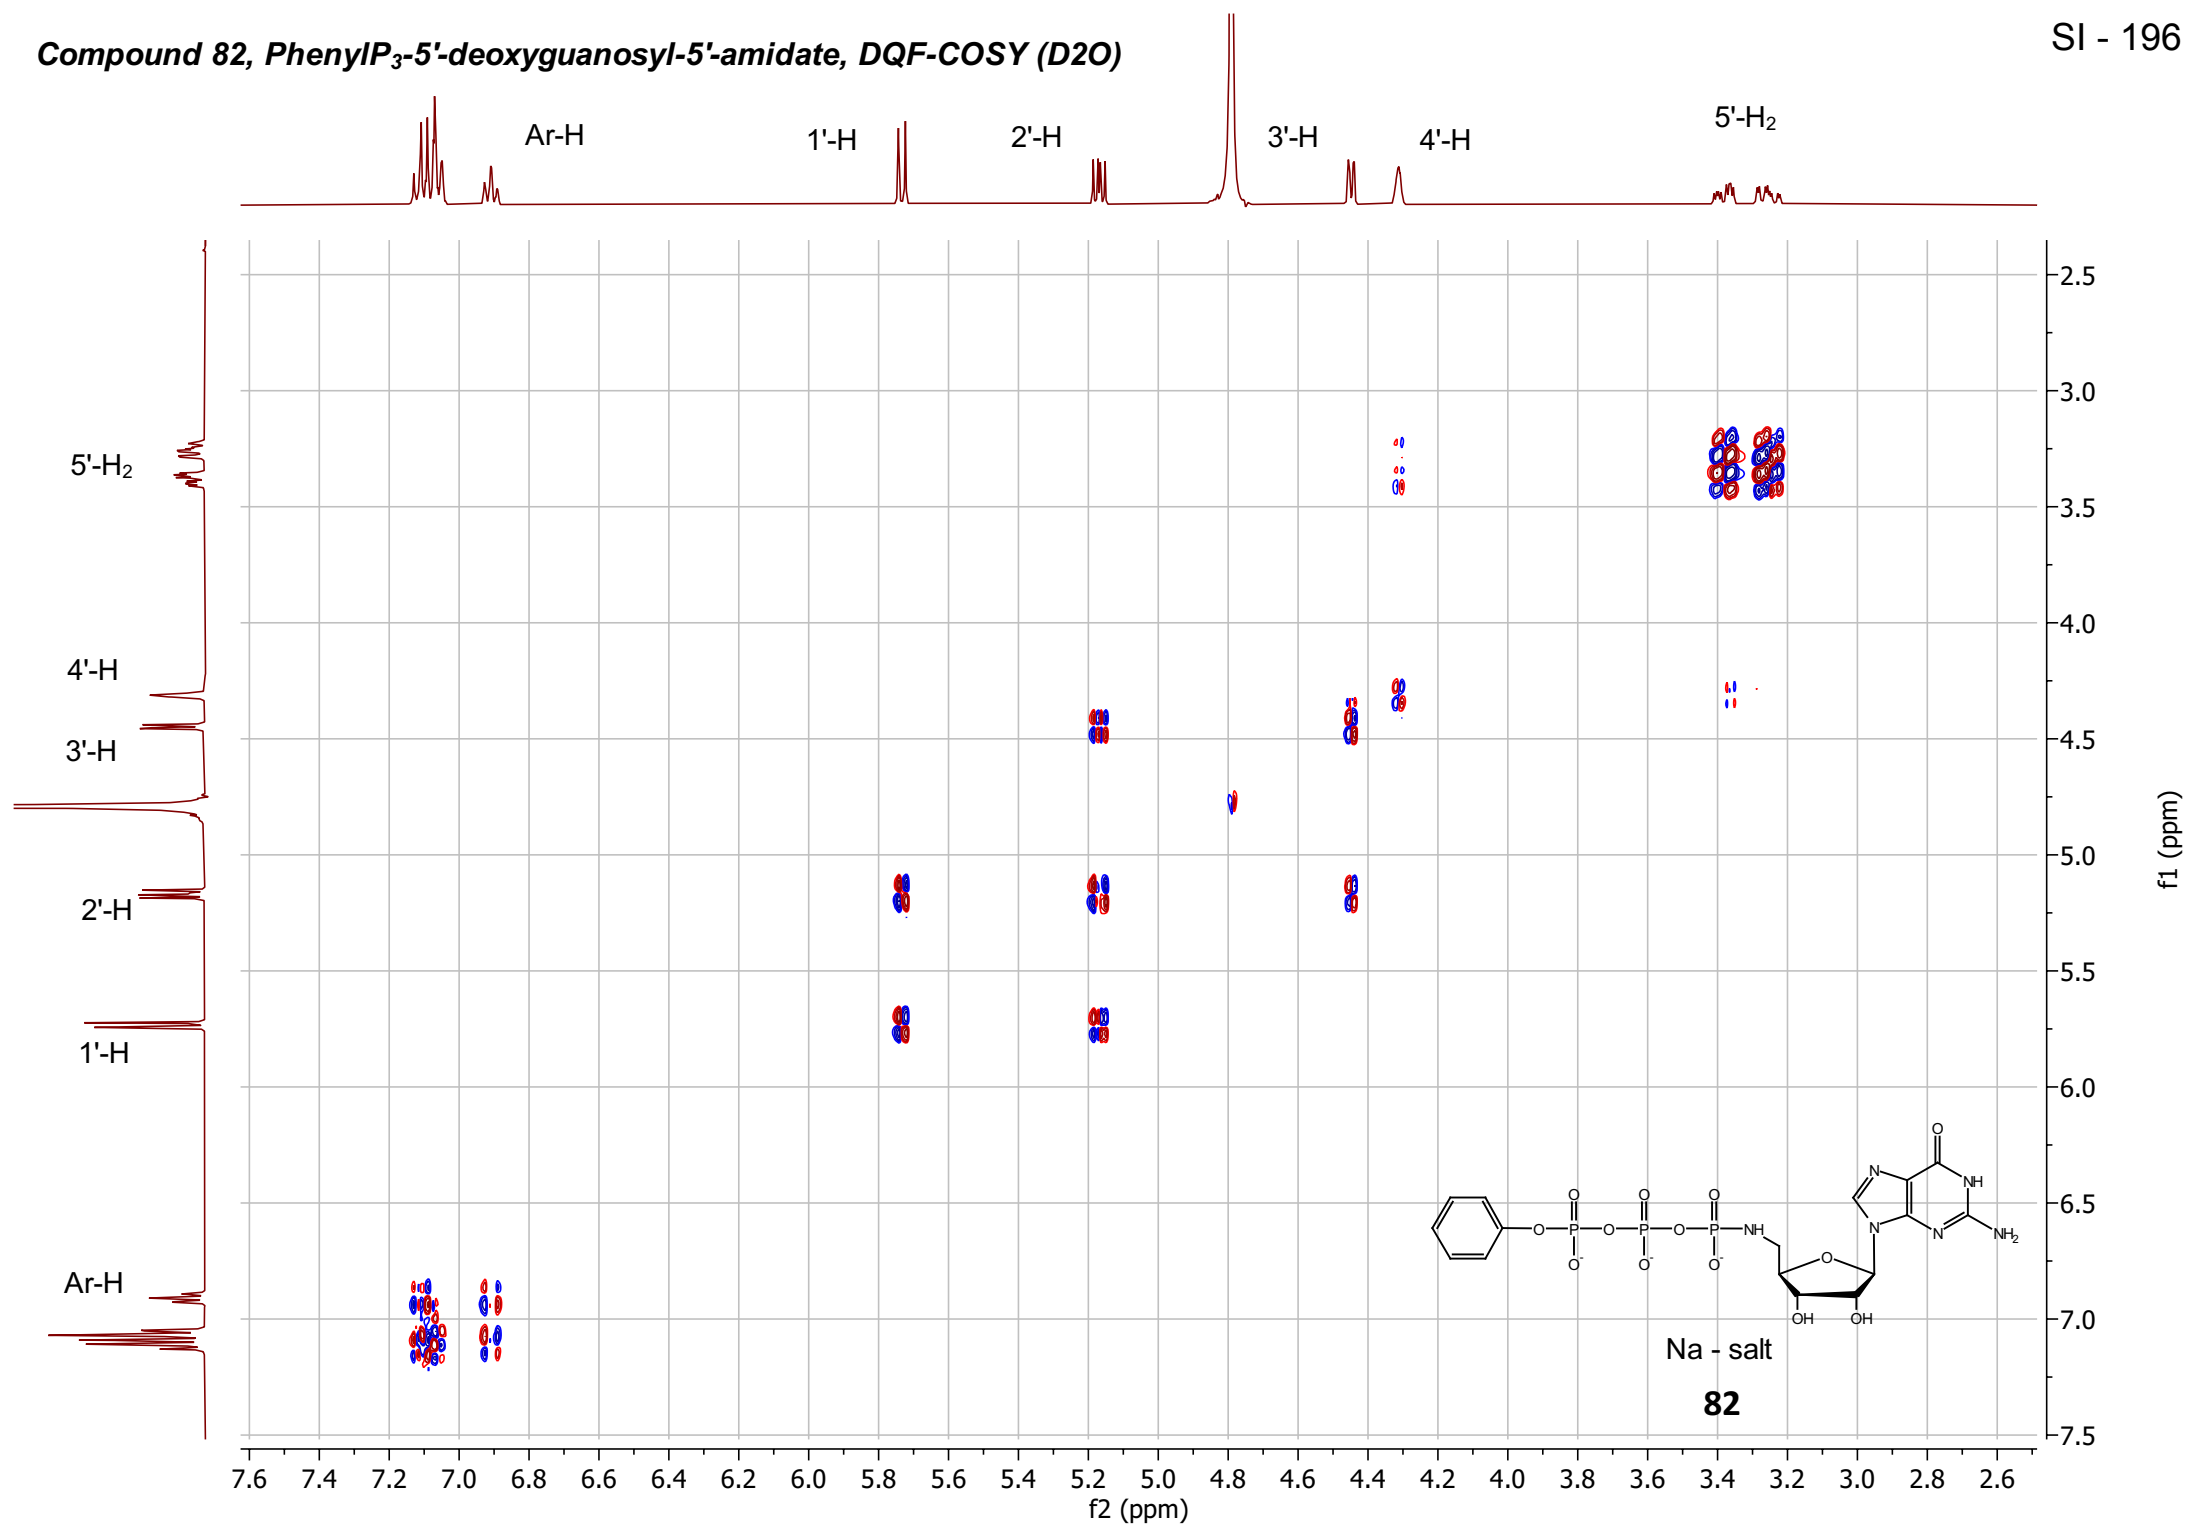

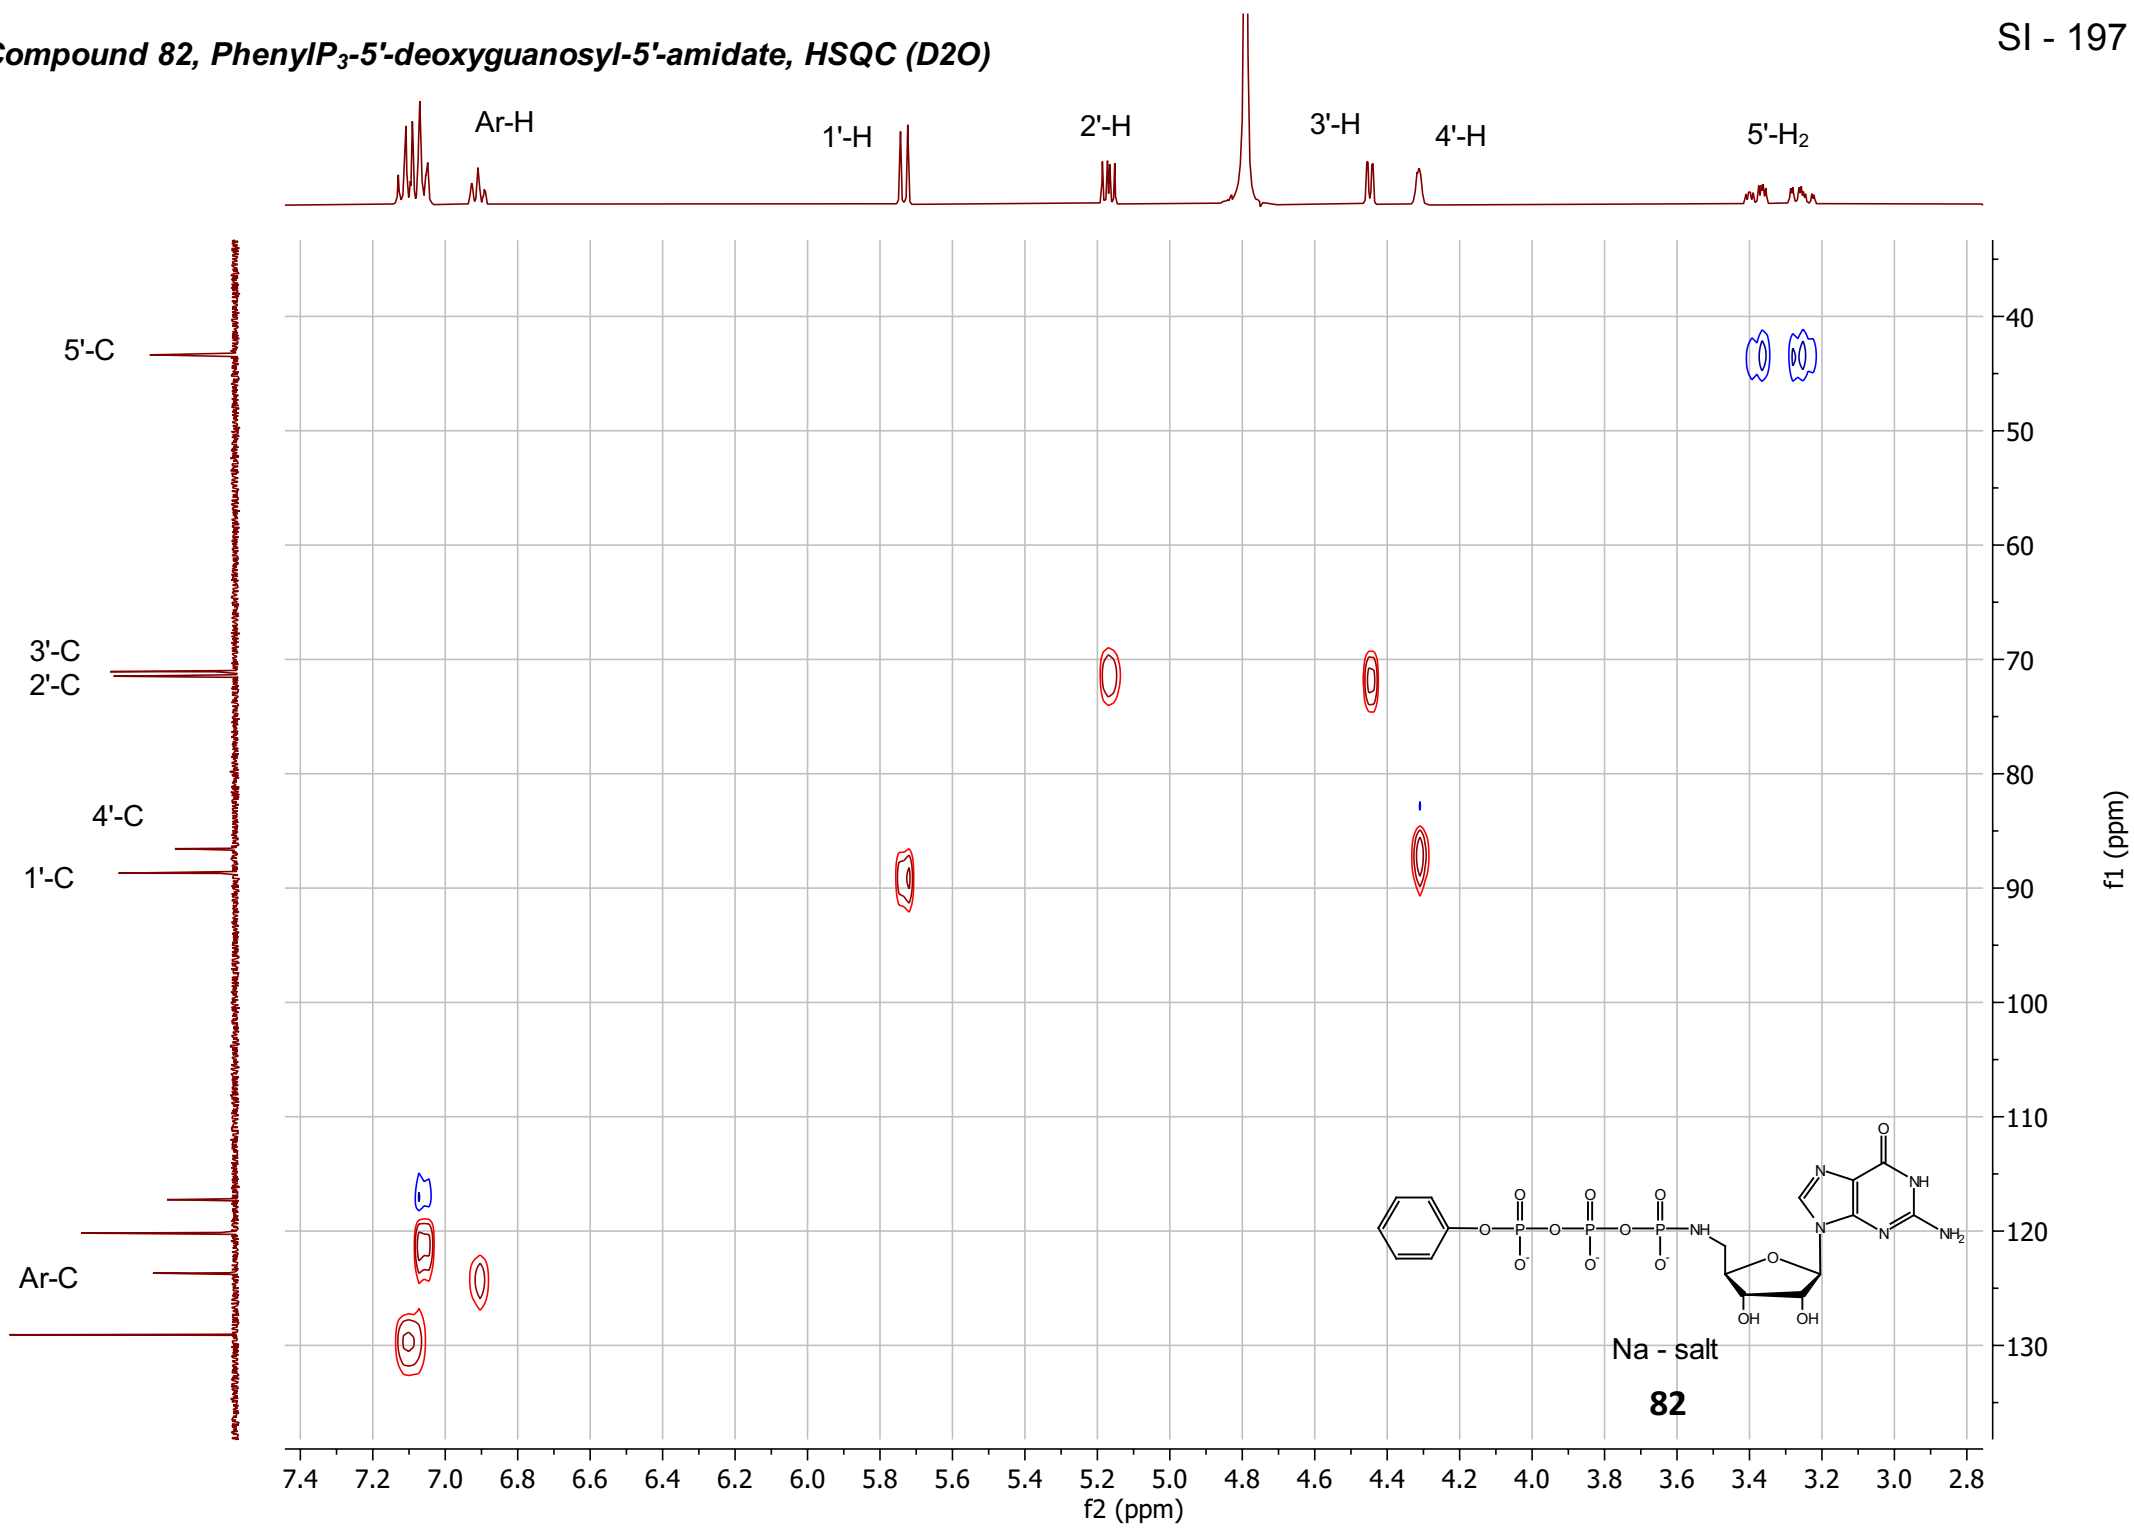



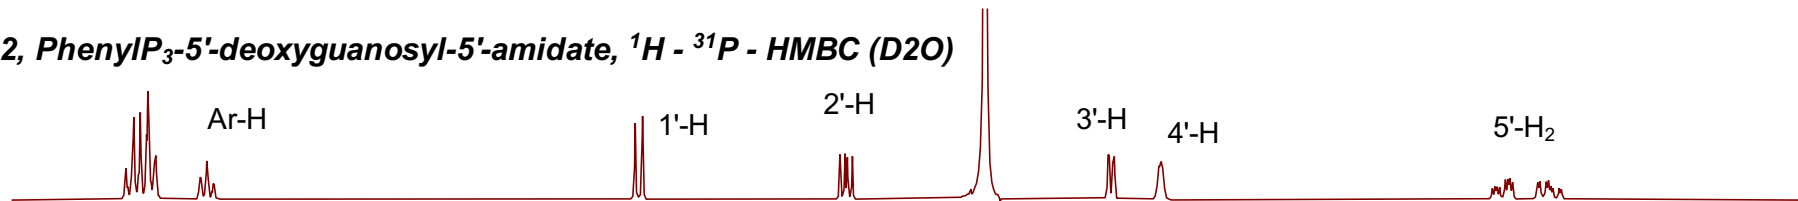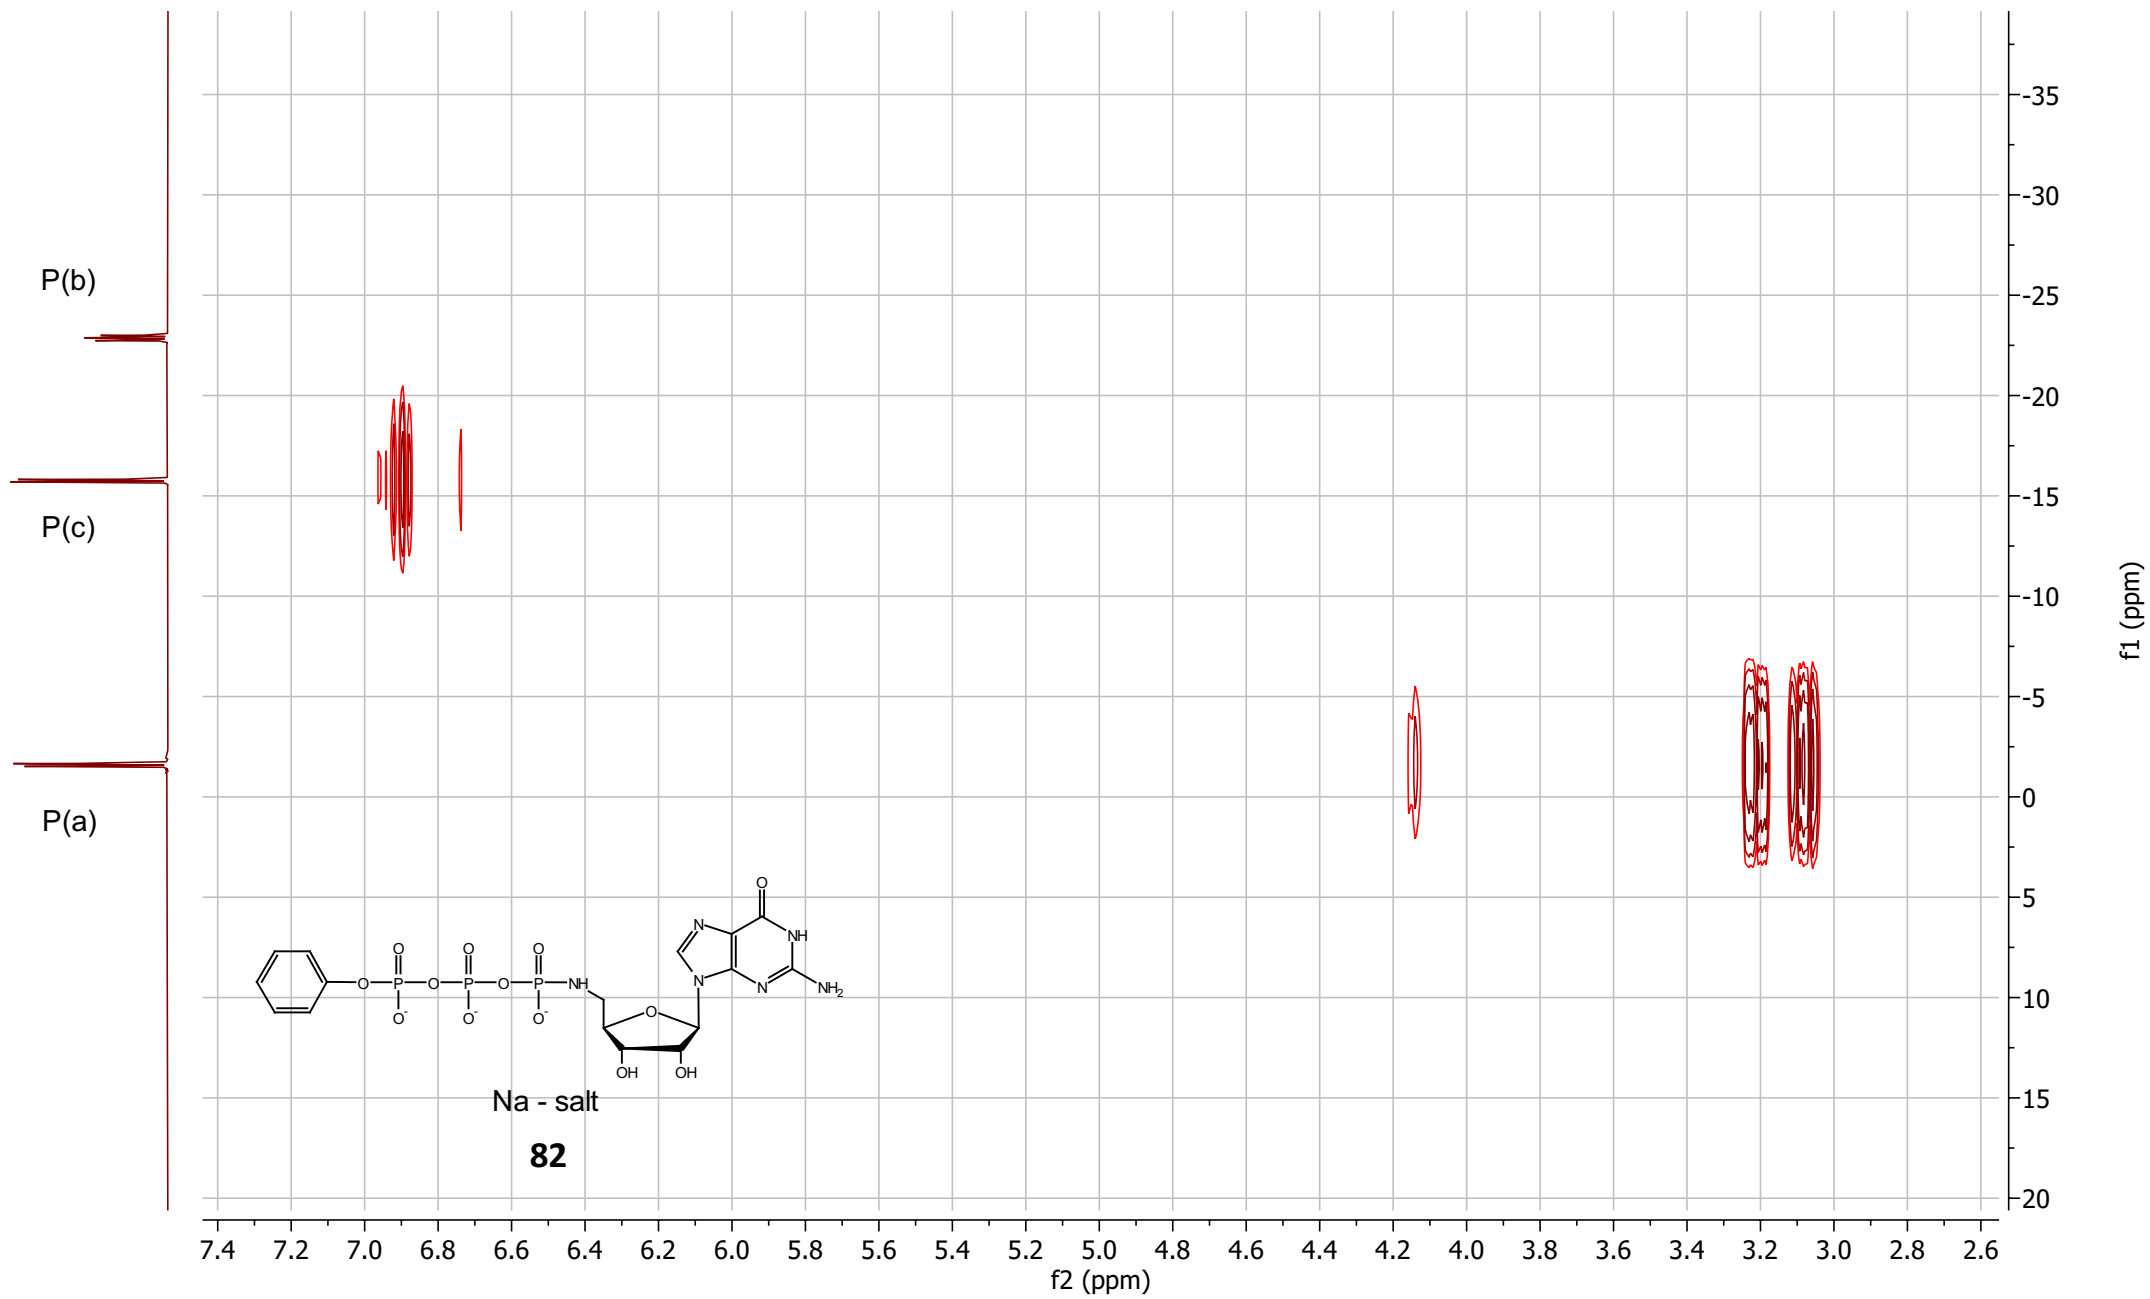

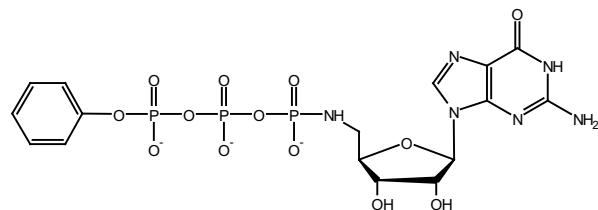

Na - salt

**82**

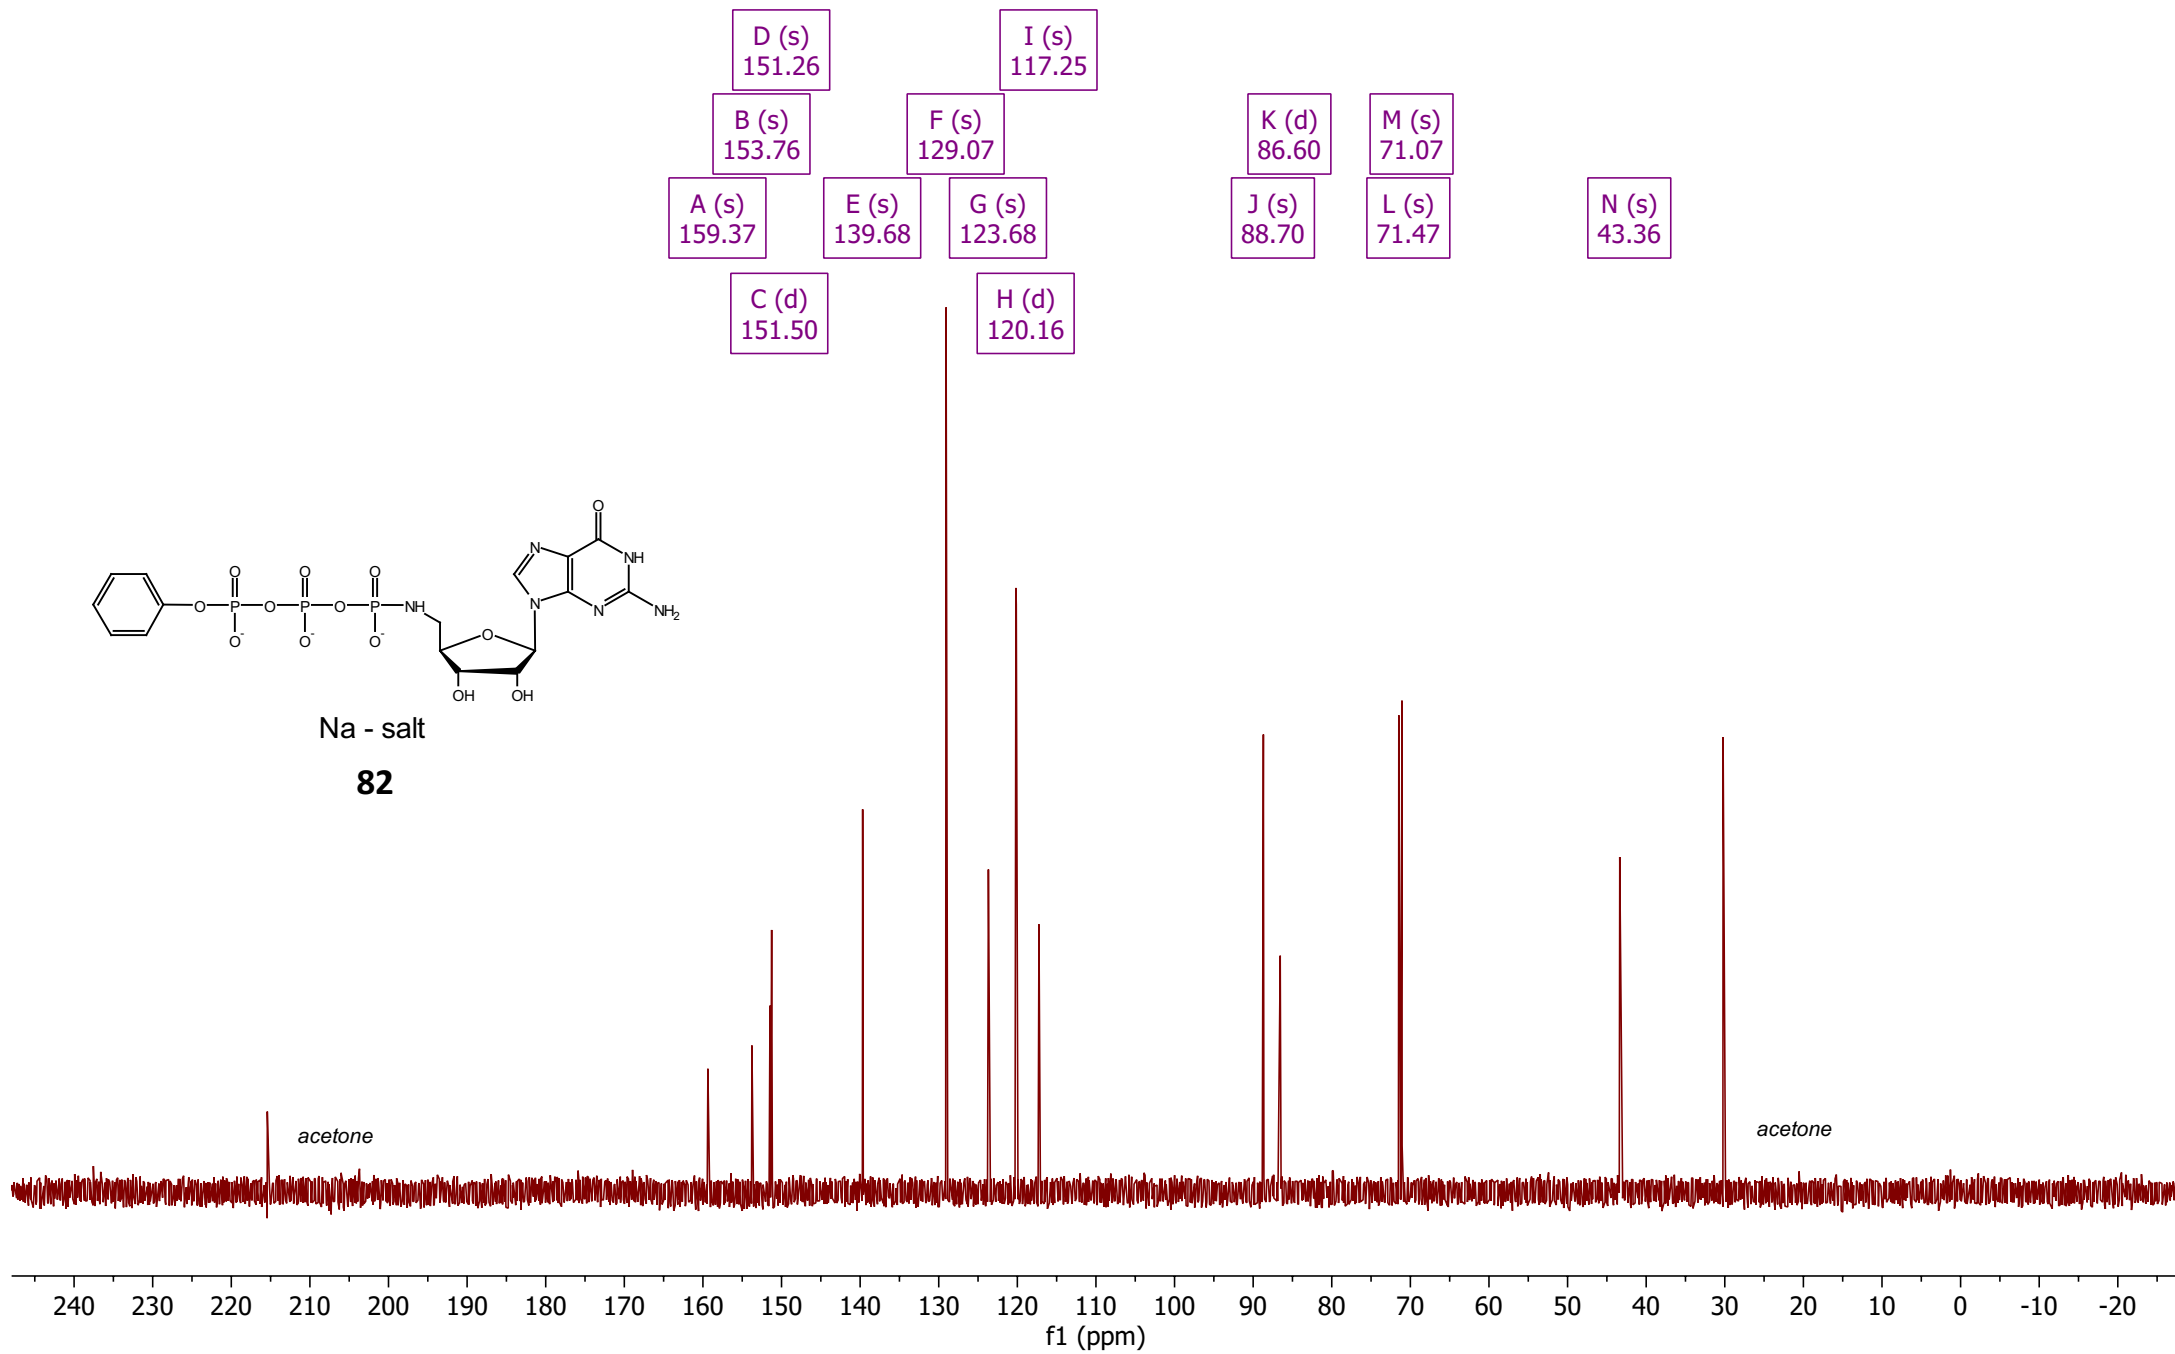

Compound 83, Napht-2-ylP<sub>3</sub>-5'-deoxyguanosyl-5'-amidate, <sup>1</sup>H - NMR (D<sub>2</sub>O, 400 MHz)

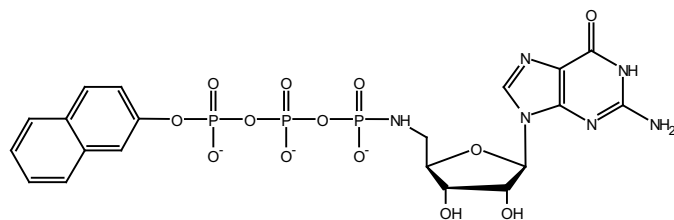

Na - salt

**83**

- J (m) 7.31
- H (s) 7.67
- G (d) 7.69
- I (m) 7.26
- K (m) 7.61
- B (d) 5.64
- A (dd) 5.02
- D (t) 4.33
- C (dd) 4.40
- F (ddd) 3.29
- E (ddd) 3.48

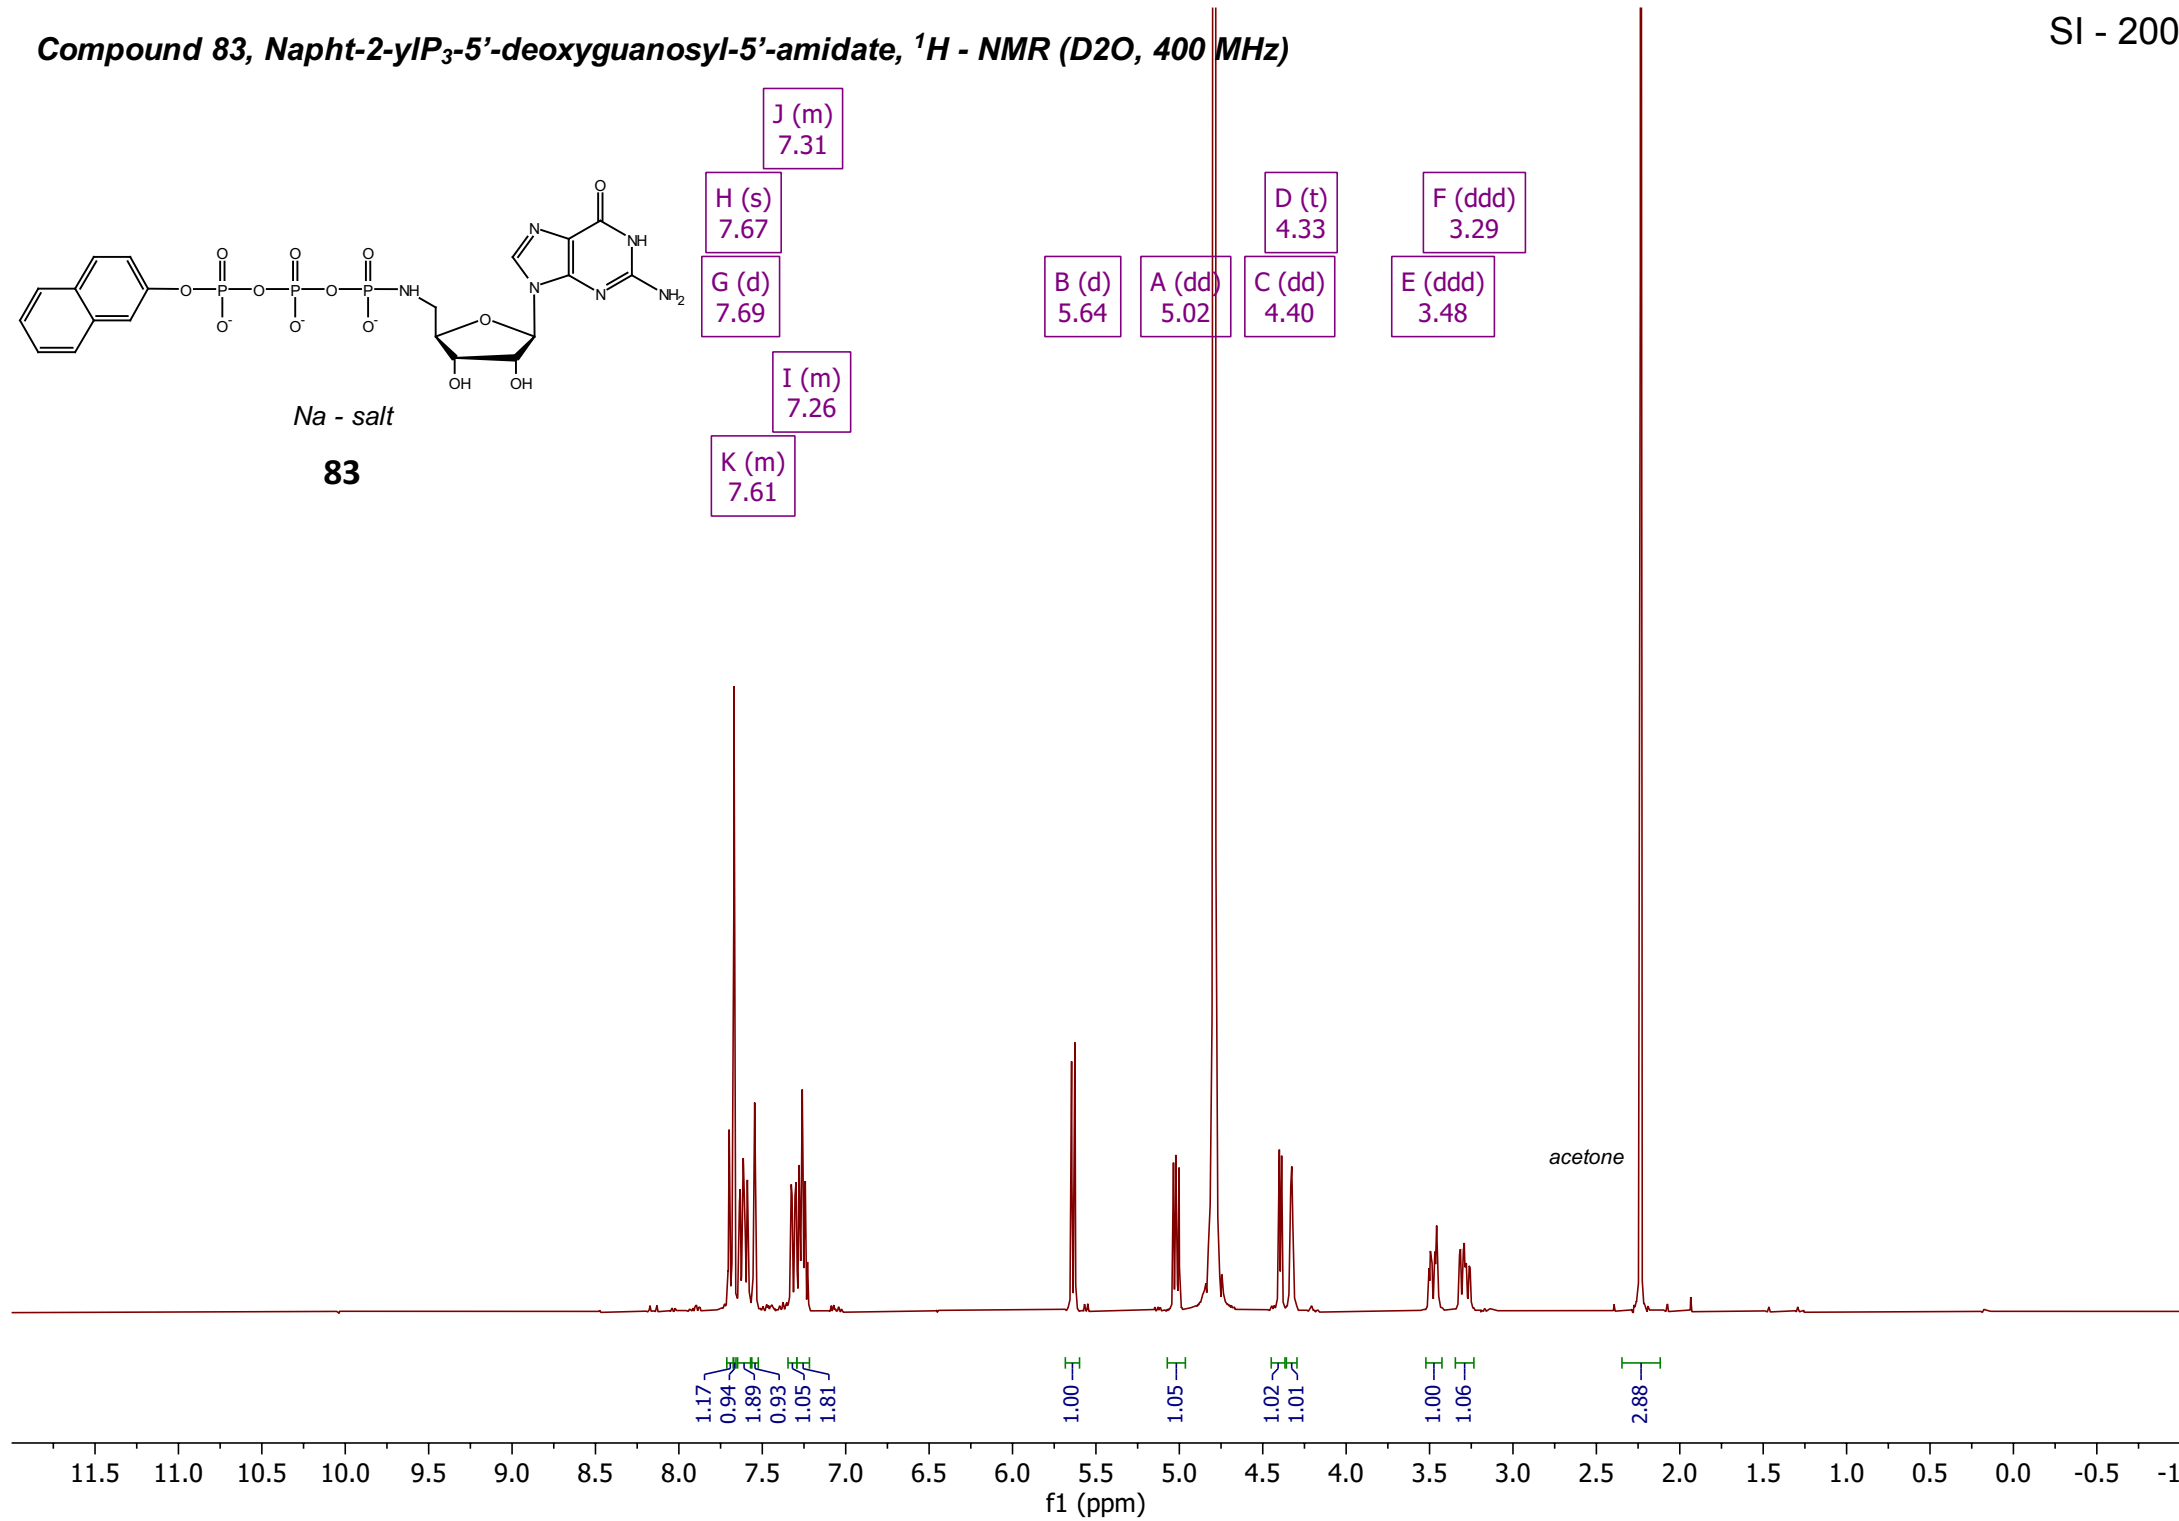

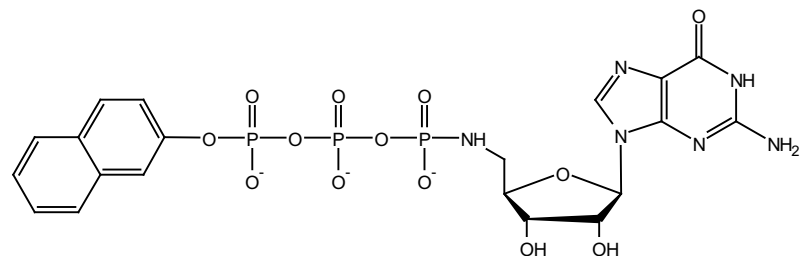

Na - salt

**83**

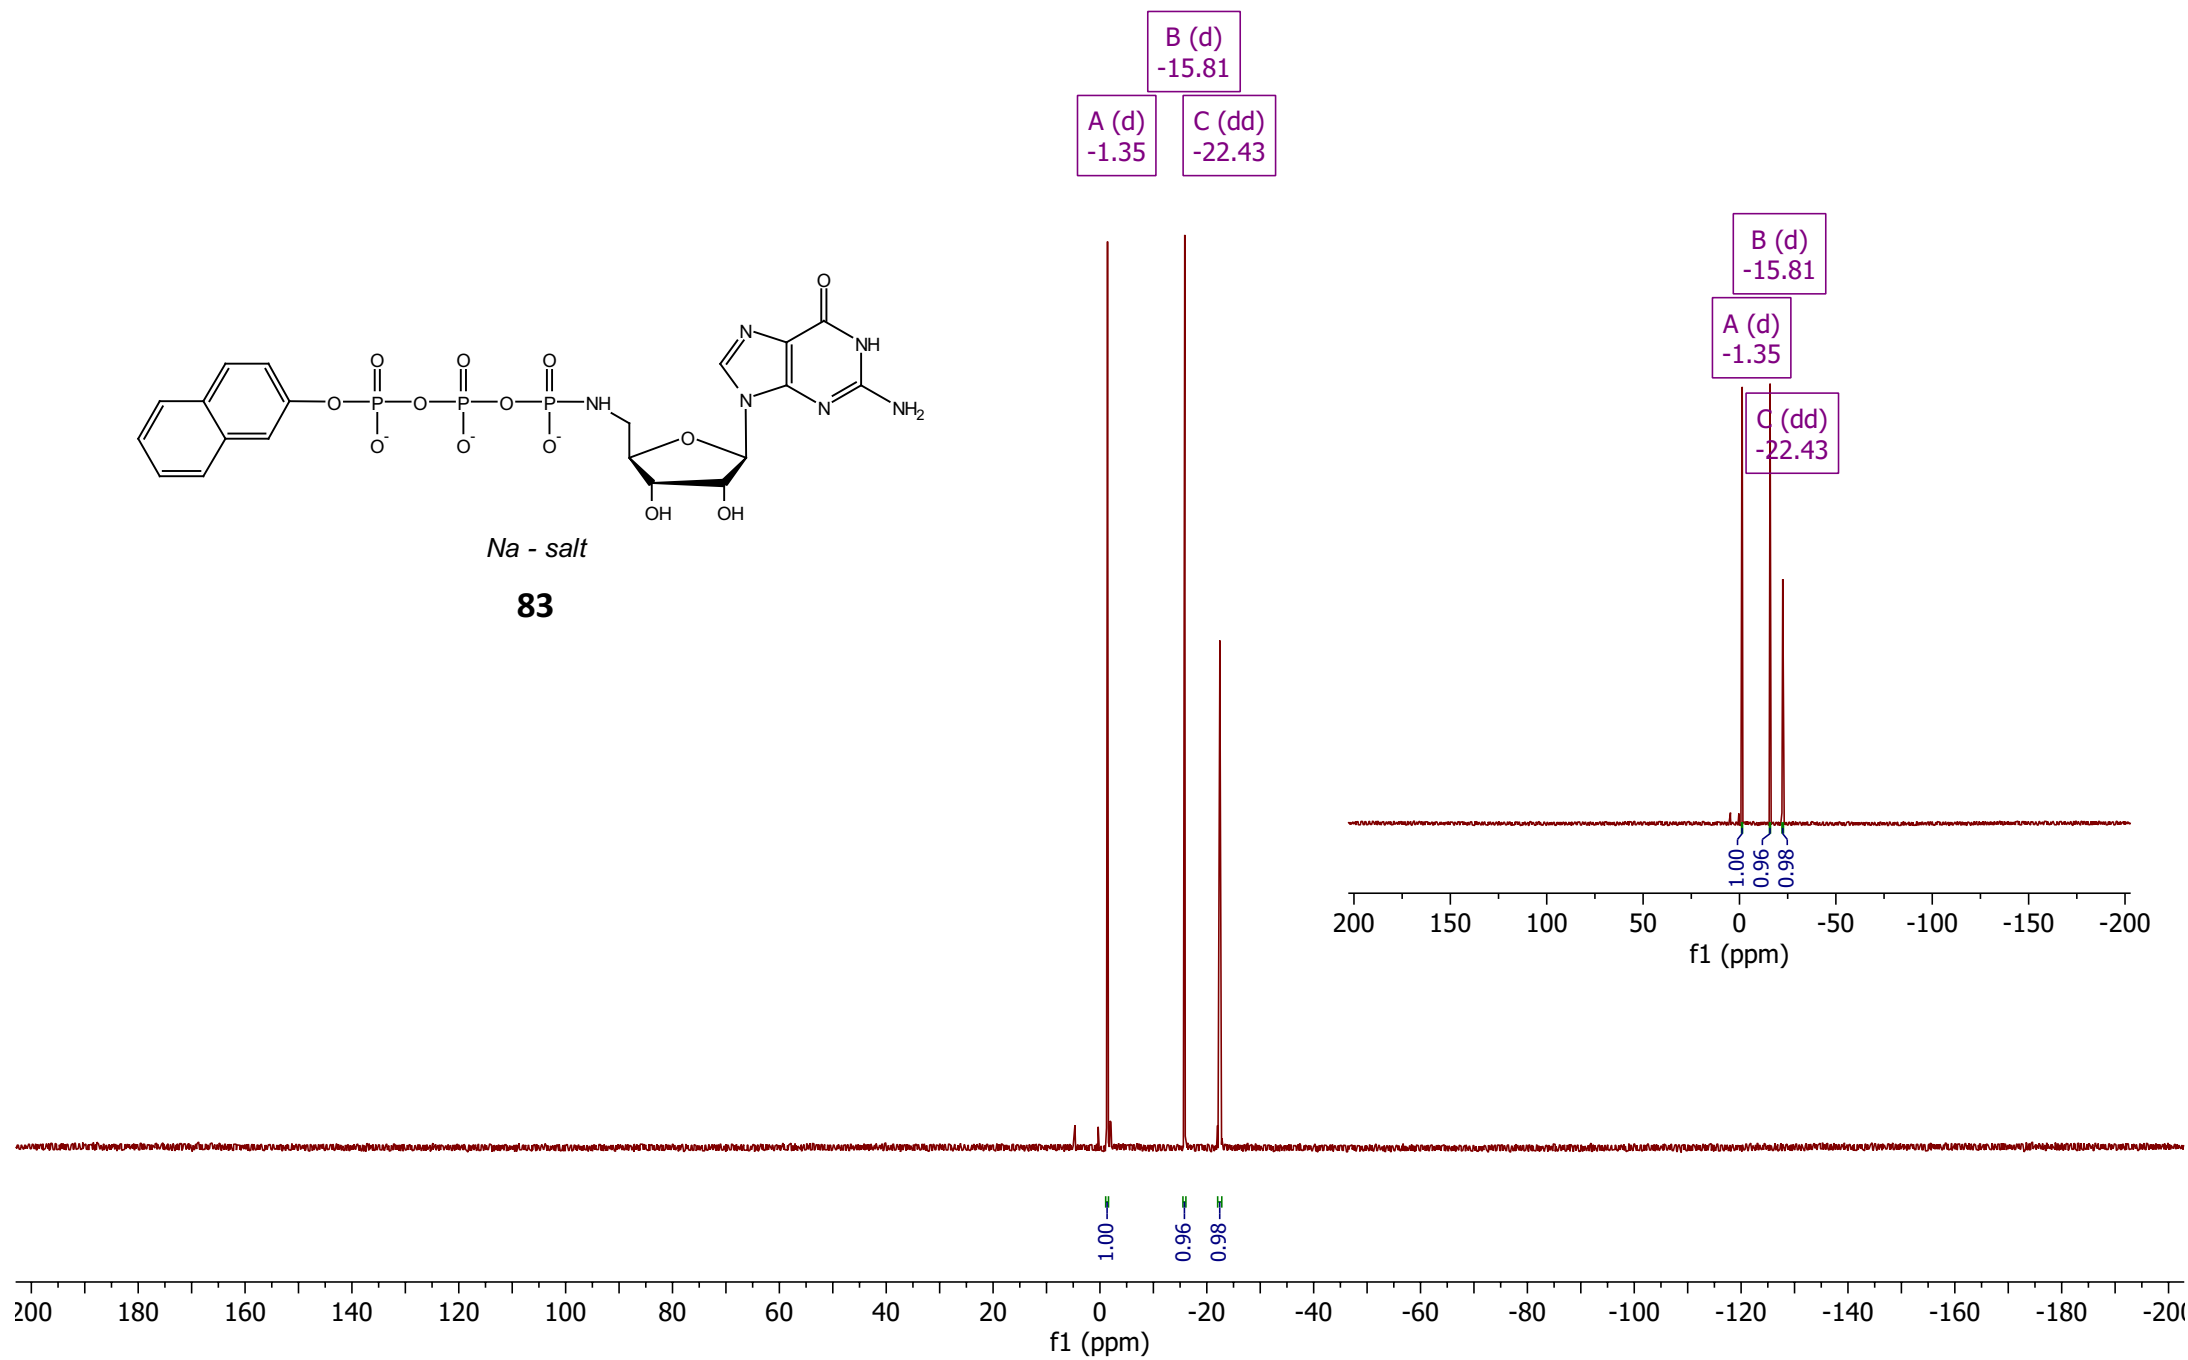

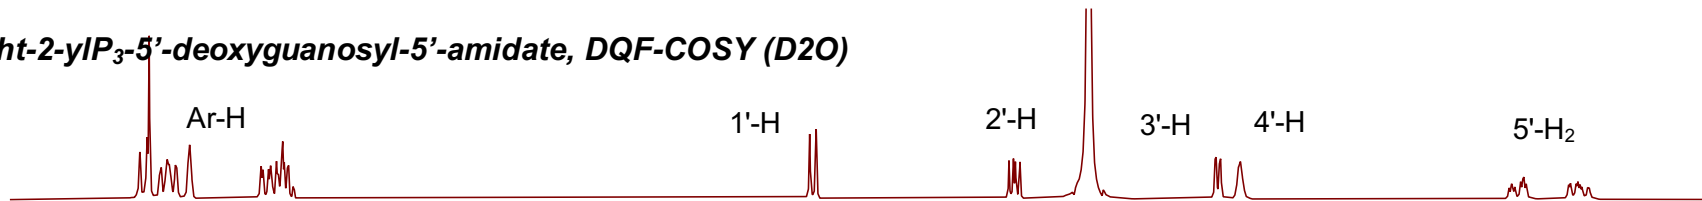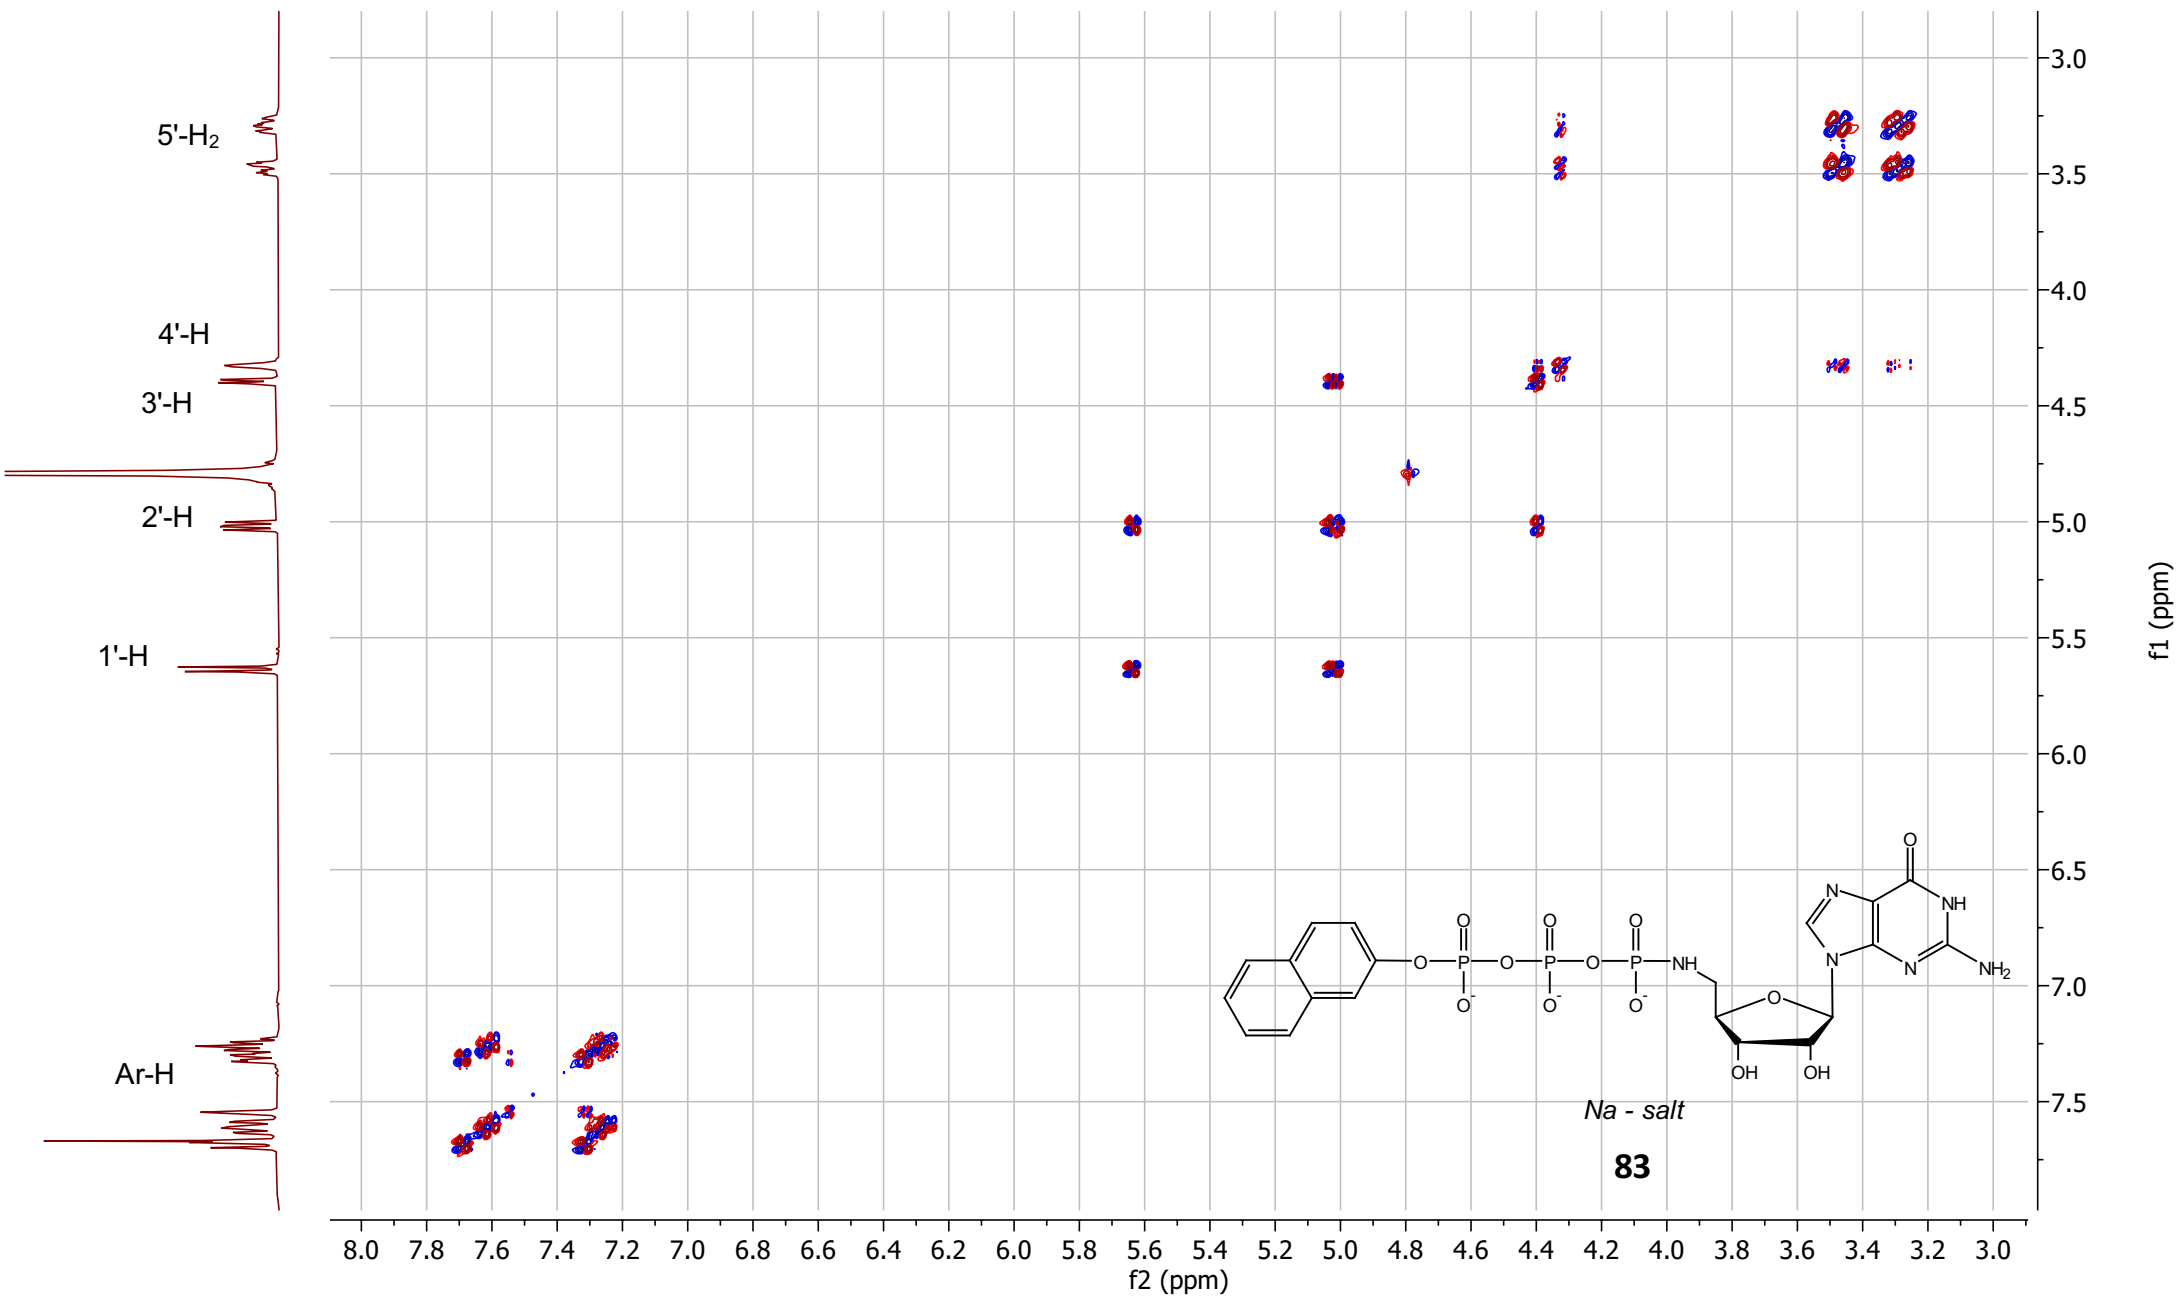

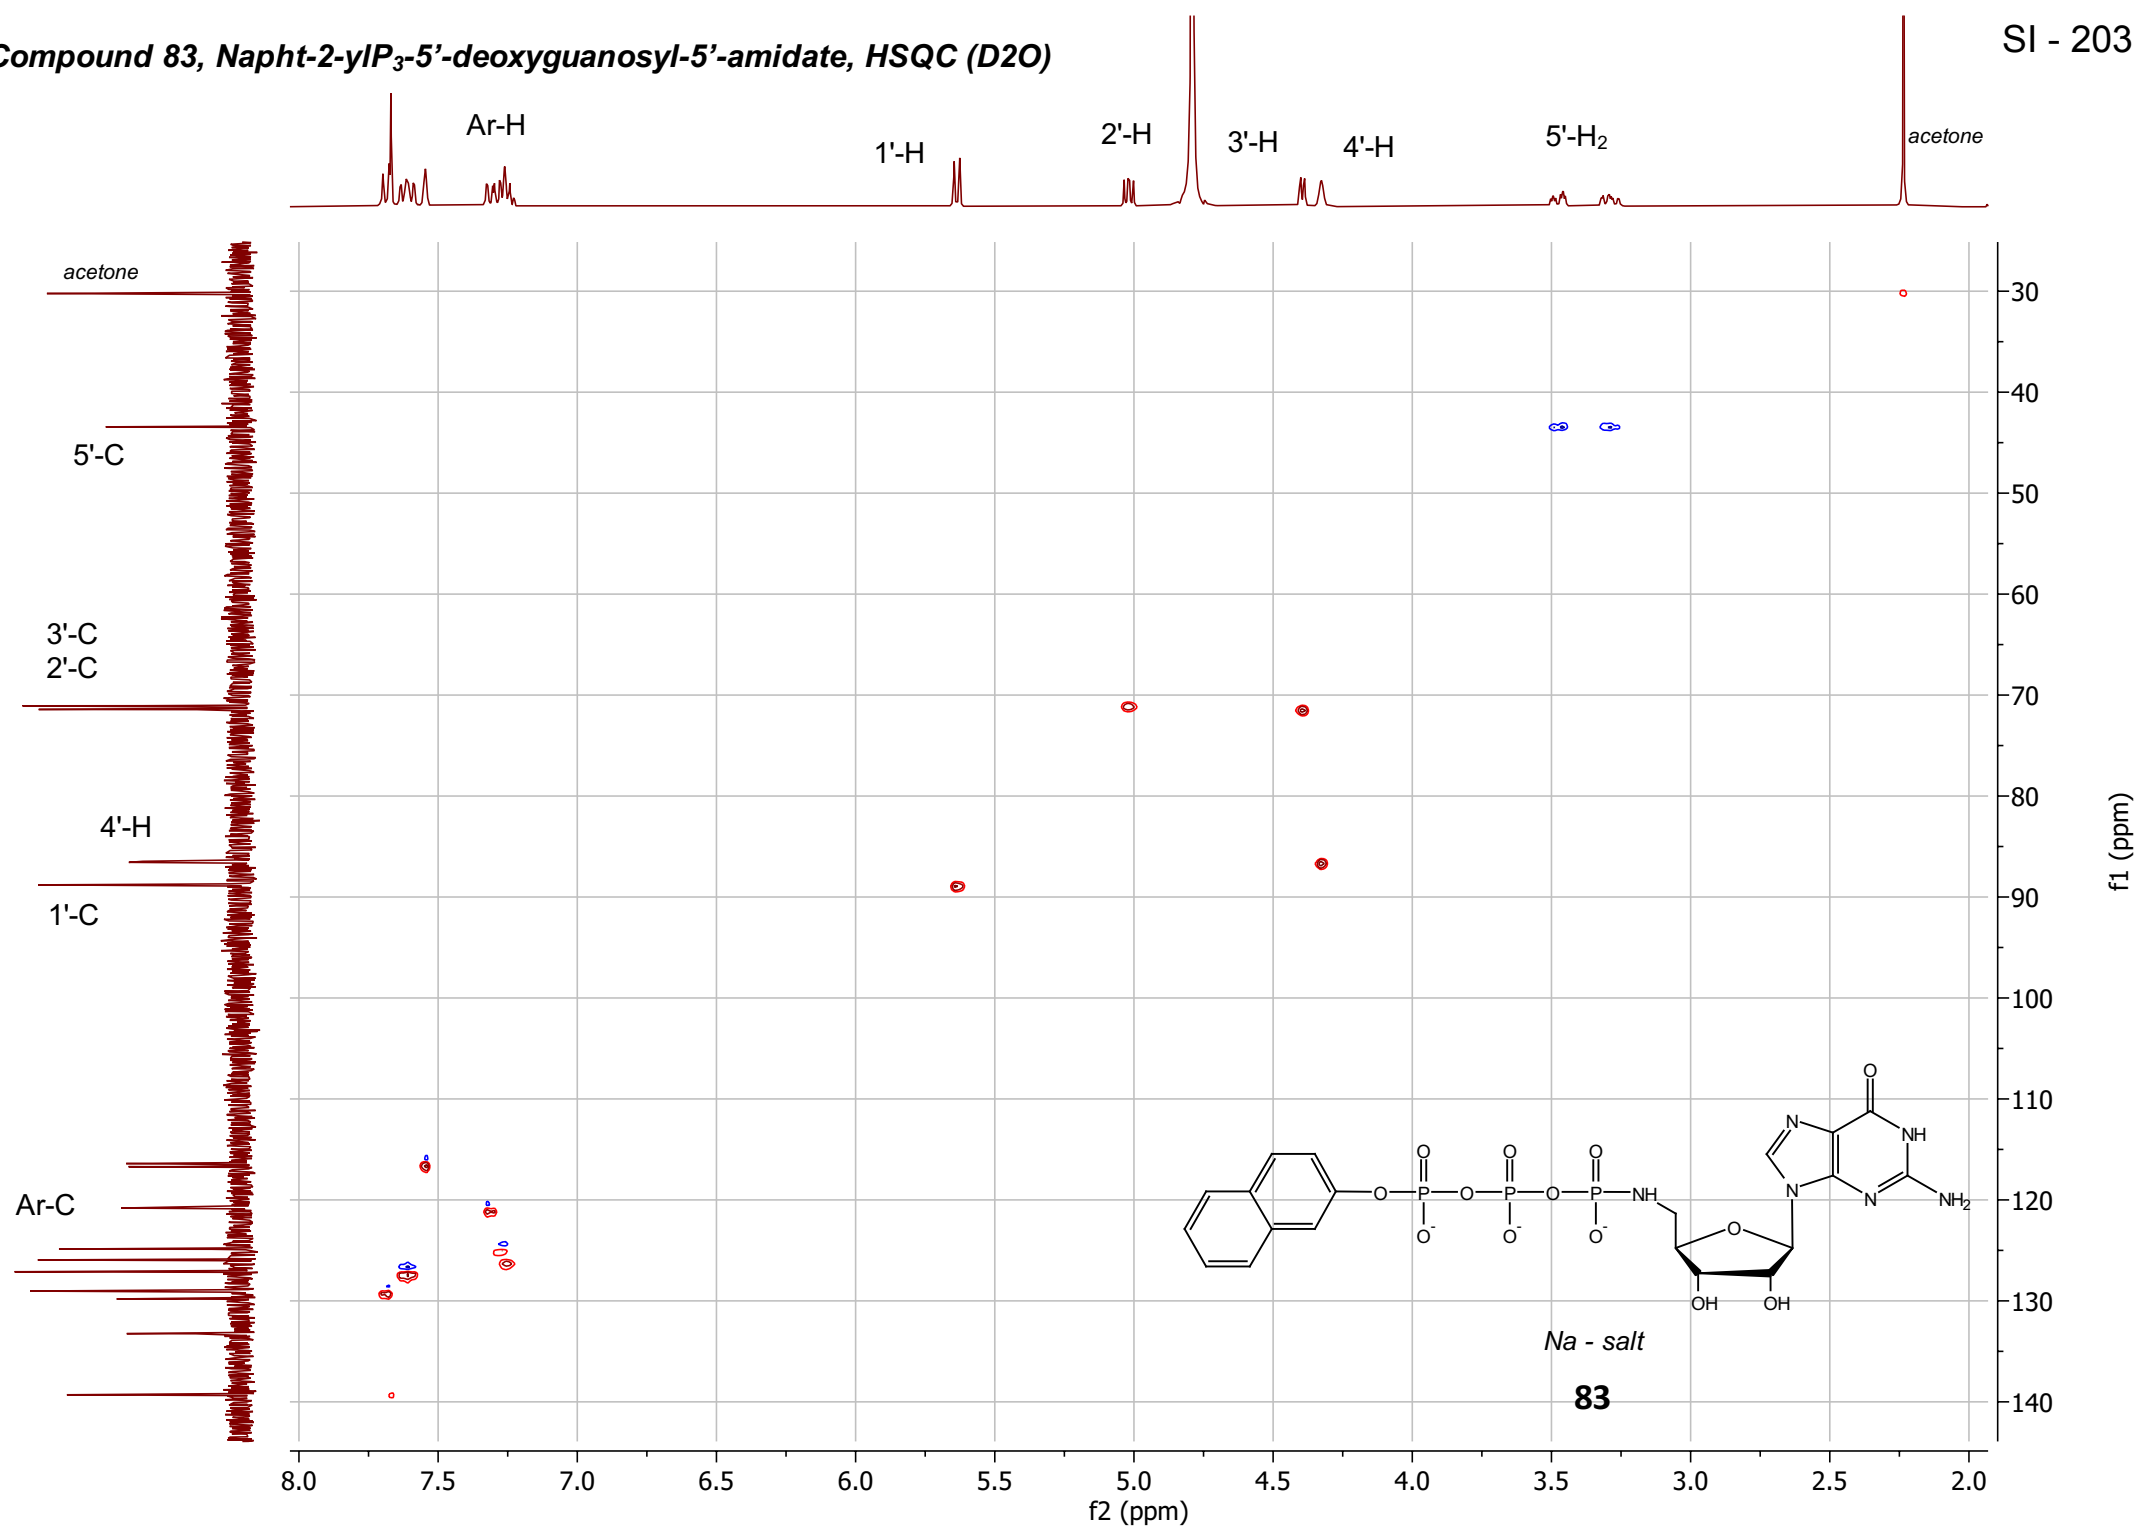

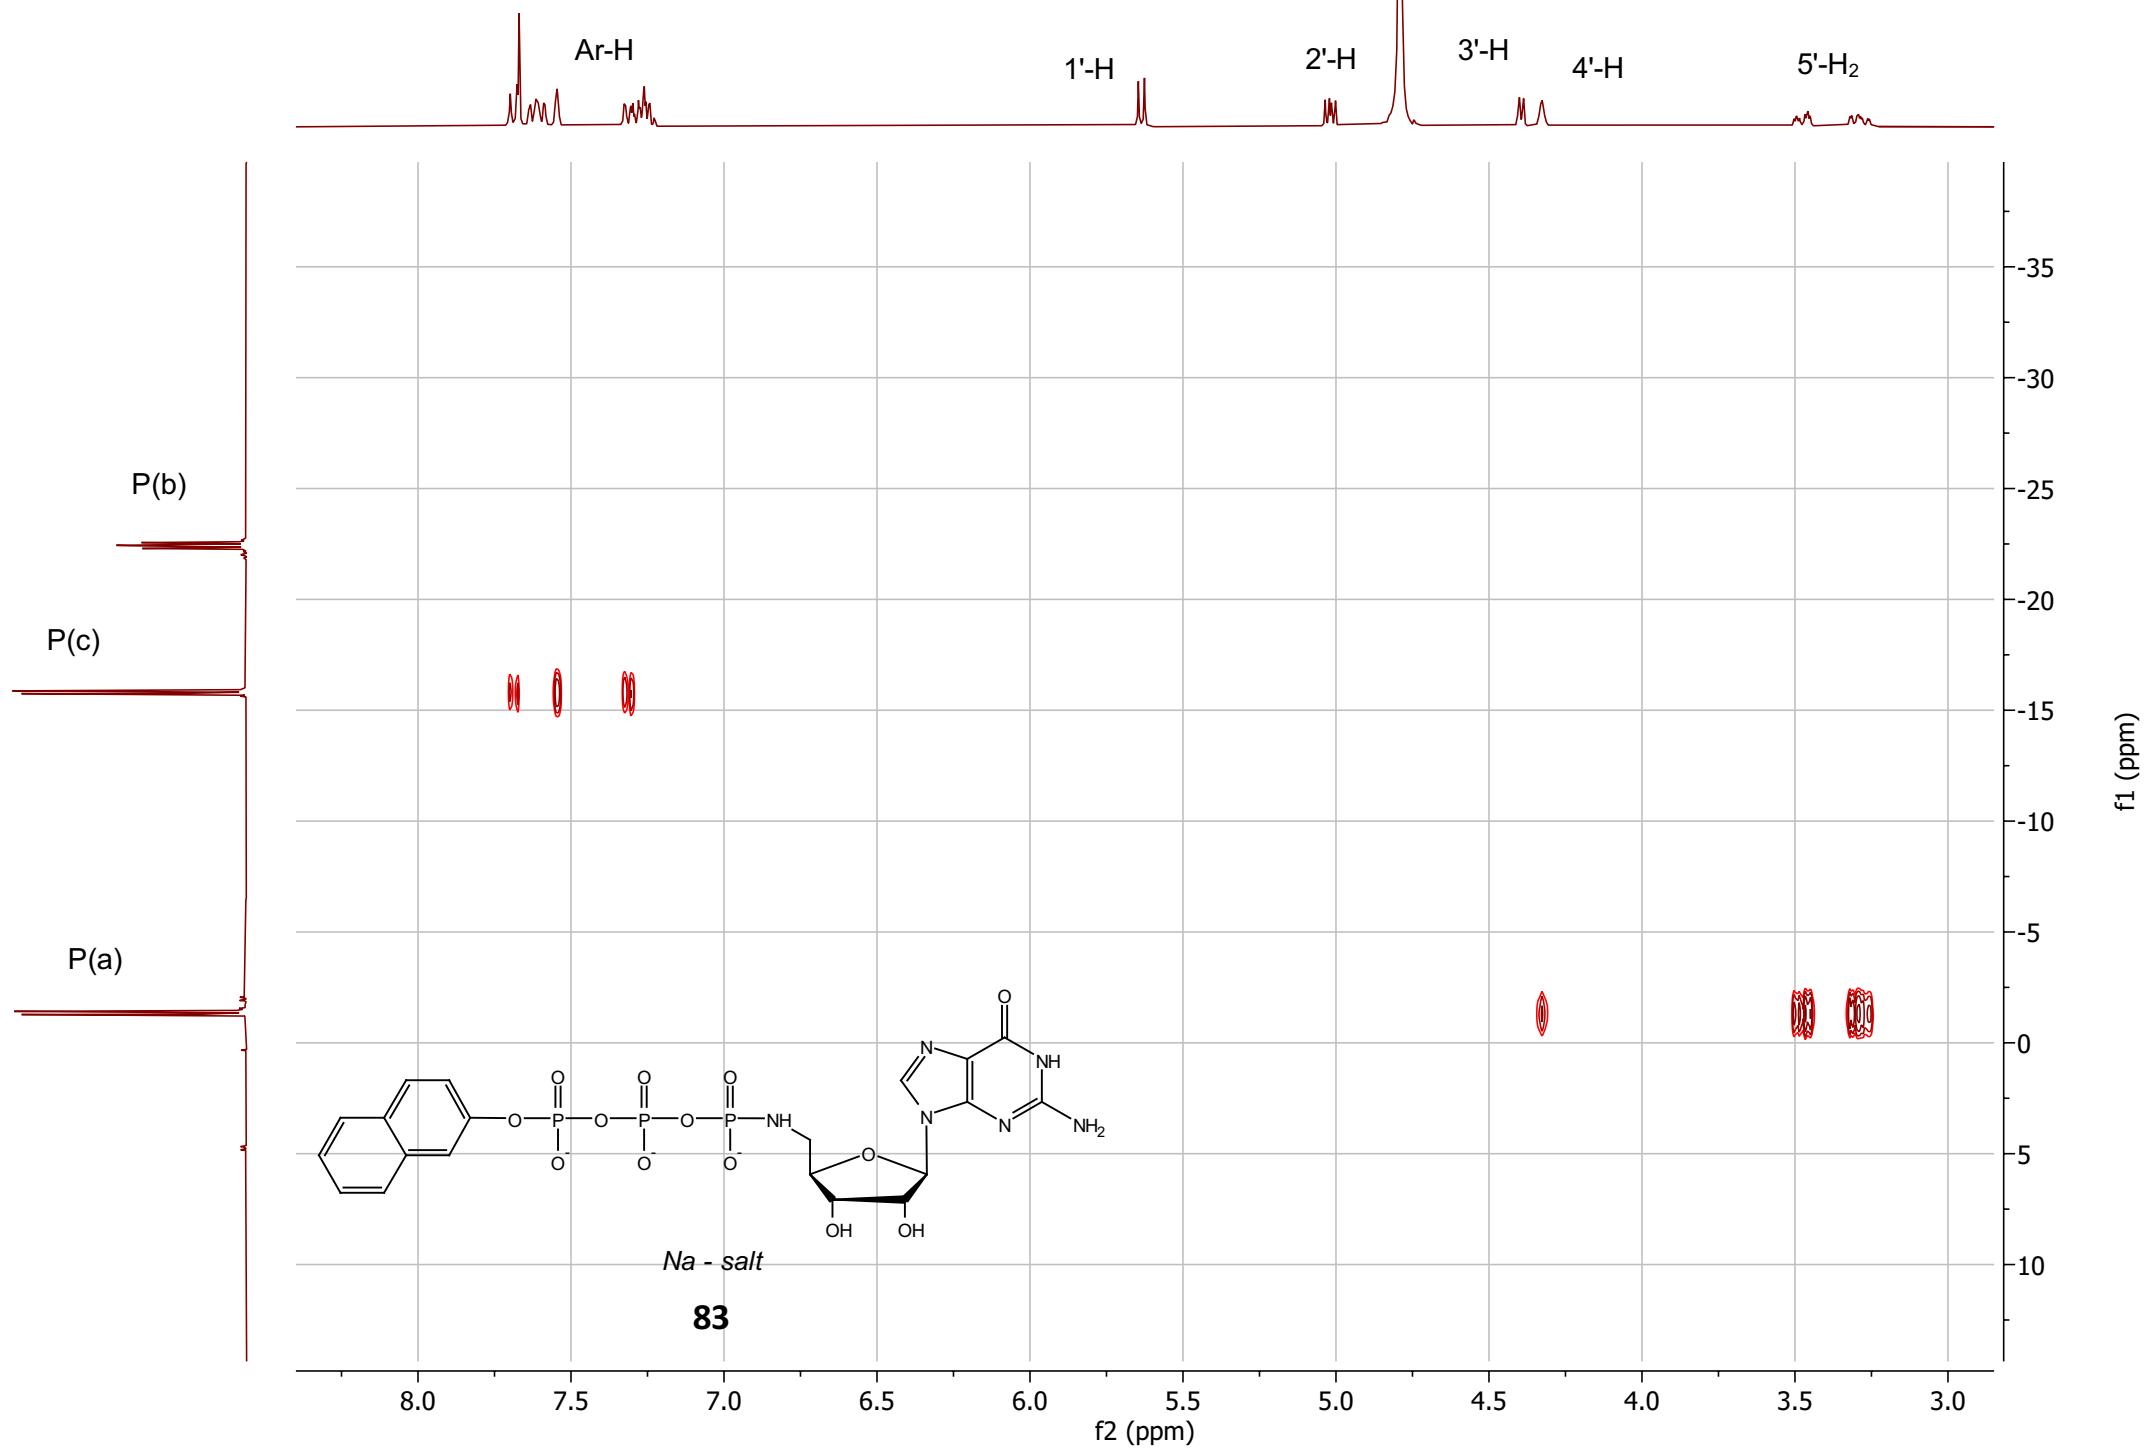

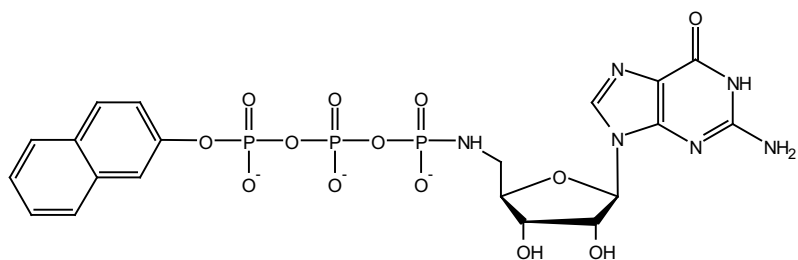

Na - salt

**83**

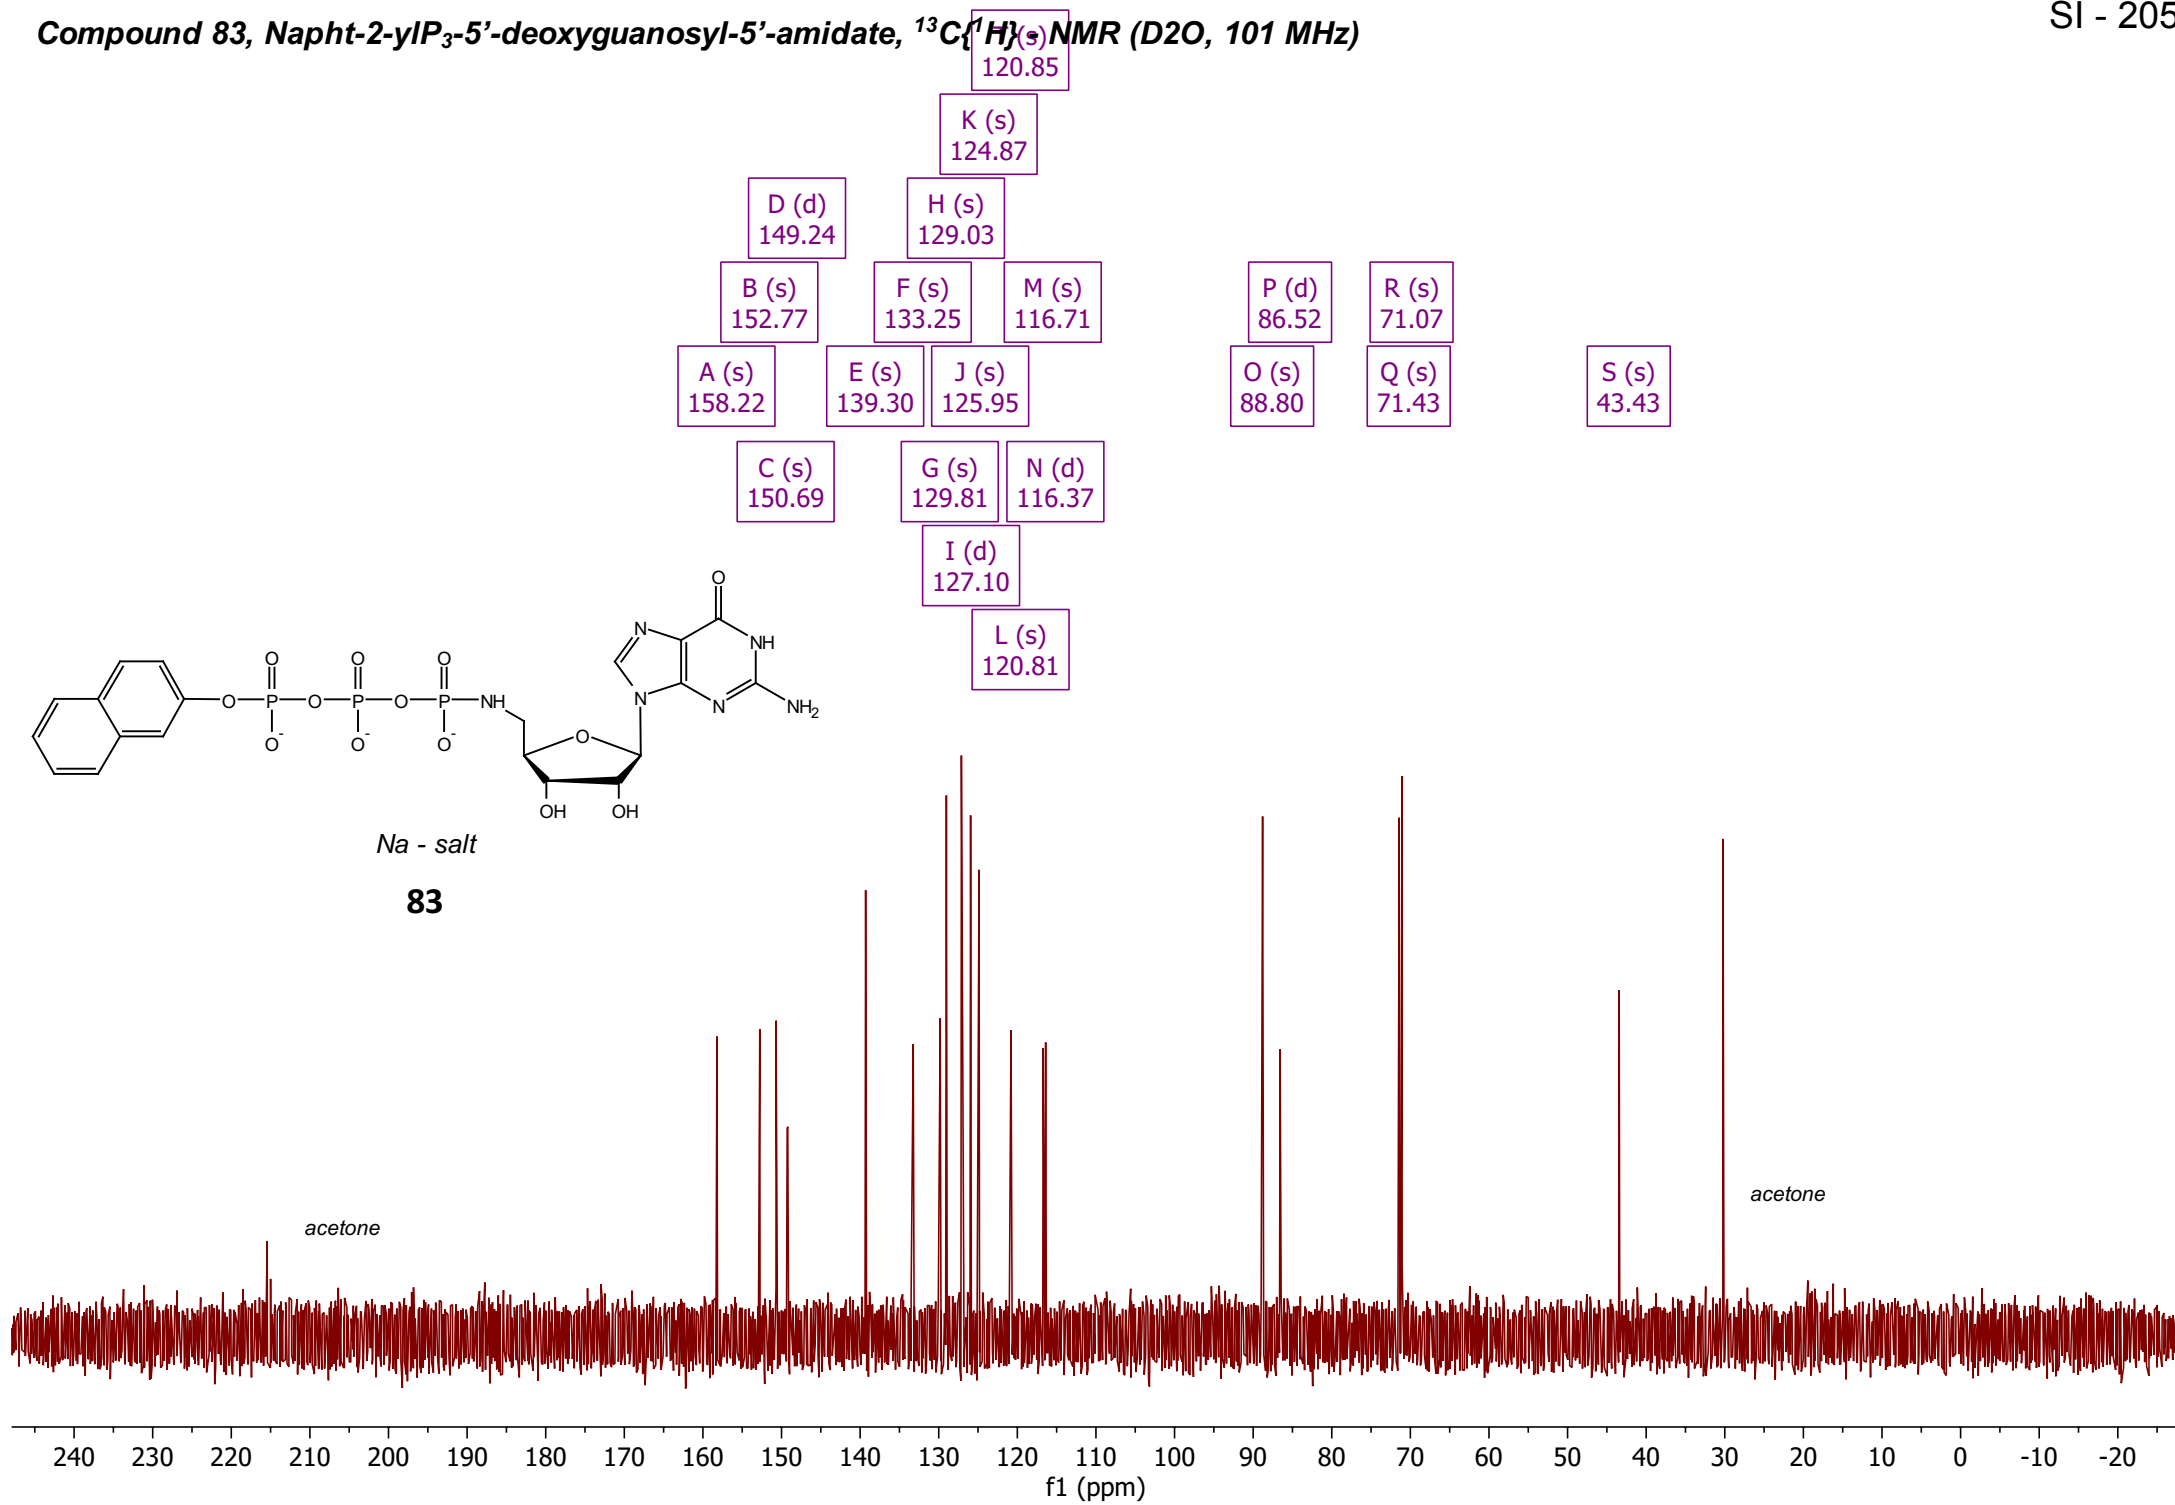



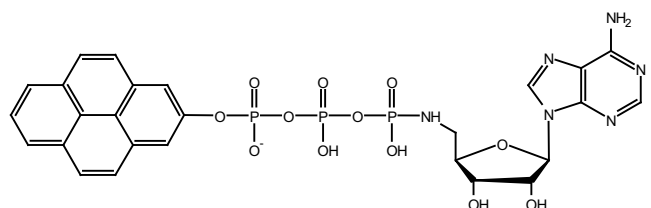

Na - salt

pyren-2-yl-product  
(= main regioisomer)

**84**

H (d)  
8.10

F (s)  
7.51

G (m)  
7.94

E (s)  
7.42

A (d)  
5.33

B (m)  
4.11

D (ddd)  
3.23

C (ddd)  
3.32

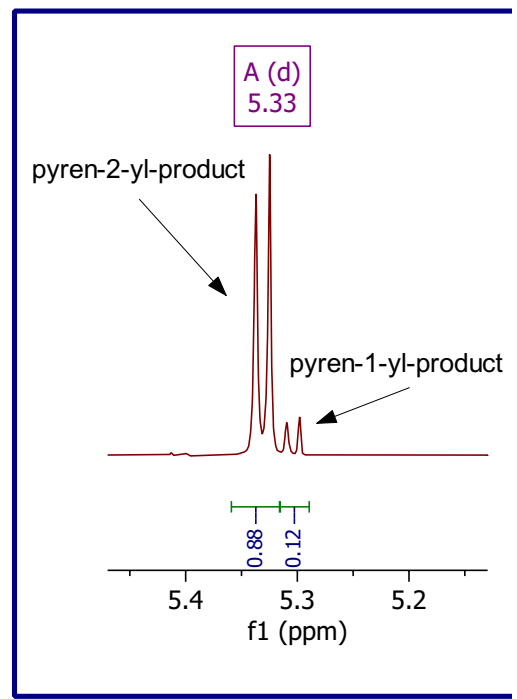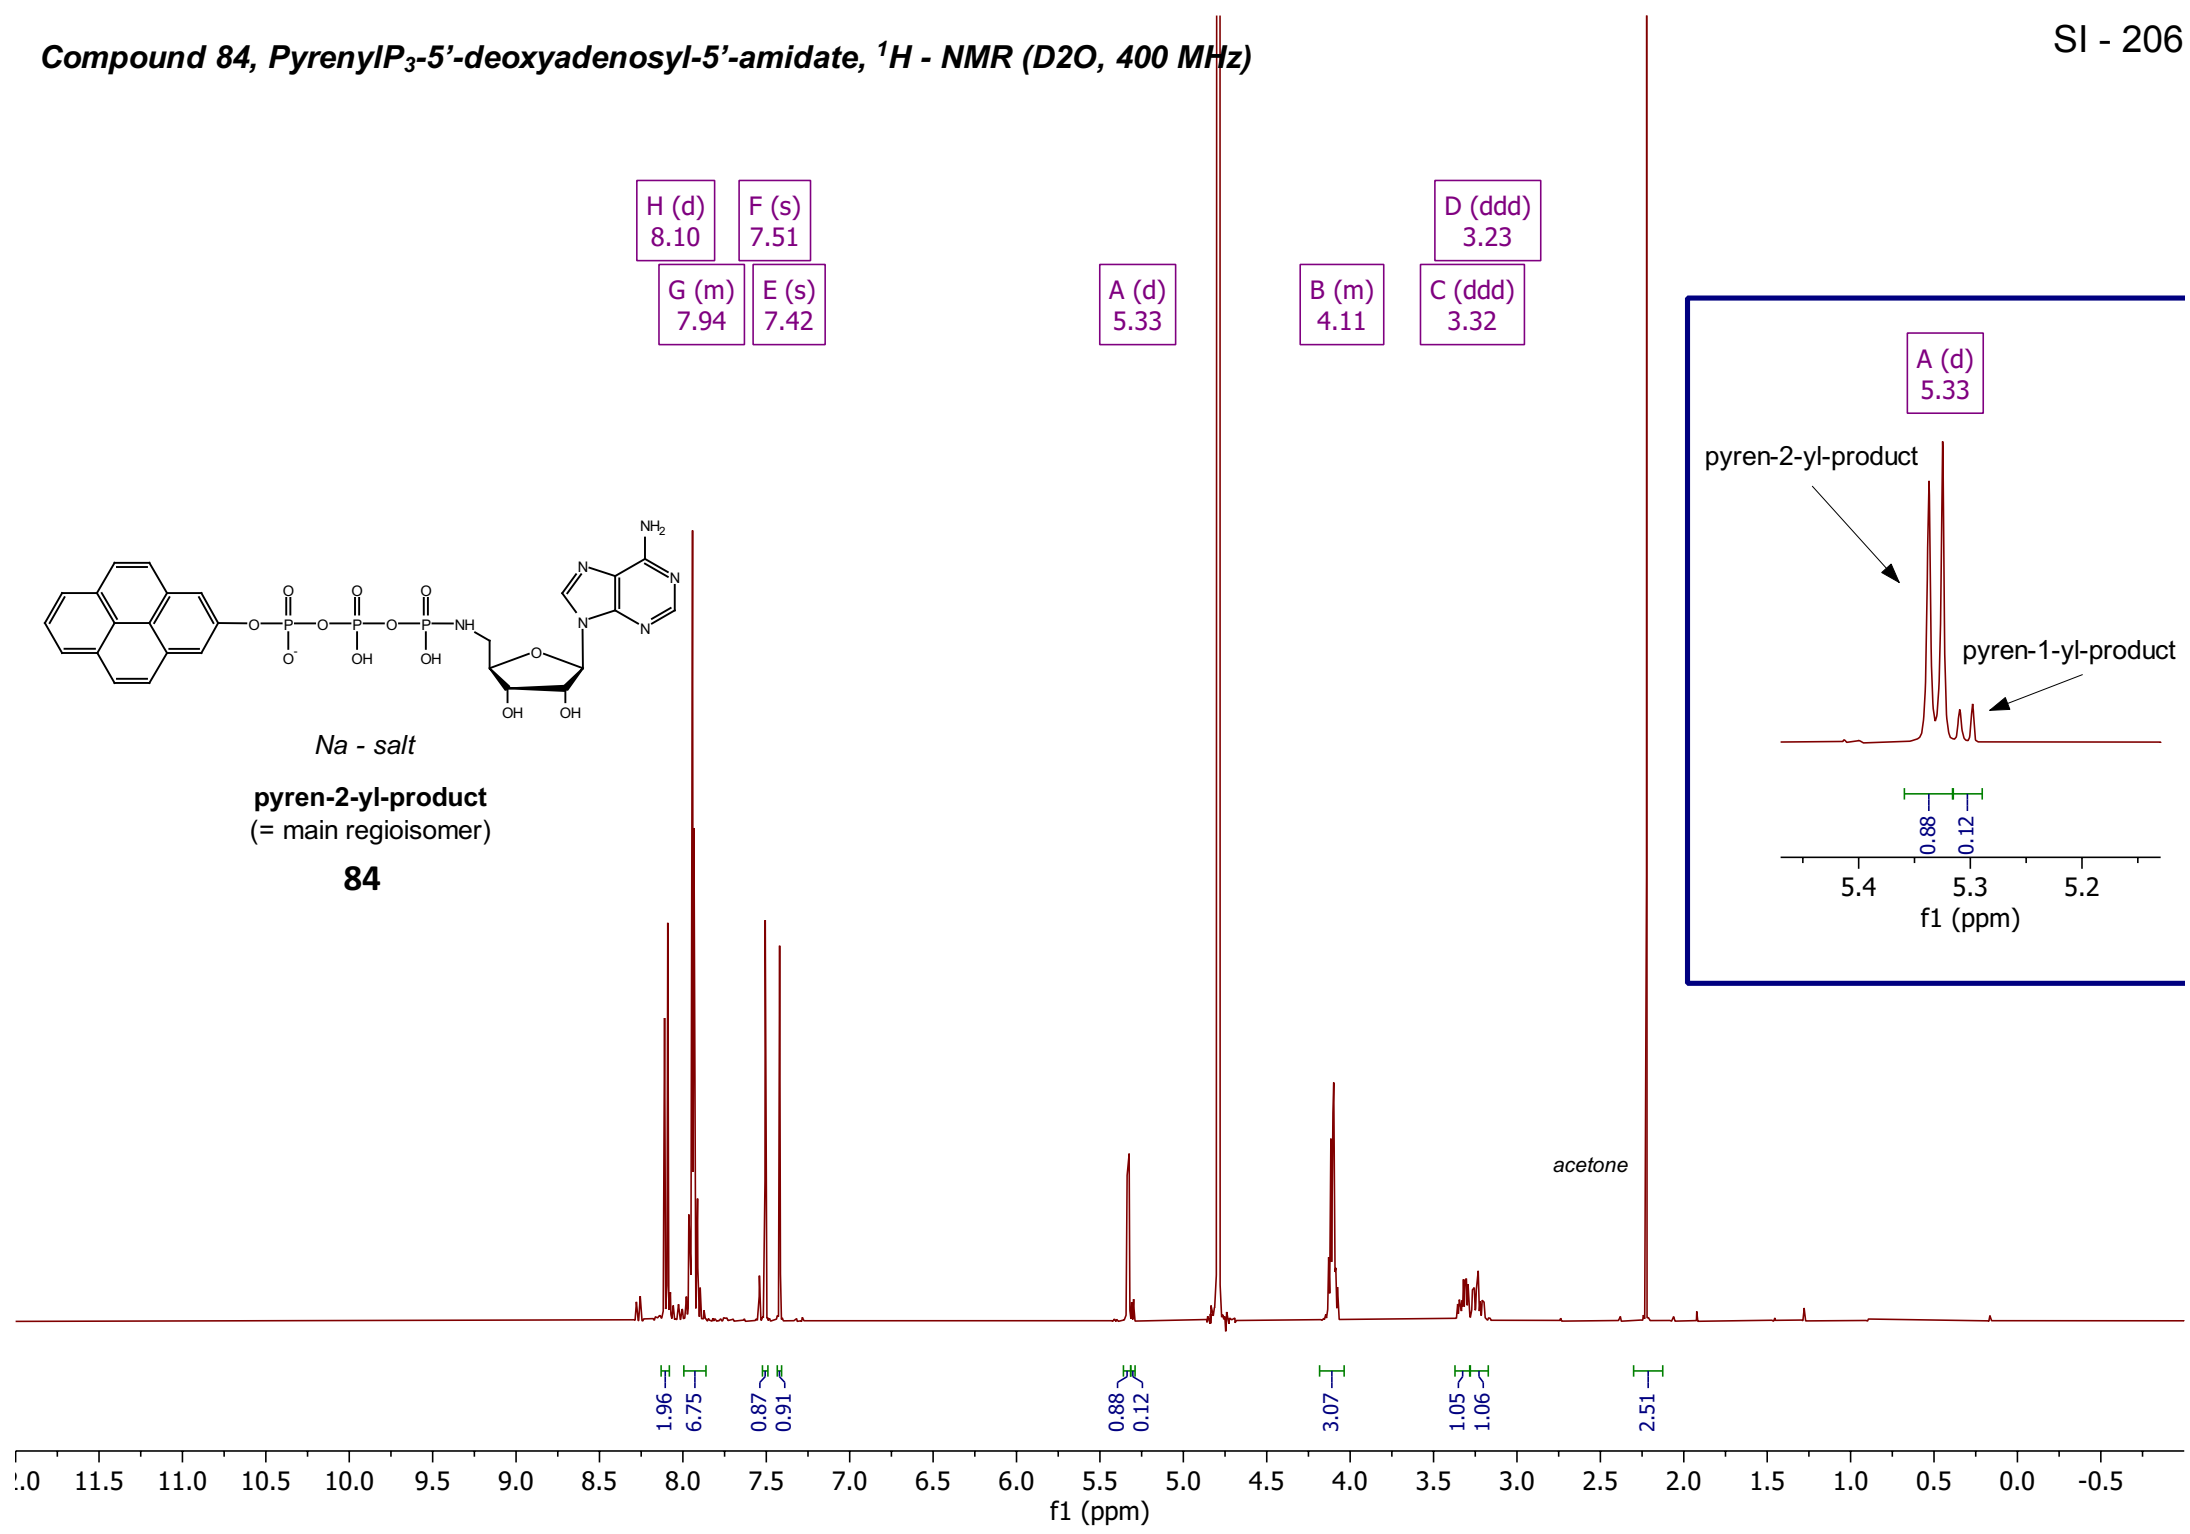

acetone

1.0 11.5 11.0 10.5 10.0 9.5 9.0 8.5 8.0 7.5 7.0 6.5 6.0 5.5 5.0 4.5 4.0 3.5 3.0 2.5 2.0 1.5 1.0 0.5 0.0 -0.5  
f1 (ppm)

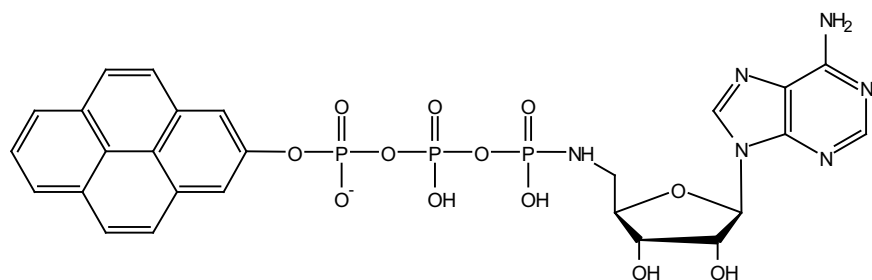

Na - salt  
pyren-2-yl-product  
(= main regioisomer)

**84**

B (d)  
-15.82  
C (d)  
-1.62  
A (dd)  
-22.75

C (d)  
-1.62

B (d)  
-15.82

A (dd)  
-22.75

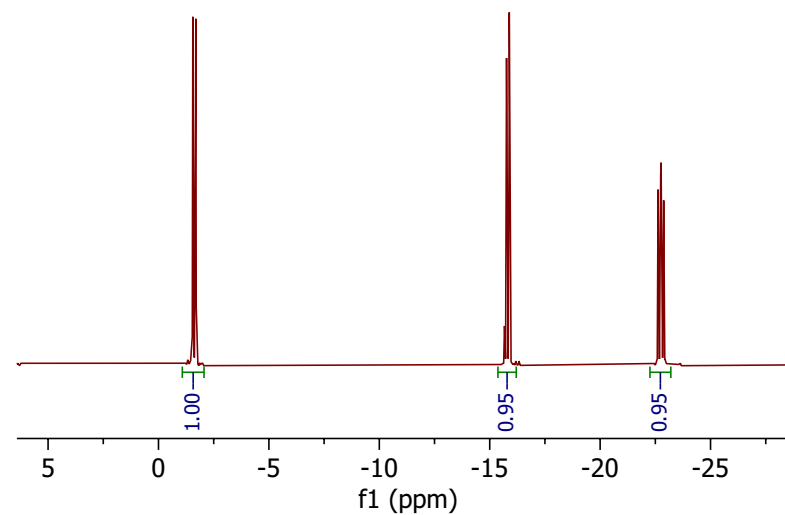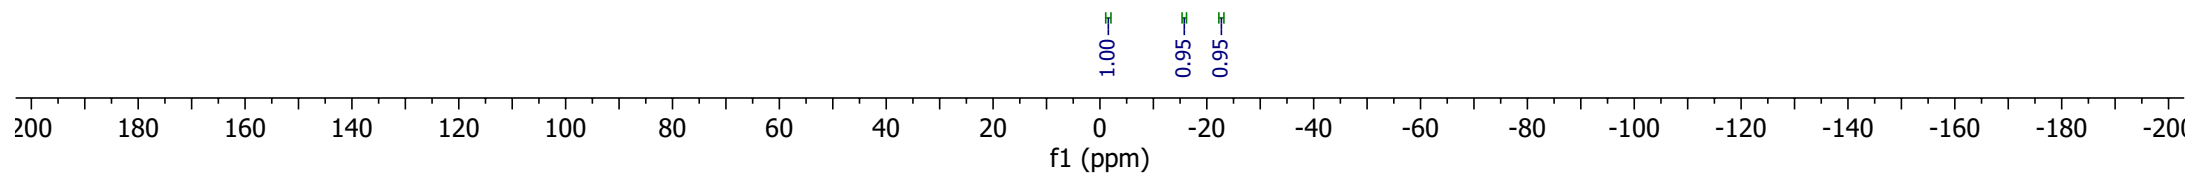

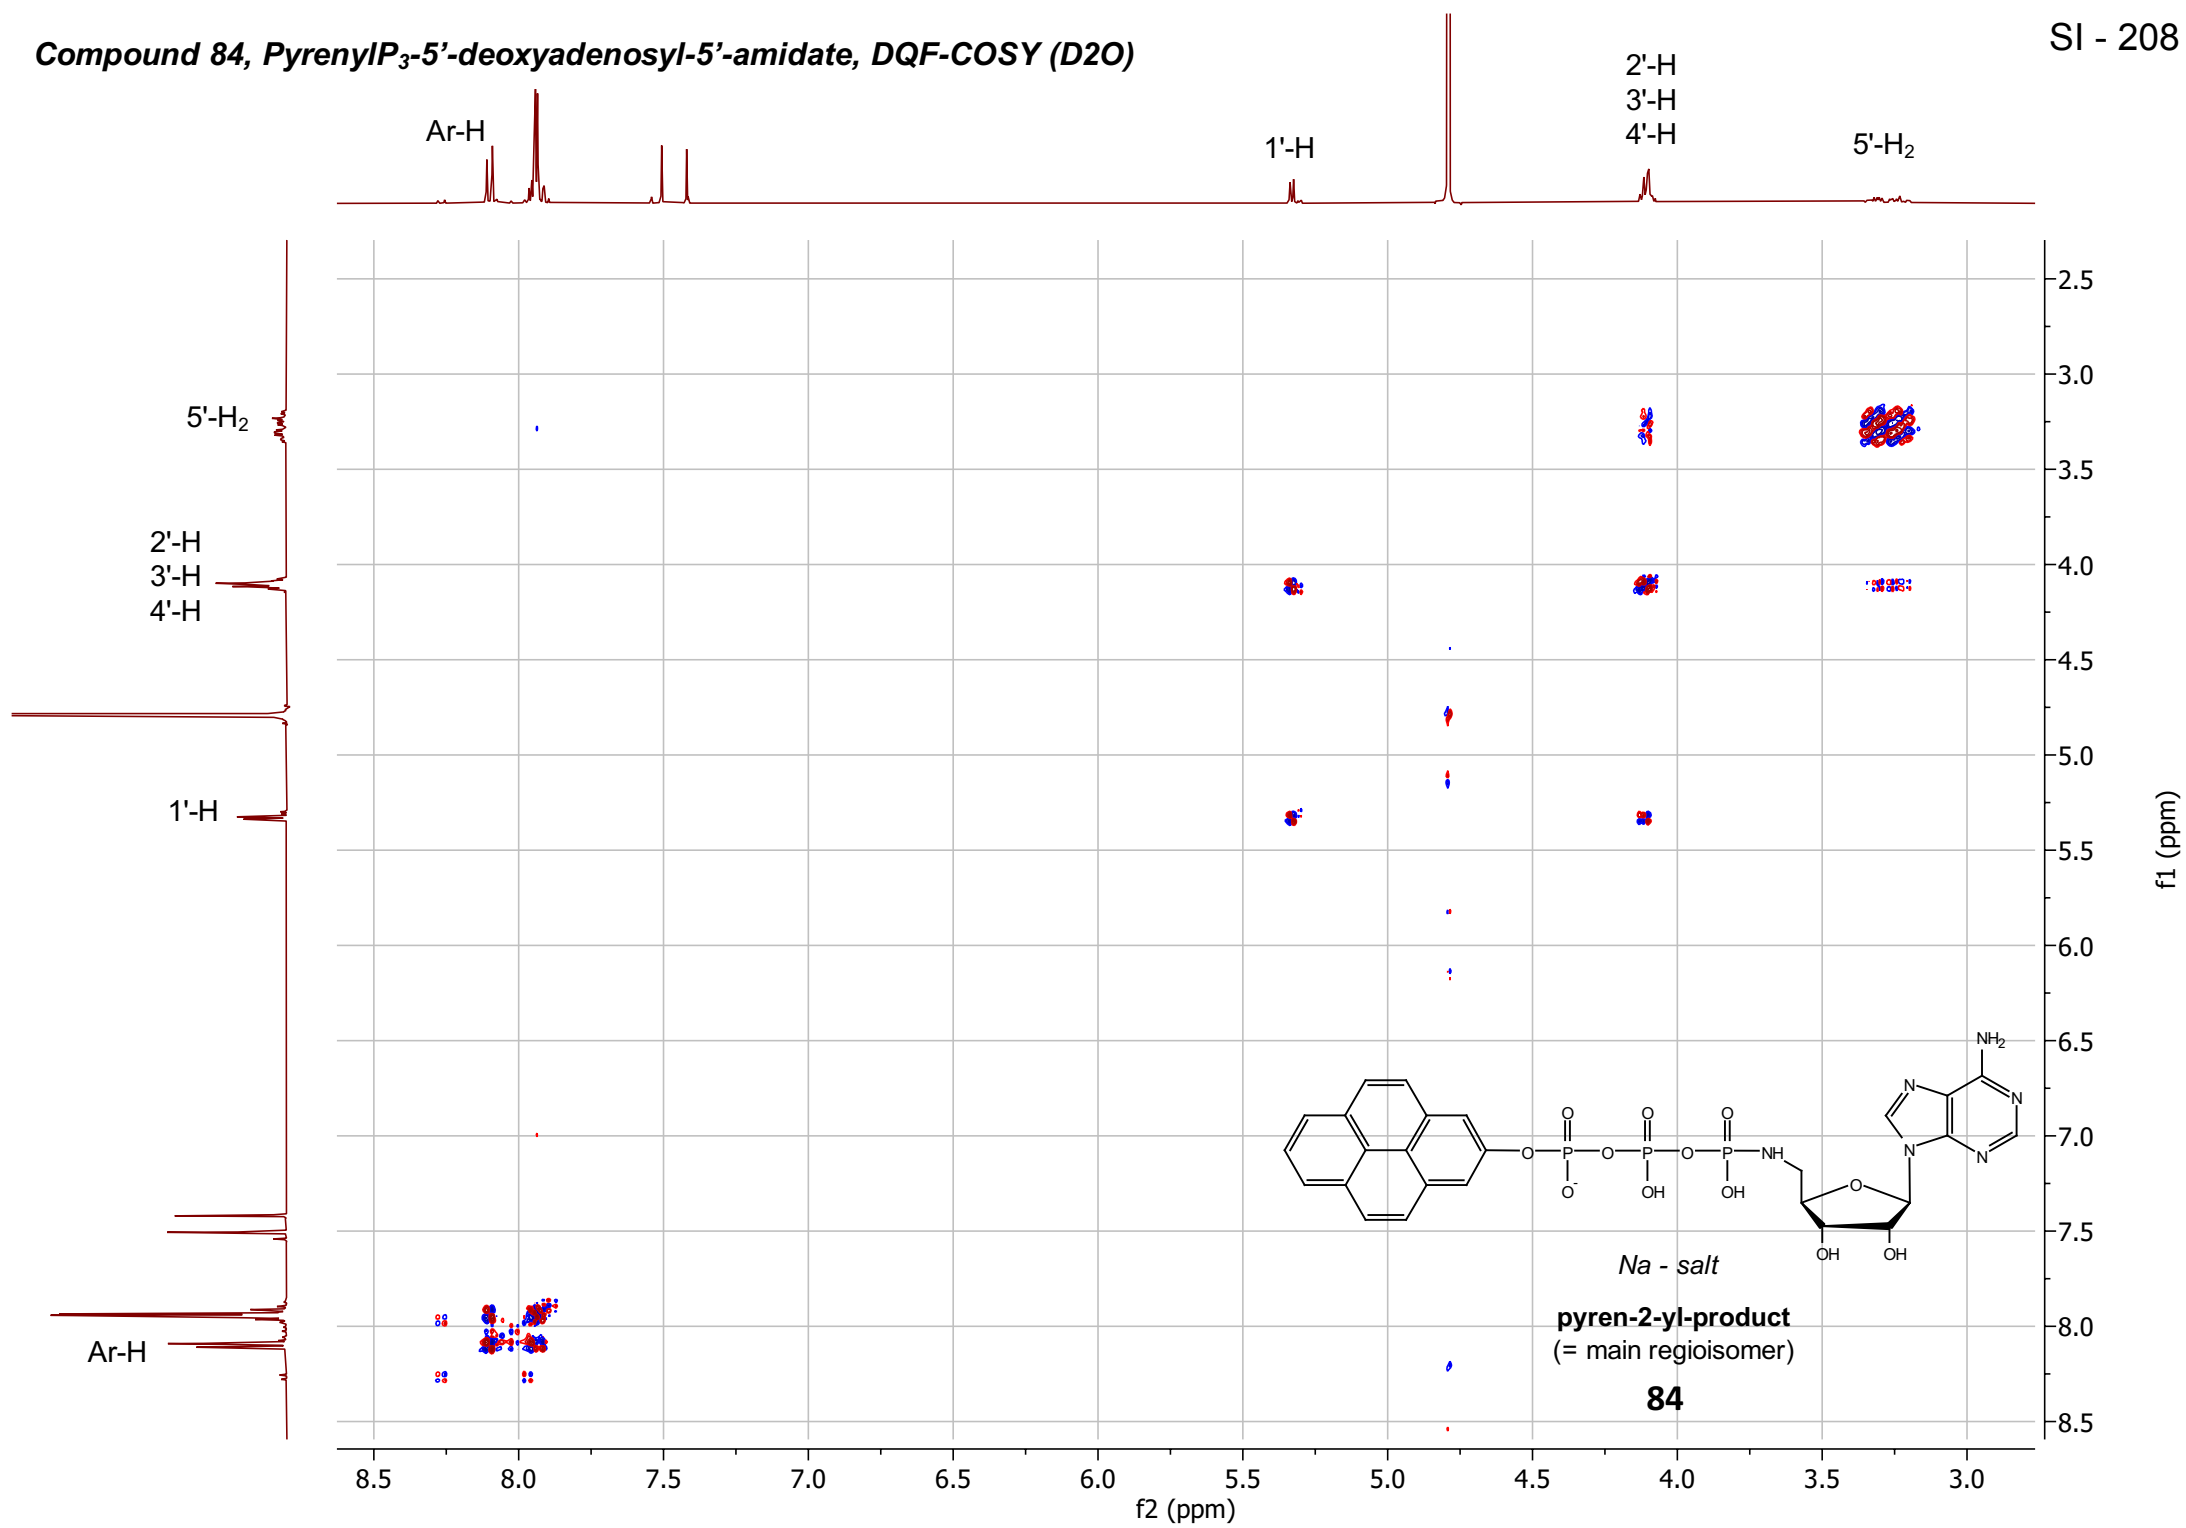

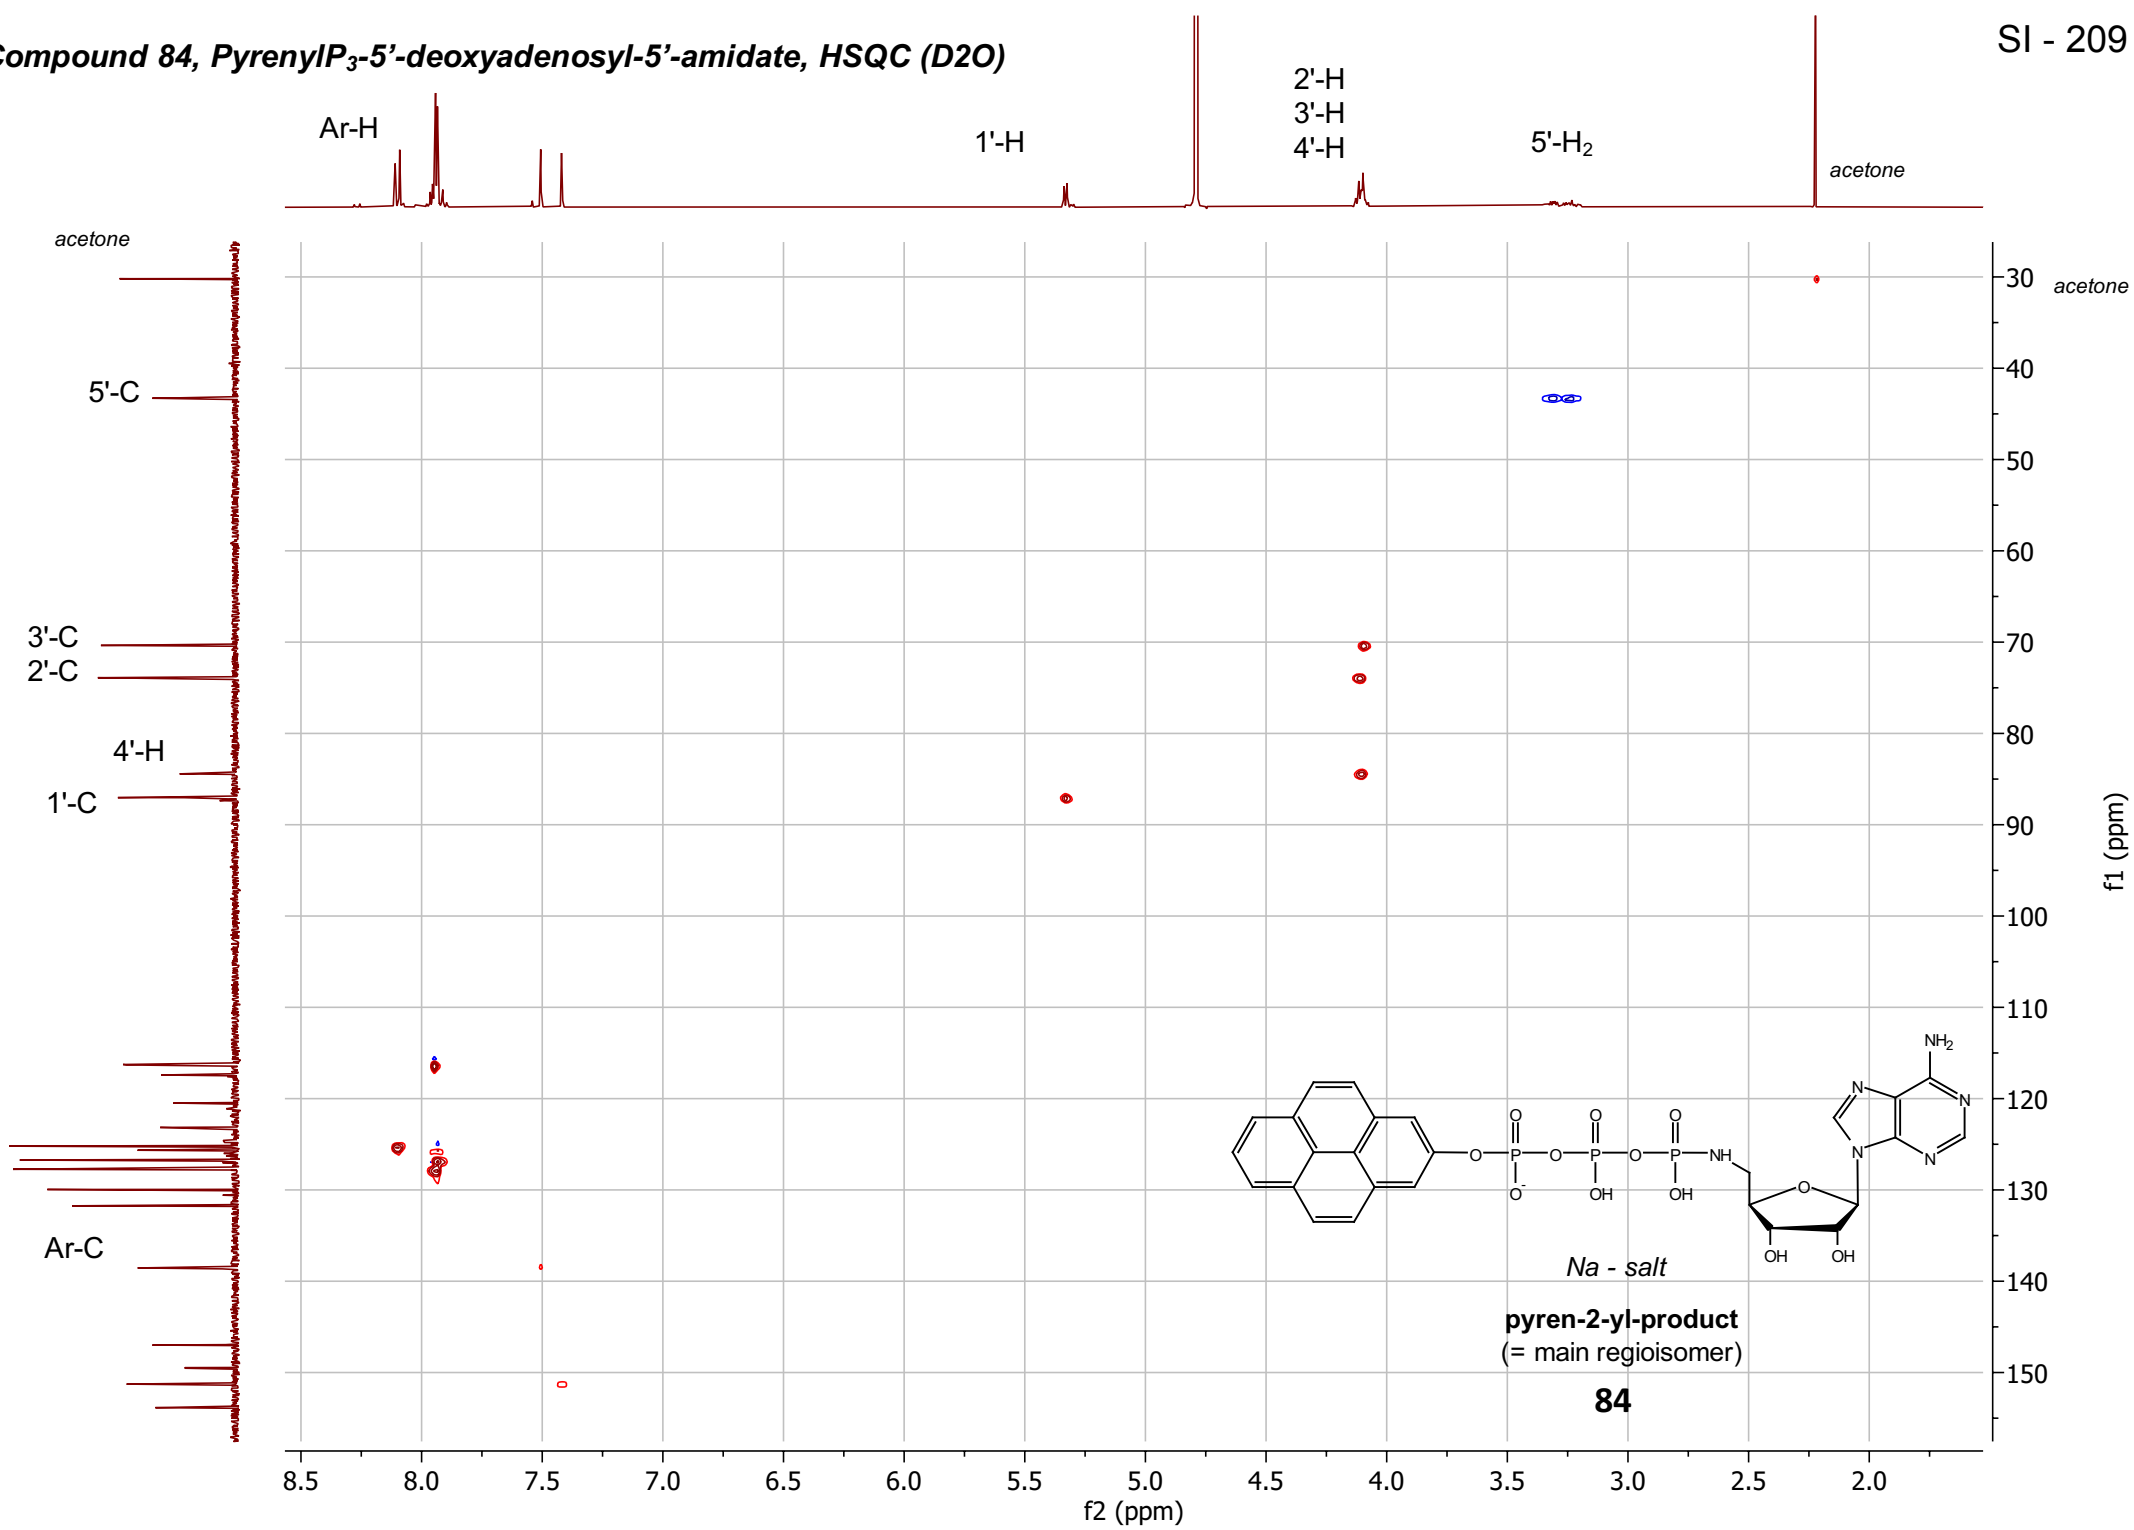

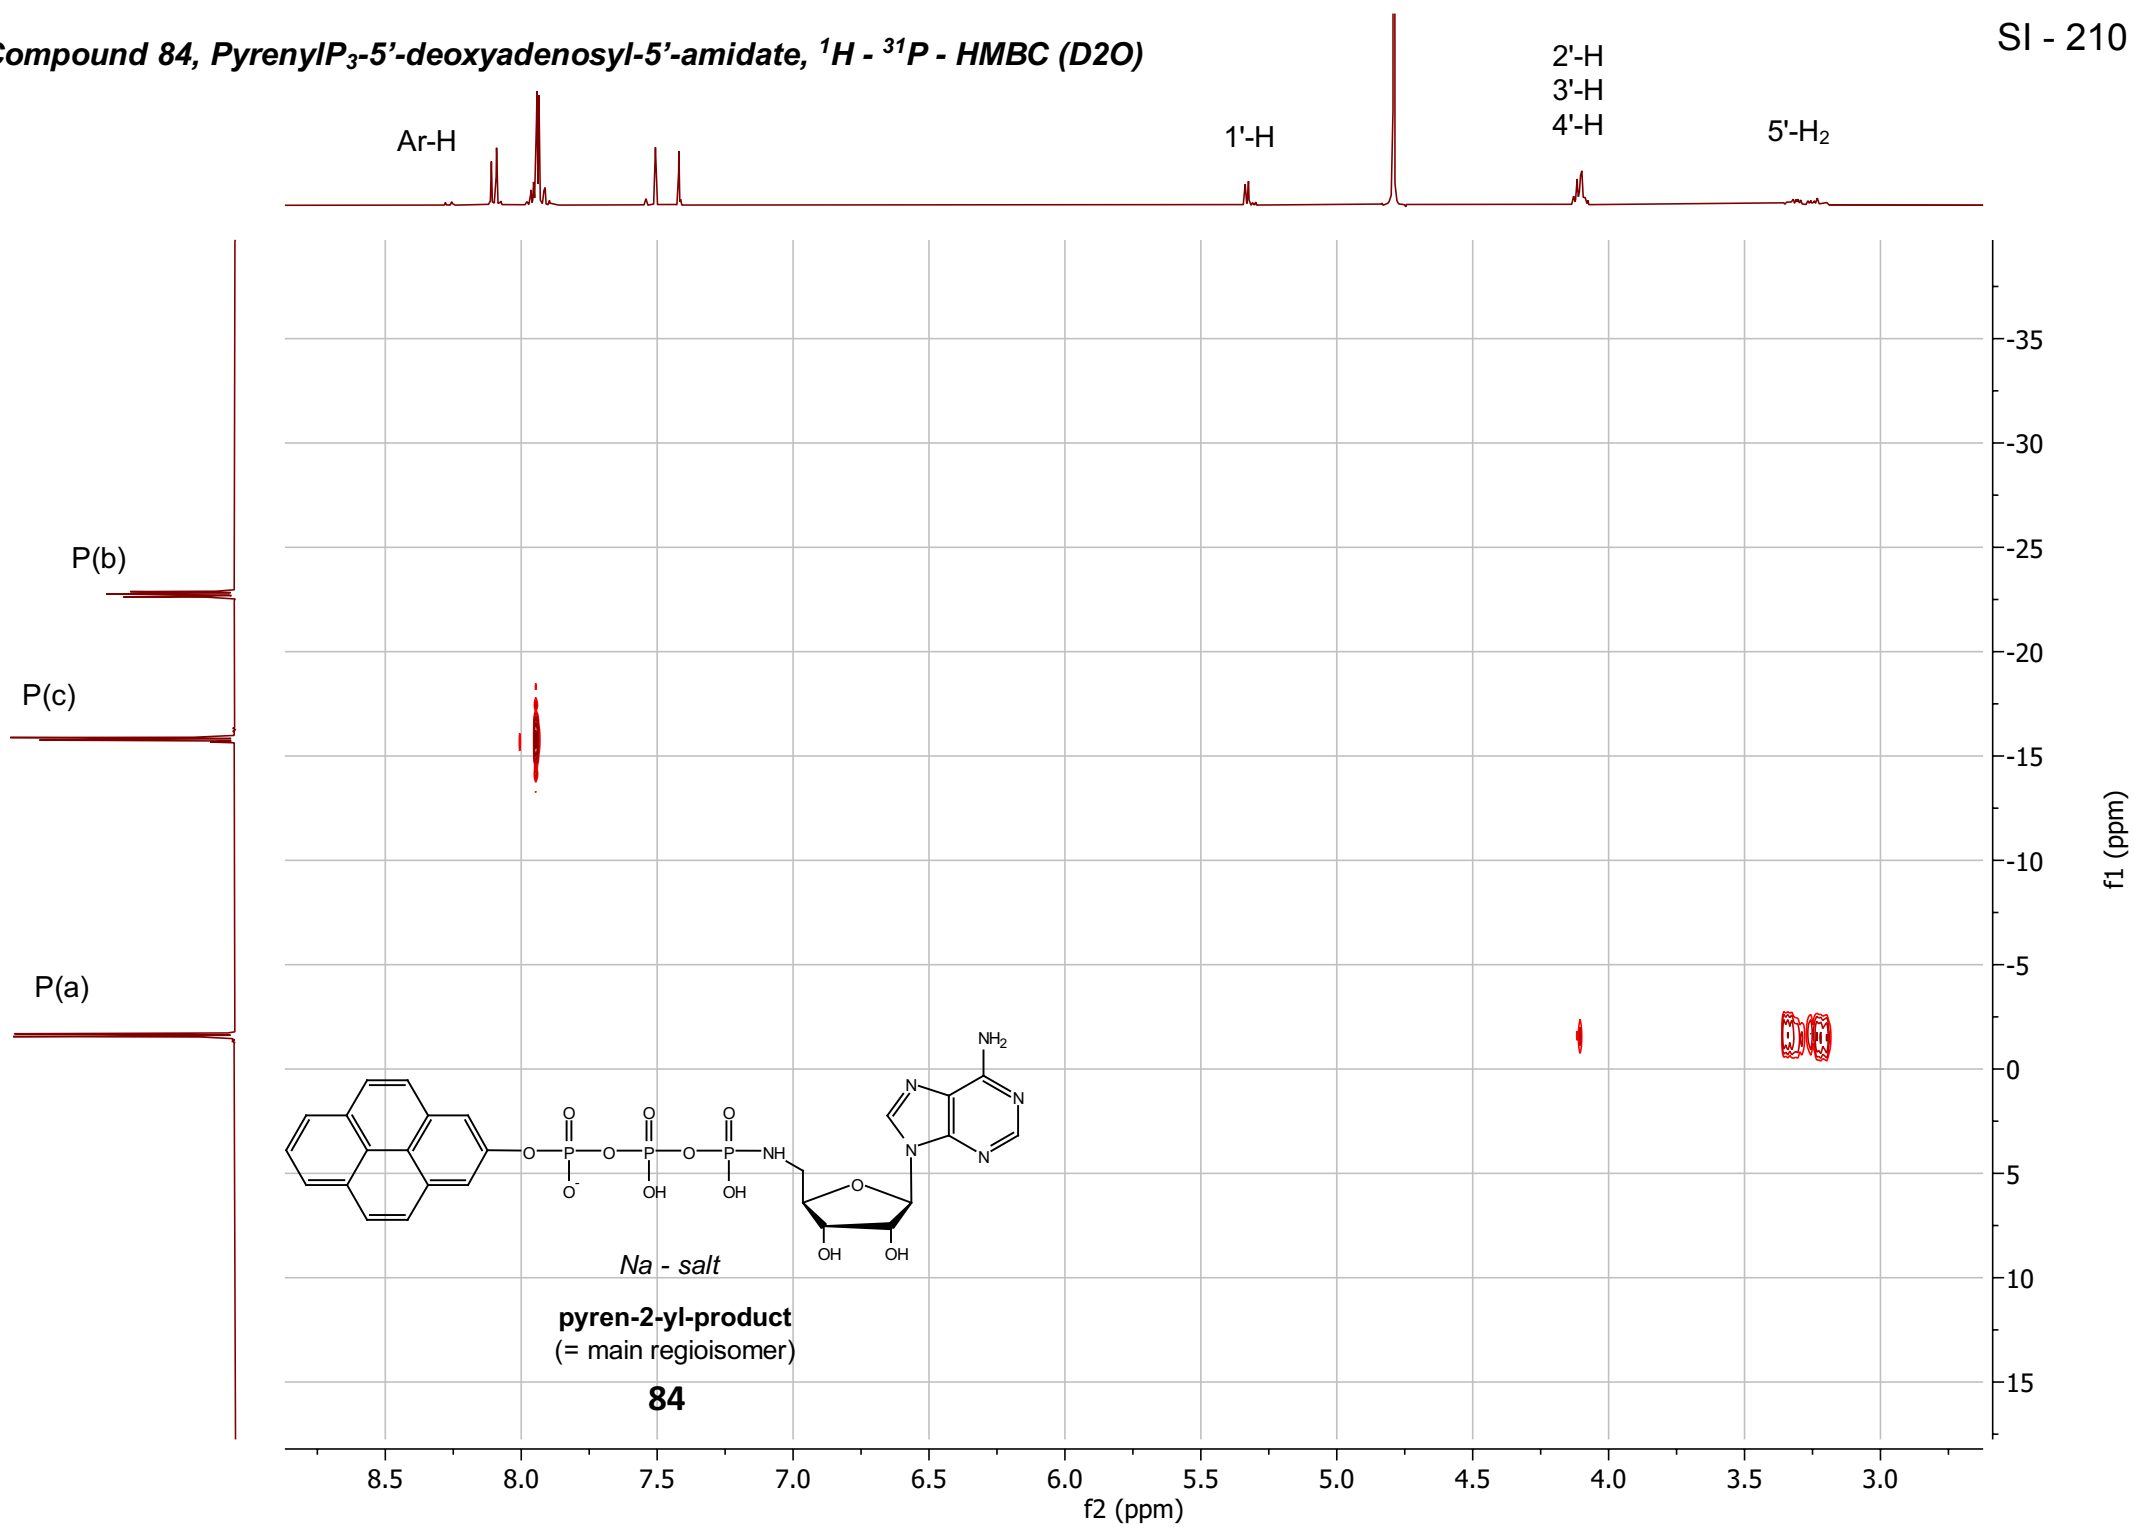

Compound 84, PyrenylP<sub>3</sub>-5'-deoxyadenosyl-5'-amidate, <sup>13</sup>C{<sup>1</sup>H} - NMR (D<sub>2</sub>O, 101 MHz)

SI - 211

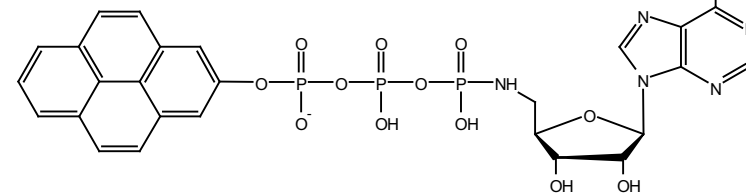

Na - salt

pyren-2-yl-product  
(= main regioisomer)

84

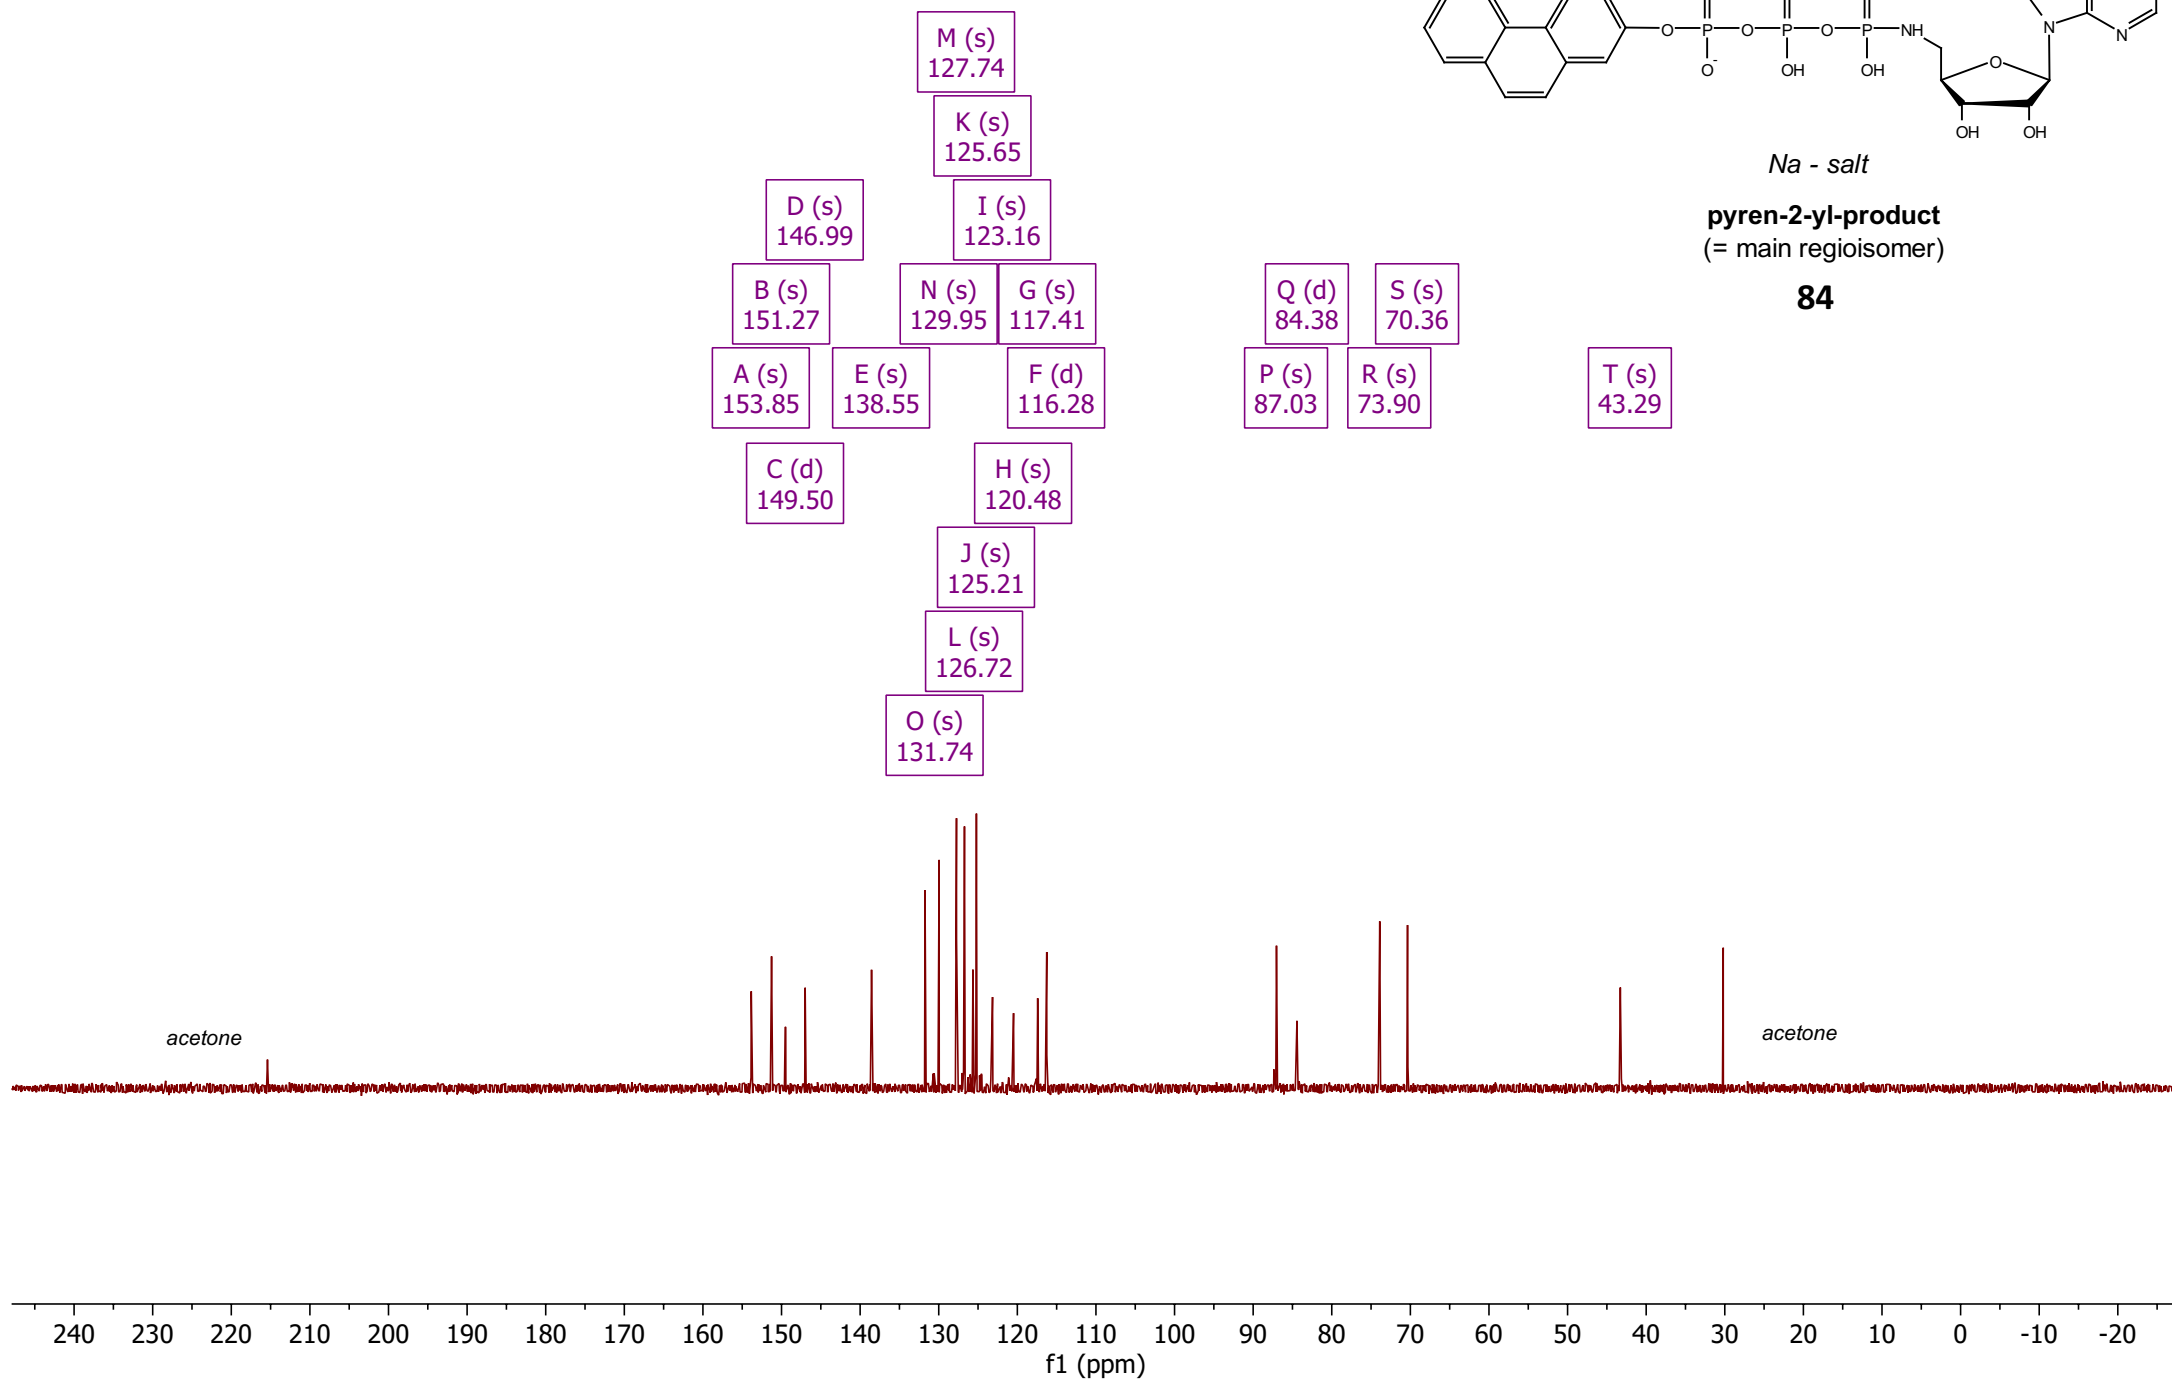

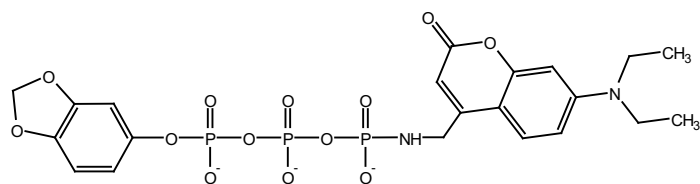

Na -salt  
**85**

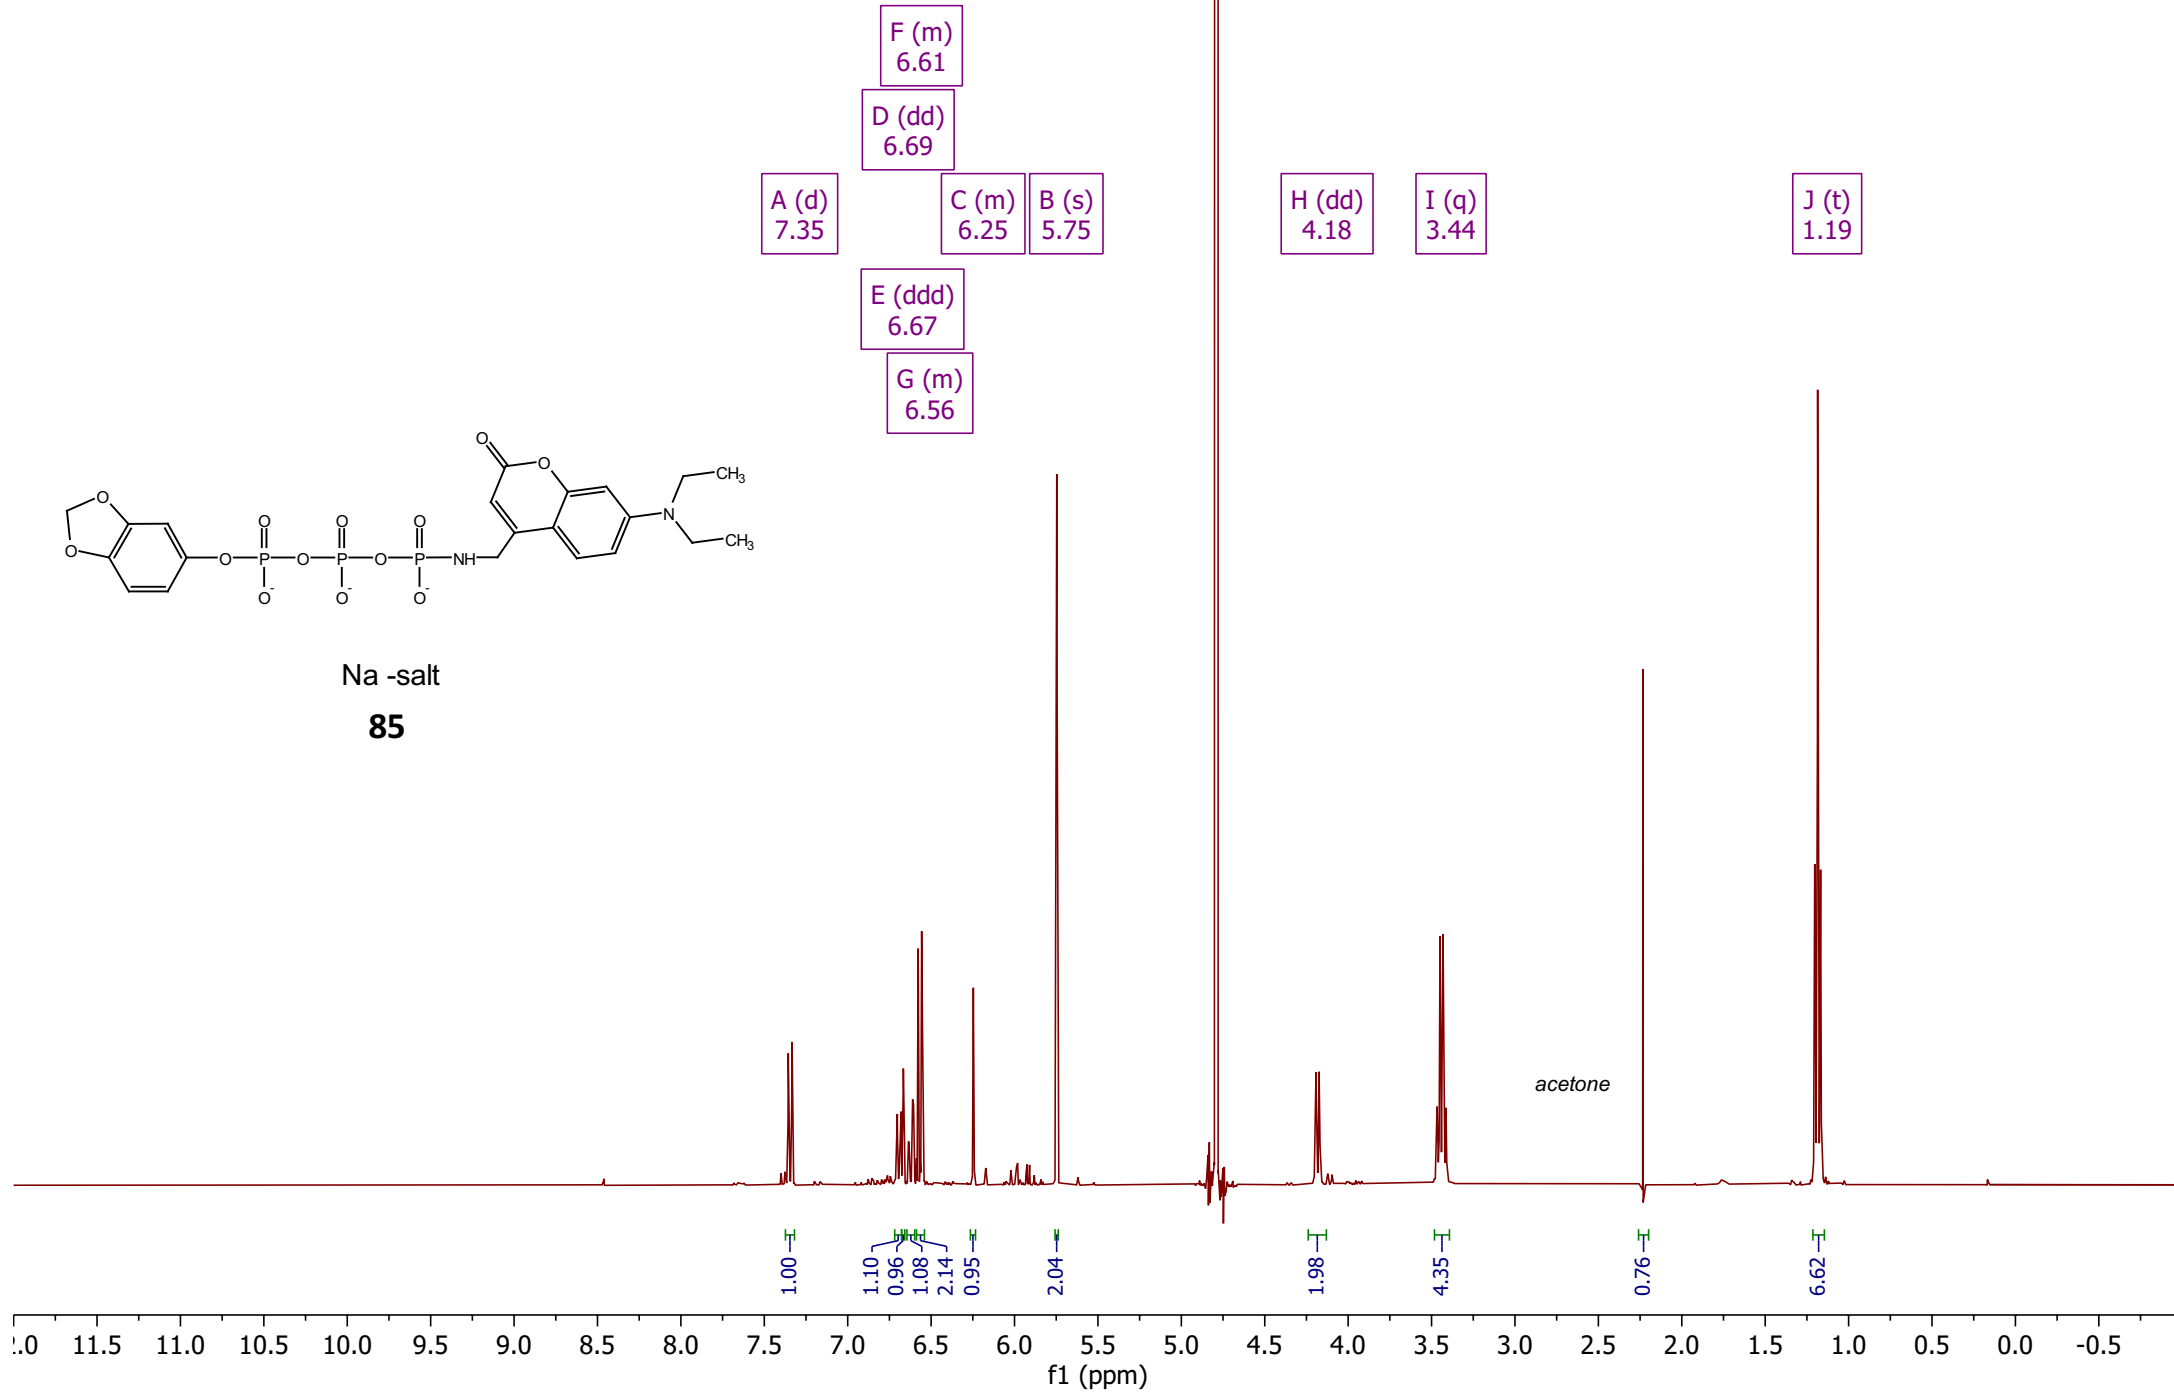

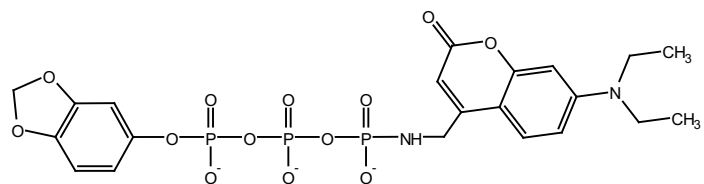

Na -salt  
**85**

B (d)  
-15.87  
A (d)  
-2.28  
C (t)  
-22.92

A (d)  
-2.28

B (d)  
-15.87

C (t)  
-22.92

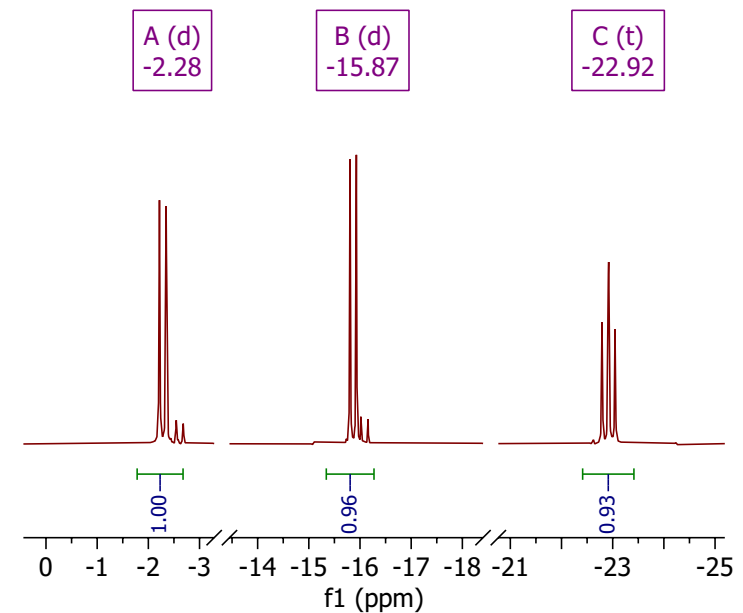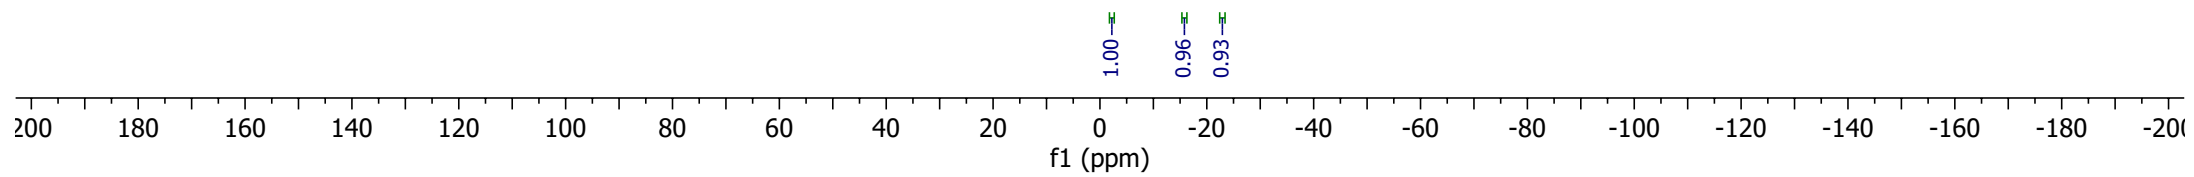



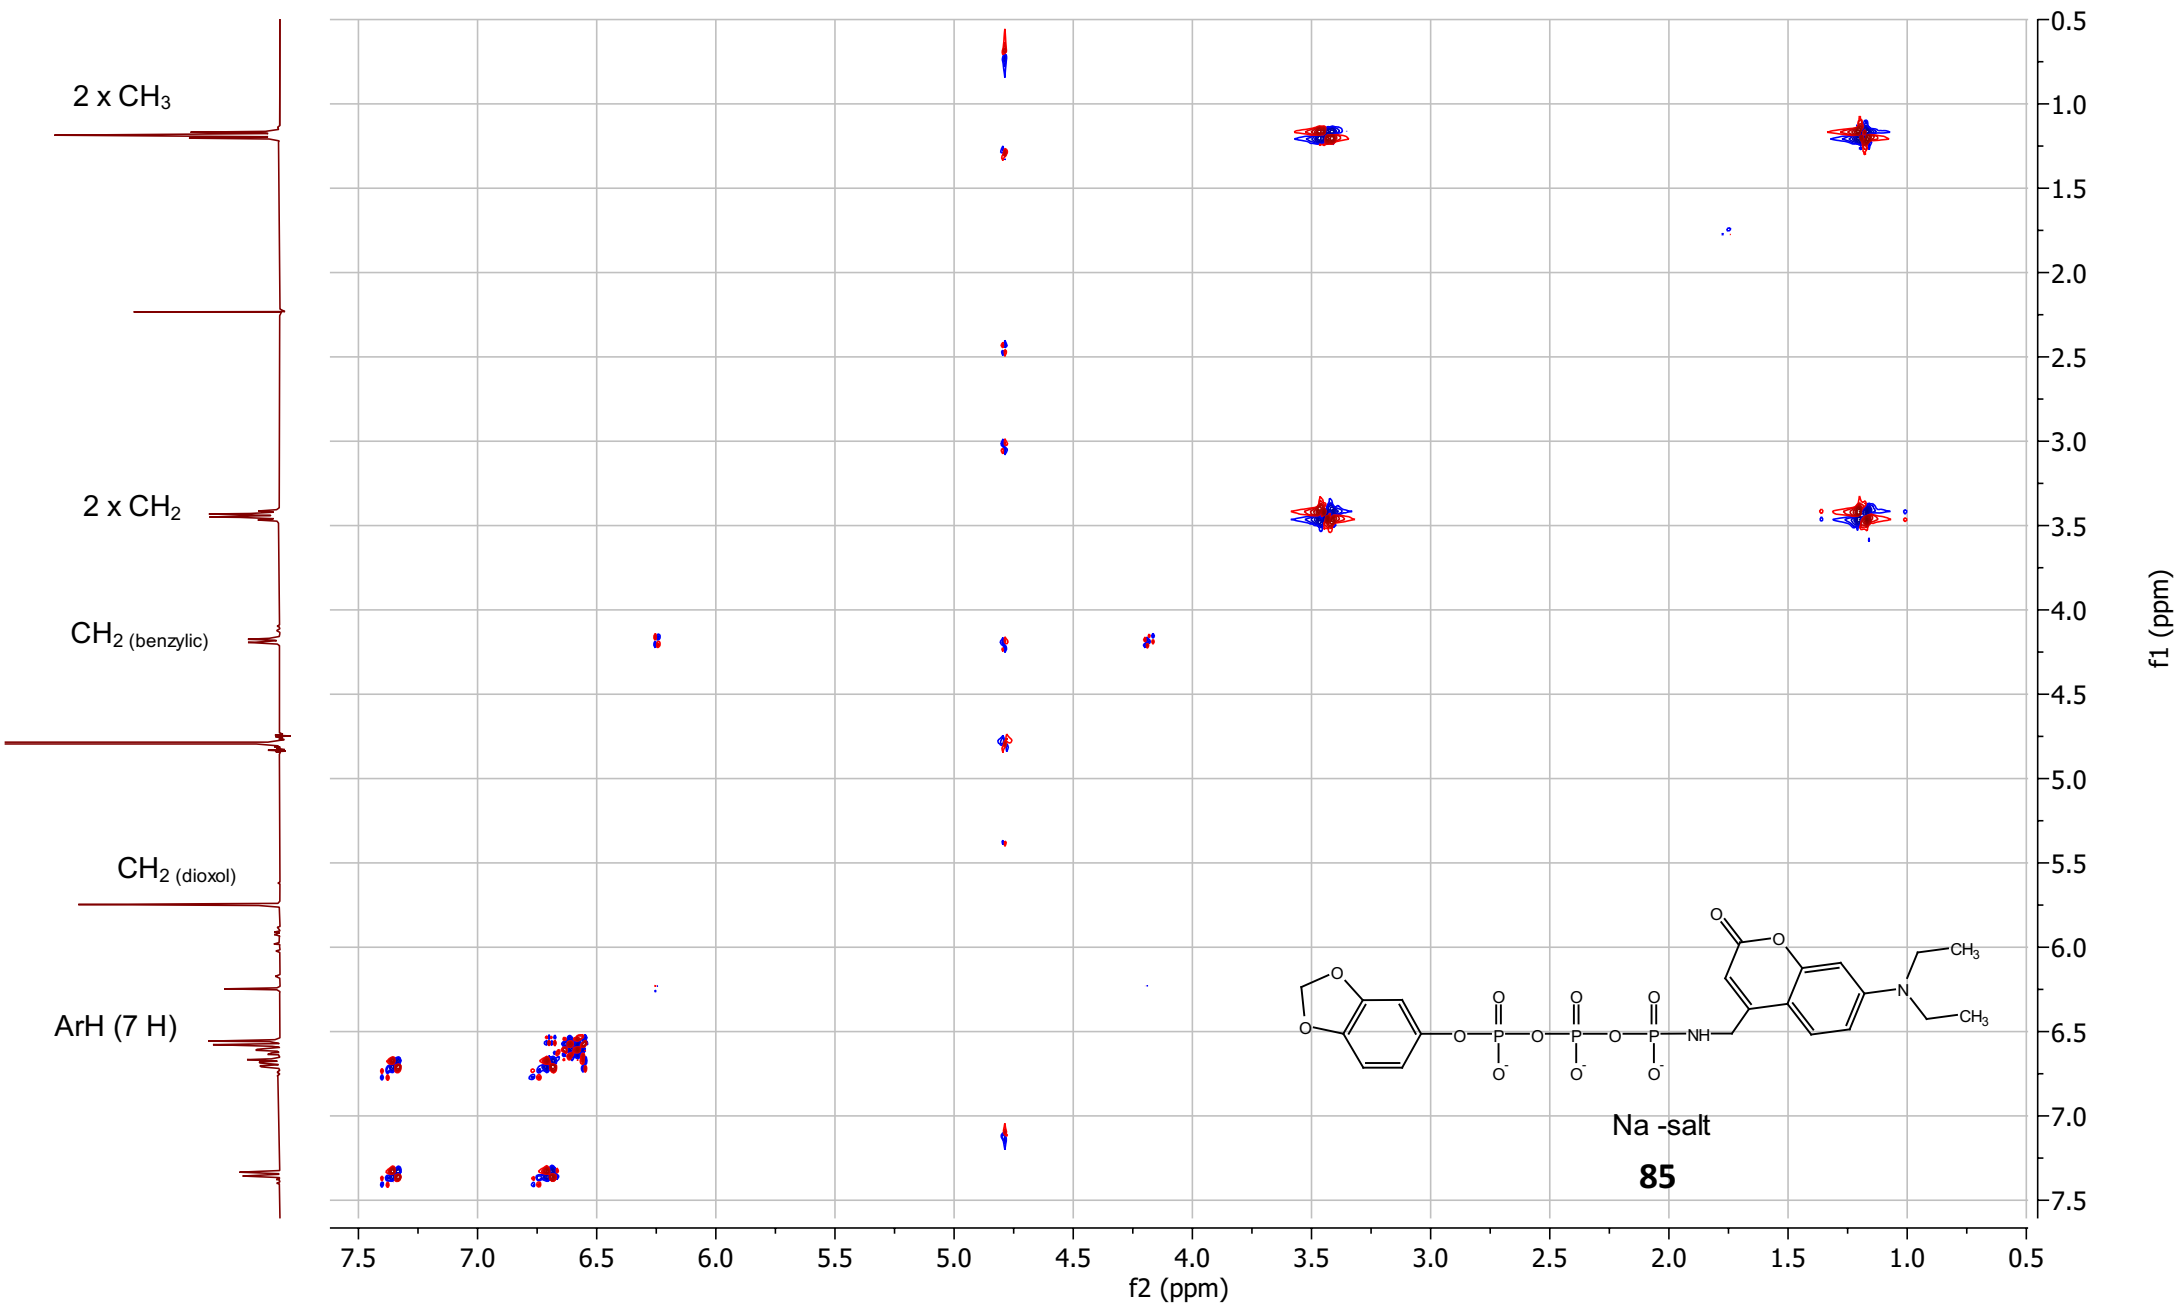

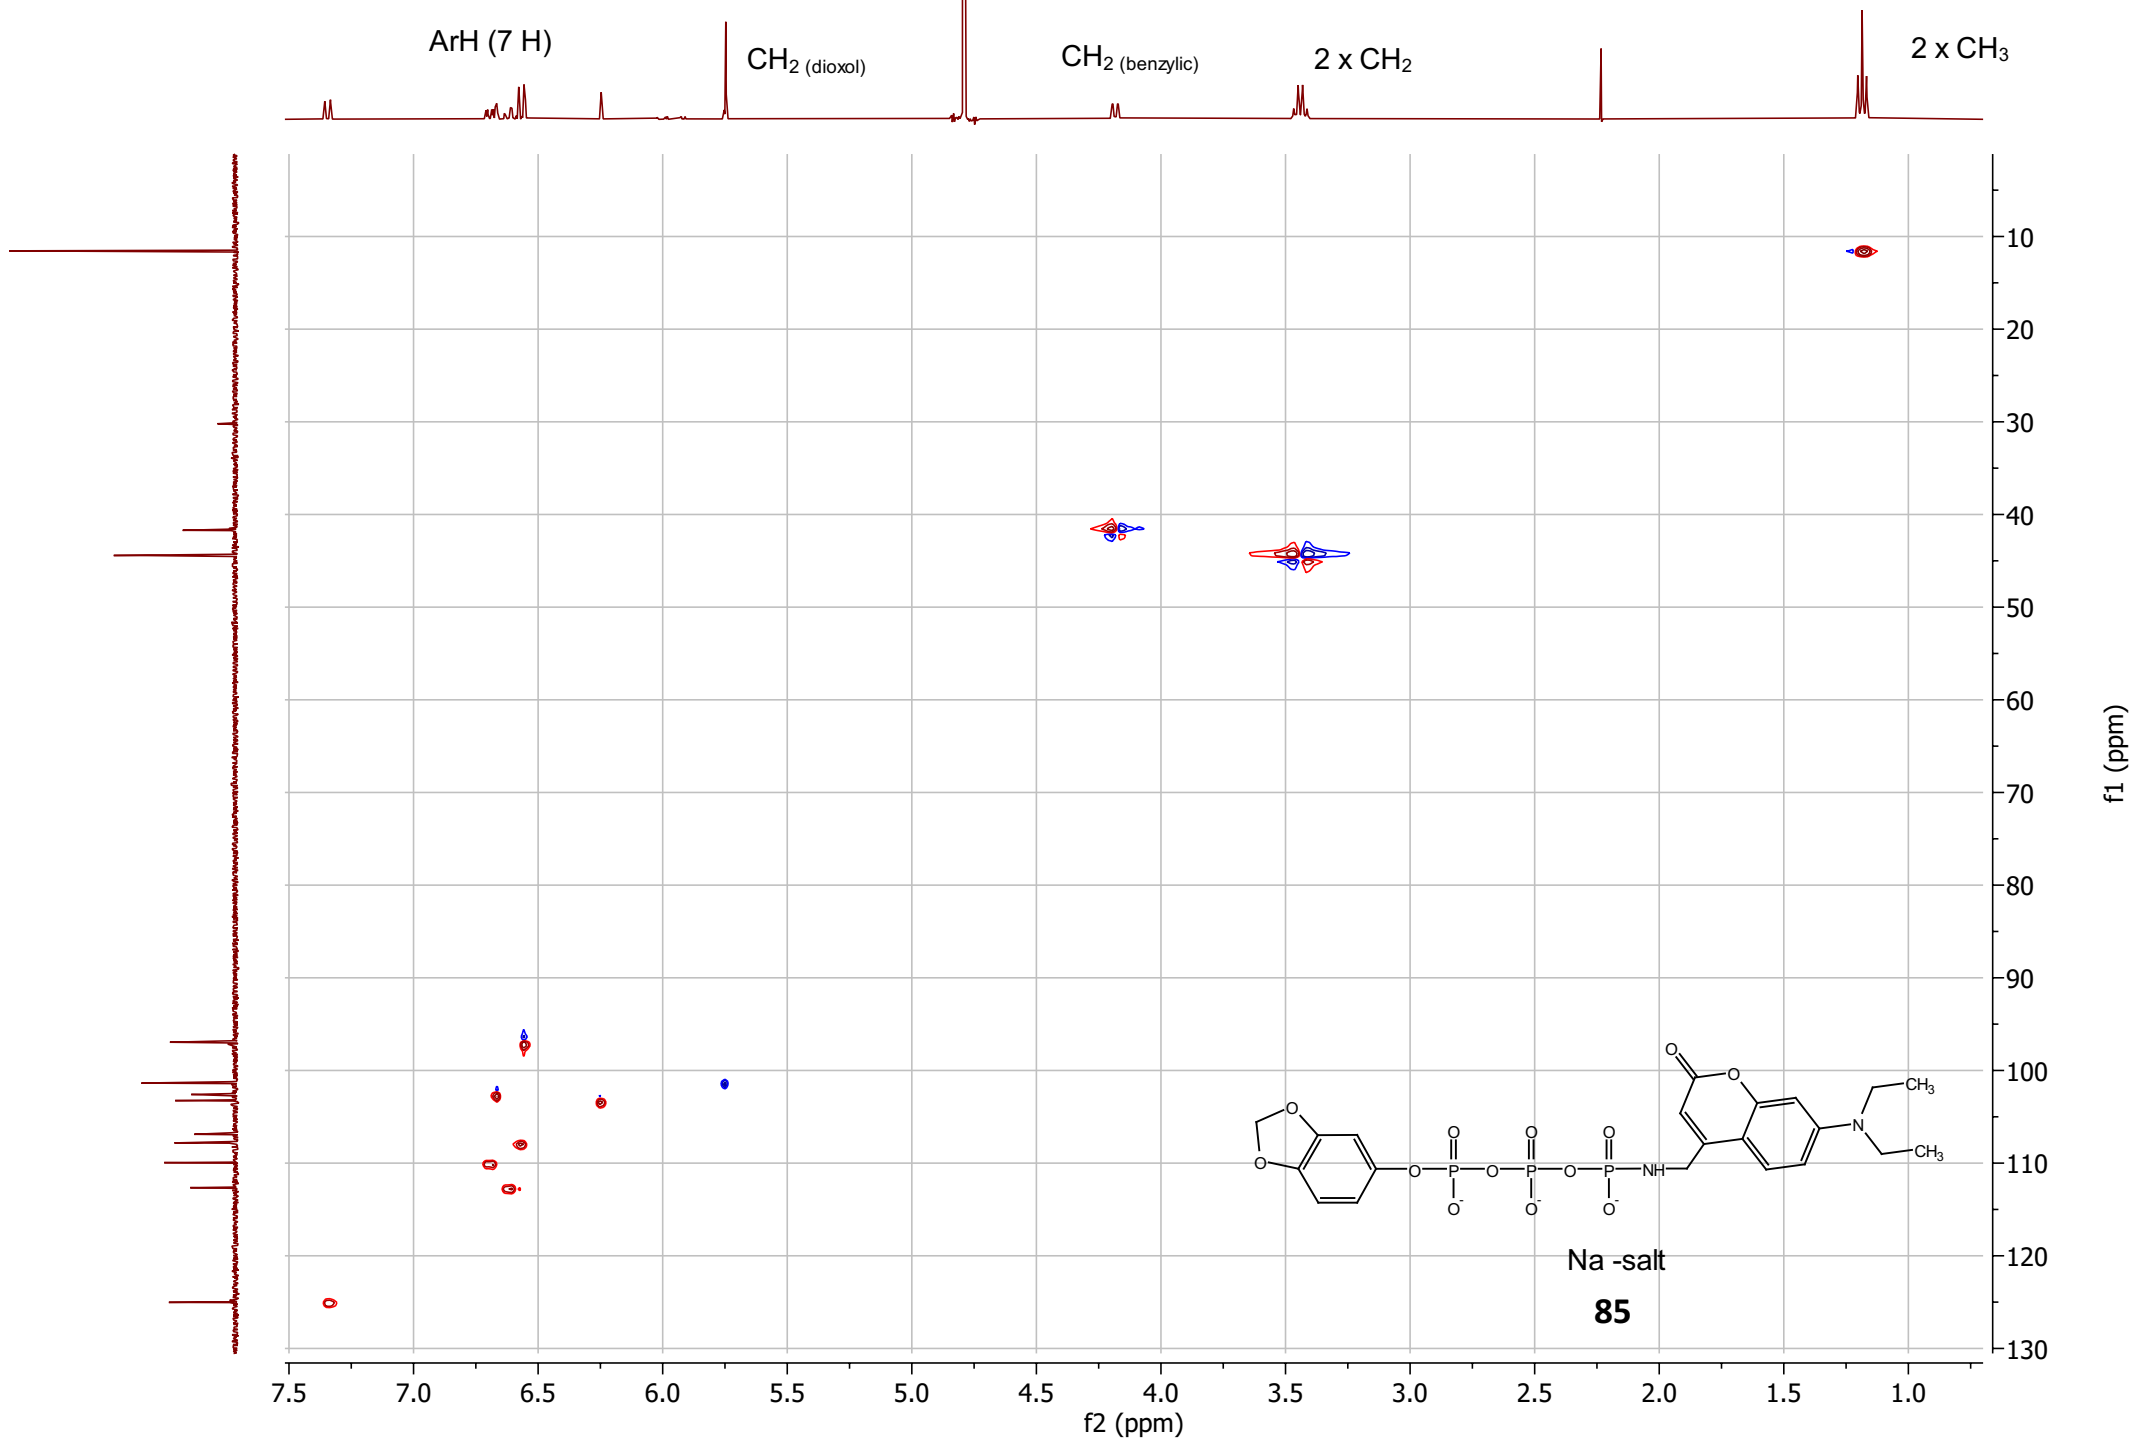

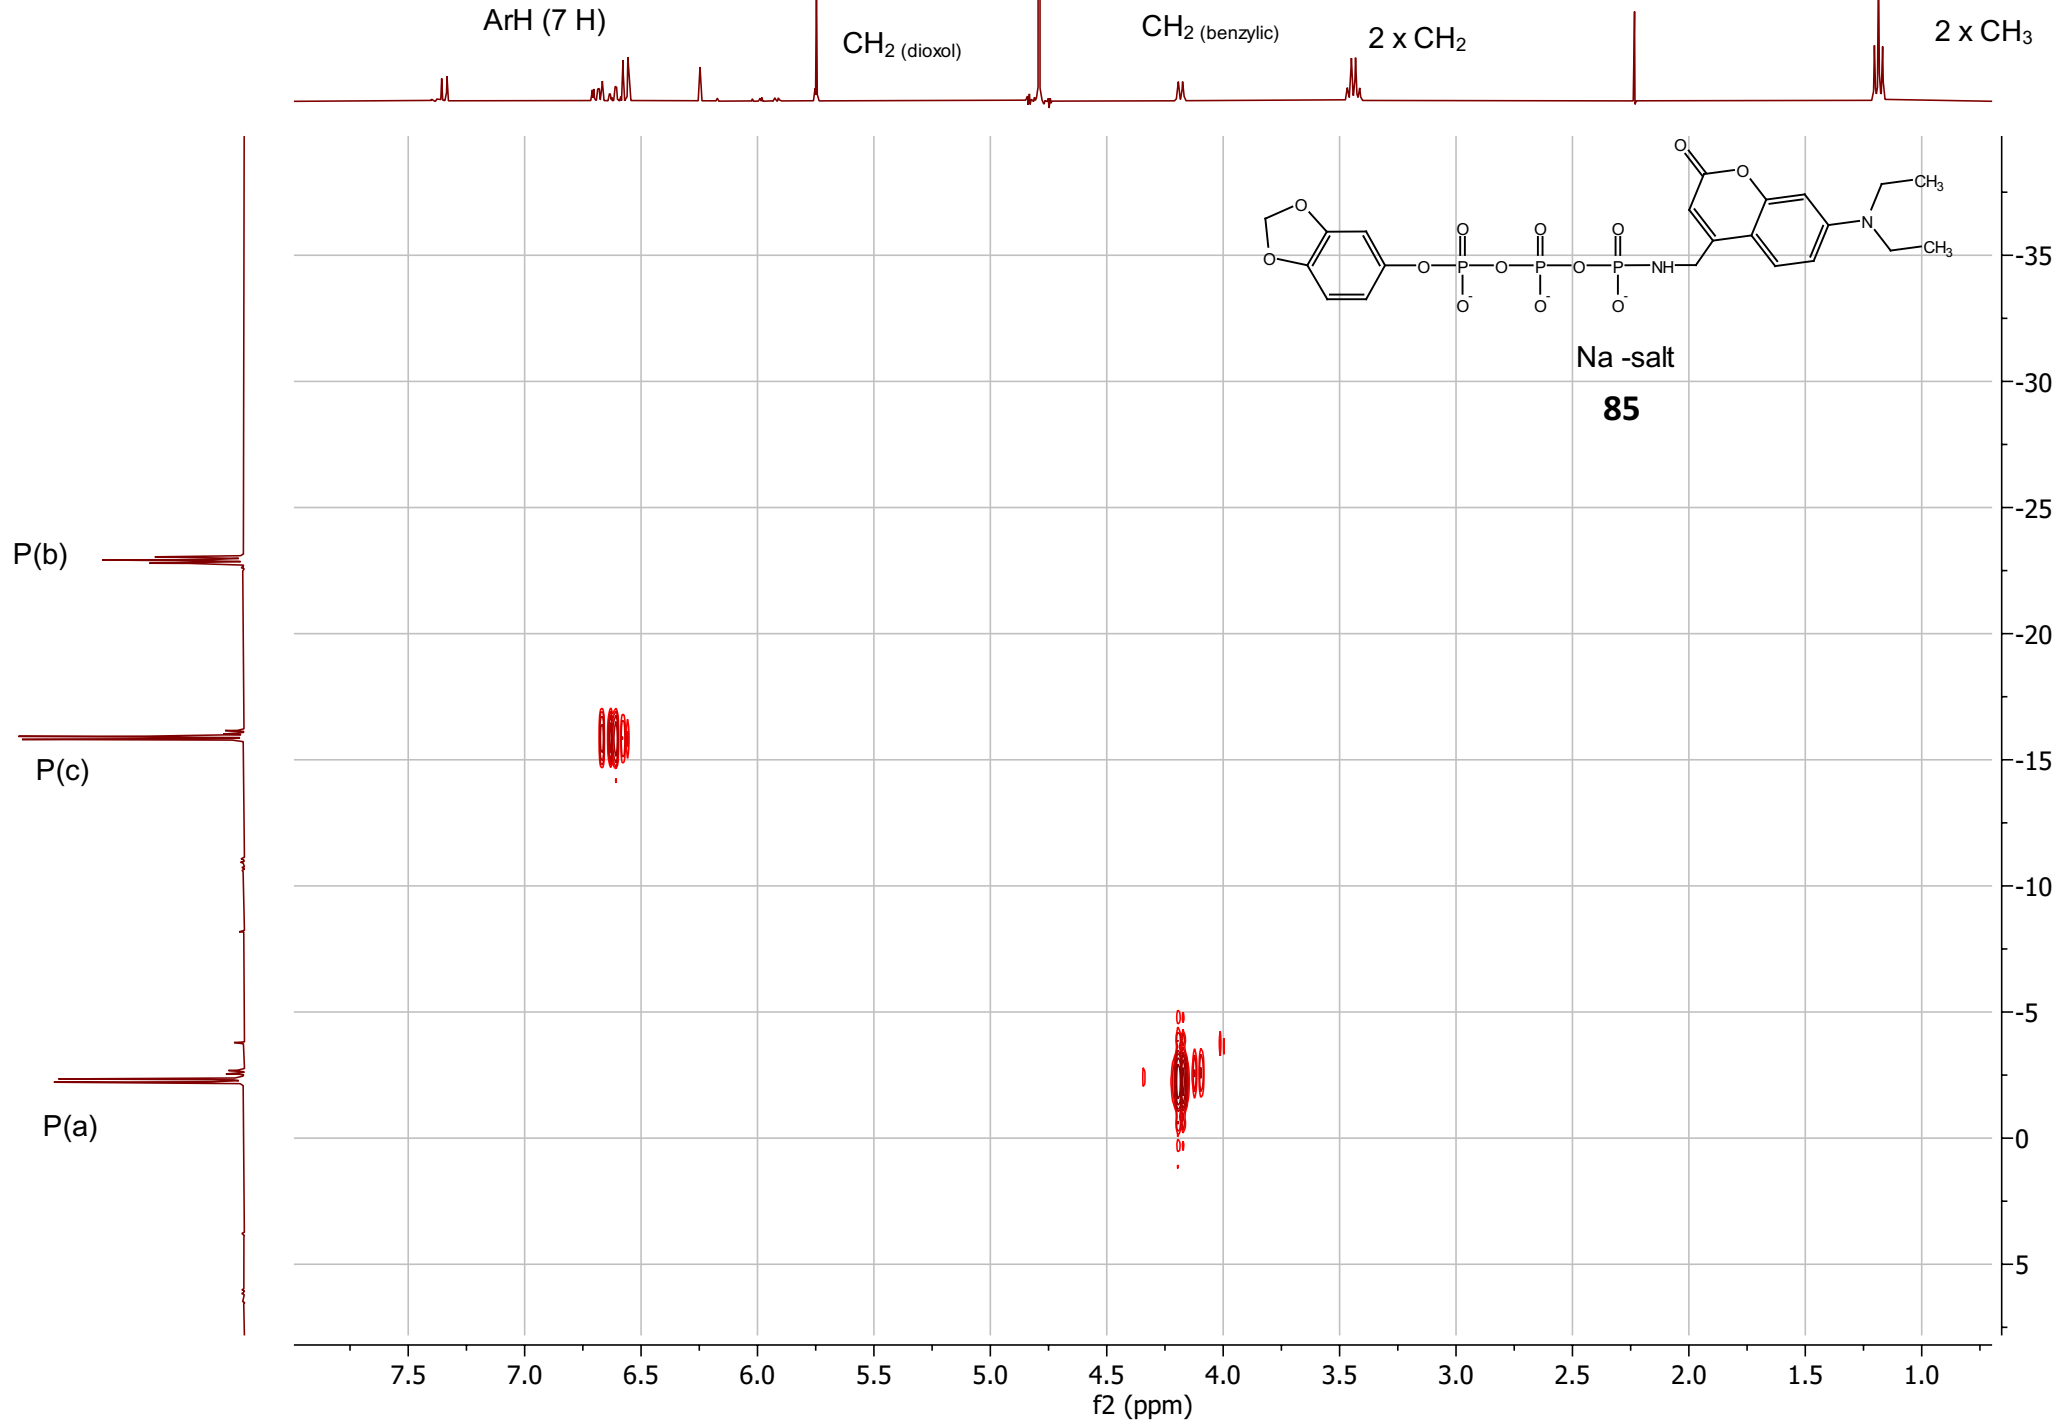

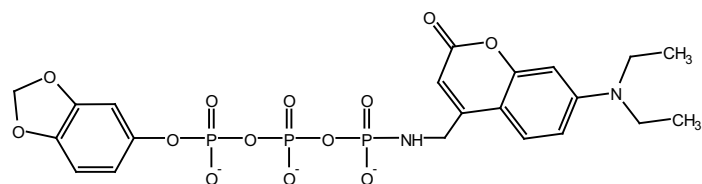

Na -salt  
**85**

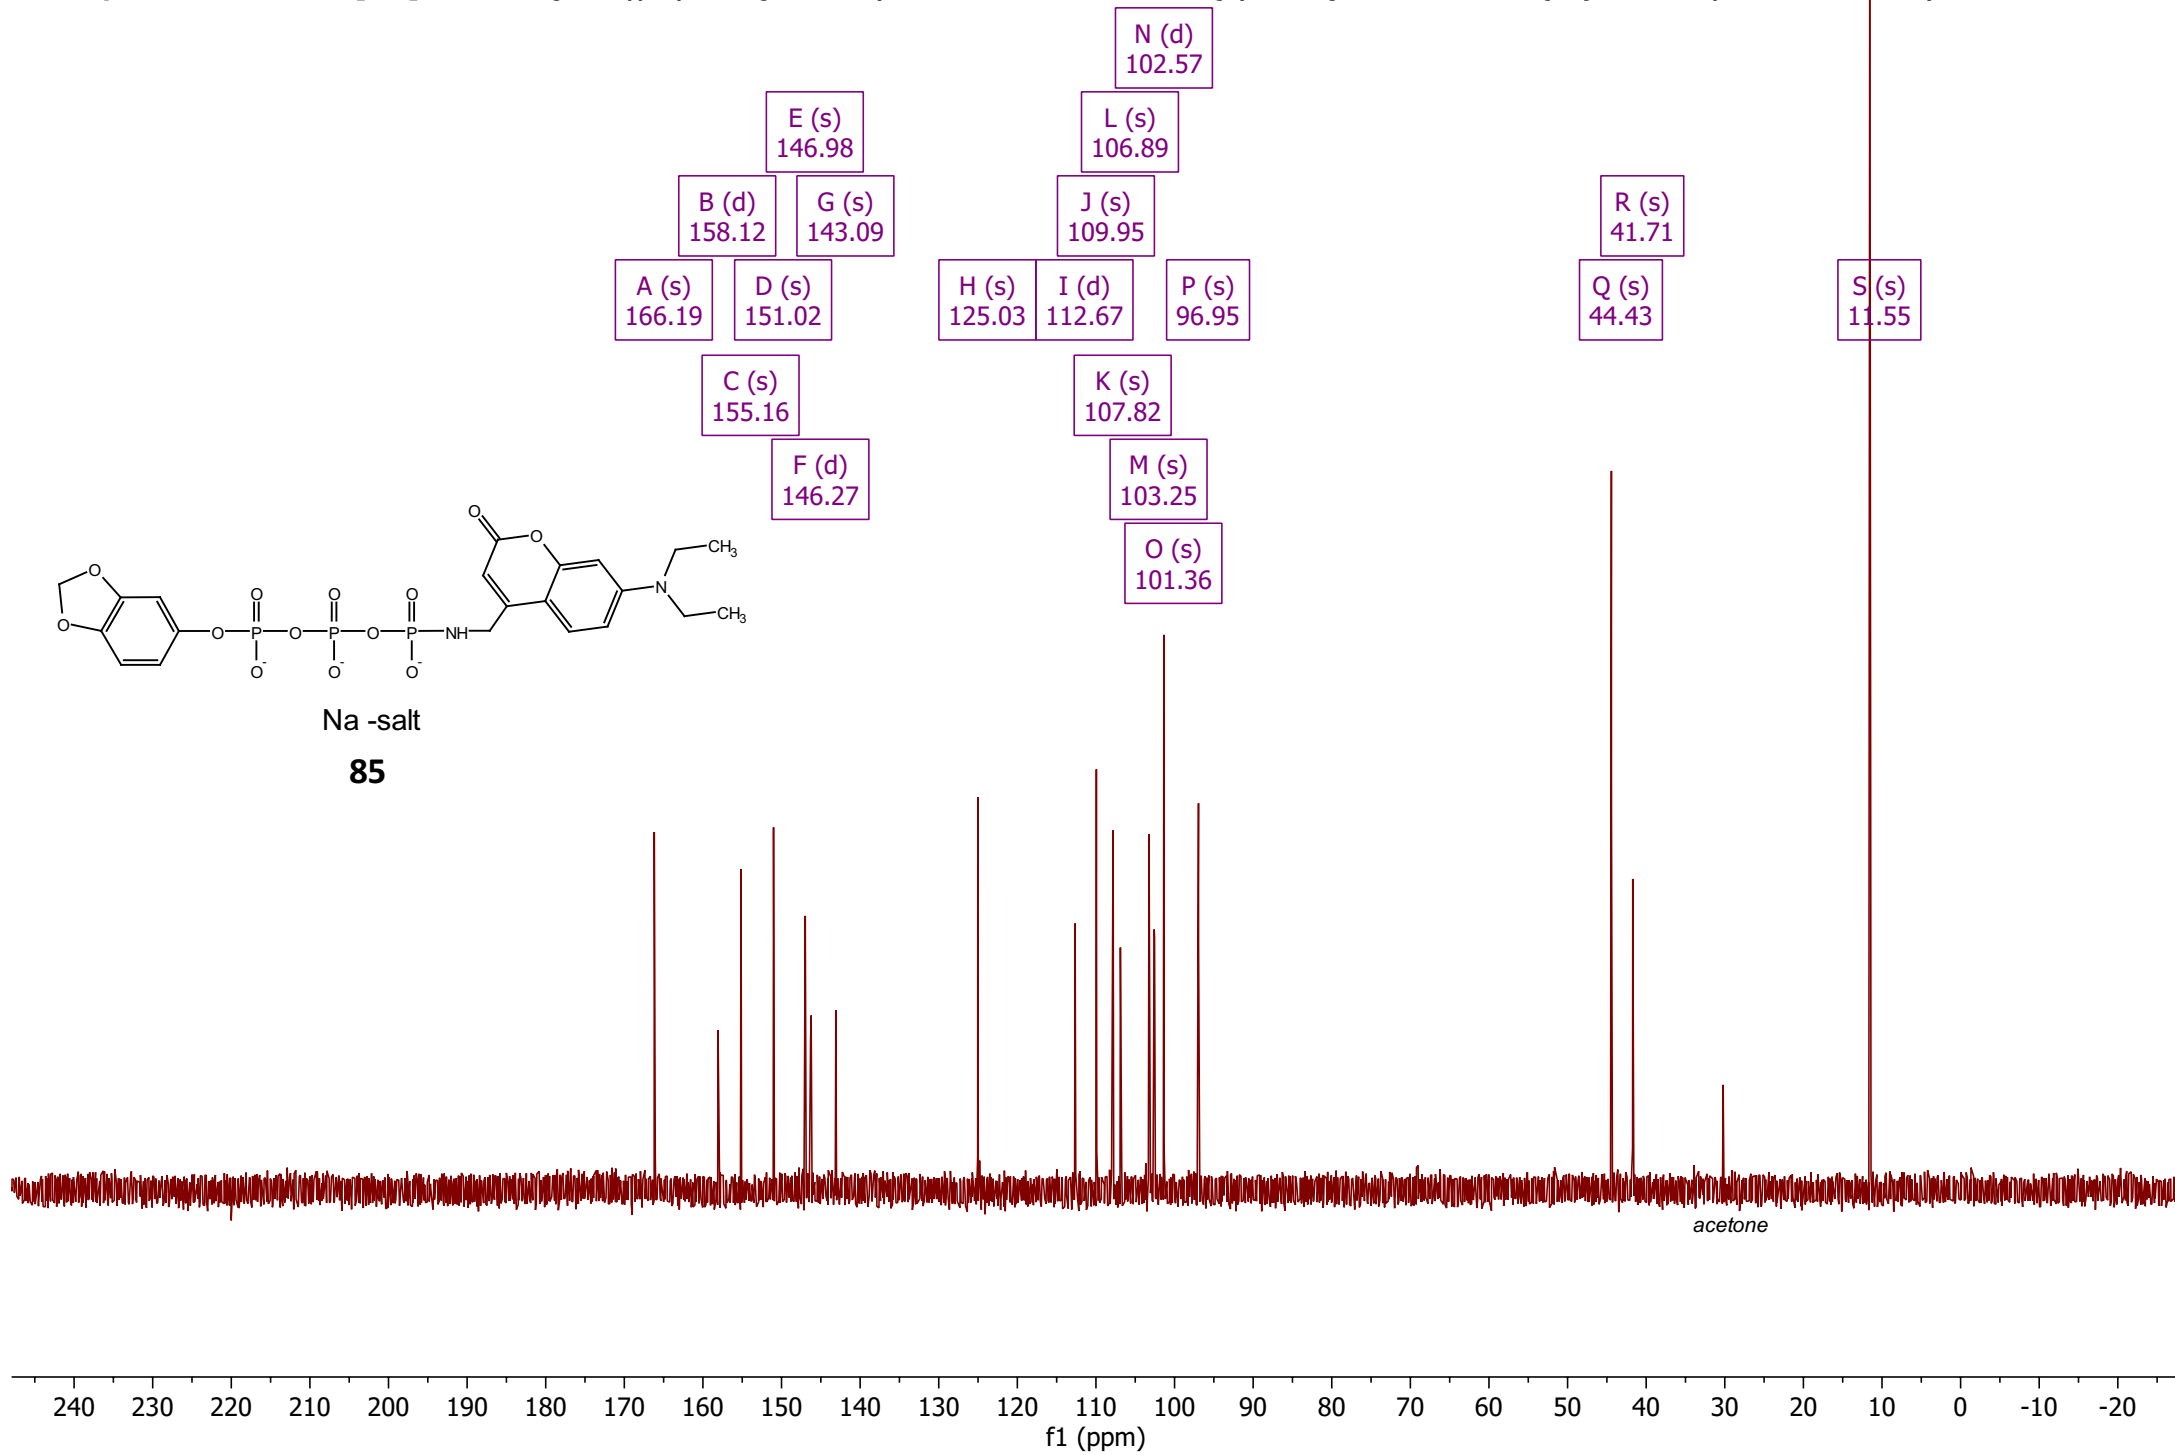

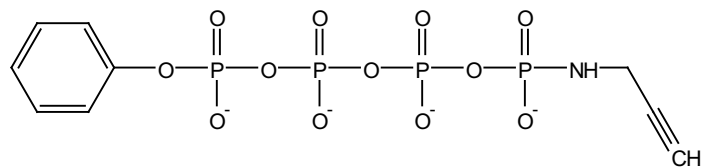

TEA - salt  
**86**

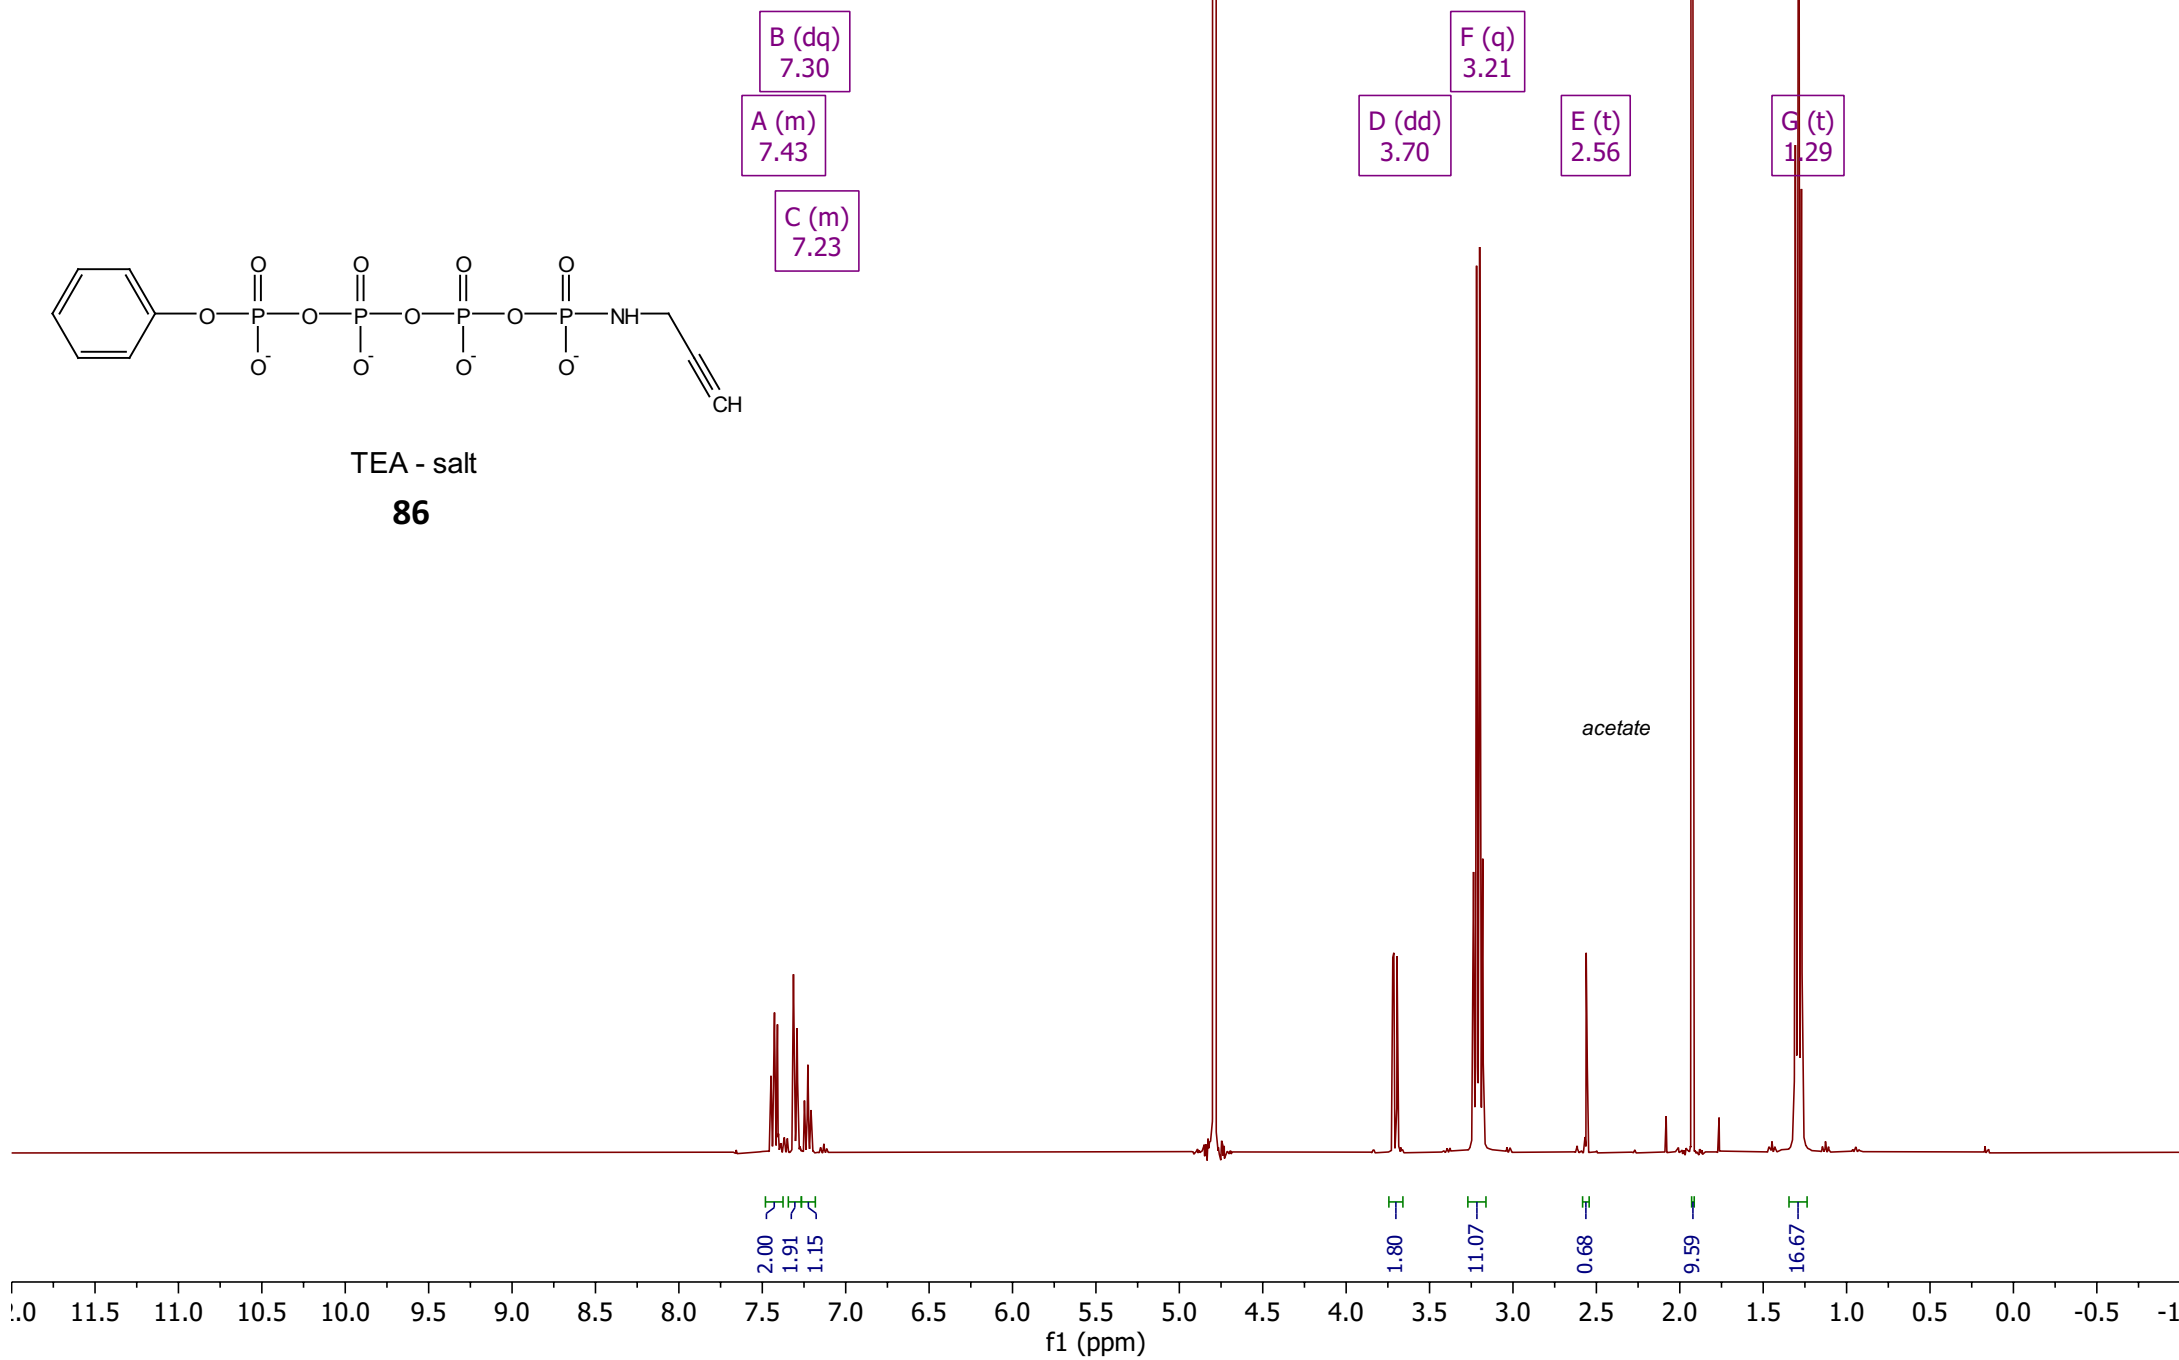

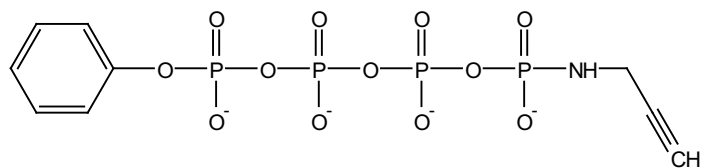

TEA - salt  
**86**

C (d)  
-15.70  
B (d)  
-2.52  
A (m)  
-22.83

B (d)  
-2.52

C (d)  
-15.70

A (m)  
-22.83

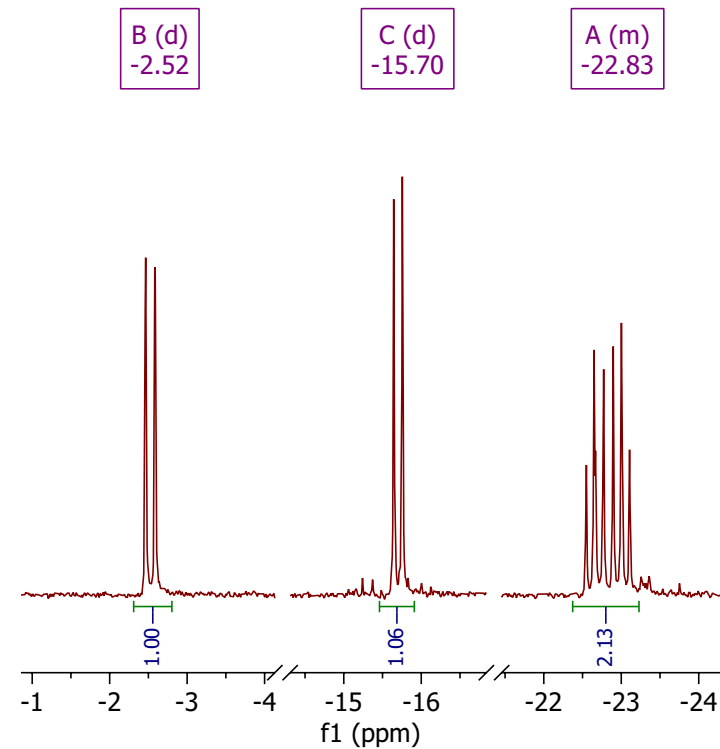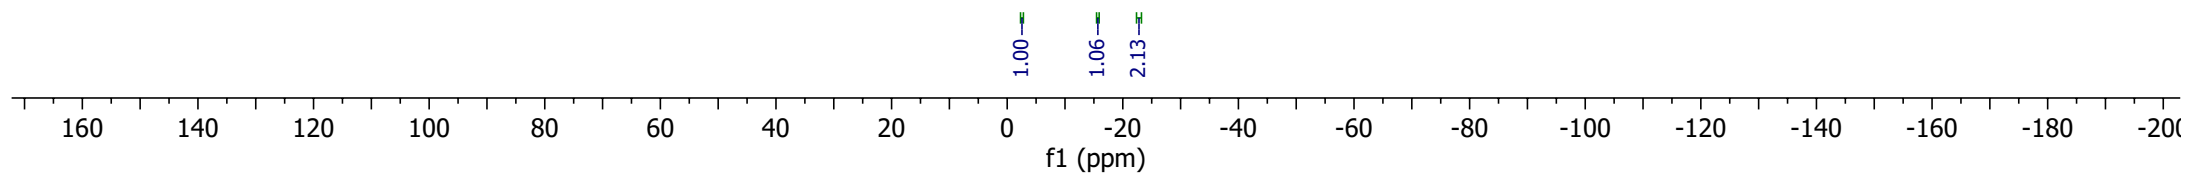

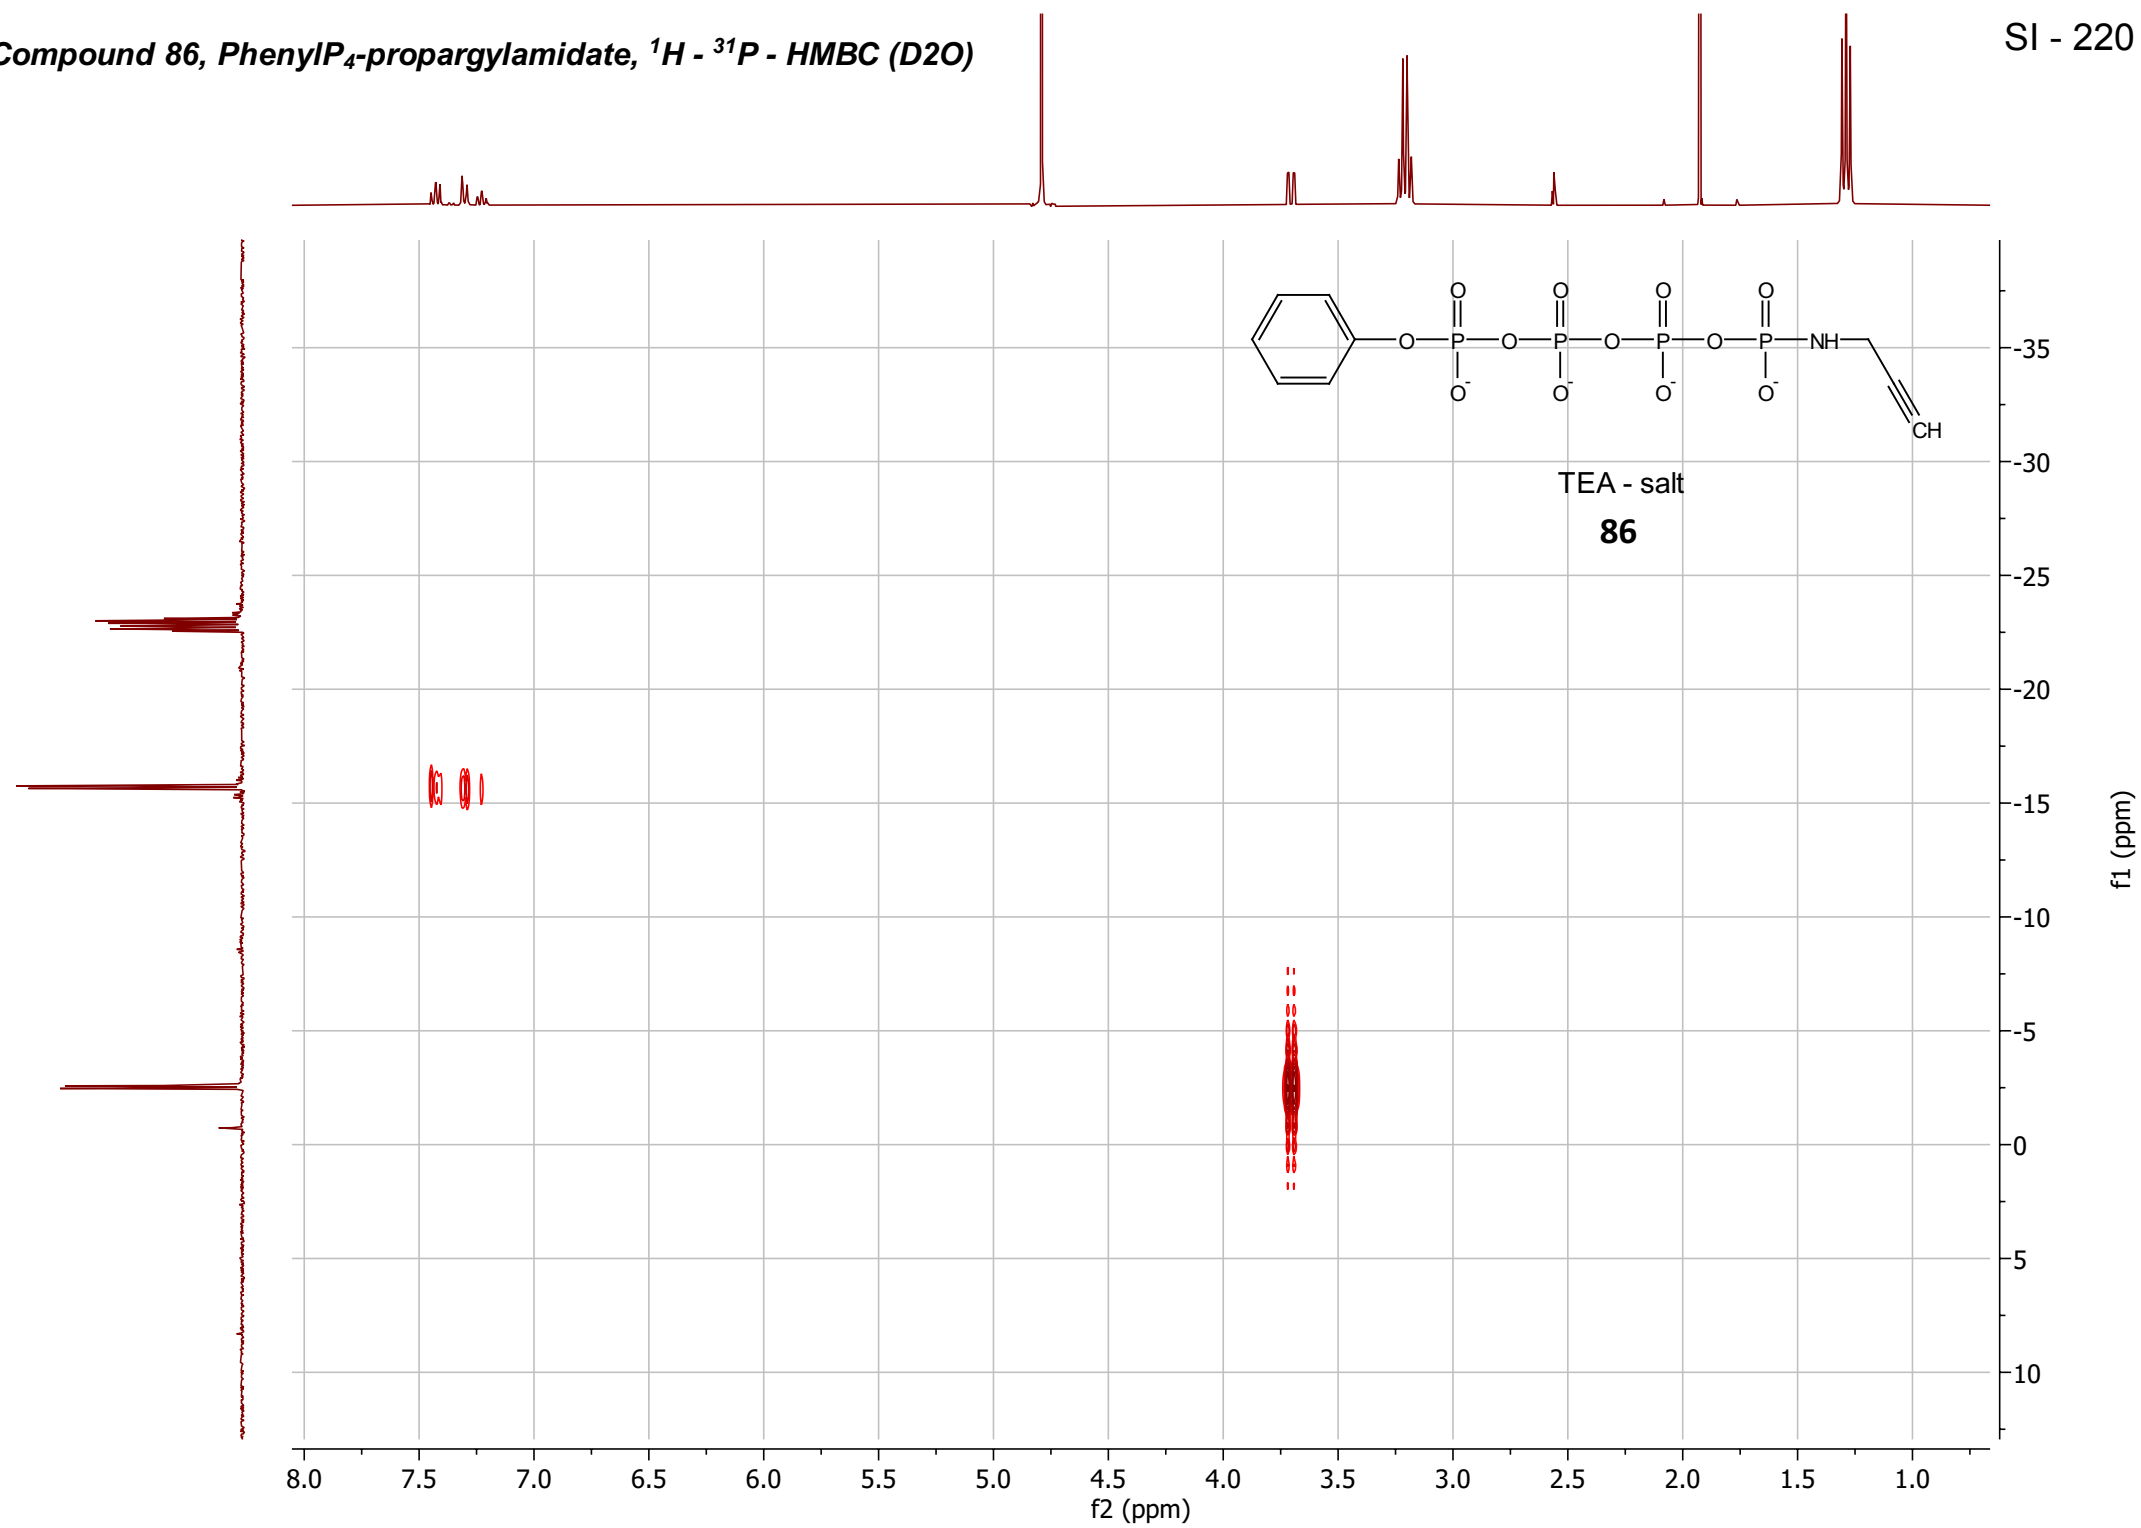

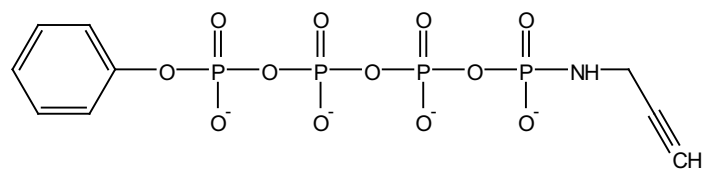

TEA - salt  
**86**

A (d)  
151.73

B (s)  
129.71

C (s)  
124.36

D (d)  
120.65

E (d)  
83.11

F (s)  
71.32

G (s)  
46.64

H (s)  
30.99

I (s)  
8.21

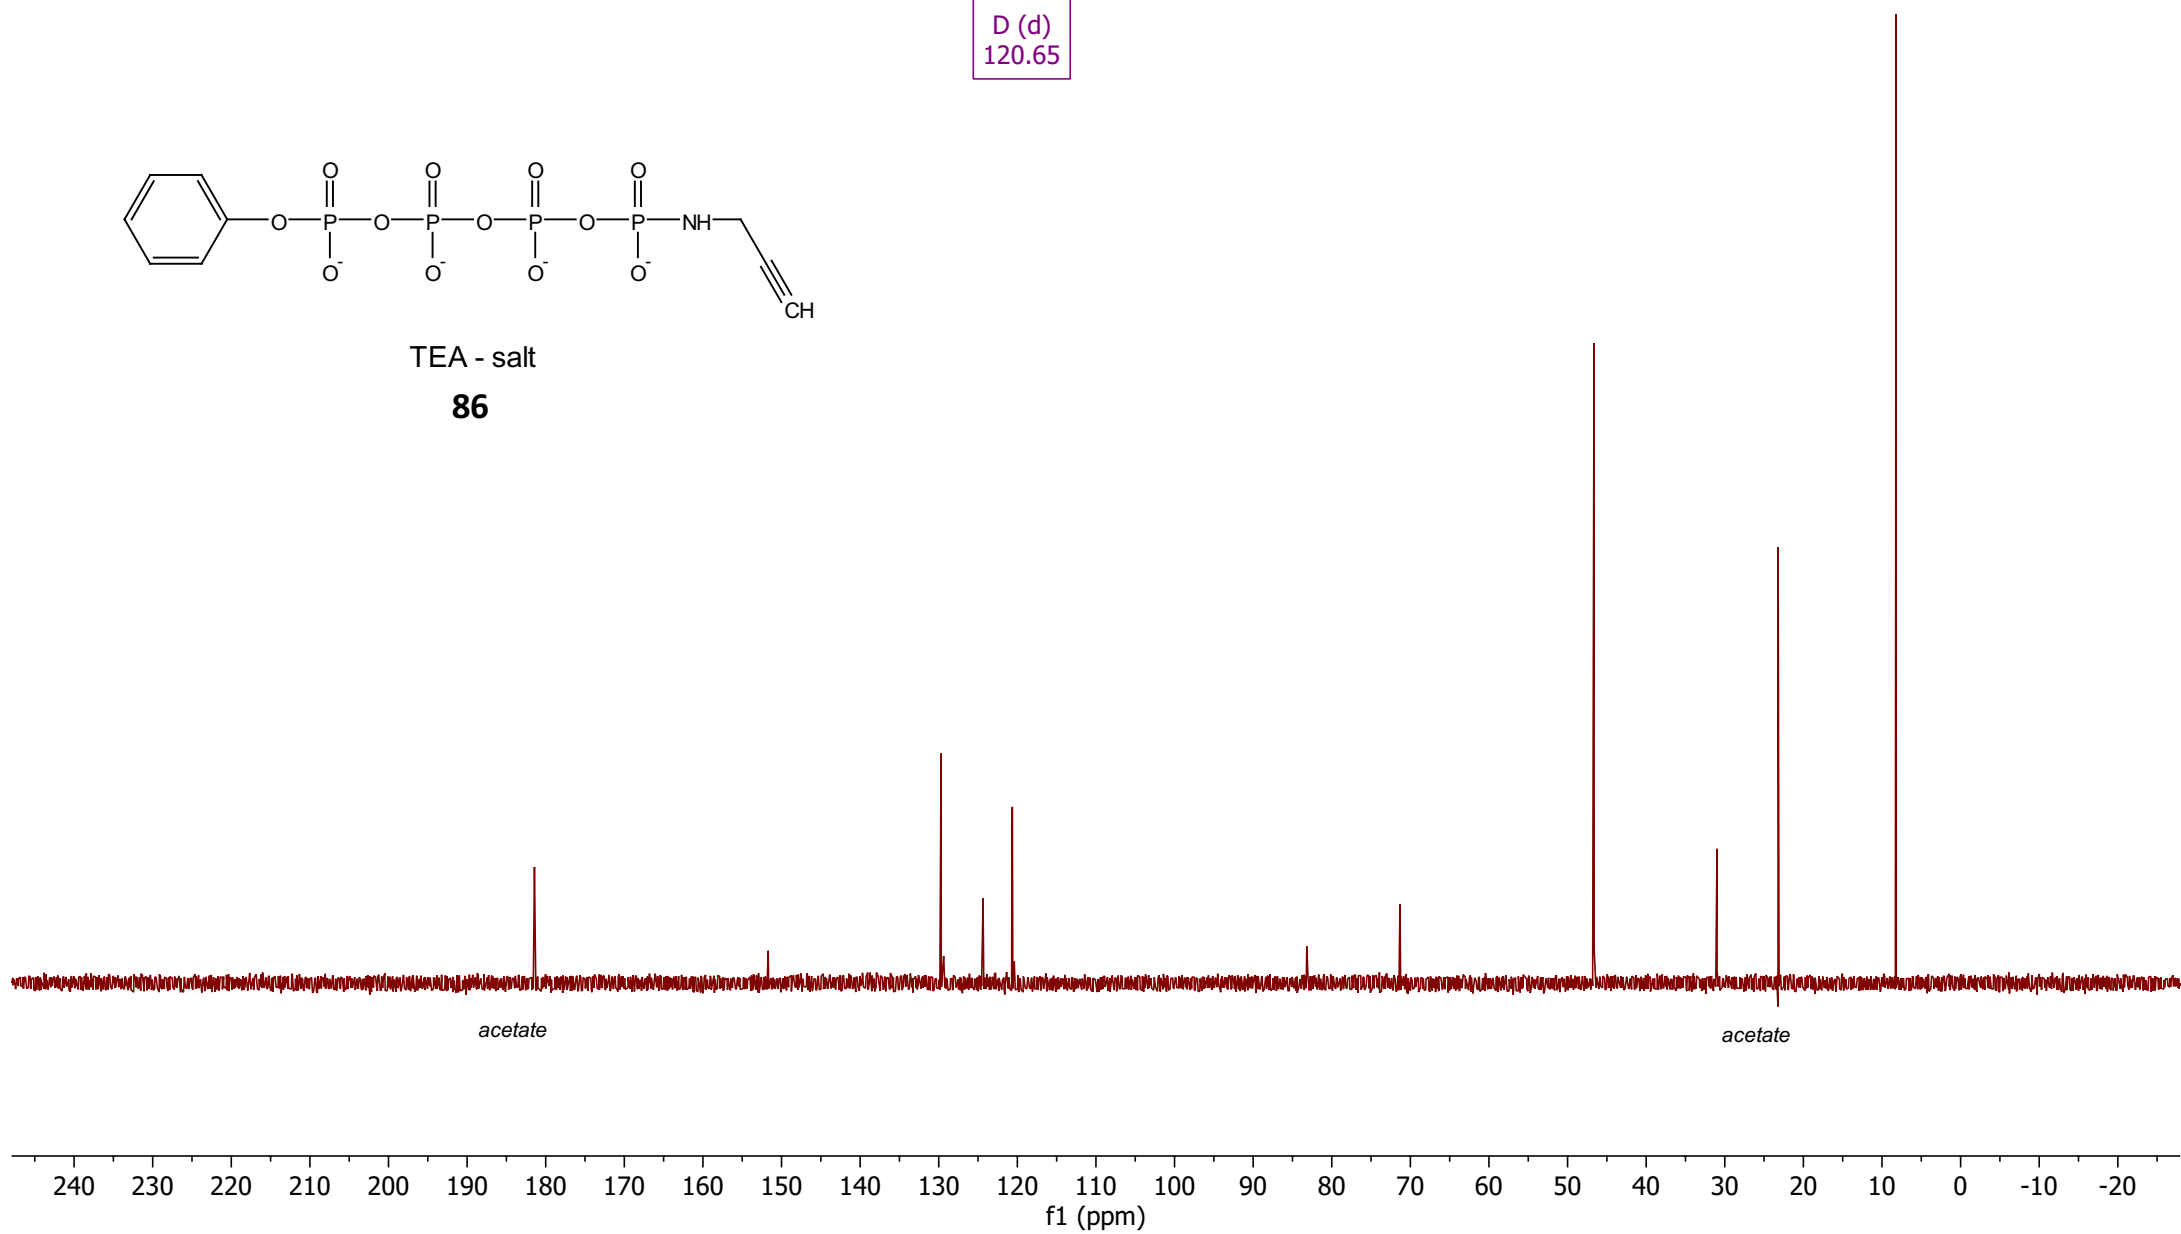



Compound 87, PyrenylP<sub>4</sub>-5'-deoxyguanosyl-5'-amidate, <sup>1</sup>H - NMR (D<sub>2</sub>O, 400 MHz)

SI - 222

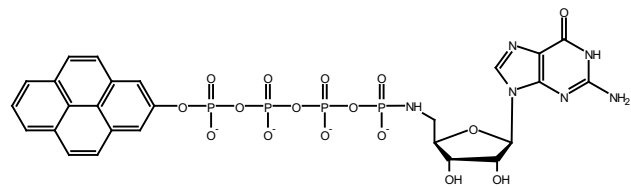

Na - salt

pyren-2-yl-product  
(= main regioisomer)

87

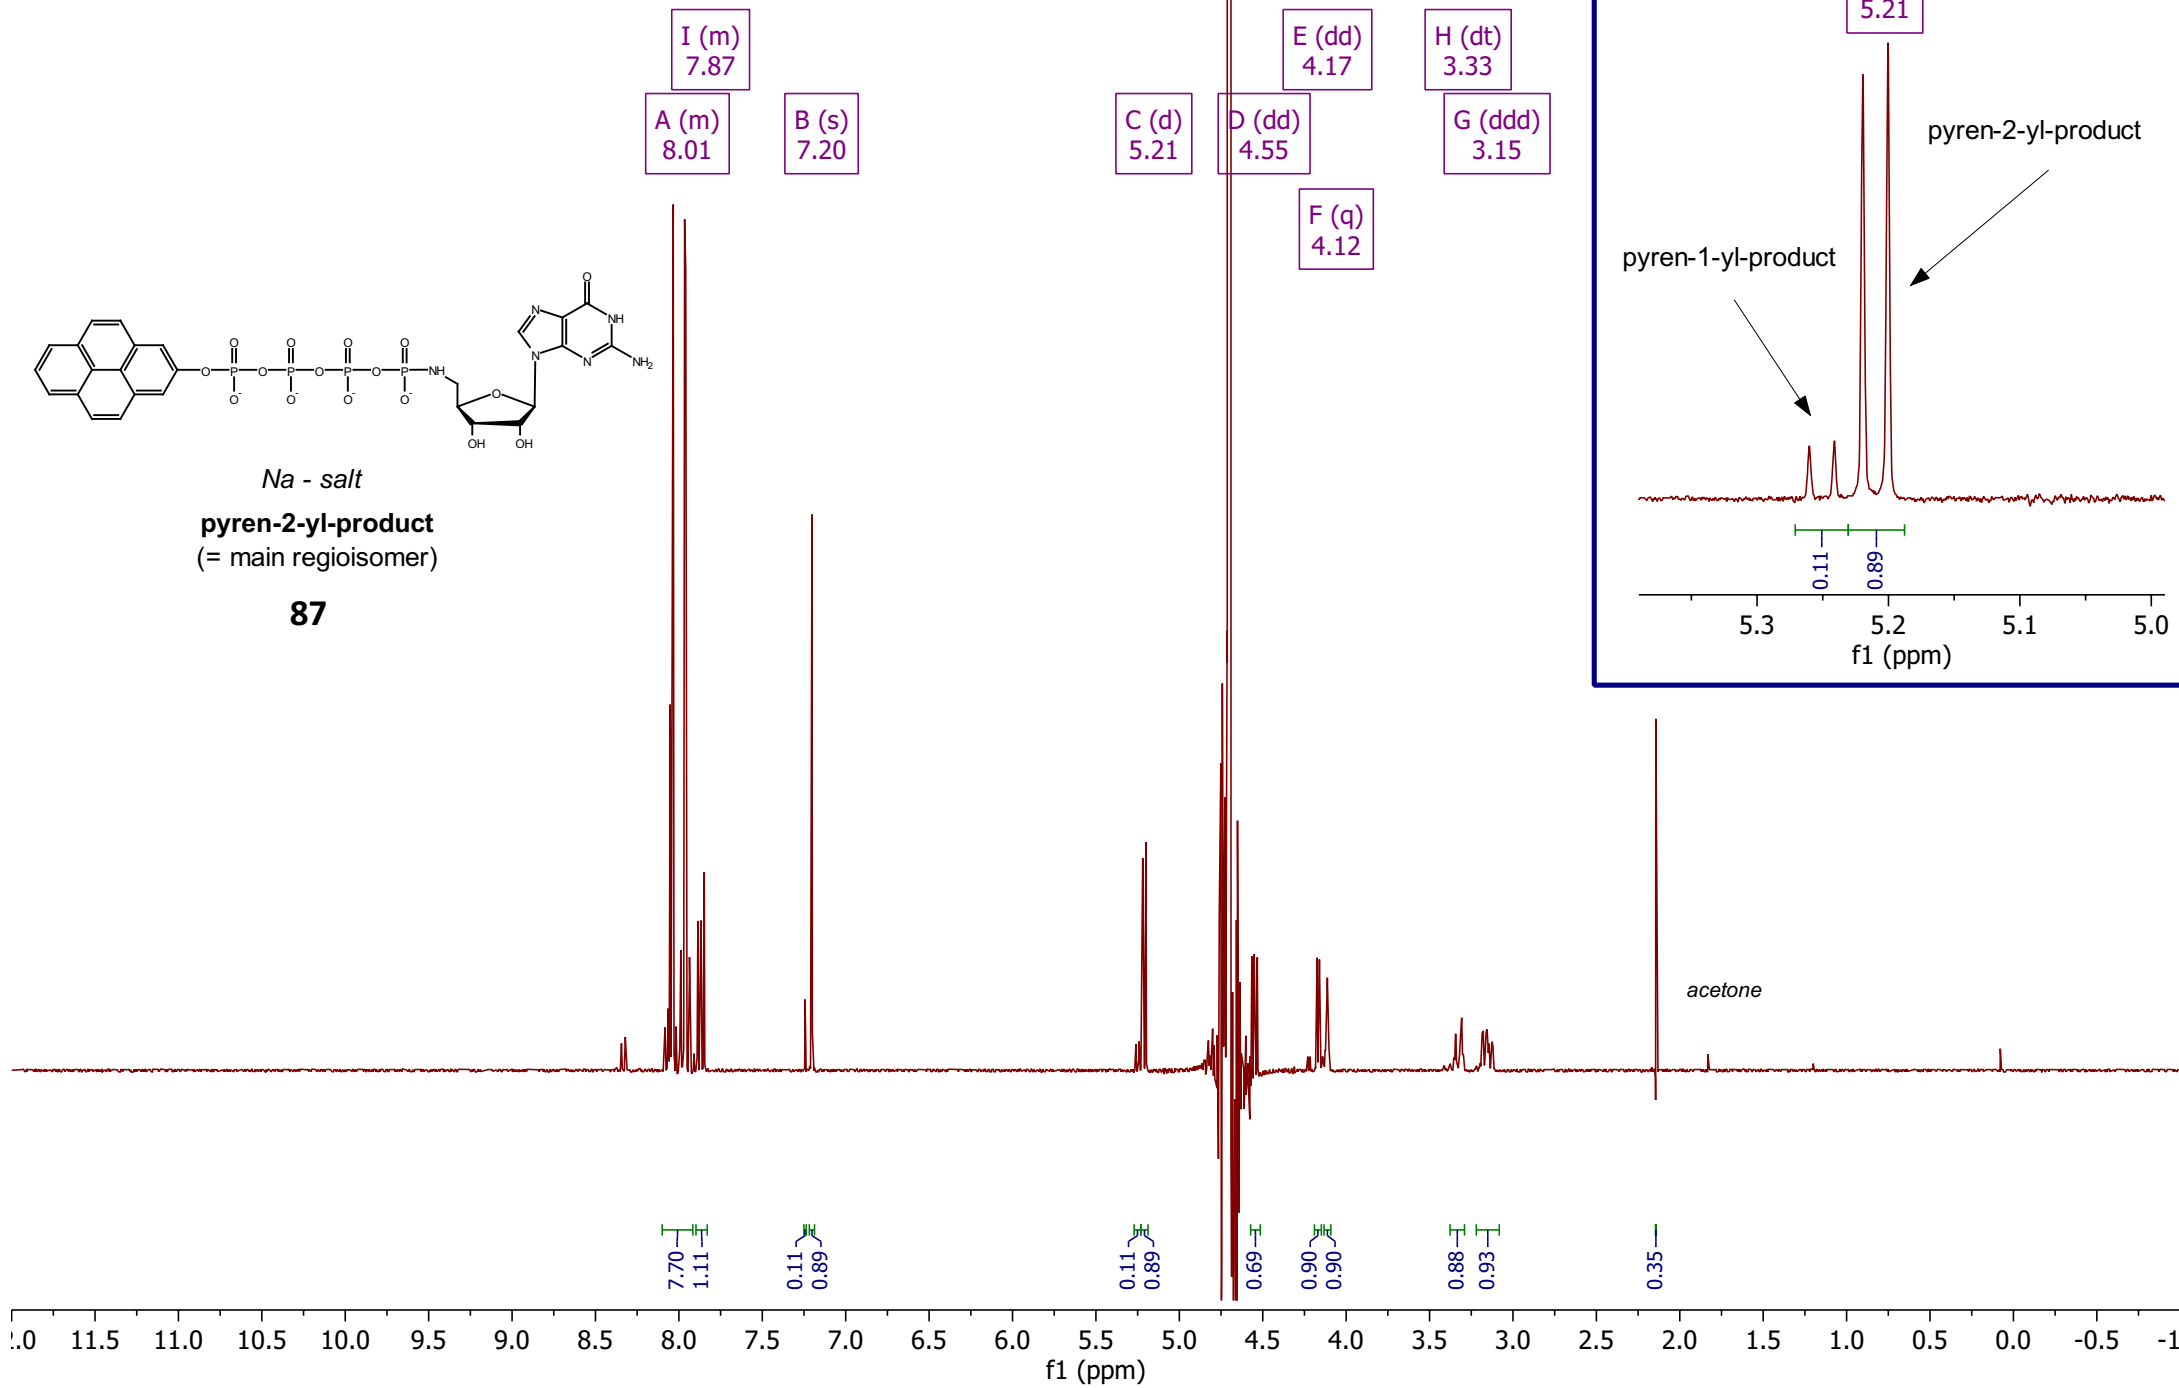

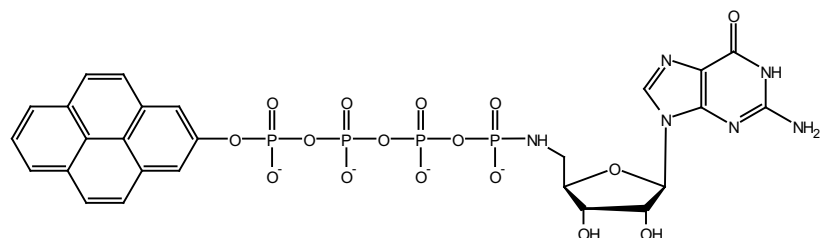

Na - salt  
pyren-2-yl-product  
(= main regioisomer)

**87**

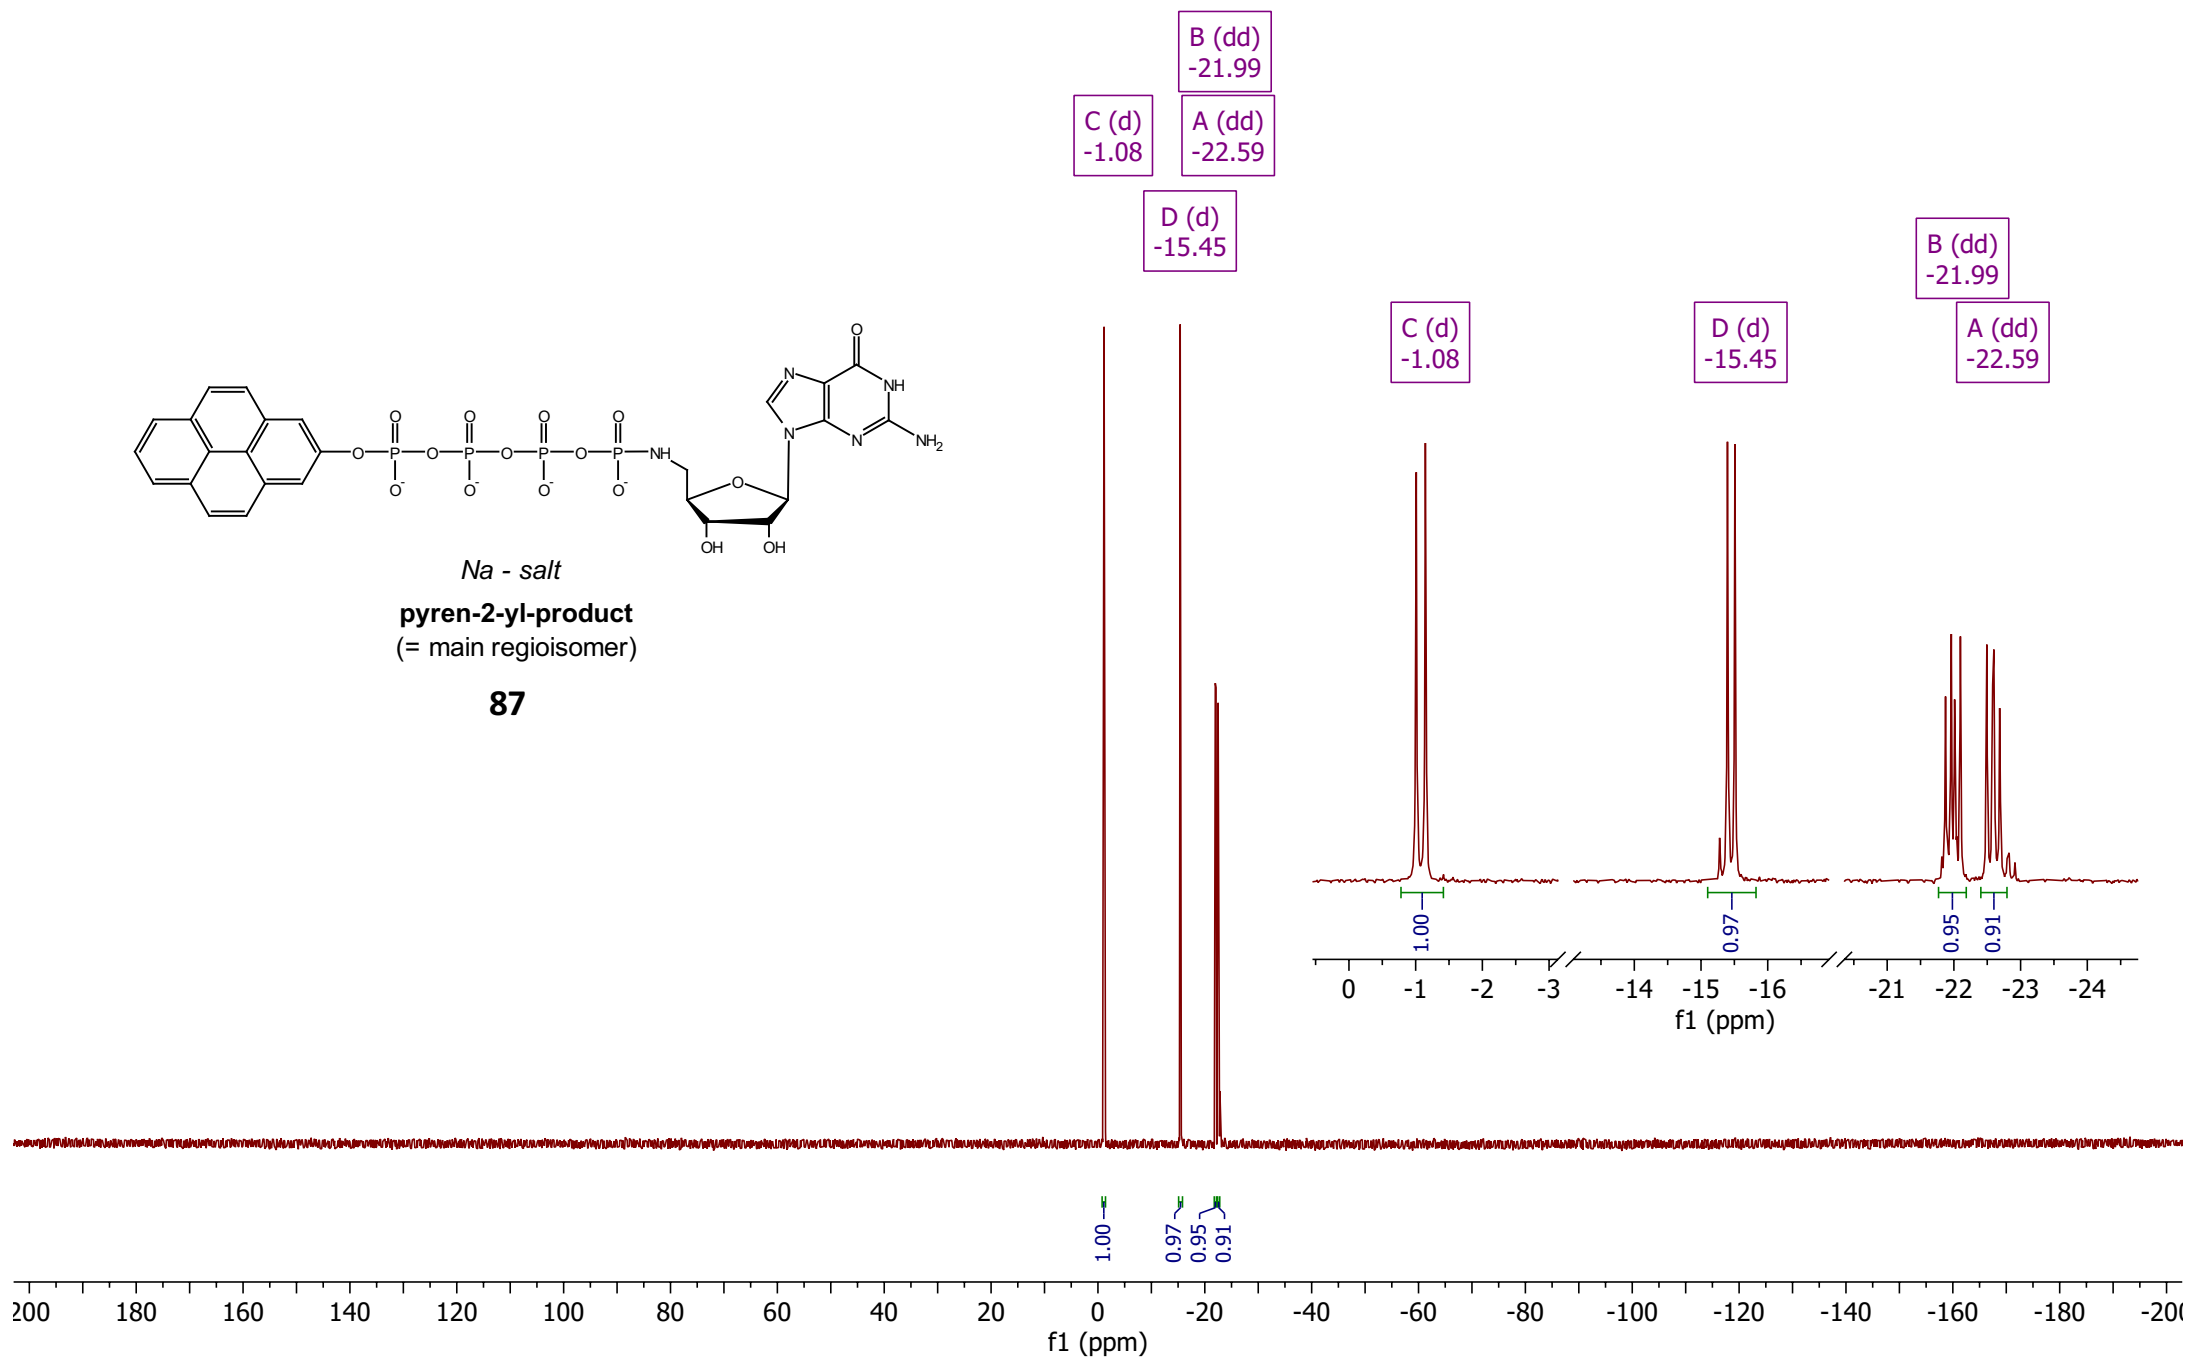

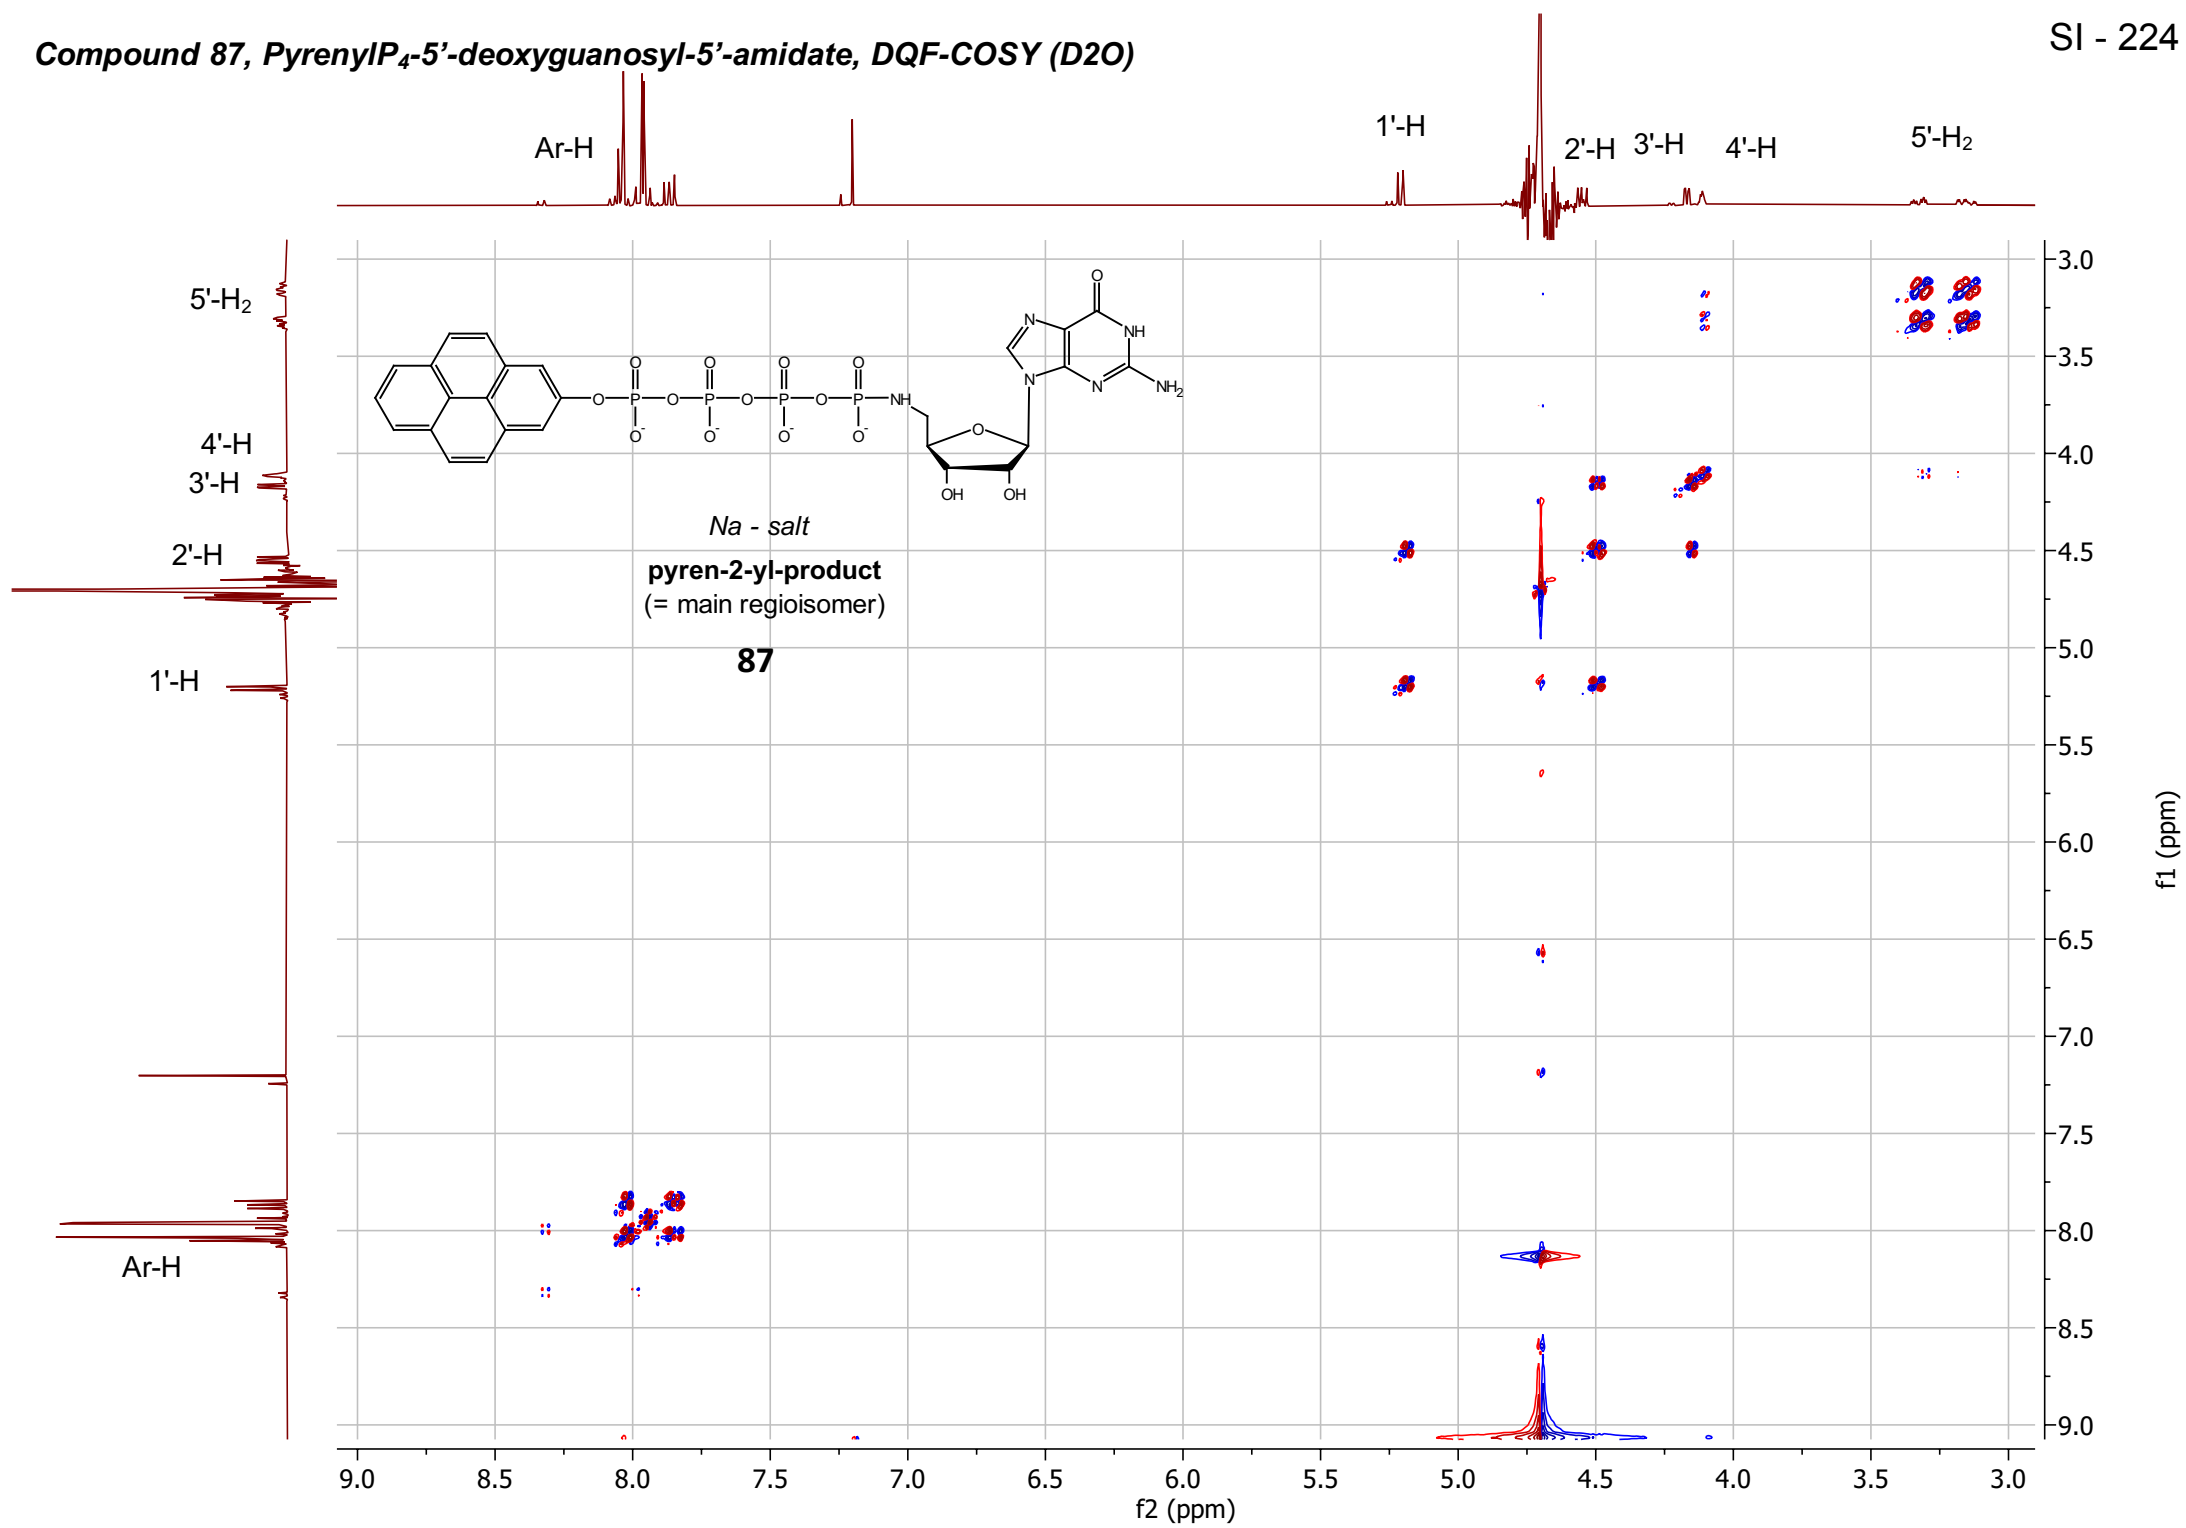

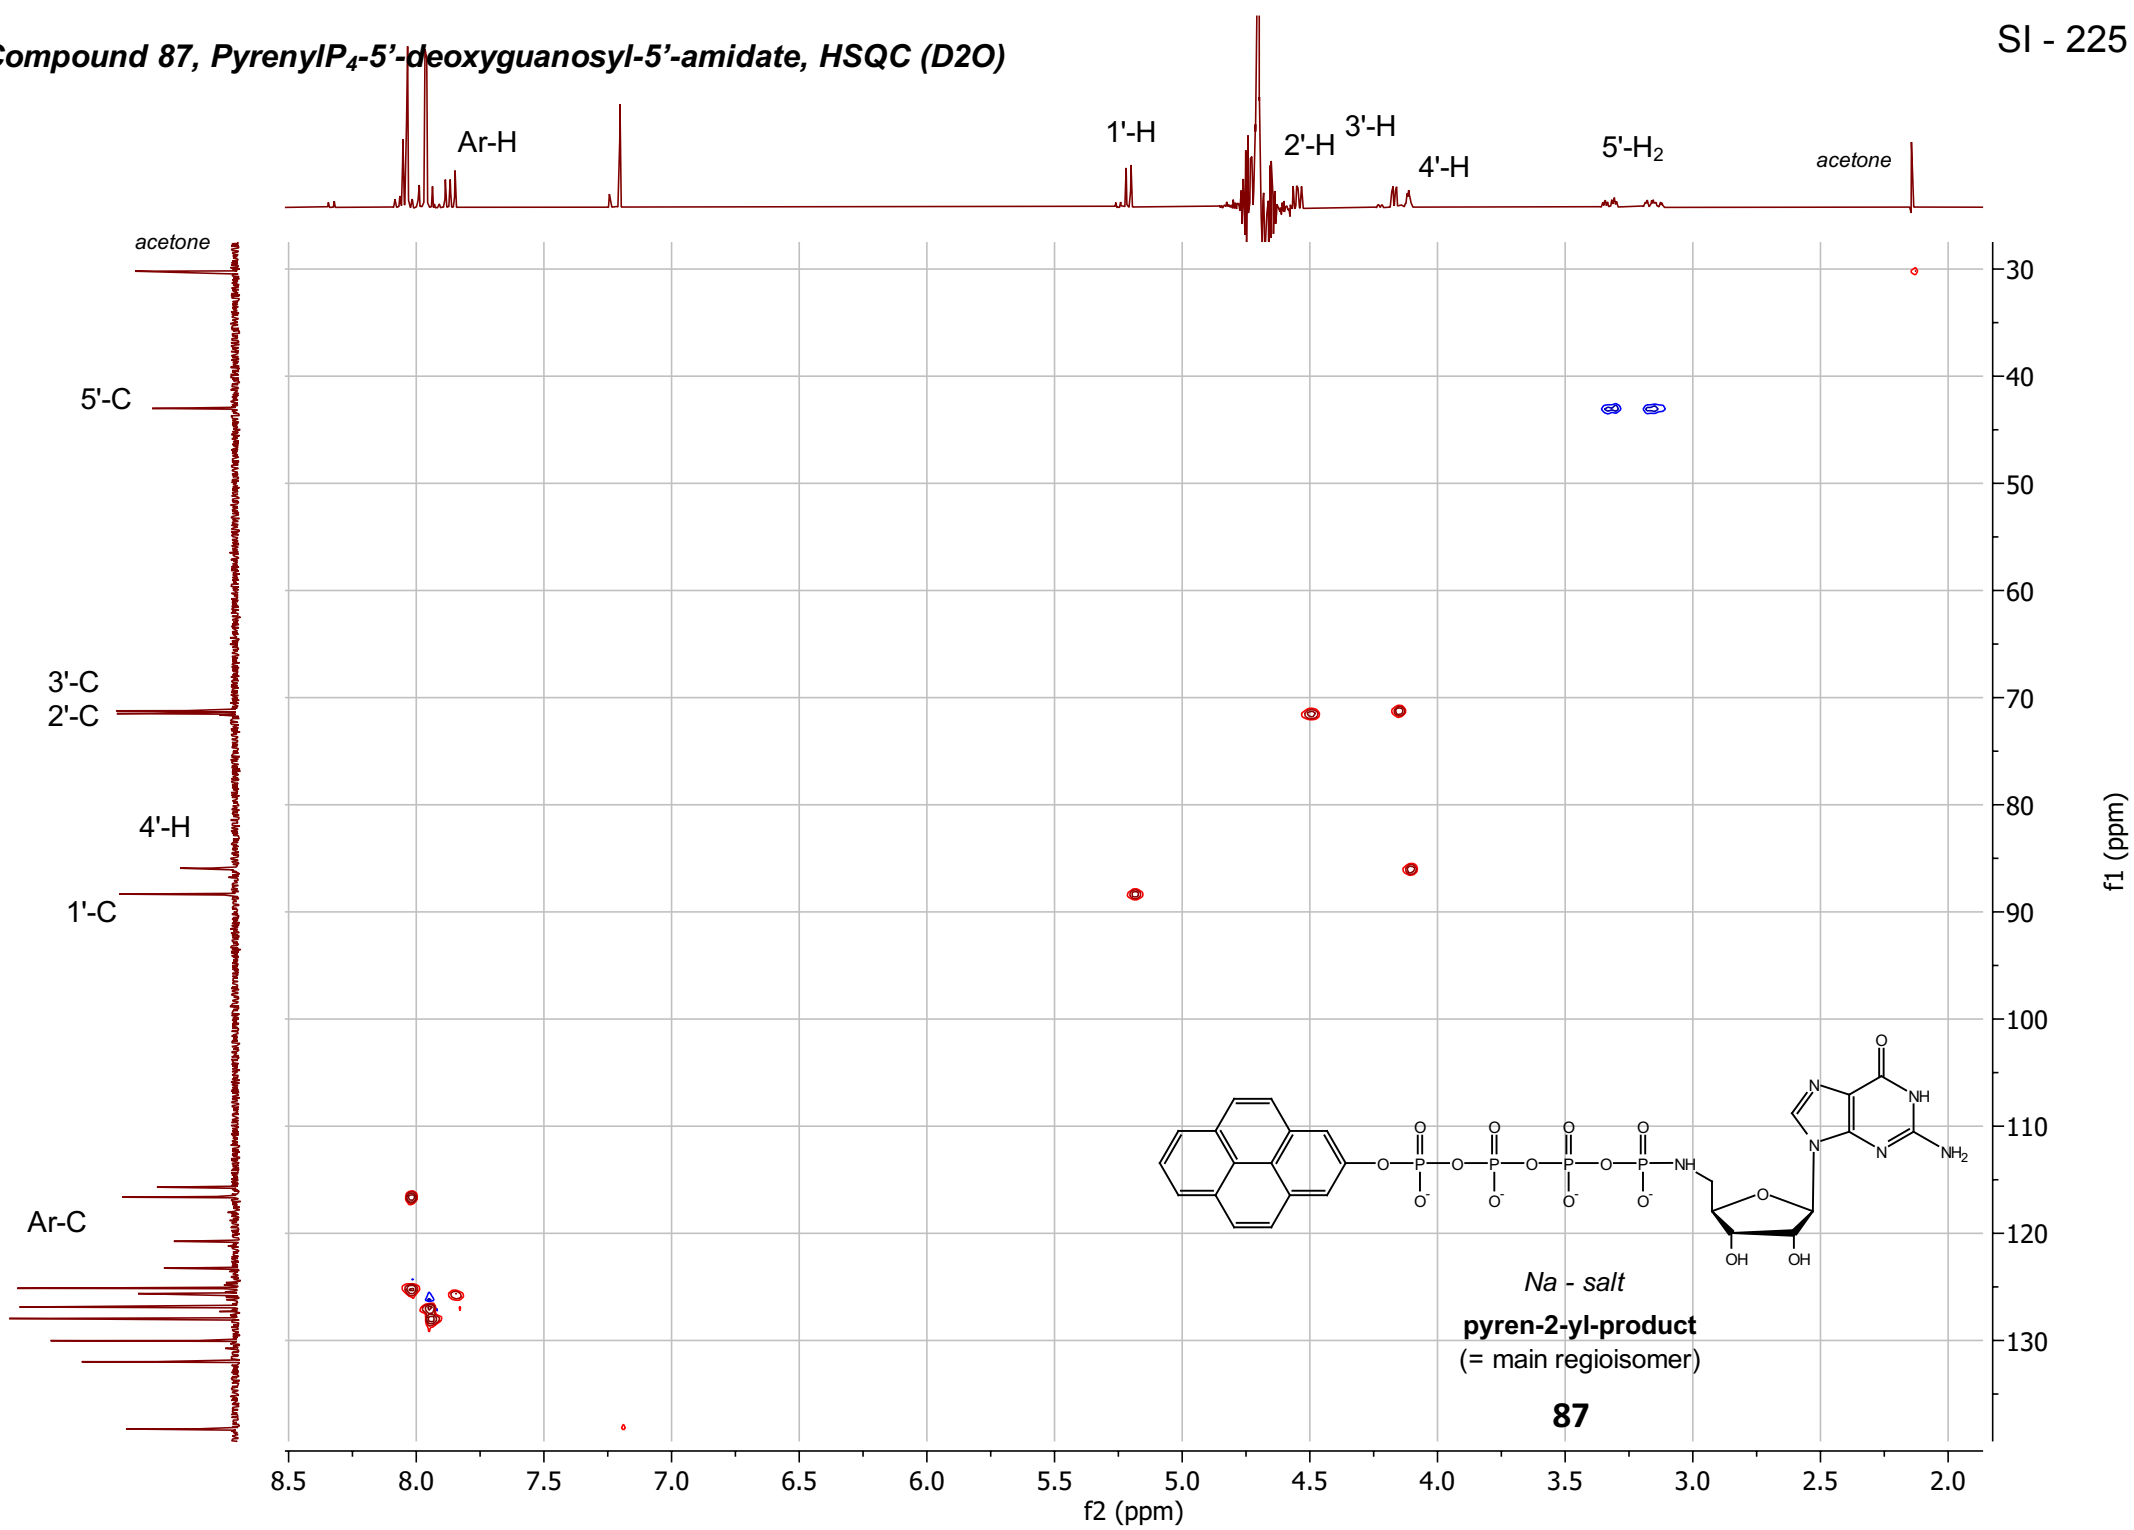

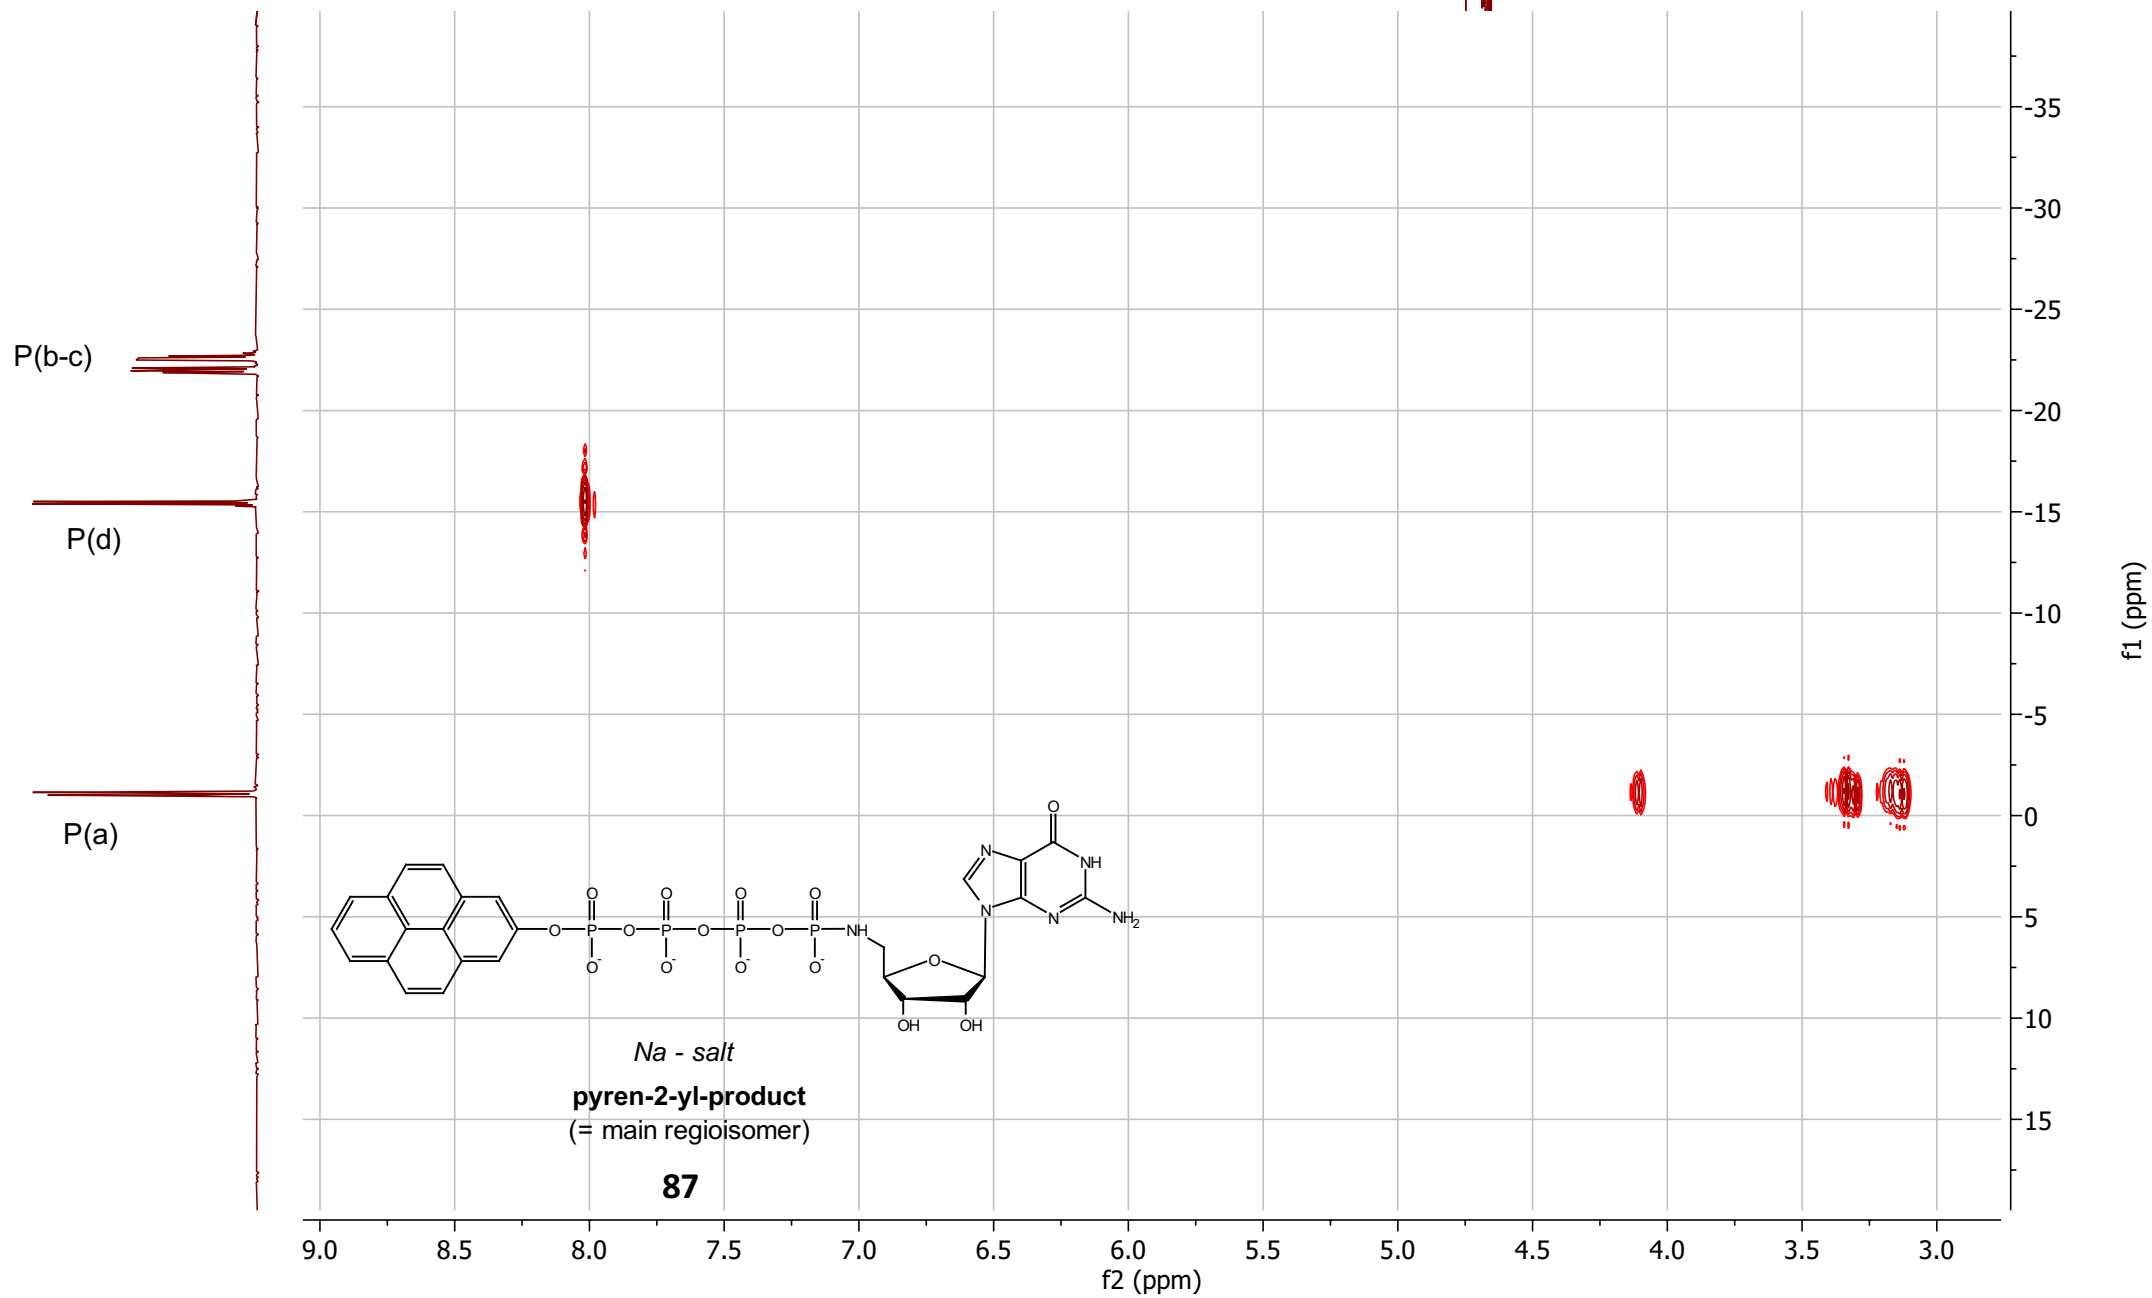

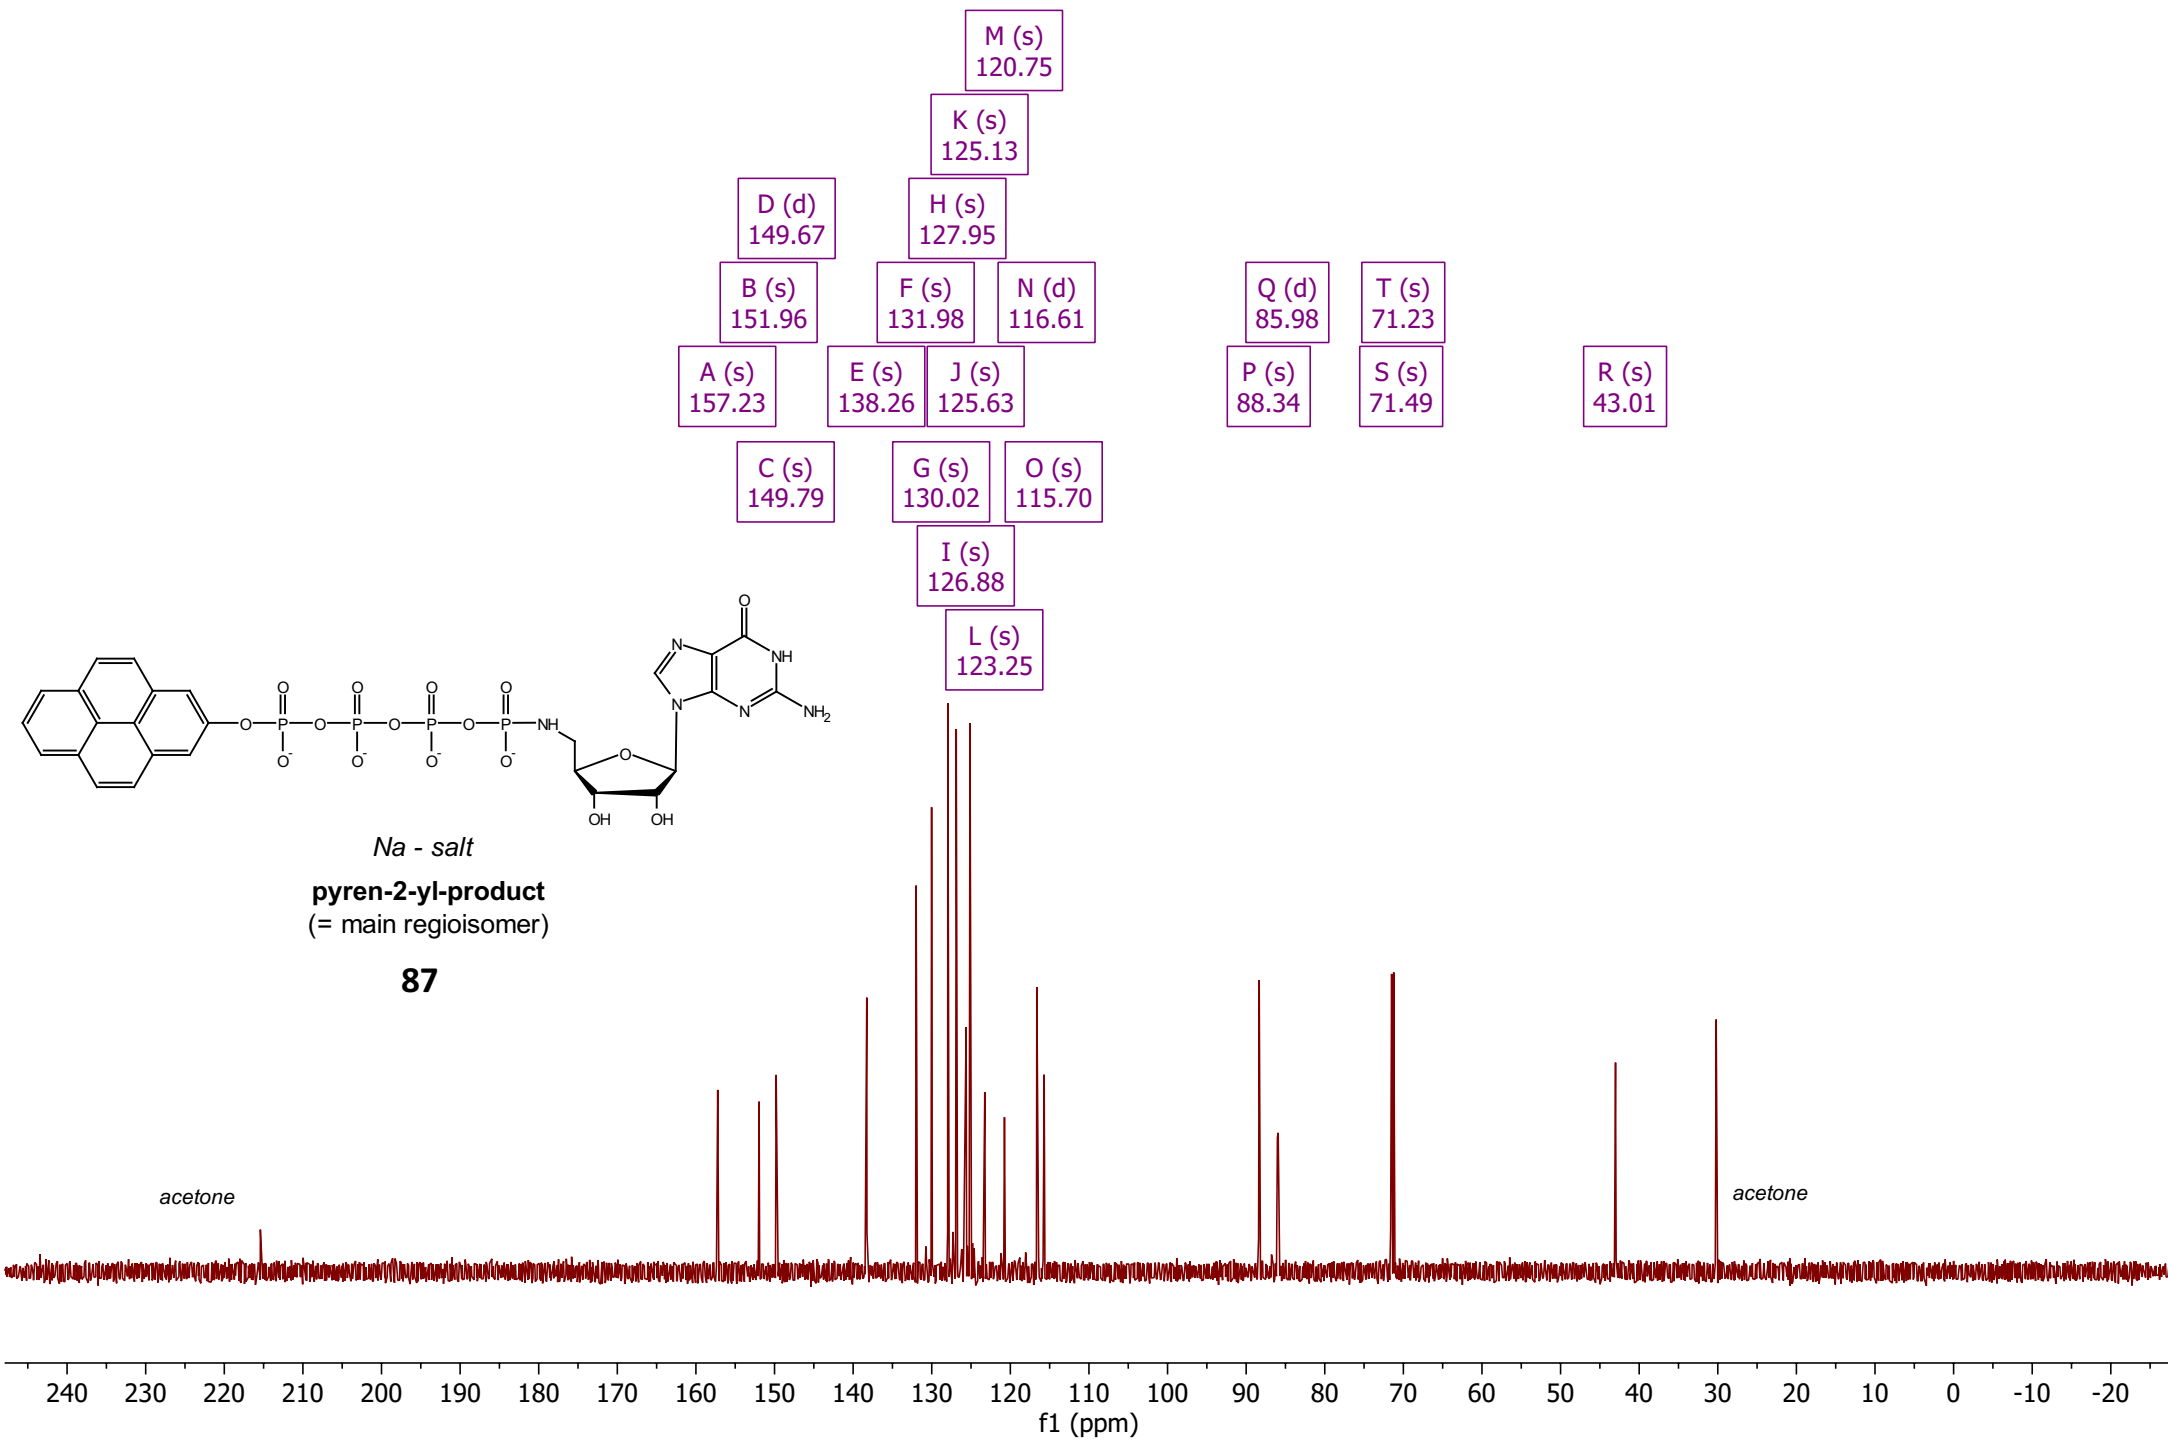

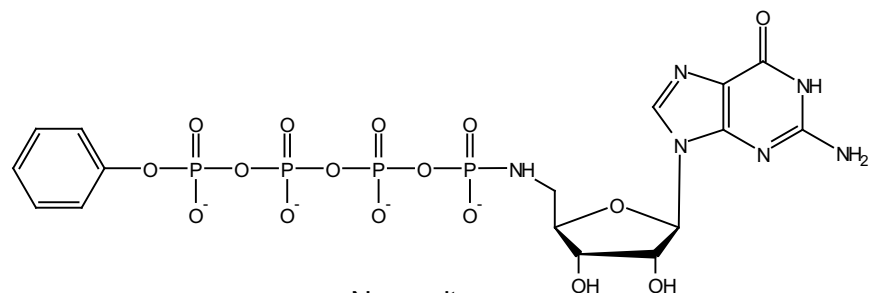

Na - salt  
**88**

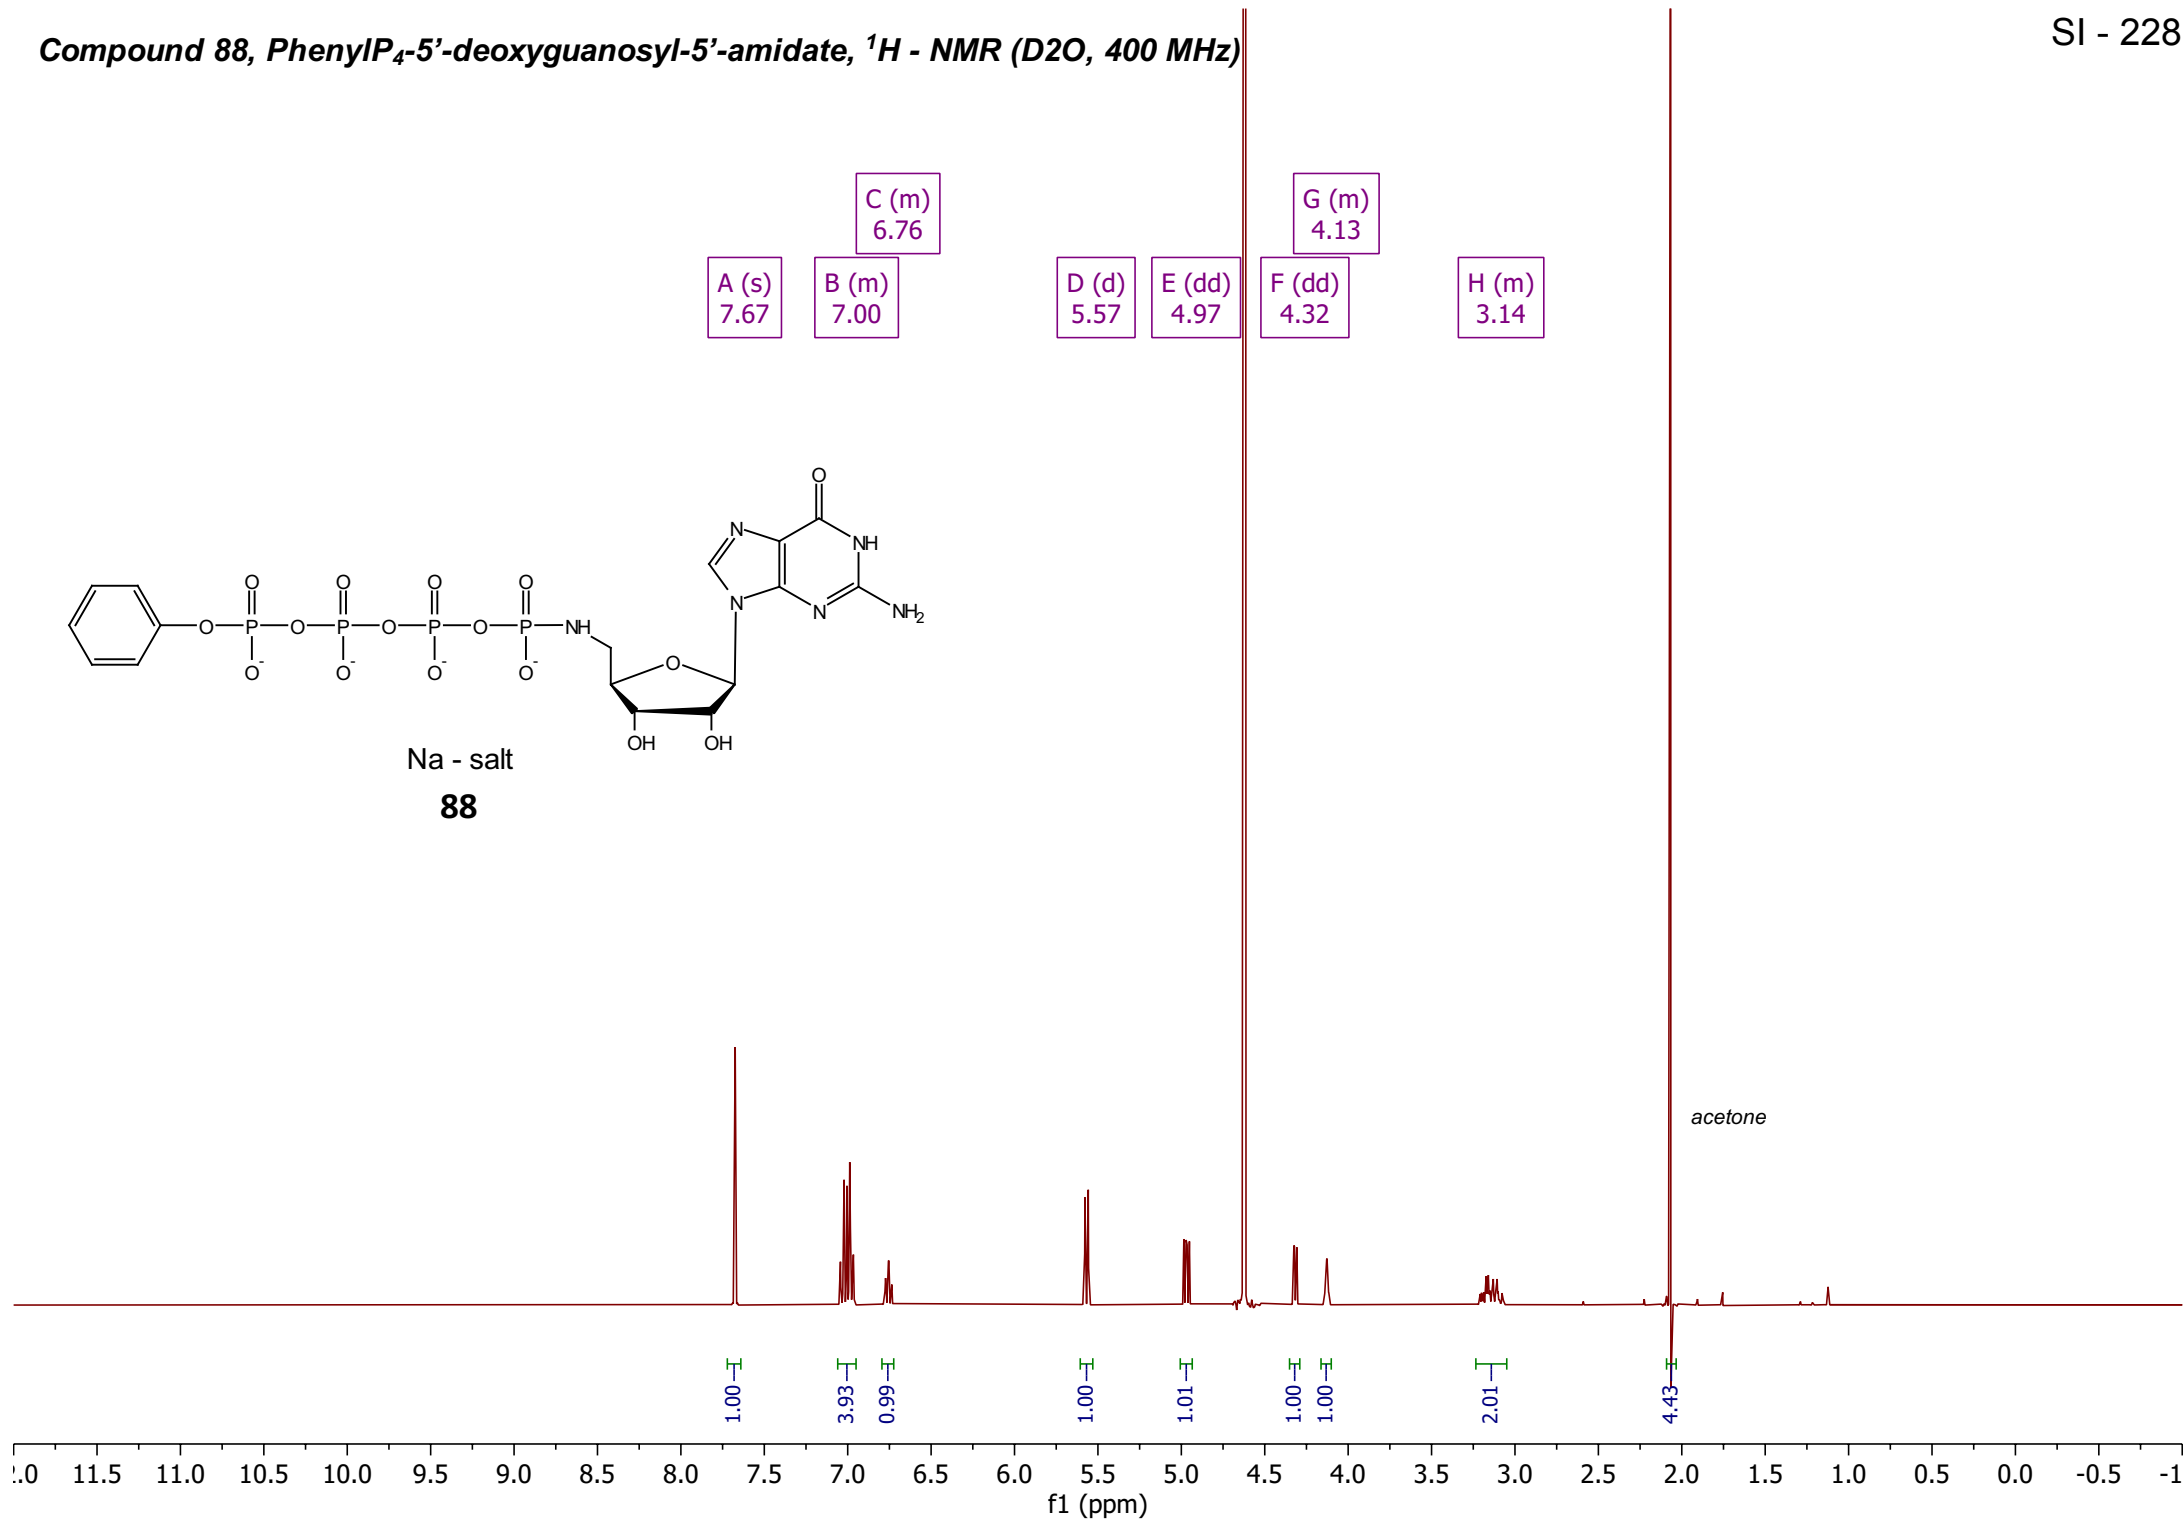

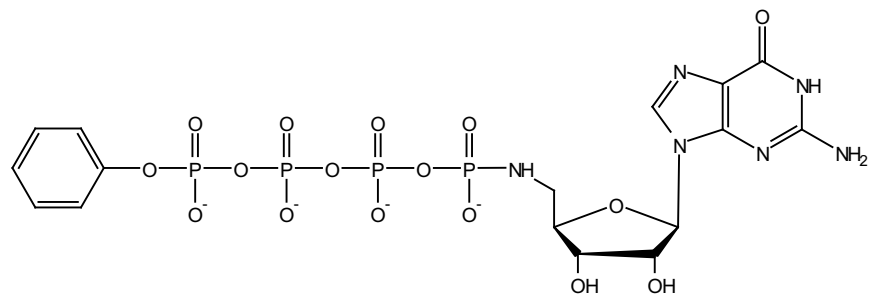

Na - salt  
**88**

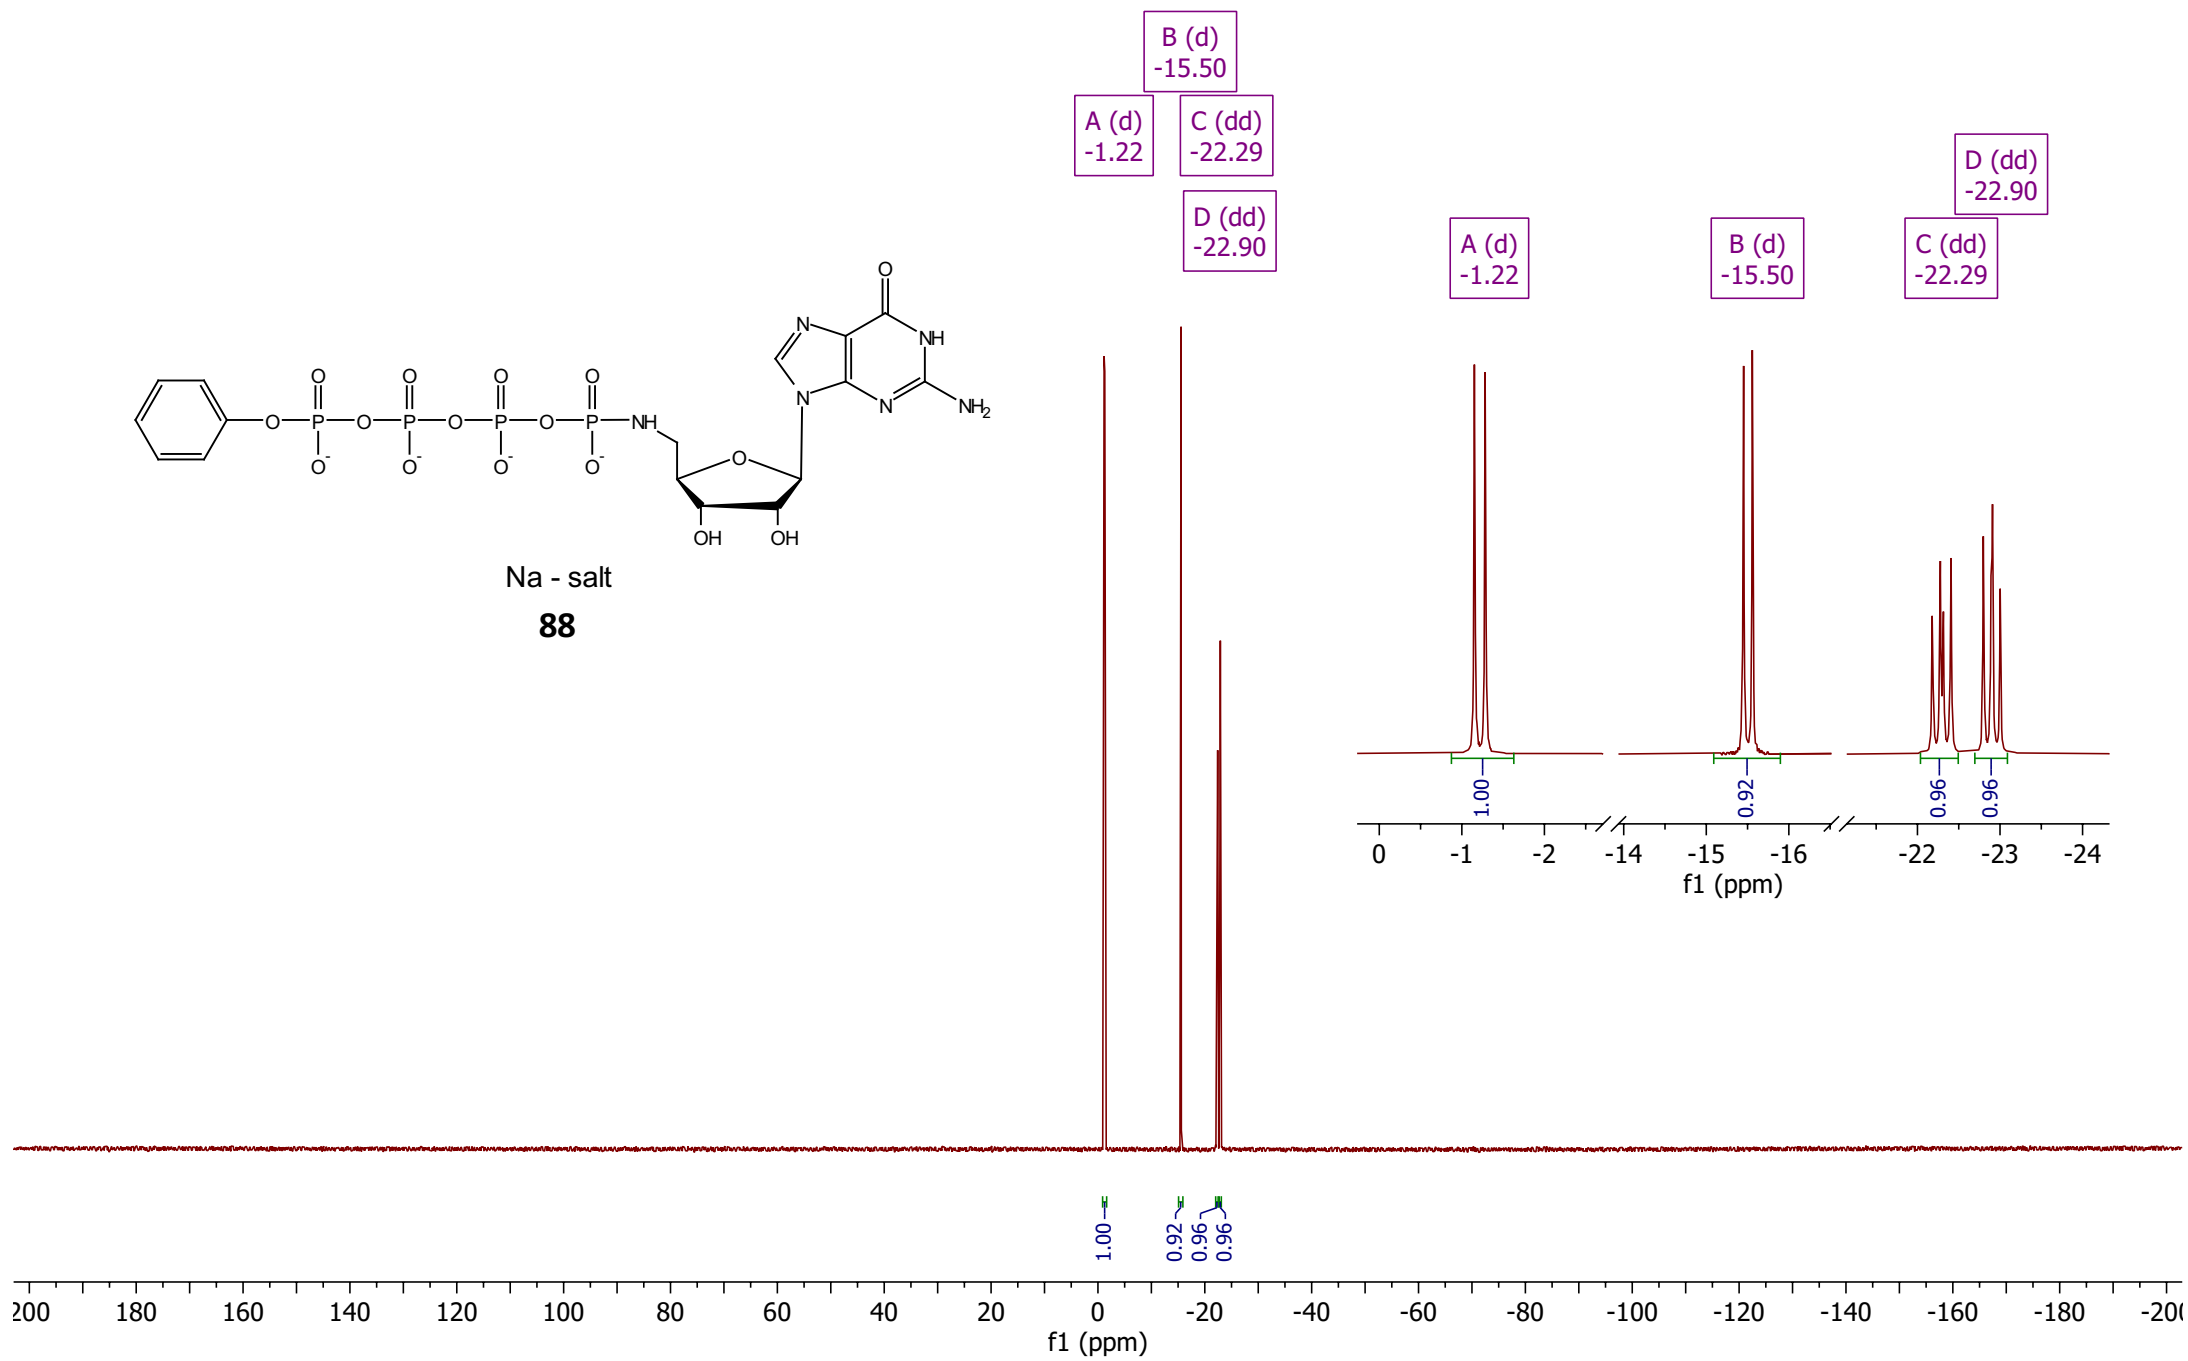



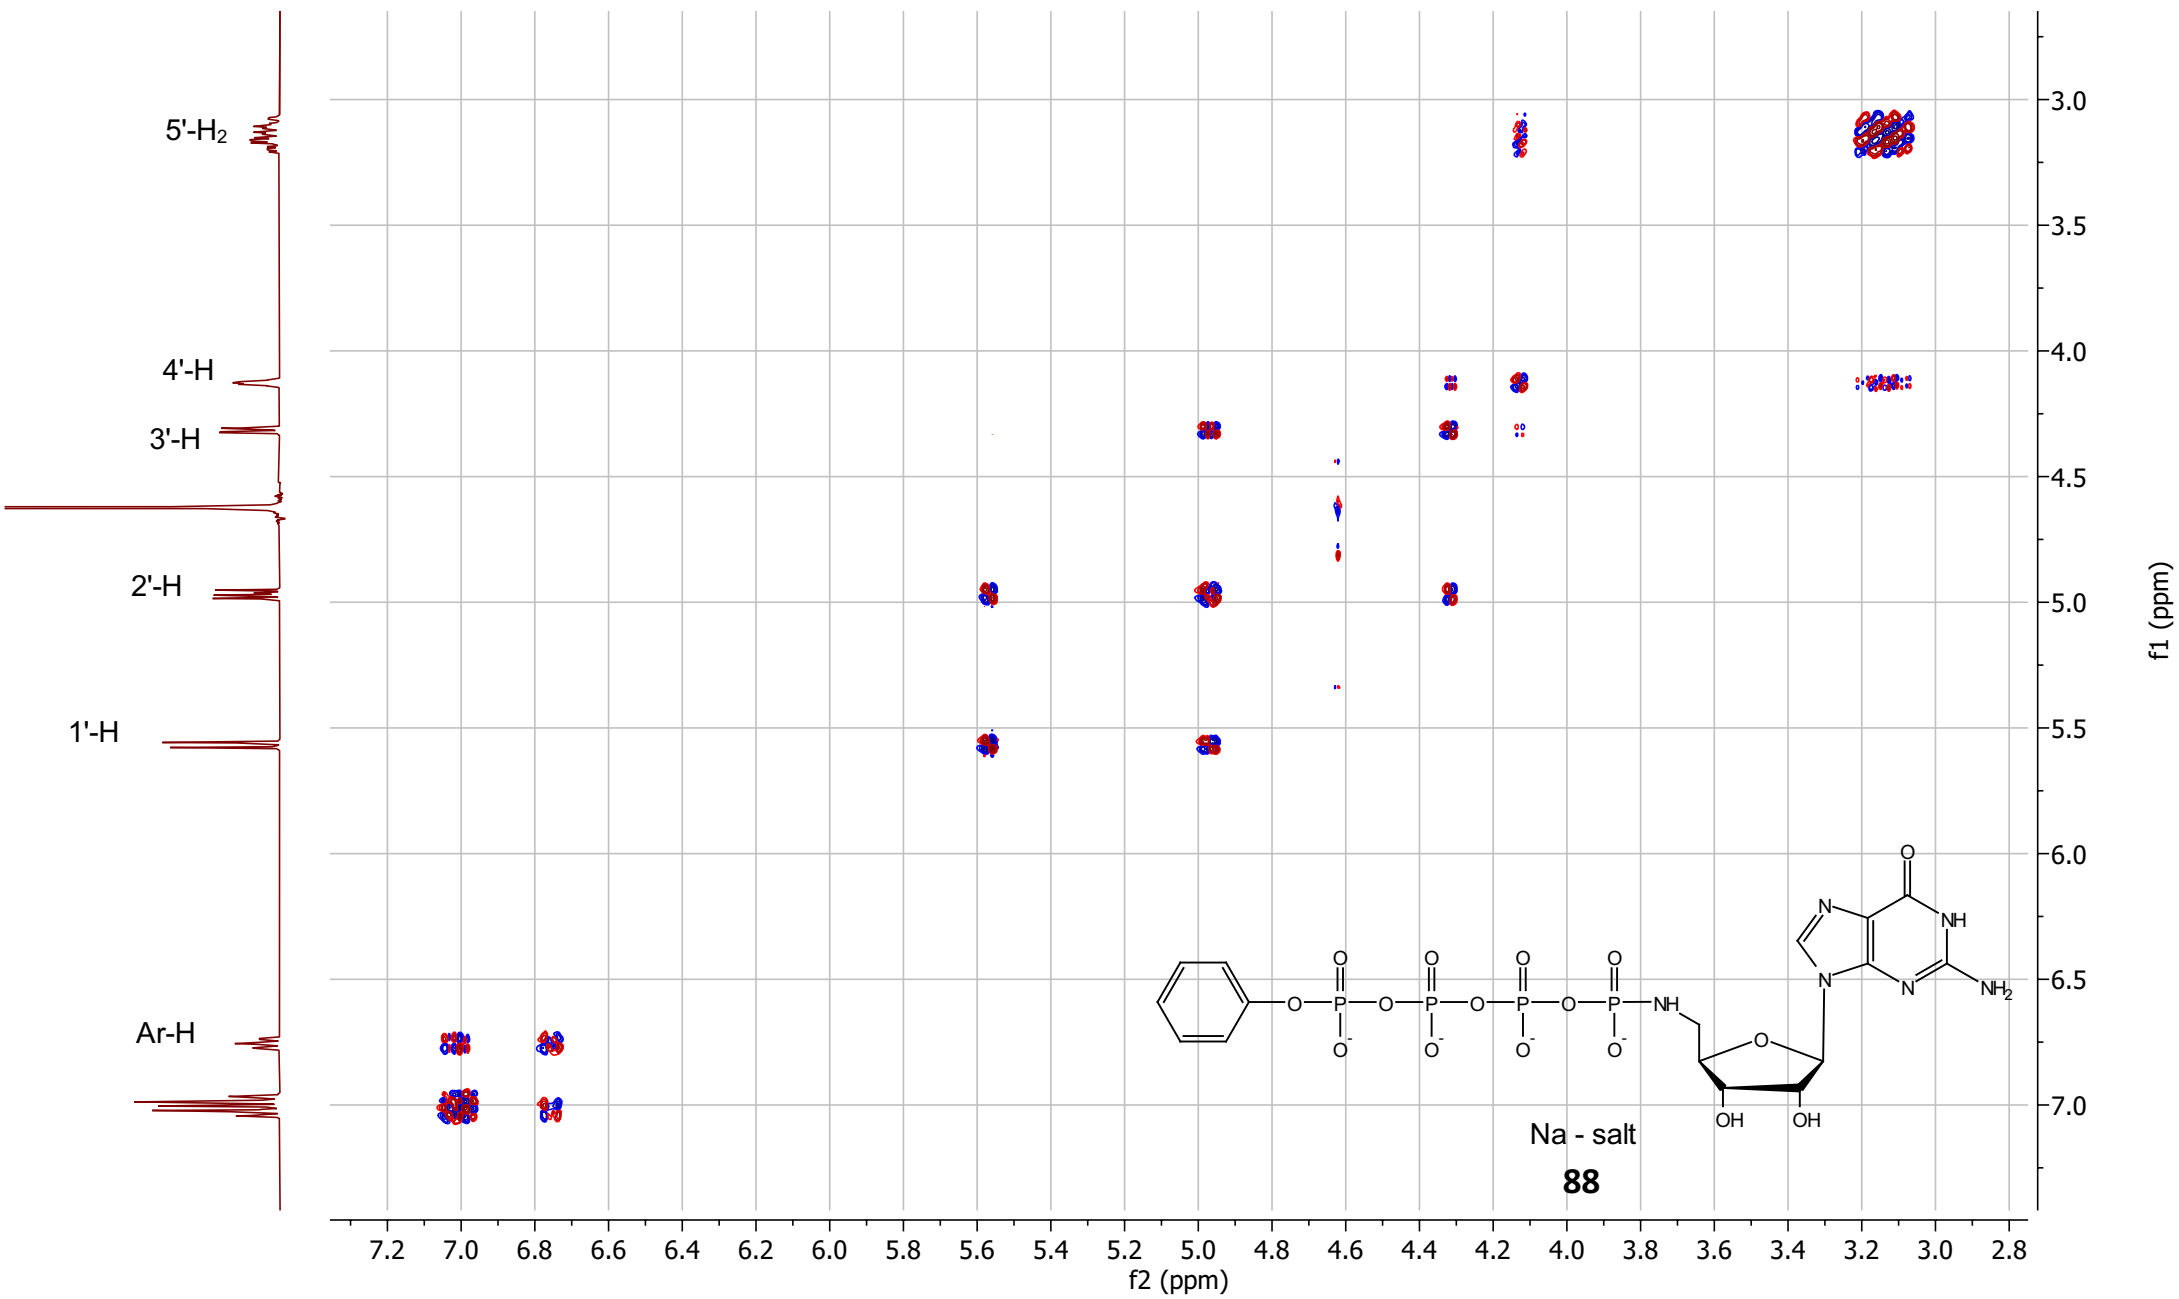

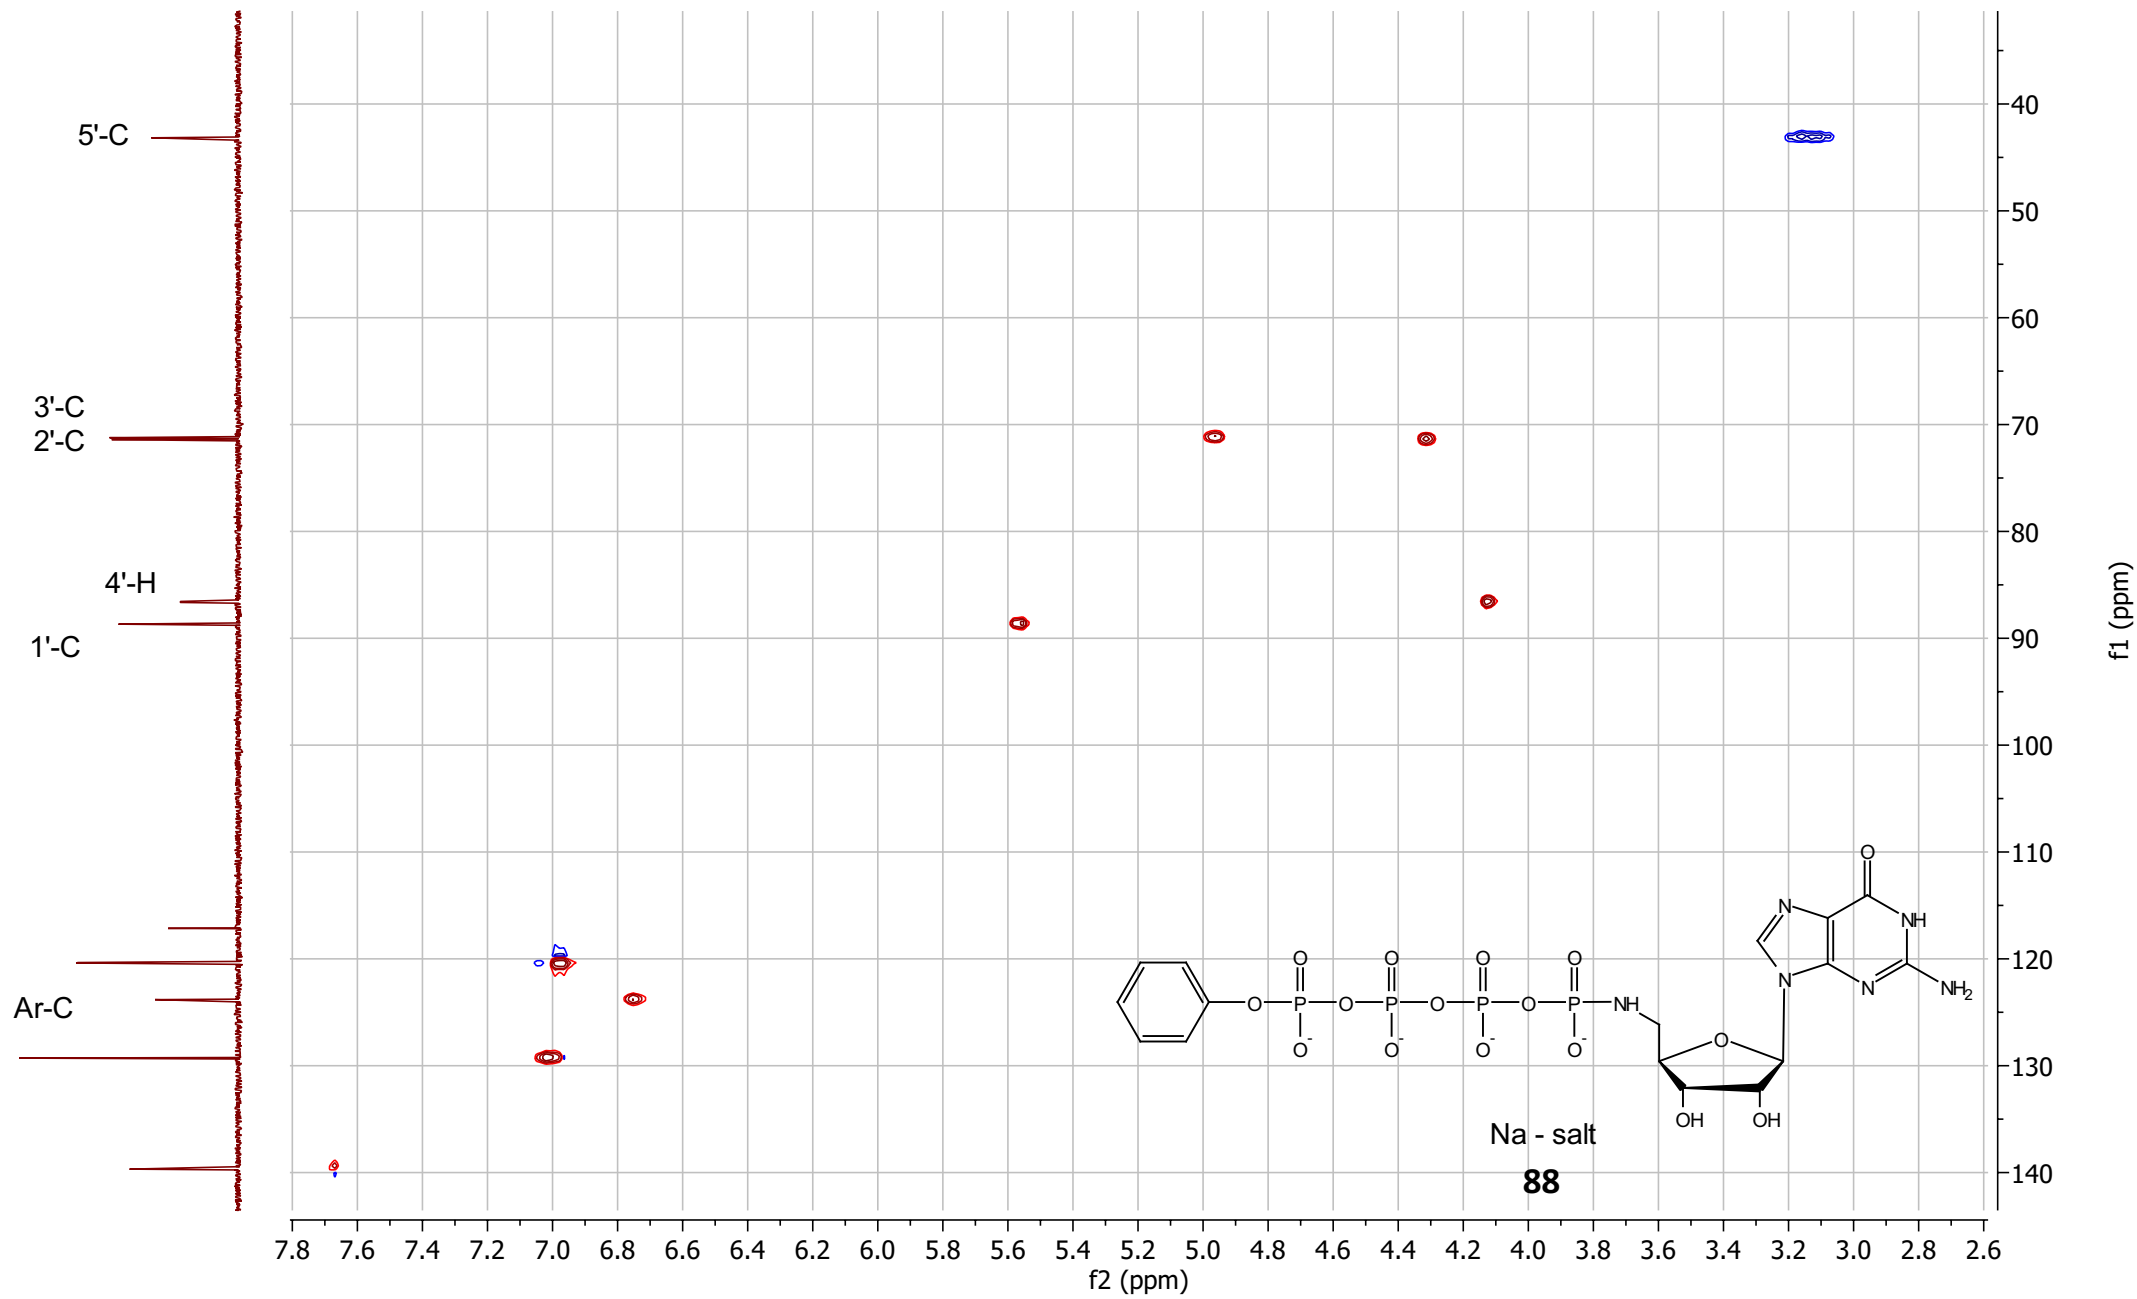

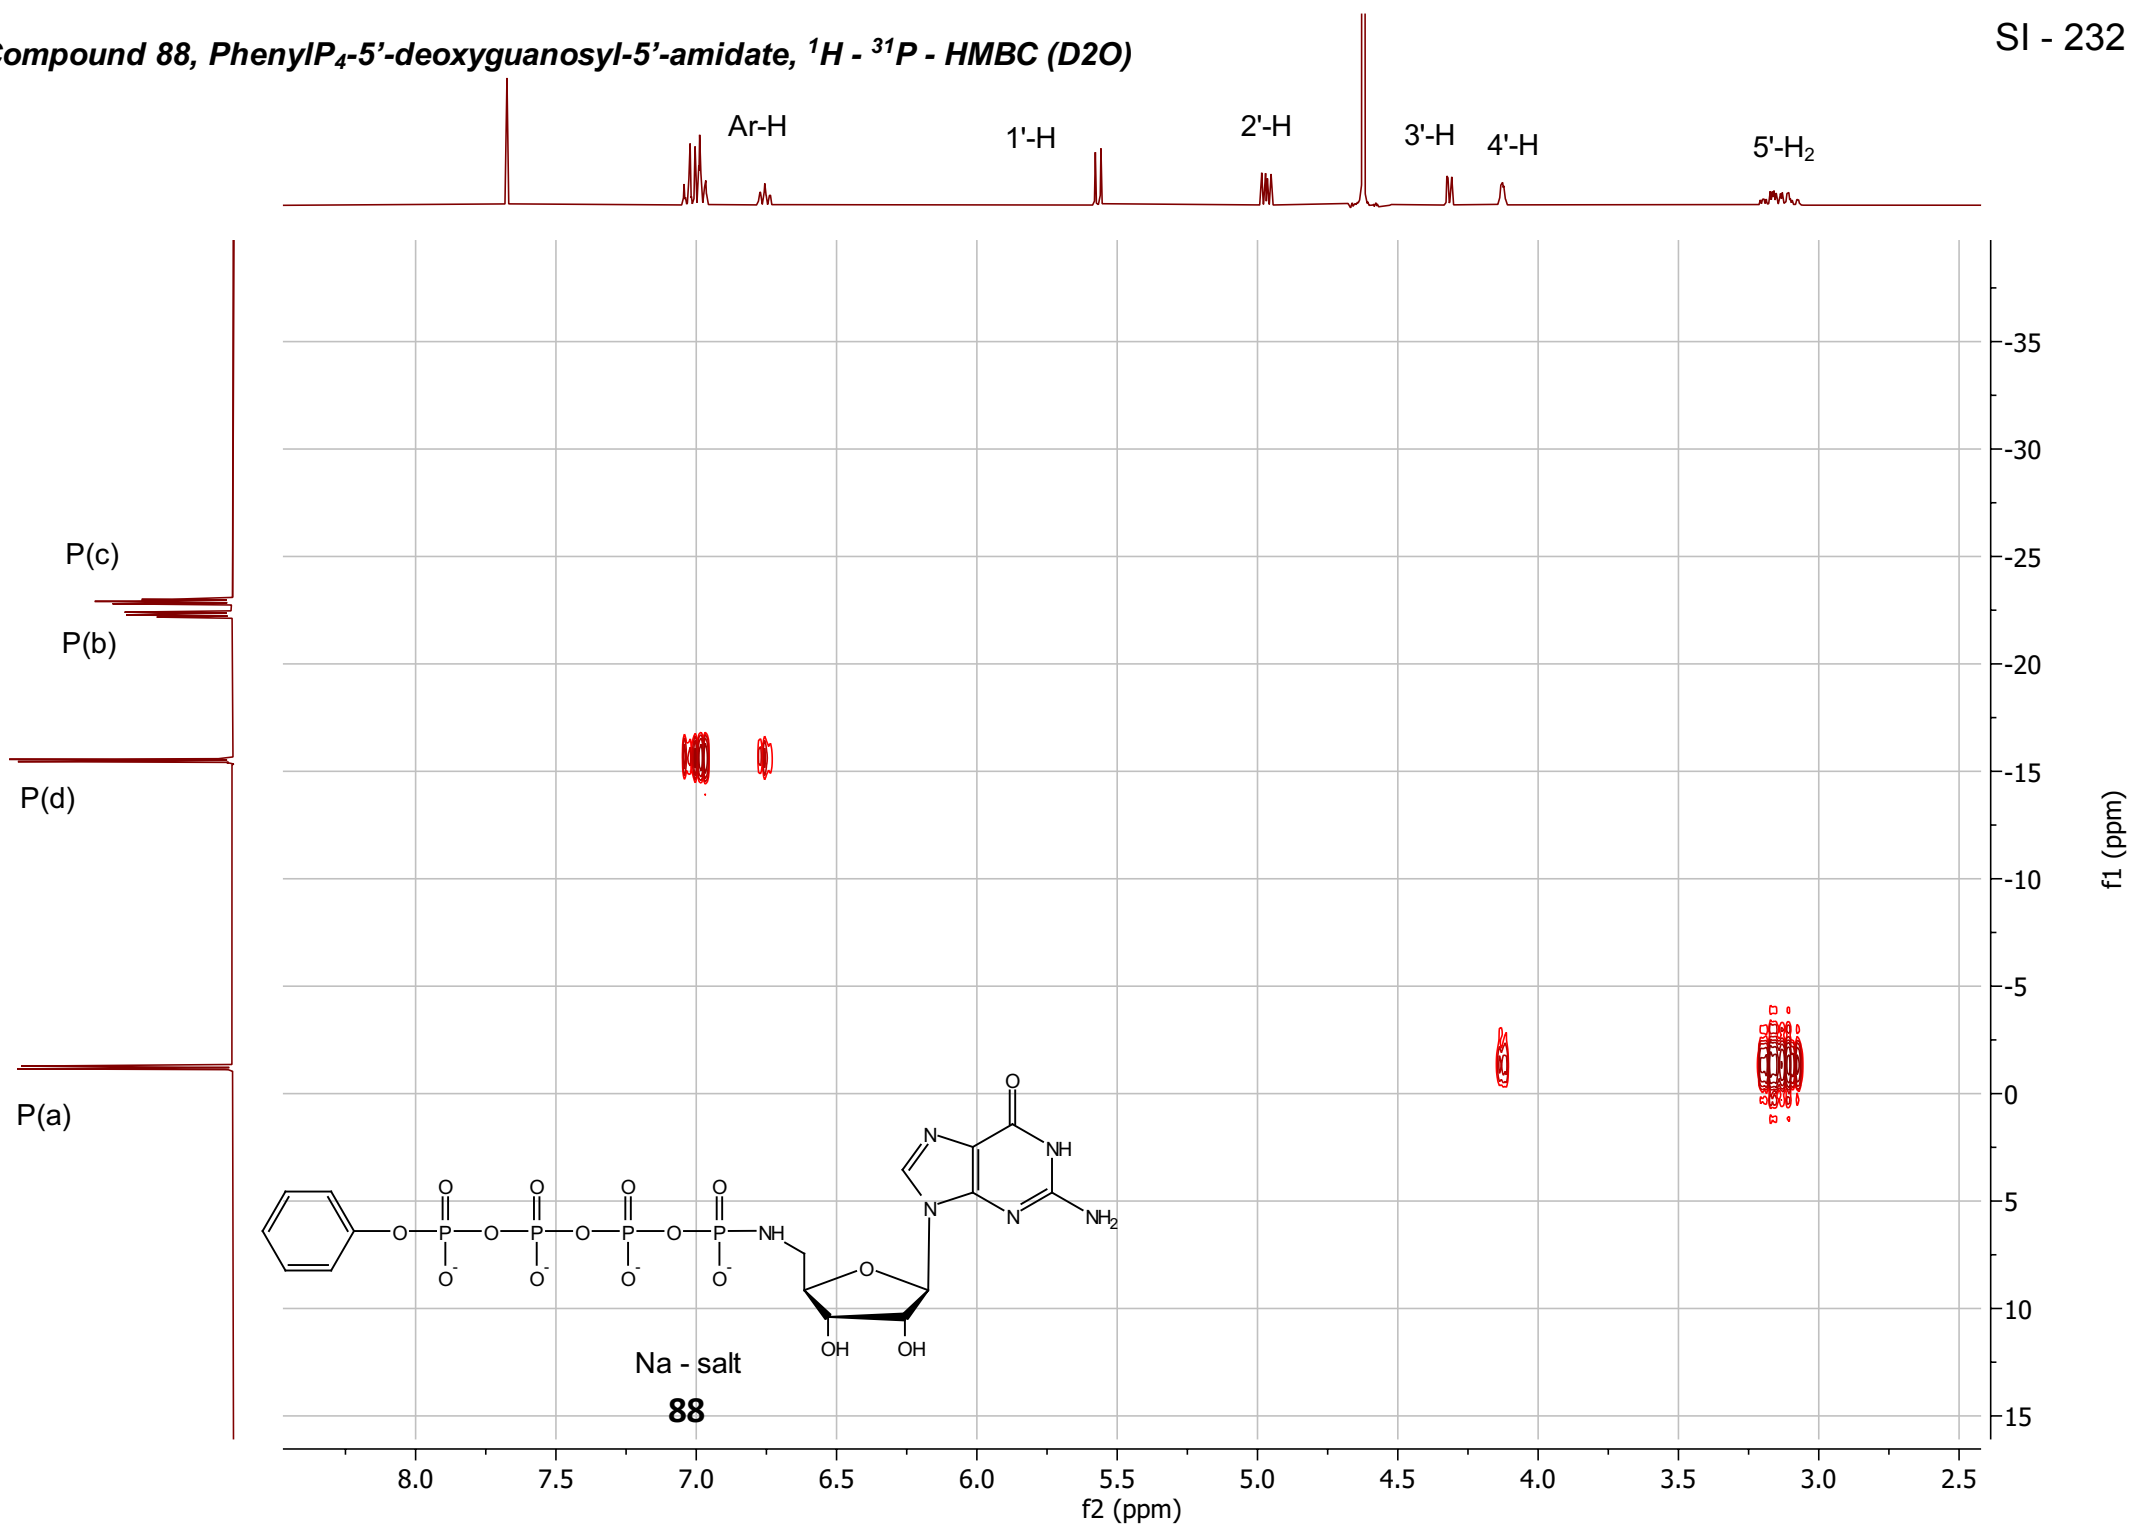

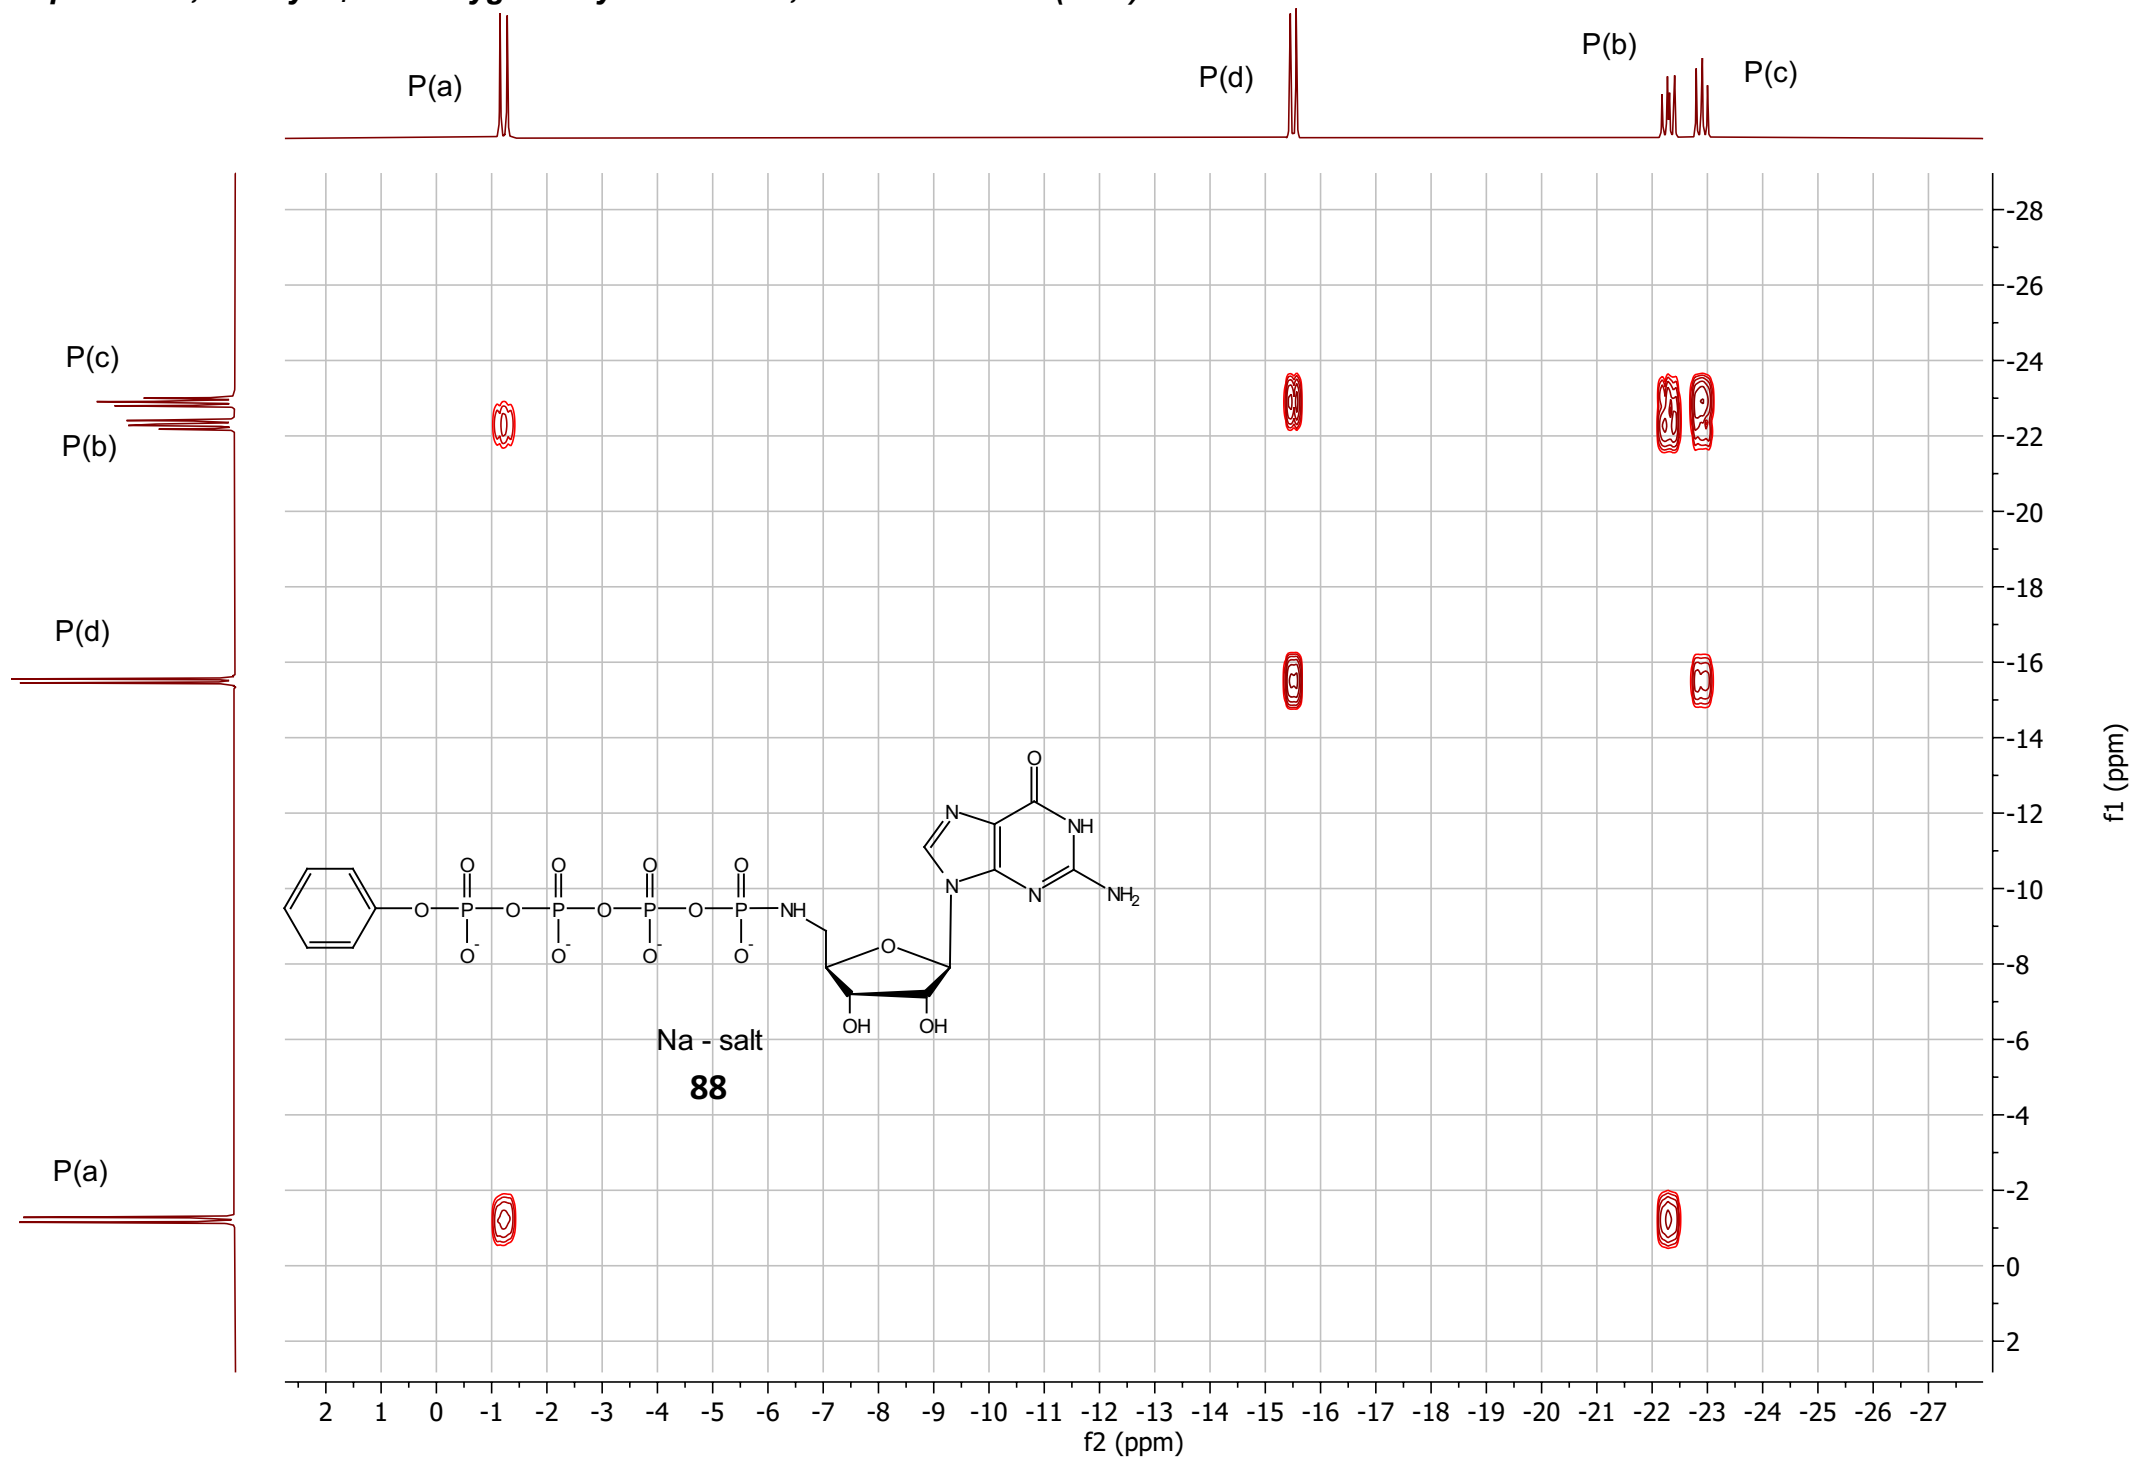

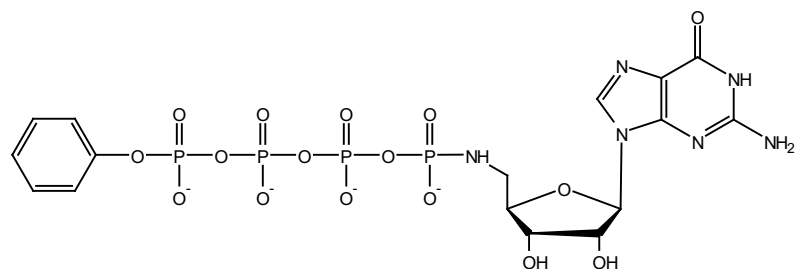

Na - salt  
**88**

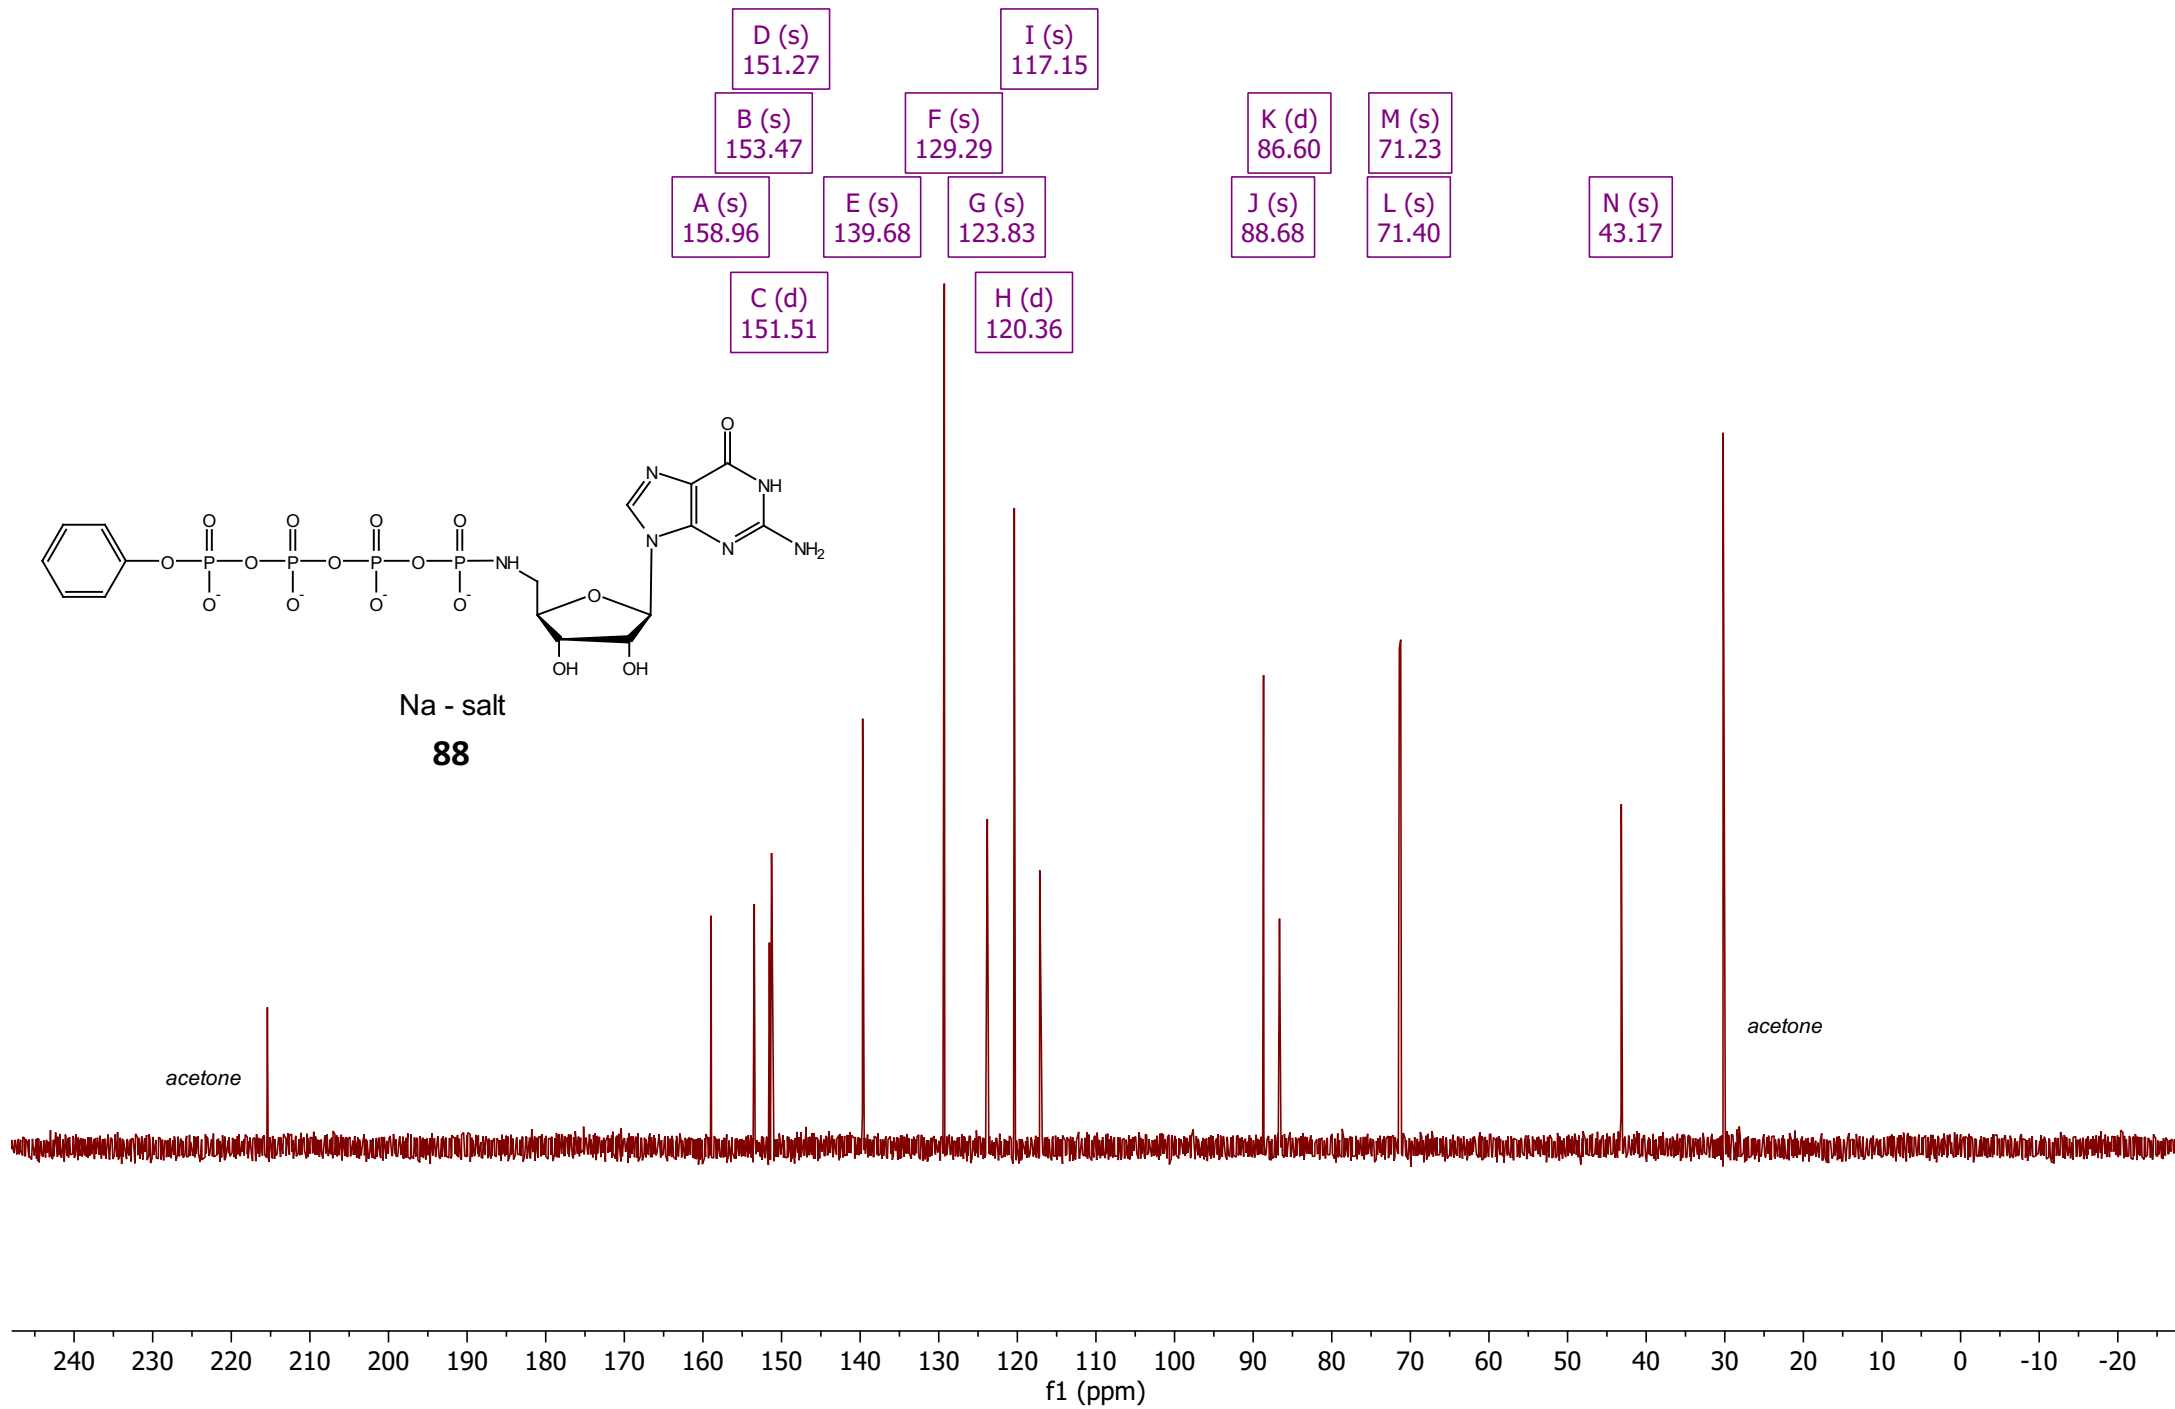

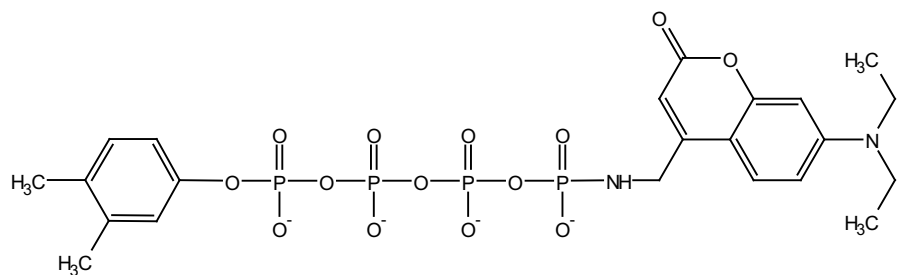

Na - salt  
**89**

- A (d) 7.34
- B (d) 6.68
- C (dd) 6.66
- D (s) 6.61
- E (d) 6.48
- F (d) 6.05
- G (d) 4.11
- H (q) 3.37
- I (s) 1.85
- J (s) 1.82
- K (t) 1.12

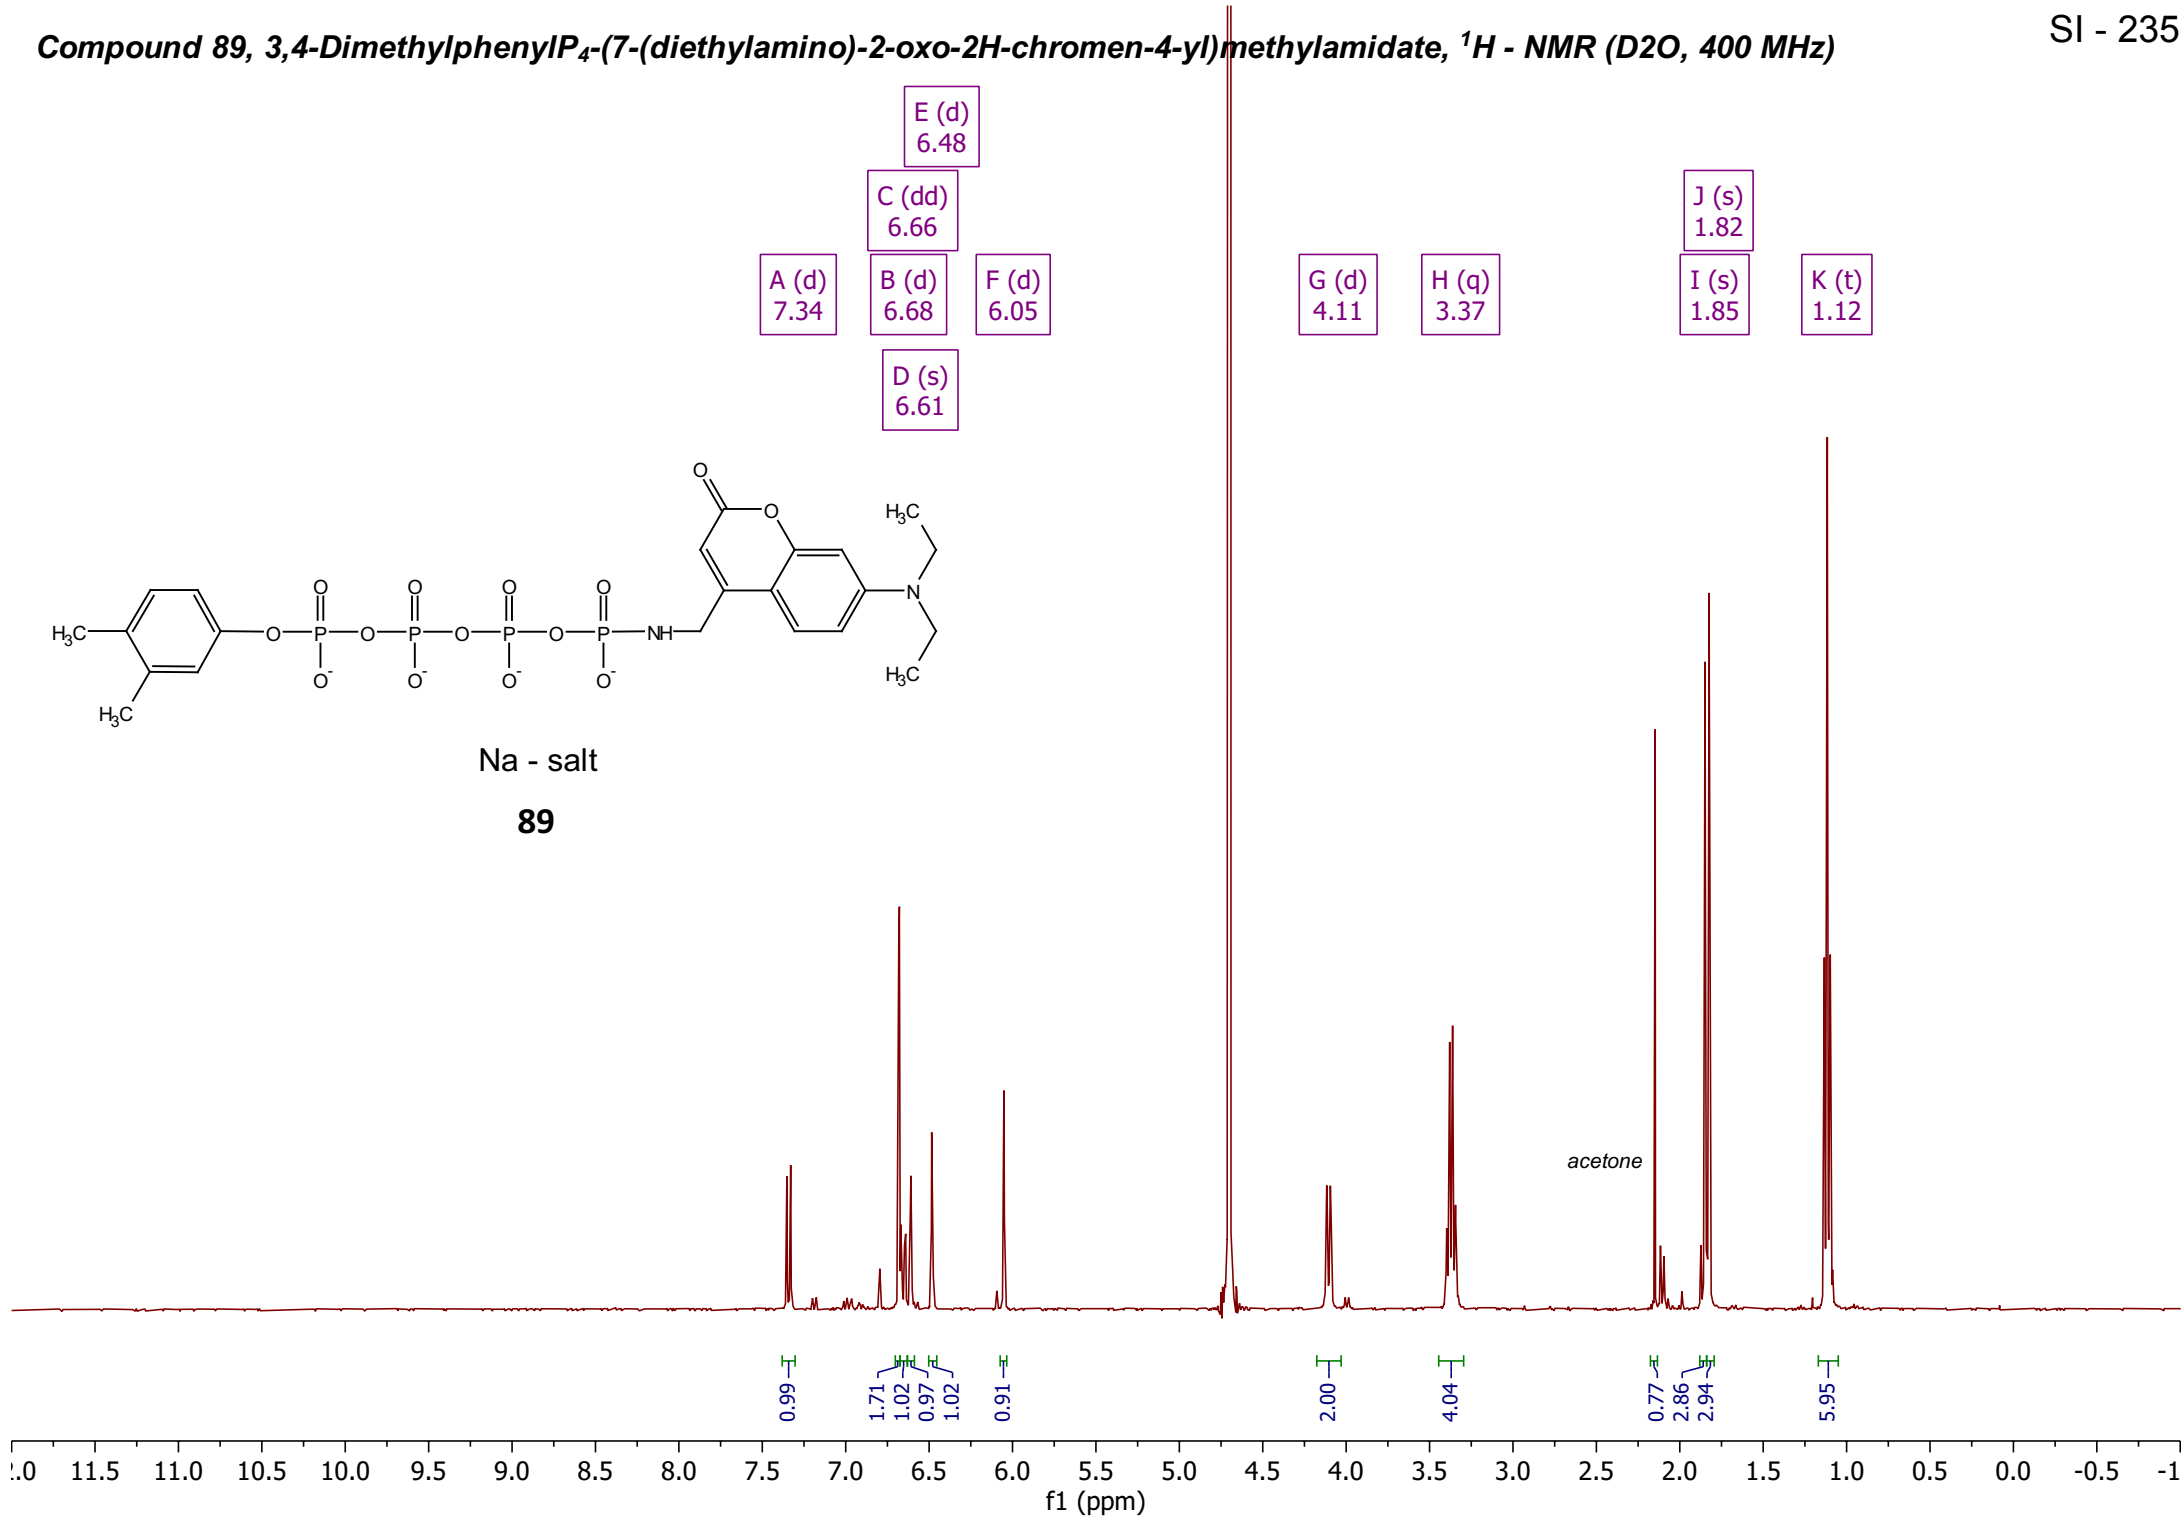

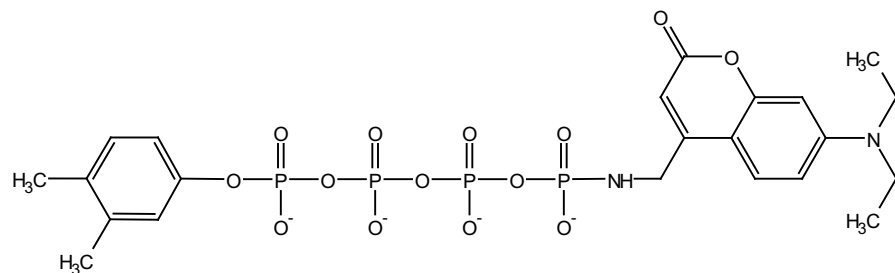

Na - salt

89

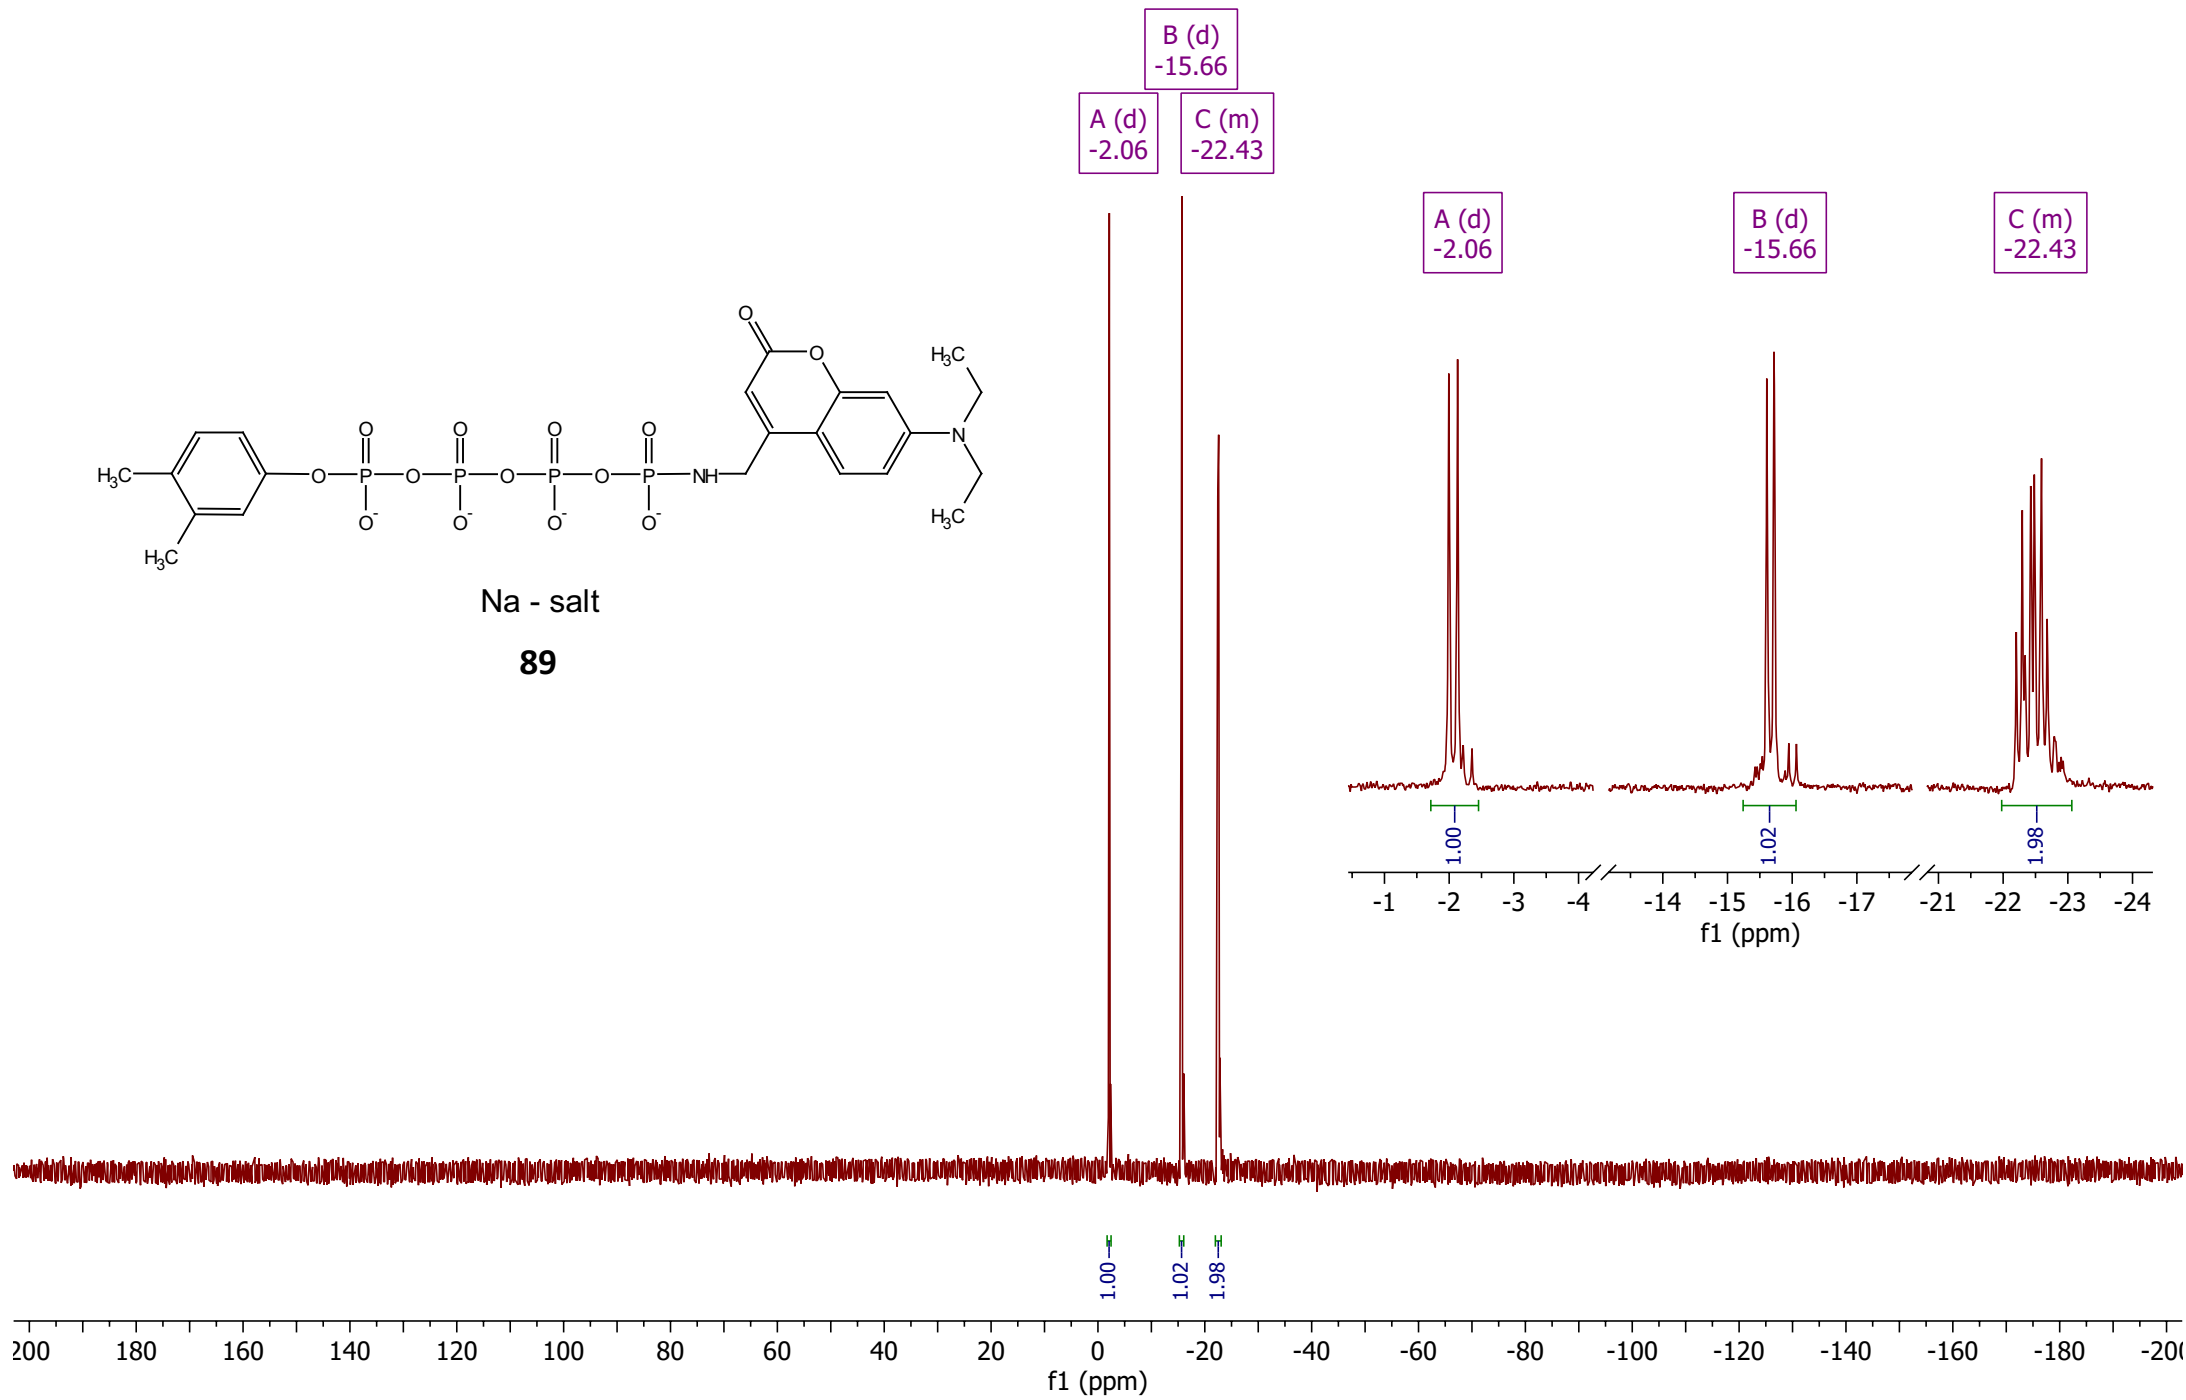

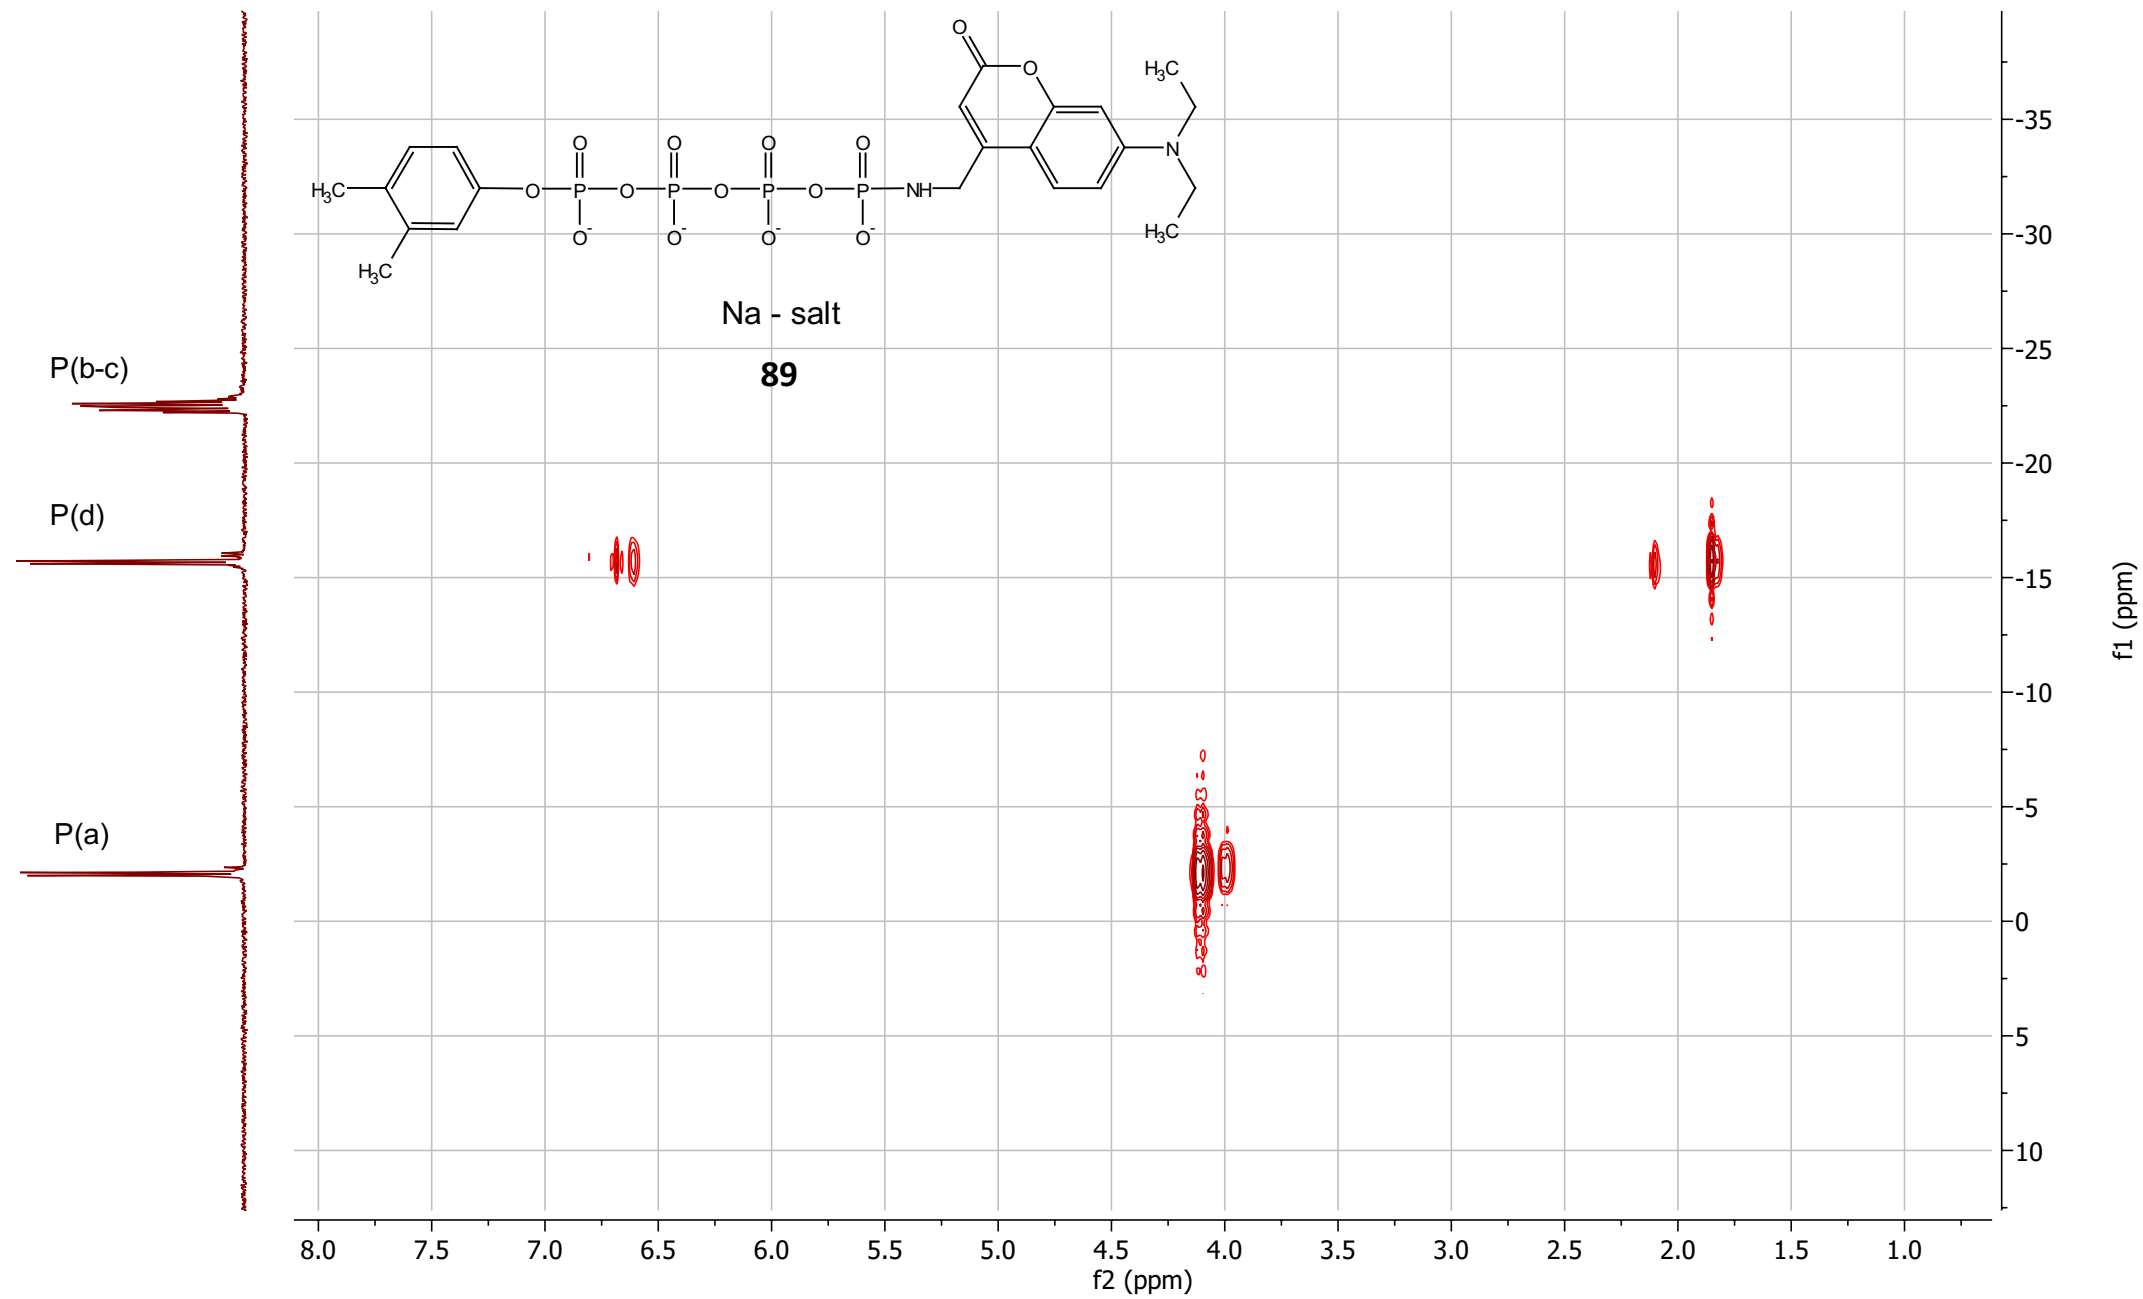



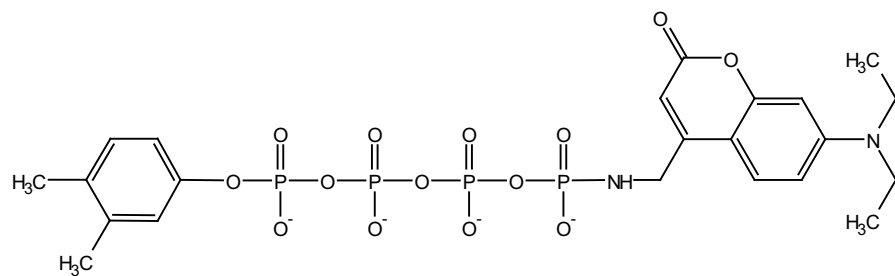

Na - salt

**89**

|                 |  |                 |  |                 |  |                 |  |                 |  |
|-----------------|--|-----------------|--|-----------------|--|-----------------|--|-----------------|--|
| E (s)<br>149.33 |  | J (d)<br>120.77 |  |                 |  | Q (s)<br>41.79  |  | S (s)<br>17.87  |  |
| B (d)<br>158.76 |  | G (s)<br>132.15 |  | K (d)<br>116.92 |  | N (s)<br>103.17 |  | R (s)<br>18.68  |  |
| A (s)<br>166.32 |  | D (s)<br>151.04 |  | F (s)<br>137.94 |  | I (s)<br>125.31 |  | L (s)<br>110.15 |  |
|                 |  |                 |  |                 |  |                 |  | O (s)<br>96.95  |  |
| C (s)<br>155.03 |  | H (s)<br>129.87 |  | M (s)<br>107.07 |  |                 |  | T (s)<br>11.61  |  |
|                 |  |                 |  |                 |  |                 |  | P (s)<br>44.44  |  |

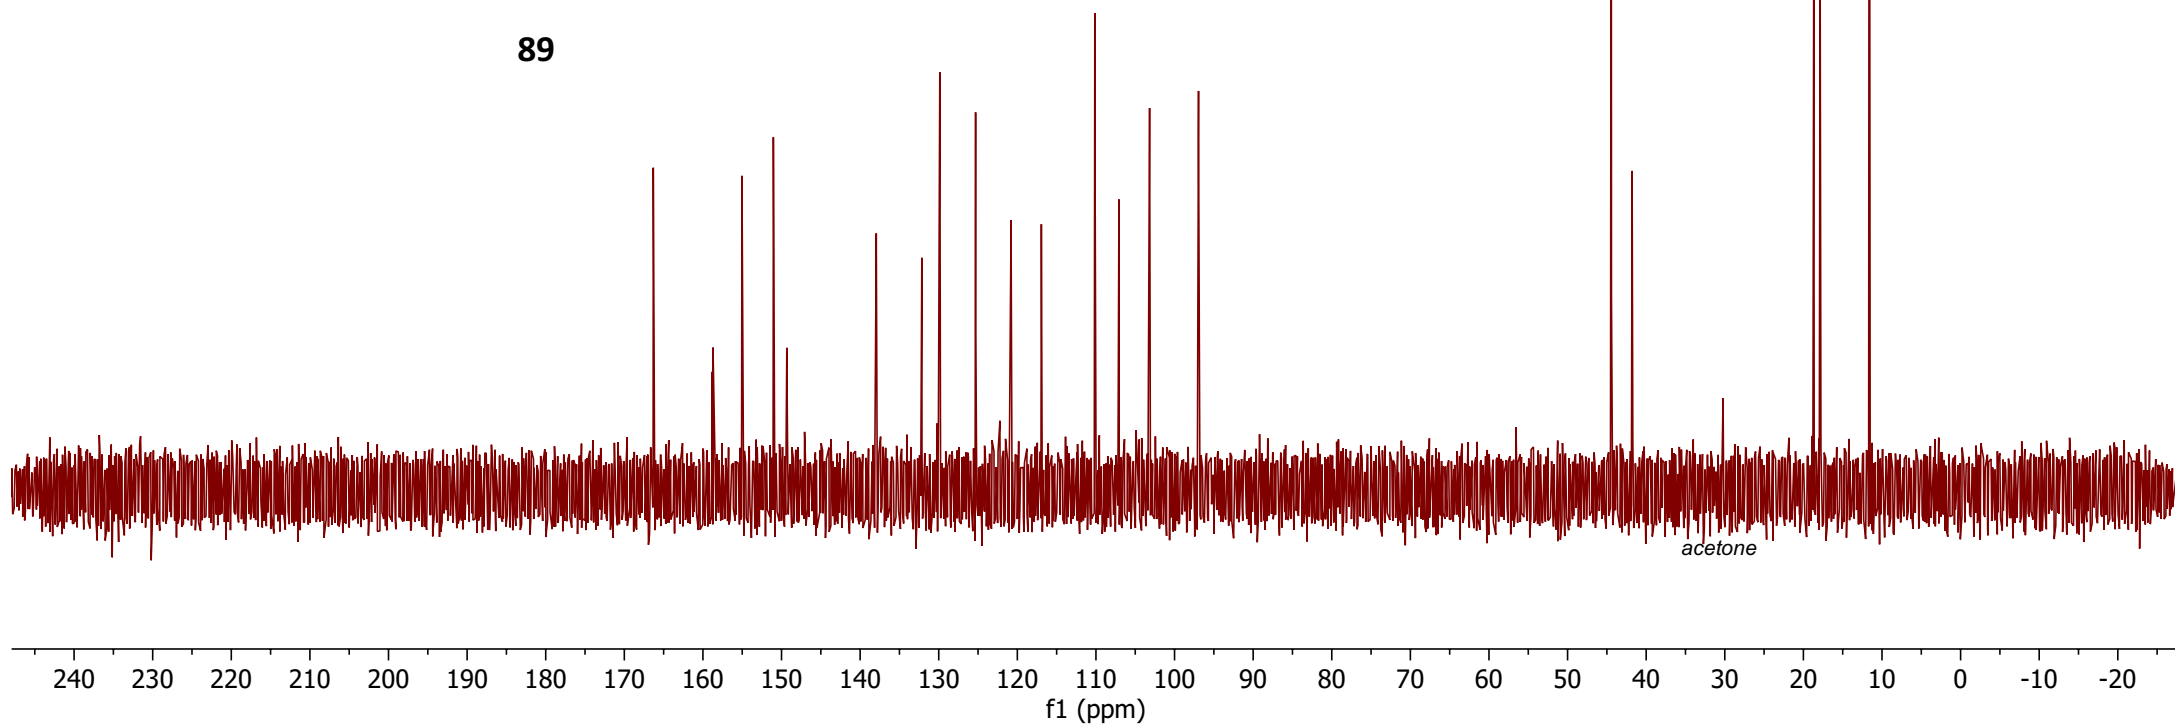

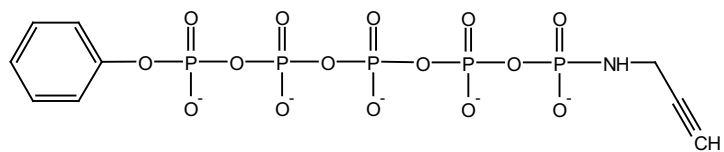

Na - salt  
**90**

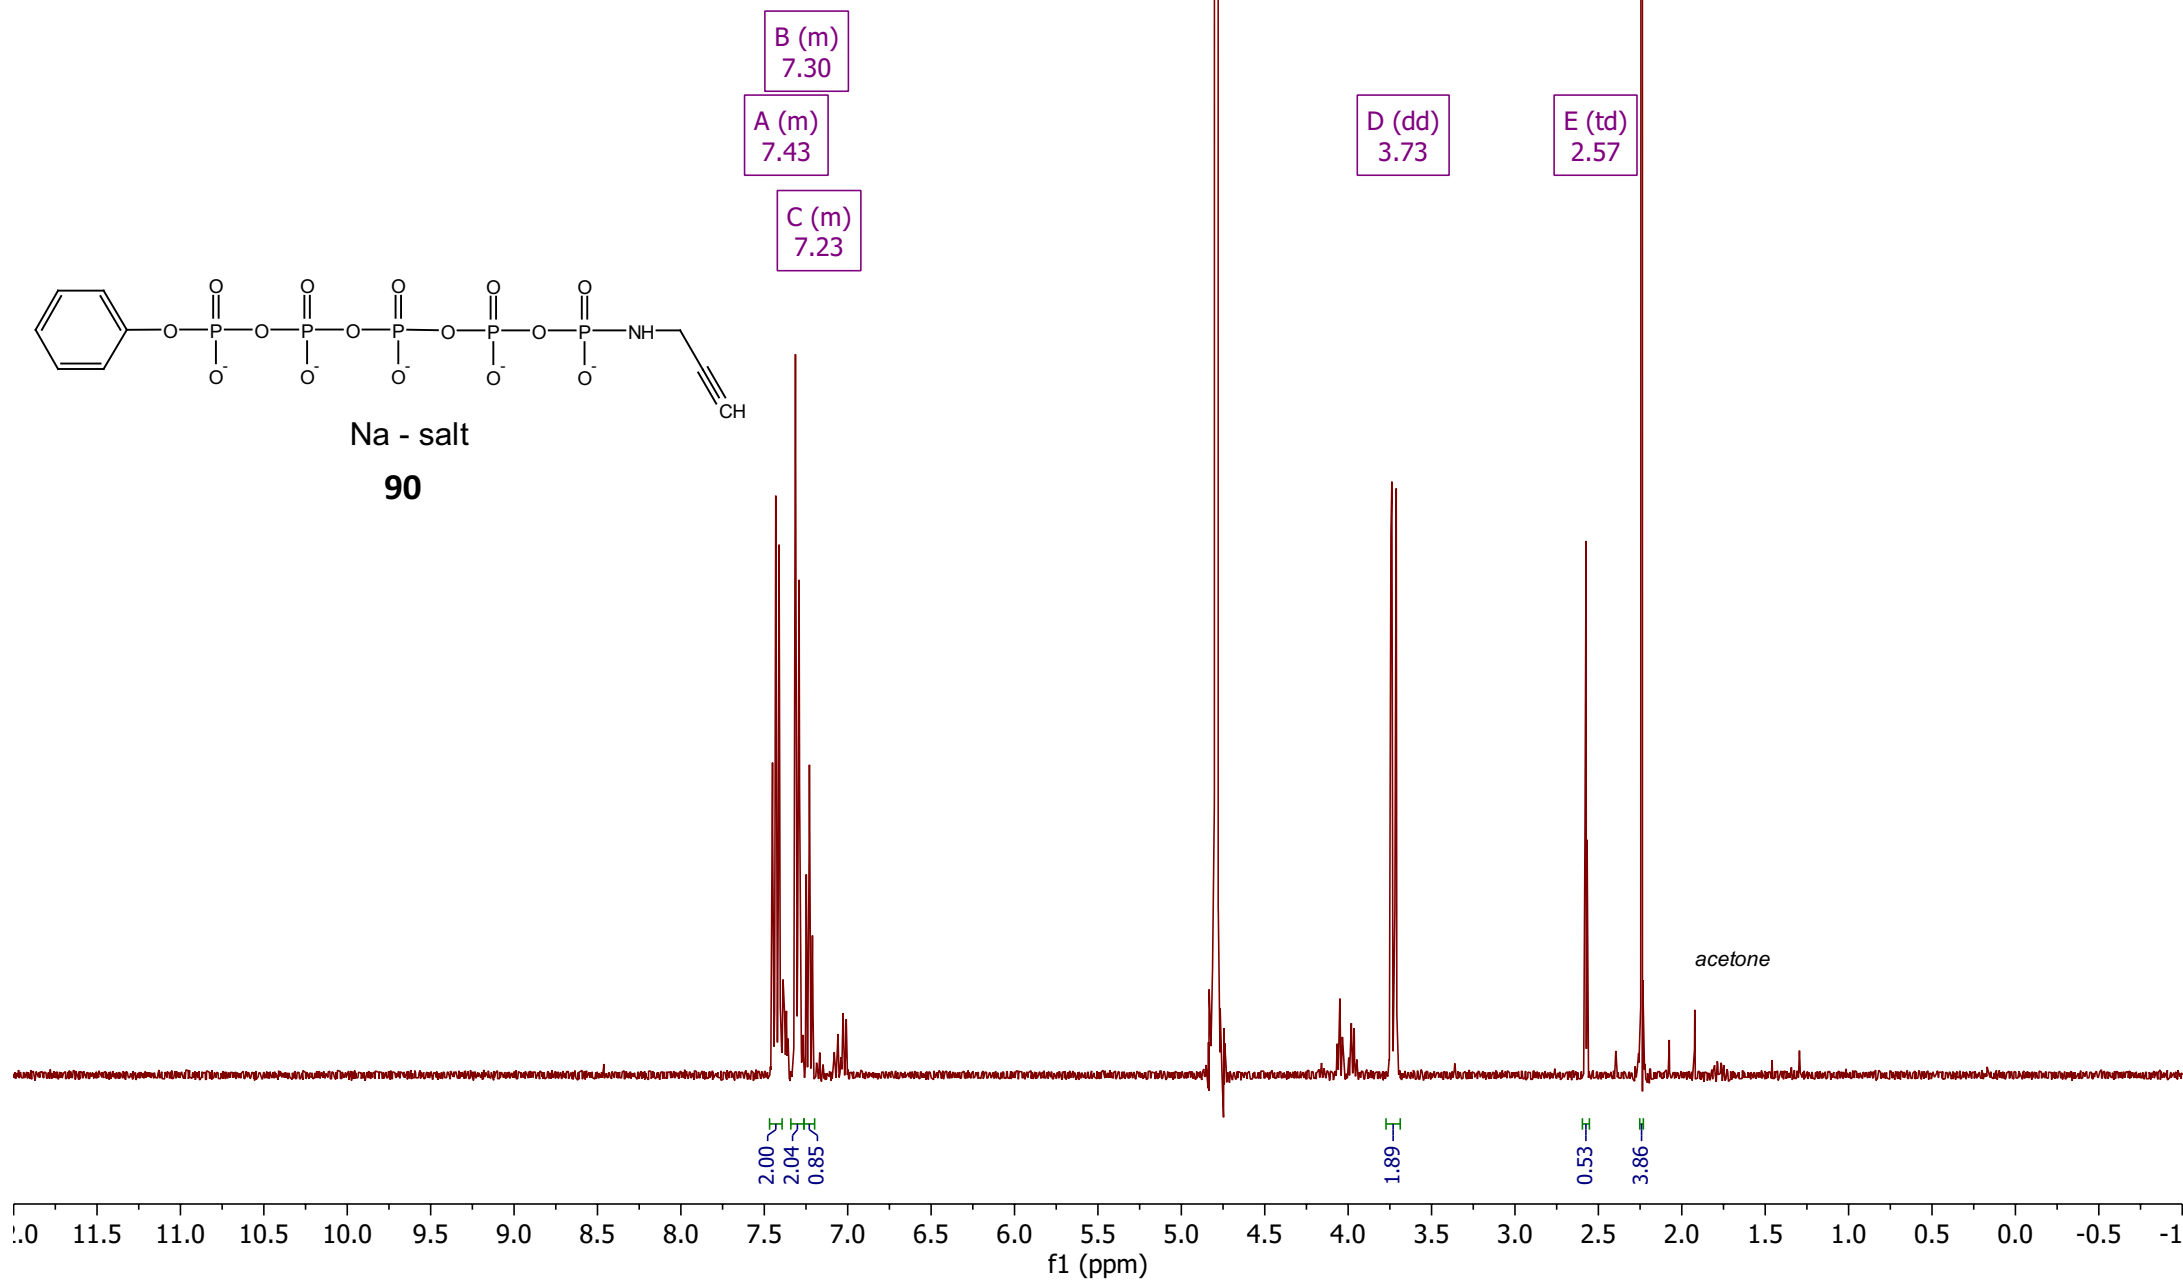

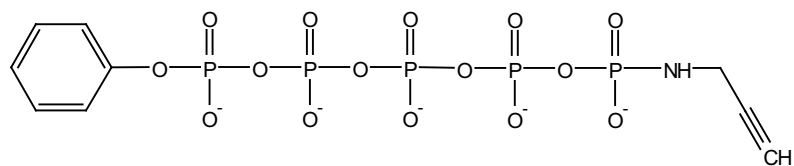

Na - salt  
**90**

A (d)  
-2.34

B (d)  
-15.55

C (m)  
-22.48

A (d)  
-2.34

B (d)  
-15.55

C (m)  
-22.48

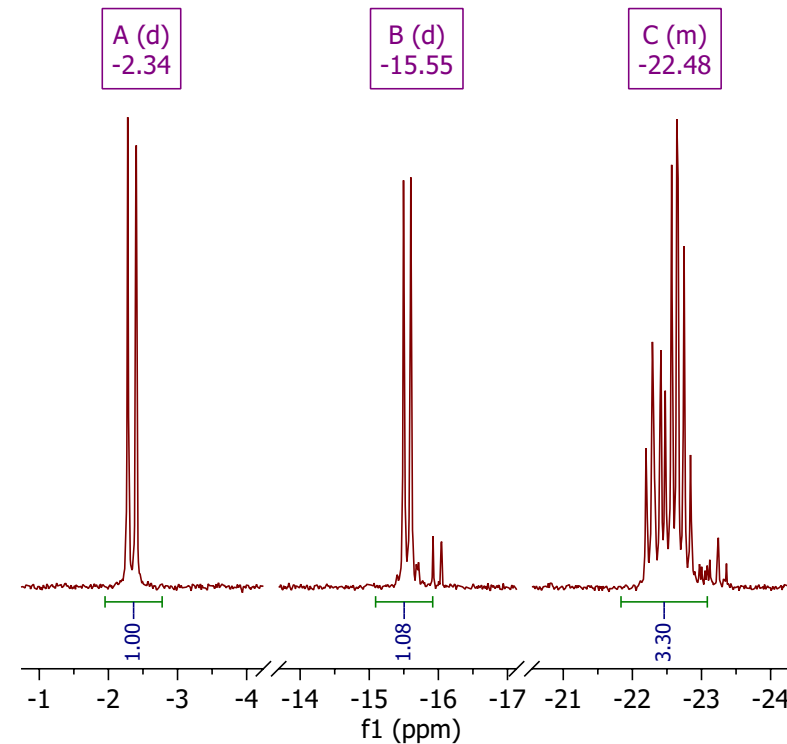

1.00

1.08

3.30

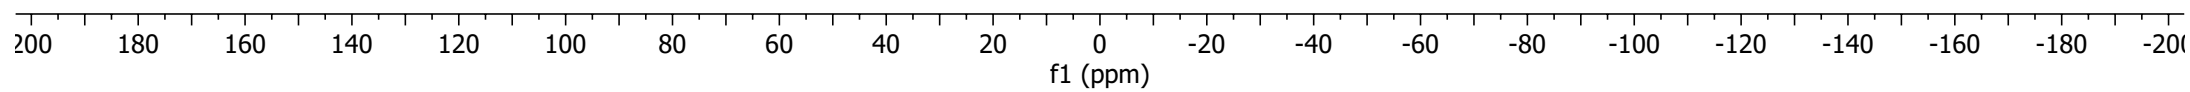

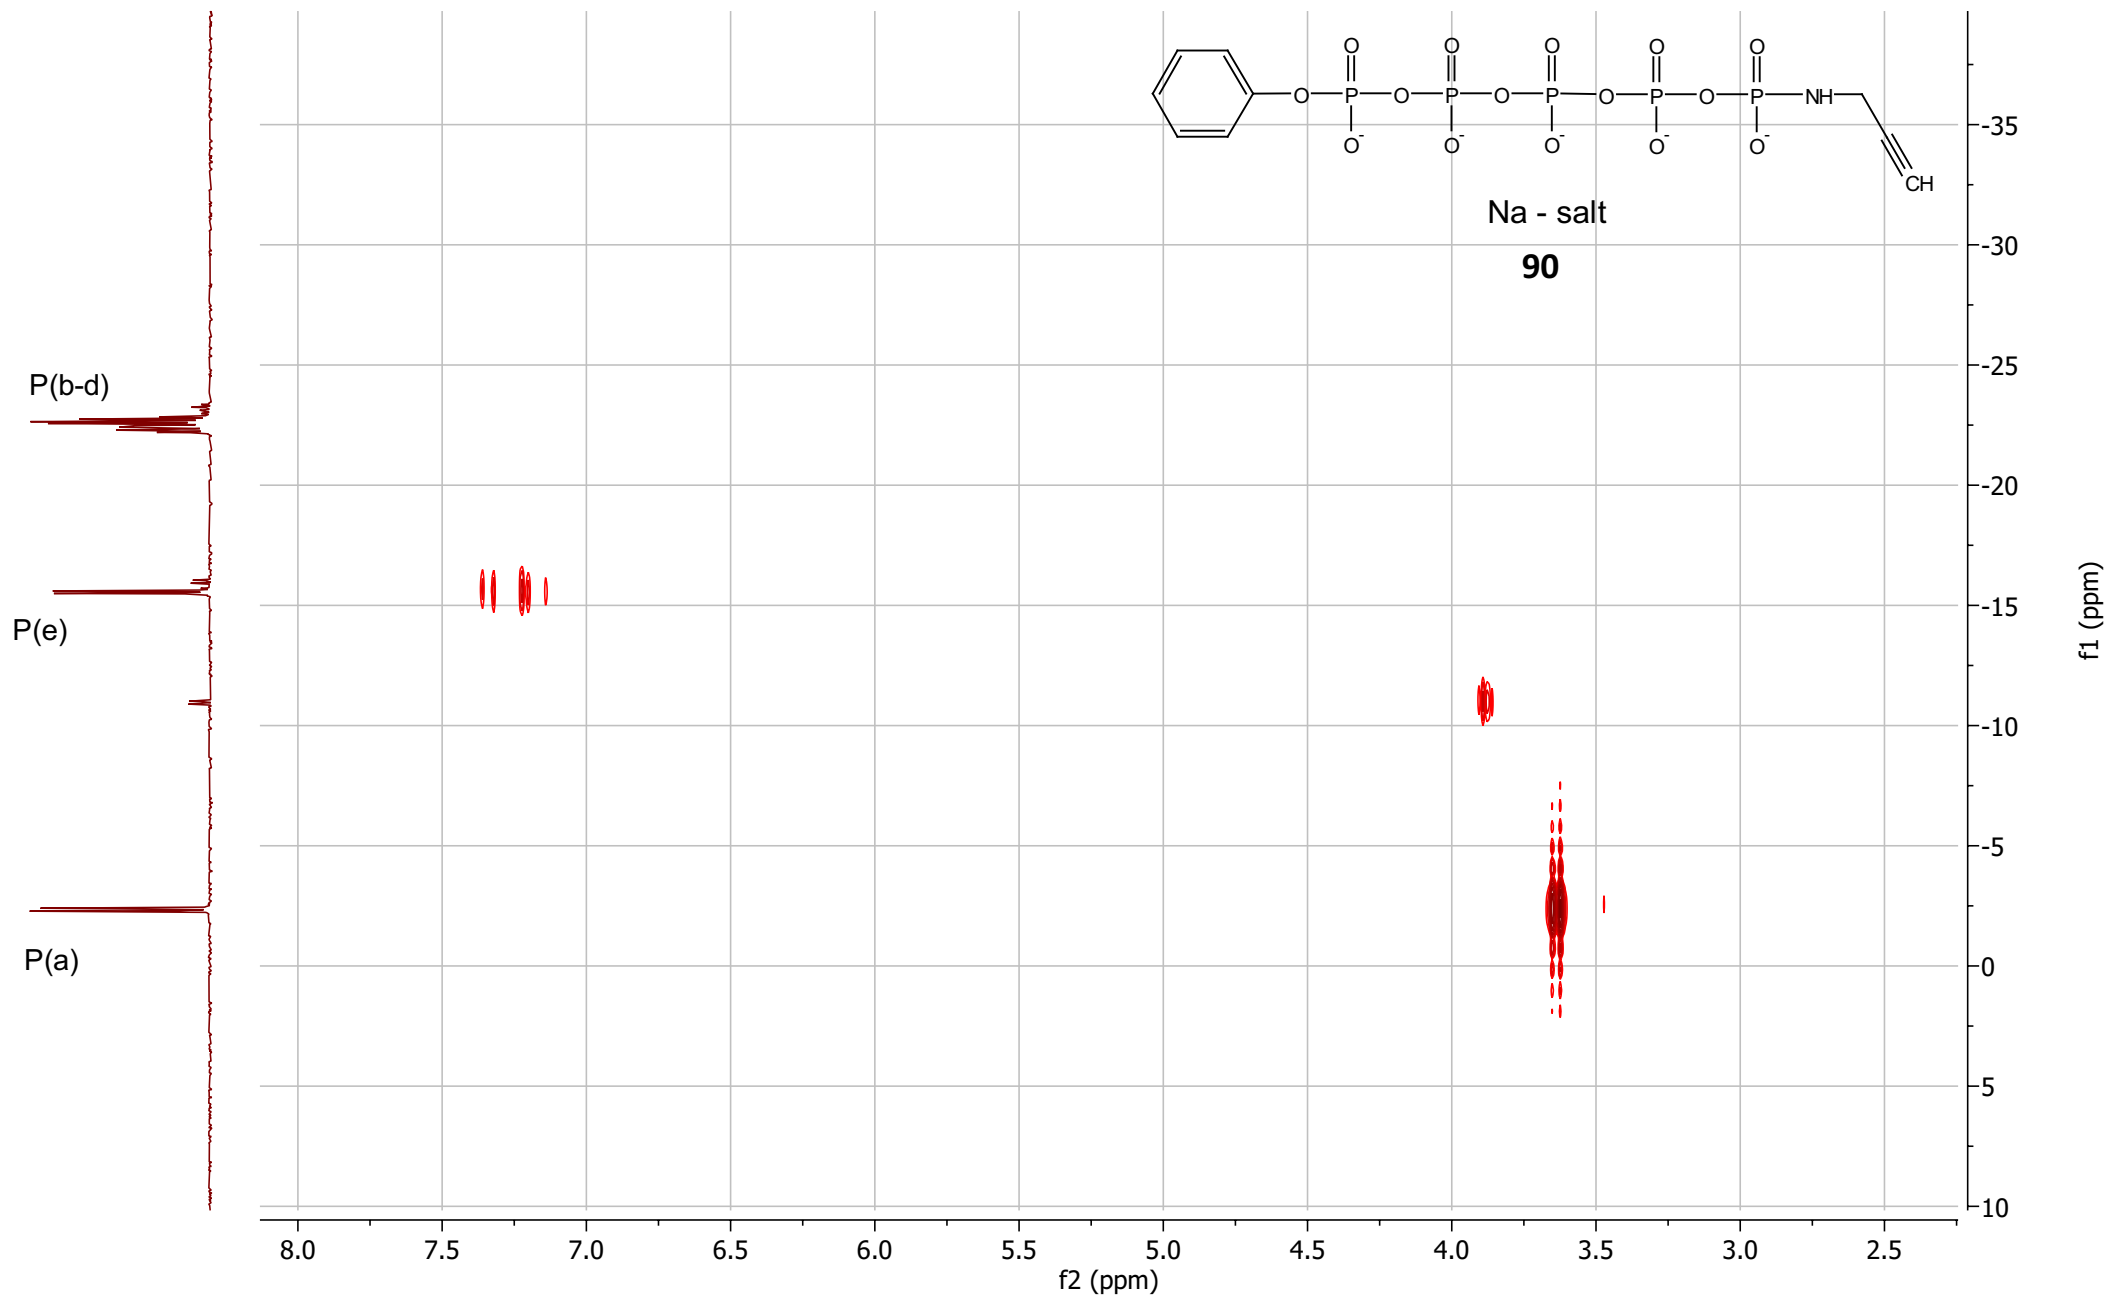

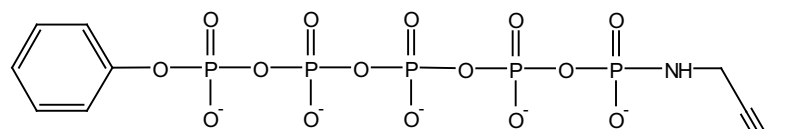

Na - salt

**90**

A (d)  
151.70

B (s)  
129.71

C (d)  
124.39

D (d)  
120.68

G (s)  
68.14

F (s)  
30.95

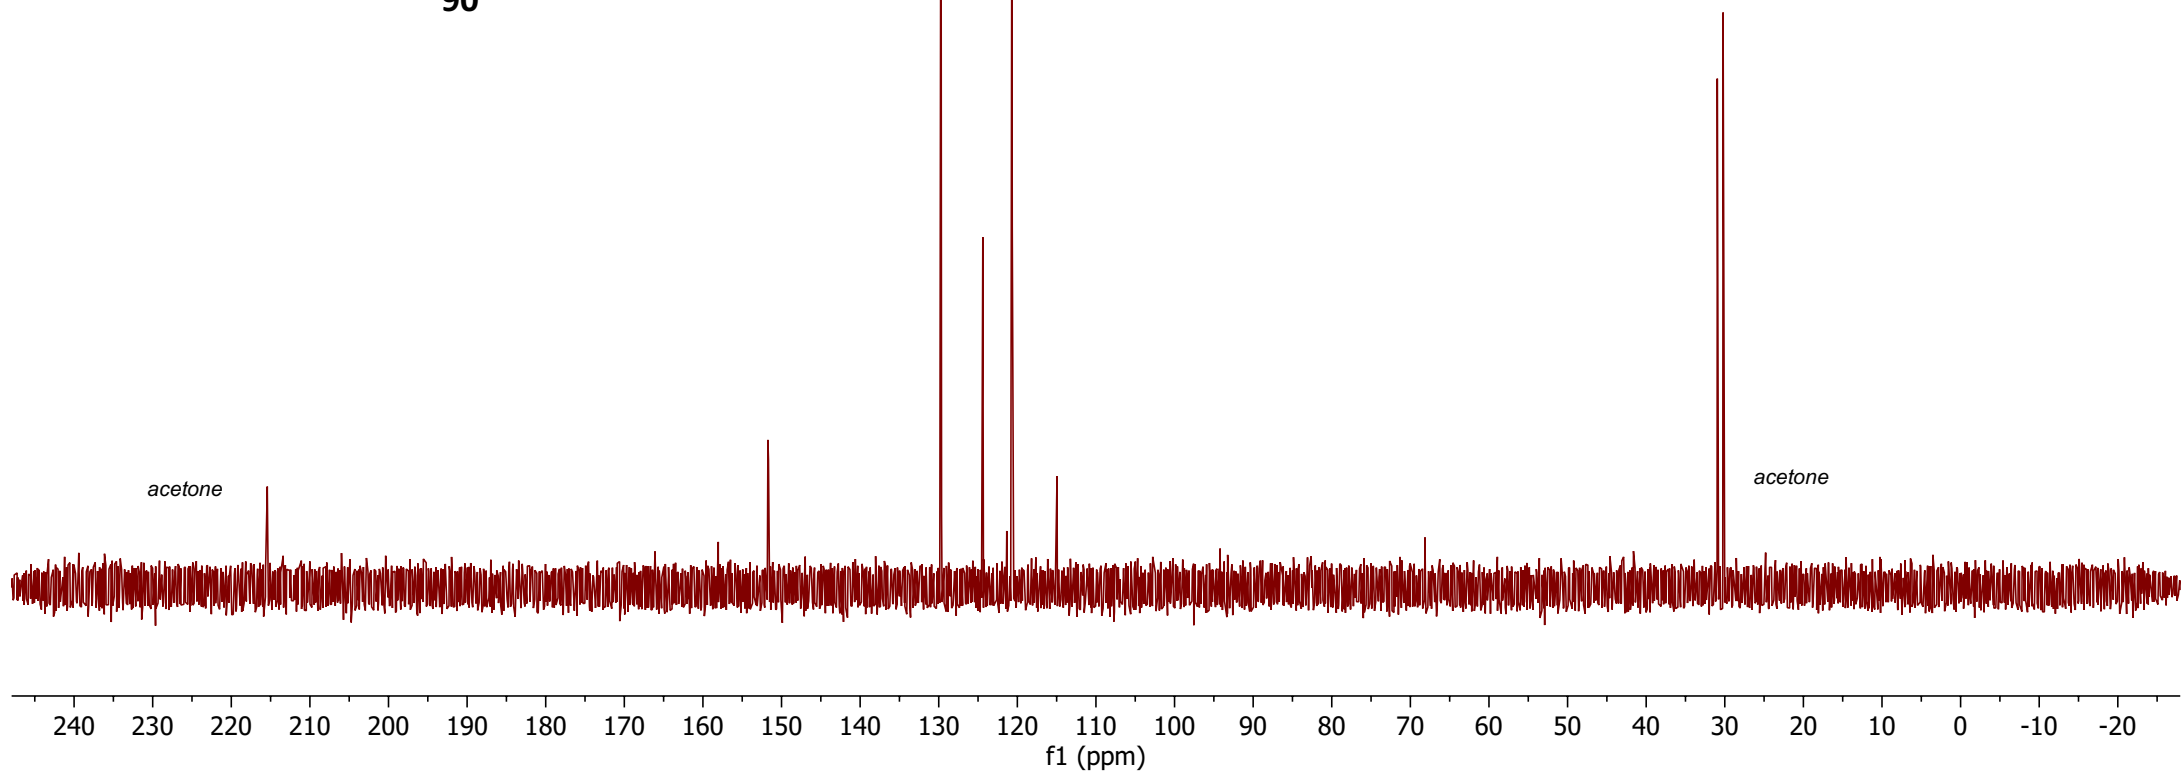

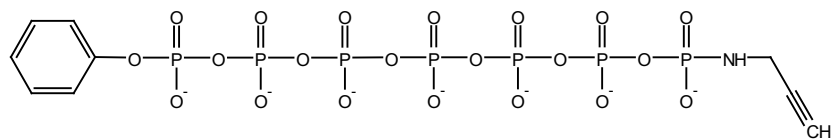

Na - salt

**91**

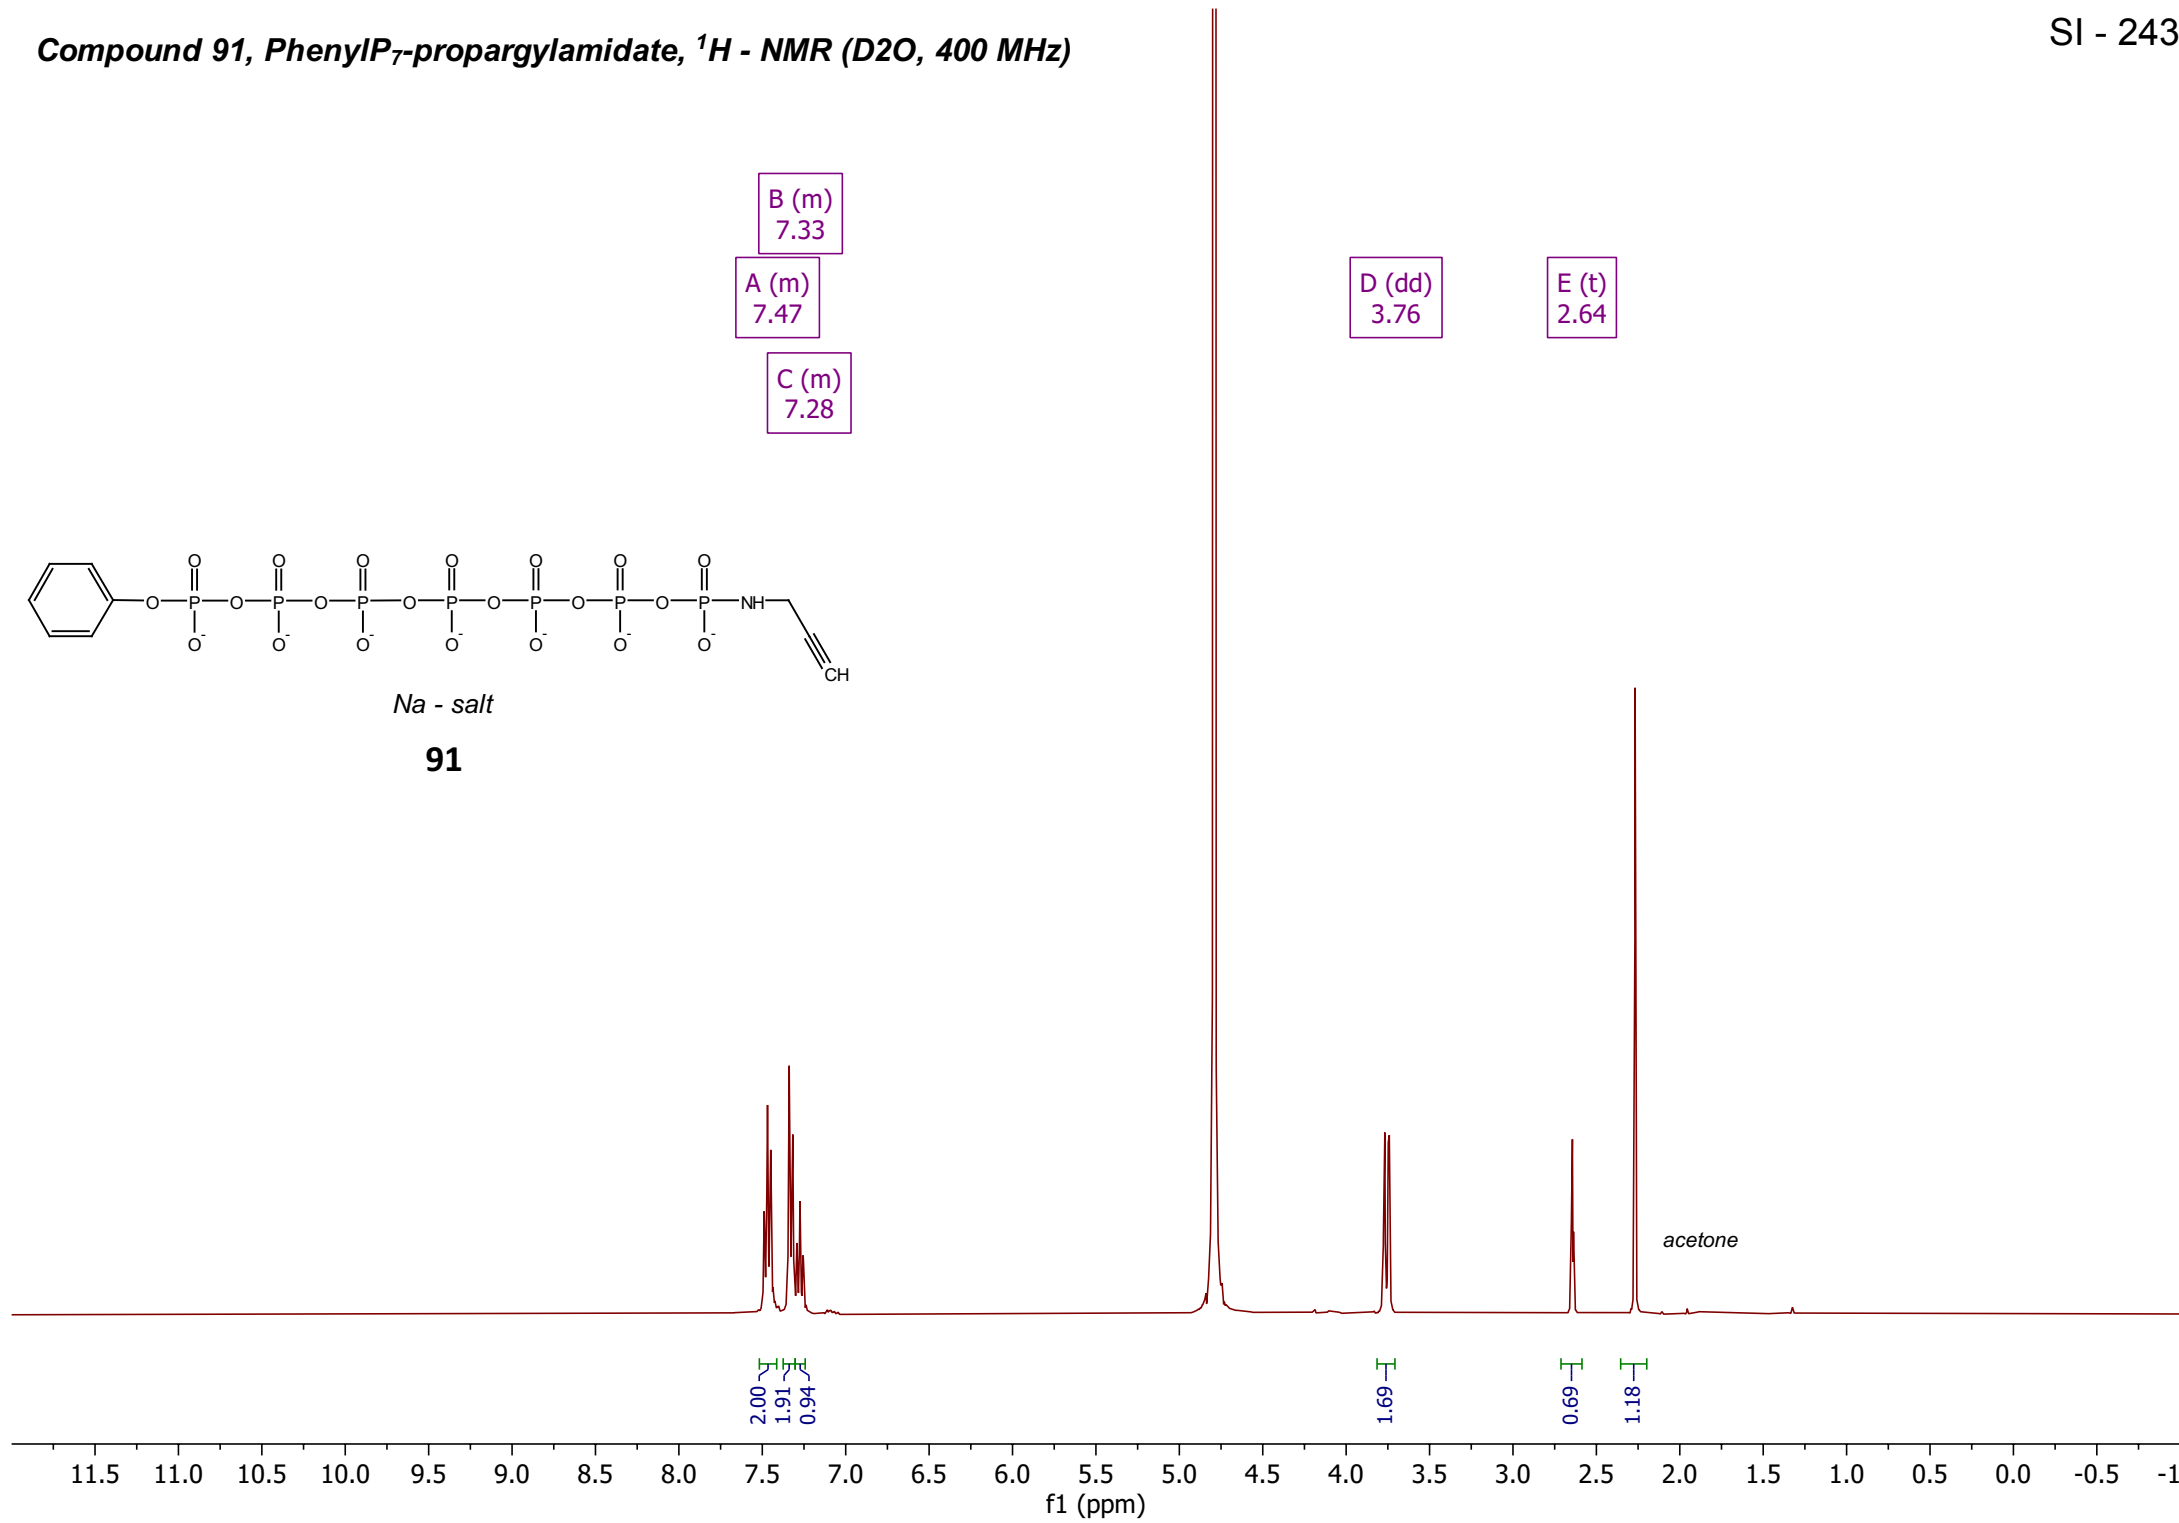

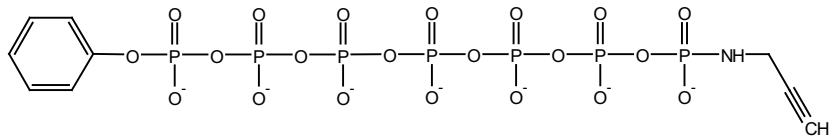

Na - salt

**91**

A (m)  
-2.03
B (d)  
-15.33
C (dd)  
-22.20
  
D (m)  
-21.80

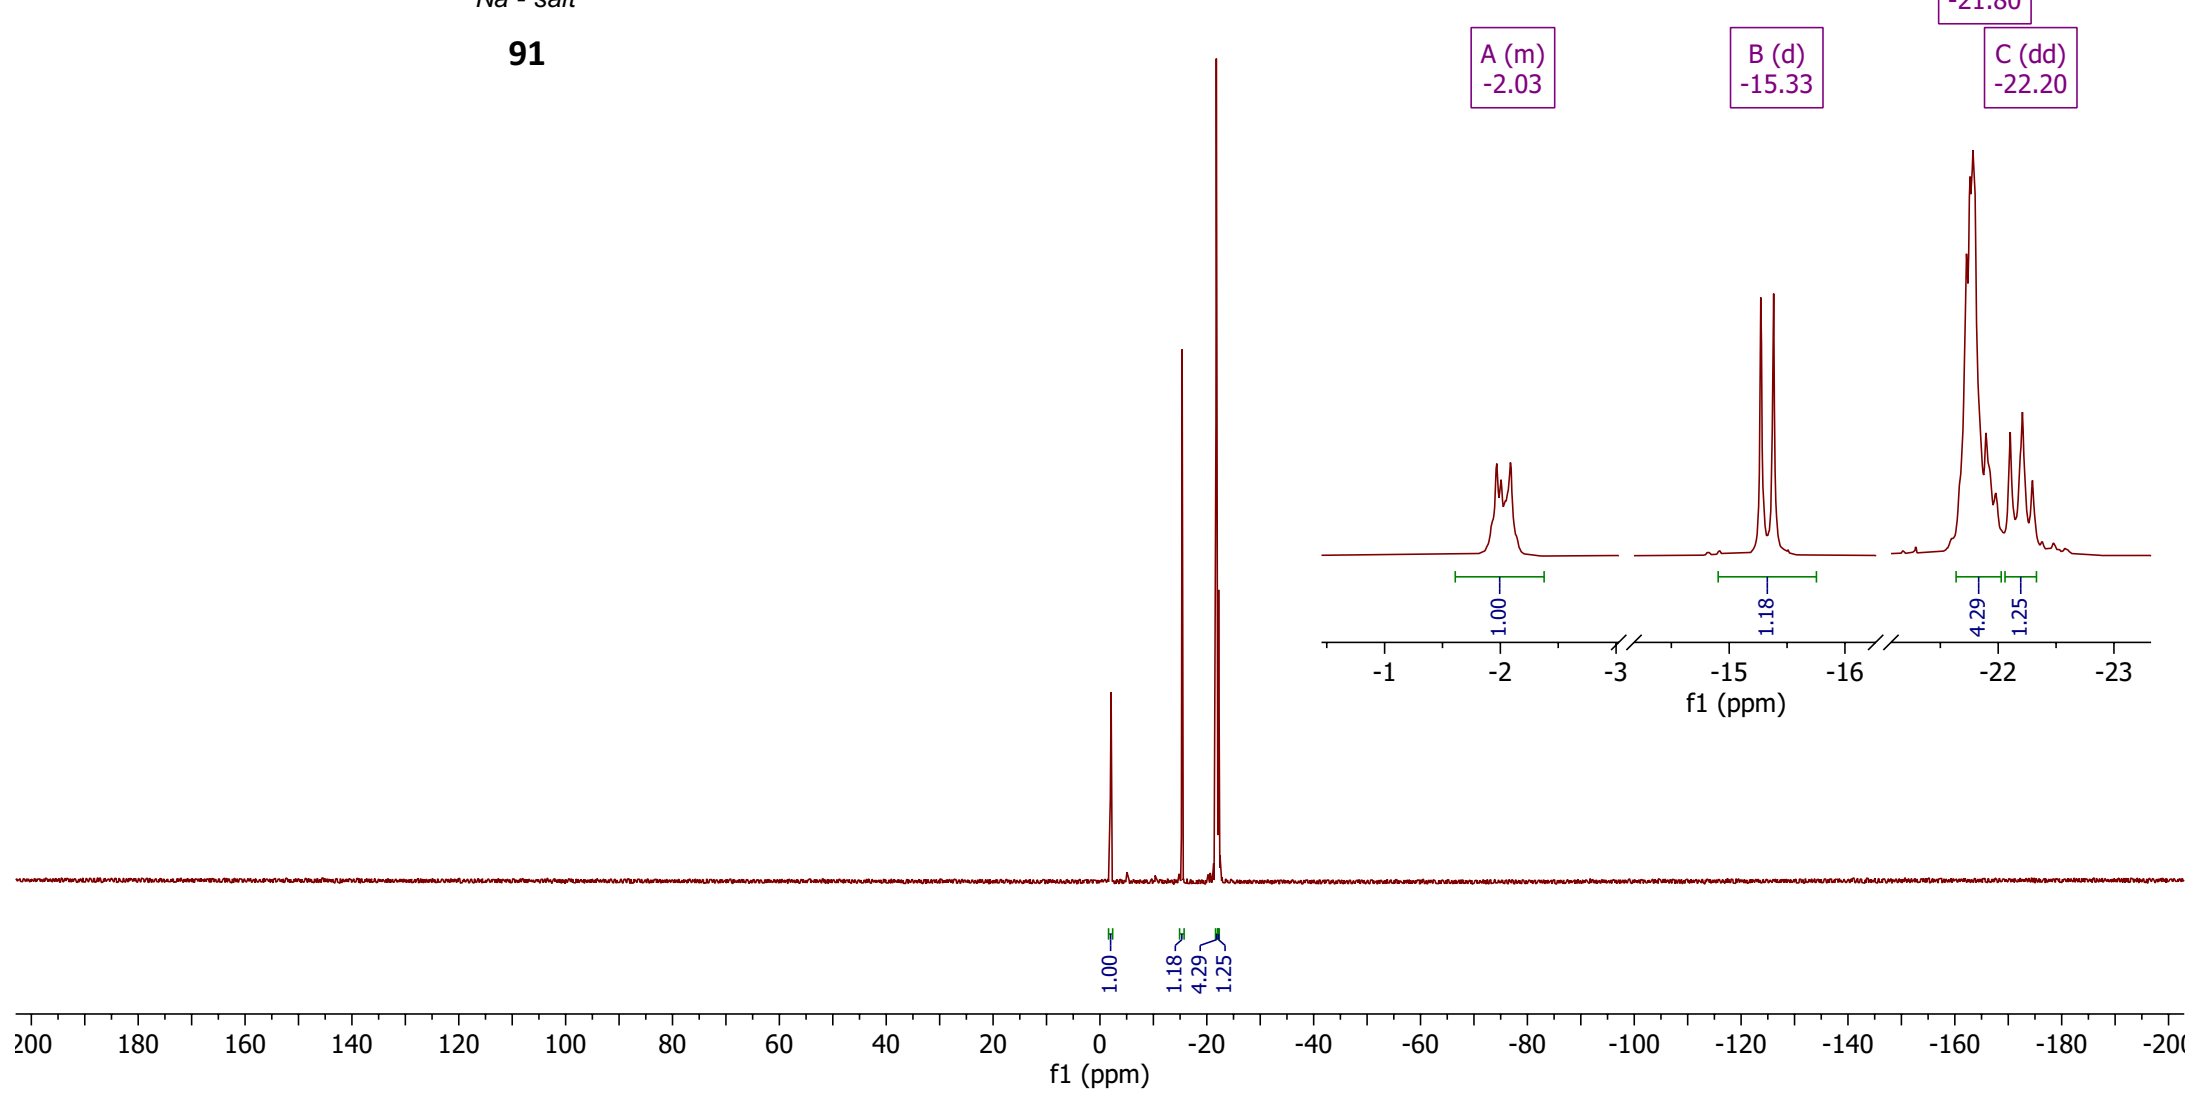

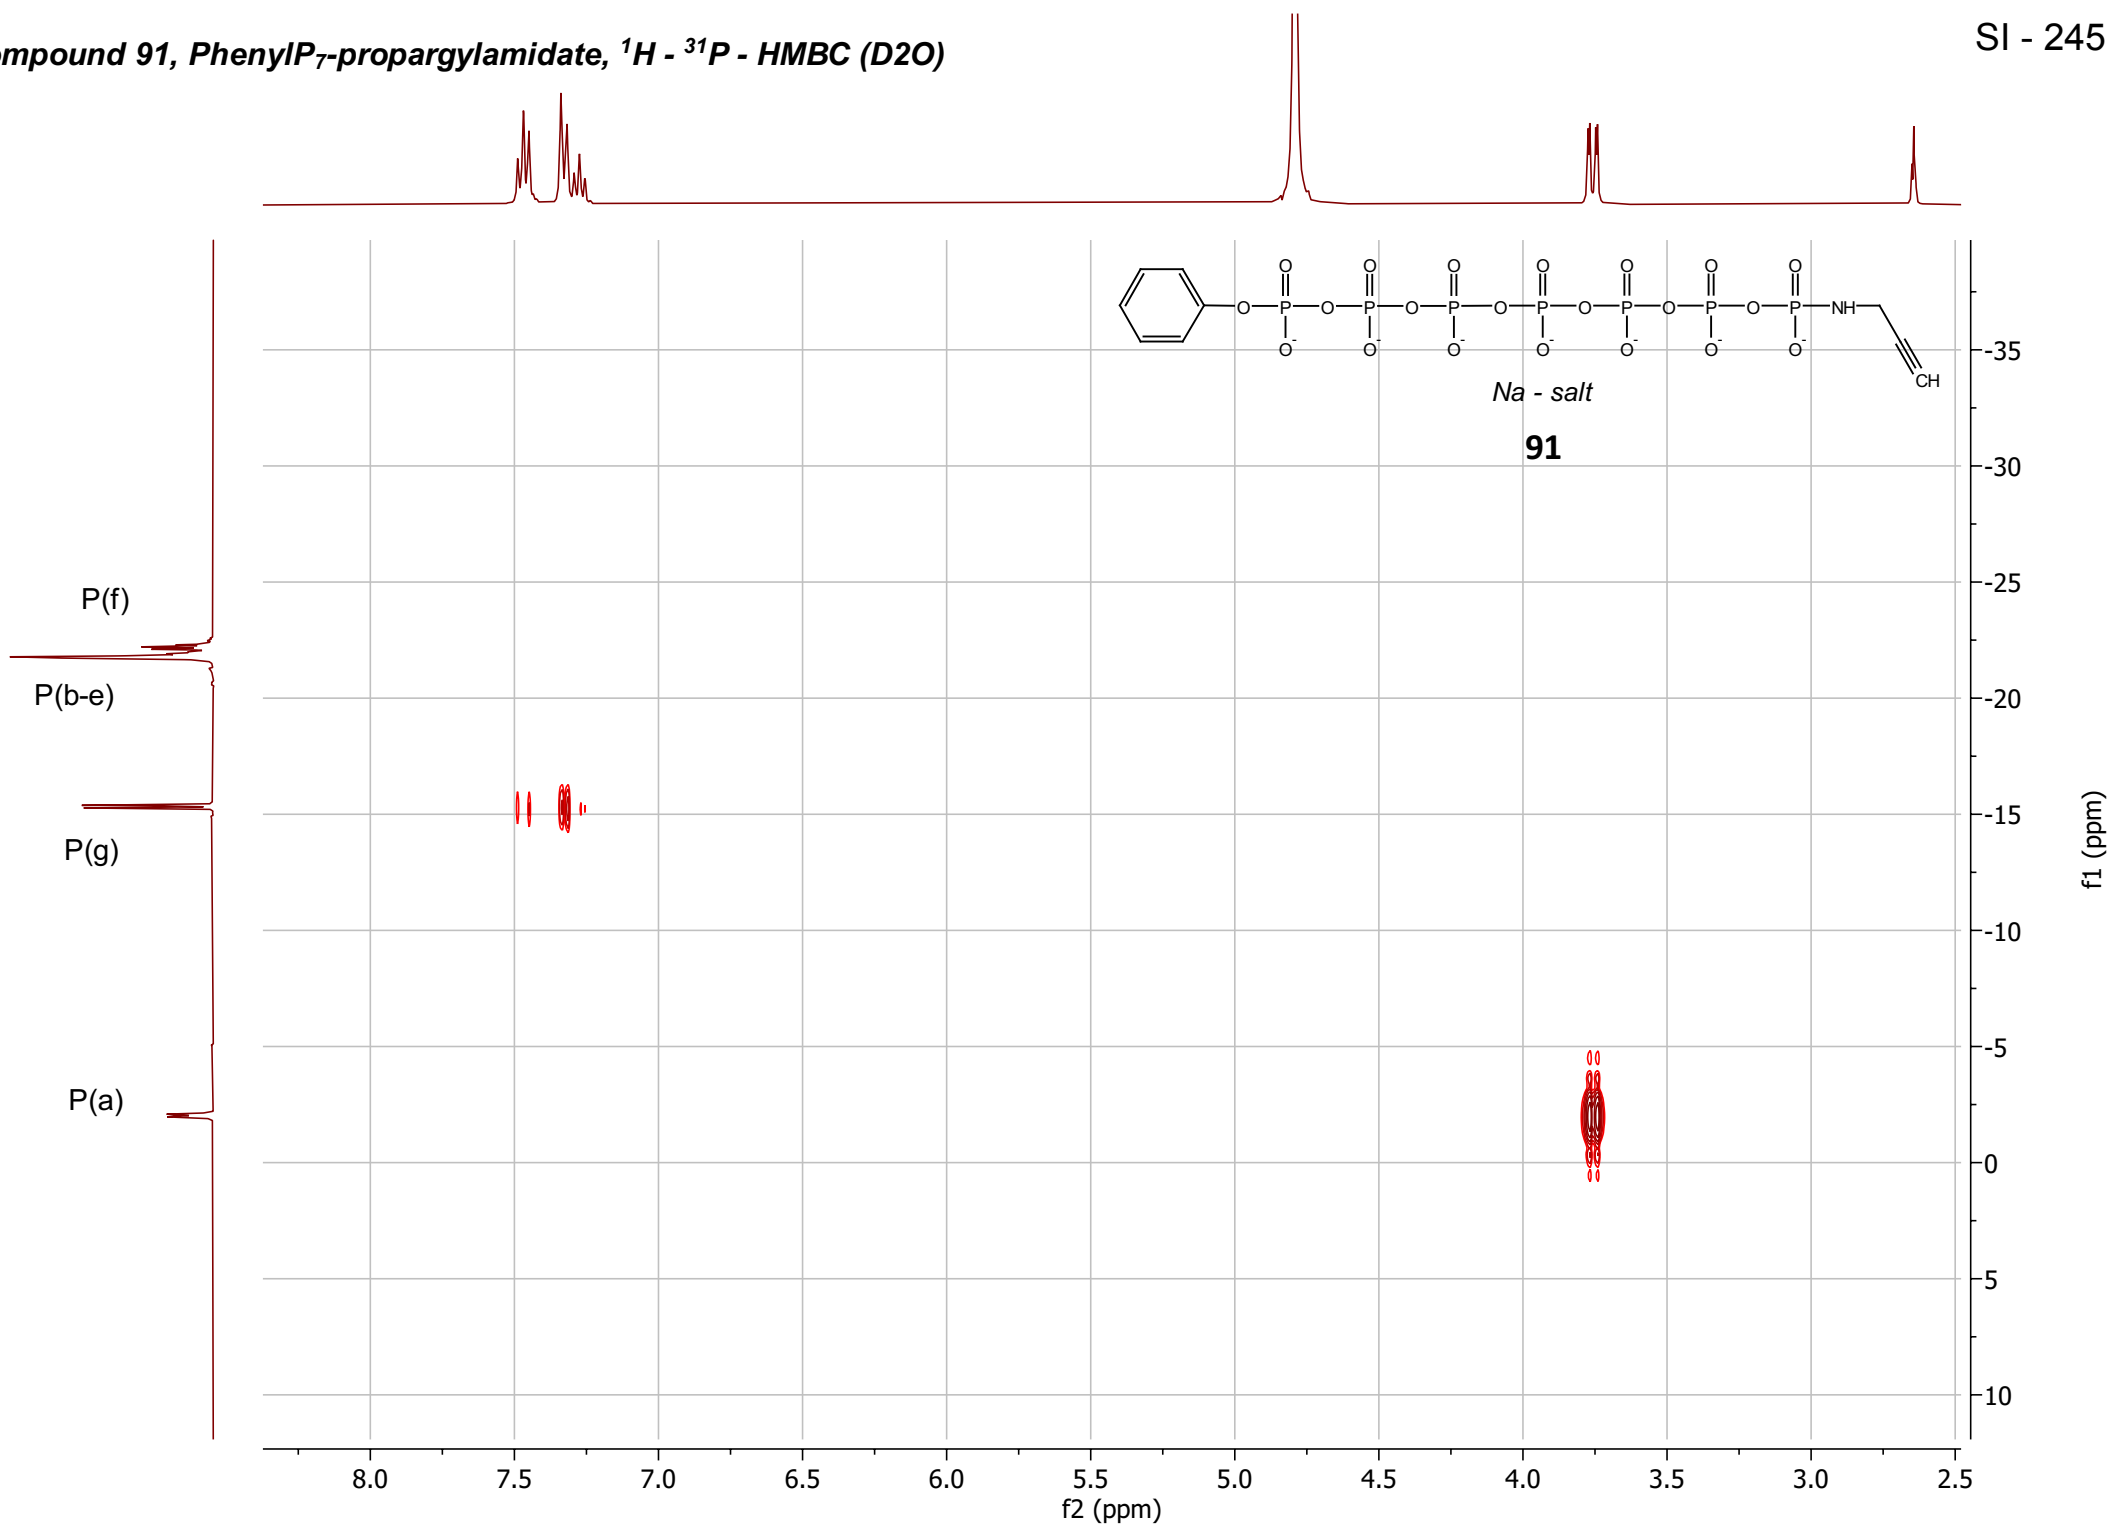



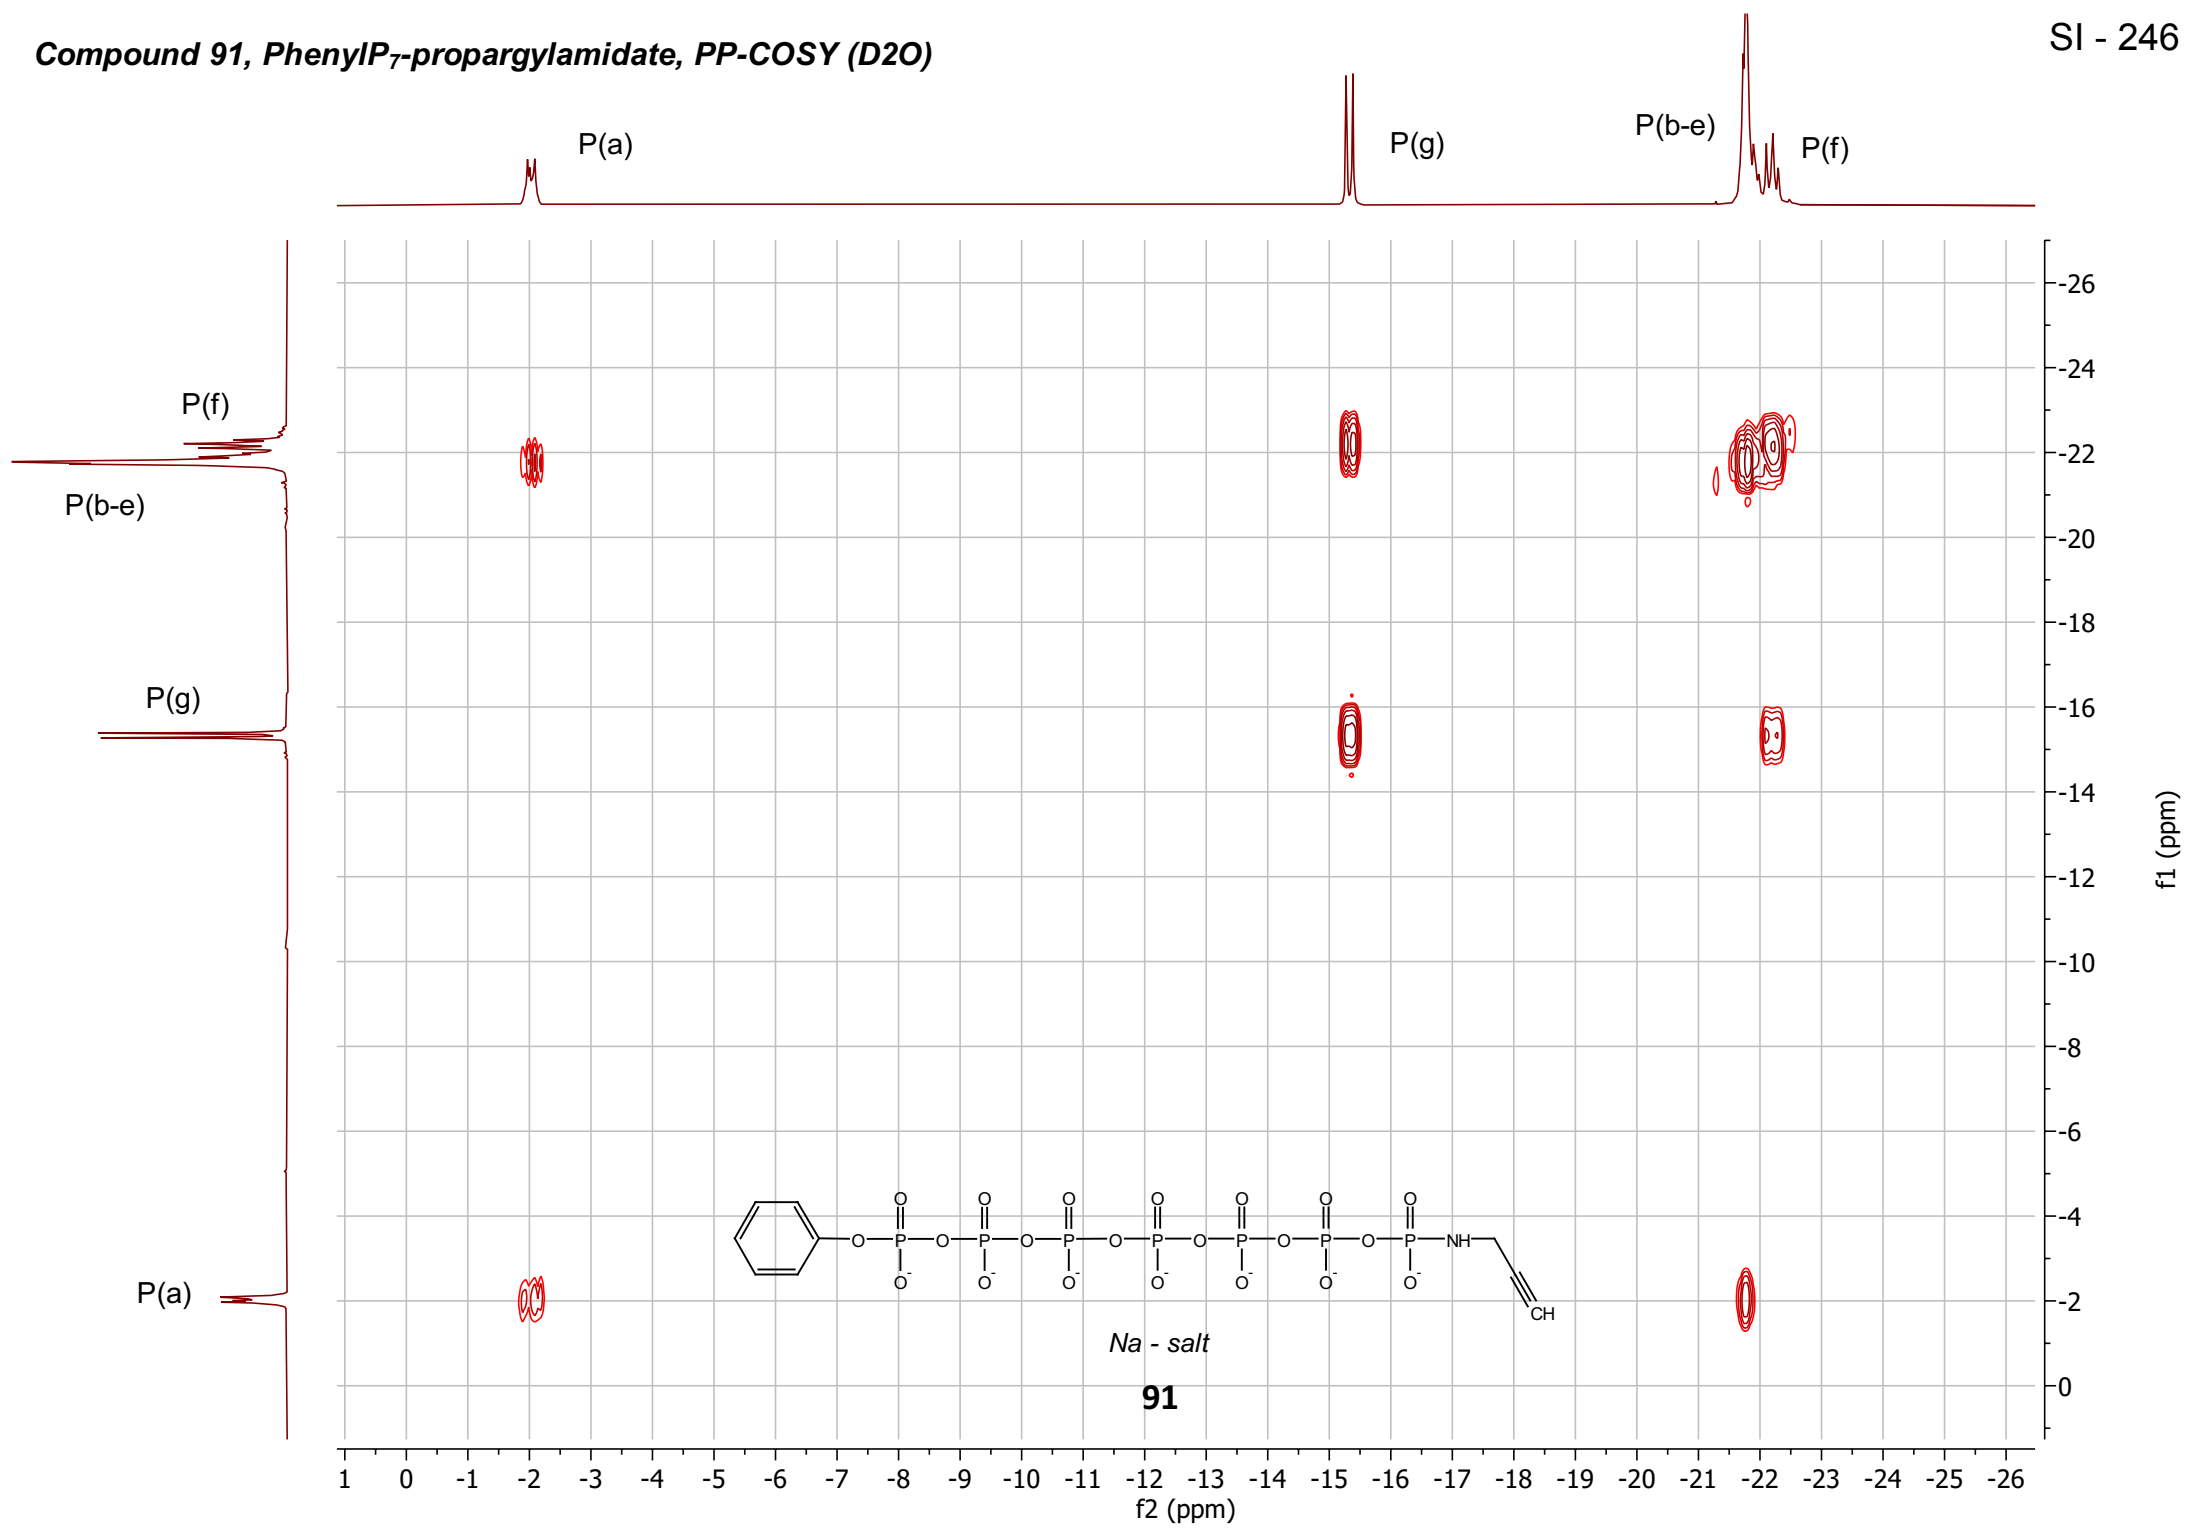

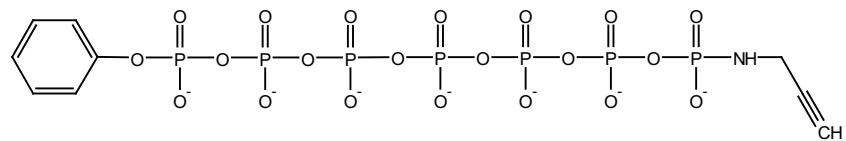

Na - salt

**91**

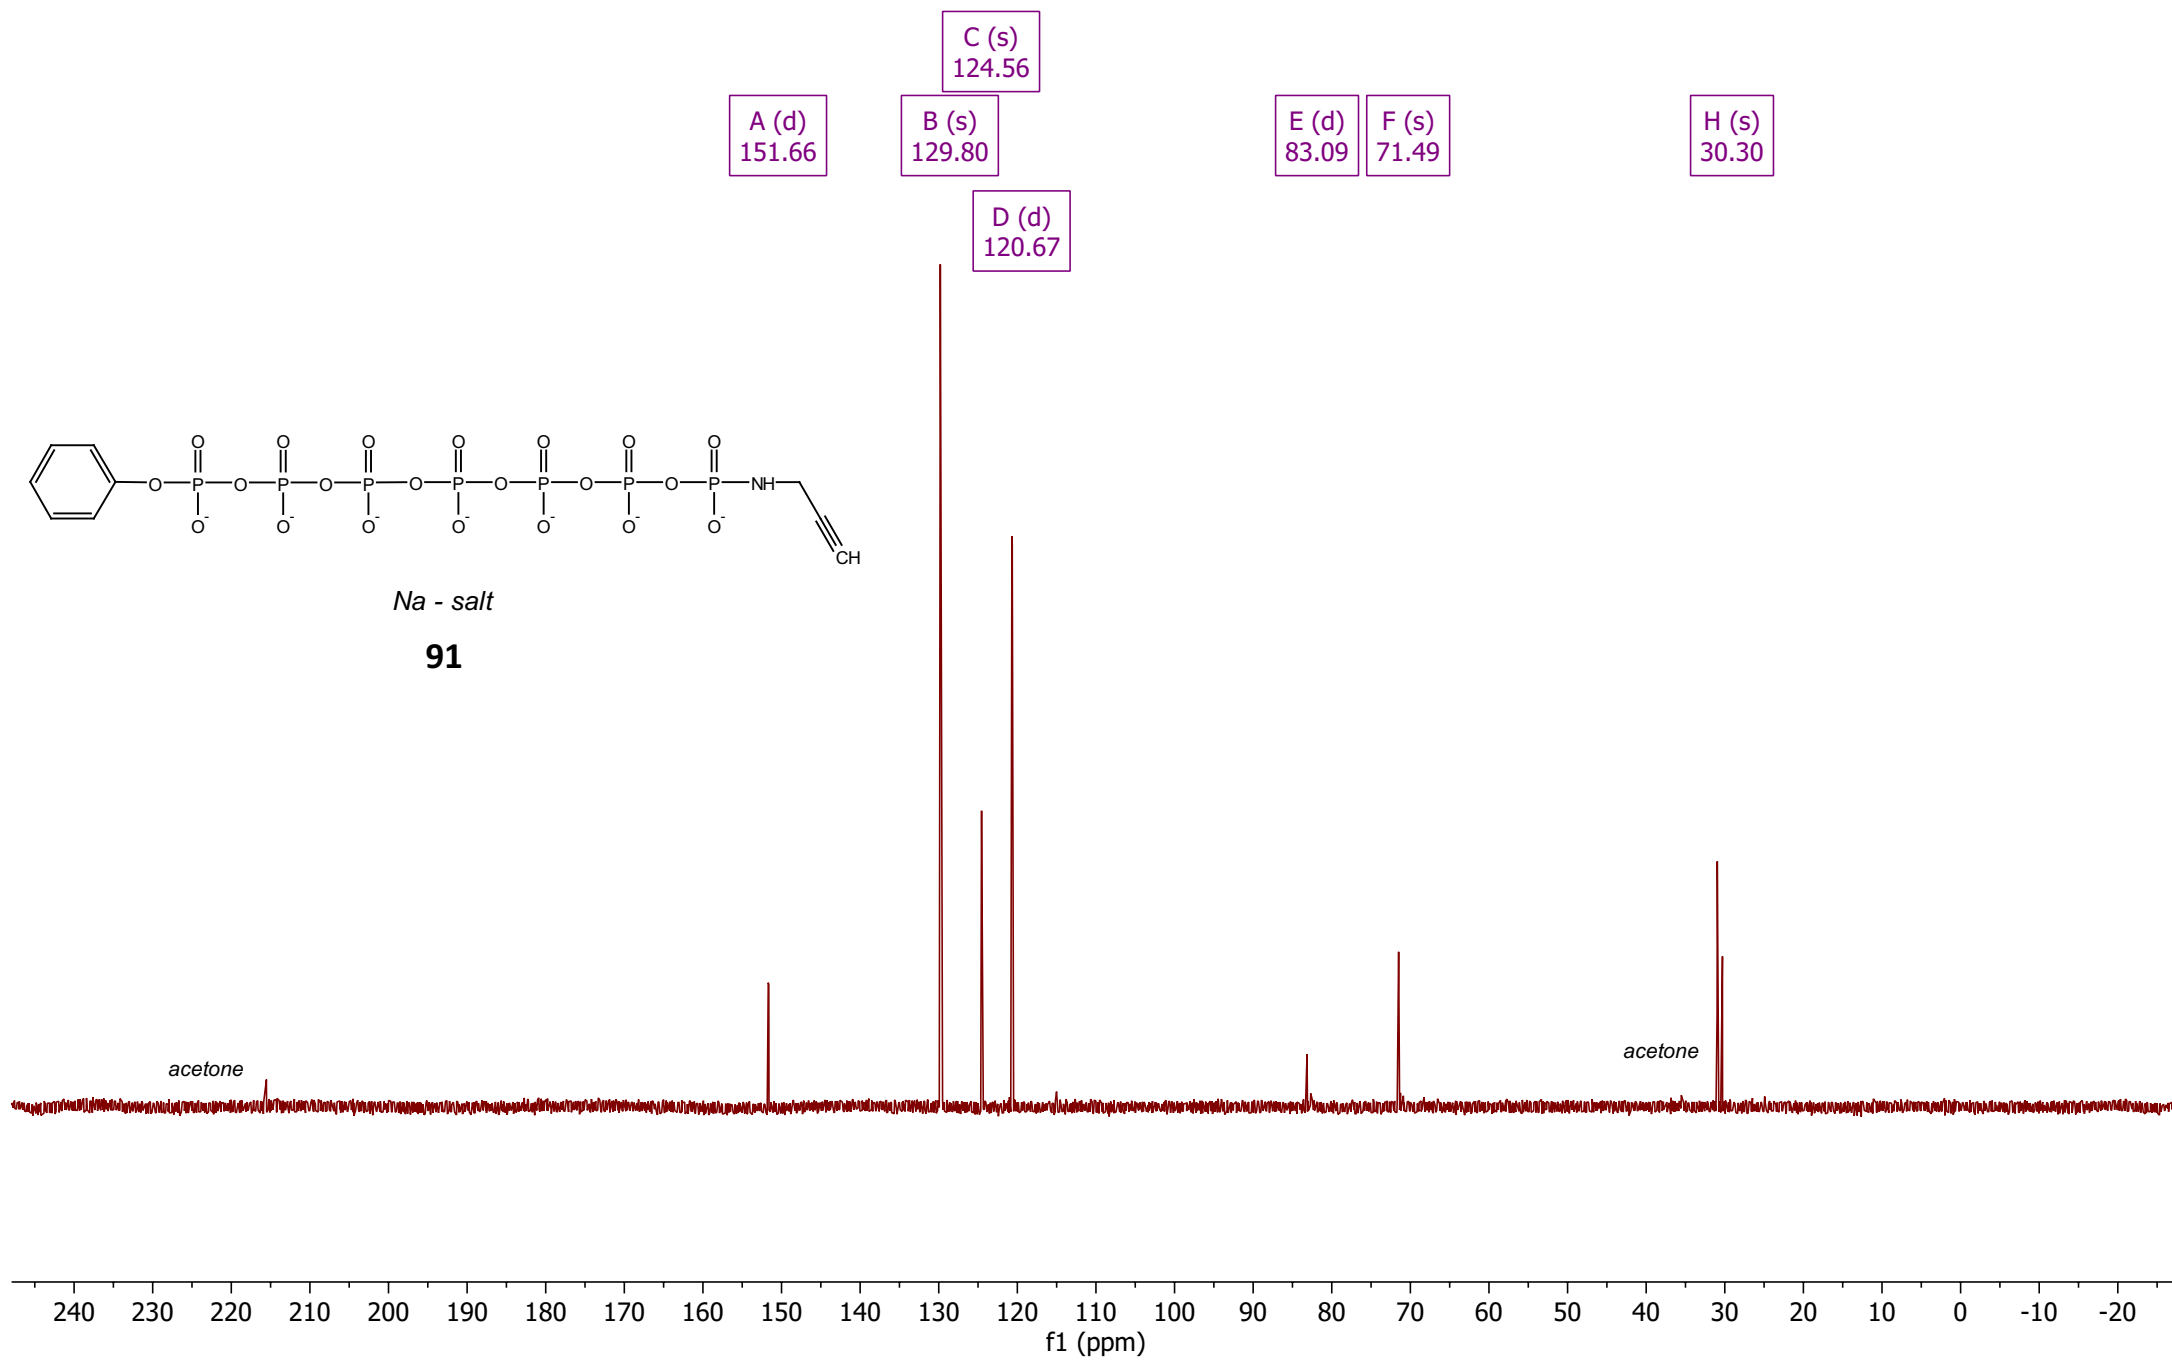

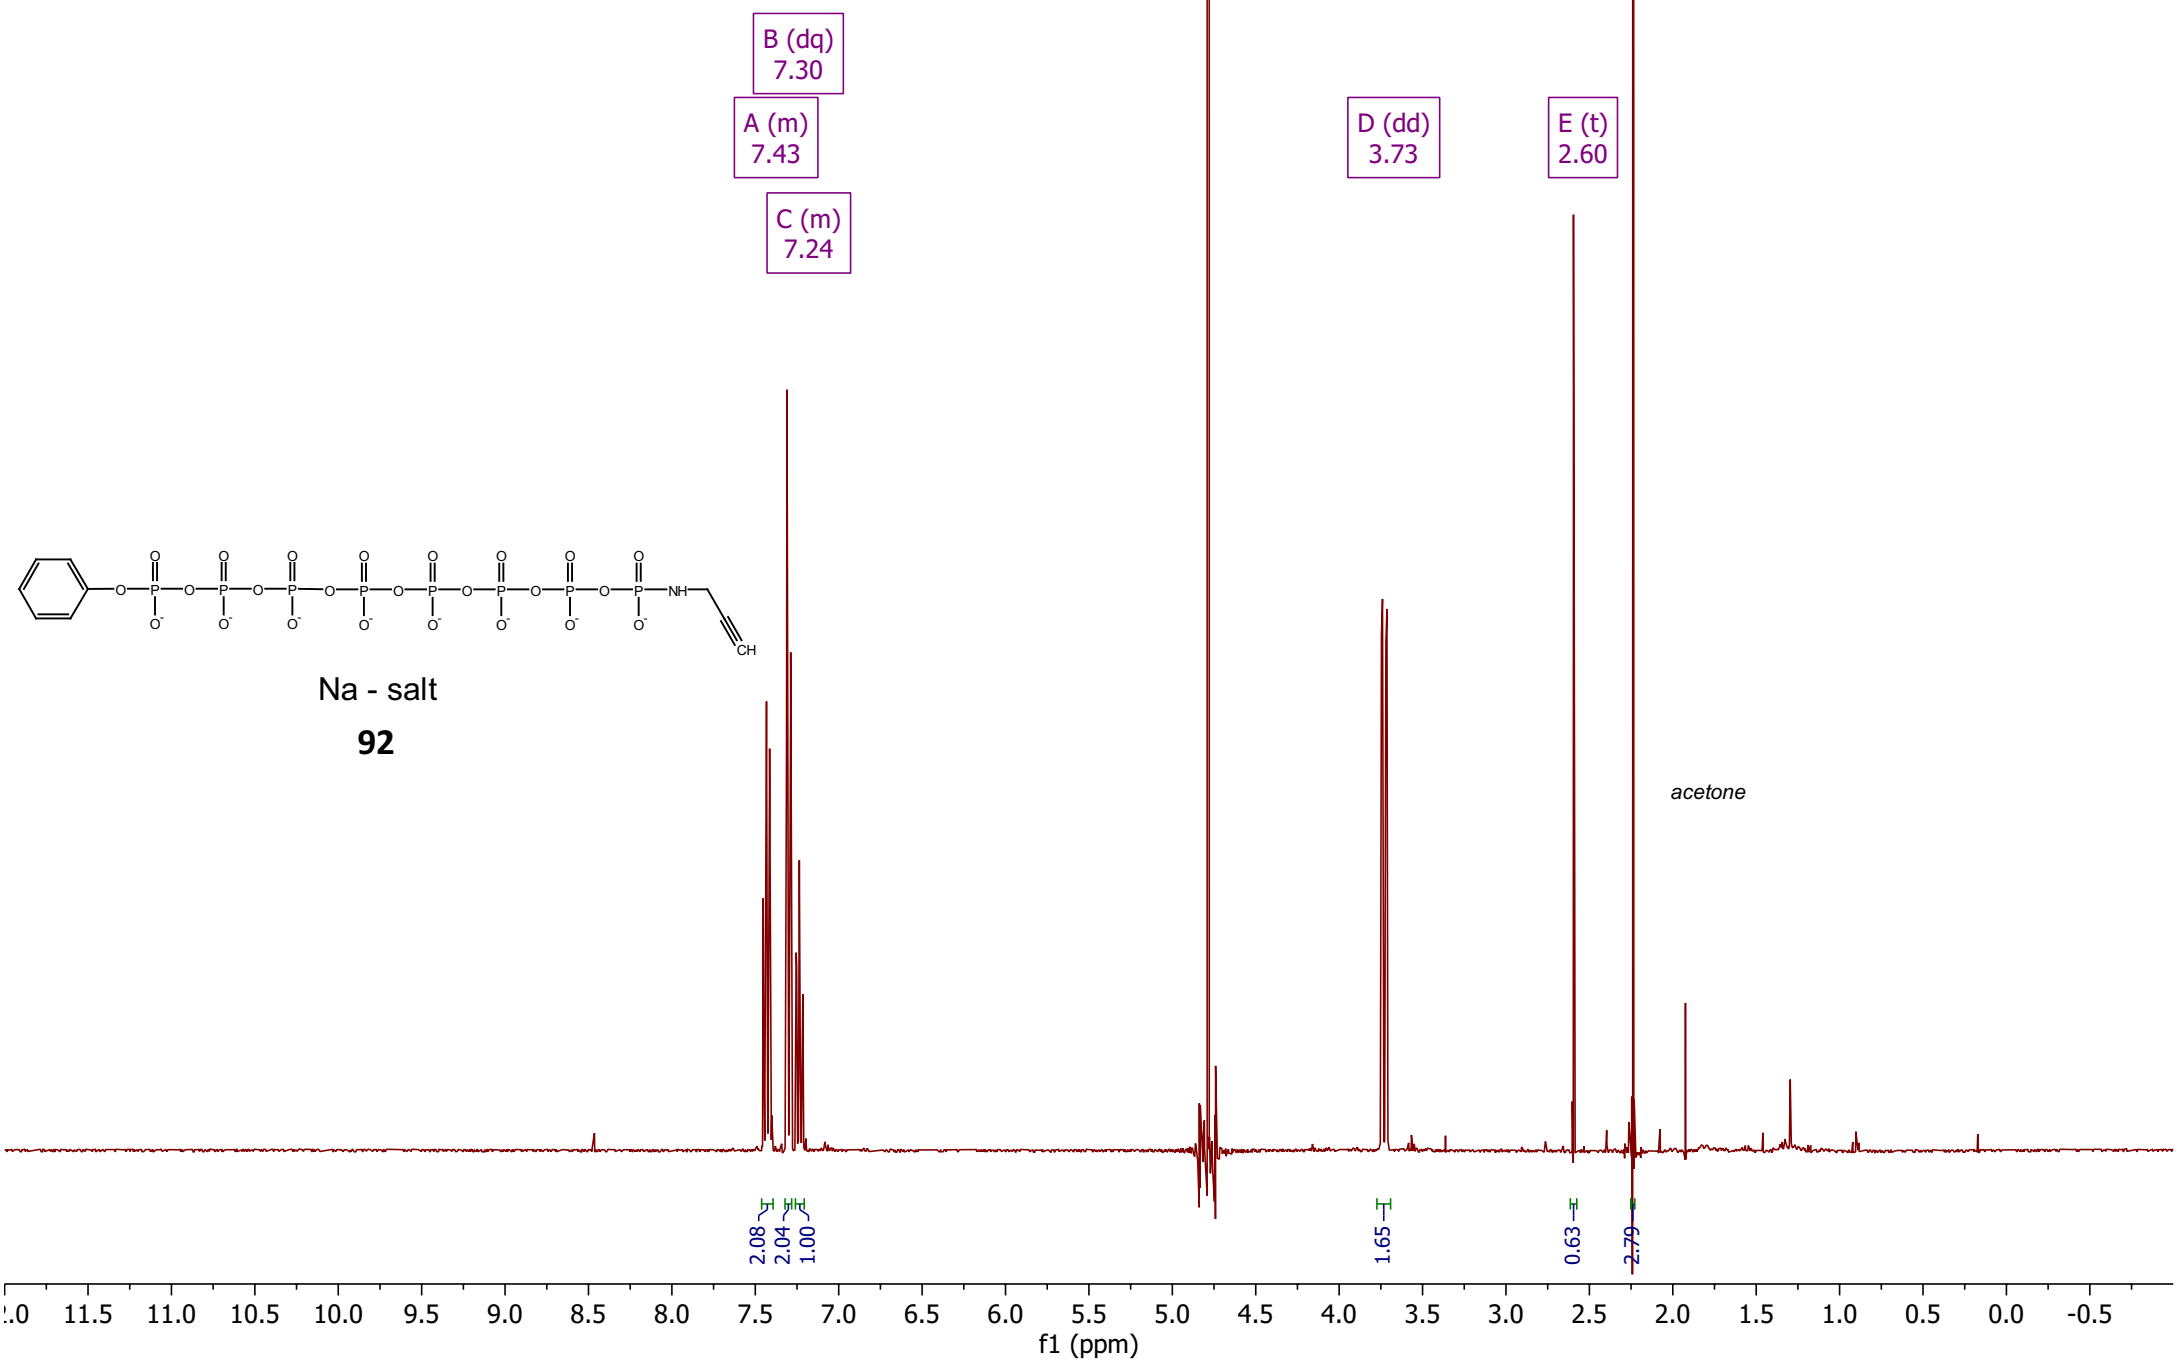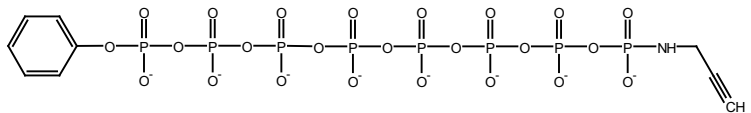

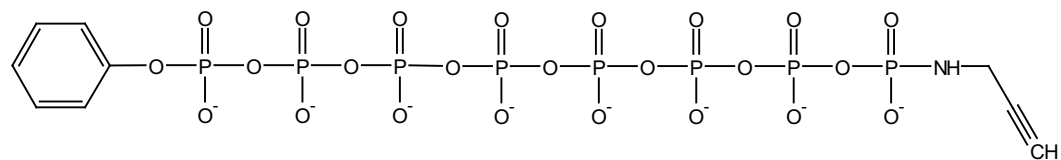

Na - salt  
**92**

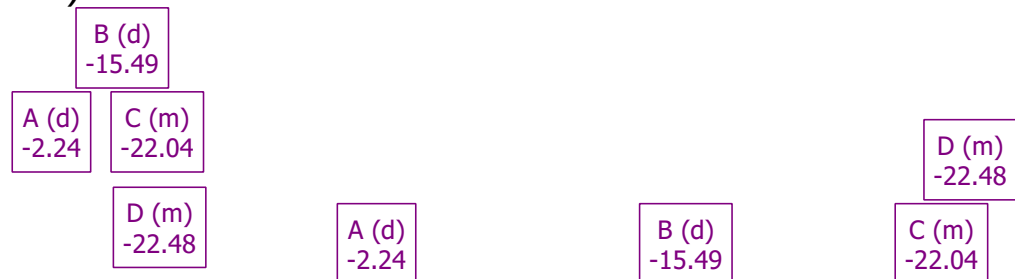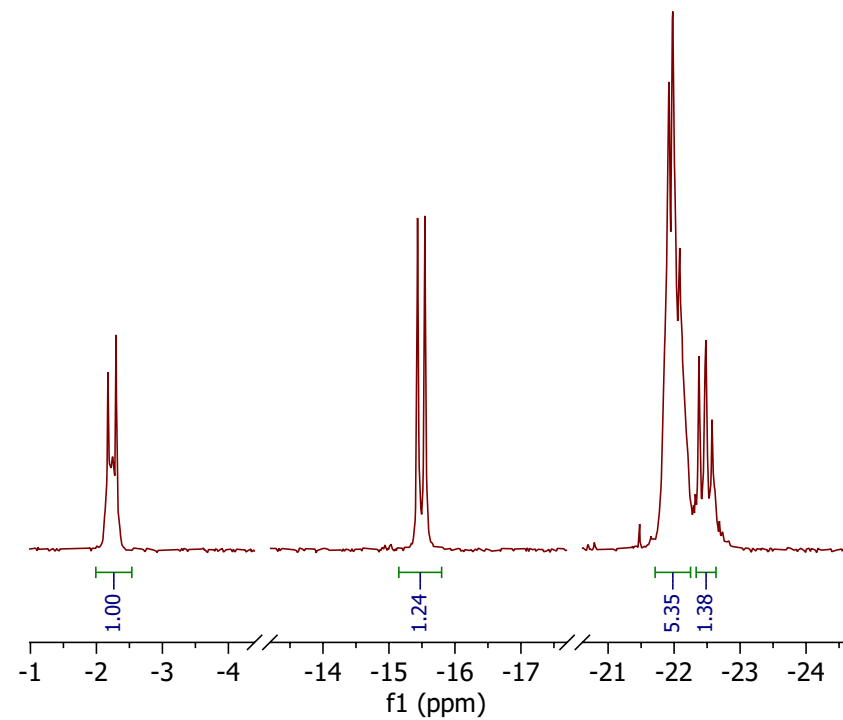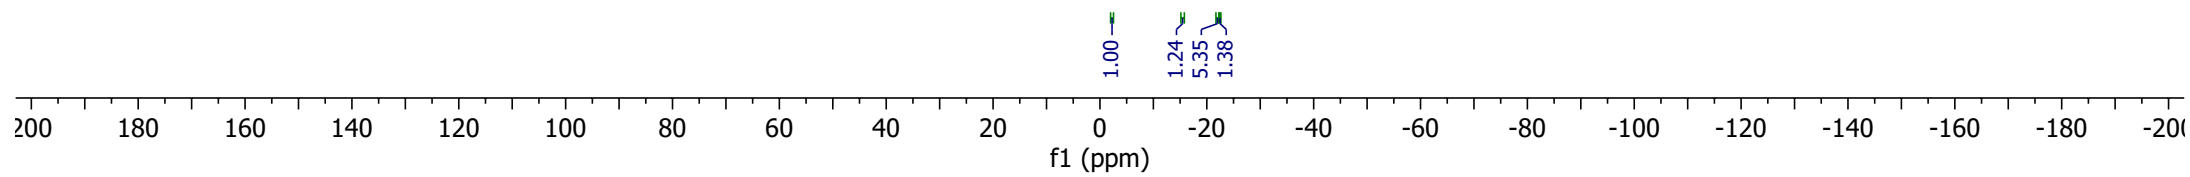

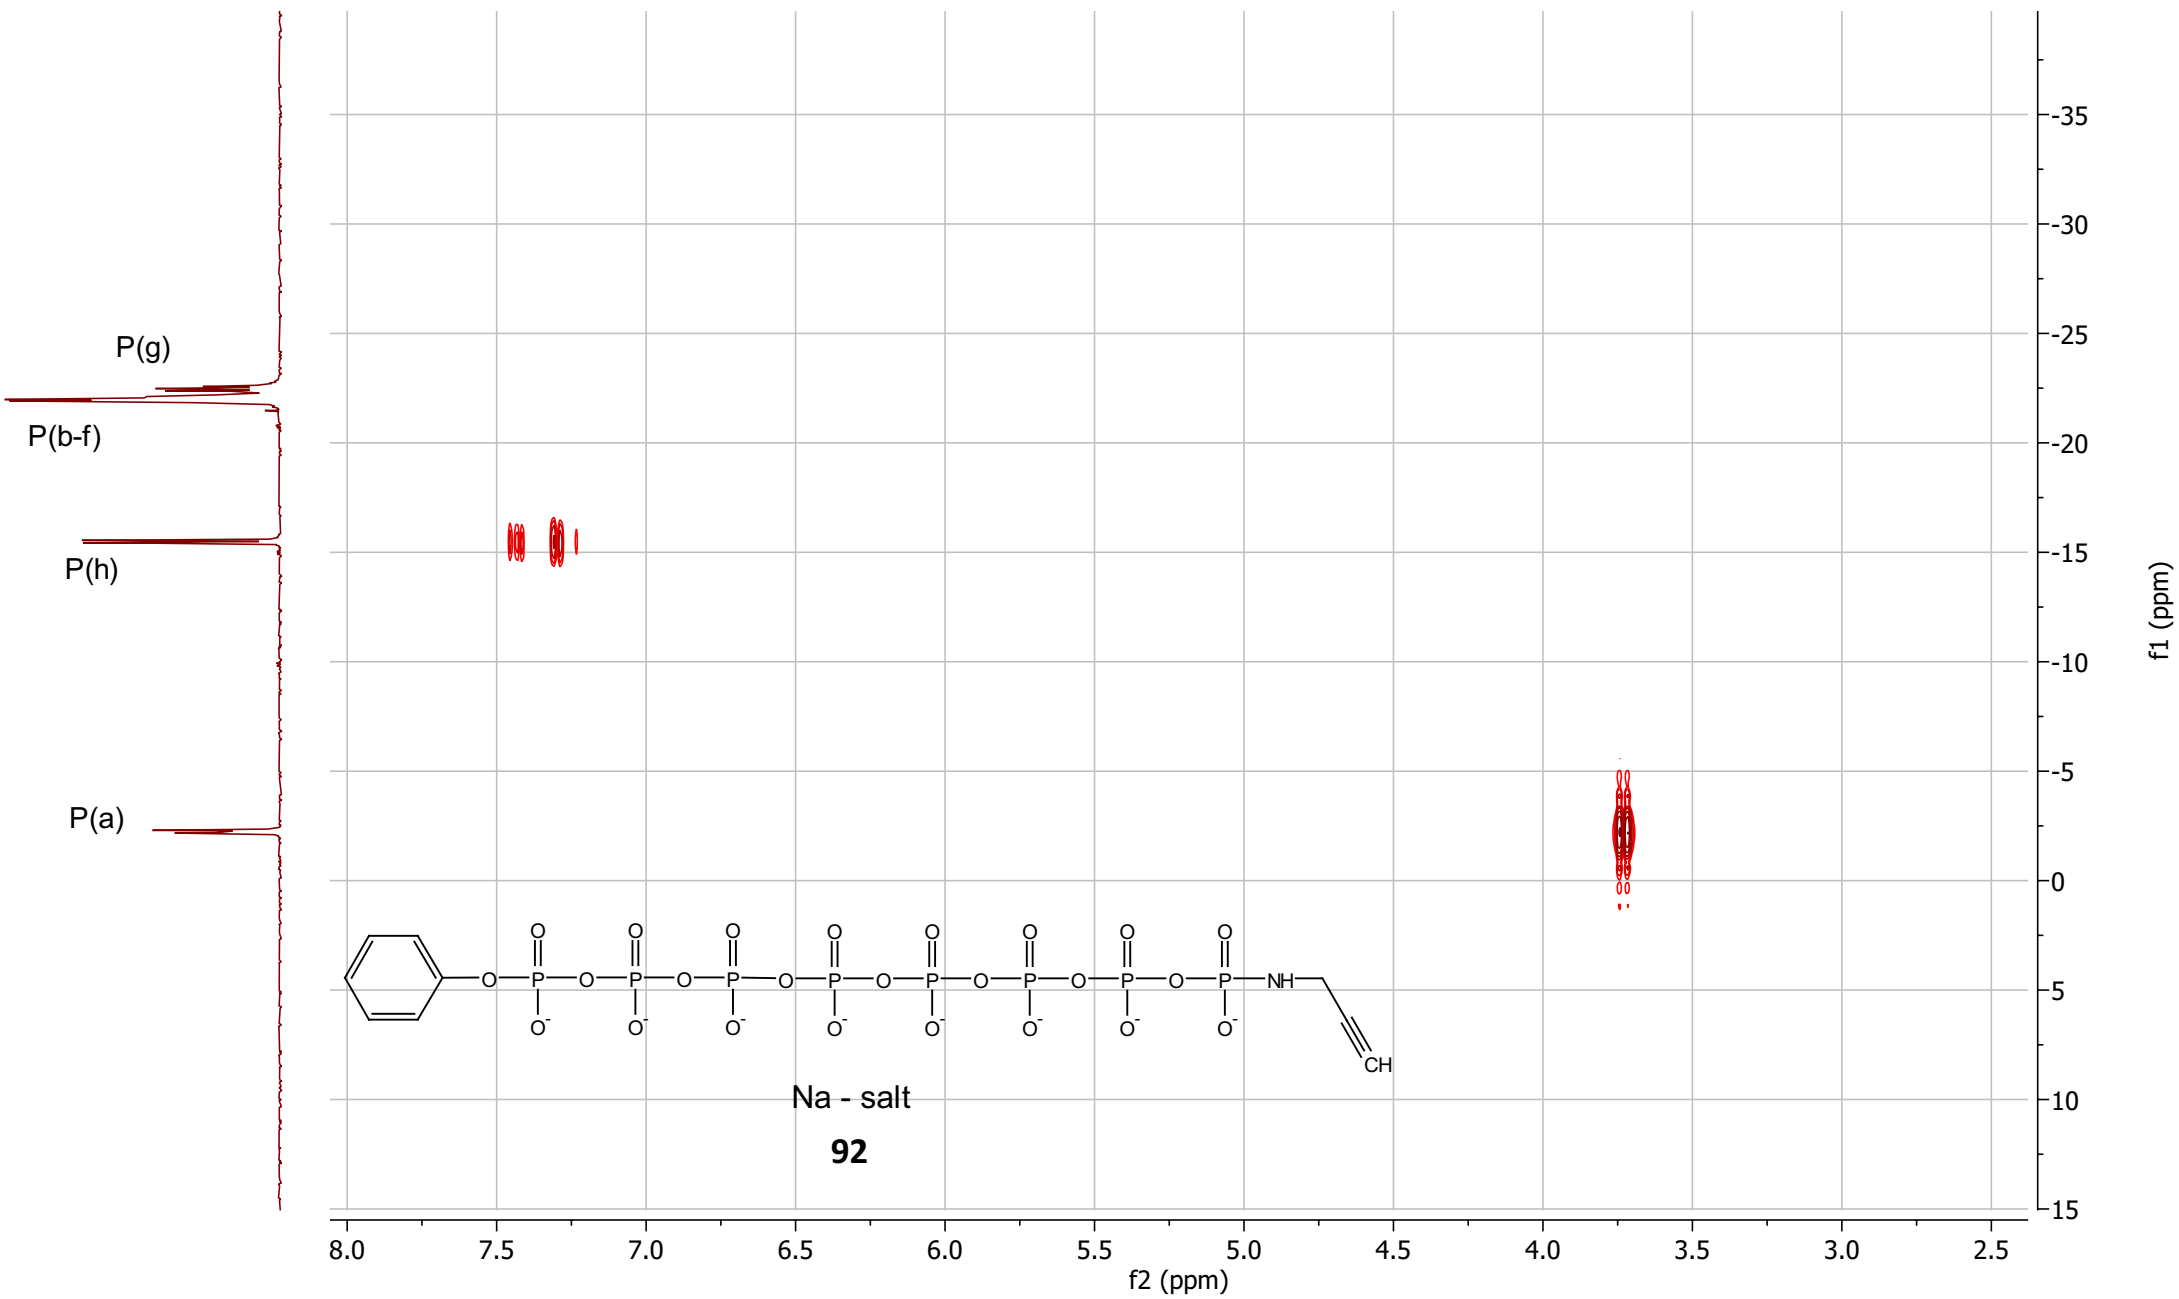



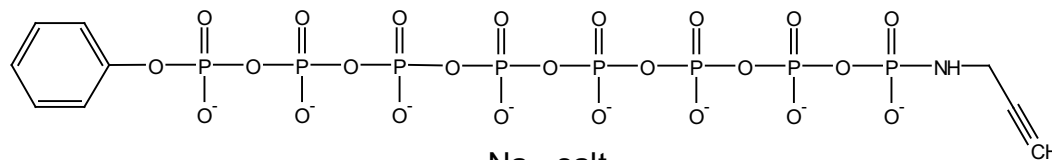

**92**

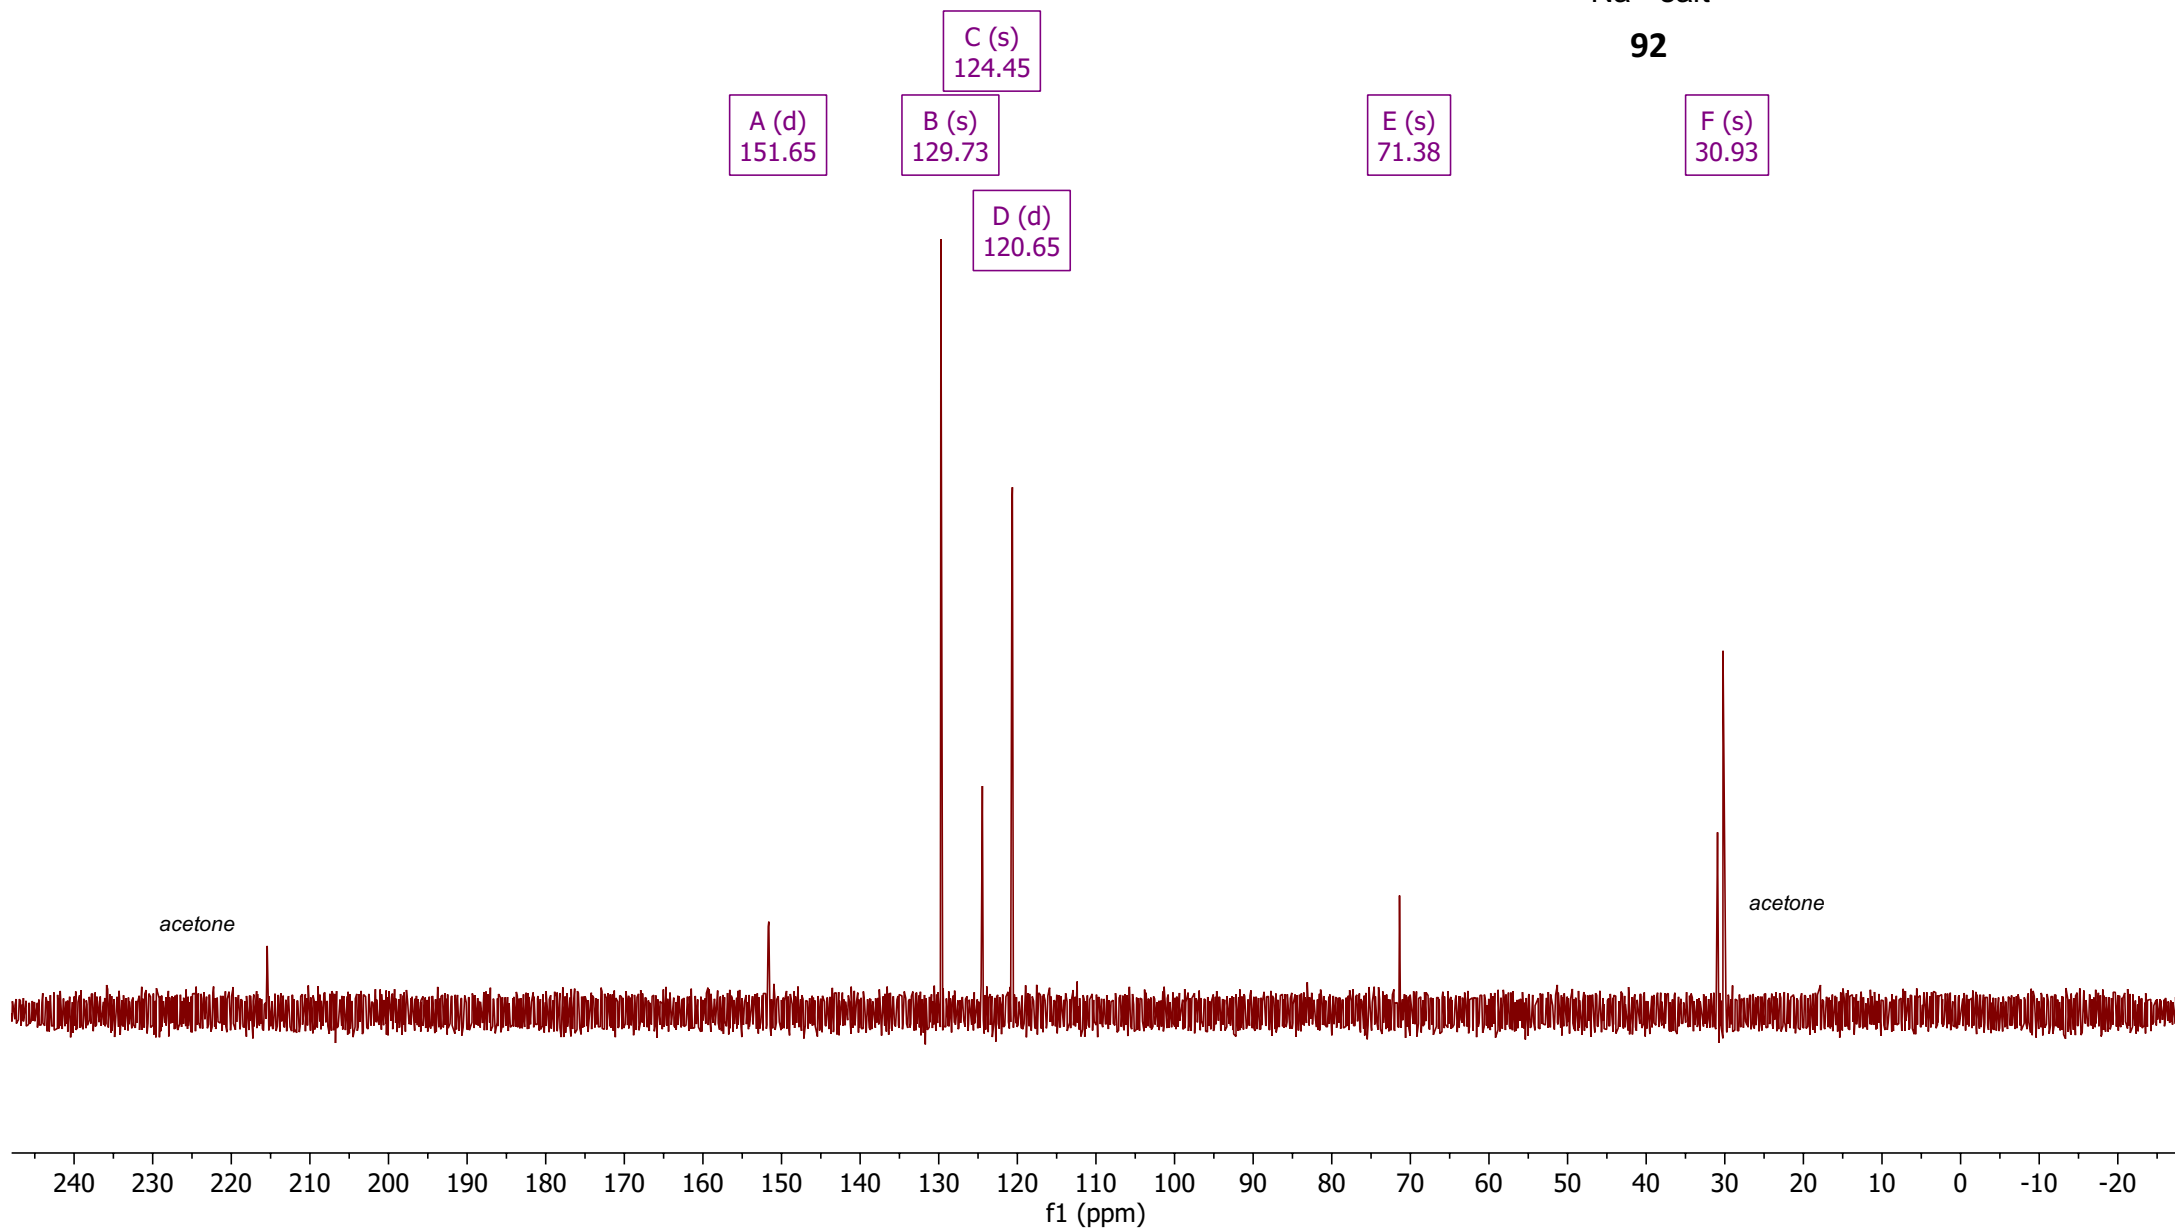

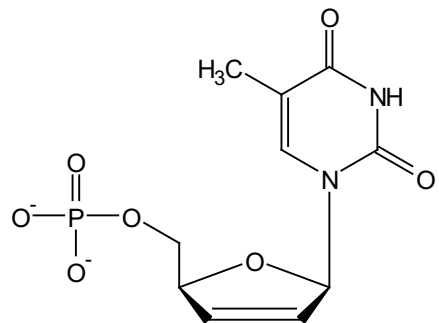

mixed piperidinium / TBA - salt

**SI-5**

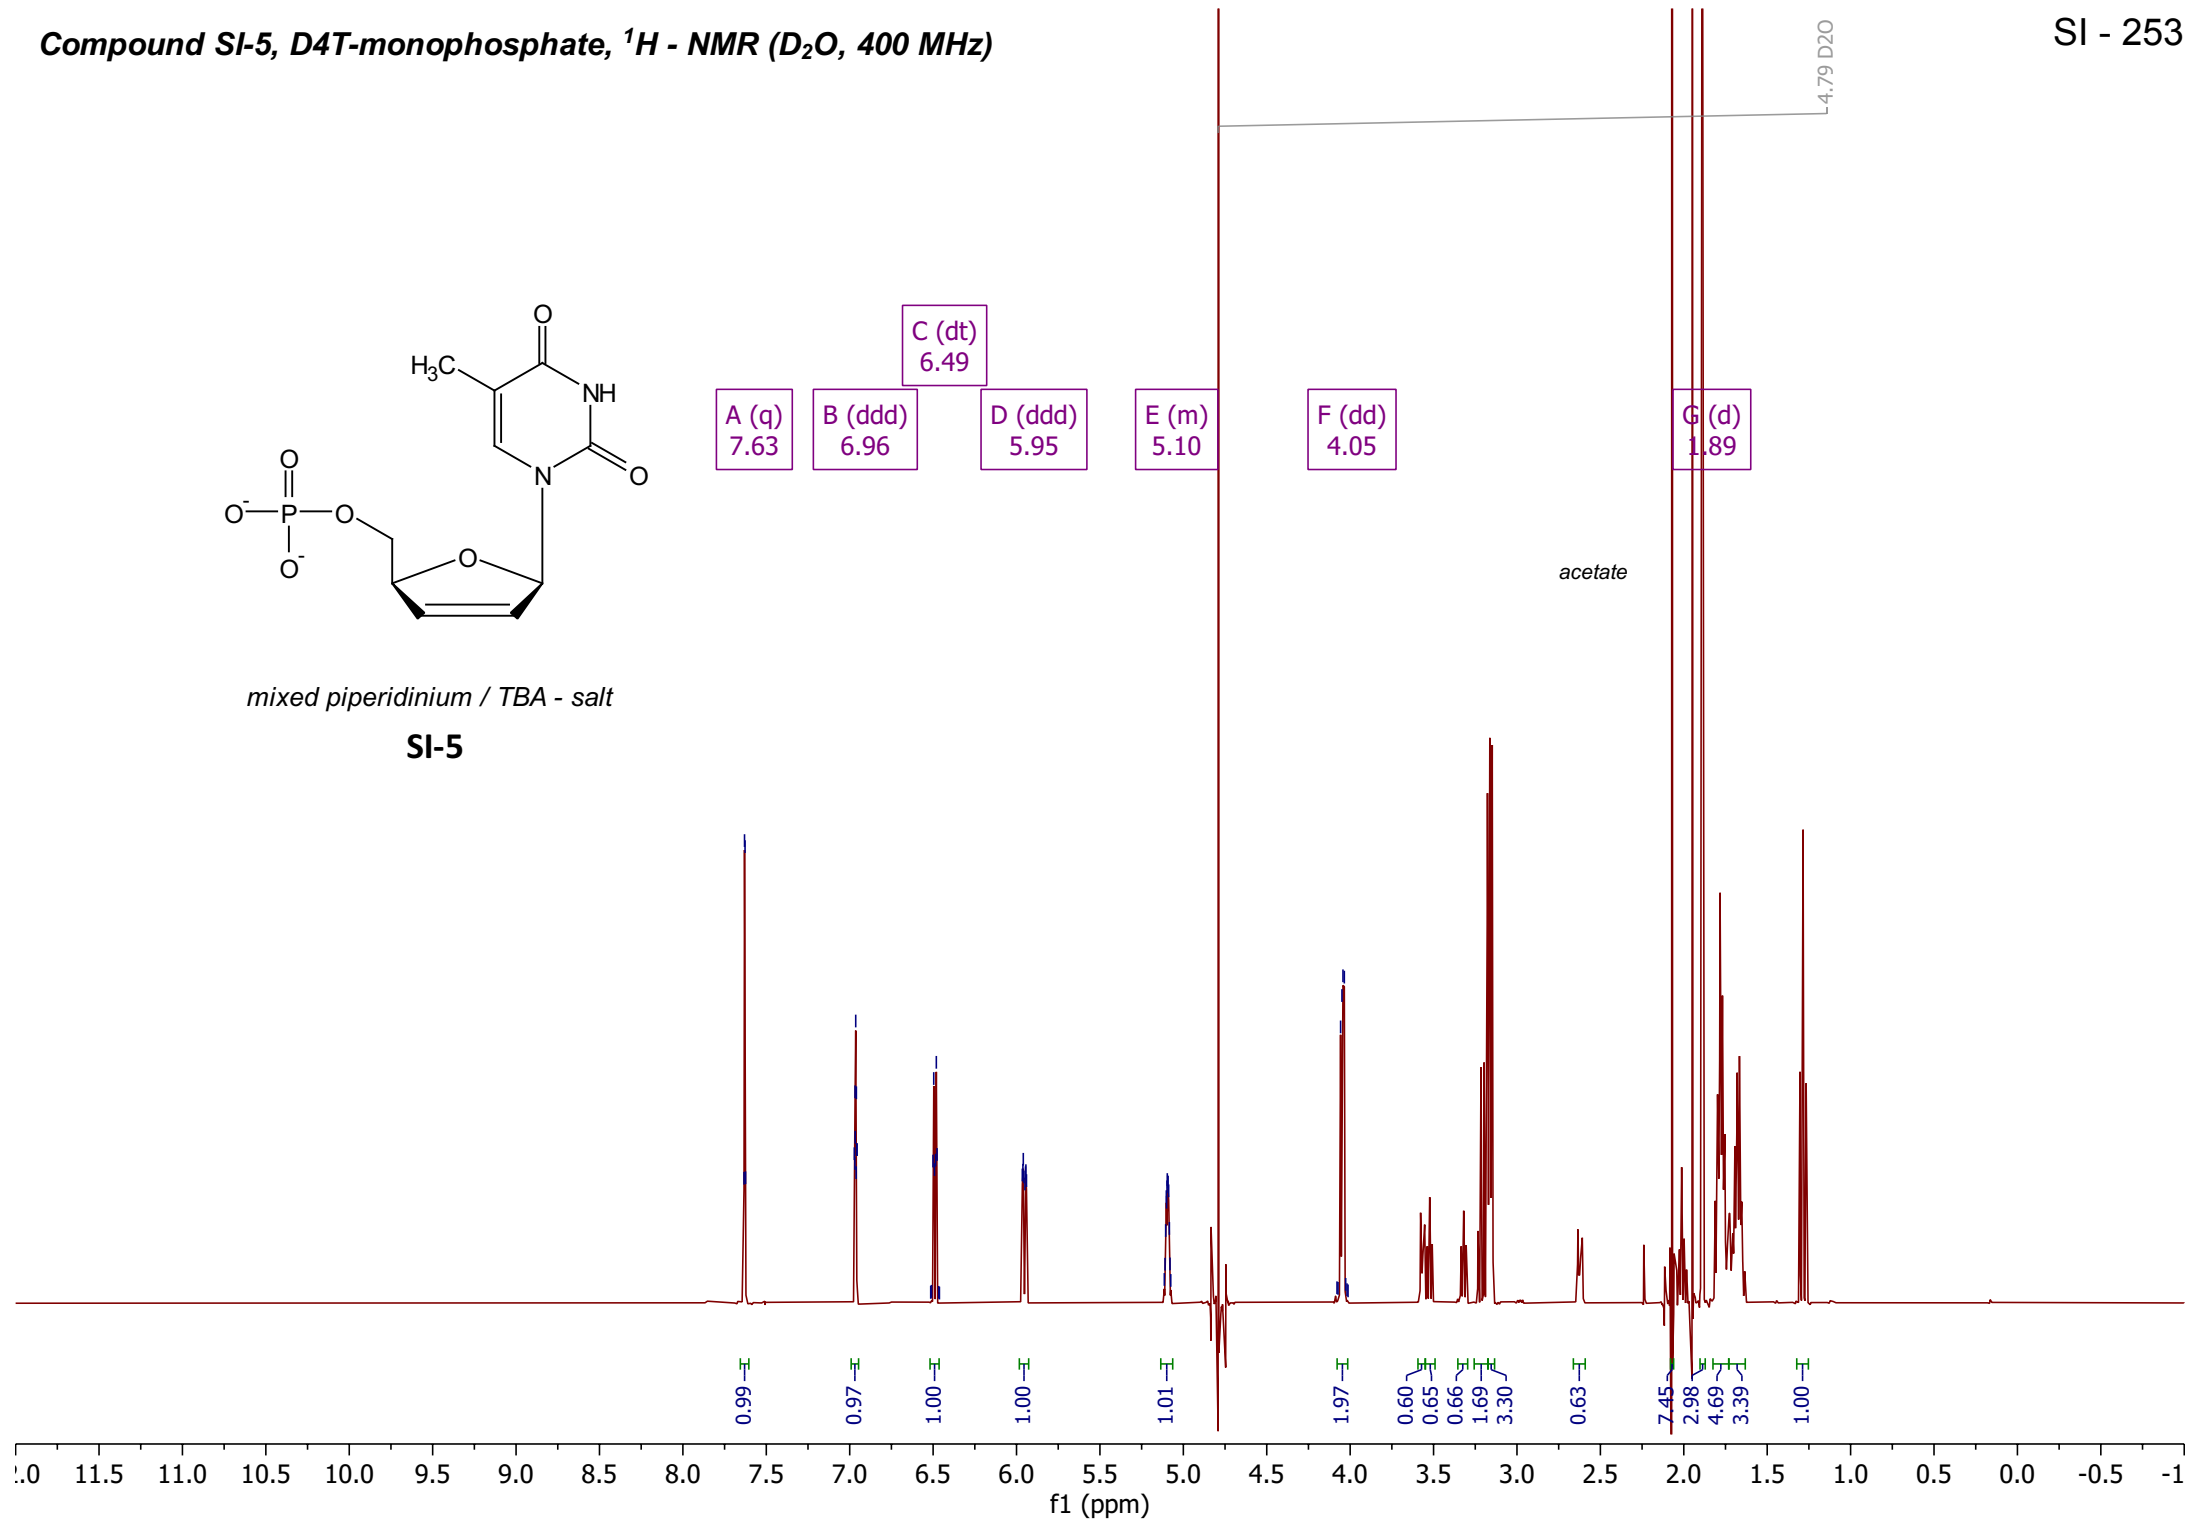



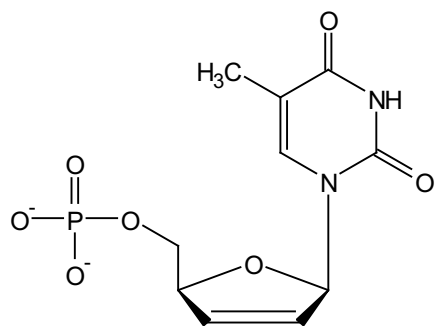

*mixed piperidinium / TBA - salt*

**SI-5**

A (s)  
0.41

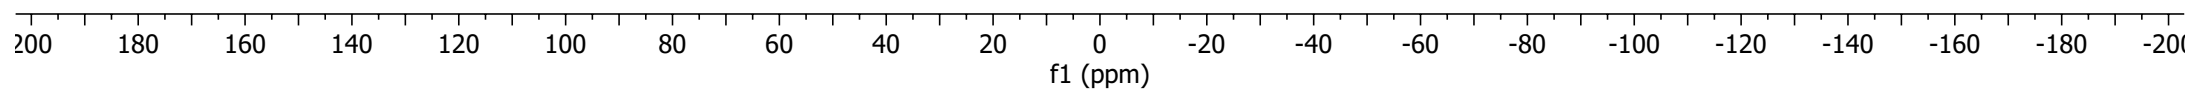

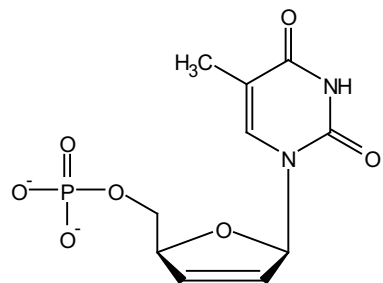

*mixed piperidinium / TBA - salt*

**SI-5**

A (t)  
0.41

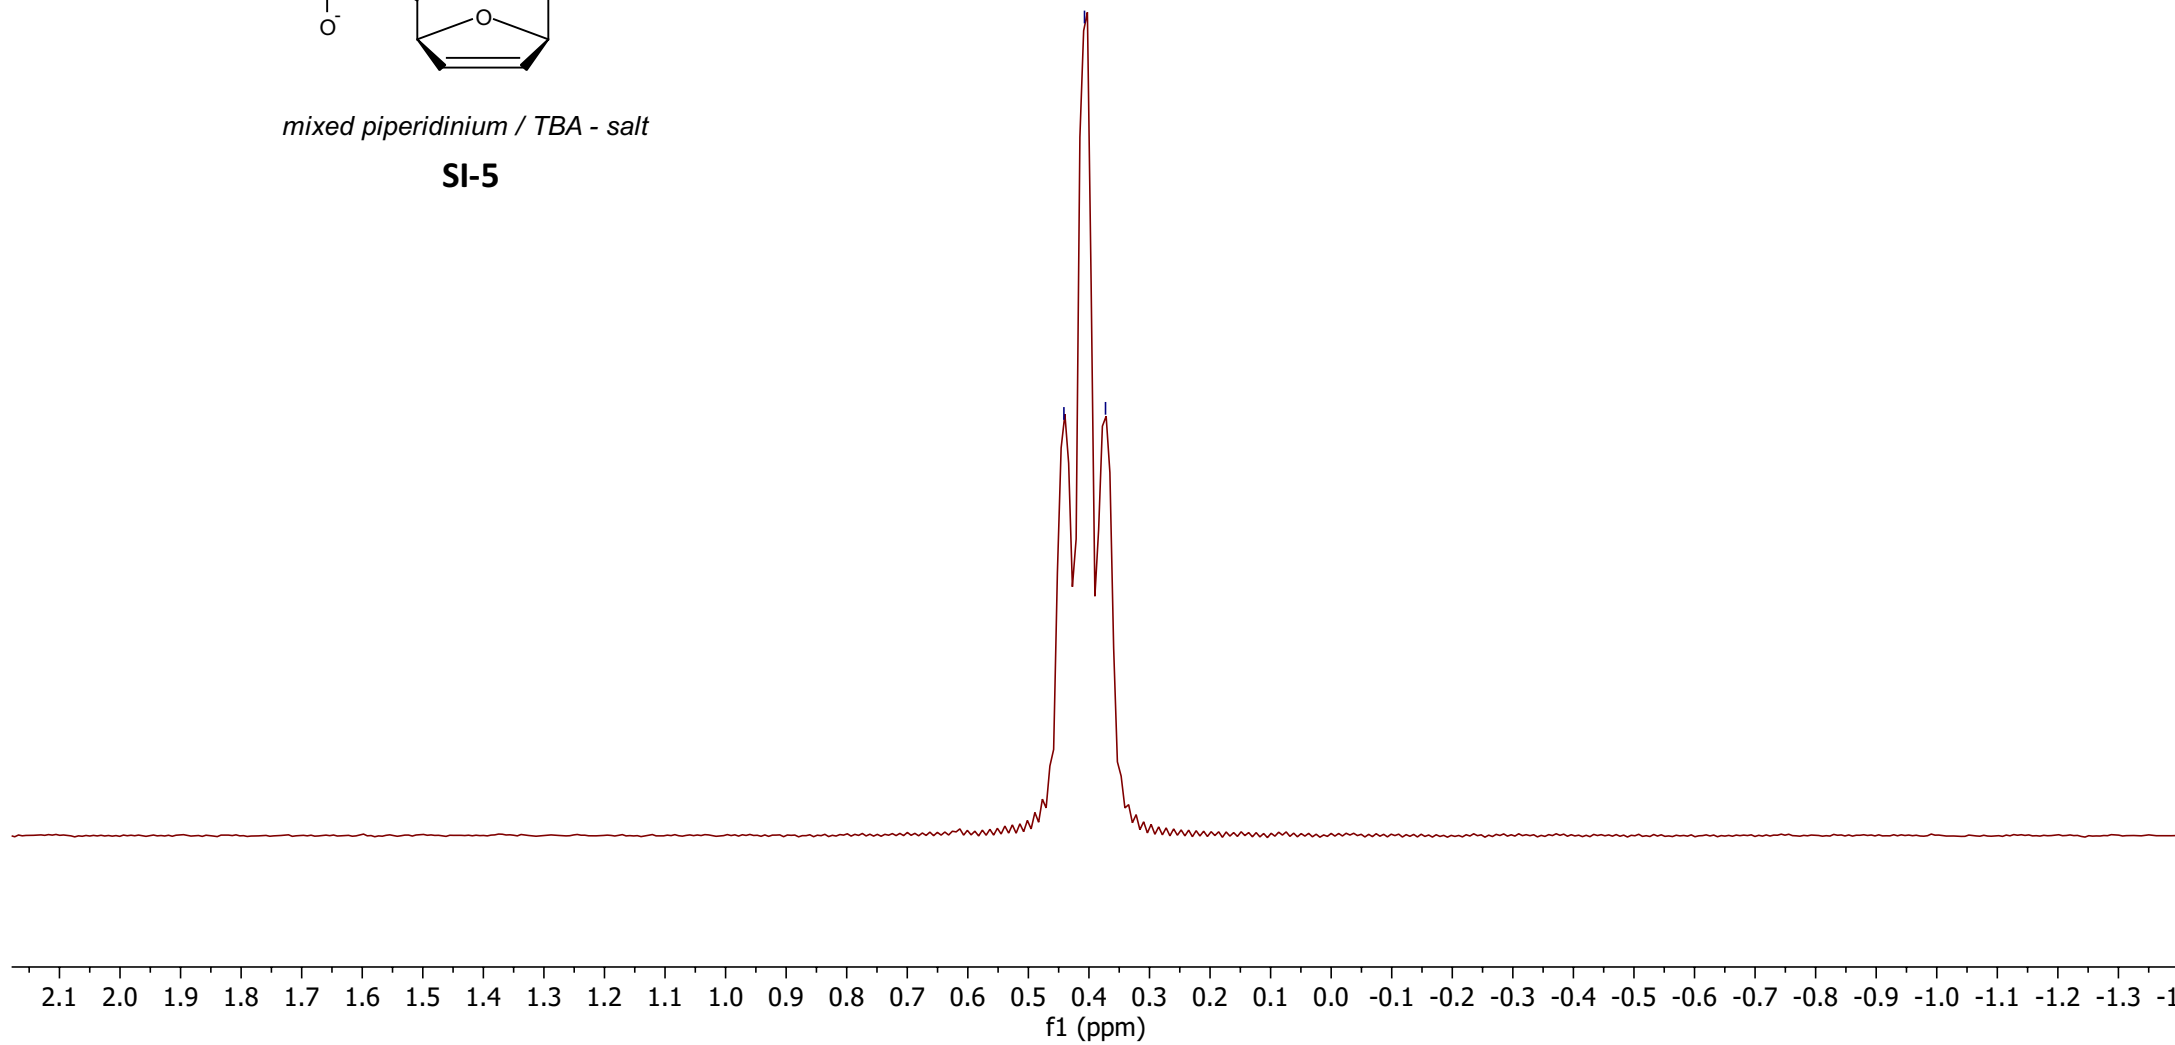

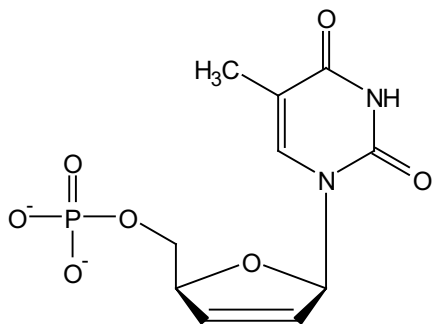

mixed piperidinium / TBA - salt

**SI-5**

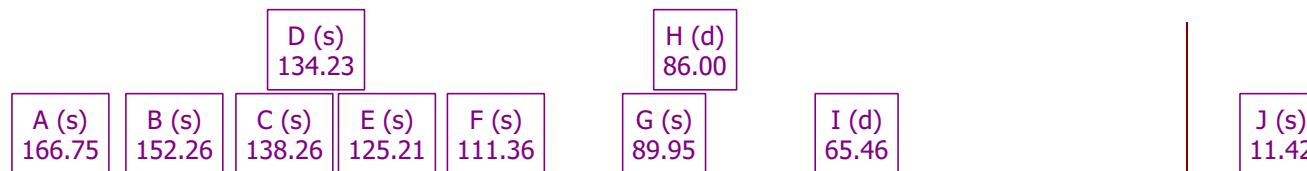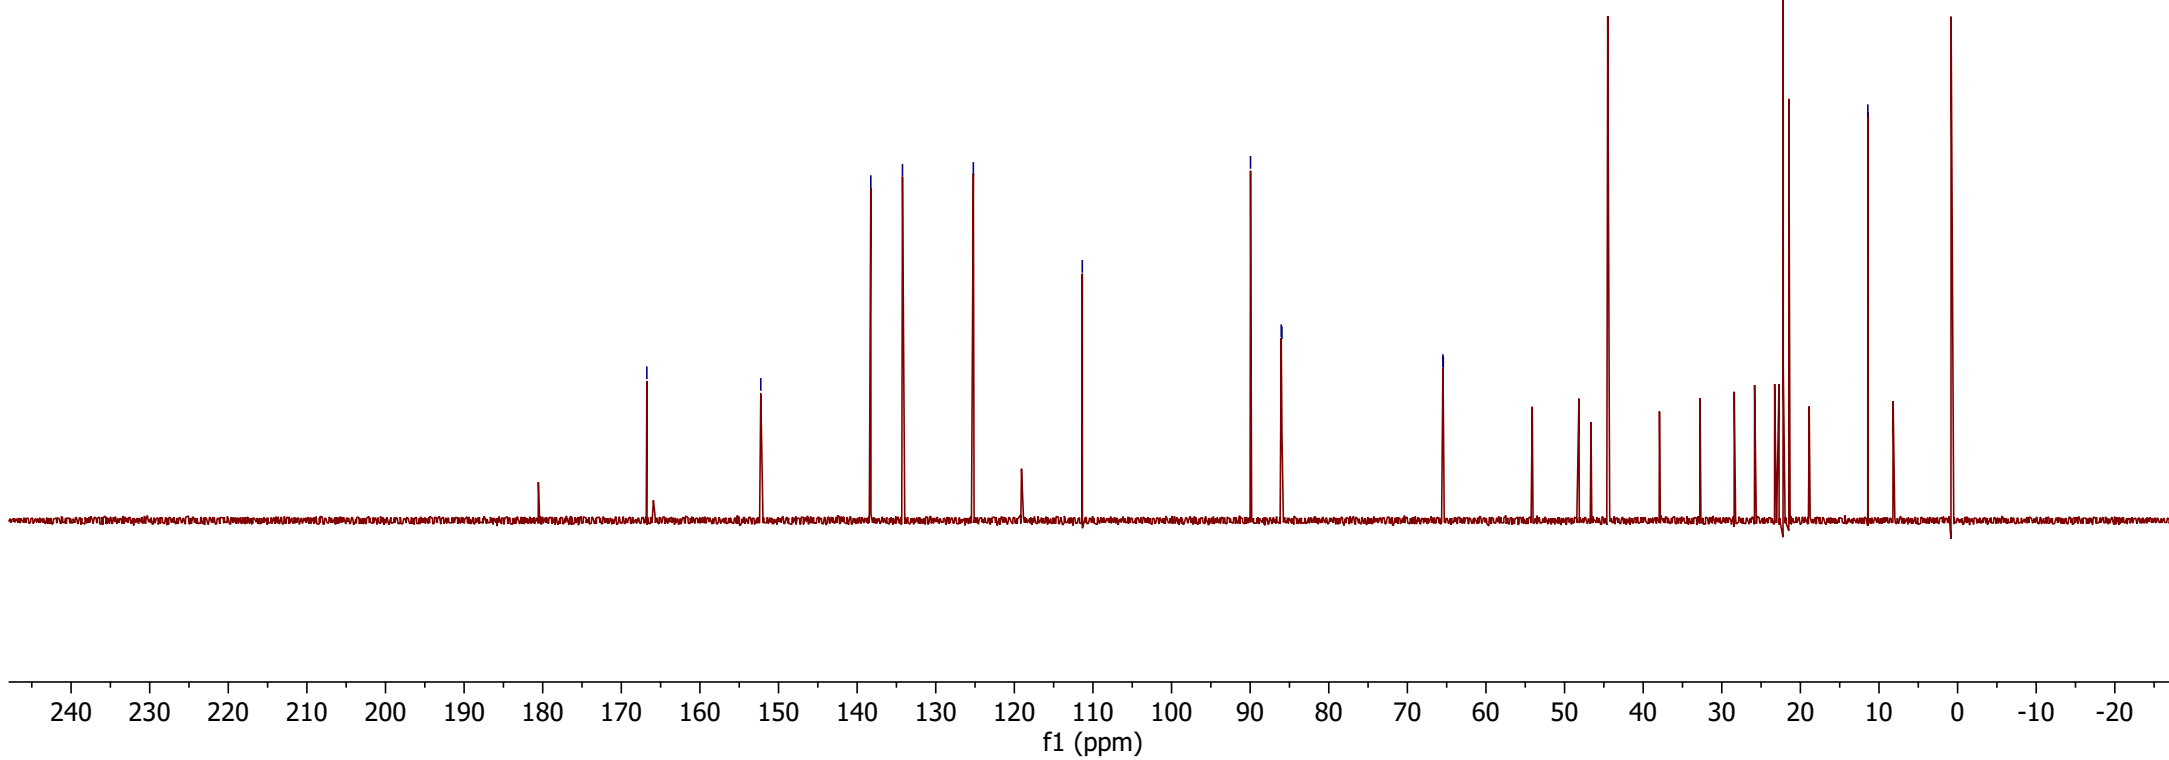

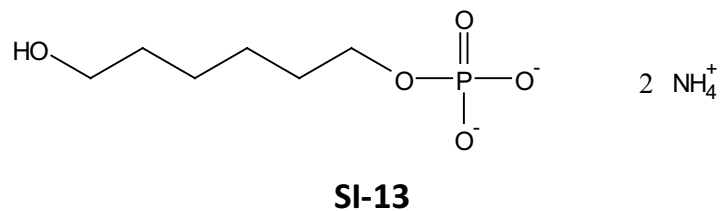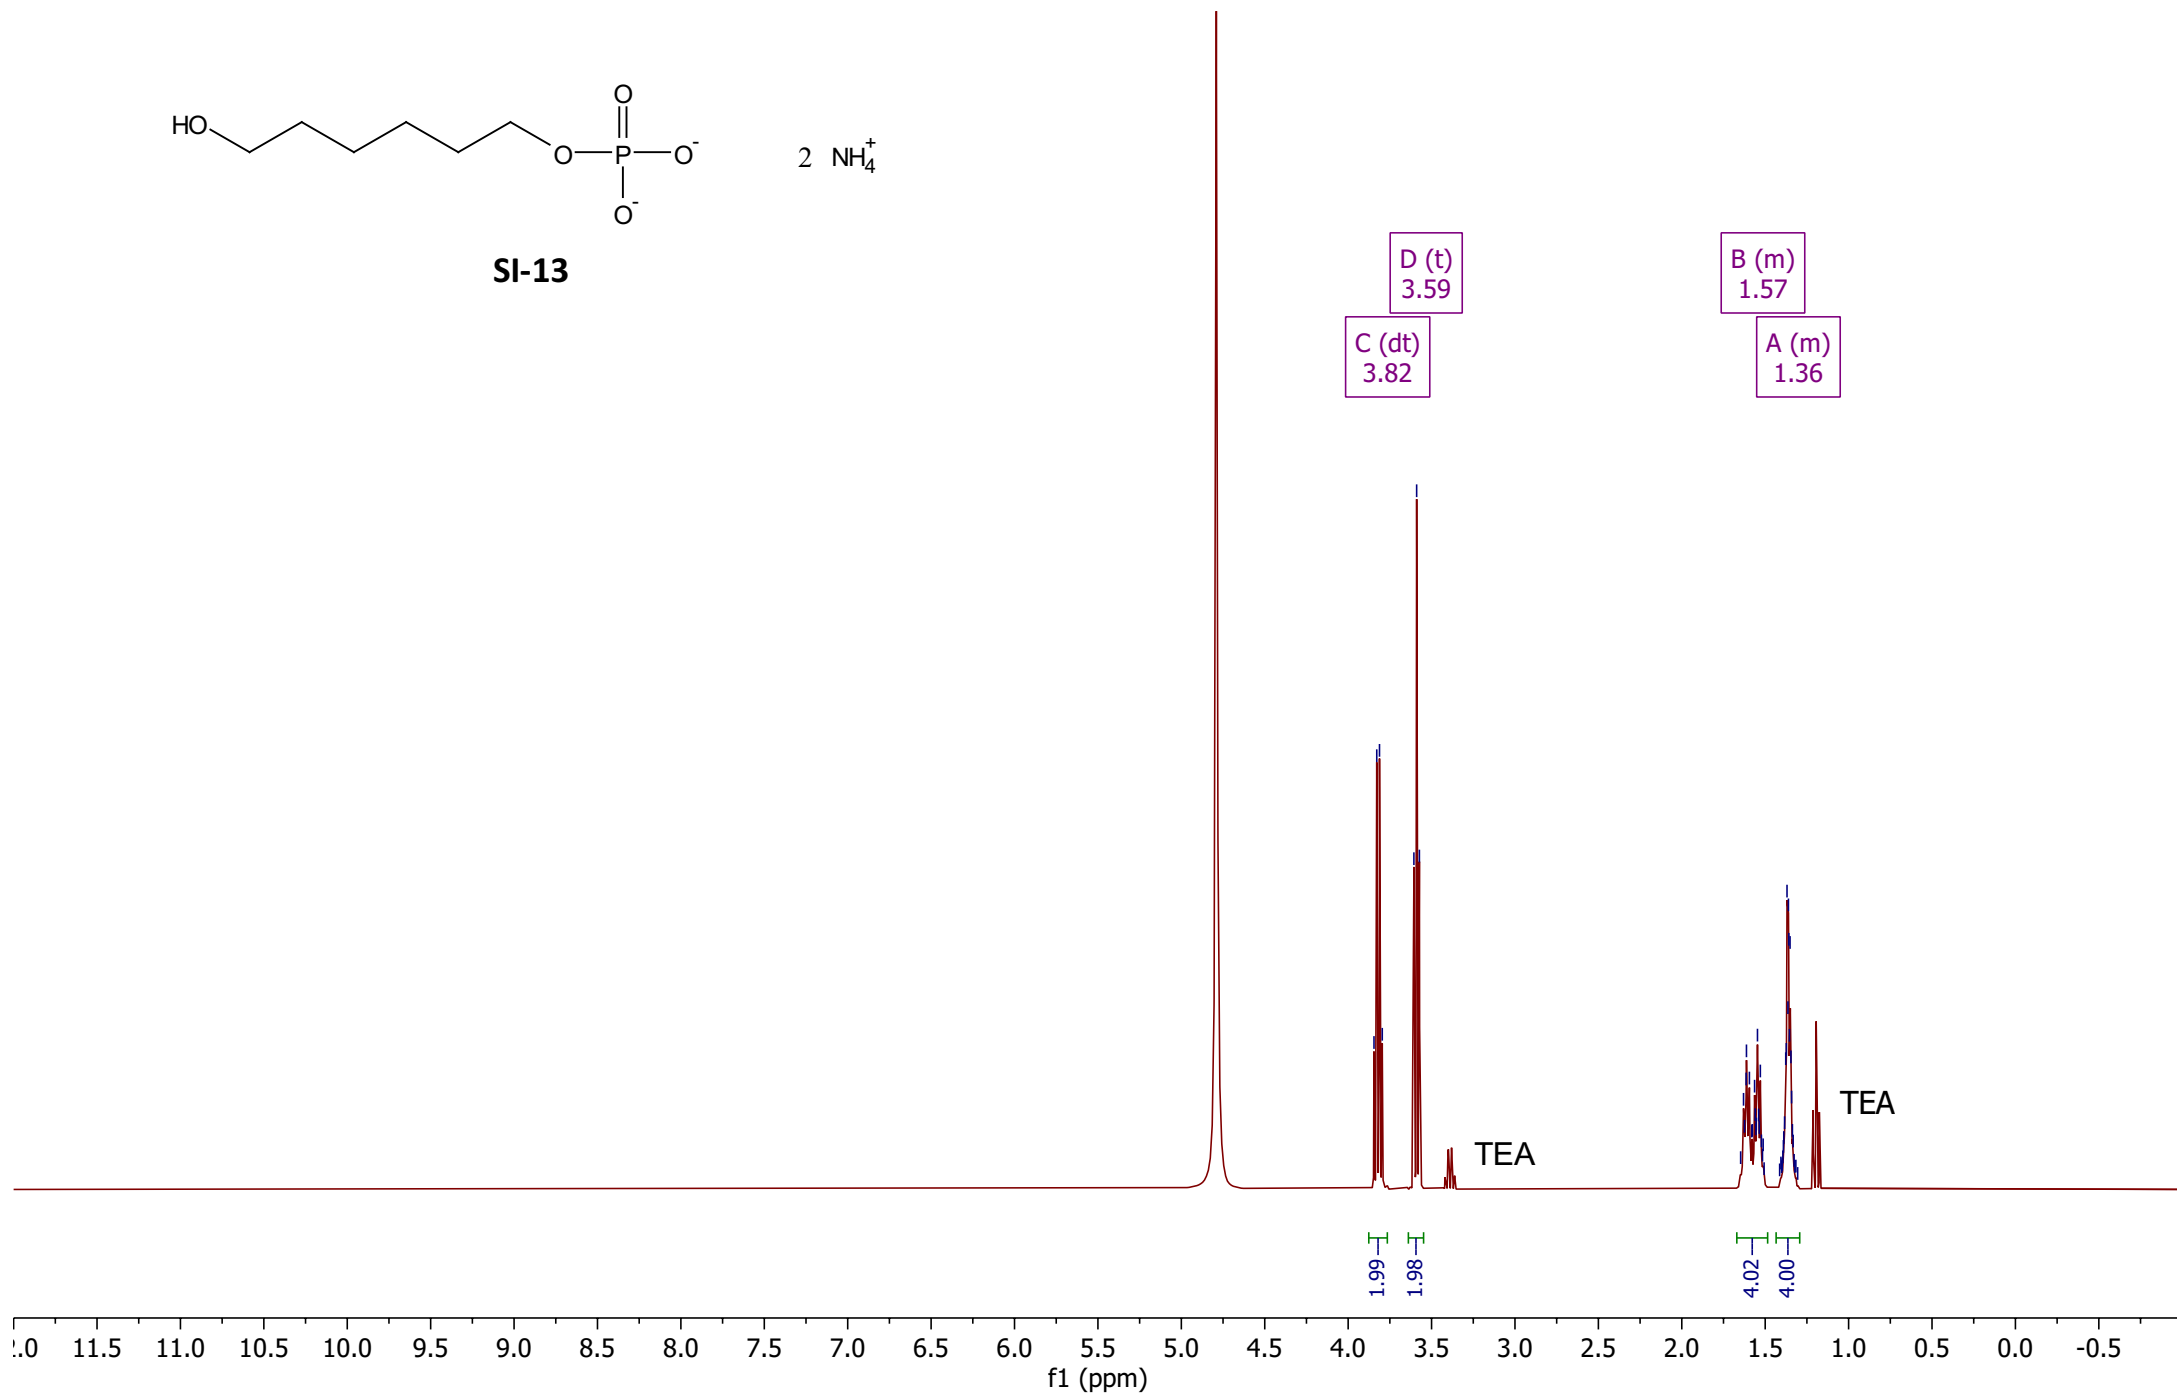

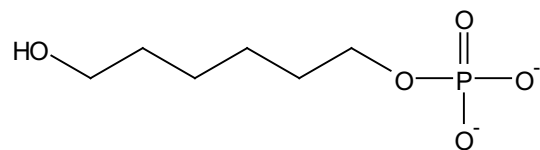

SI-13

2 NH<sub>4</sub><sup>+</sup>

A (s)  
1.34



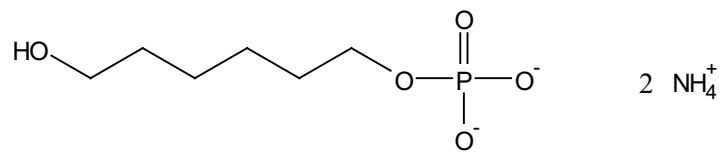

SI-13

A (t)  
1.34

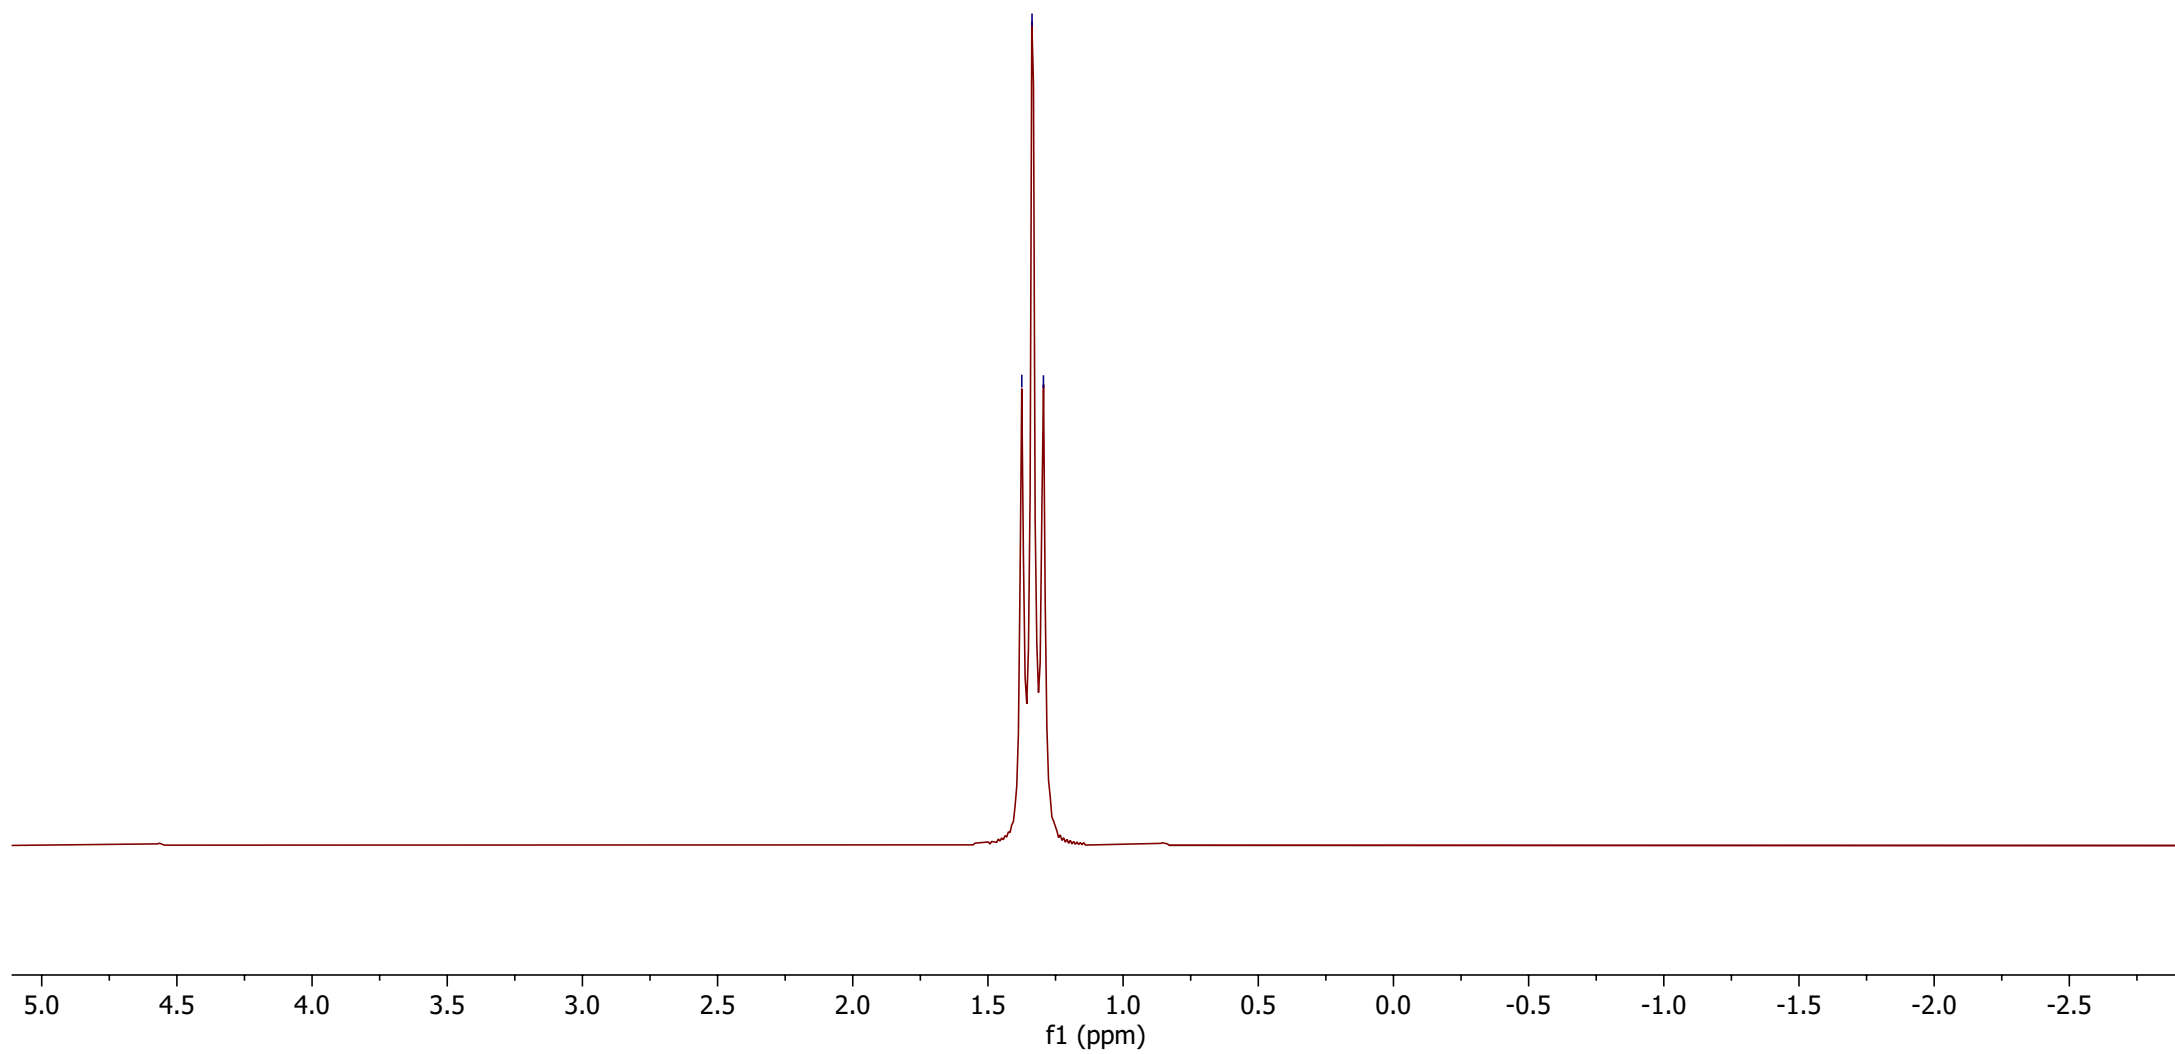

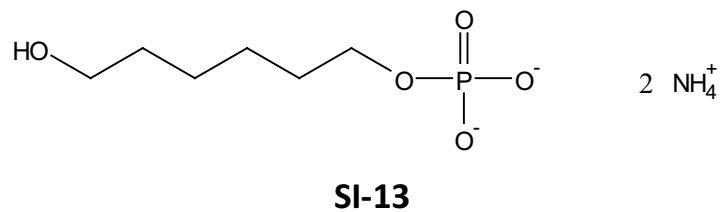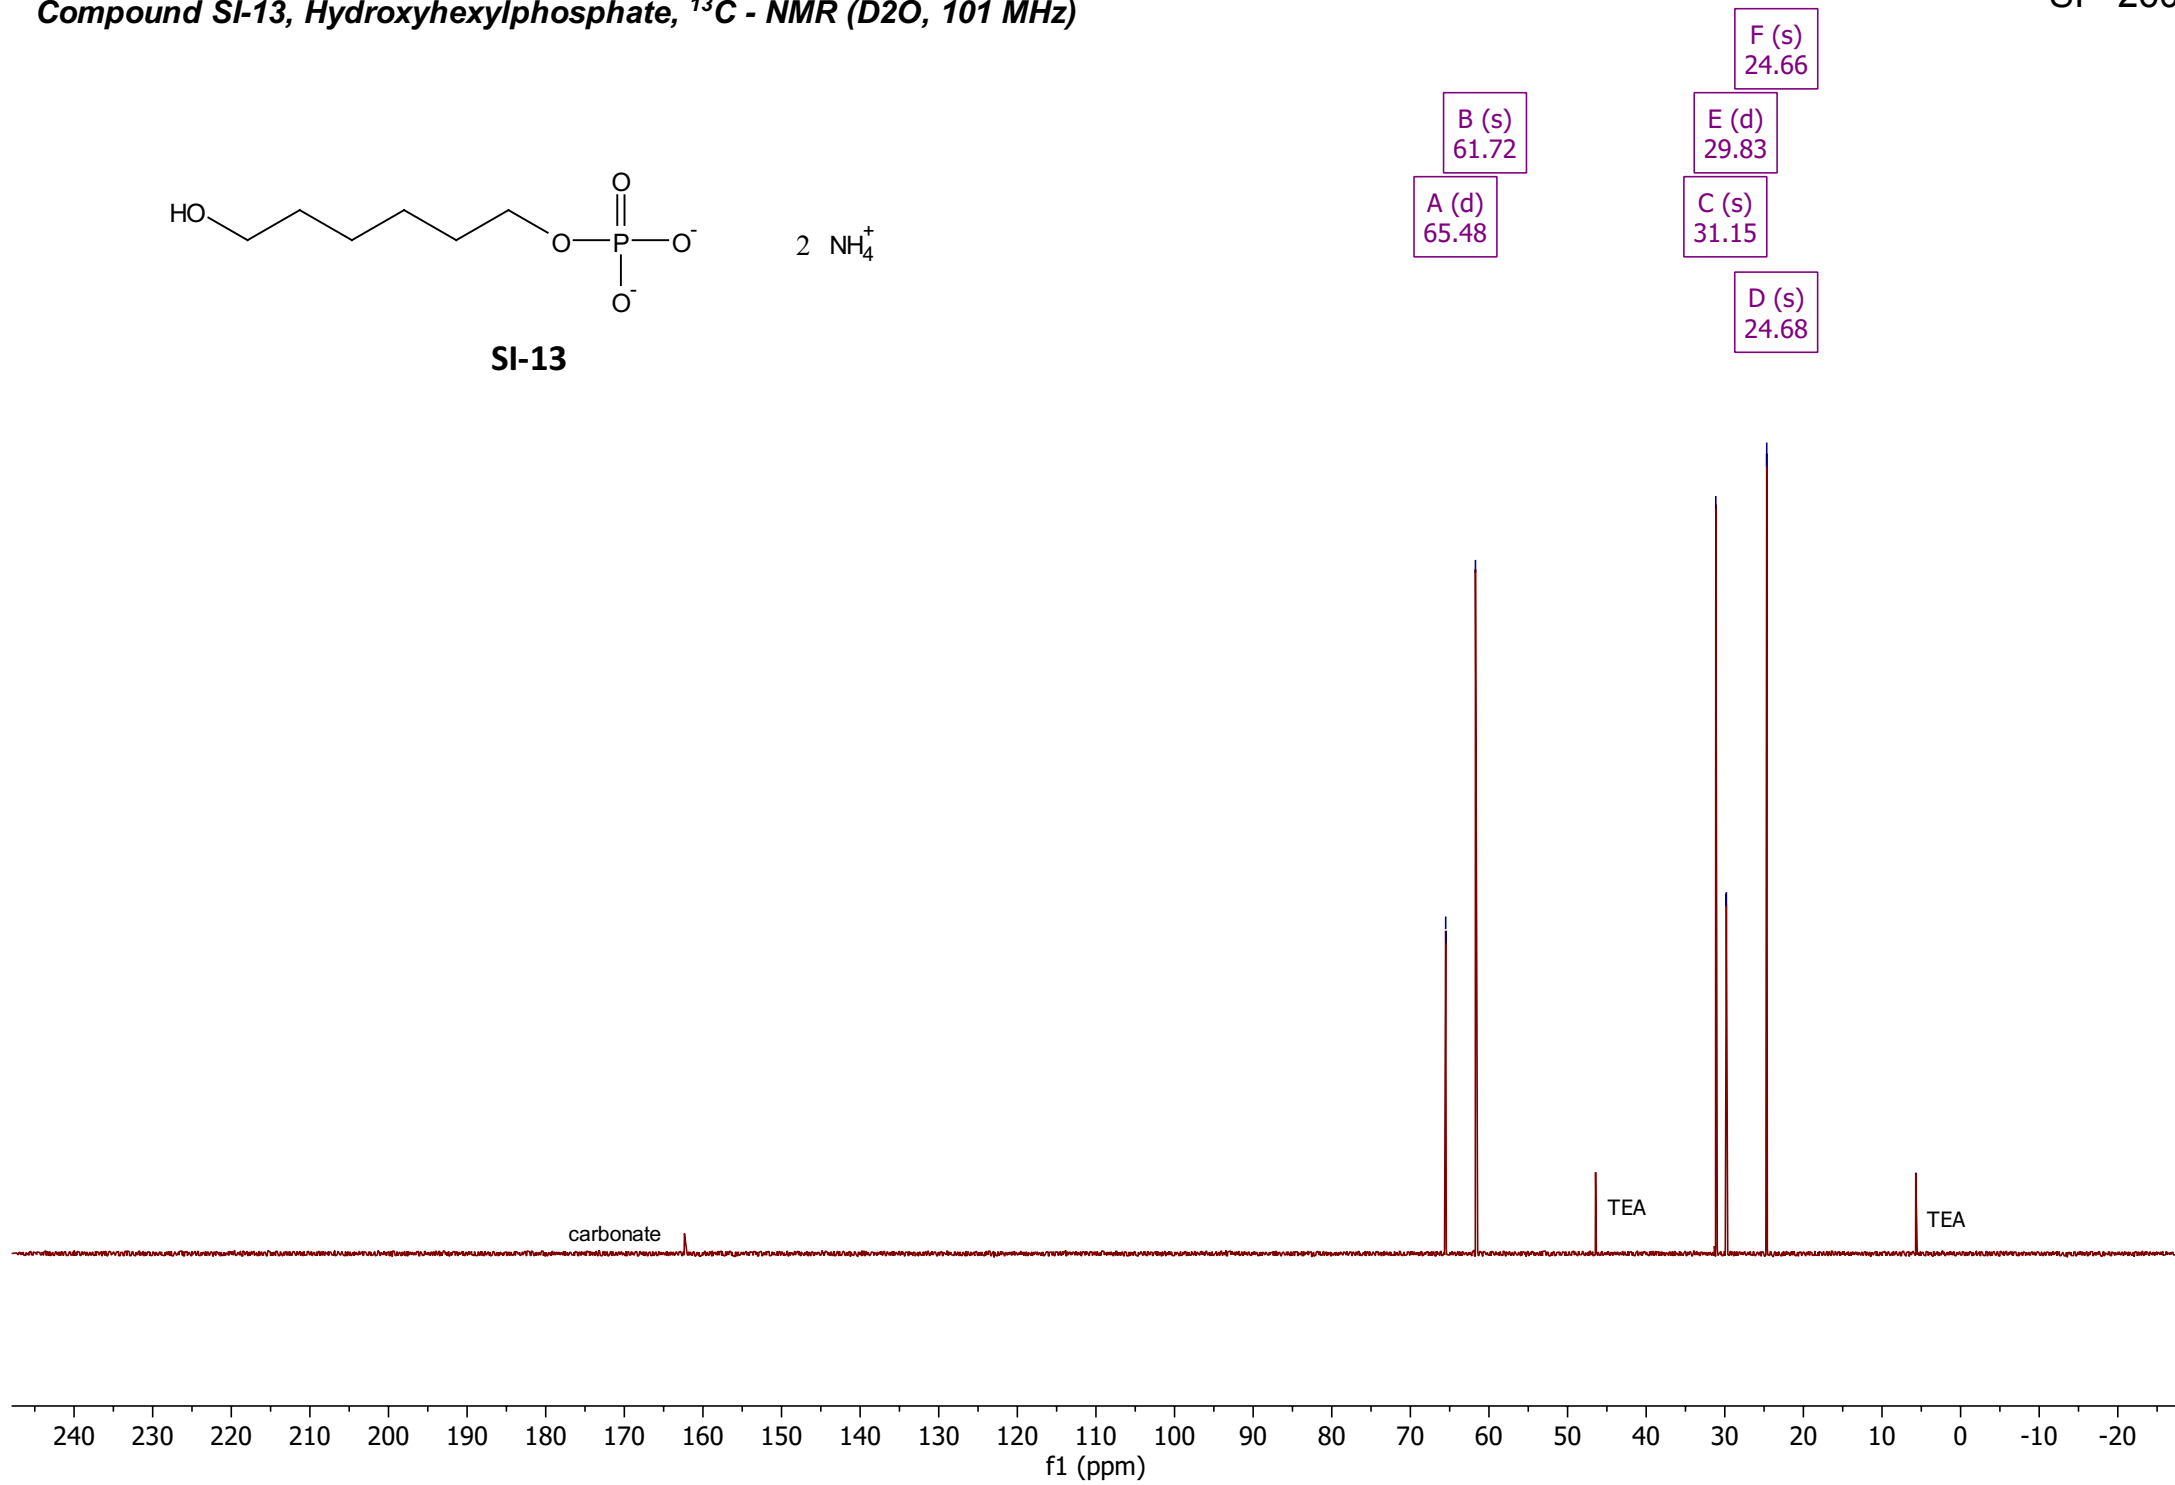

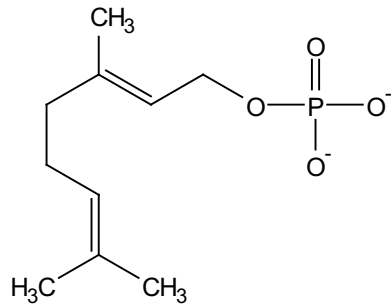

TBA - salt

**SI-14**

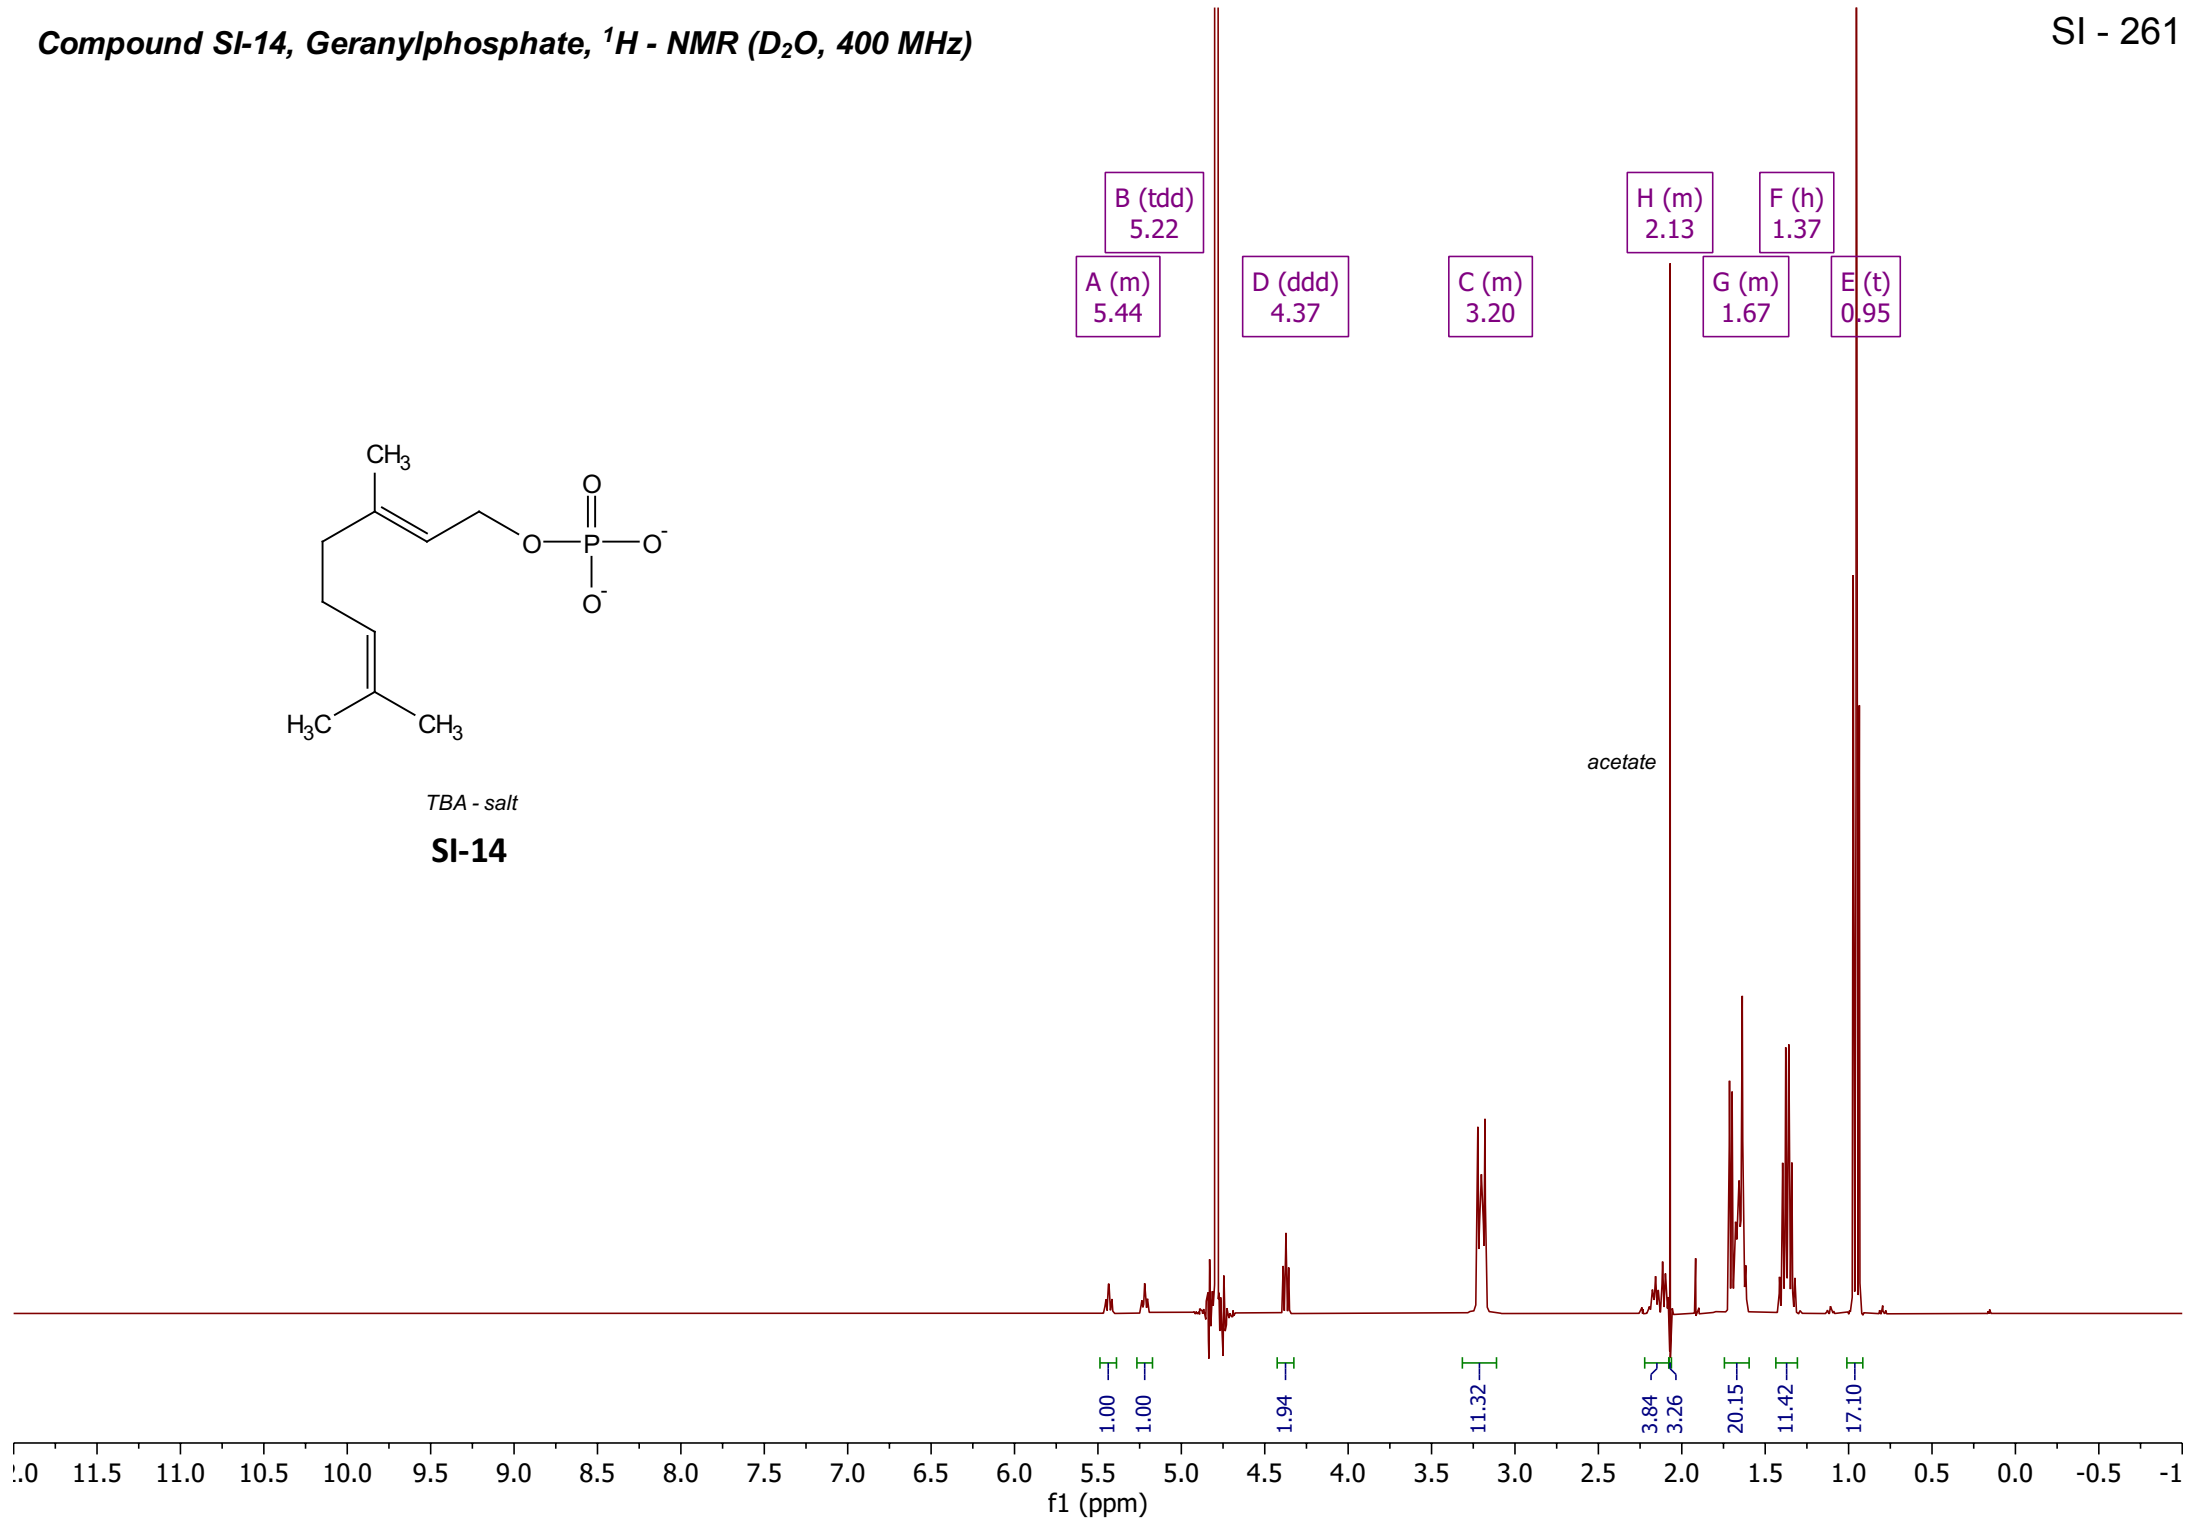



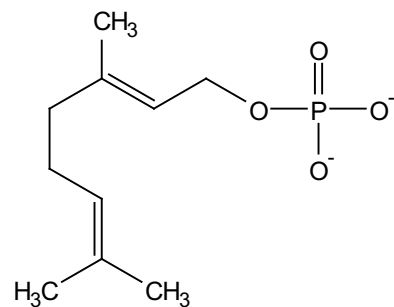

TBA - salt

**SI-14**

A (s)  
1.61



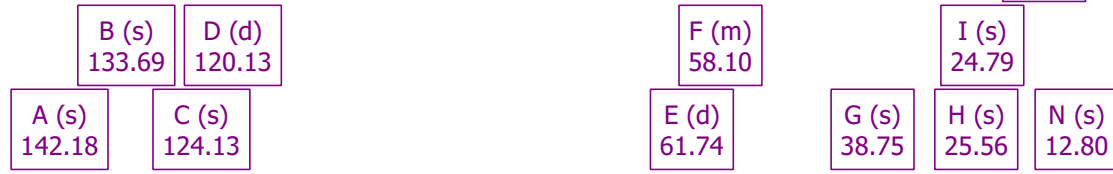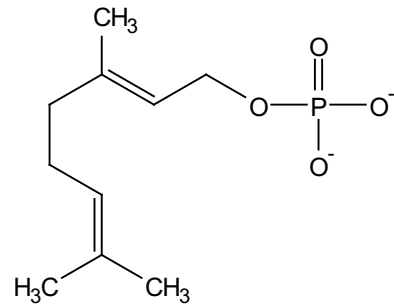

TBA - salt

**SI-14**

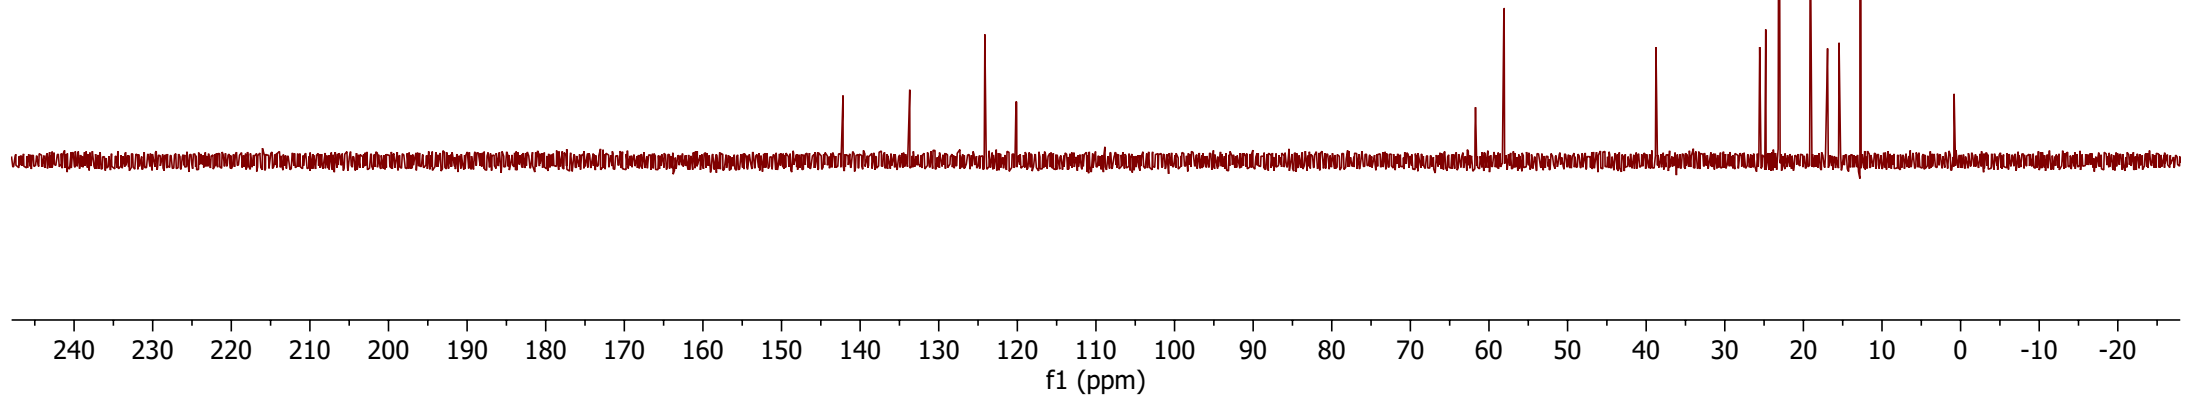

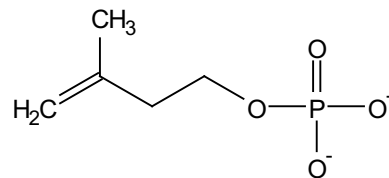

piperidinium/ TEAA  
salt  
**SI-15**

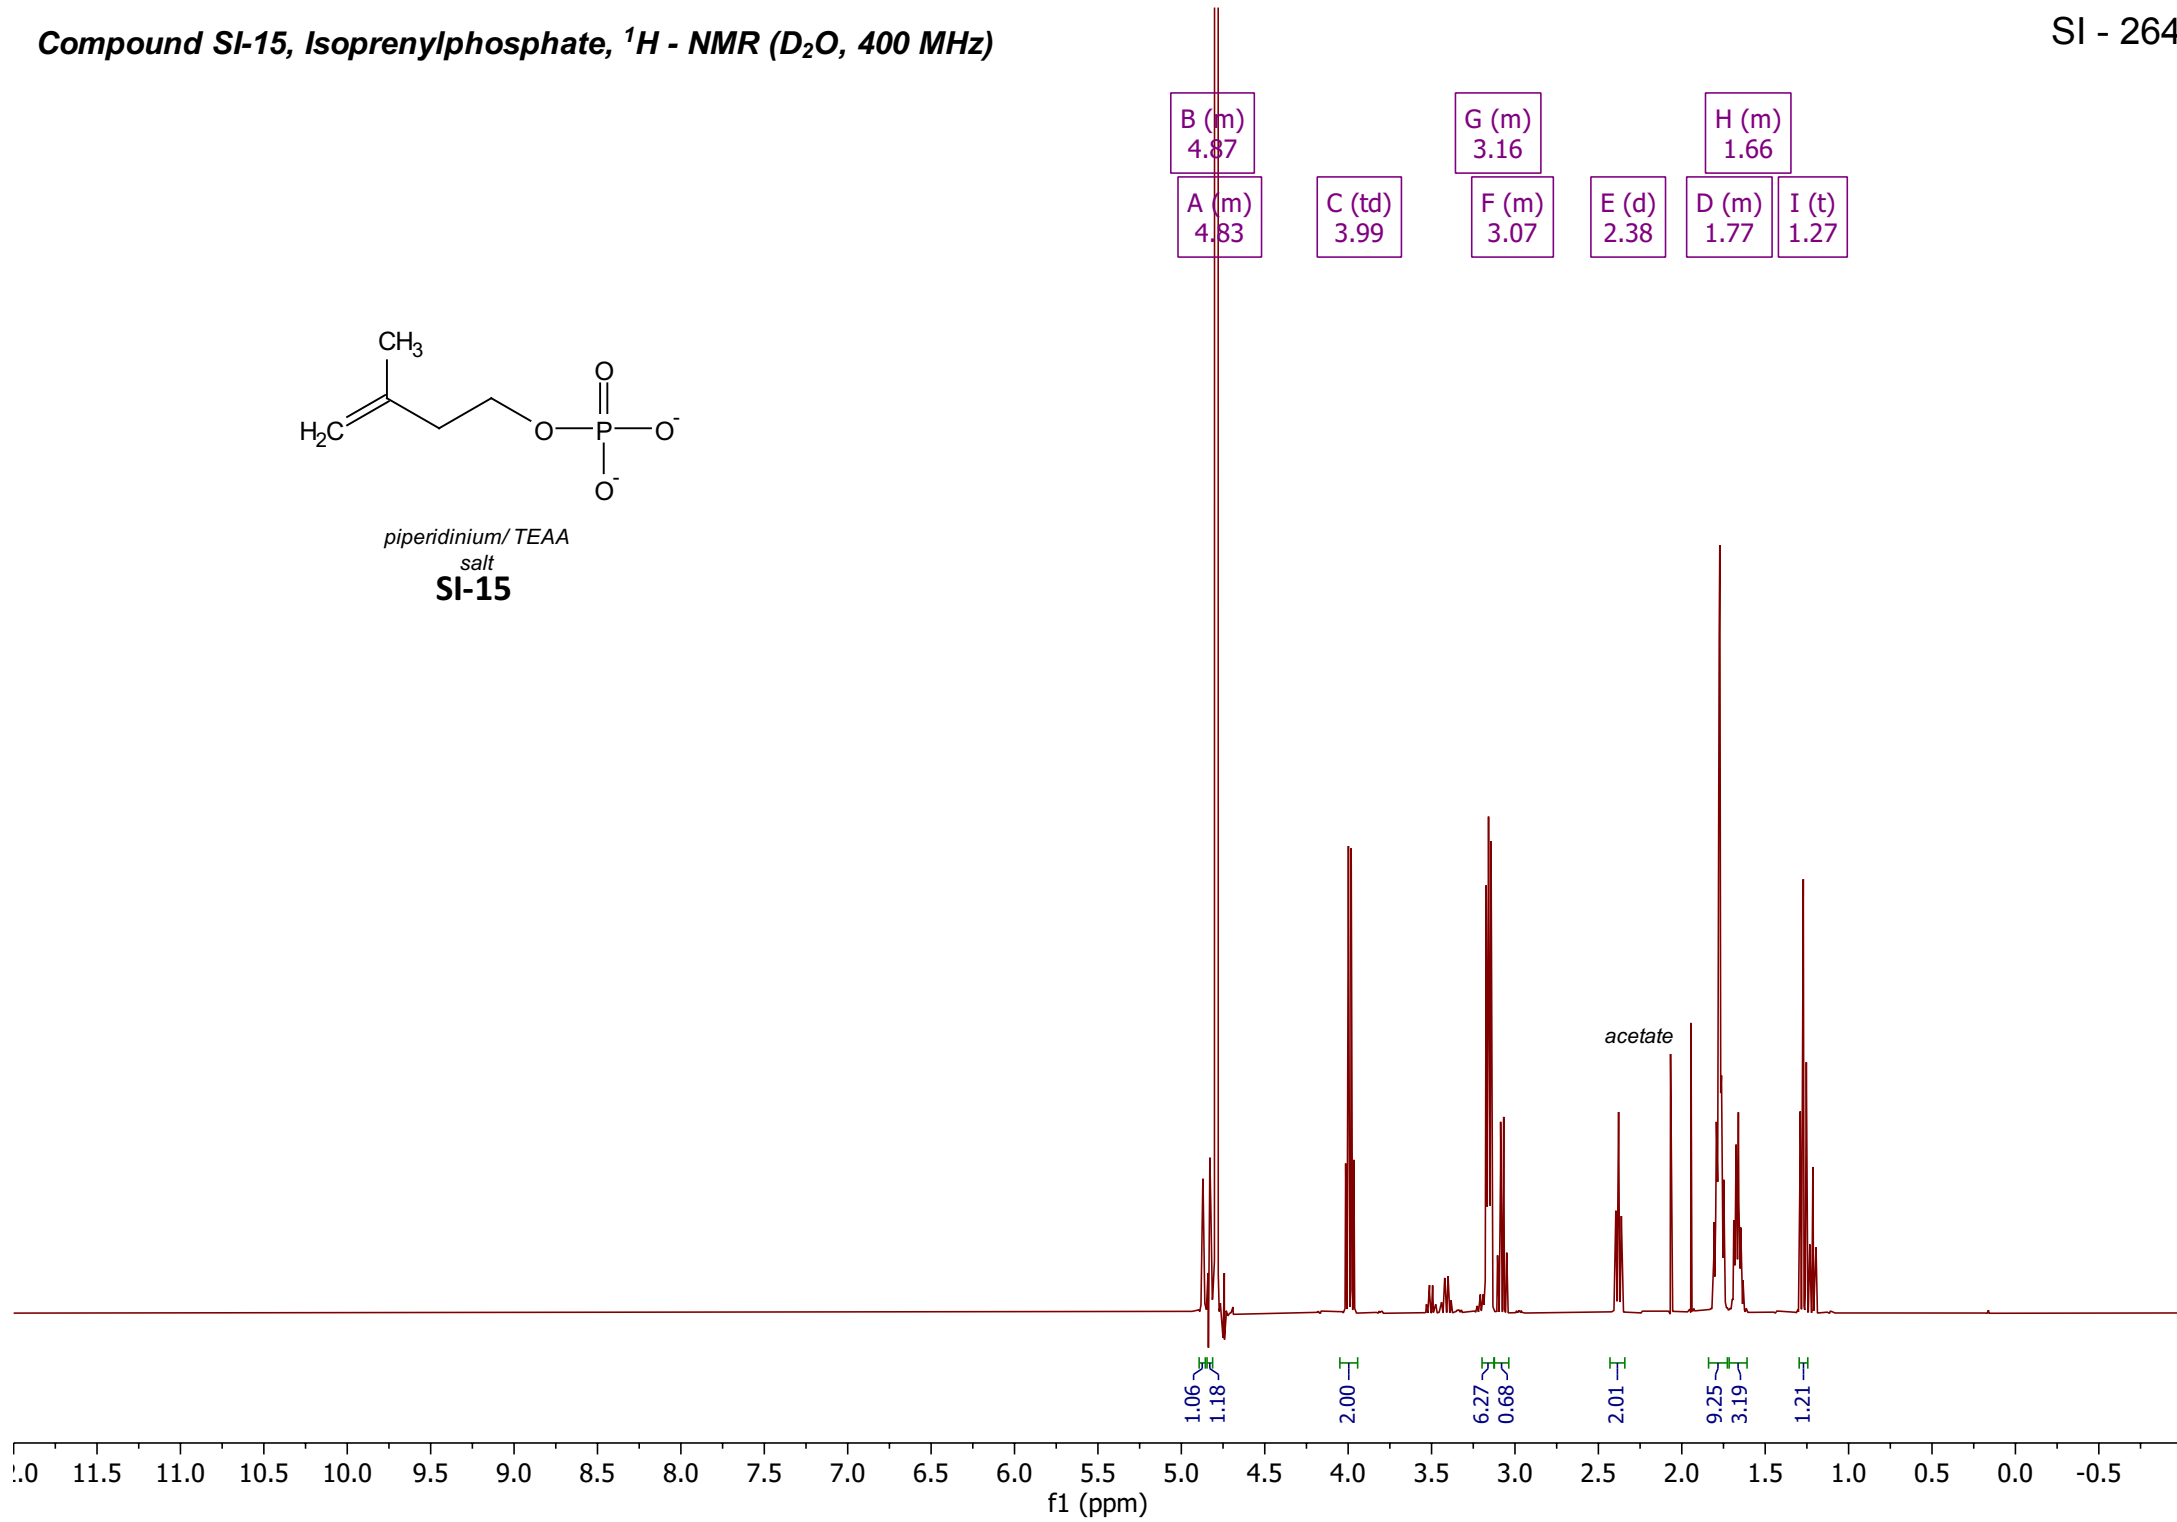



piperidinium/ TEAA  
salt  
**SI-15**

A (s)  
0.49

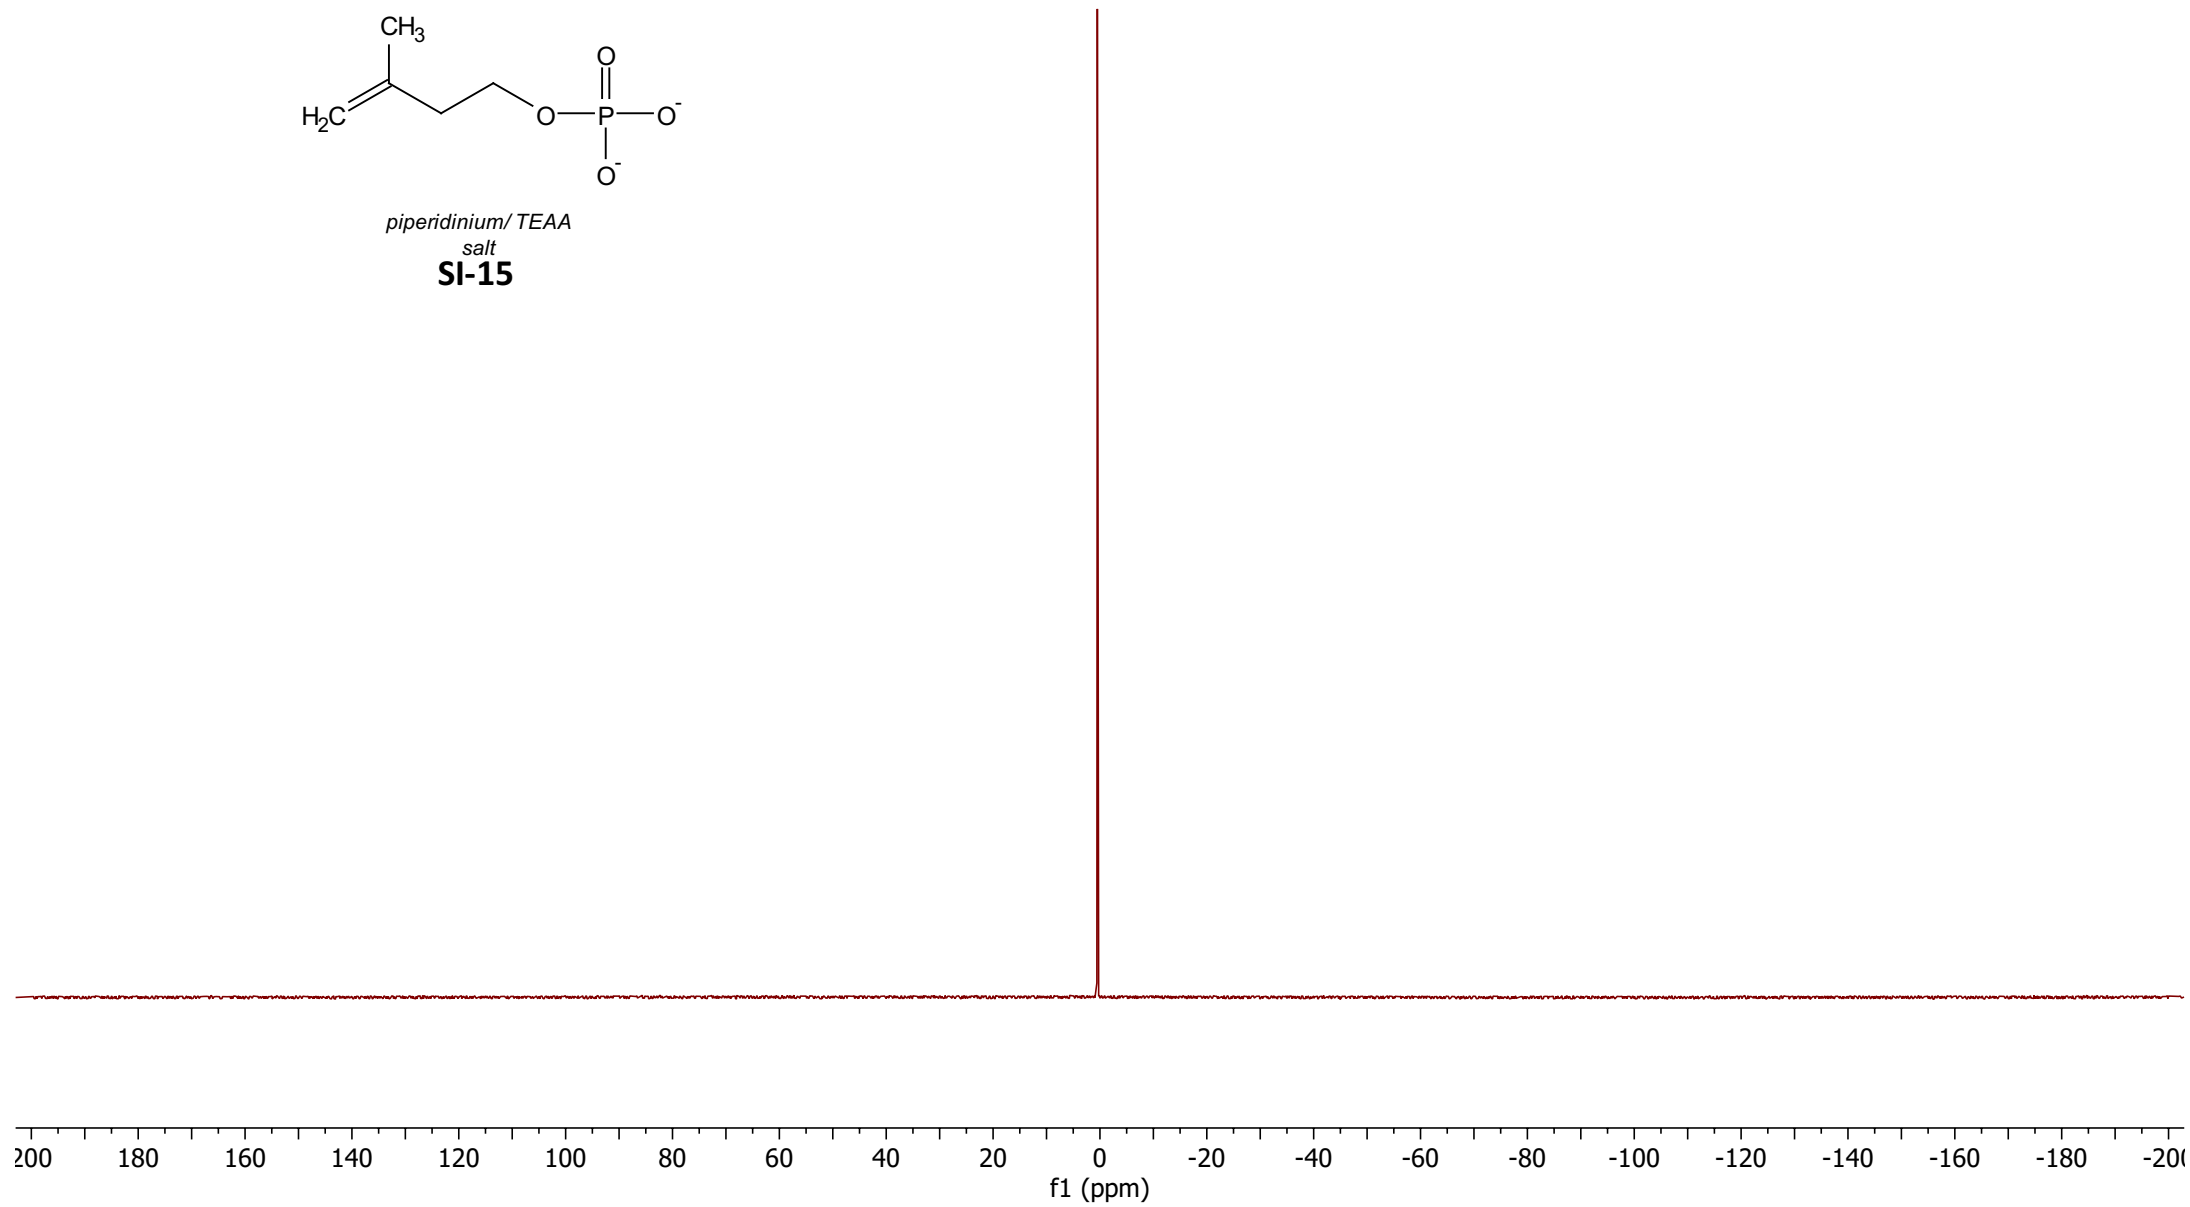



piperidinium/ TEAA  
salt

**SI-15**

A (t)  
0.48

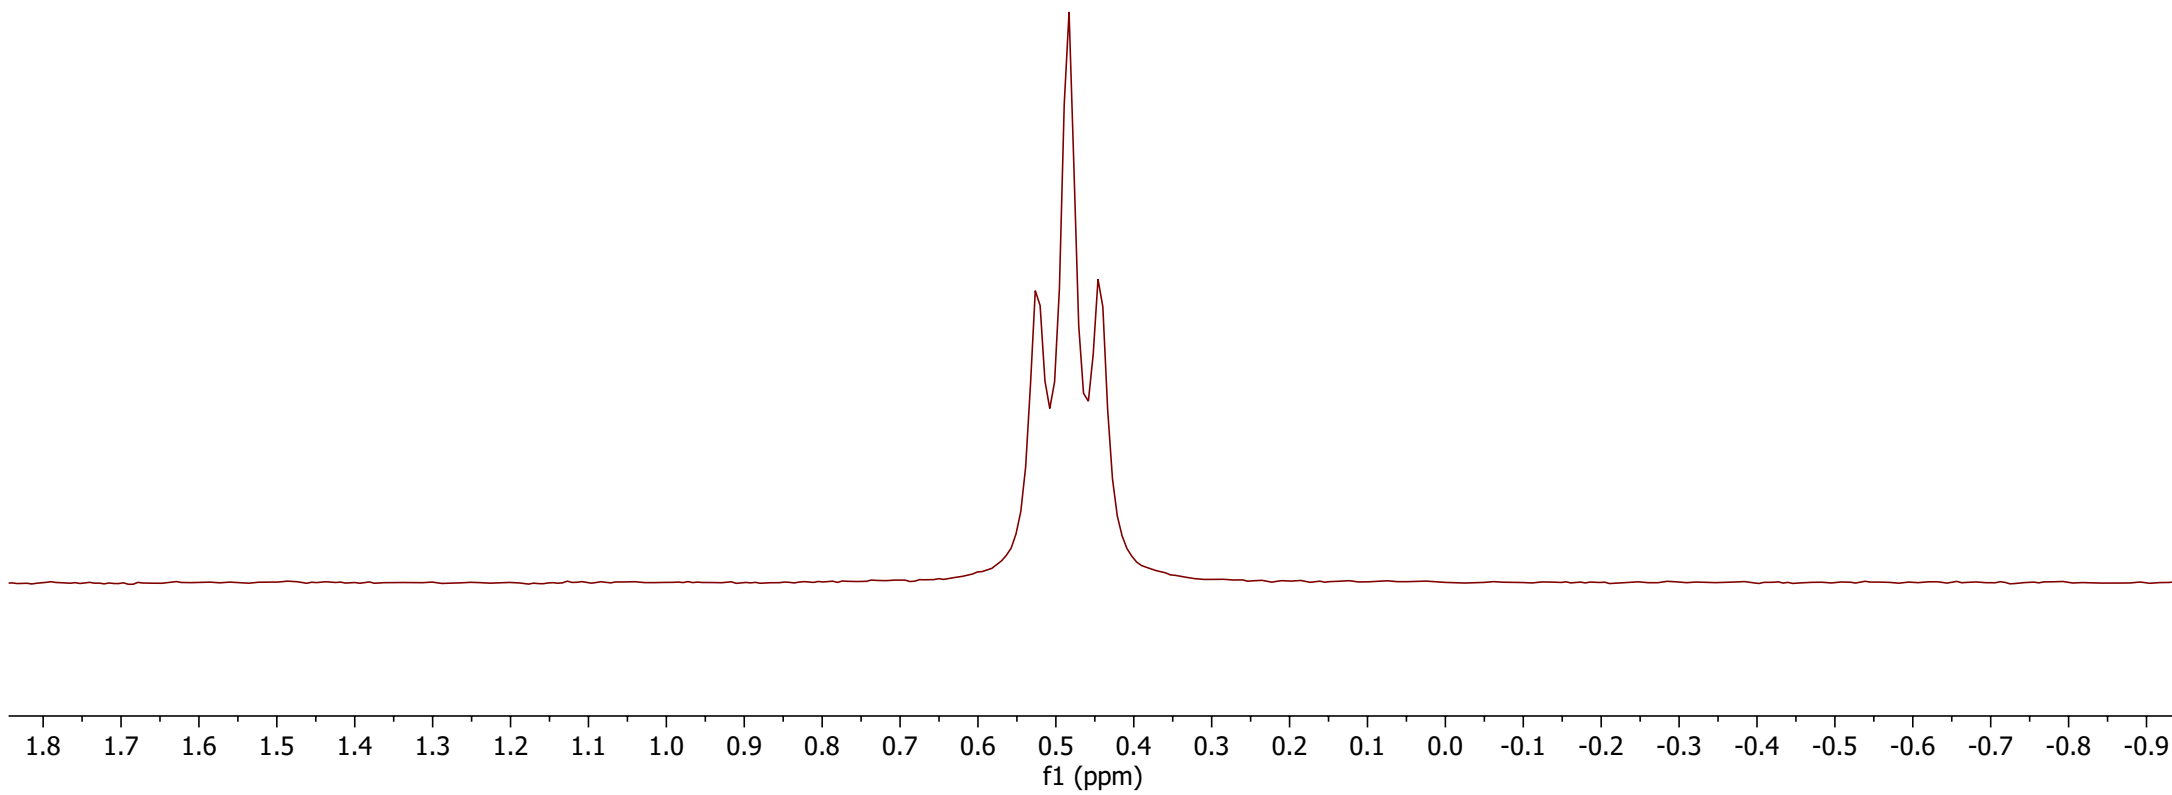



piperidinium/ TEAA  
salt  
**SI-15**

A (s)  
143.62

B (s)  
111.52

C (d)  
63.71

E (s)  
44.51

D (d)  
37.92

G (s)  
21.45

F (s)  
22.18

H (s)  
21.55

I (s)  
27.12

J (s)  
14.47

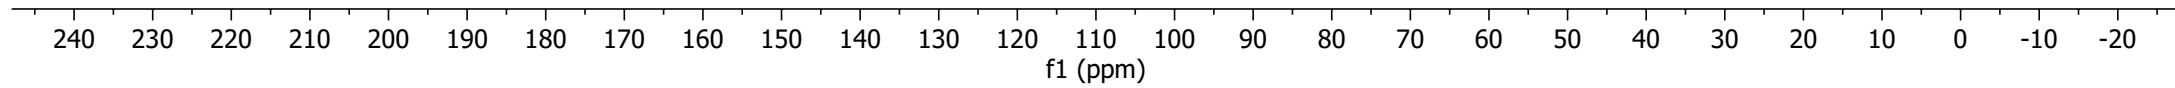

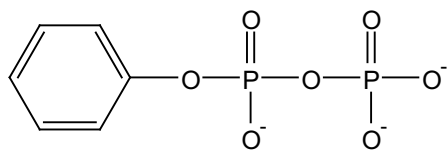

piperidinium salt

**SI-16**

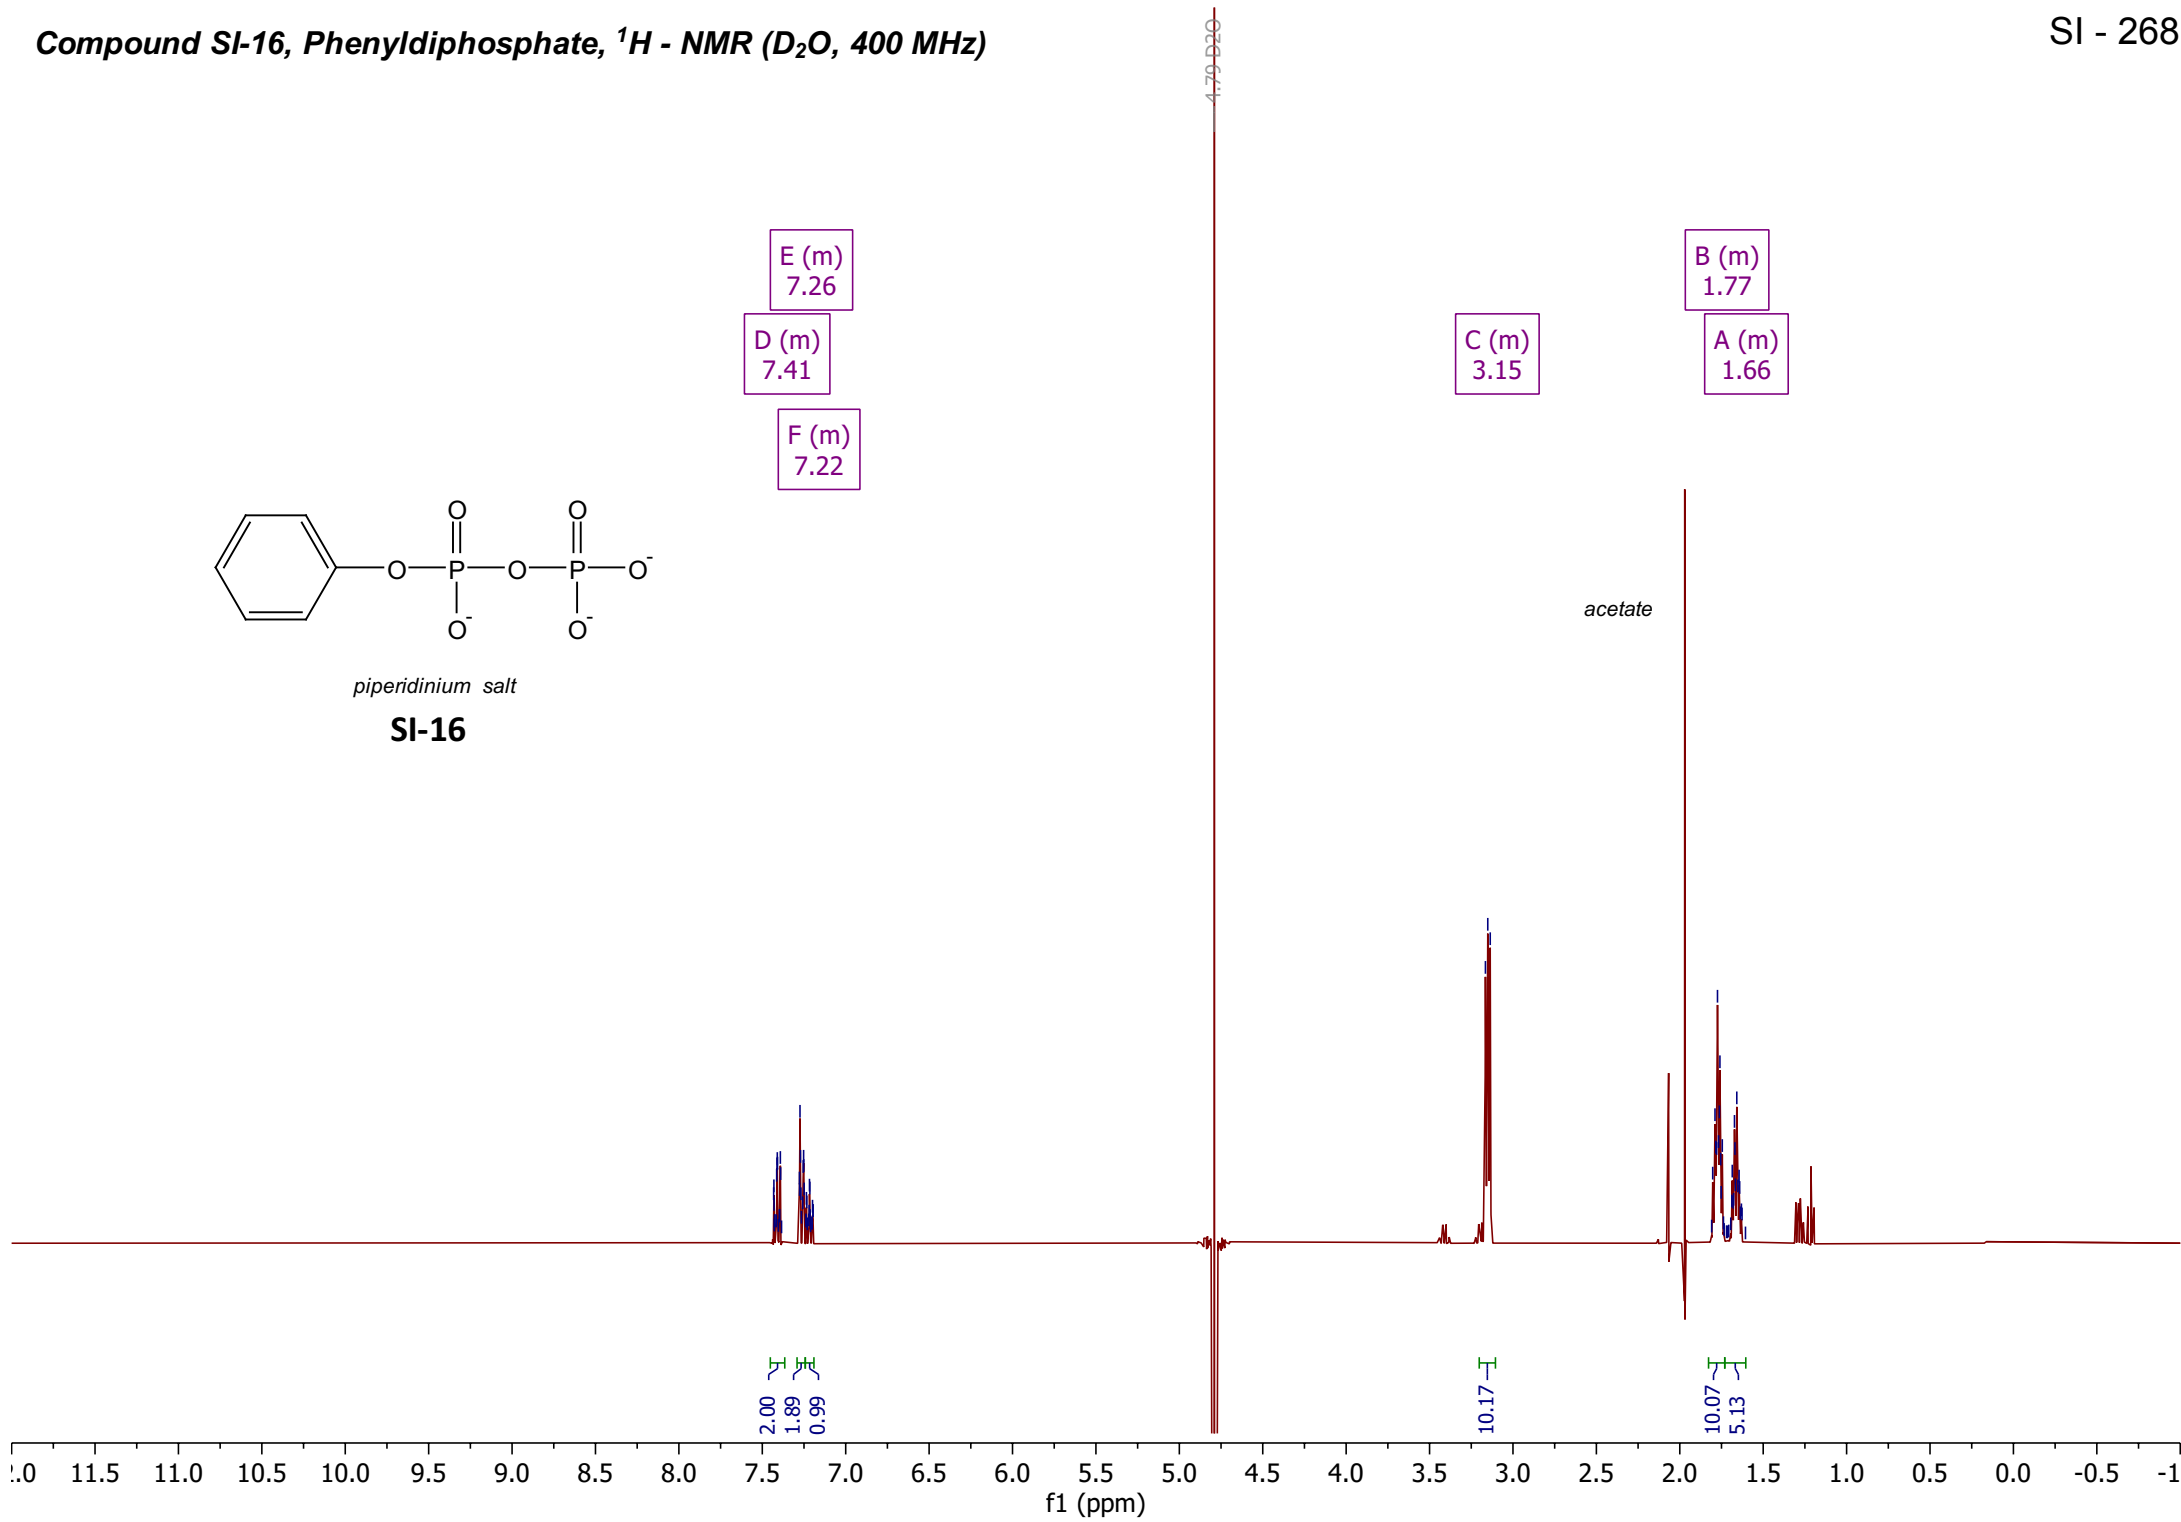

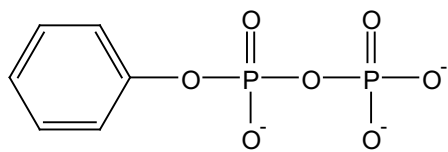

piperidinium salt

**SI-16**

B (d)  
-10.80

A (d)  
-15.71

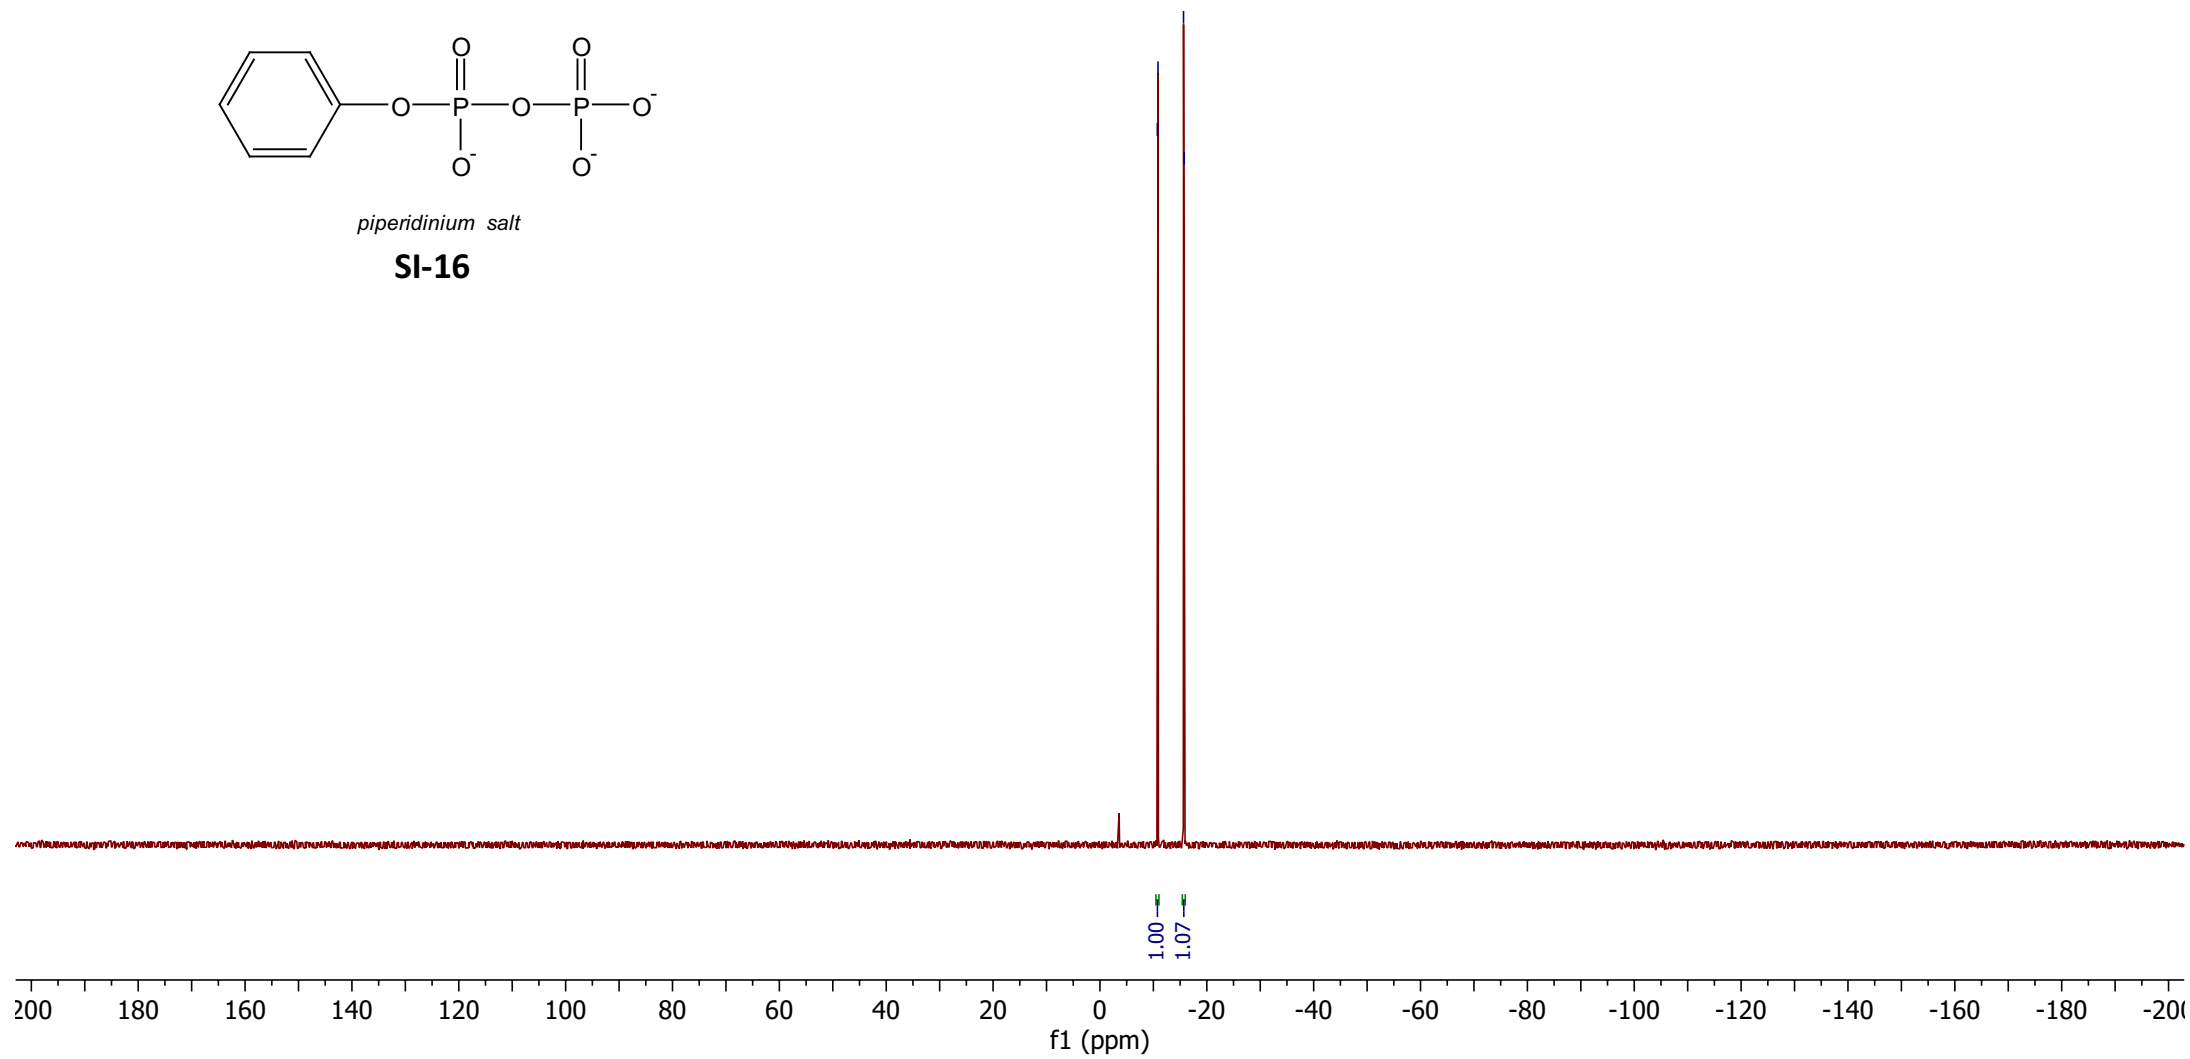



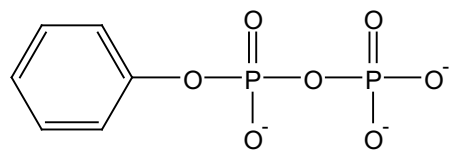

piperidinium salt

**SI-16**

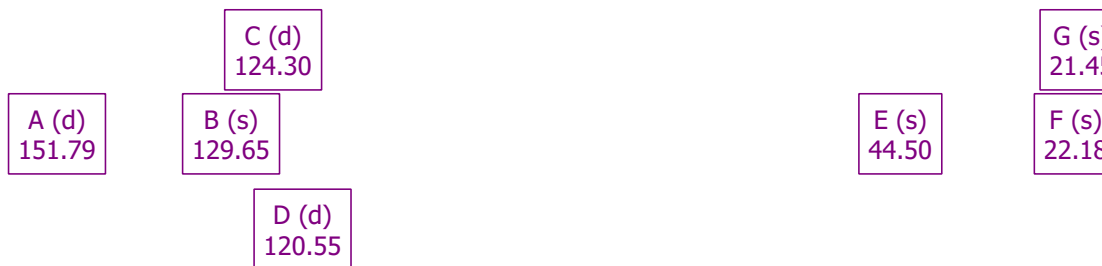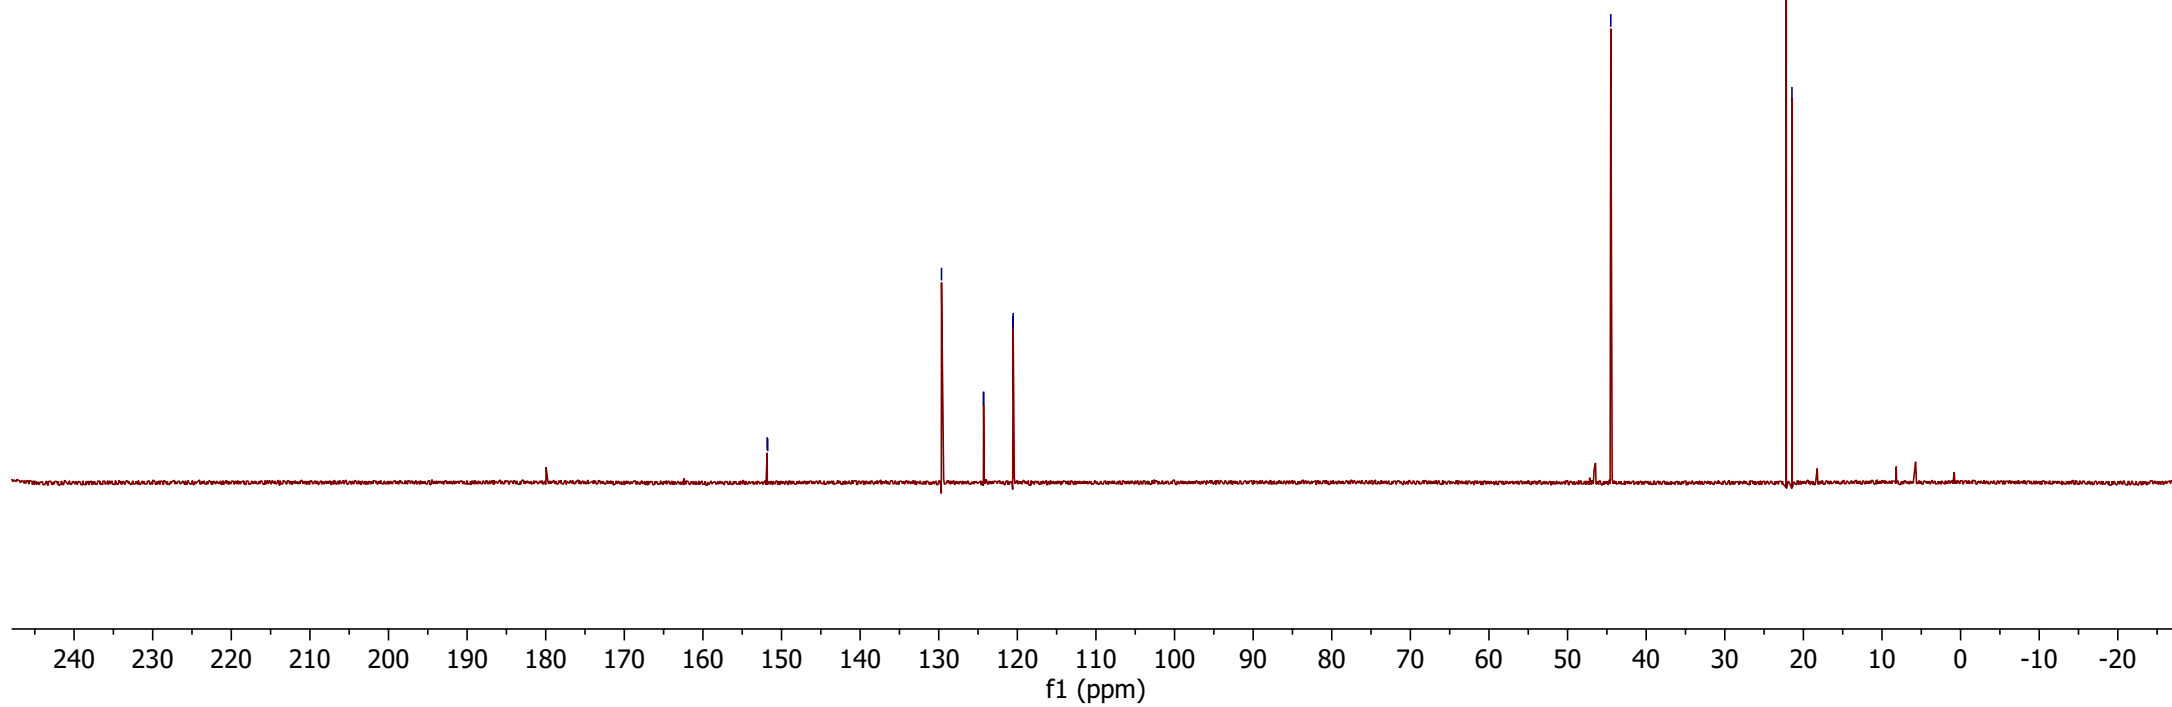

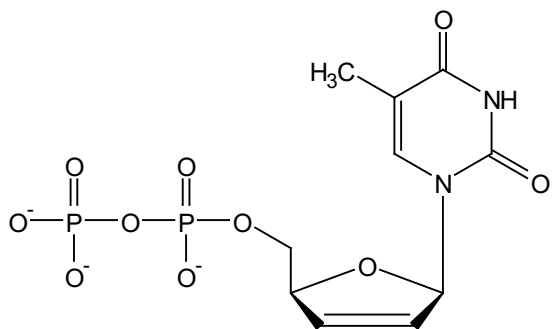

TEA - salt  
SI-17

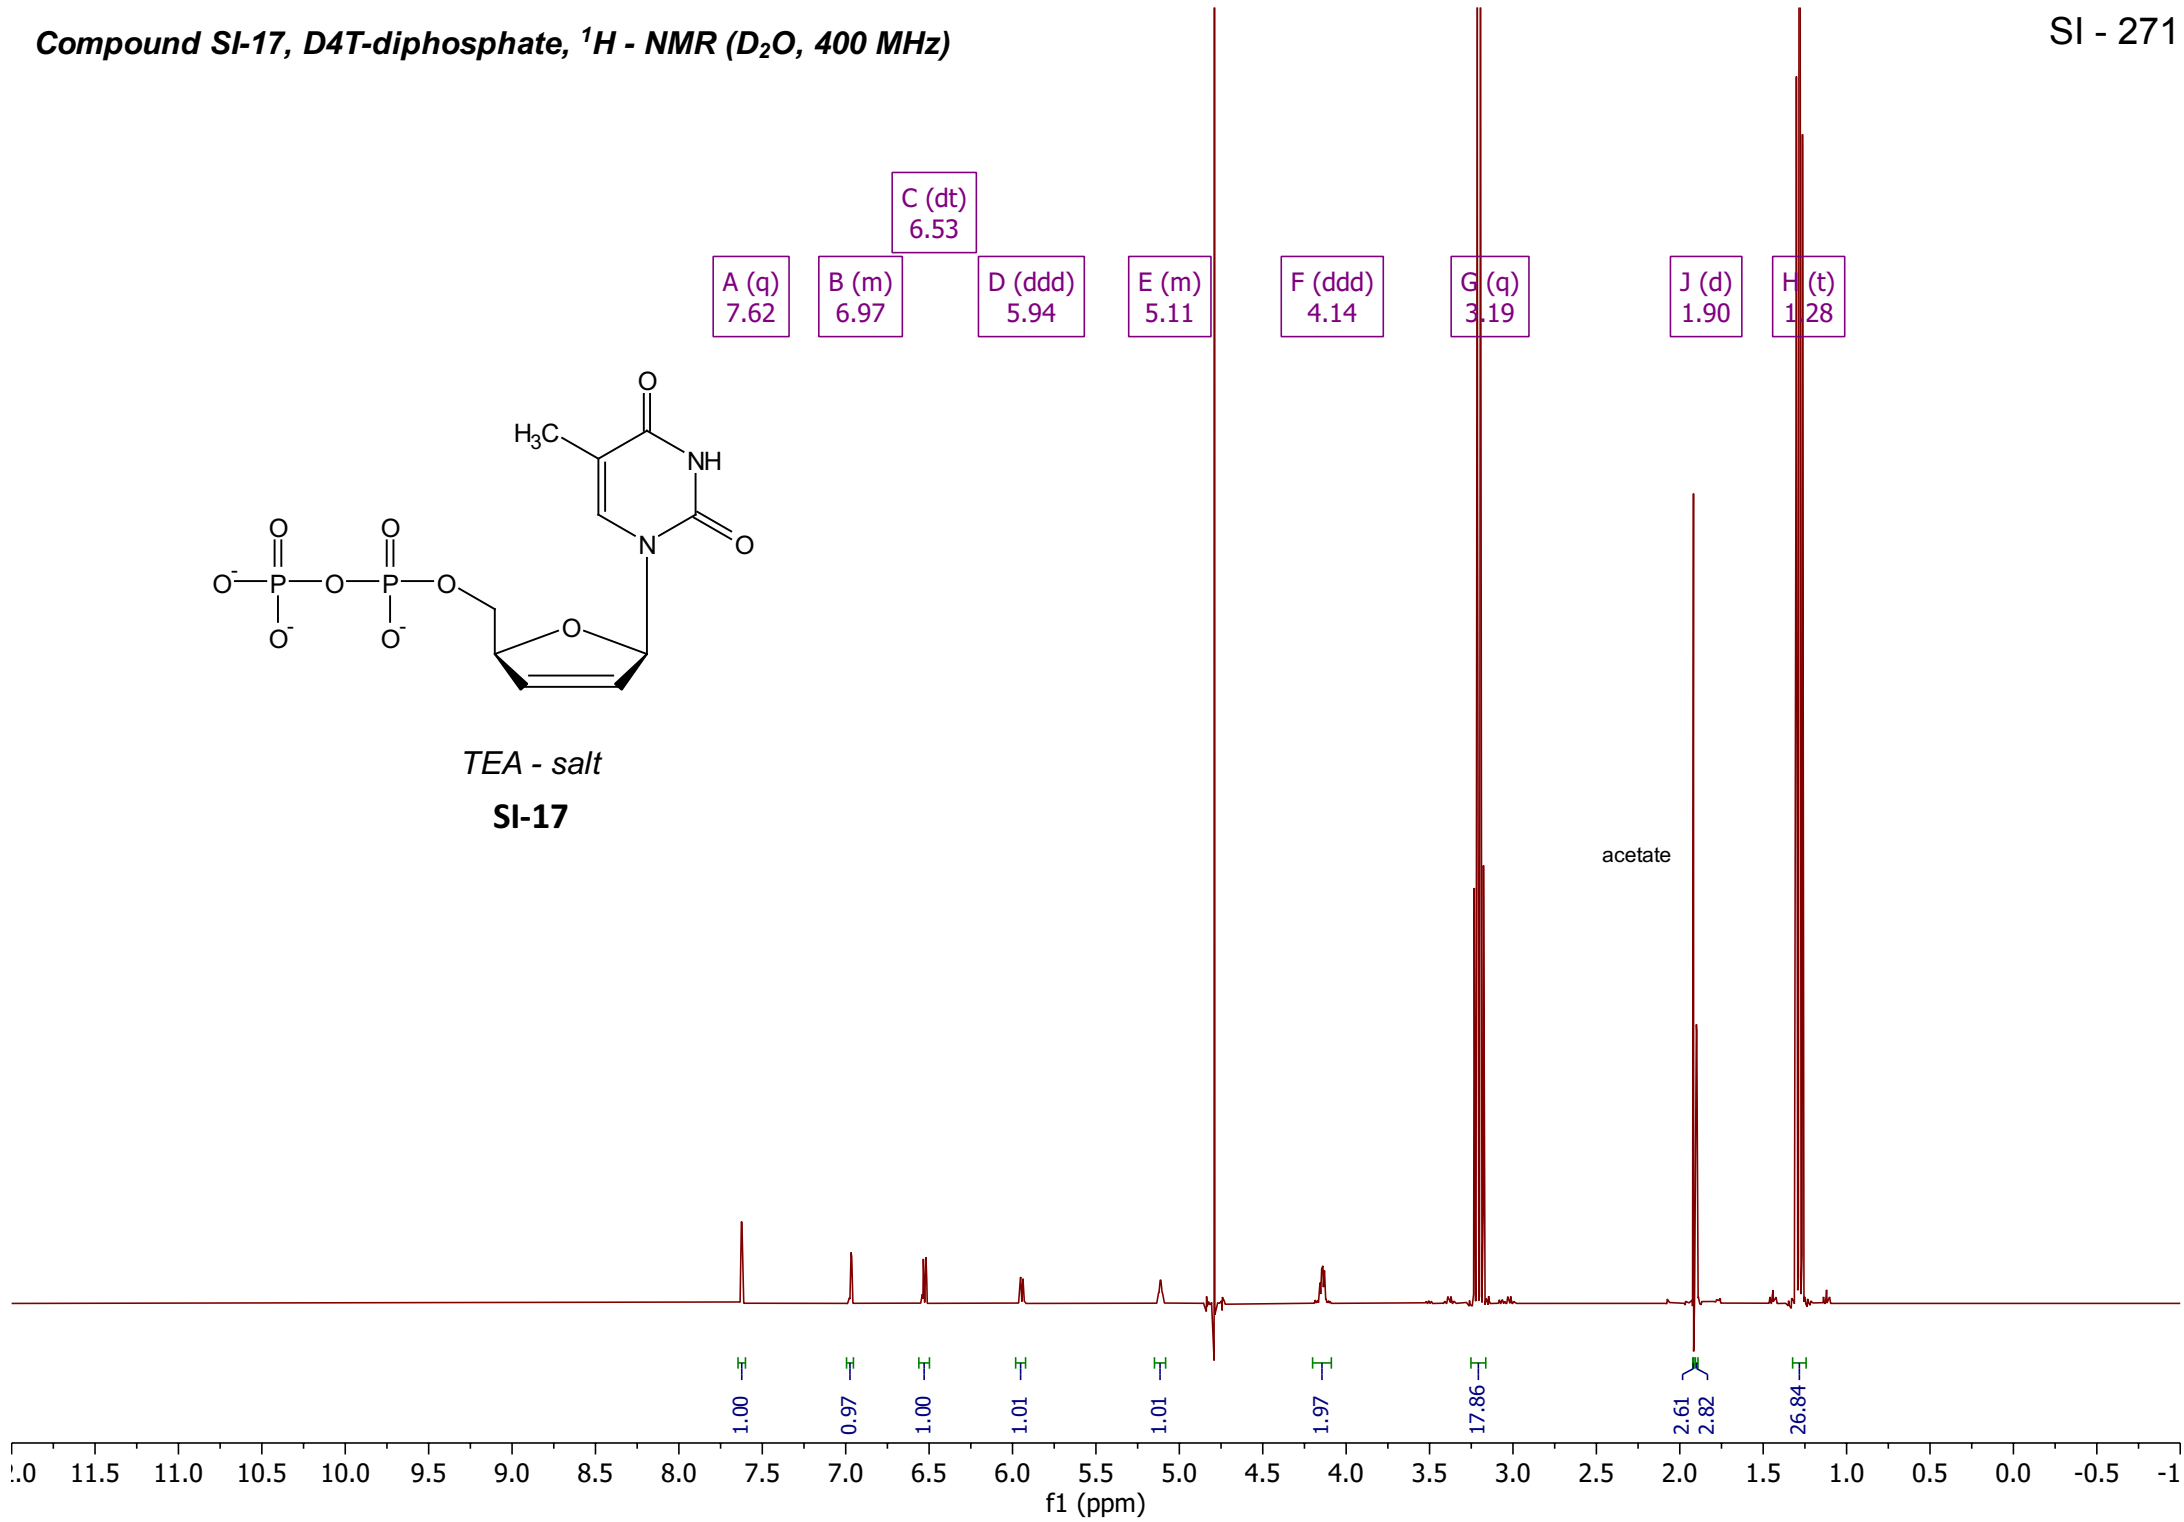



TEA - salt  
SI-17

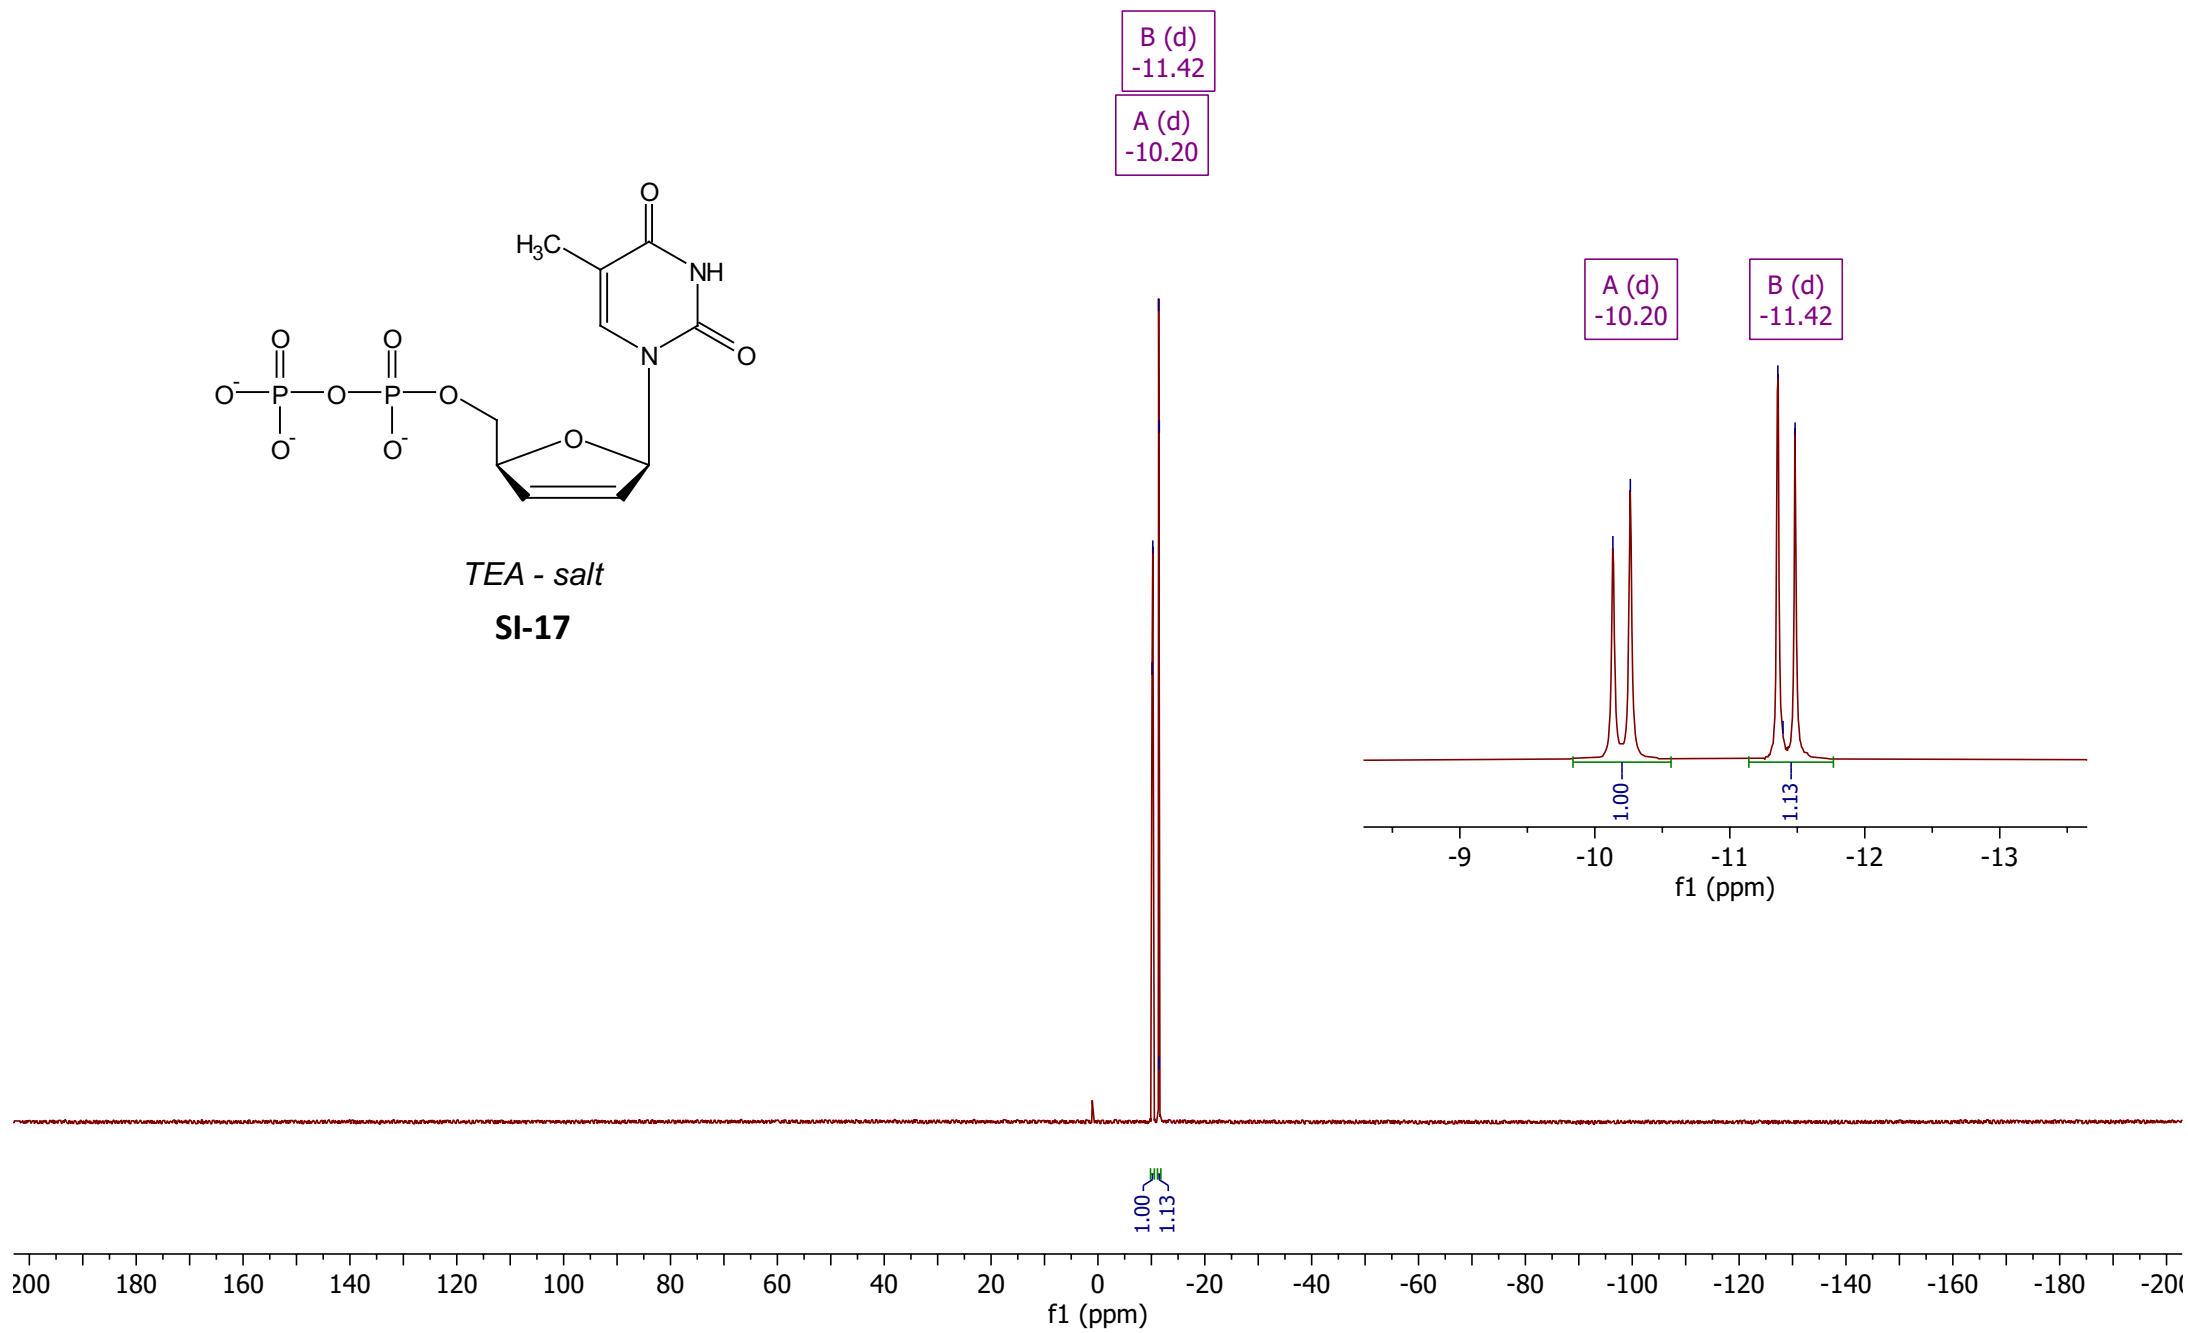



TEA - salt  
SI-17

A (d)  
-10.20

B (dt)  
-11.42

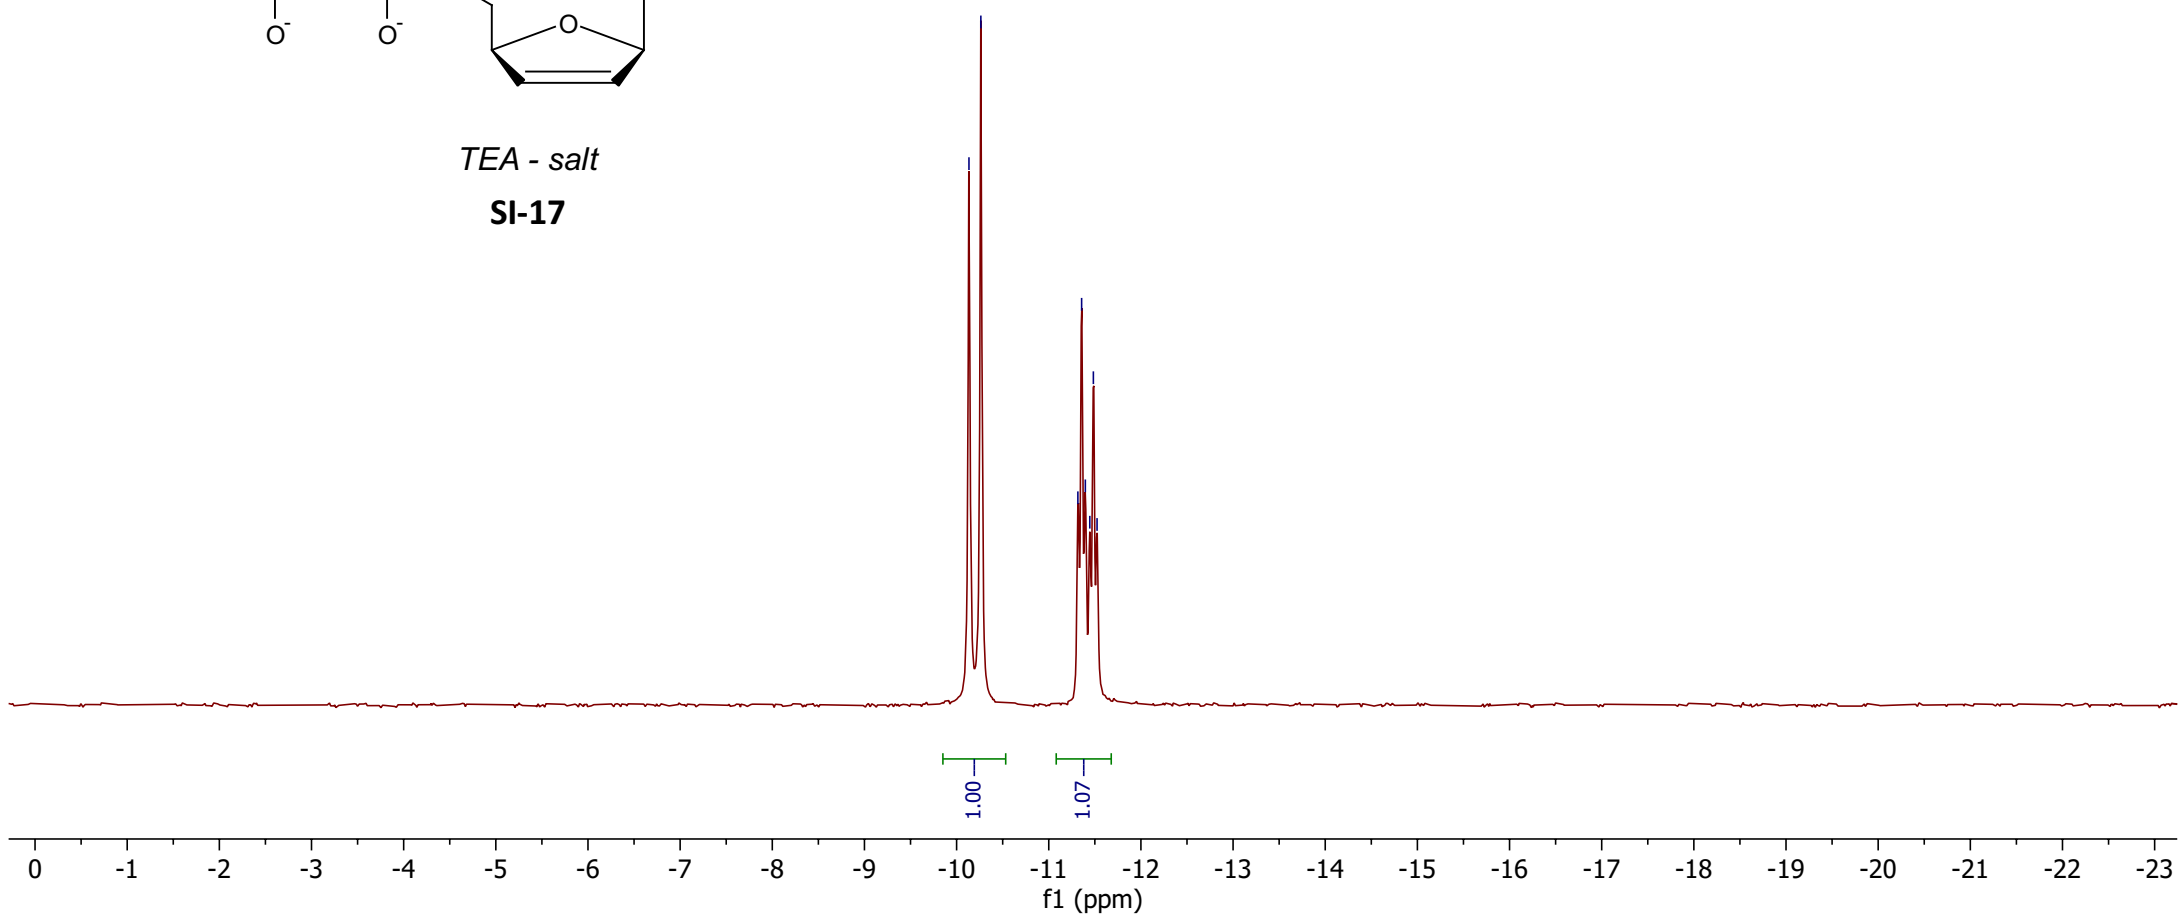

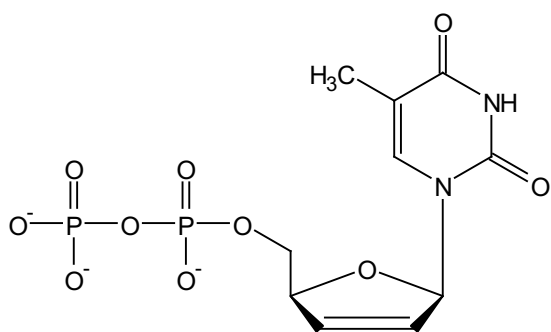

TEA - salt  
SI-17

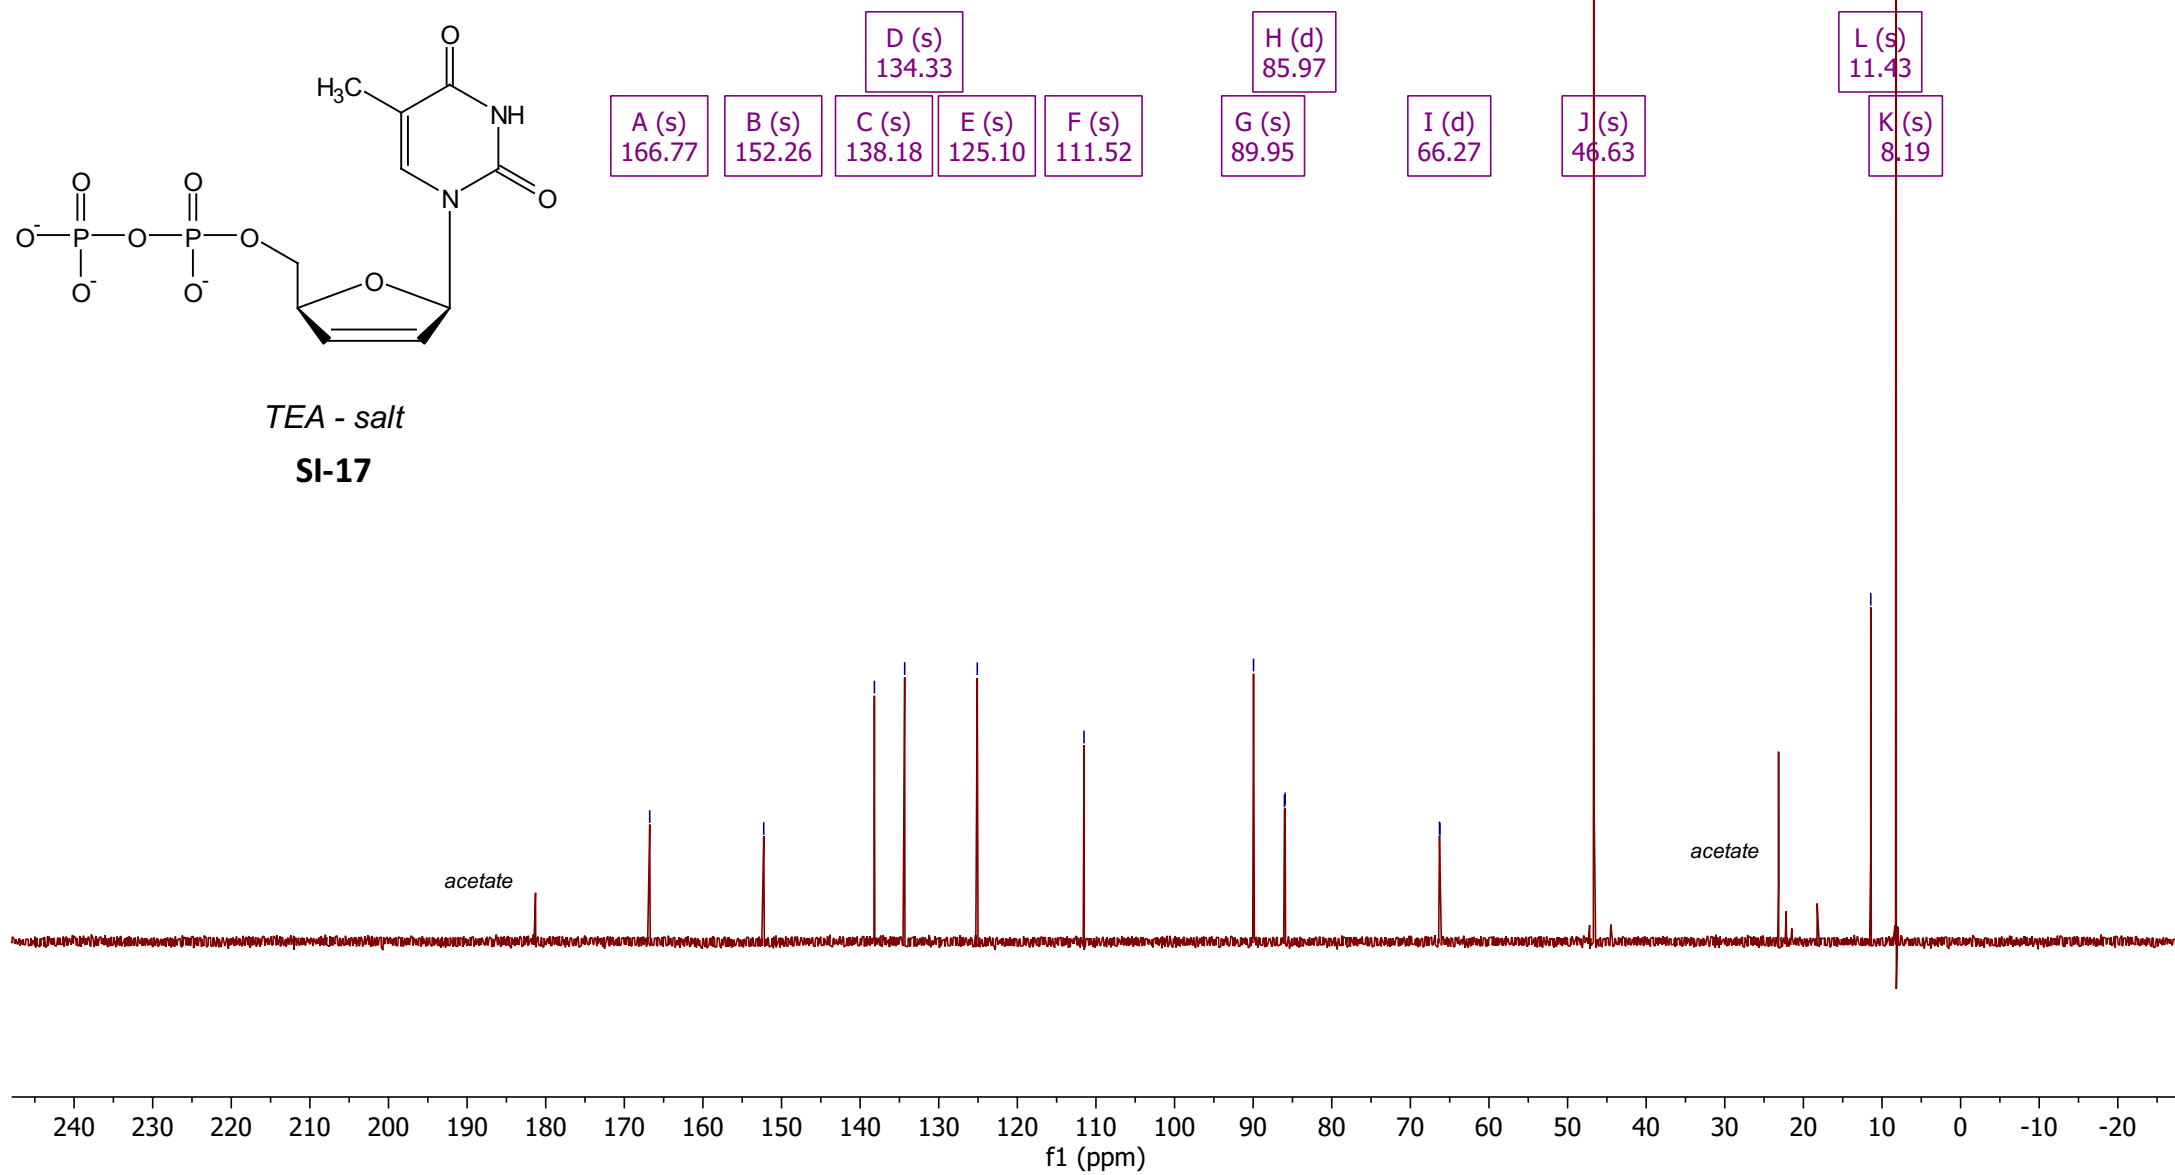

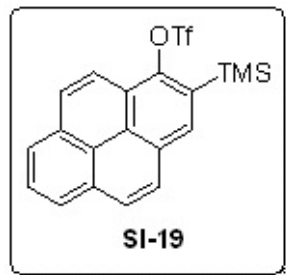

D (m)  
8.00

B (d)  
8.27

A (s)  
8.30

C (m)  
8.14

E (s)  
0.66

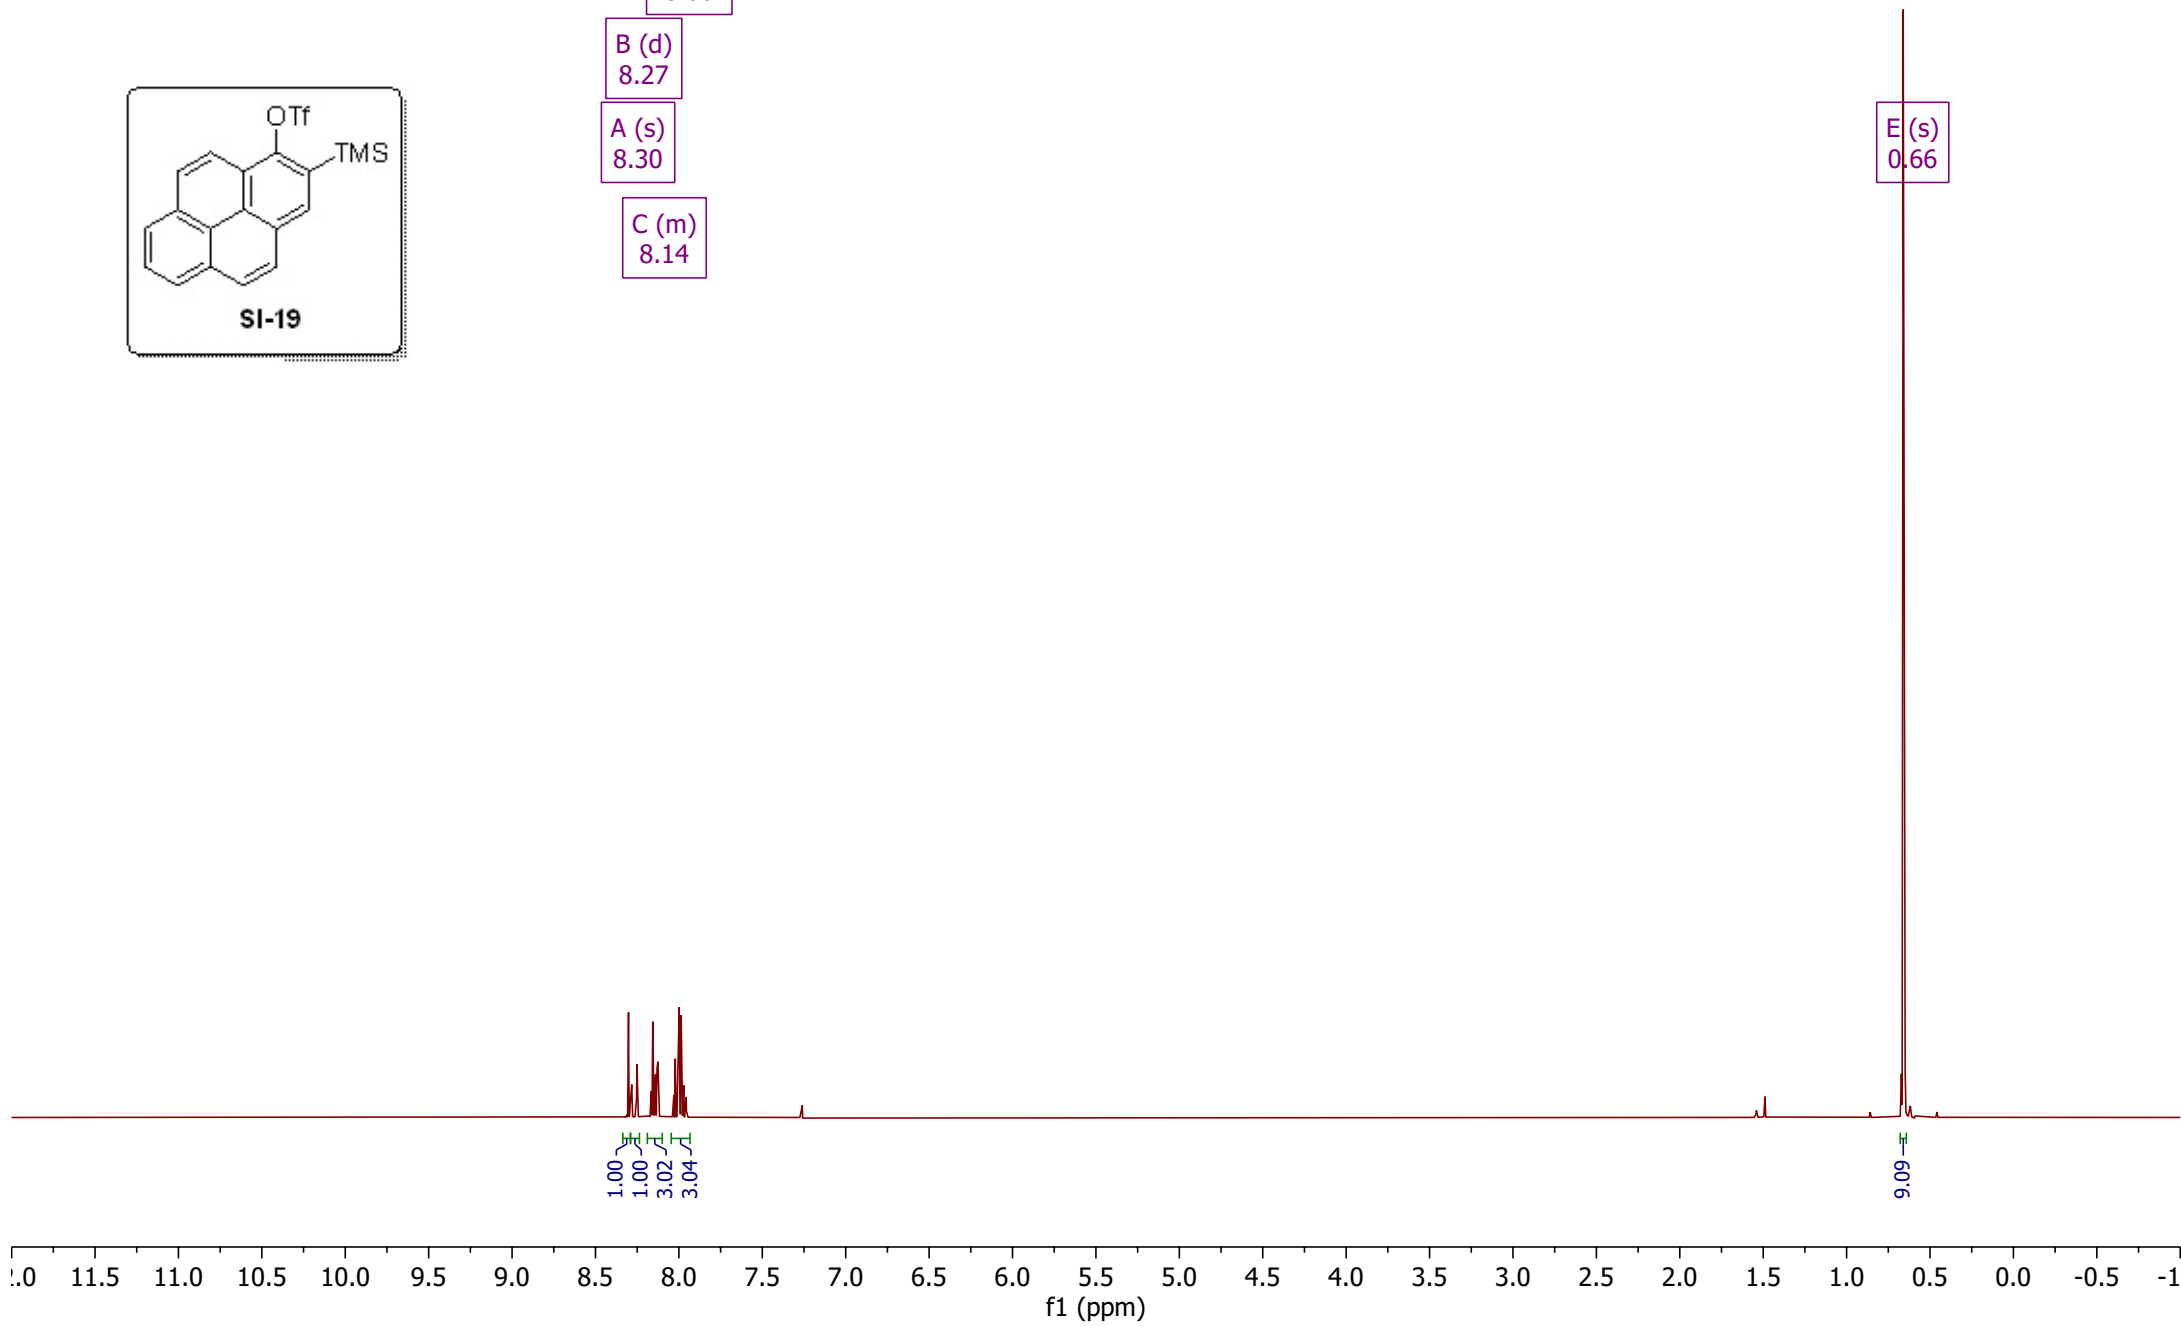

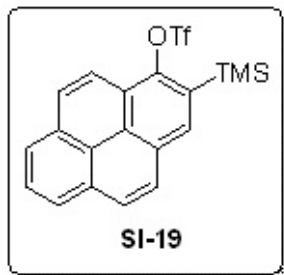

A (s)  
-72.59

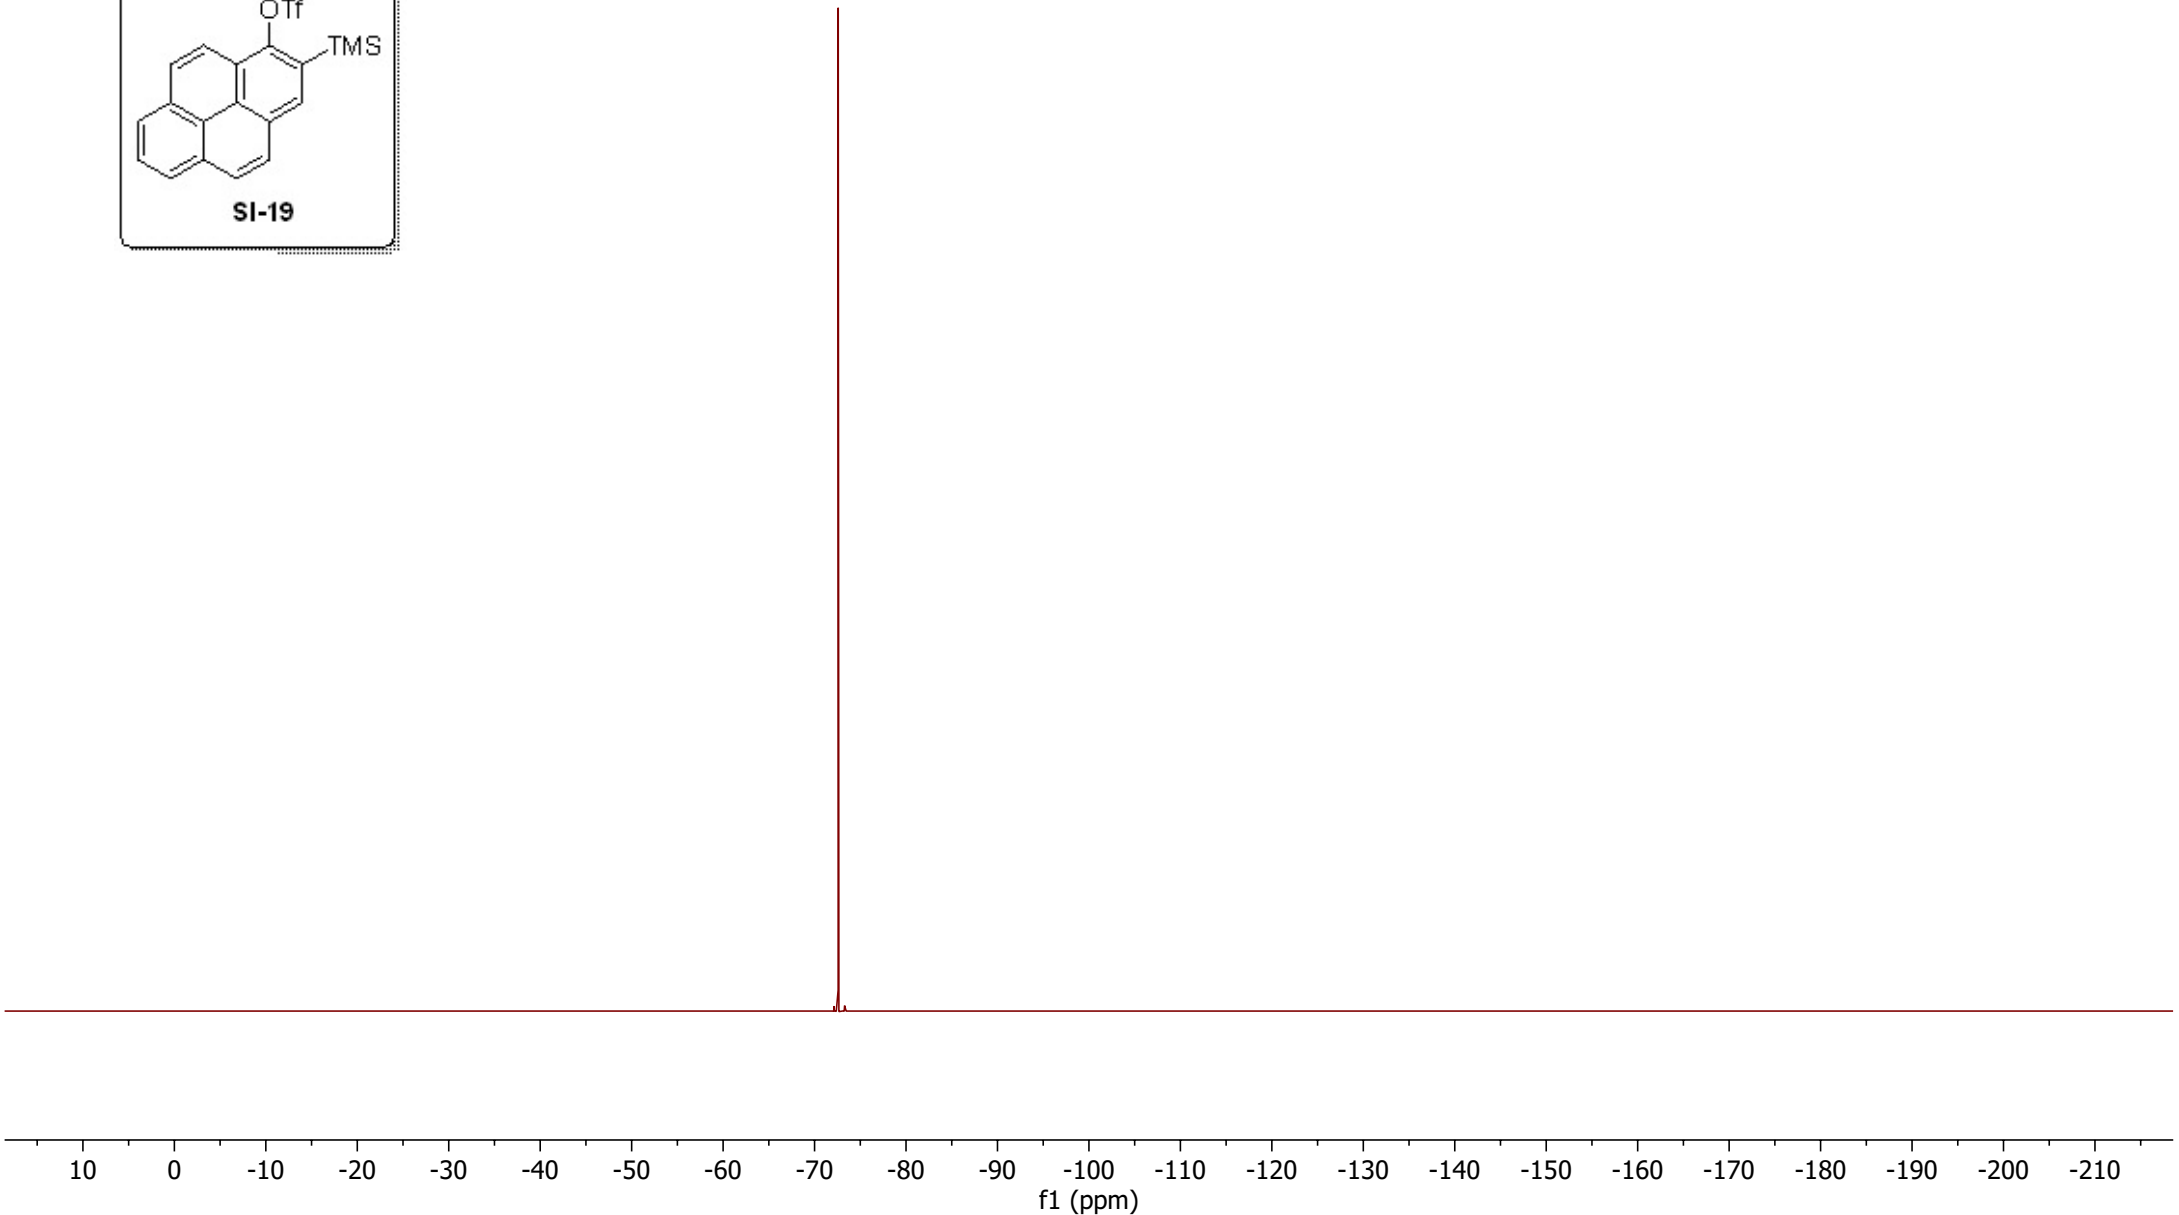

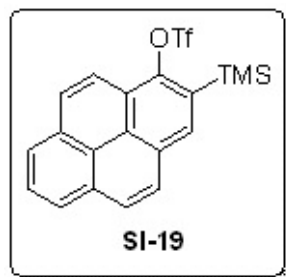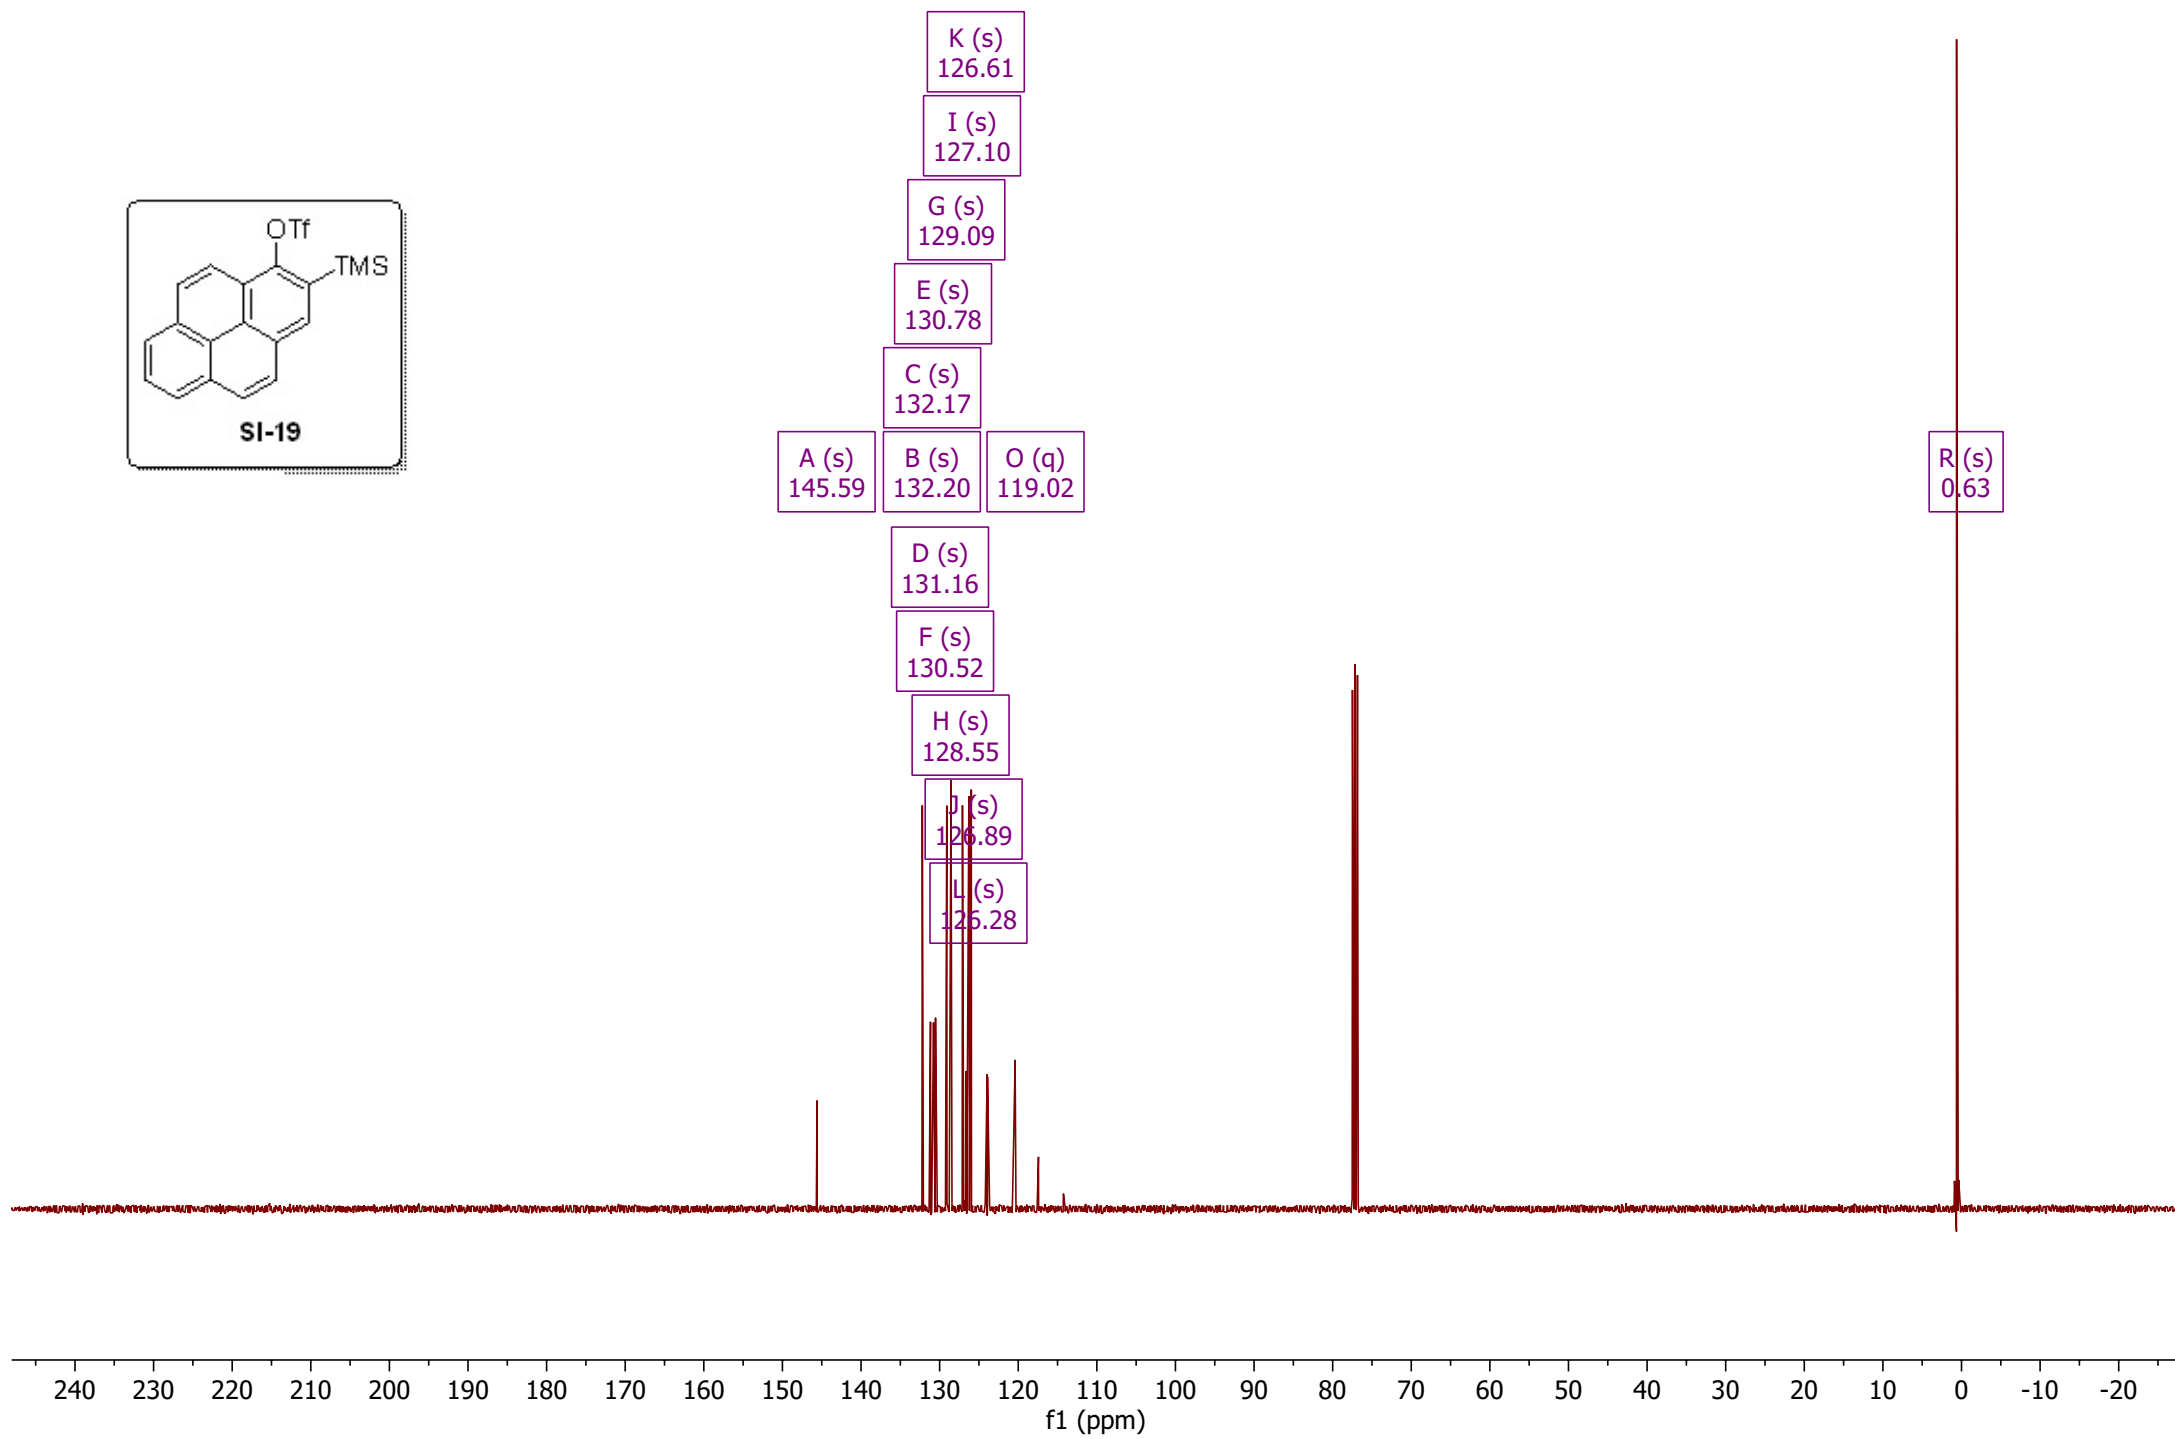



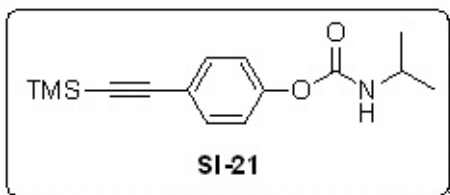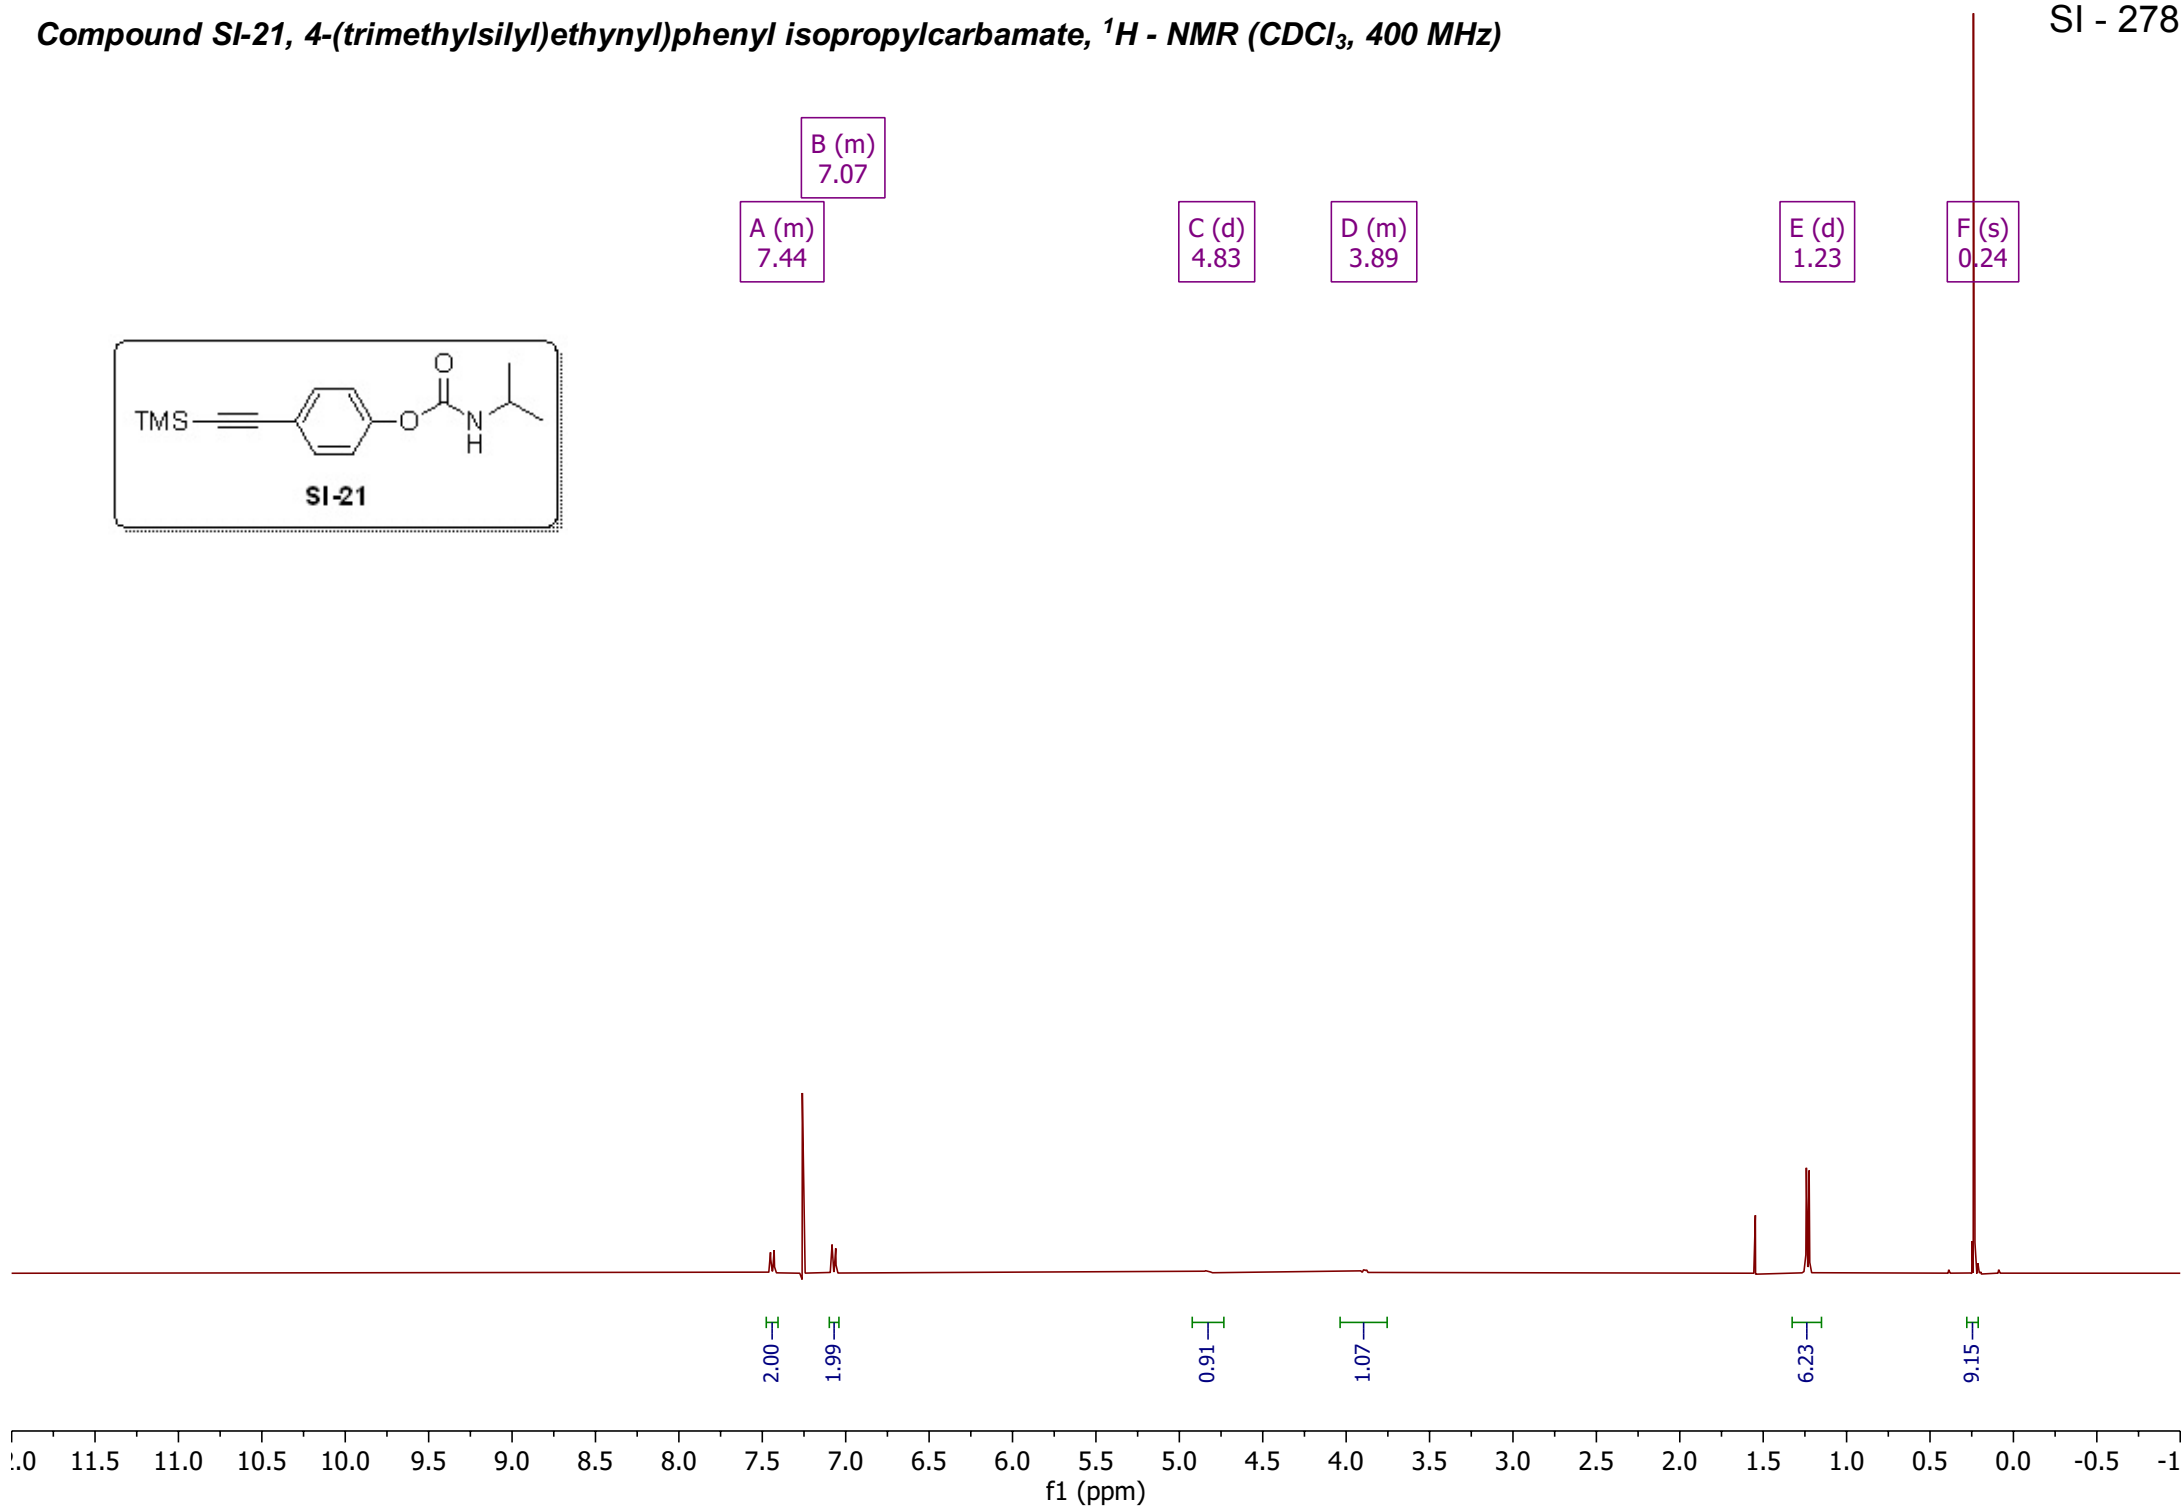

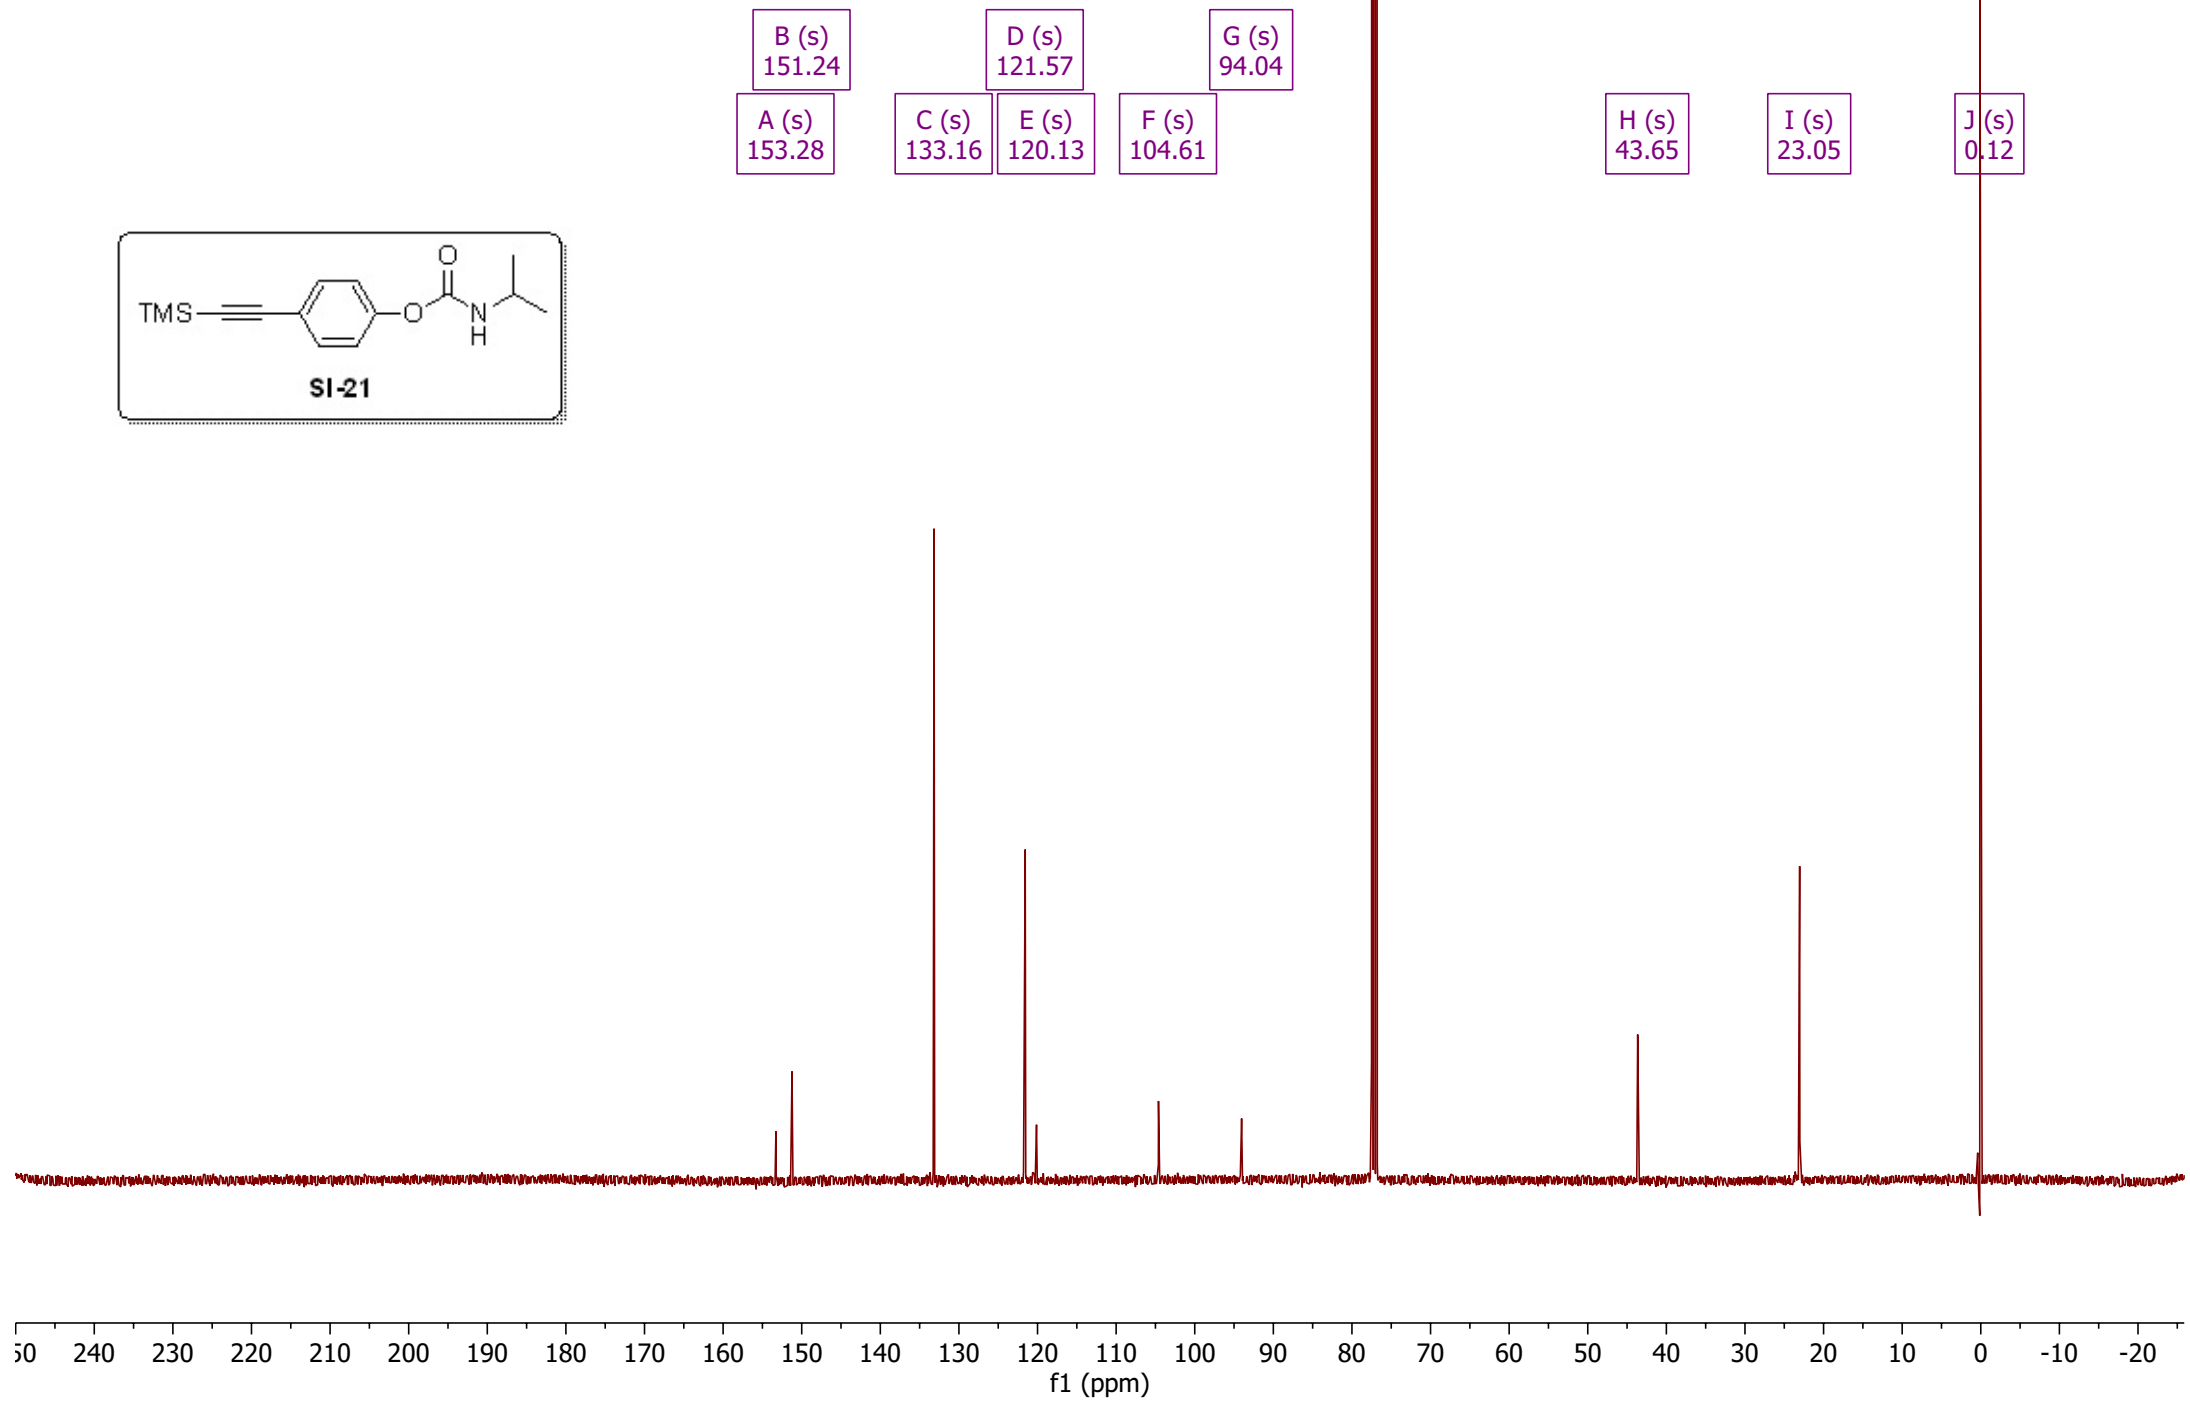

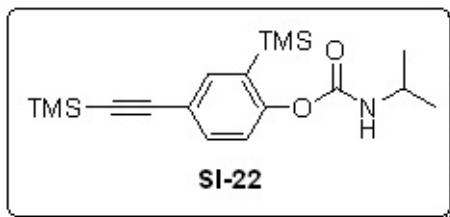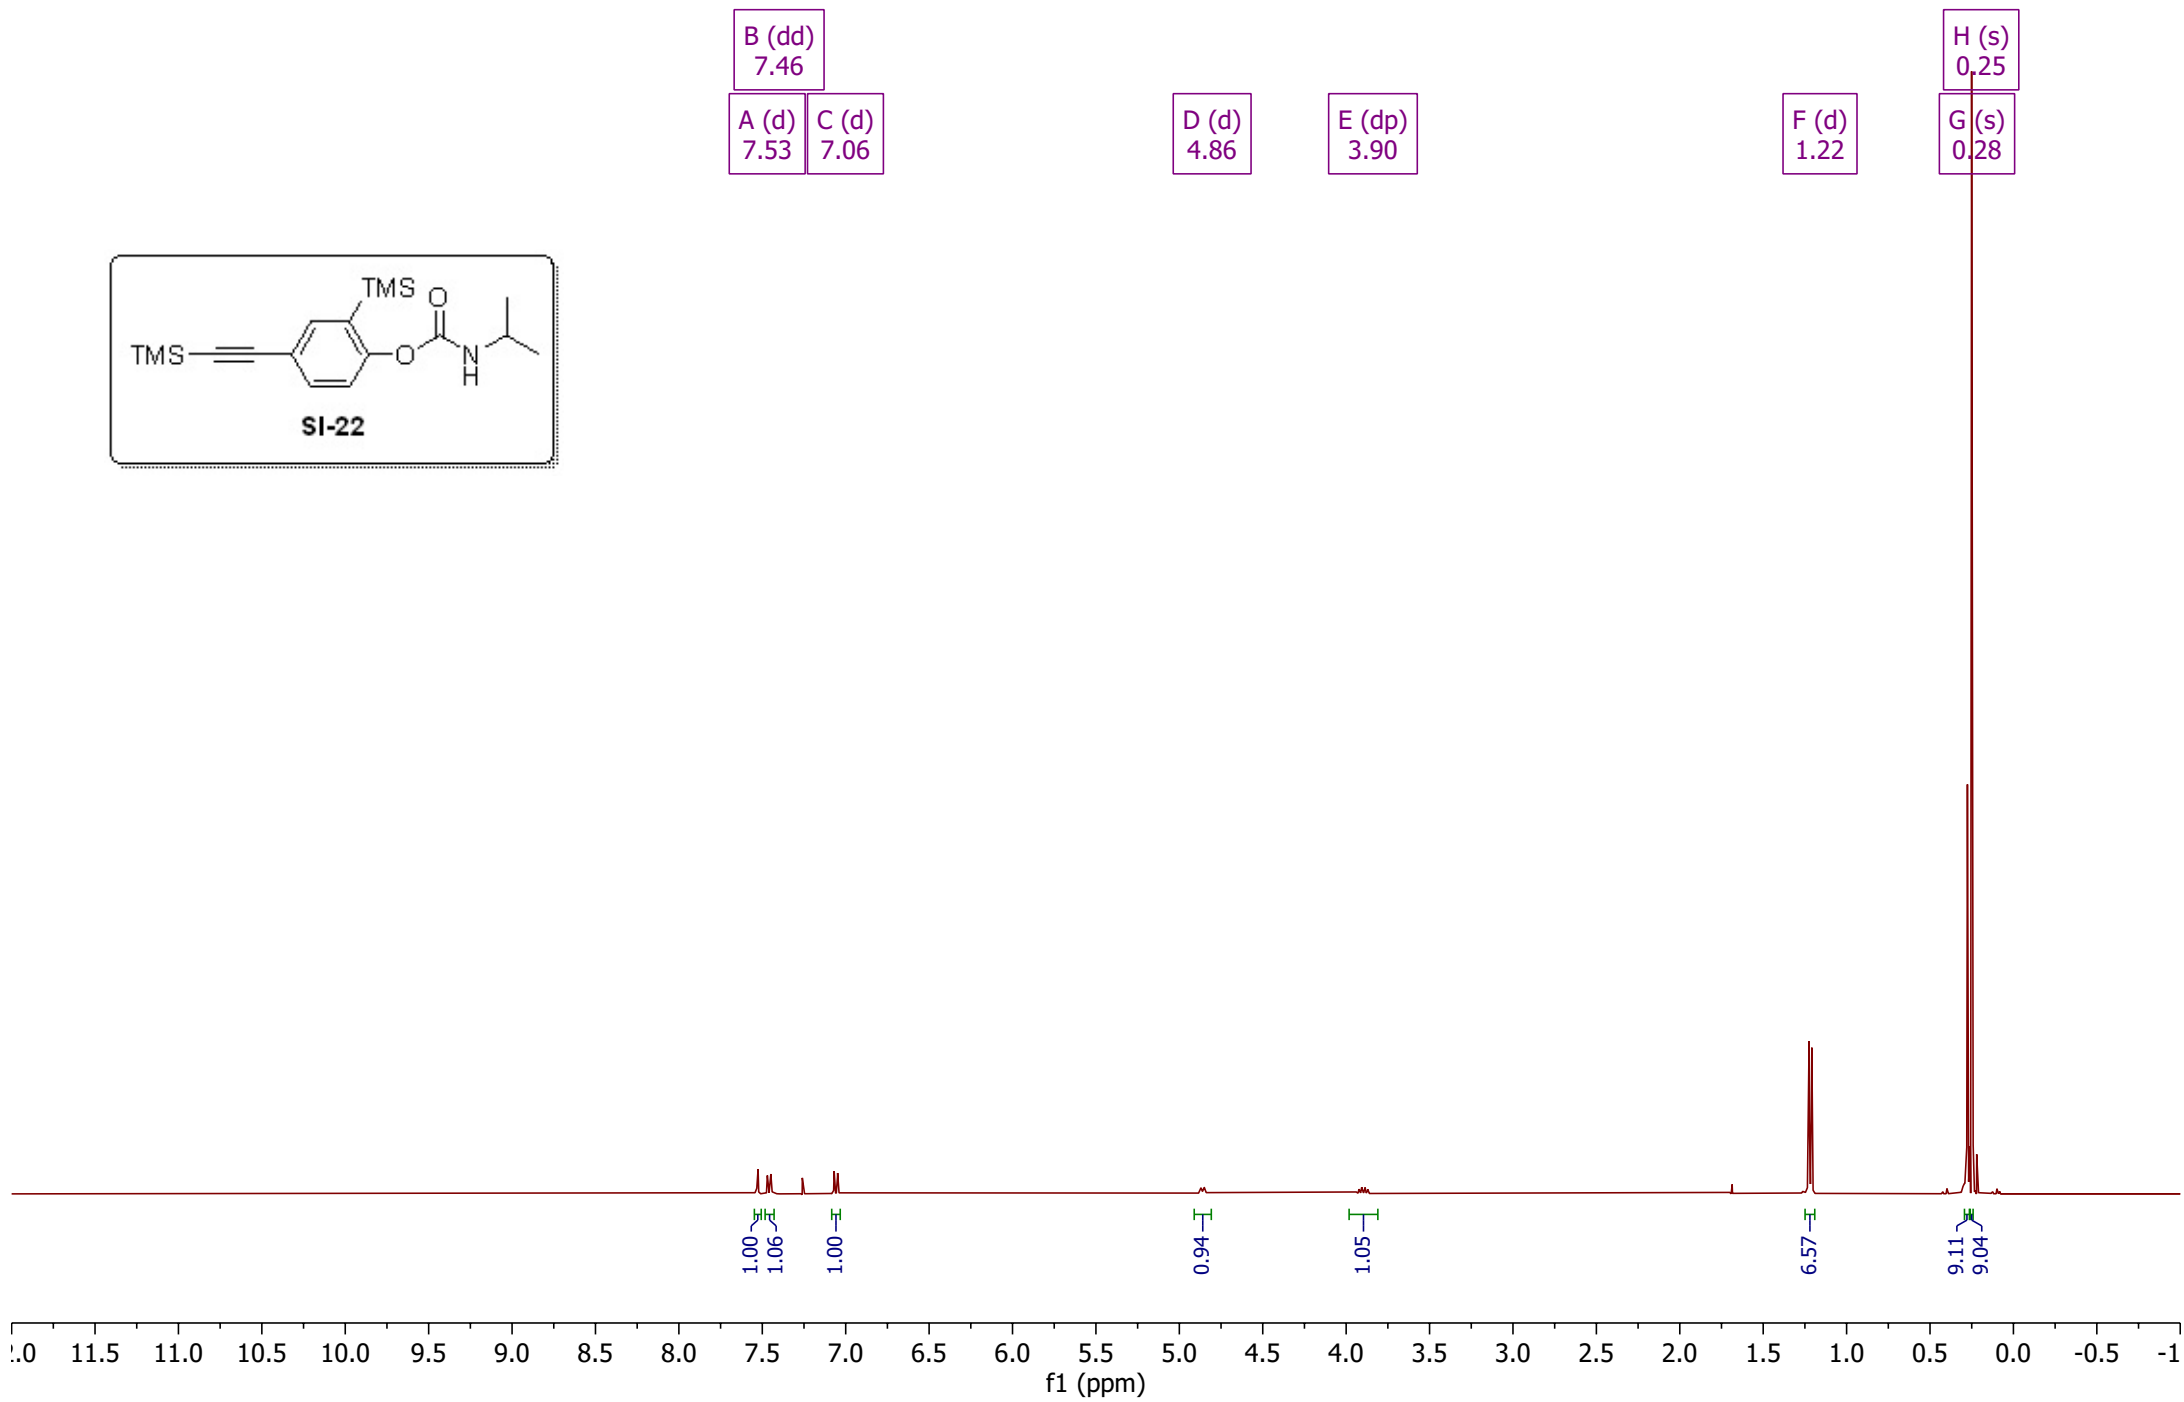



|        |        |        |        |       |
|--------|--------|--------|--------|-------|
| B (s)  | D (s)  | G (s)  | I (s)  | M (s) |
| 153.44 | 134.02 | 119.97 | 93.82  | -0.87 |
| A (s)  | C (s)  | F (s)  | H (s)  | J (s) |
| 155.66 | 138.64 | 122.18 | 105.04 | 43.57 |
|        | E (s)  |        |        | K (s) |
|        | 132.08 |        |        | 23.01 |
|        |        |        |        | L (s) |
|        |        |        |        | 0.13  |

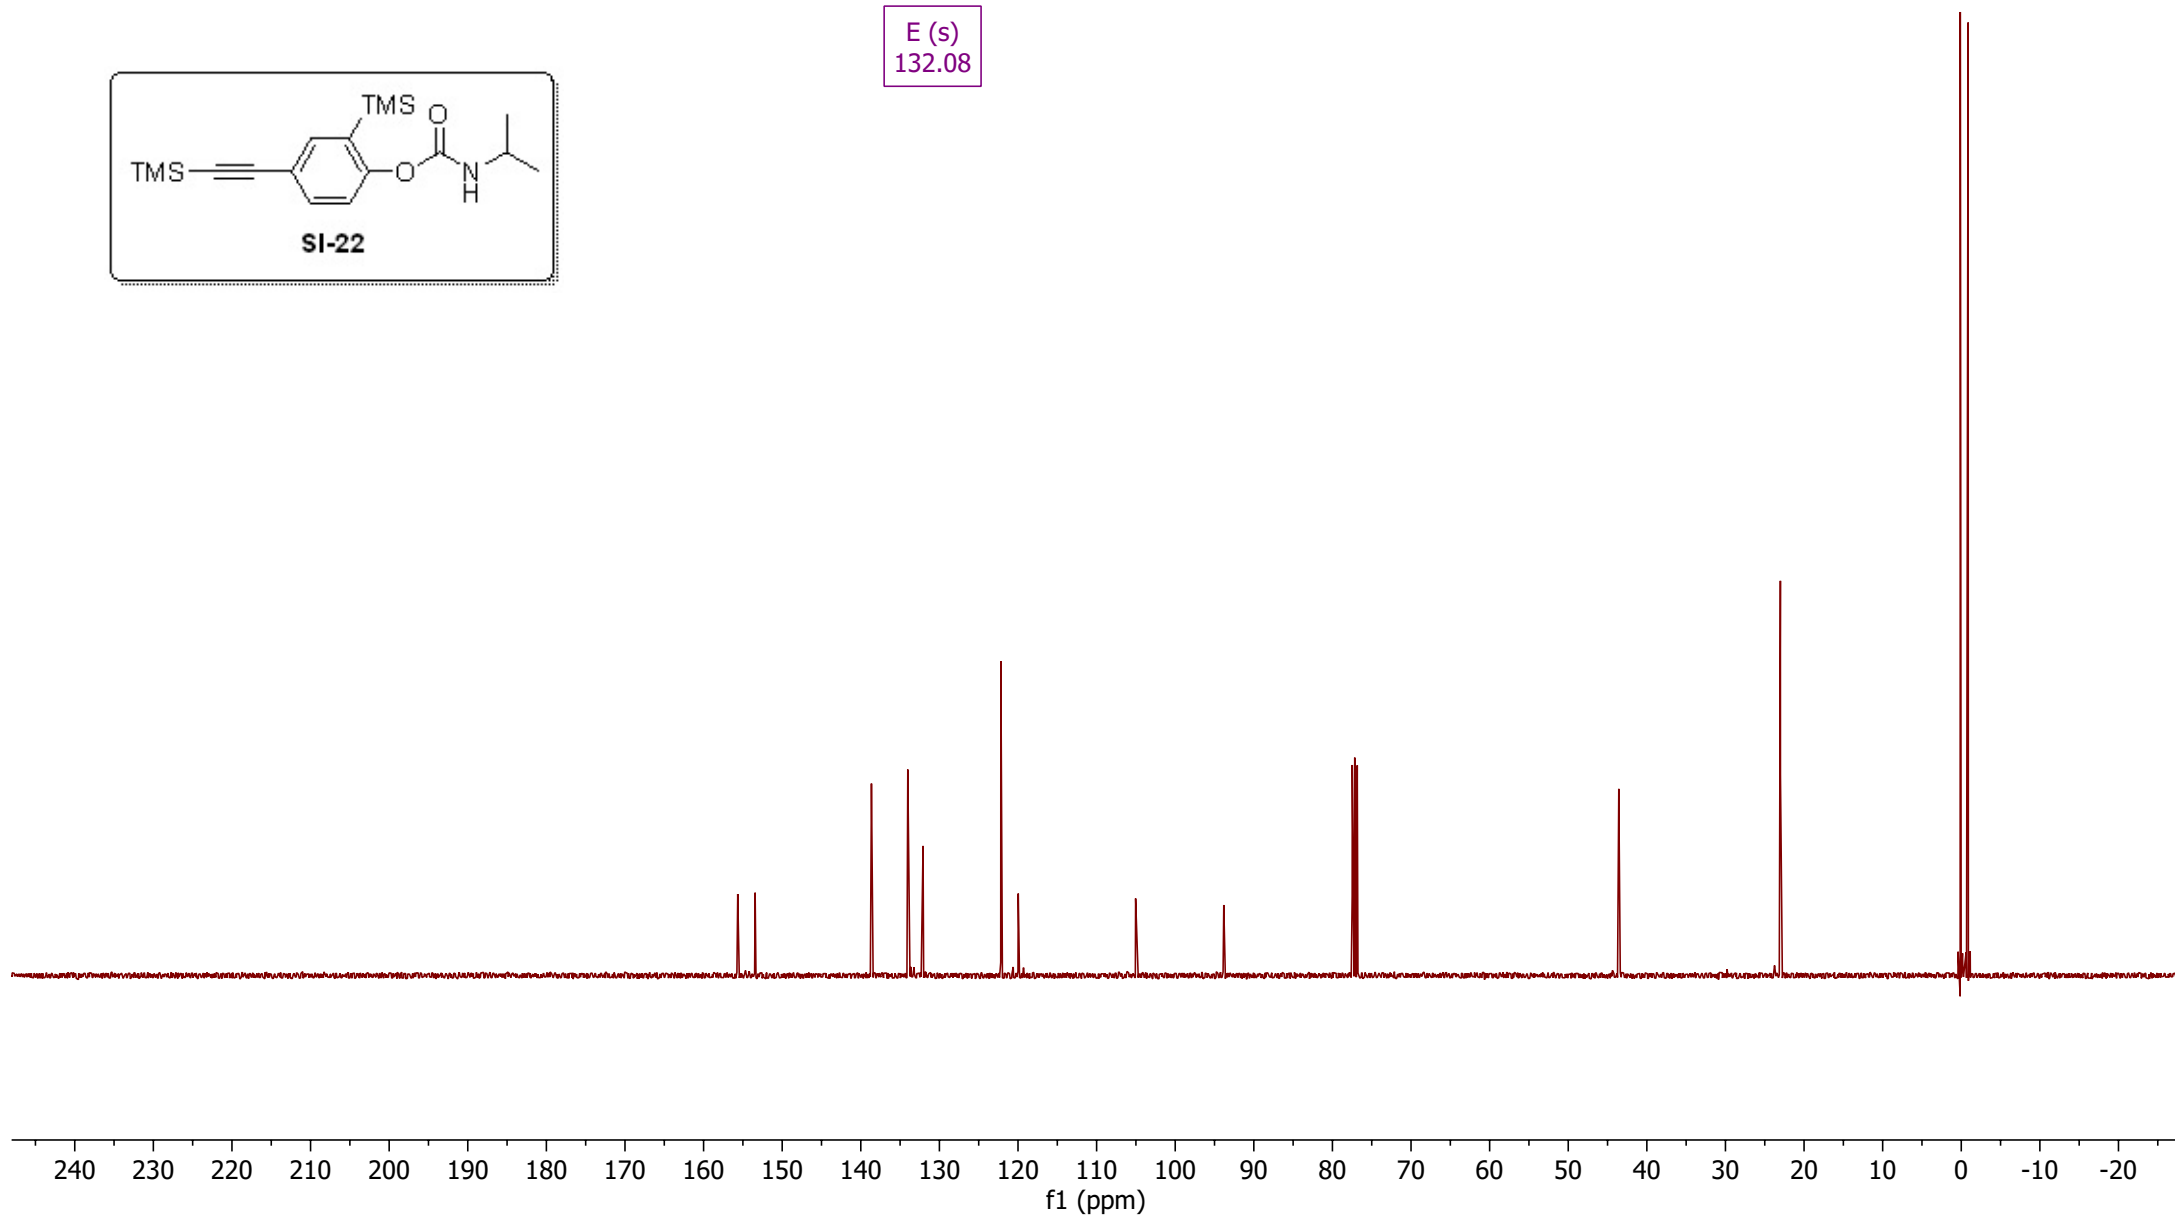

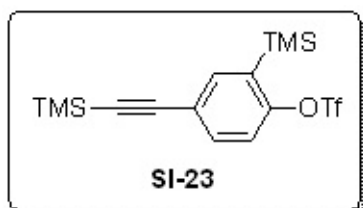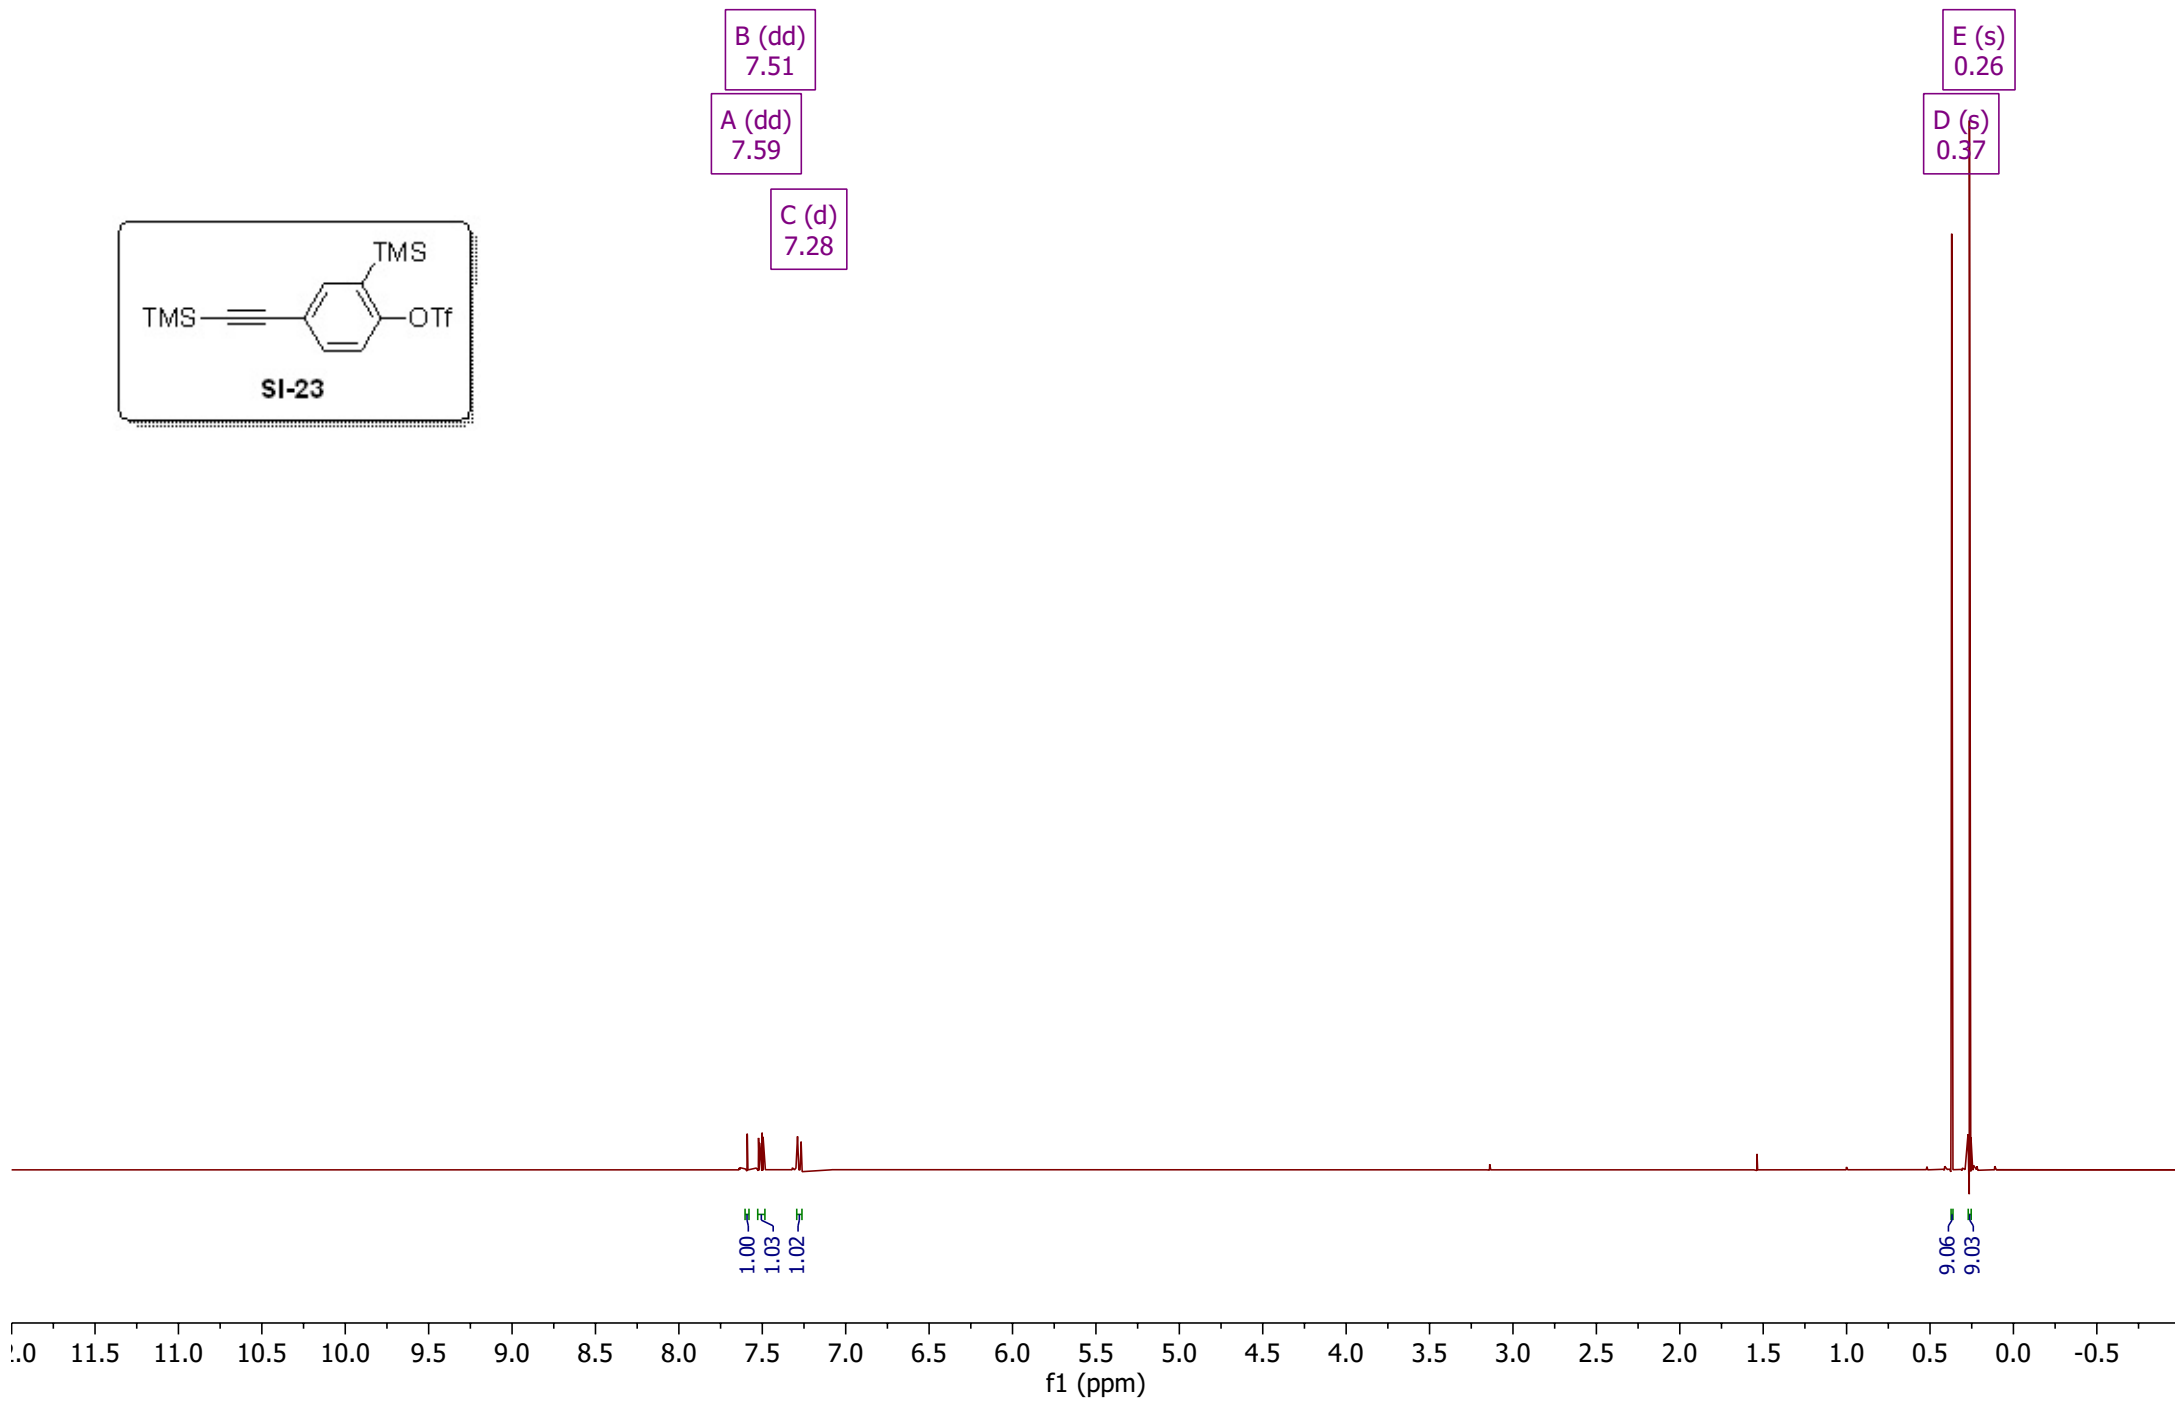

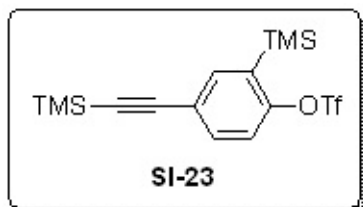

A (s)  
-73.83

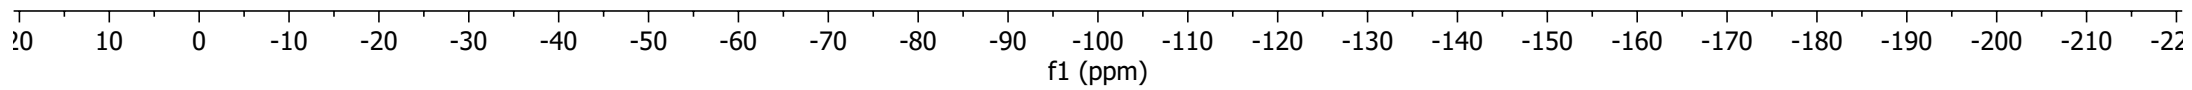

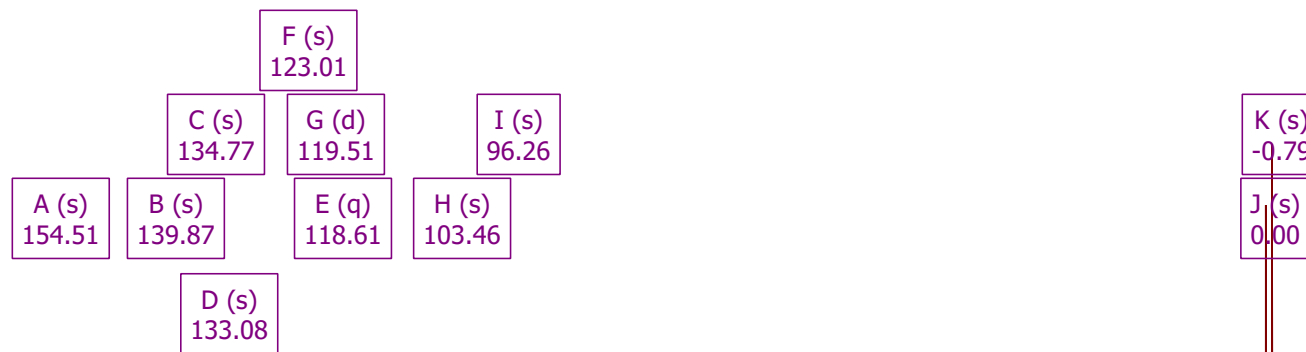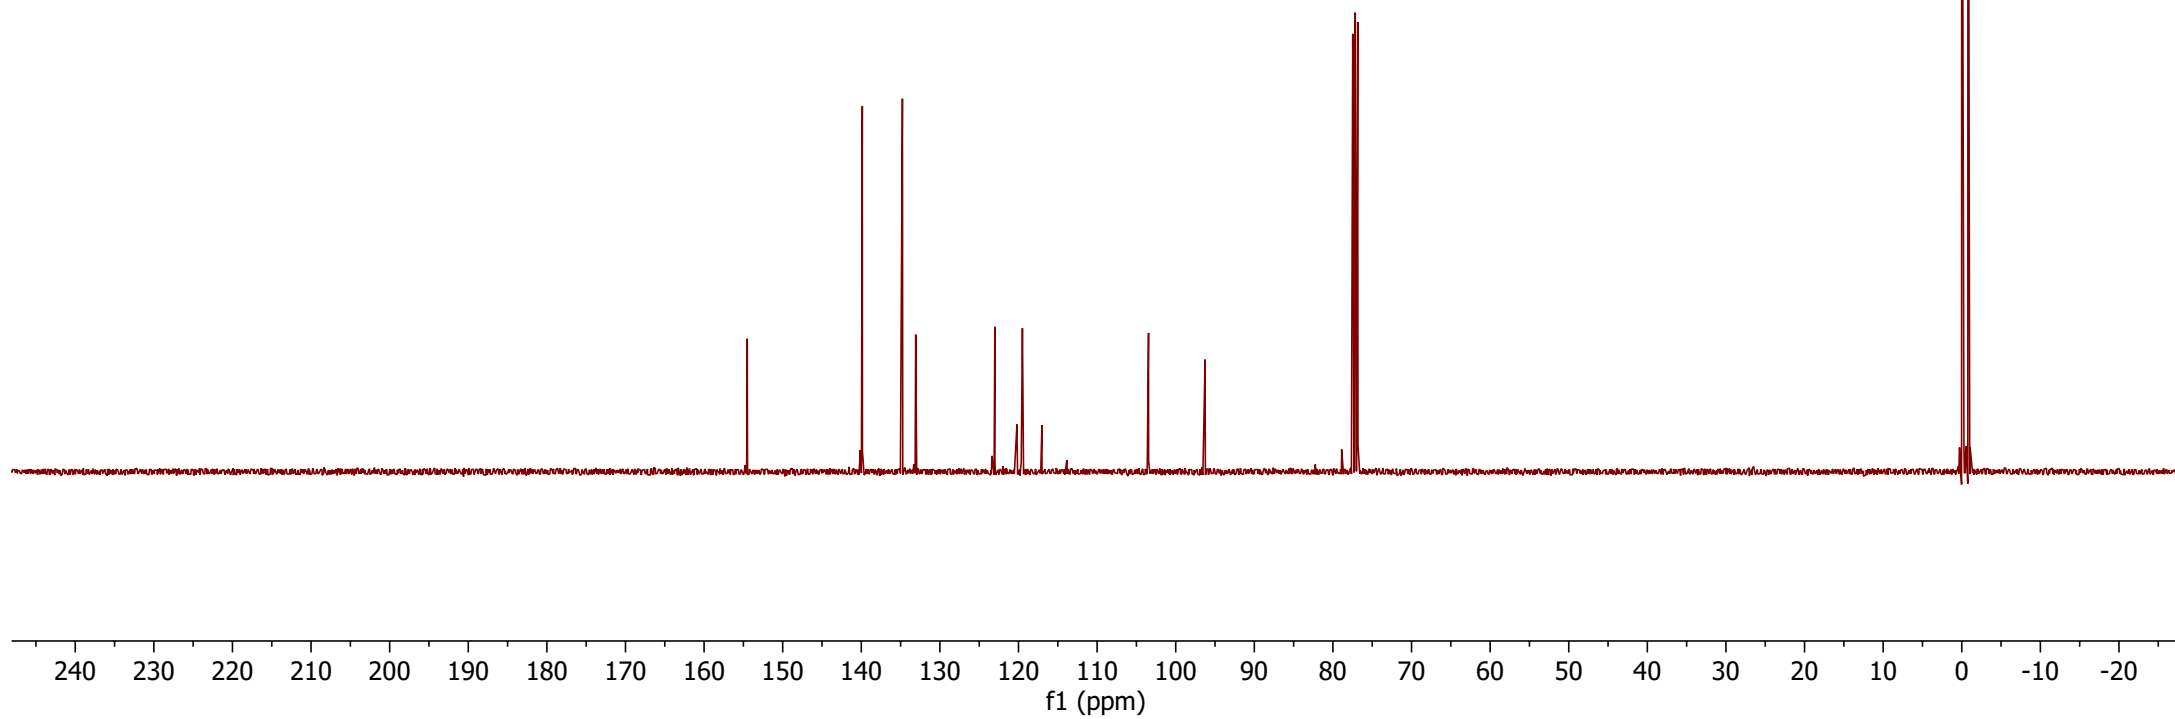

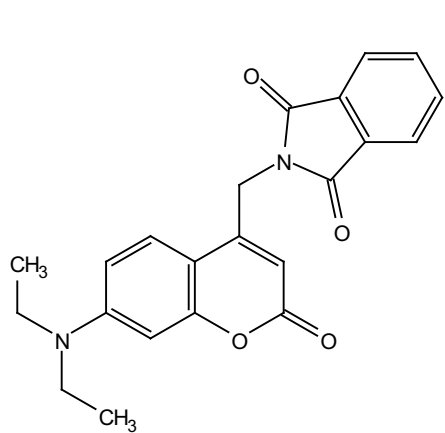

SI-25

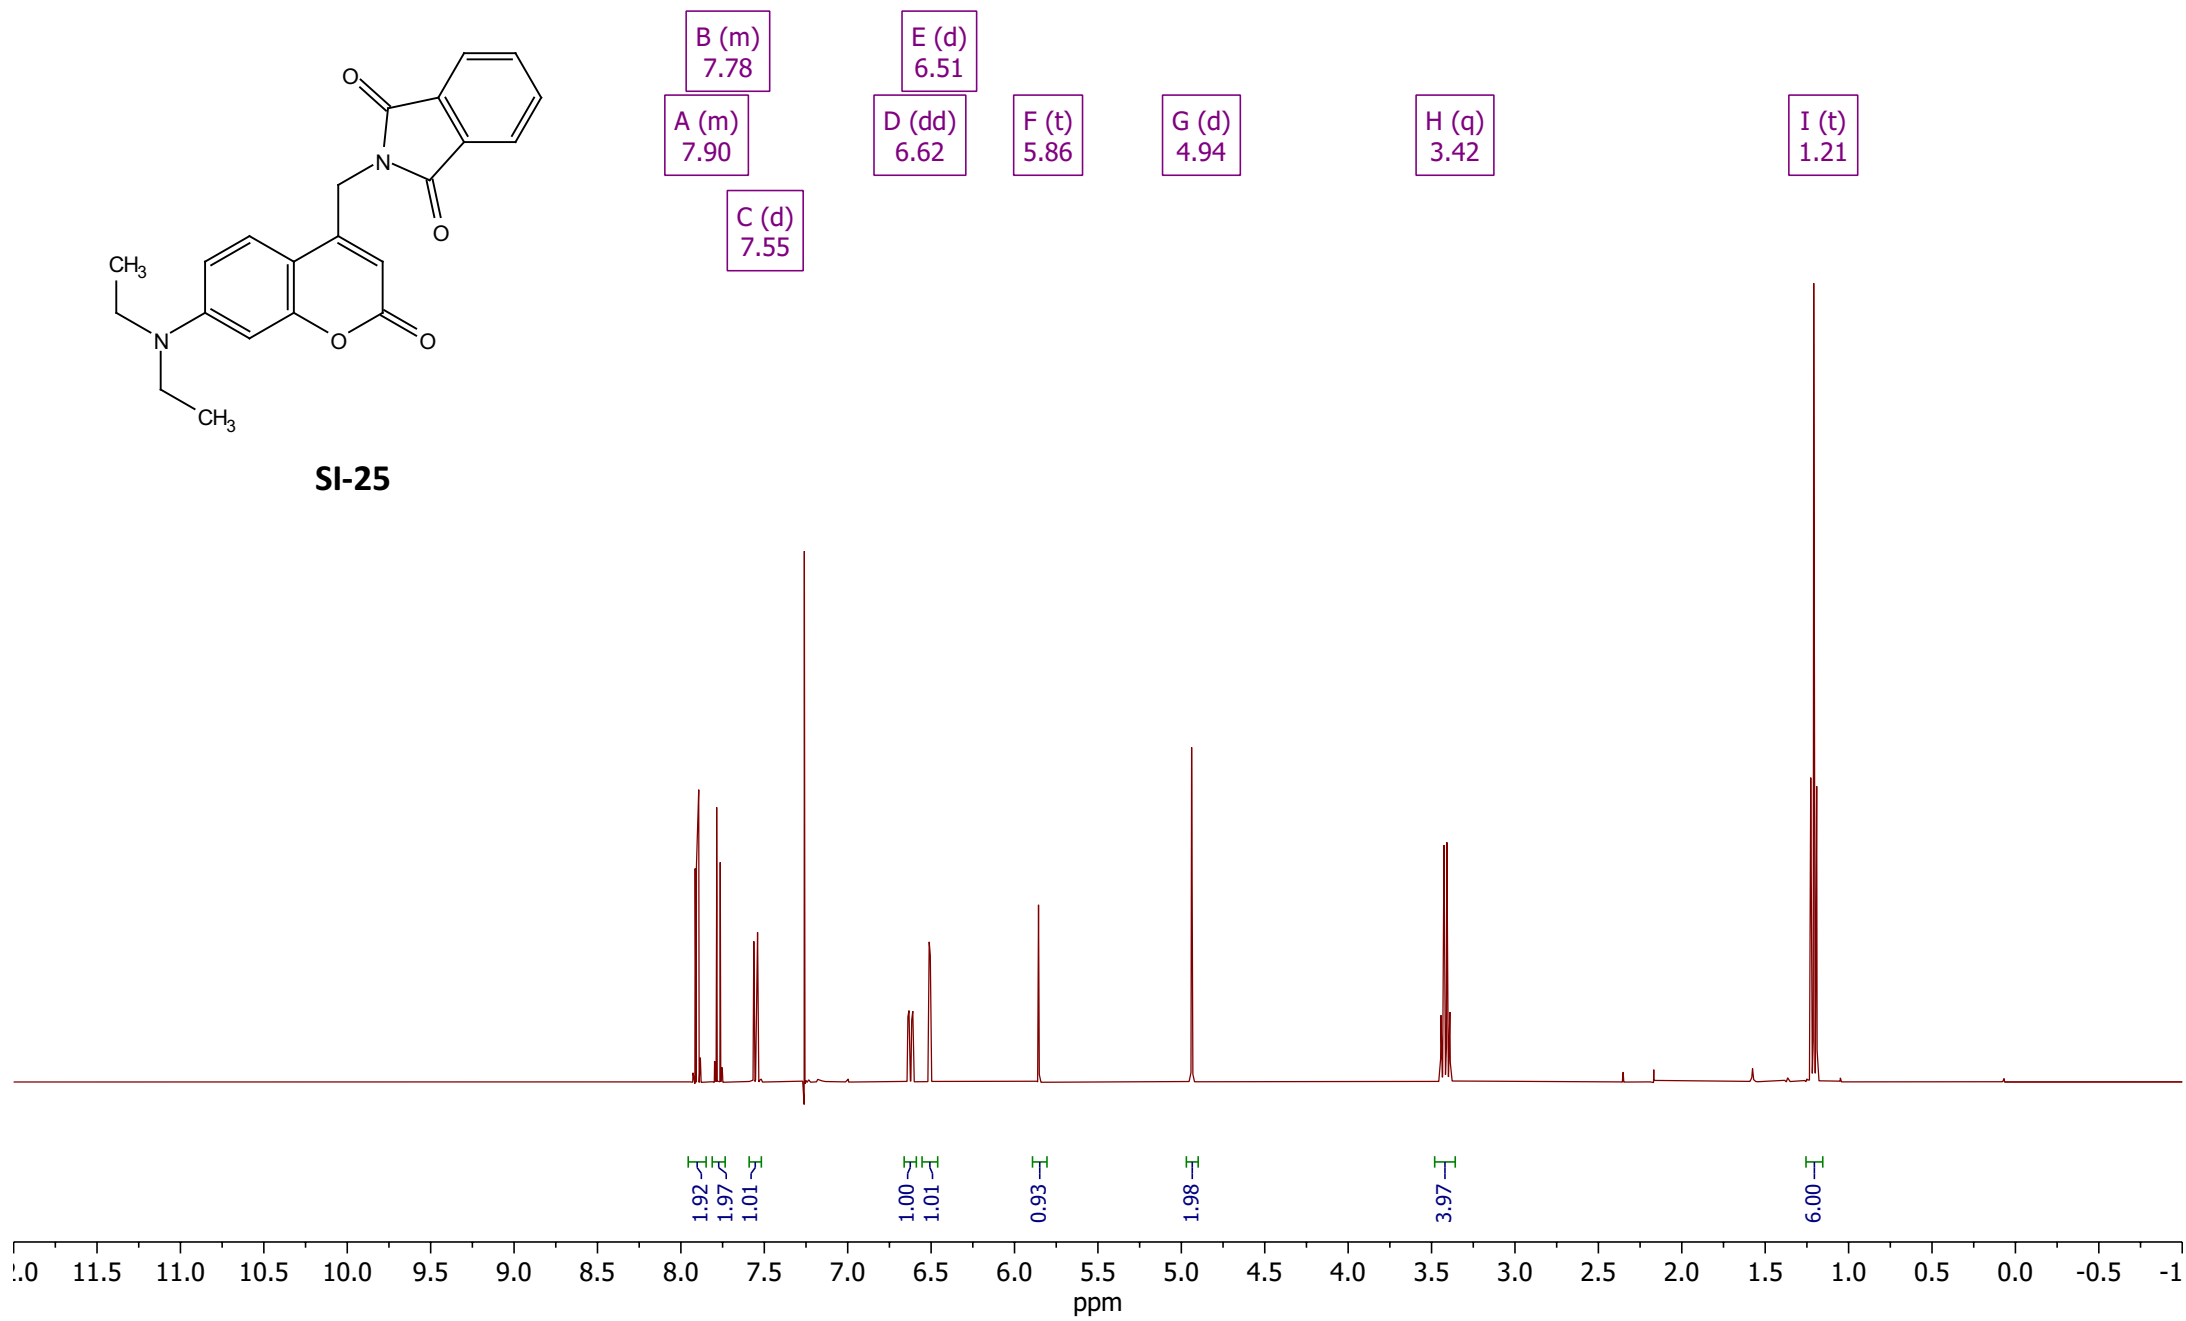



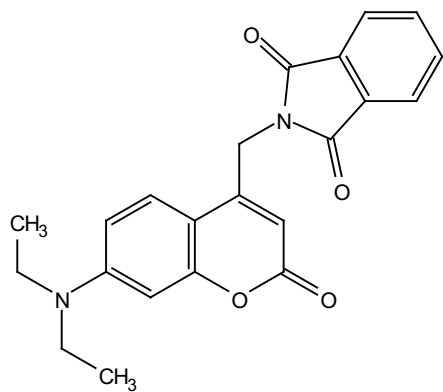

SI-25

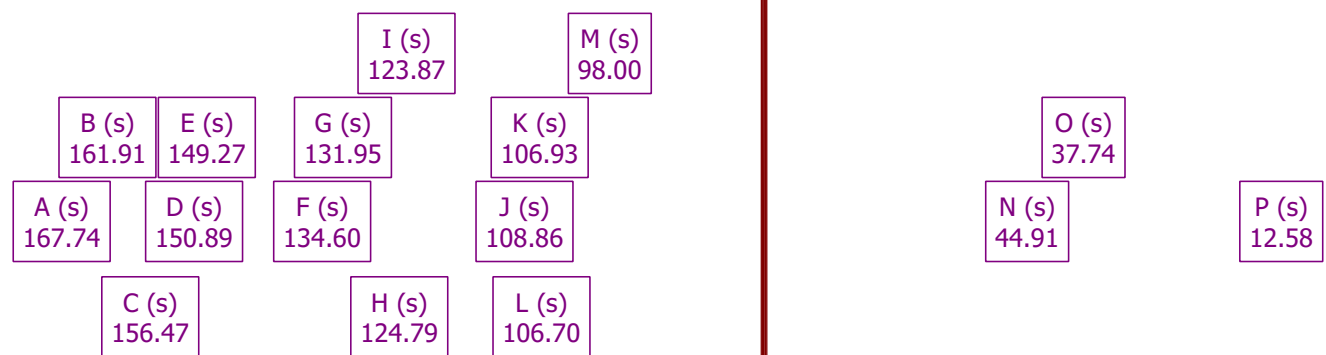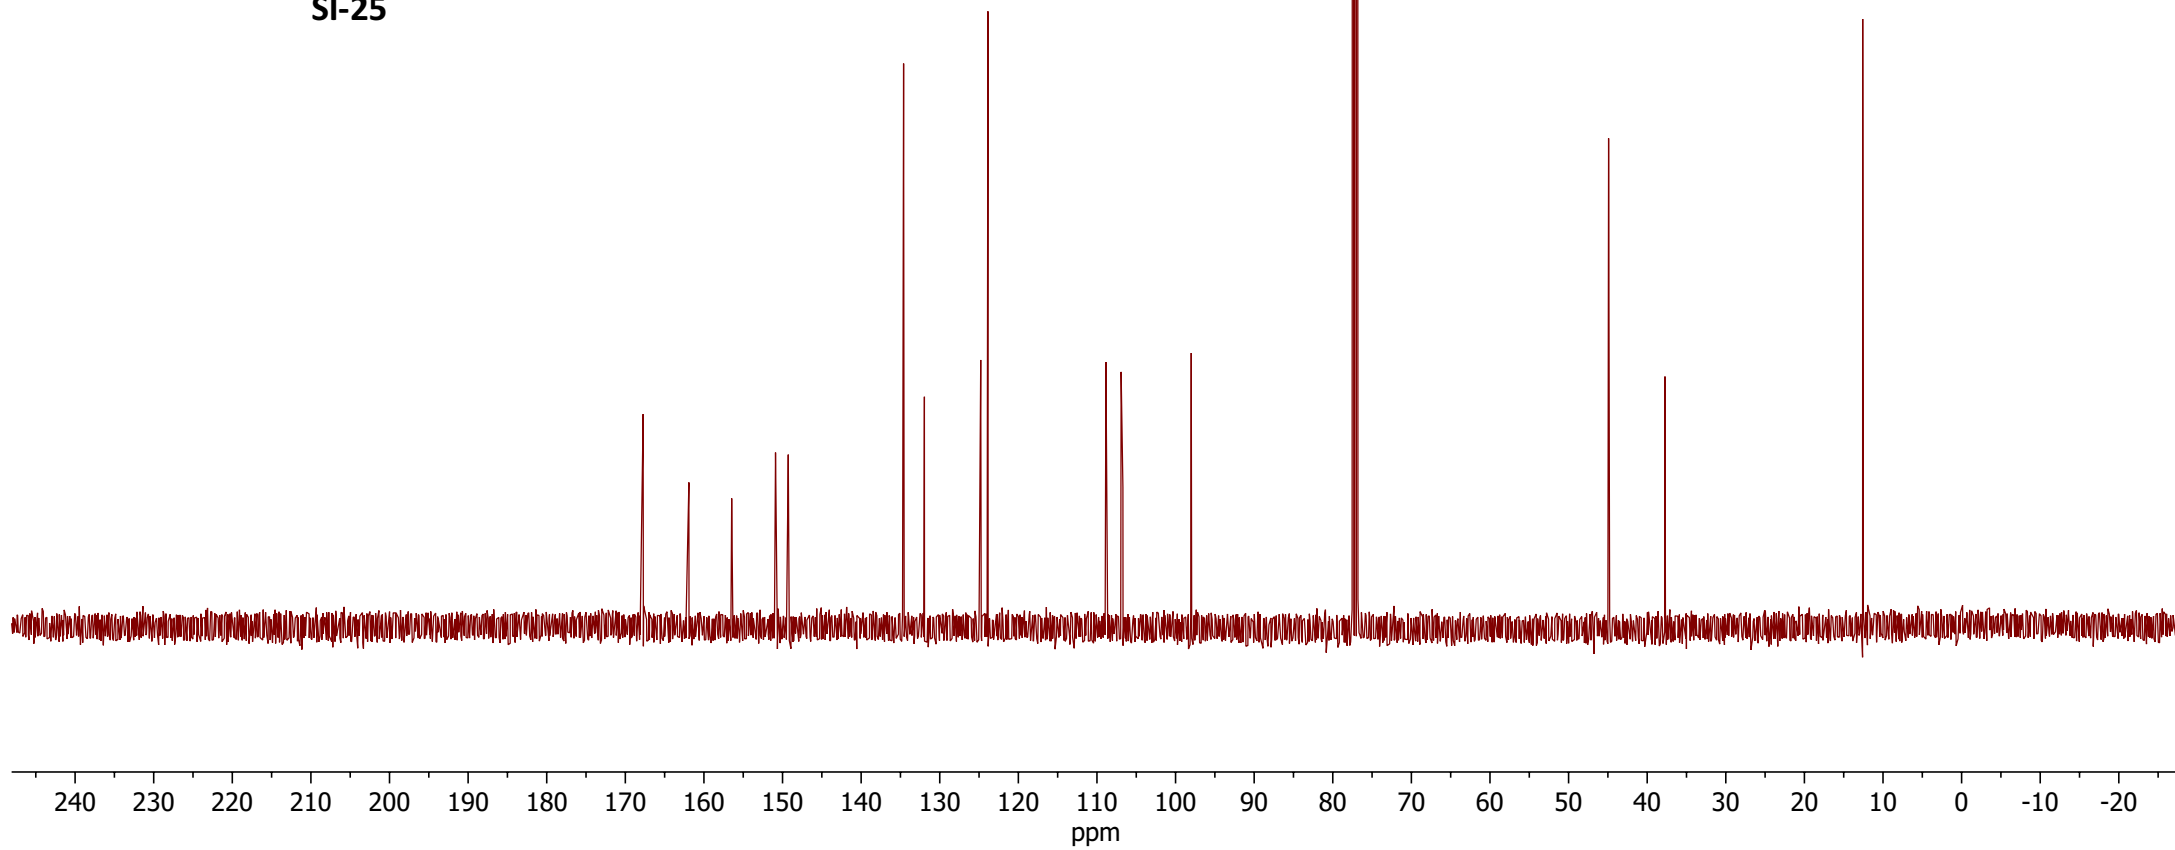

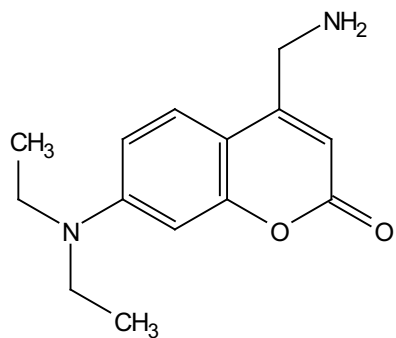

SI-26

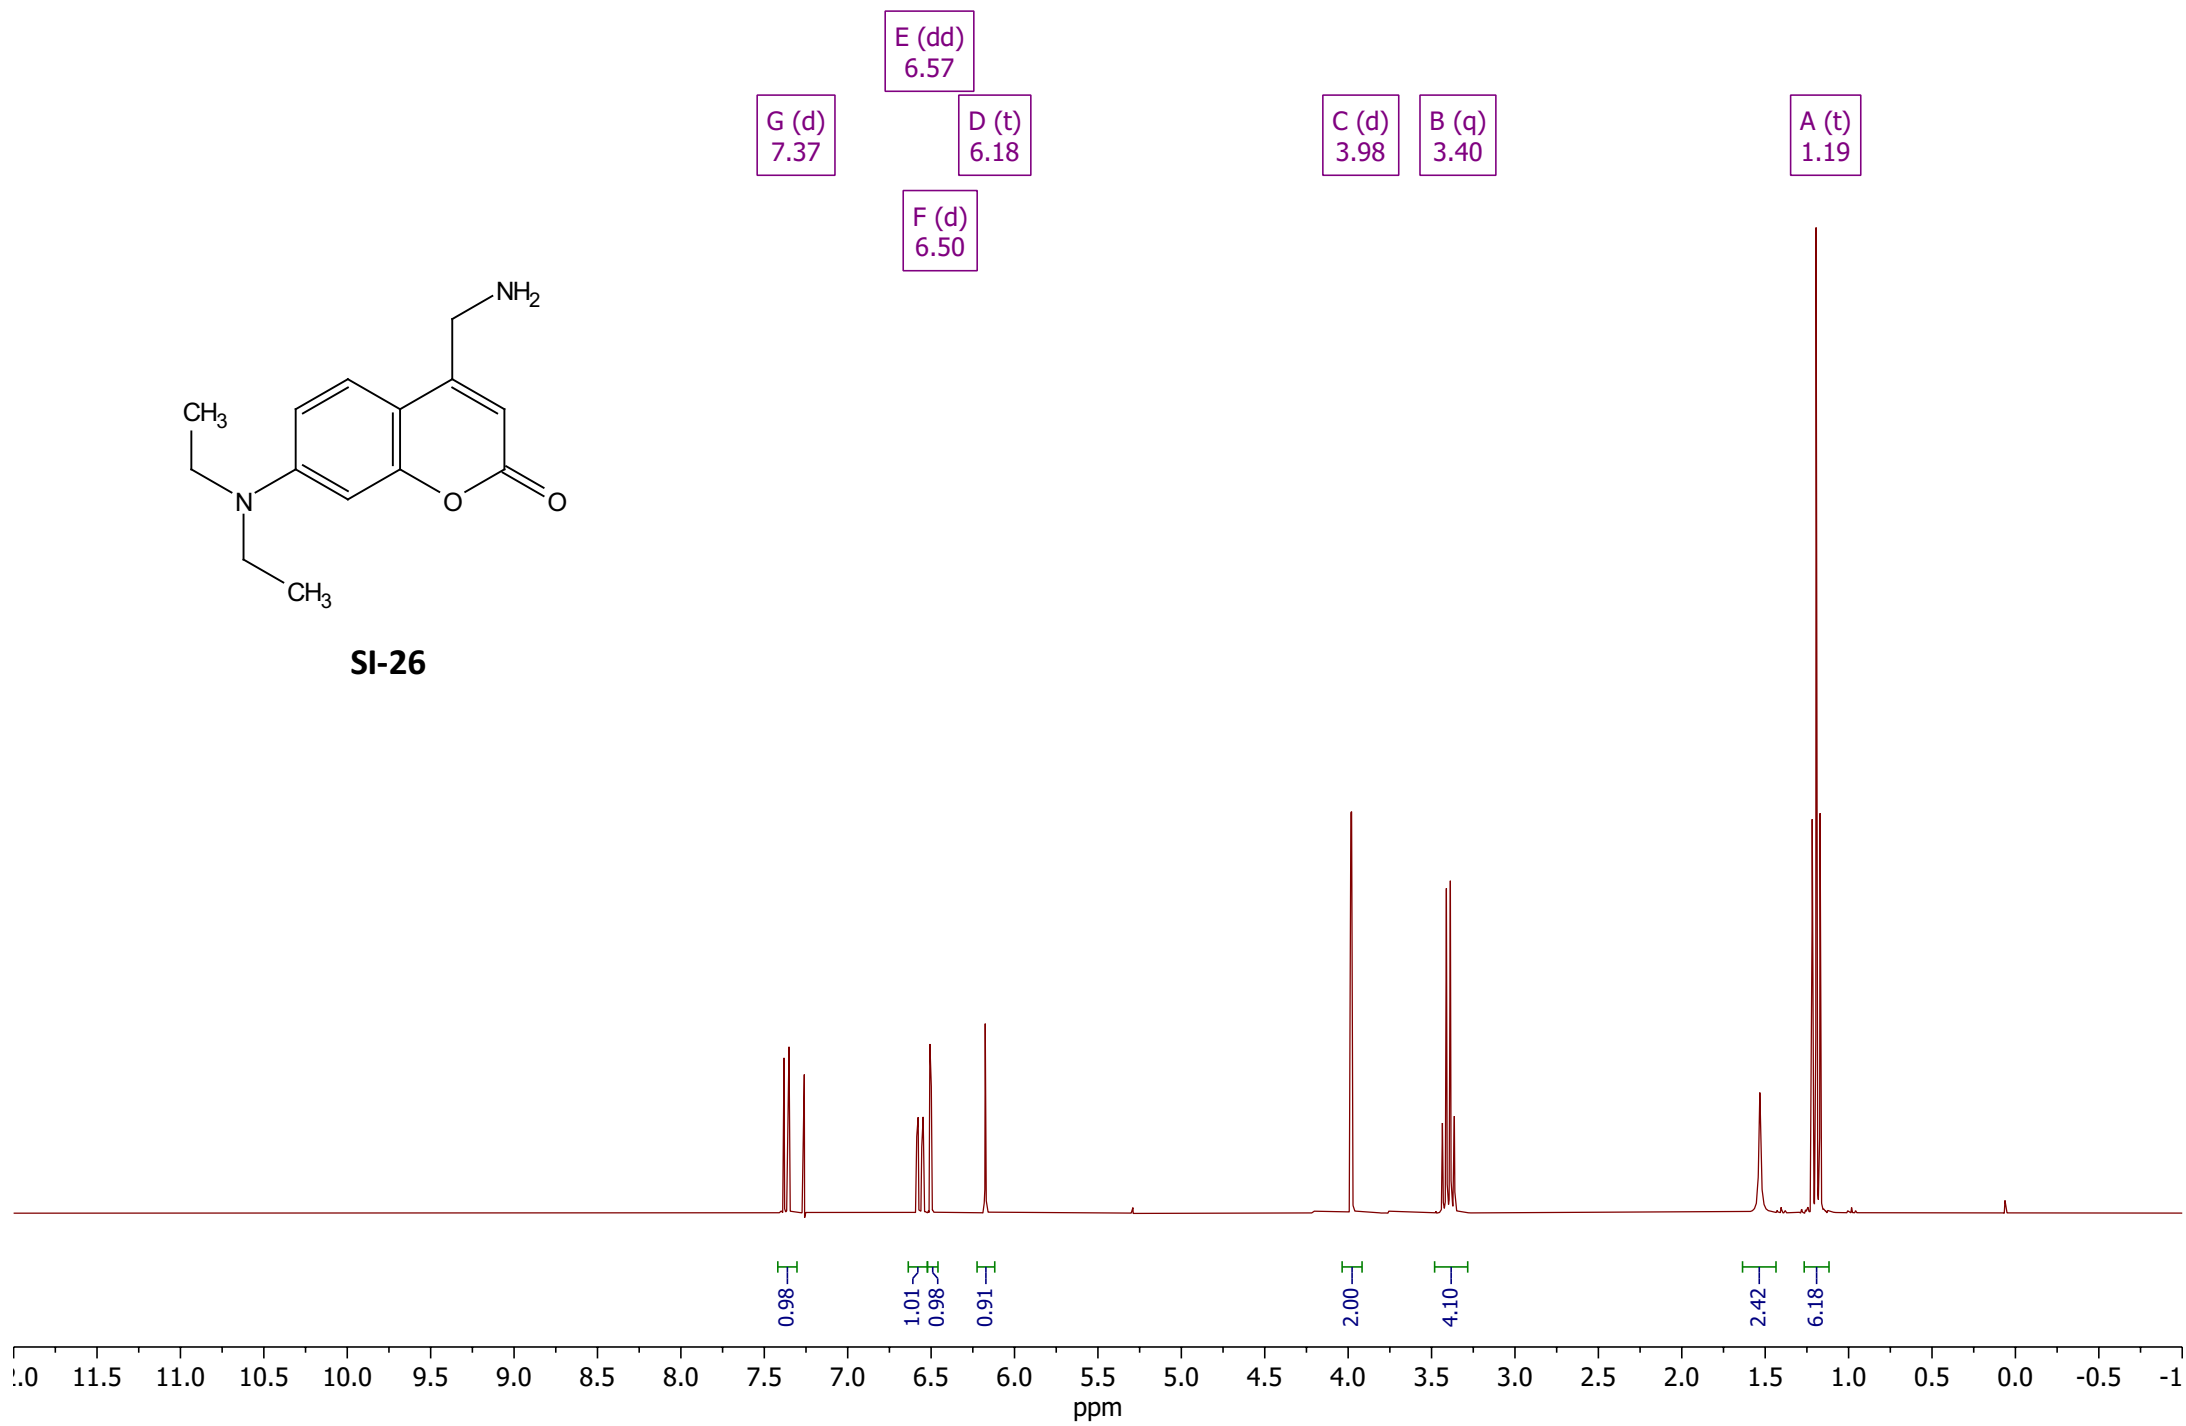



SI-26

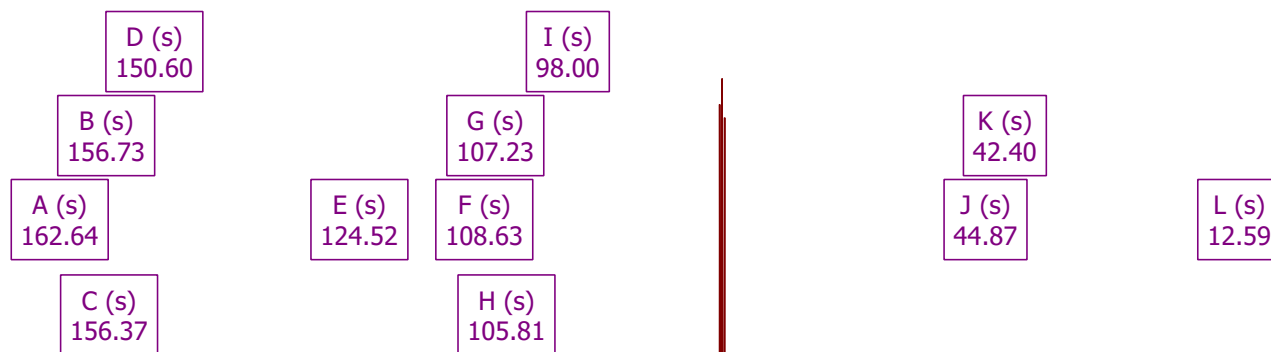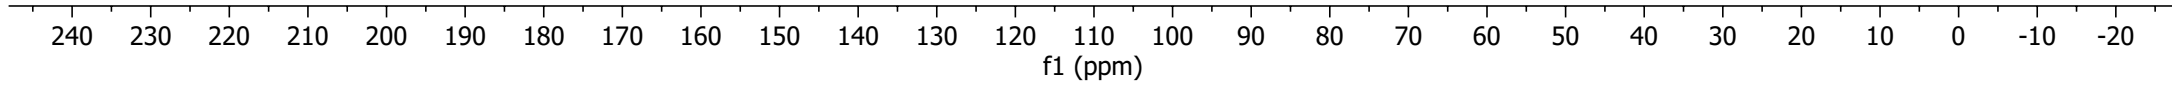

# ***13. MS – spectra***

*(aligned according to molecule numbering)*

**HRMS (ESI) Analysis of compound 27: phenyl phosphate**

wejea76shr1 #1 RT: 0.02 AV: 1 NL: 1.16E8  
T: FTMS - p ESI Full lock ms [50.00-600.00]

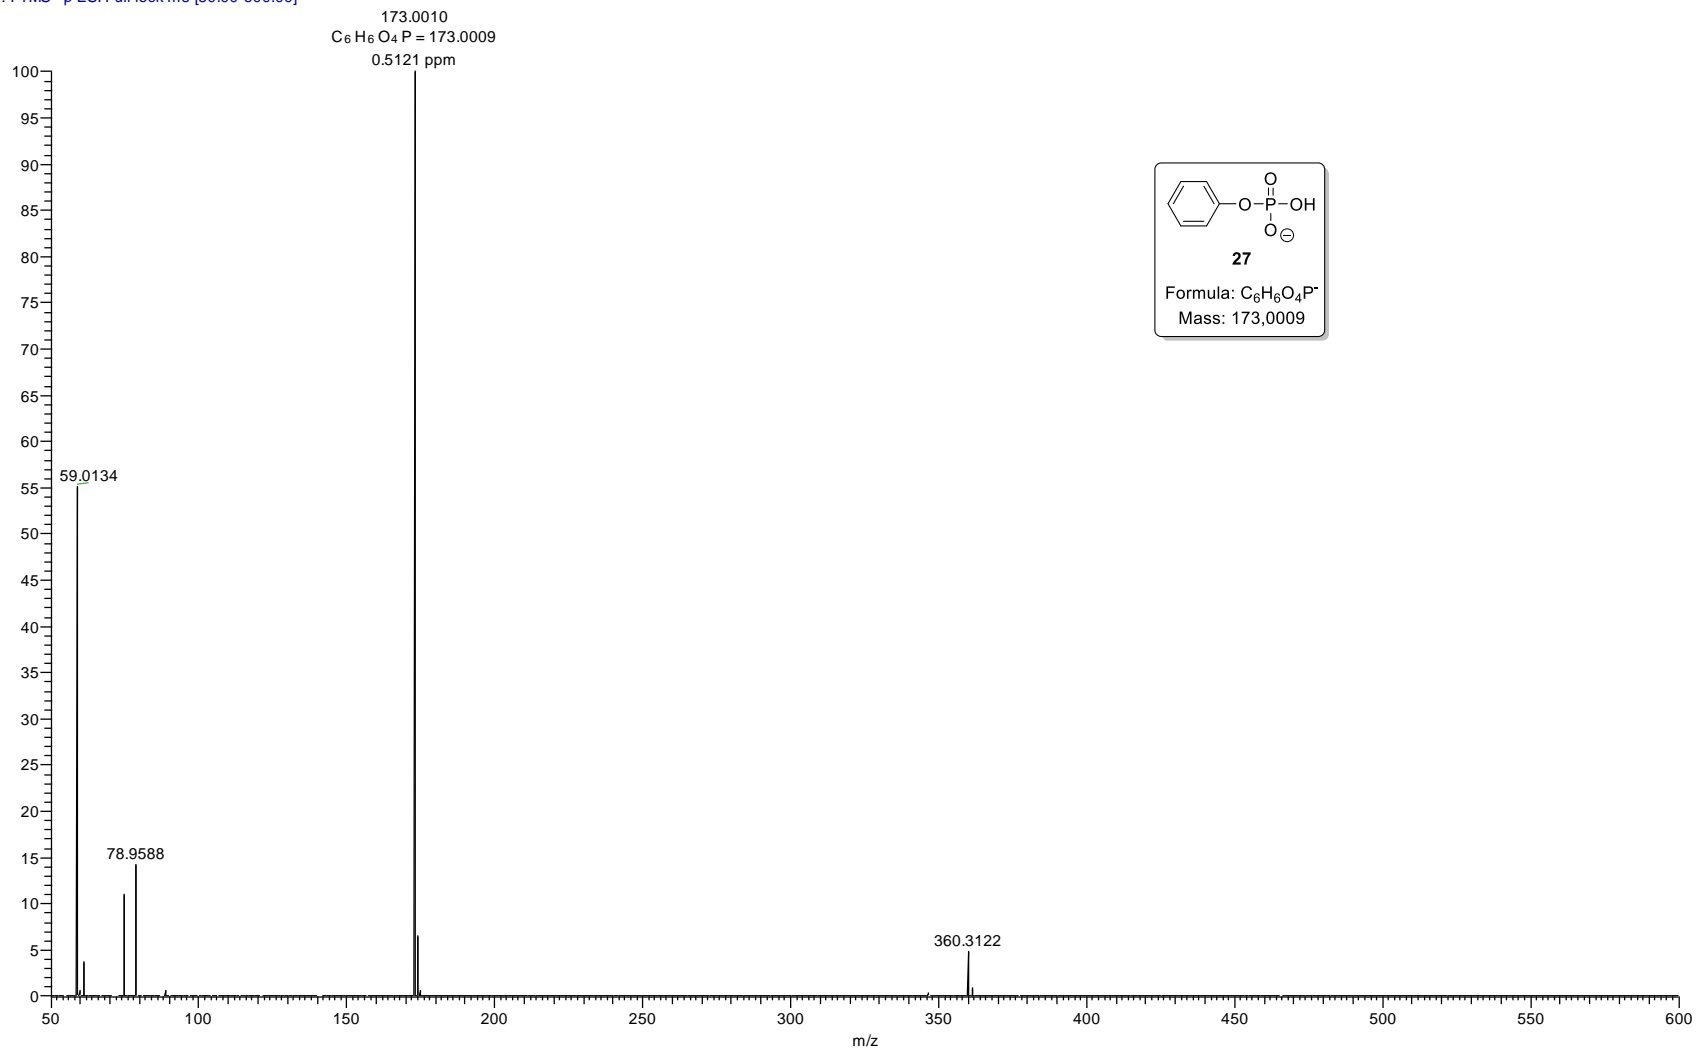

**HRMS (APCI) Analysis of compound 28: 2-naphthalen-2-yl phosphate**

wejea42thr4 #1 RT: 0.02 AV: 1 NL: 4.43E7  
T: FTMS - p APCI corona Full ms [80.00-700.00]

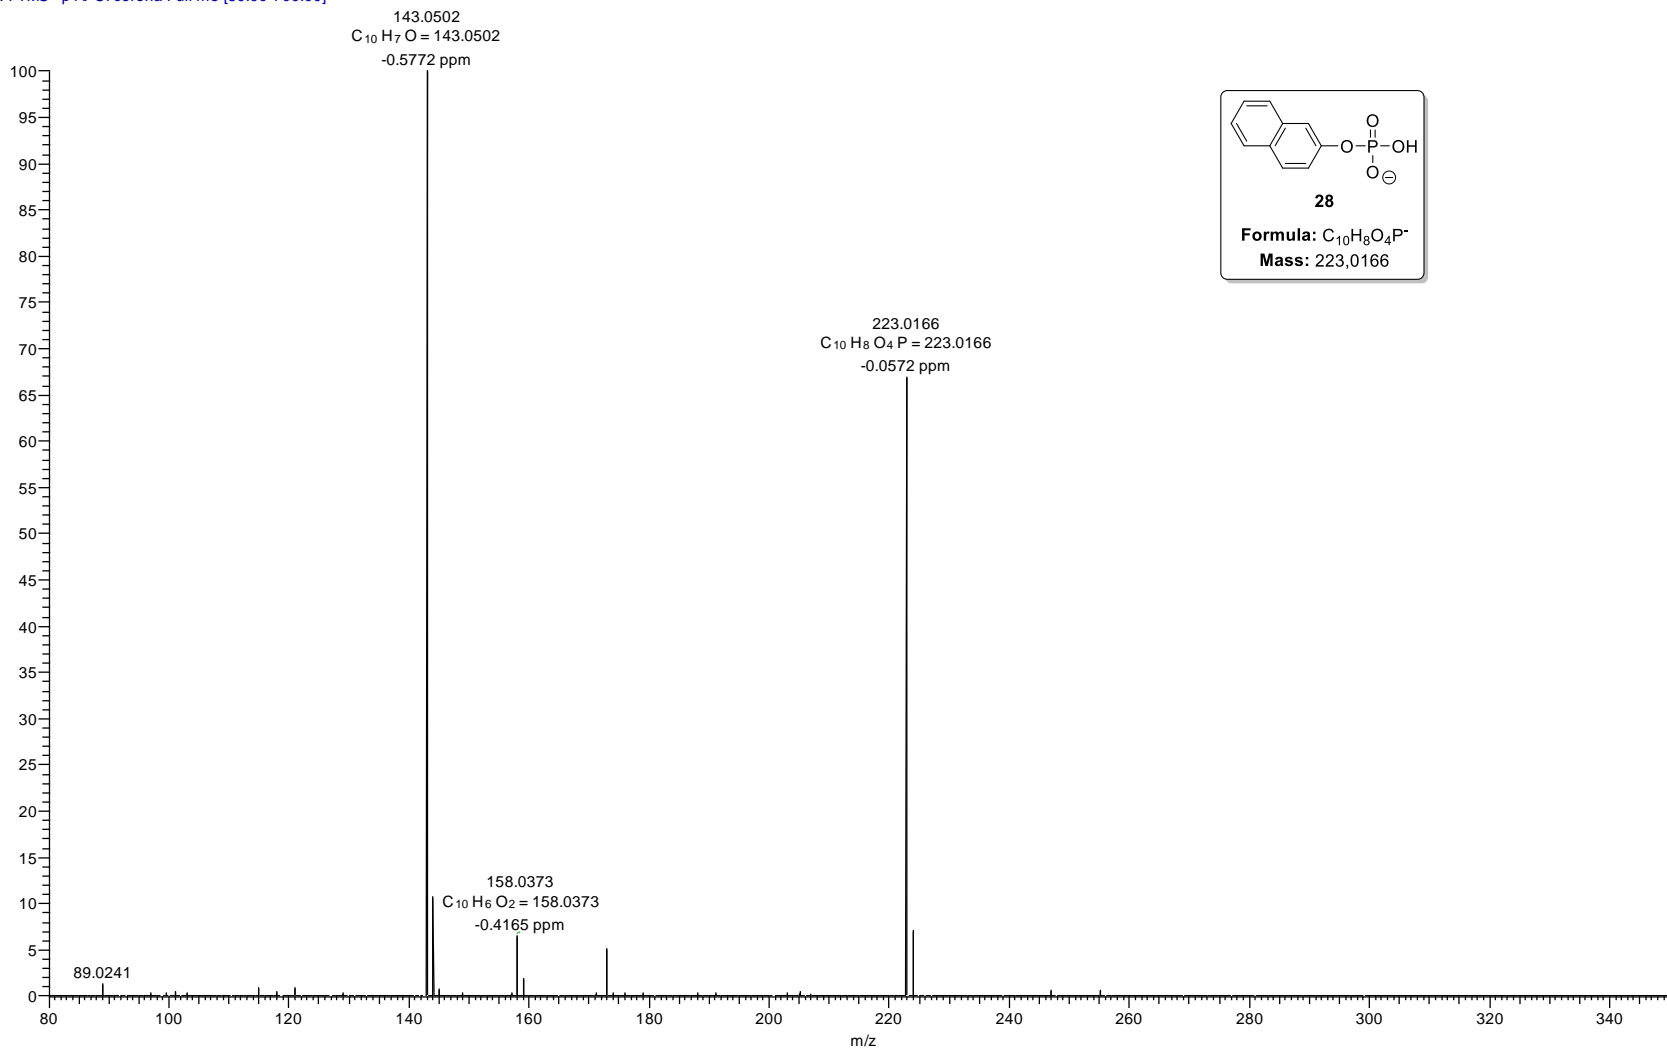

**HRMS (APCI) Analysis of compound 29: 3,4-dimethylphenyl phosphate**

wejea43thr6 #1 RT: 0.02 AV: 1 NL: 2.16E7  
T: FTMS - p APCI corona Full ms [80.00-700.00]

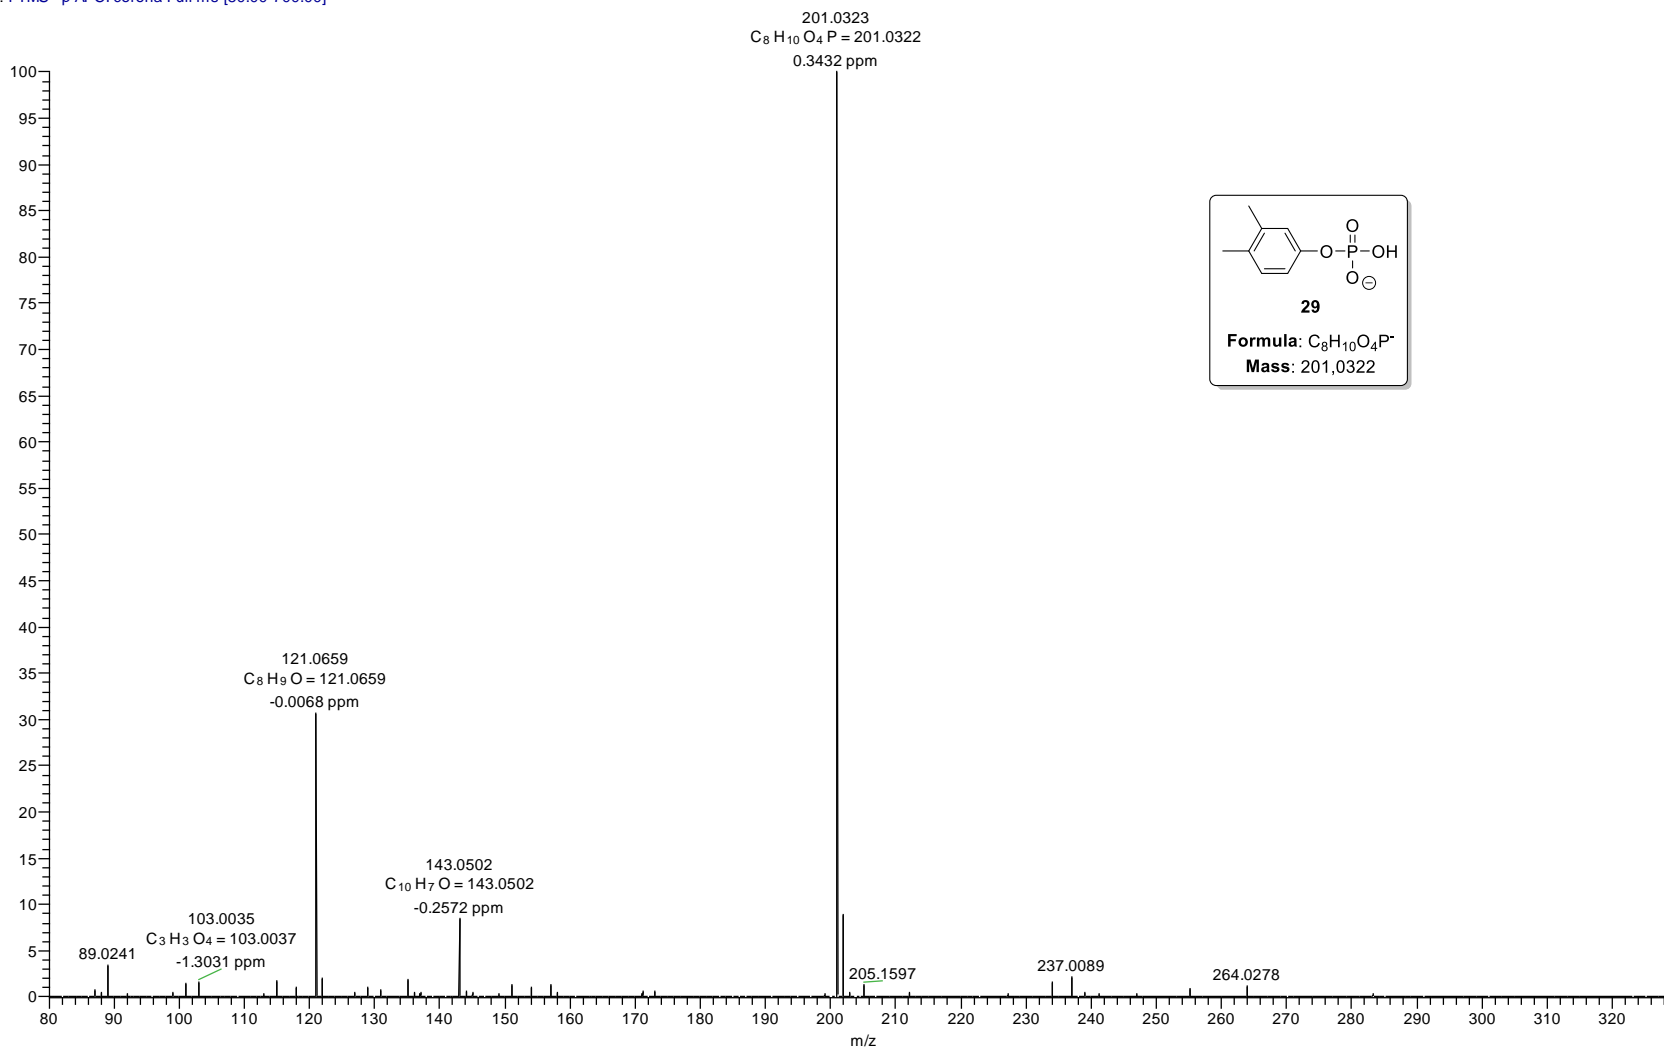

**HRMS (ESI) Analysis of compound 30: 1H-indol-5-yl phosphate**

wejea58shr2 #1 RT: 0.02 AV: 1 NL: 2.15E8  
T: FTMS - p ESI Full lock ms [100.00-1000.00]

212.0118  
C<sub>8</sub>H<sub>7</sub>O<sub>4</sub>NP = 212.0118  
0.0380 ppm

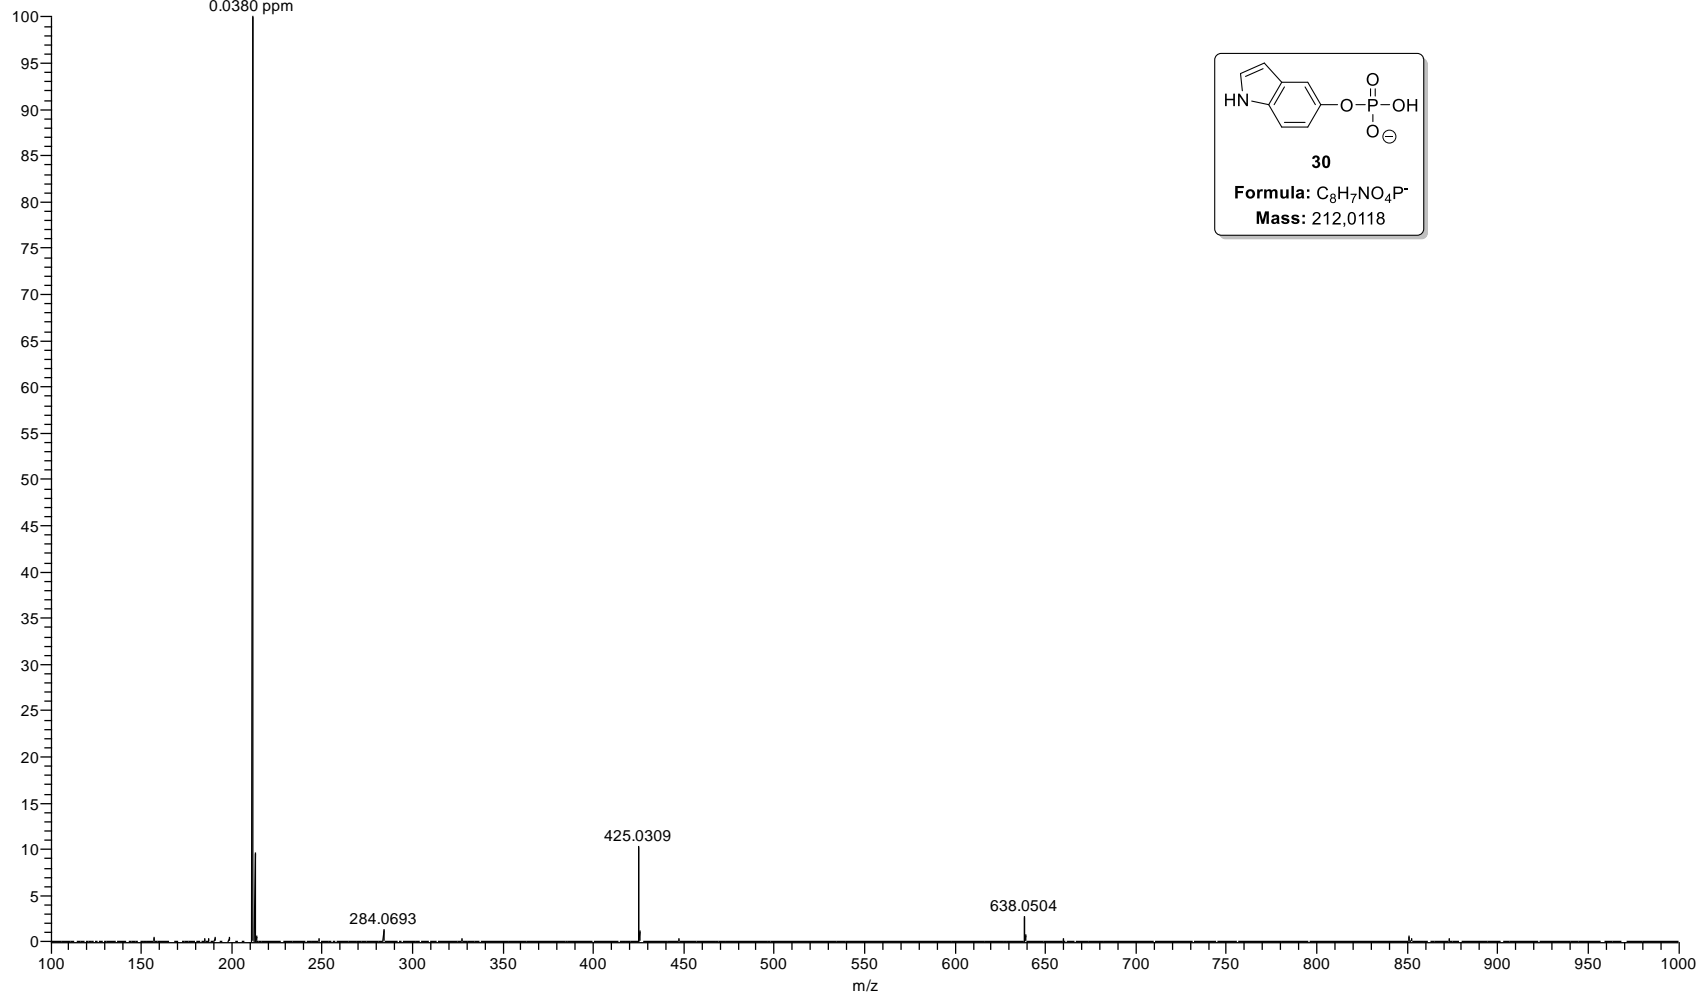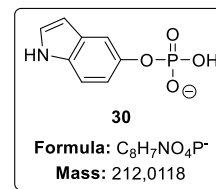



**HRMS (ESI) Analysis of compound 31: pyren-2-yl phosphate**

wejea55shr2 #1 RT: 0.02 AV: 1 NL: 3.40E8  
T: FTMS - p ESI Full lock ms [100.00-700.00]

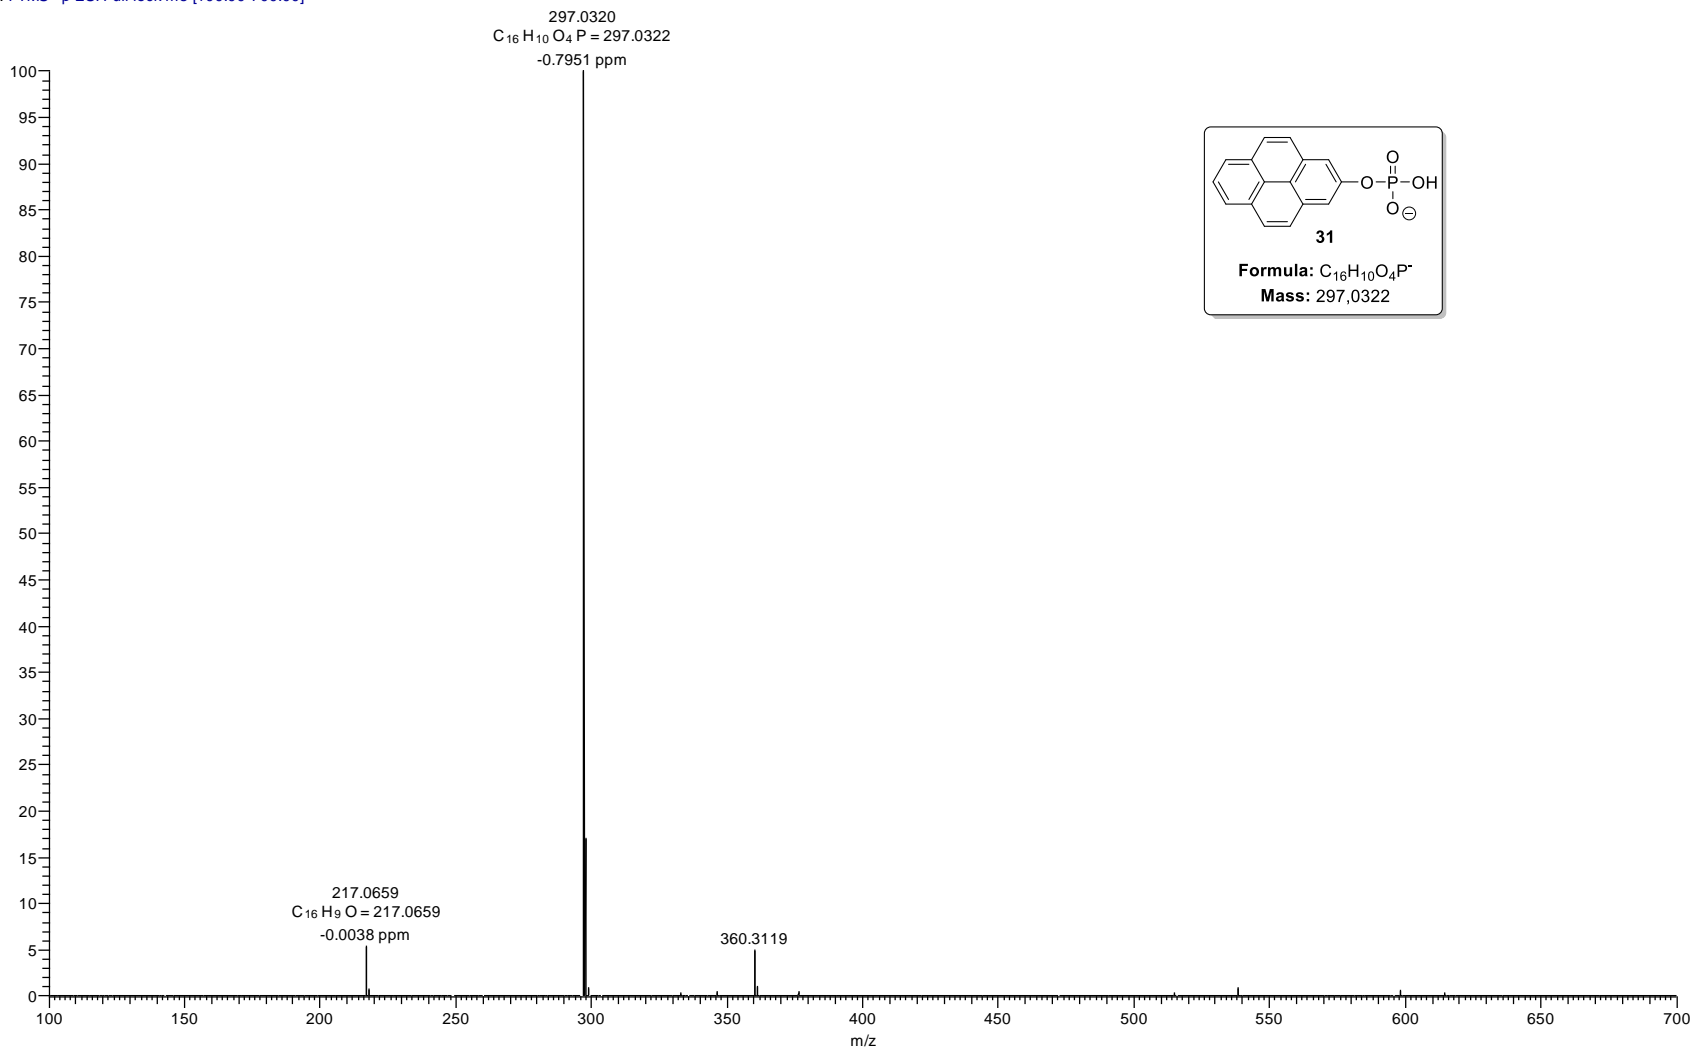

**HRMS (ESI) Analysis of compound 32: phenyl diphosphate**

wejea57shr2 #1 RT: 0.02 AV: 1 NL: 7.89E7  
T: FTMS - p ESI Full lock ms [100.00-700.00]

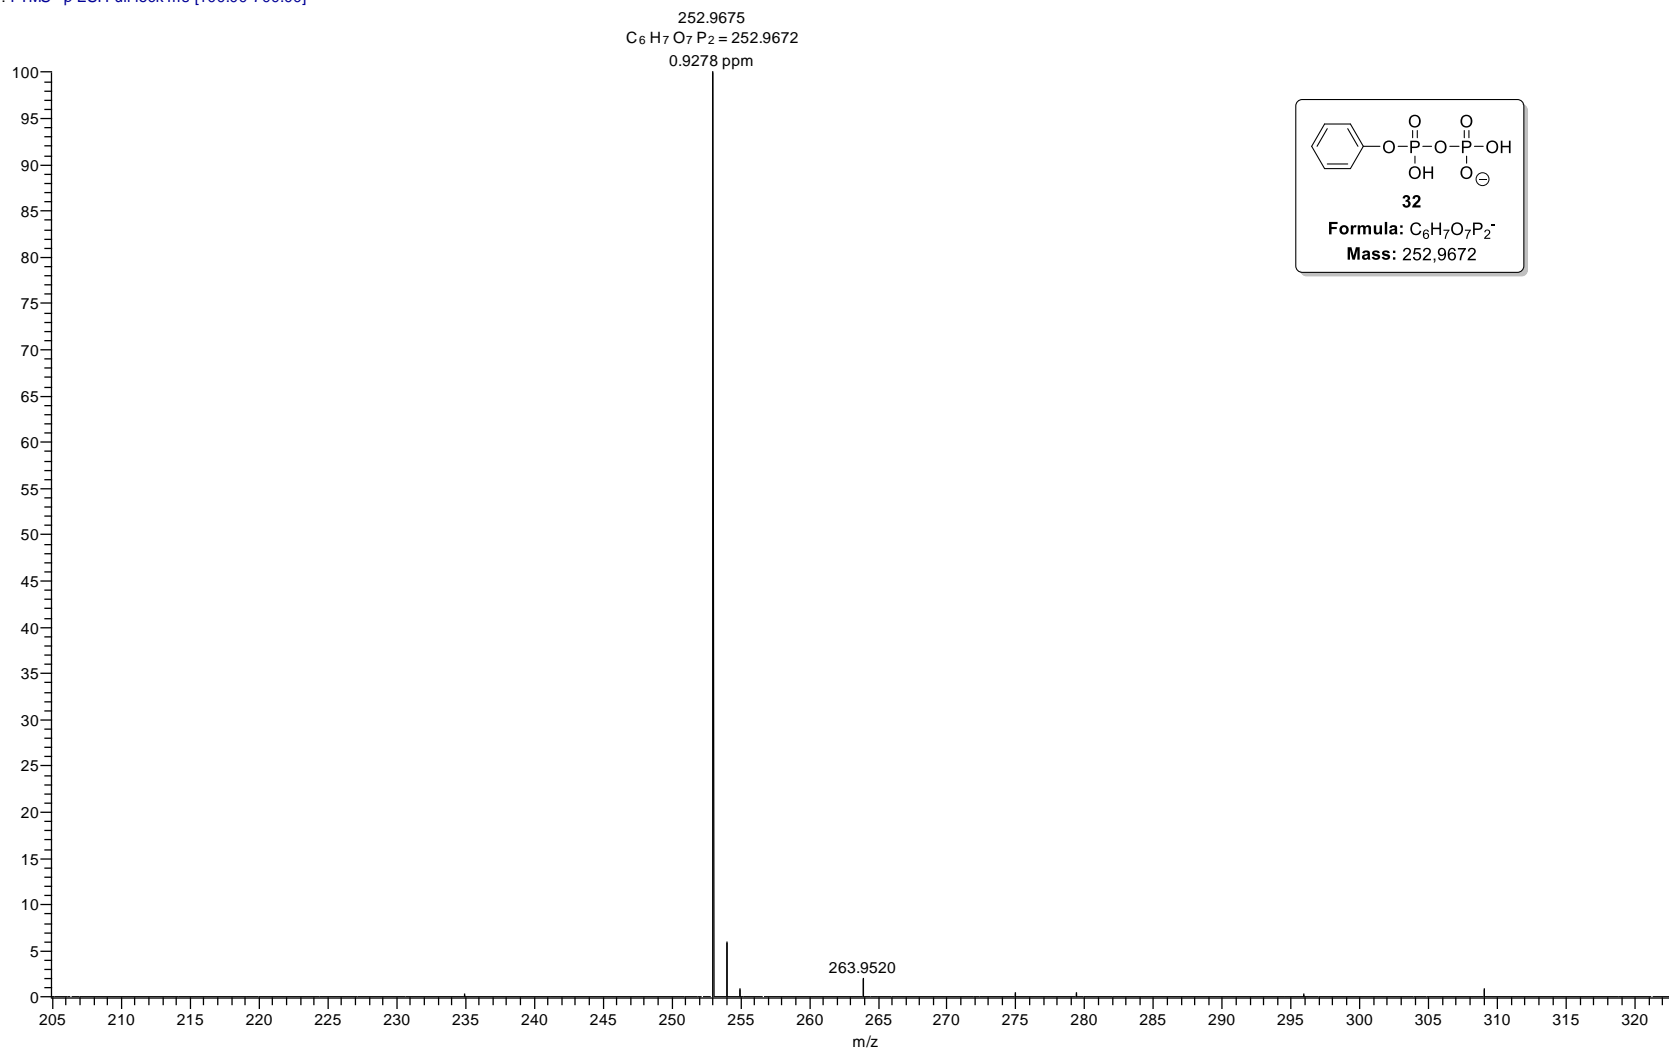

**HRMS (ESI) Analysis of compound 33: 2-naphthalen-2-yl diphosphate**

wejea65shr4 #1 RT: 0.02 AV: 1 NL: 1.23E8  
T: FTMS - p ESI Full ms [80.00-1000.00]

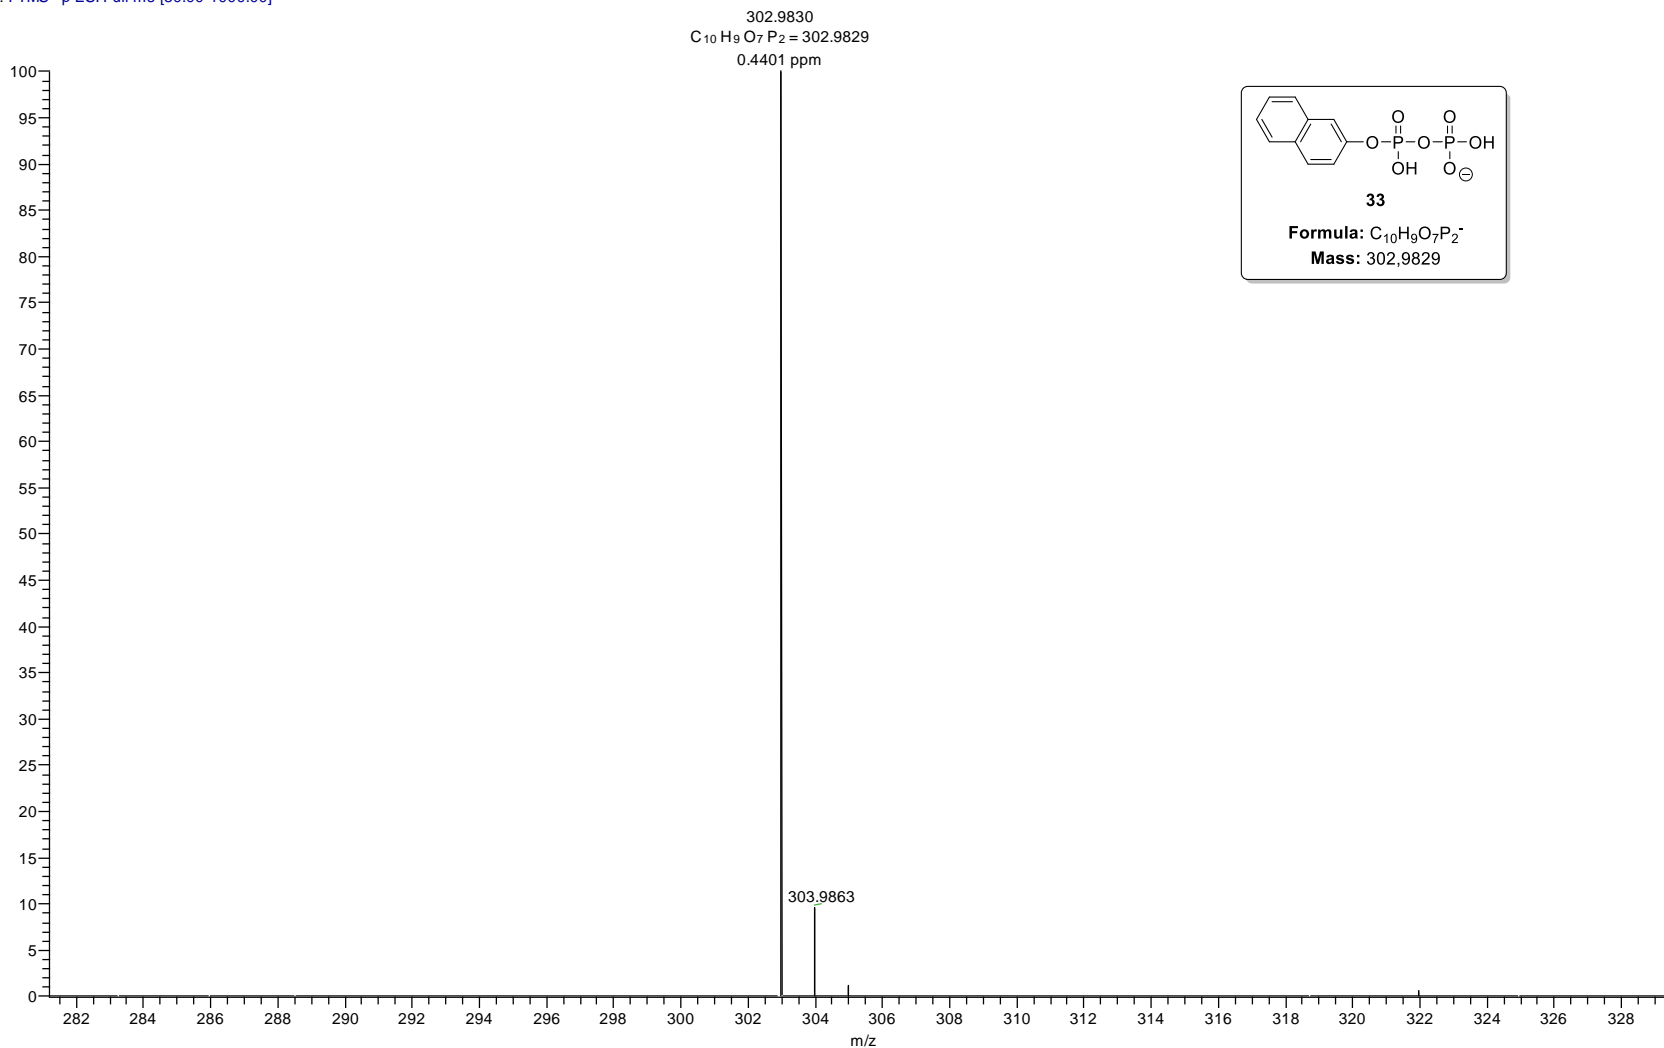

**HRMS (ESI) Analysis of compound 34: 3,4-dimethylphenyl diphosphate**

wejea68shr3 #1 RT: 0.02 AV: 1 NL: 7.96E7  
T: FTMS - p ESI Full ms [50.00-800.00]

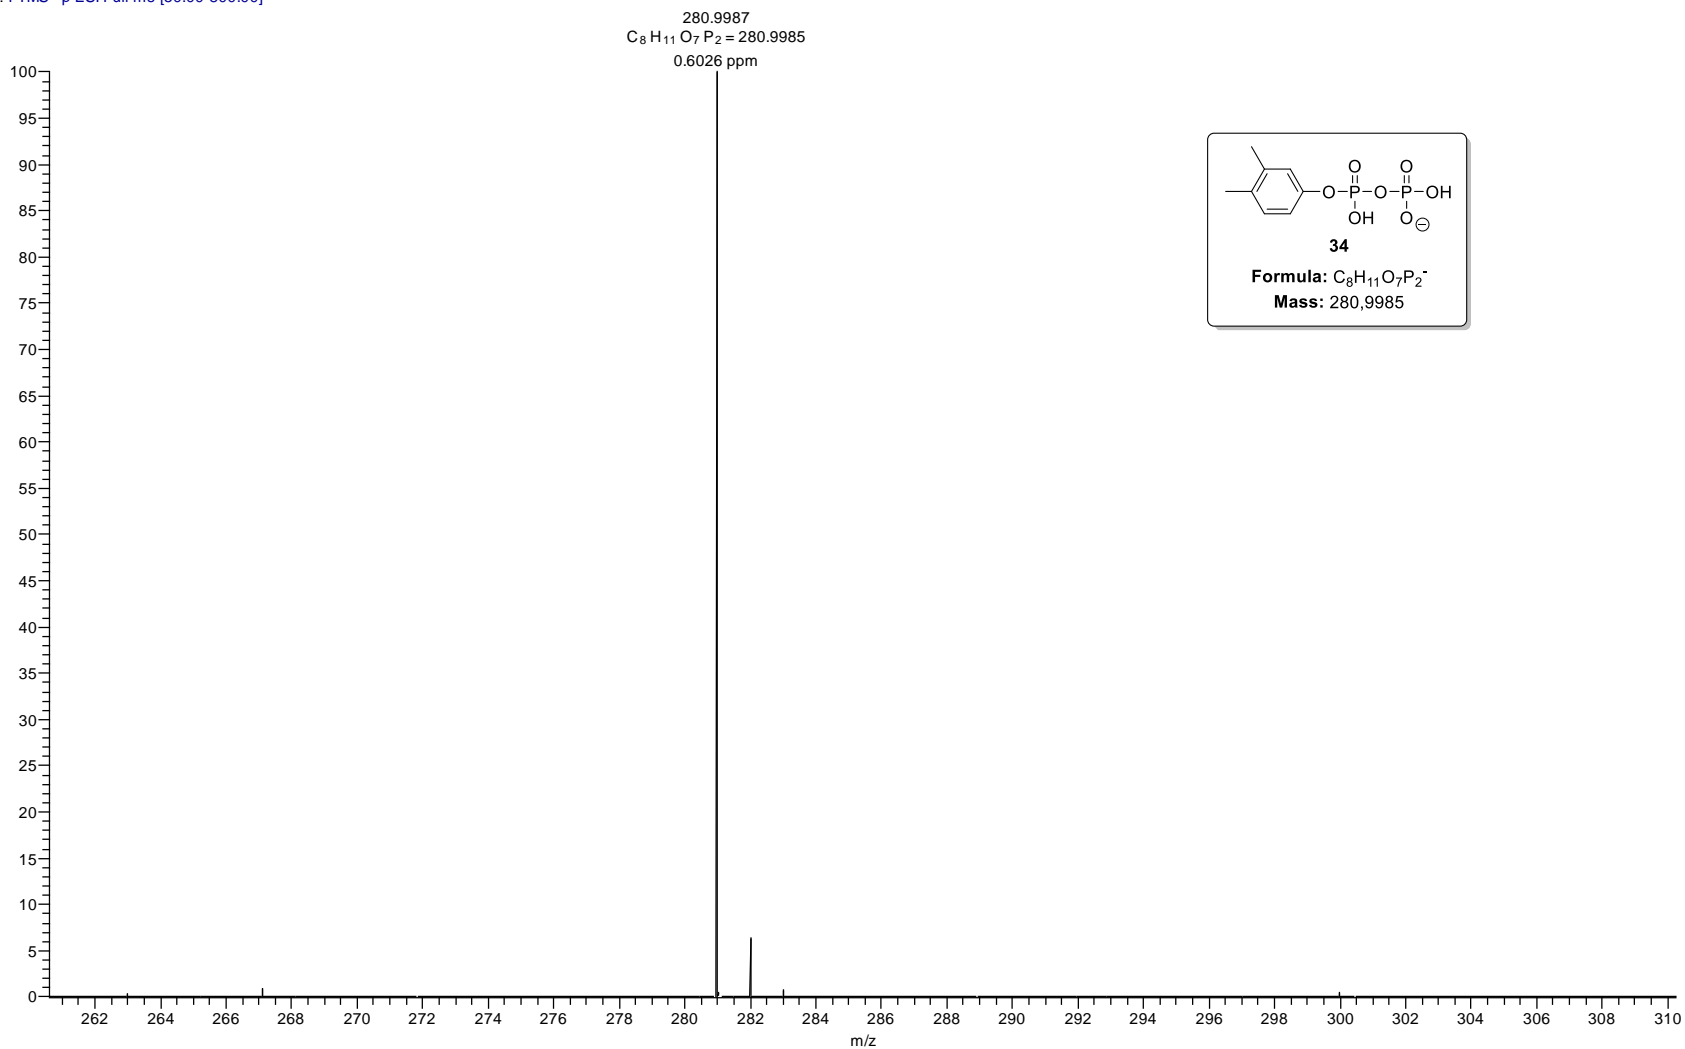

**HRMS (ESI) Analysis of compound 35: 1H-indol-5-yl diphosphate**

wejea67shr2 #1 RT: 0.02 AV: 1 NL: 5.76E7  
T: FTMS - p ESI Full lock ms [80.00-1000.00]

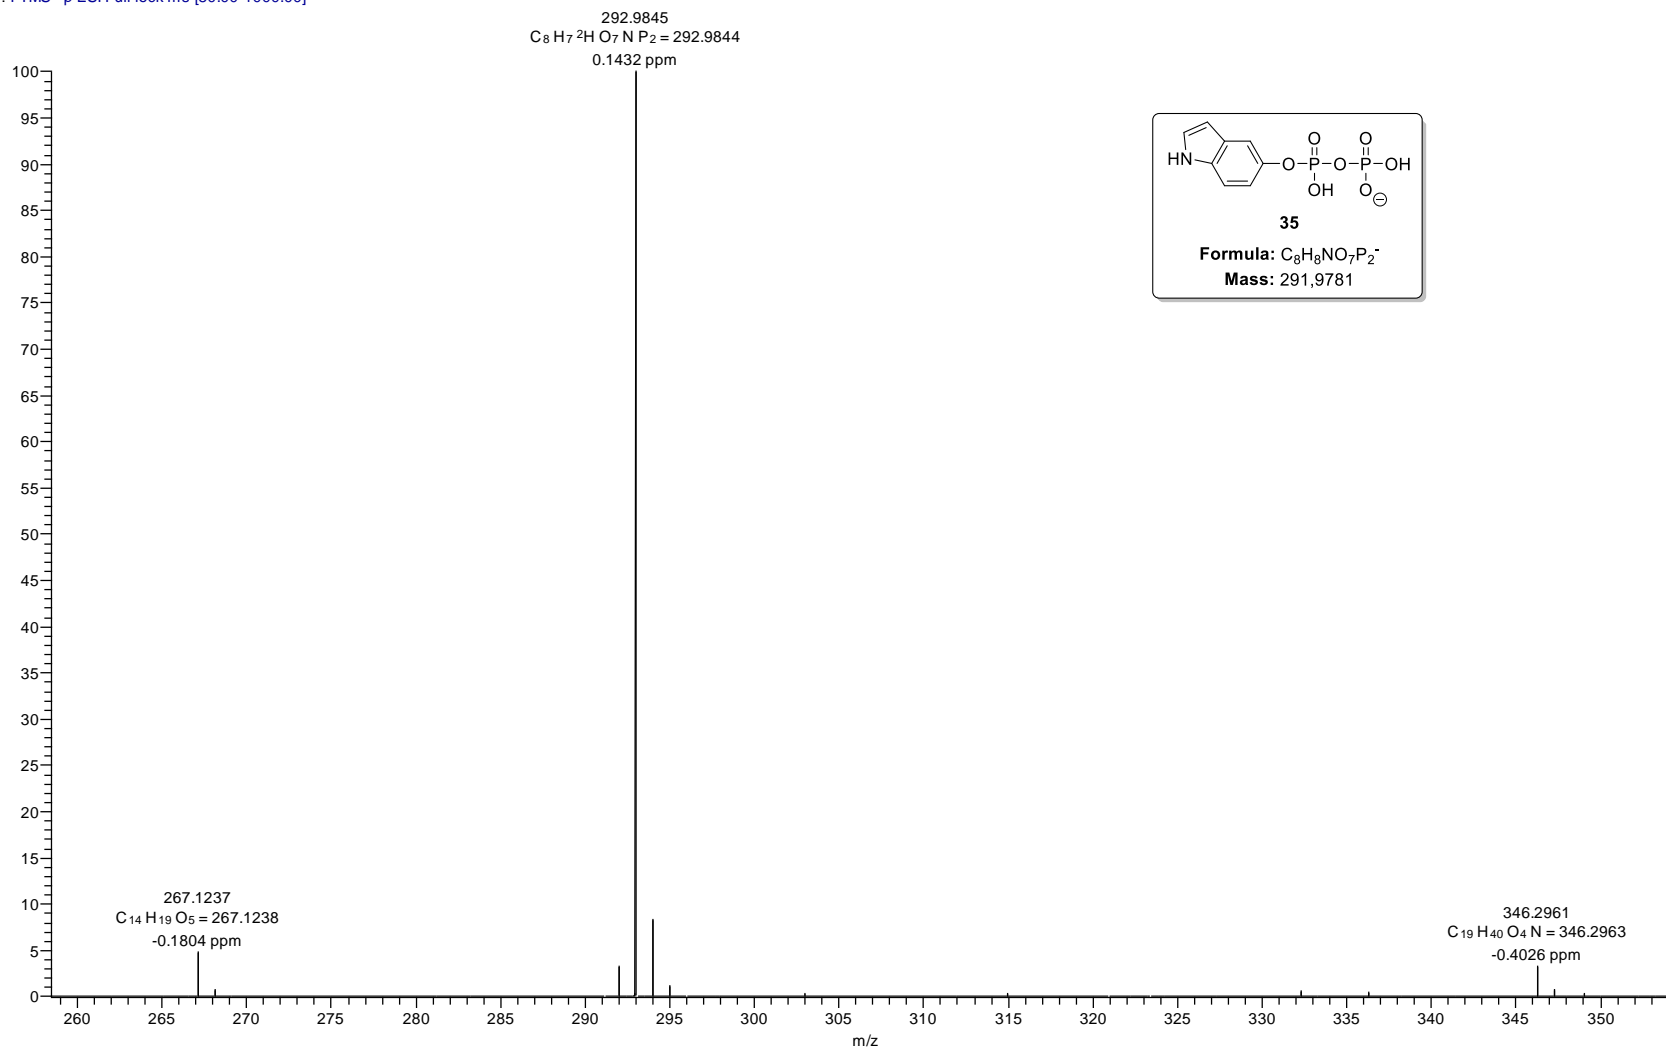

**HRMS (ESI) Analysis of compound 36: pyren-2-yl diphosphate**

wejea69shr2 #1 RT: 0.02 AV: 1 NL: 1.99E7  
T: FTMS - p ESI Full lock ms [50.00-800.00]

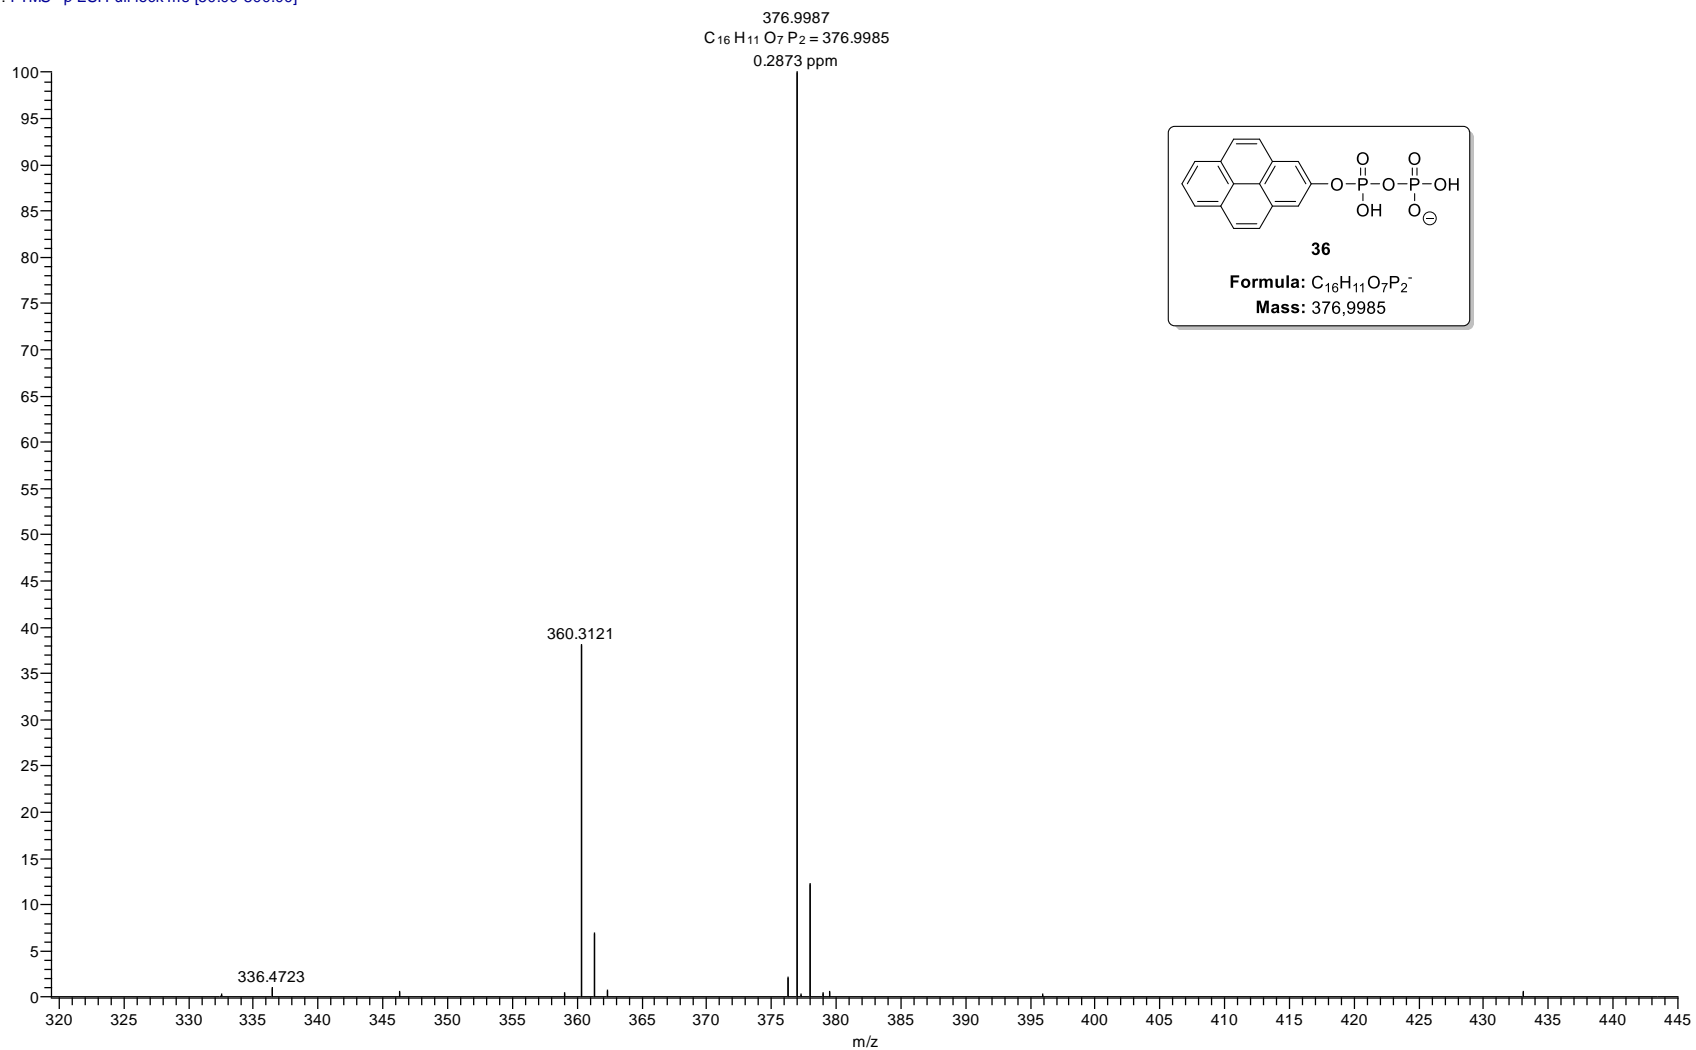

**HRMS (ESI) Analysis of compound 37: deuterio-phenylphosphate**

hsjec49shr1 #1 RT: 0.02 AV: 1 NL: 1.73E7  
T: FTMS - p ESI Full ms [50.00-500.00]

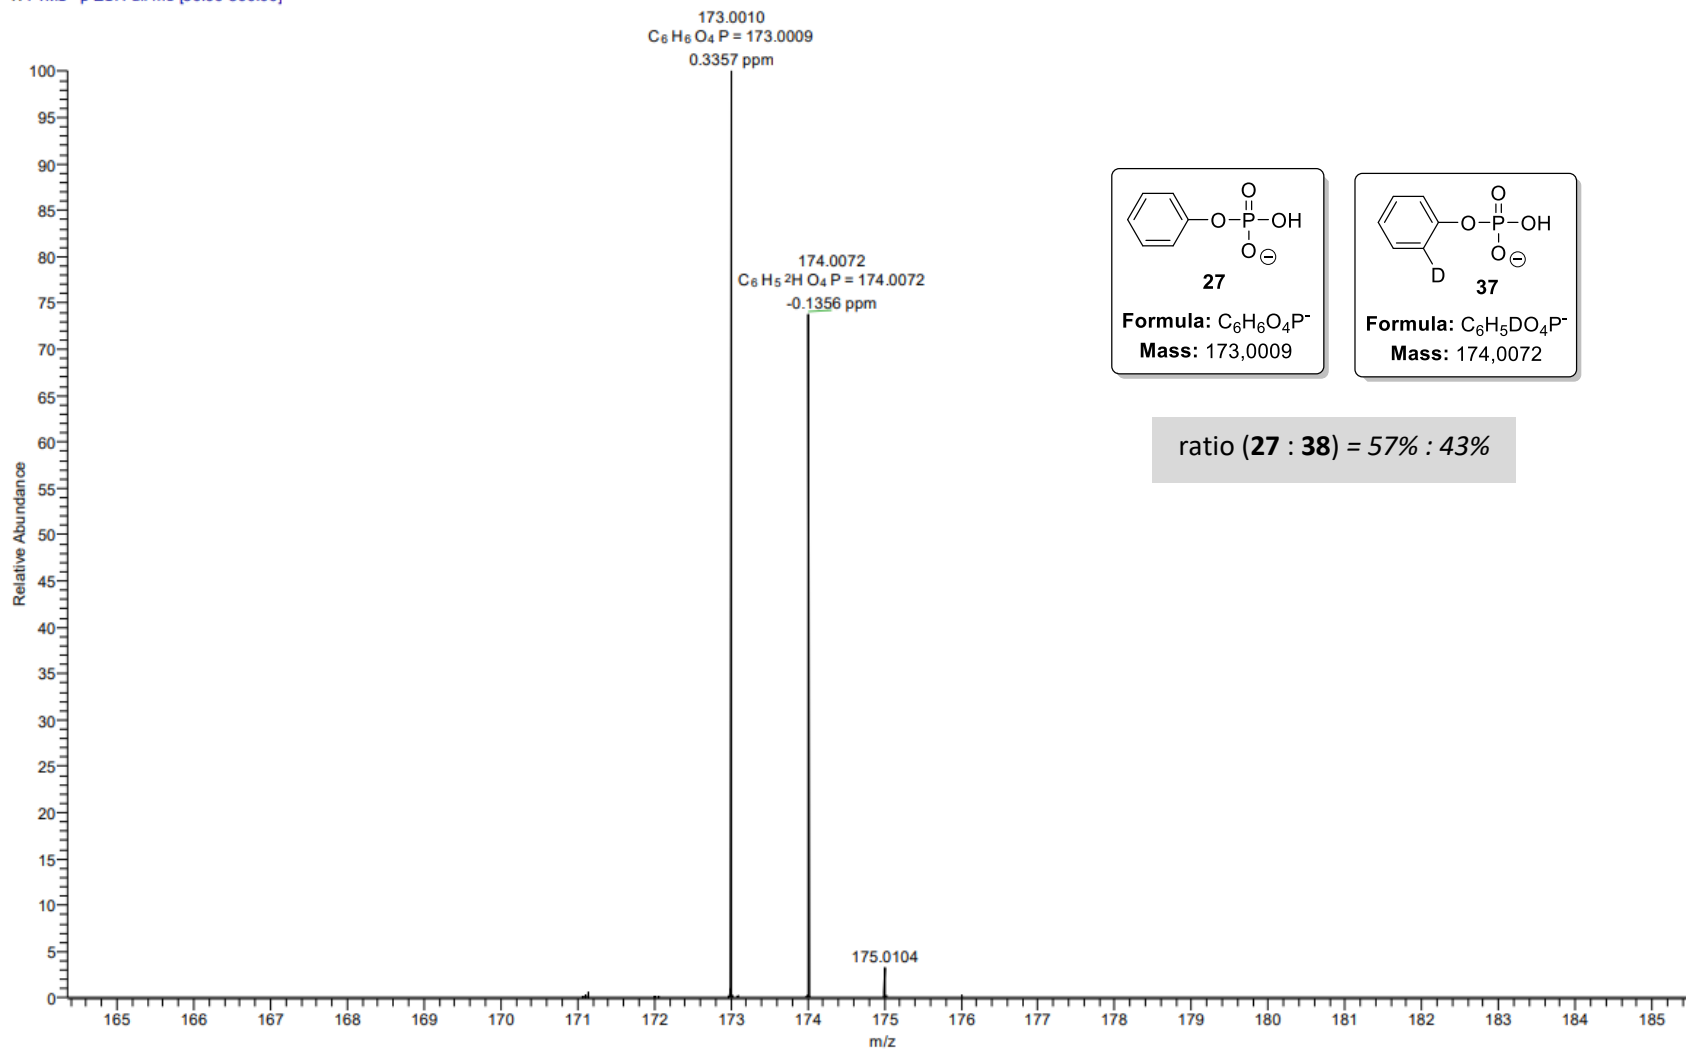

**HRMS (ESI) Analysis of compound 38: 5,5,5-trifluoropentyl phosphate**

wejea13shr3 #1 RT: 0.02 AV: 1 NL: 8.15E7  
T: FTMS - p ESI Full ms [50.00-700.00]

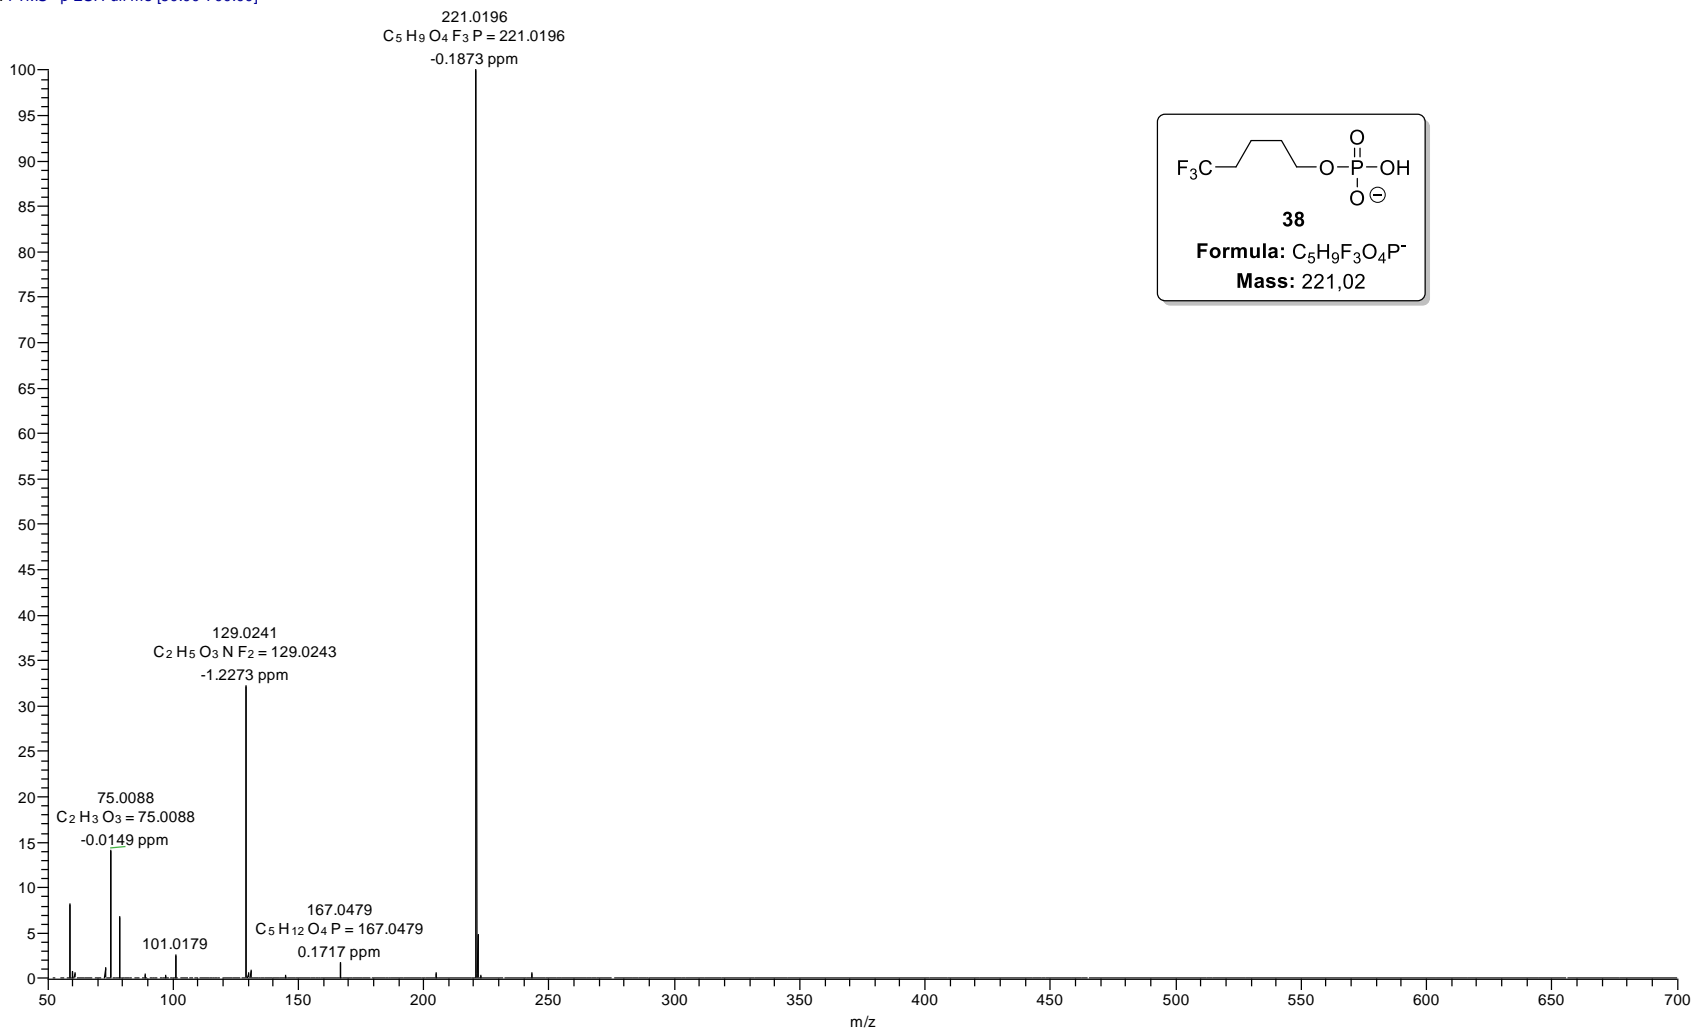



**HRMS (ESI) Analysis of compound 40: phenyl (5,5,5-trifluoropentyl) phosphate**

hsjec25shr1 #1 RT: 0.02 AV: 1 NL: 6.44E7  
T: FTMS - p ESI Full lock ms [100.00-1000.00]

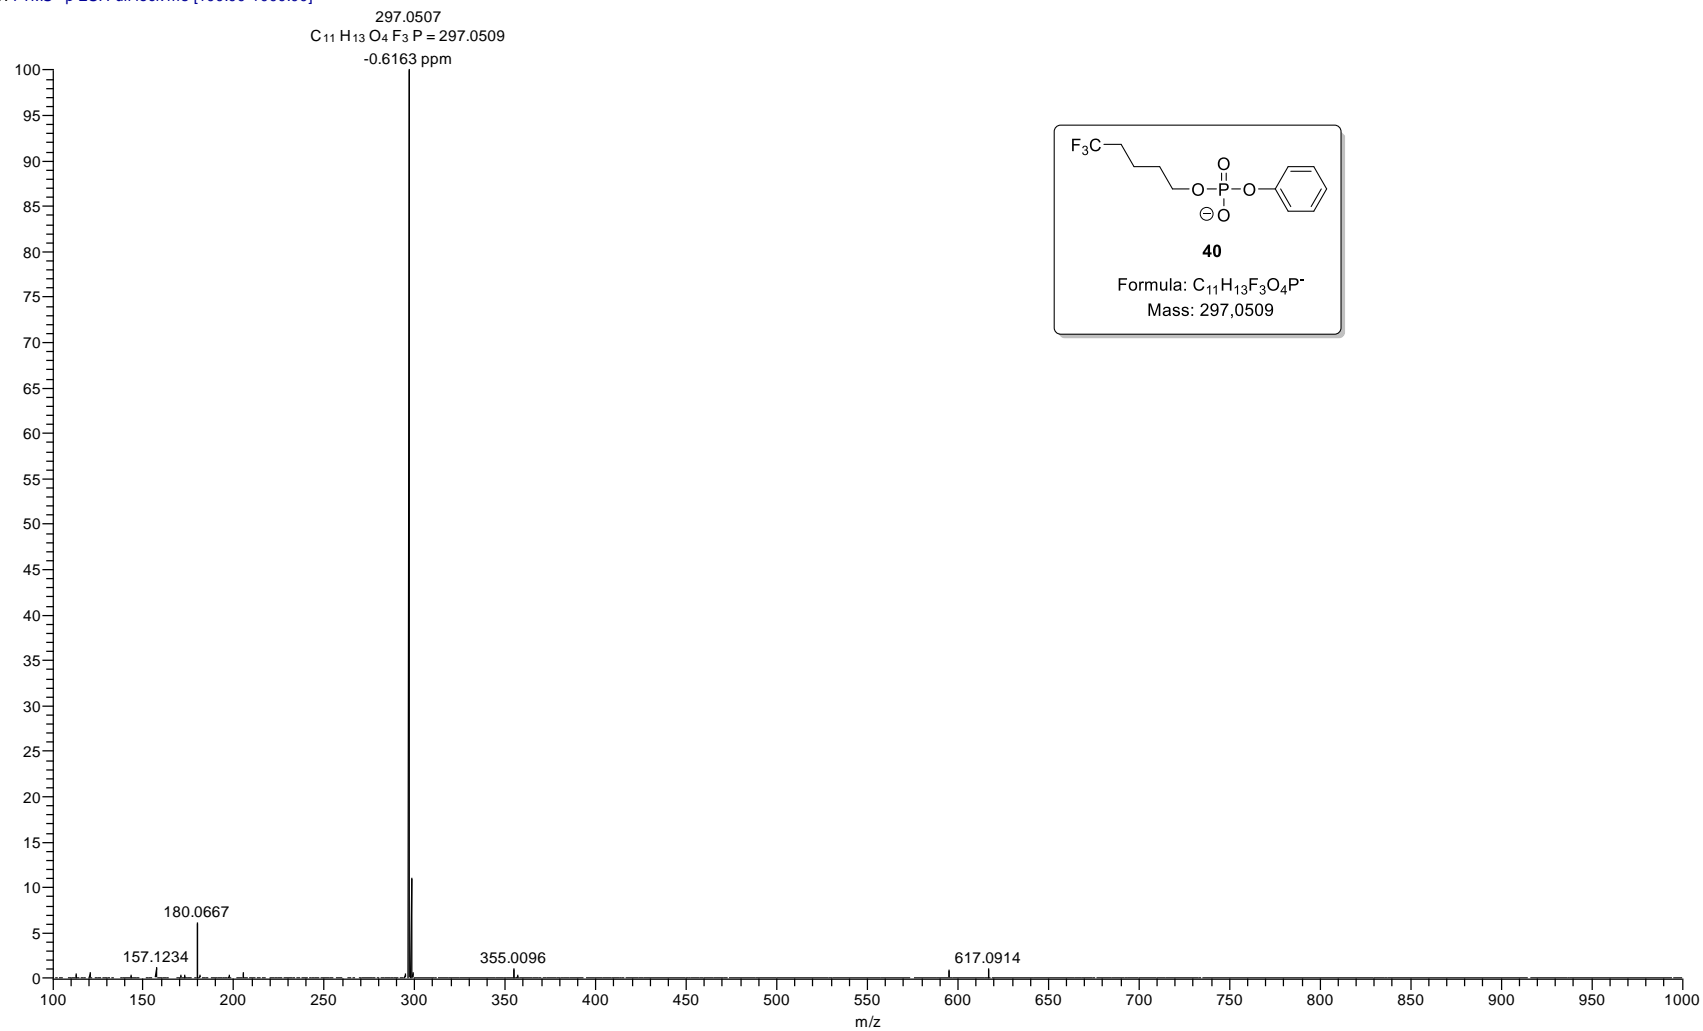

**HRMS (ESI) Analysis of compound 41: 3,4-dimethylphenyl (5,5,5-trifluoropentyl) phosphate**

wejea26shr2 #1 RT: 0.02 AV: 1 NL: 3.00E6  
T: FTMS - p ESI Full ms [100.00-800.00]

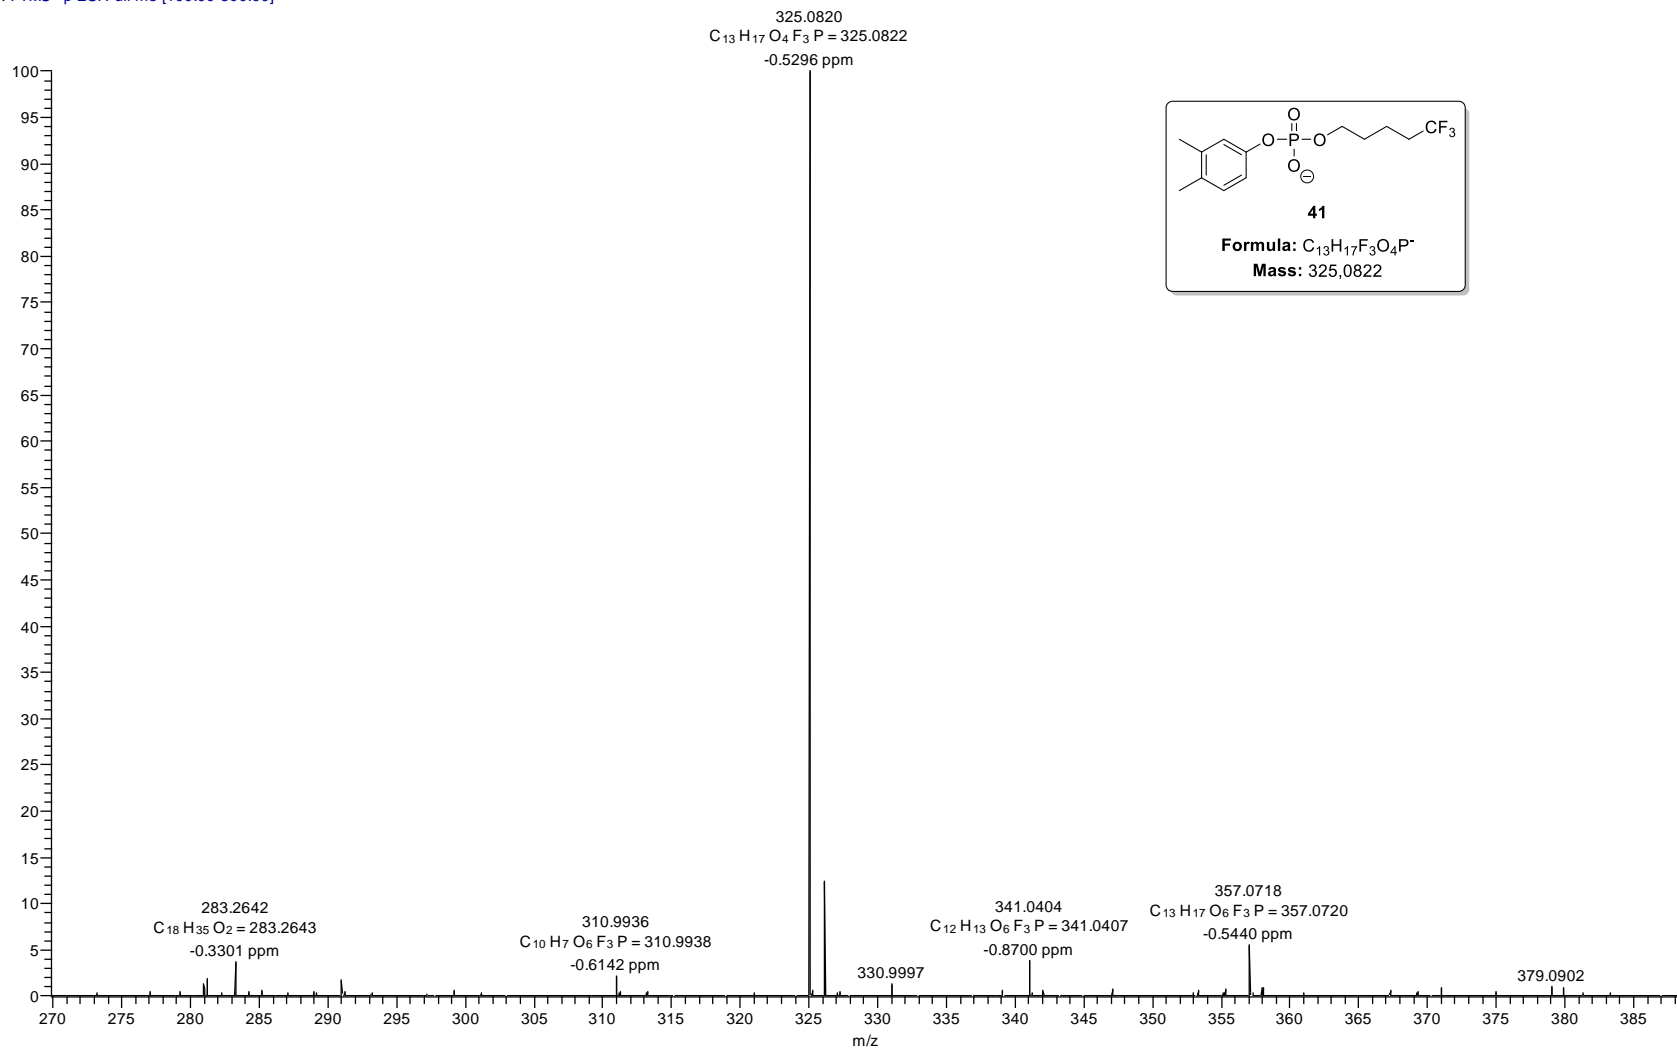

**HRMS (ESI) Analysis of compound 42: 2,5-dimethylphenyl (5,5,5-trifluoropentyl) phosphate**

wejea24shr1 #1 RT: 0.02 AV: 1 NL: 3.65E7  
T: FTMS - p ESI Full lock ms [100.00-700.00]

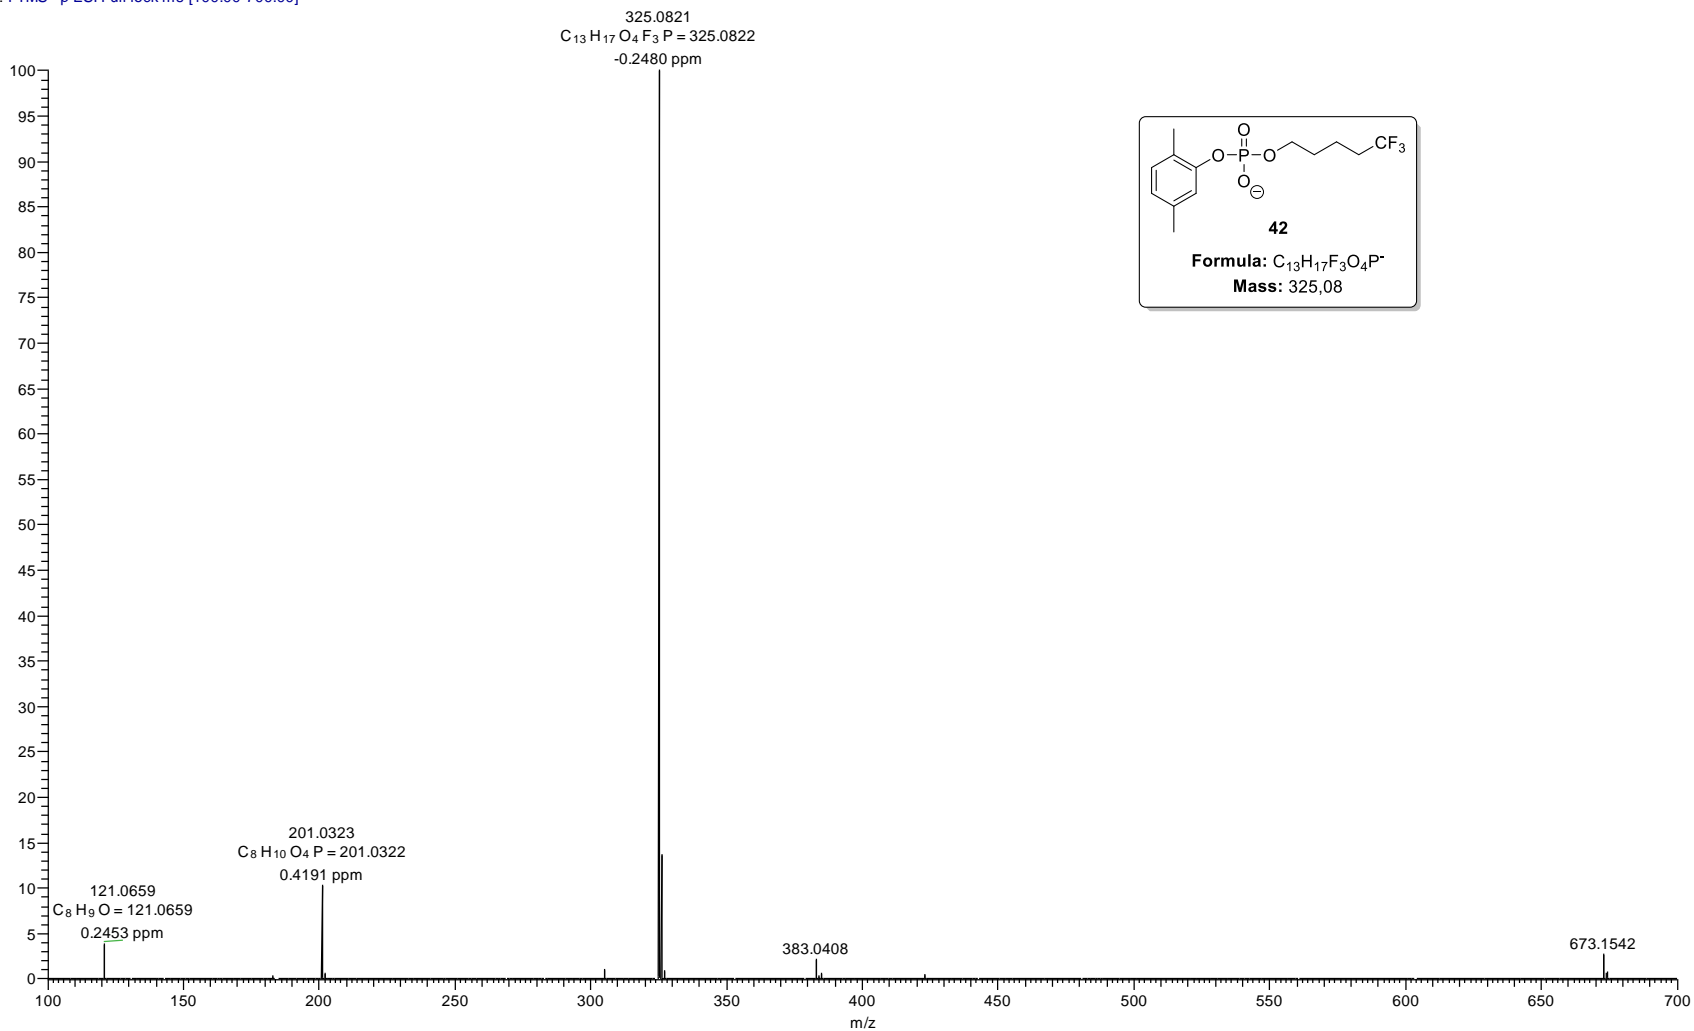

**HRMS (ESI) Analysis of compound 43: 3,4-dimethoxyphenyl (5,5,5-trifluoropentyl) phosphate**

wejea27shr2 #1 RT: 0.02 AV: 1 NL: 2.64E6  
T: FTMS - p ESI Full ms [100.00-800.00]

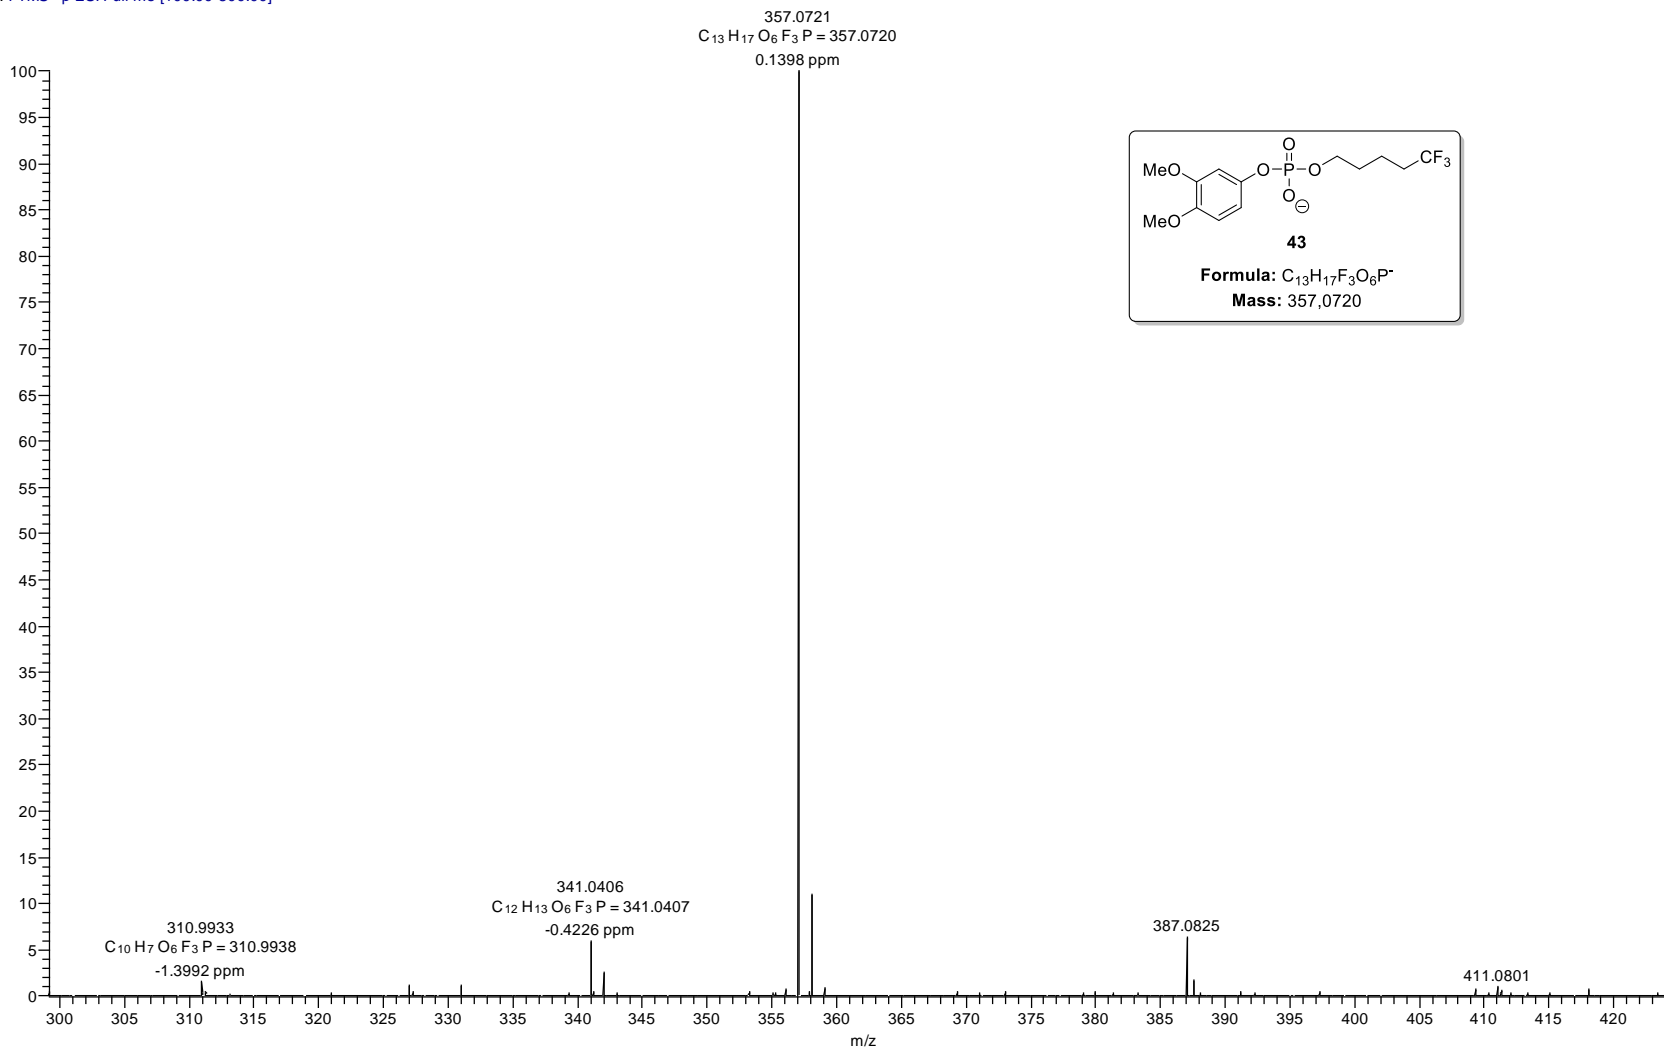

**HRMS (ESI) Analysis of compound 44: 4-(trifluoromethyl)phenyl (5,5,5-trifluoropentyl) phosphate**

wejea32shr2 #1 RT: 0.02 AV: 1 NL: 5.03E8  
T: FTMS - p ESI Full ms [100.00-1000.00]

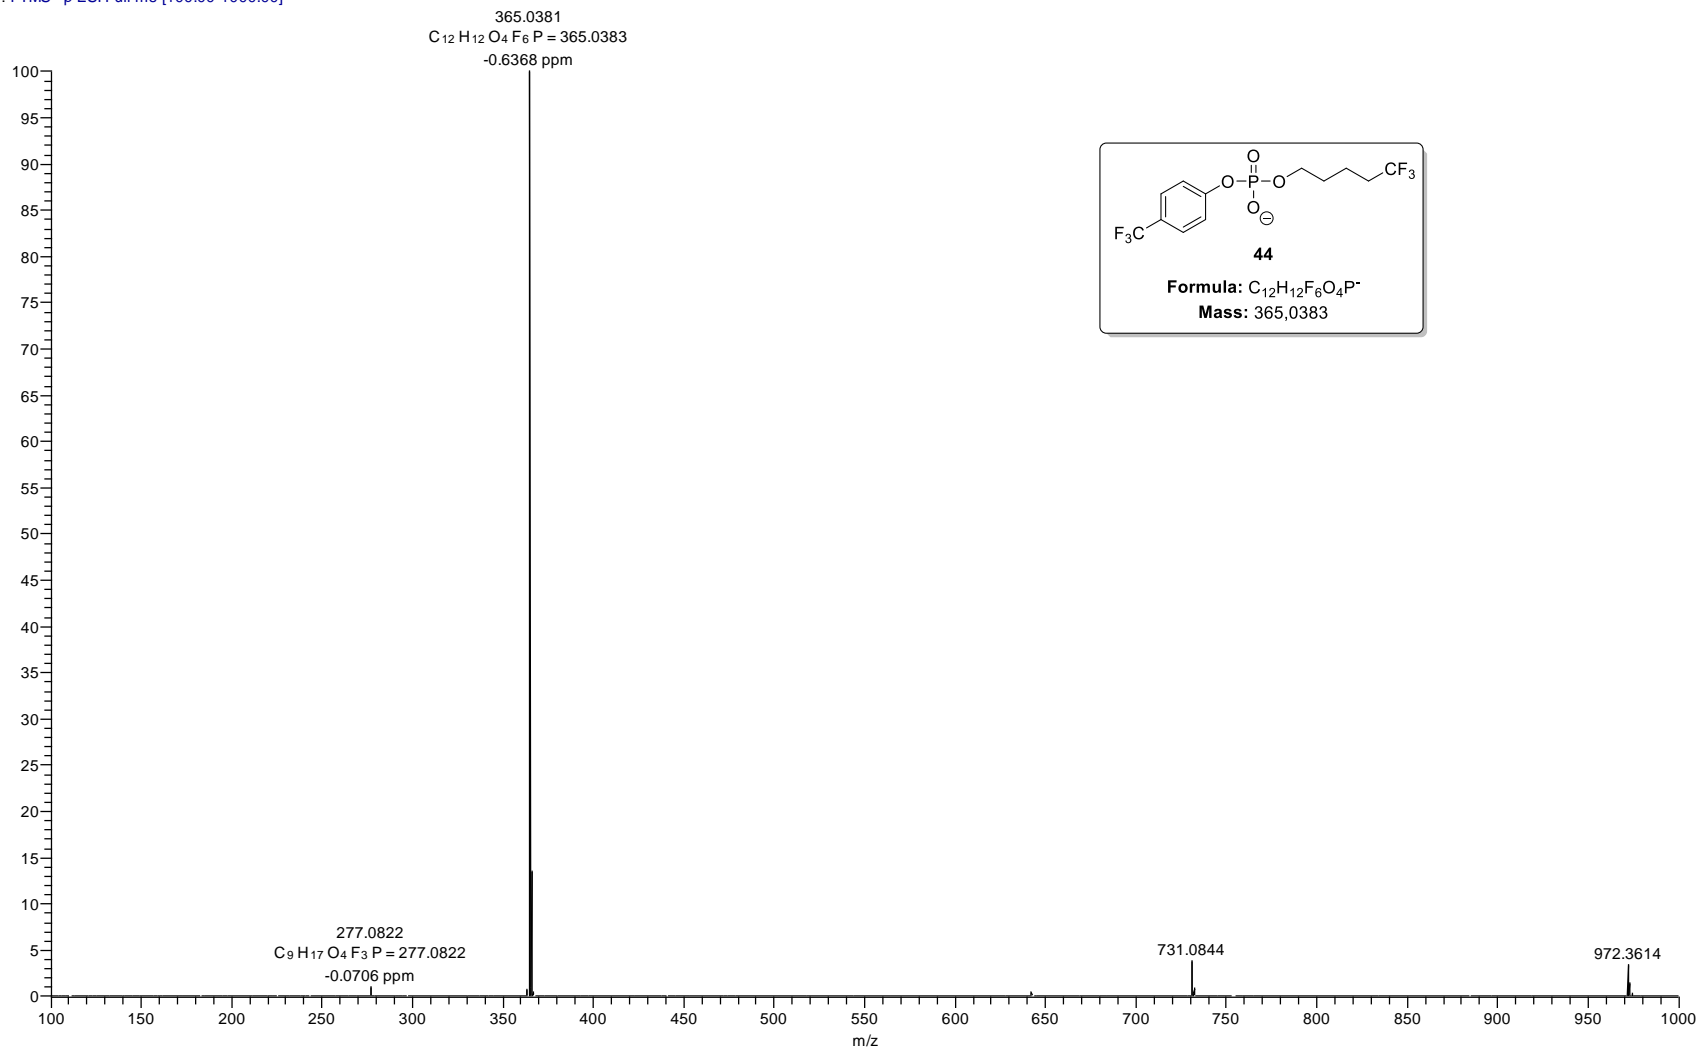

**HRMS (ESI) Analysis of compound 45: benzo[d][1,3]dioxol-5-yl (5,5,5-trifluoropentyl) phosphate**

wejea28shr2 #1 RT: 0.02 AV: 1 NL: 5.78E8  
T: FTMS - p ESI Full ms [100.00-800.00]

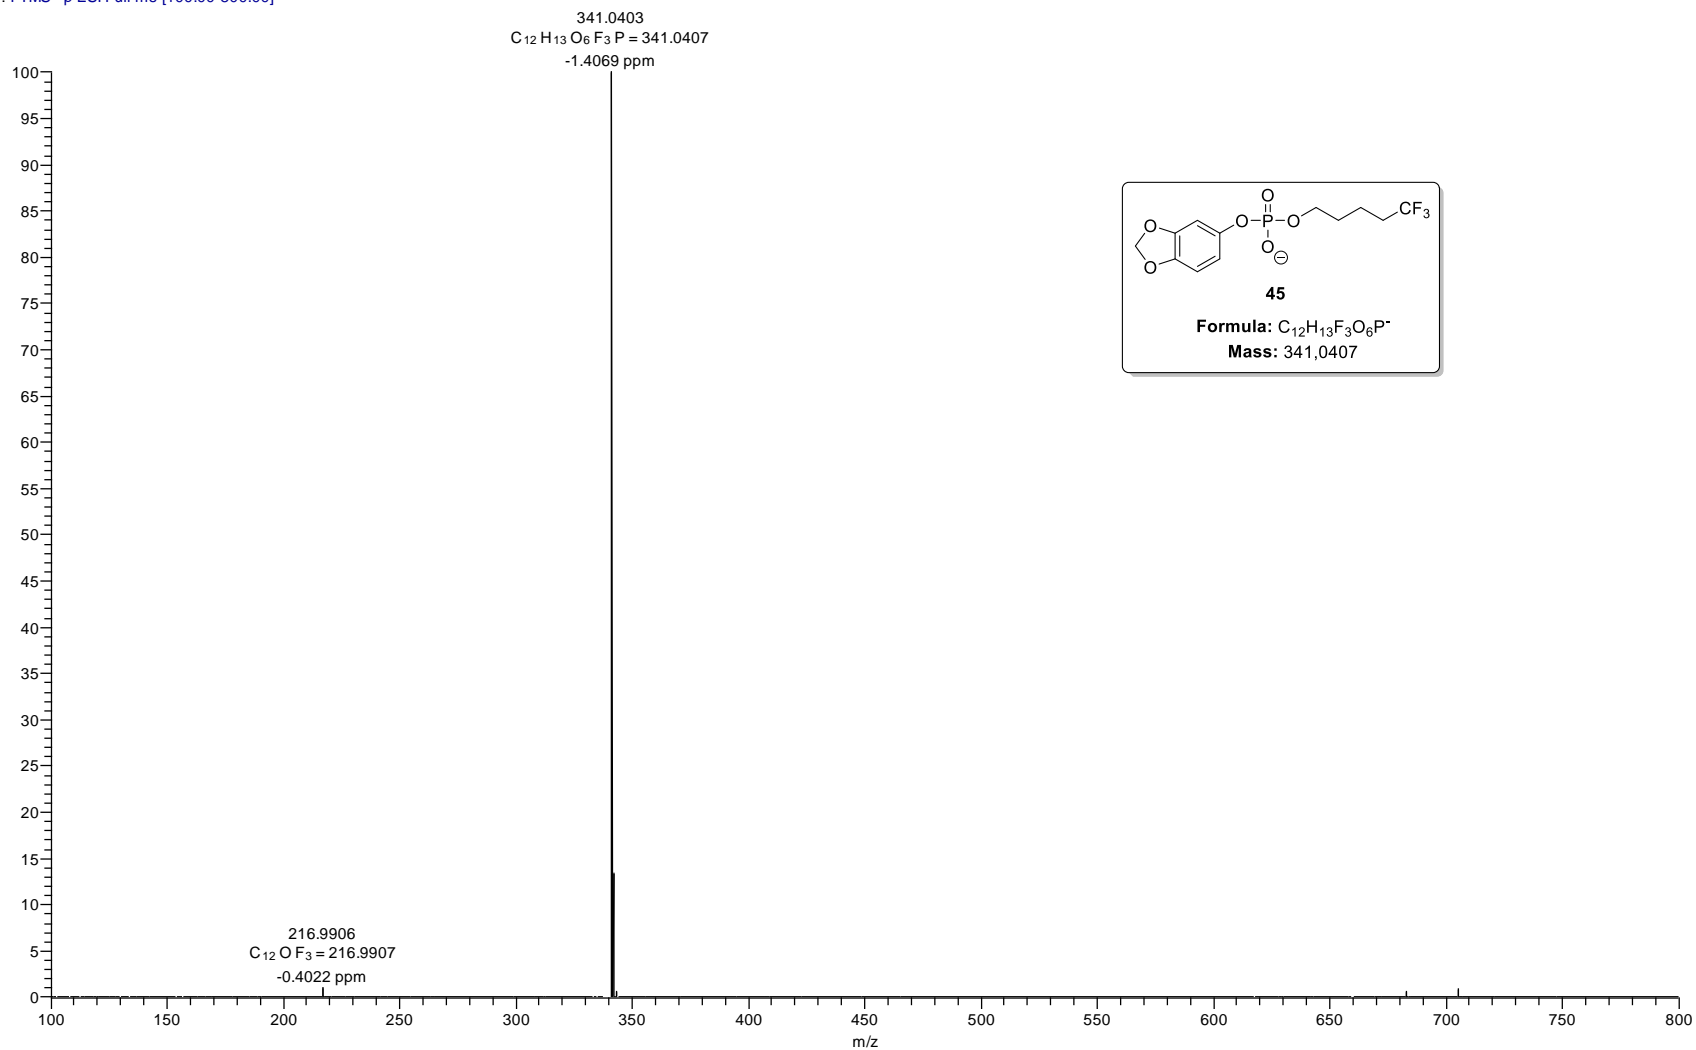

**HRMS (ESI) Analysis of compound 46: 4-ethynylphenyl (5,5,5-trifluoropentyl) phosphate**

wejea54shr2 #1 RT: 0.02 AV: 1 NL: 3.53E8  
T: FTMS - p ESI Full lock ms [100.00-1000.00]

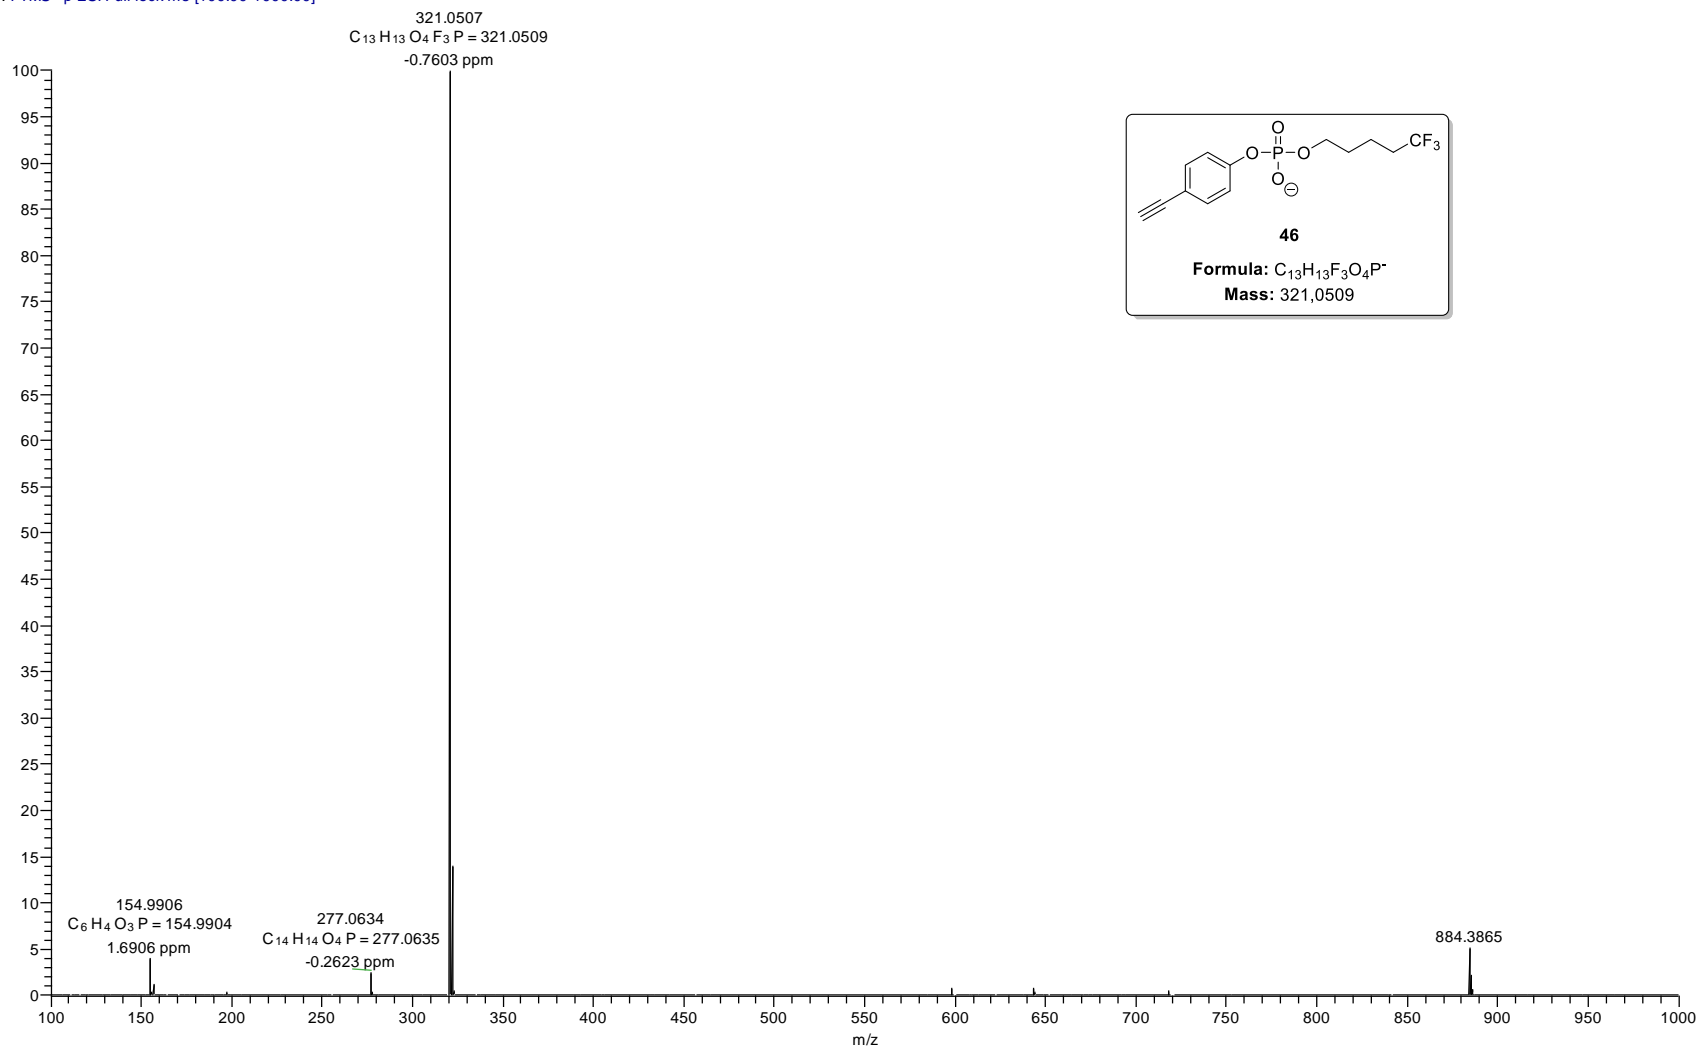

**HRMS (ESI) Analysis of compound 47: 3-bromophenyl (5,5,5-trifluoropentyl) phosphate**

wejea50shr2 #1 RT: 0.02 AV: 1 NL: 1.58E8  
T: FTMS - p ESI Full ms [100.00-1000.00]

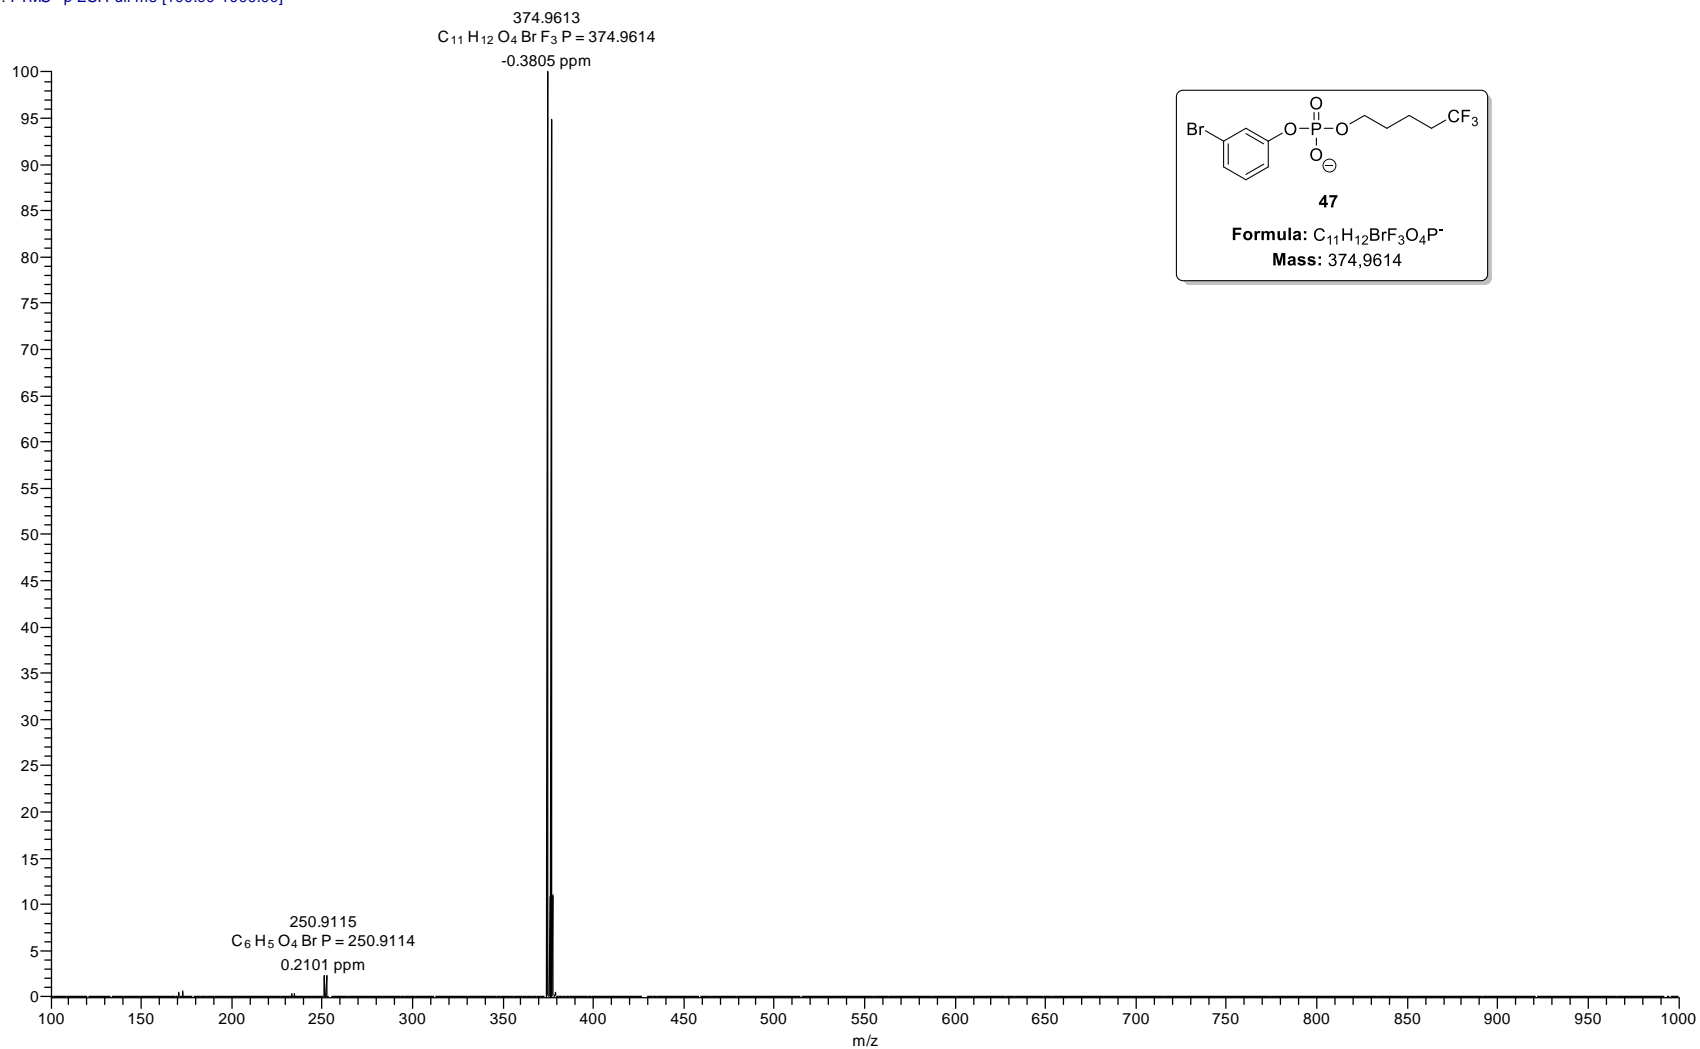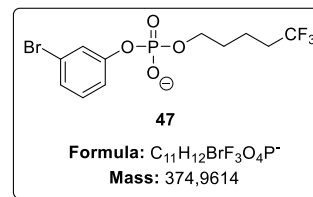



**HRMS (ESI) Analysis of compound 48:4-chlorophenyl (5,5,5-trifluoropentyl) phosphate**

wejea30shr1 #1 RT: 0.02 AV: 1 NL: 6.22E8  
T: FTMS - p ESI Full ms [100.00-1000.00]

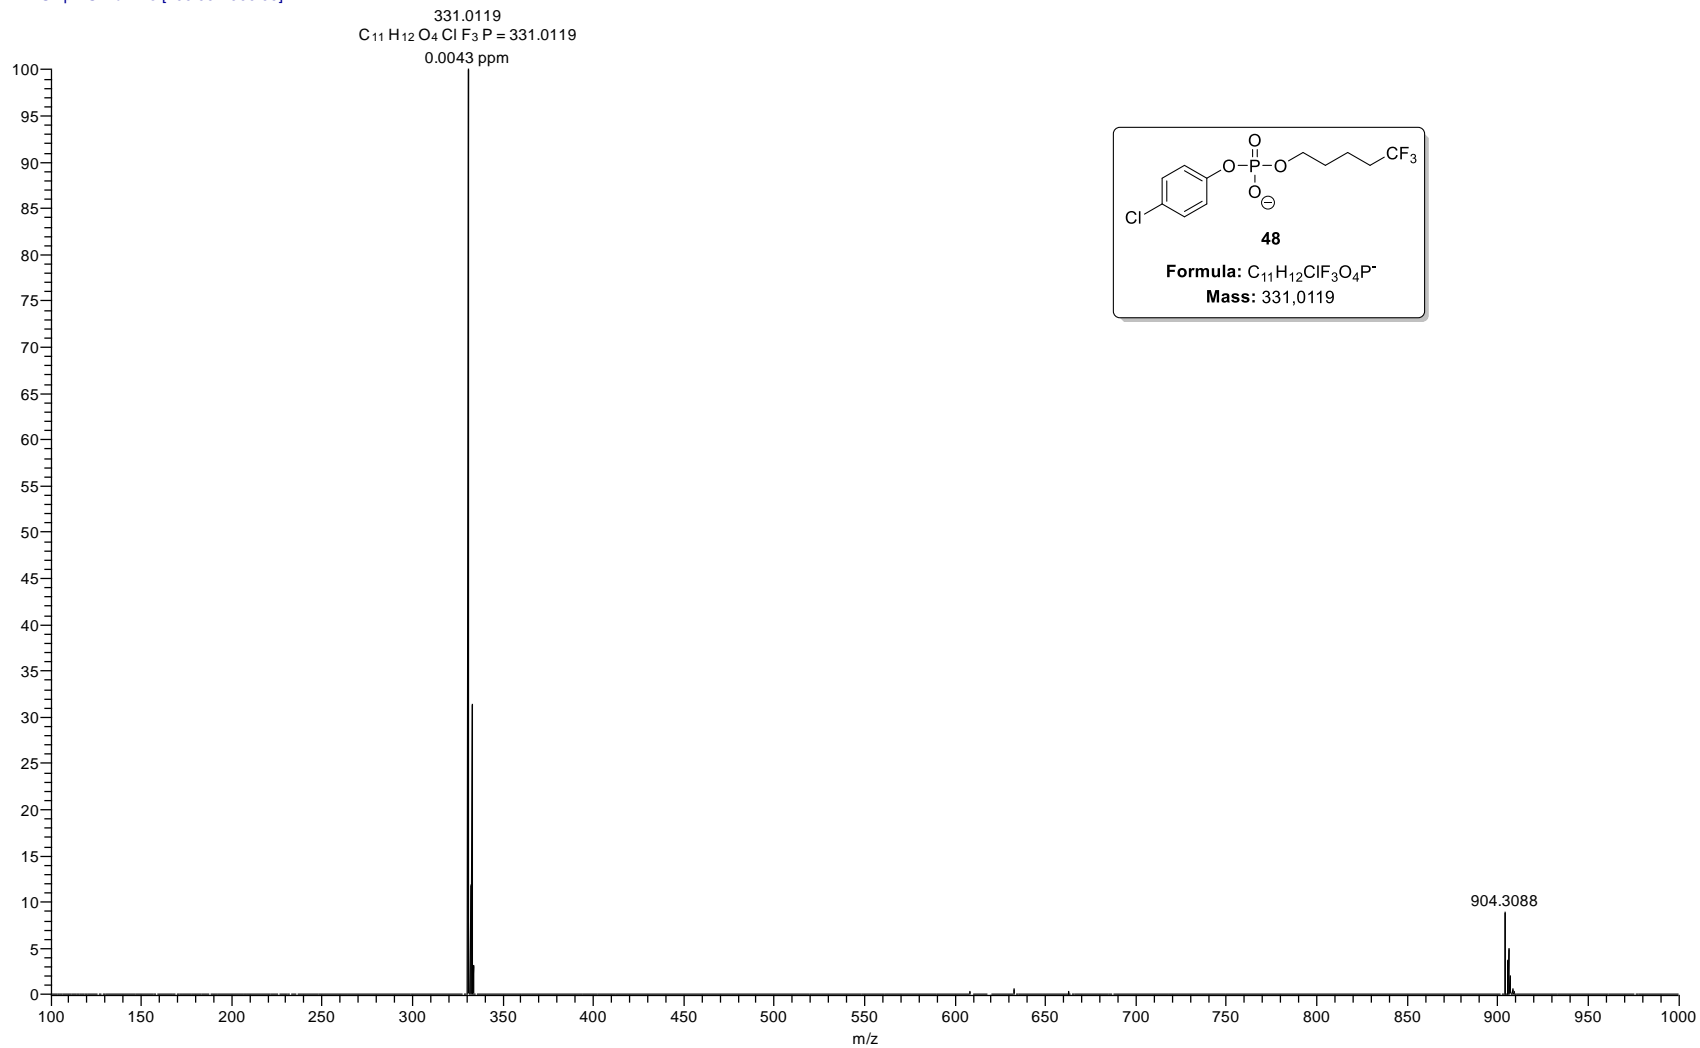

**HRMS (ESI) Analysis of compound 49, naphthalen-2-yl (5,5,5-trifluoropentyl) phosphate**

wejea25shr1 #1 RT: 0.02 AV: 1 NL: 3.27E8  
T: FTMS - p ESI Full ms [100.00-1000.00]

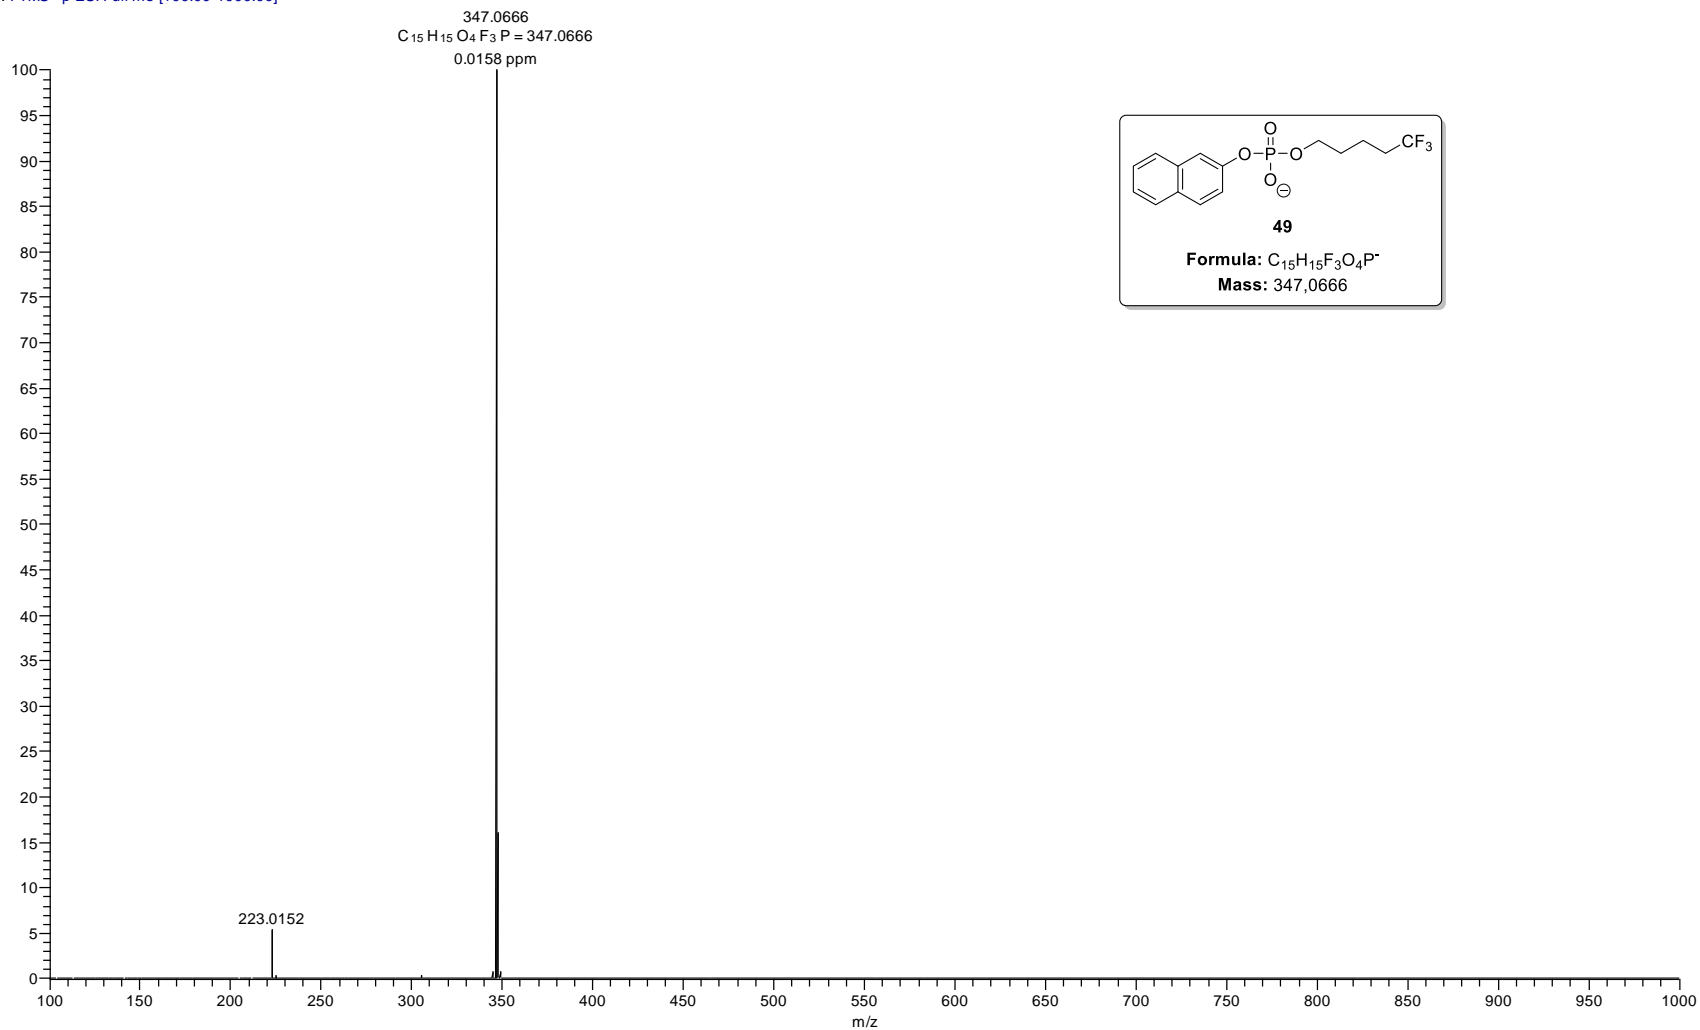

**HRMS (ESI) Analysis of compound 50: 1H-indol-5-yl (5,5,5-trifluoropentyl) phosphate**

wejea51shr2 #1 RT: 0.02 AV: 1 NL: 2.63E8  
T: FTMS - p ESI Full lock ms [100.00-1000.00]

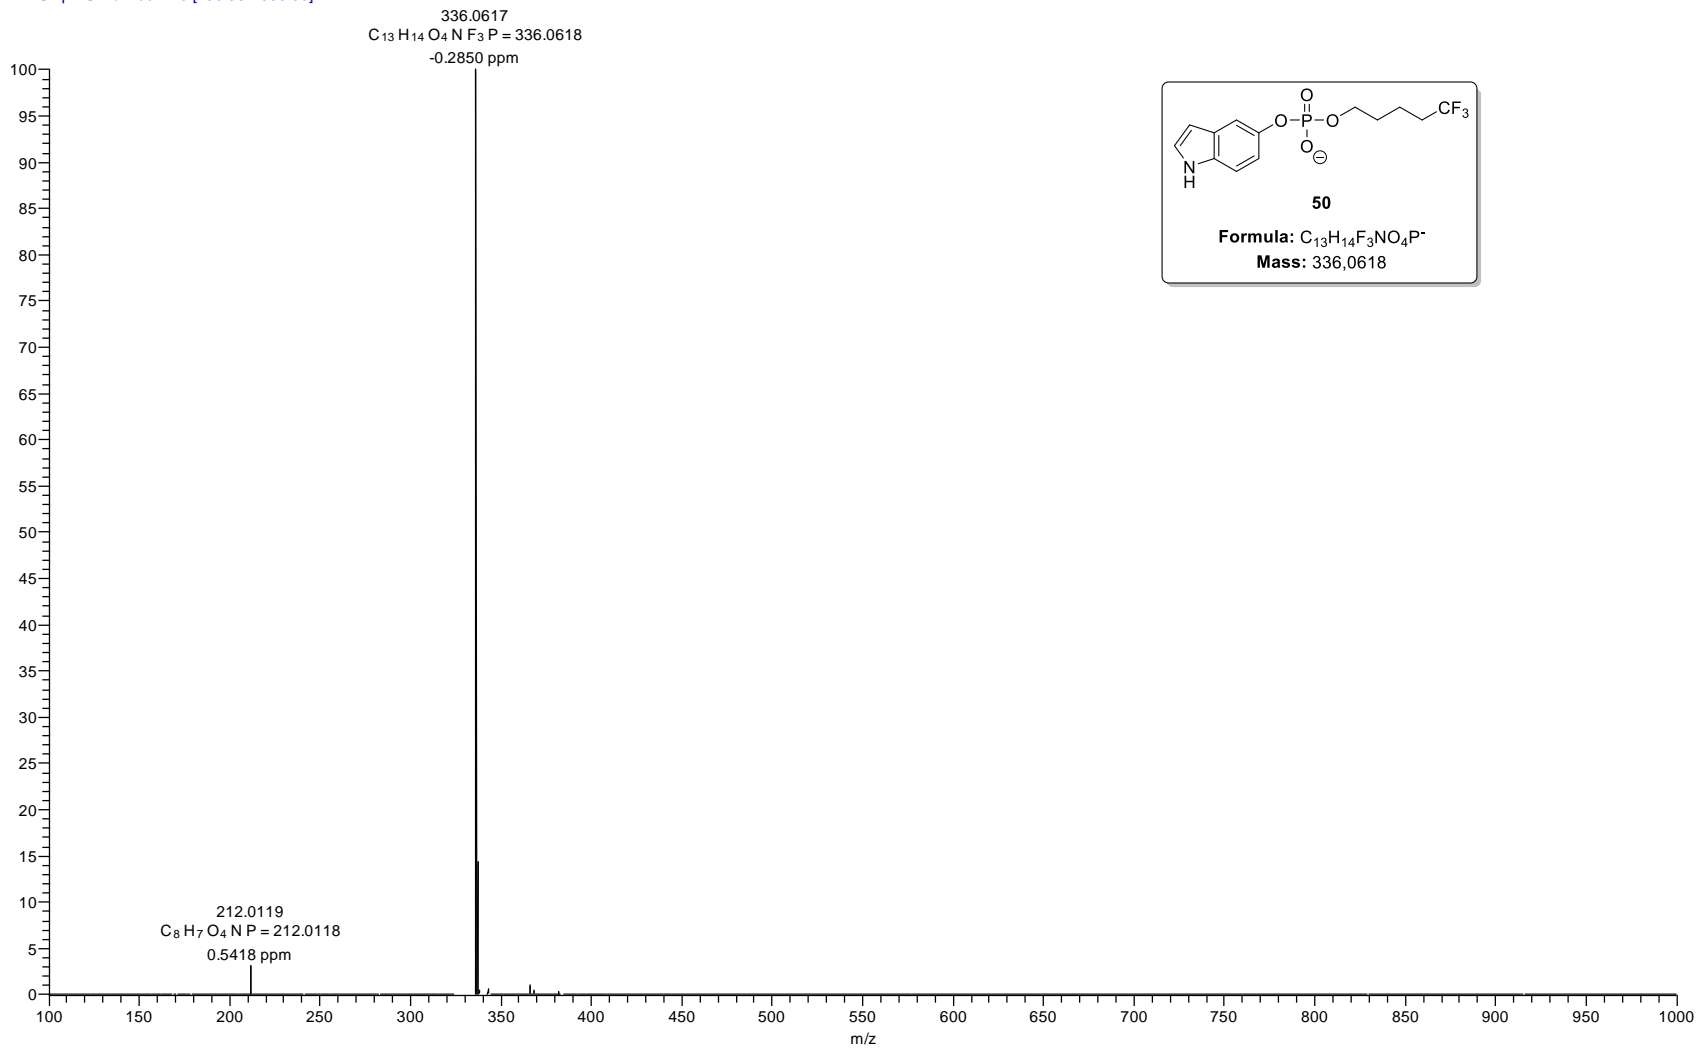

**HRMS (ESI) Analysis of compound 51: pyren-2-yl (5,5,5-trifluoropentyl) phosphate**

wejea31shr2 #1 RT: 0.02 AV: 1 NL: 5.51E8  
T: FTMS - p ESI Full ms [155.00-1200.00]

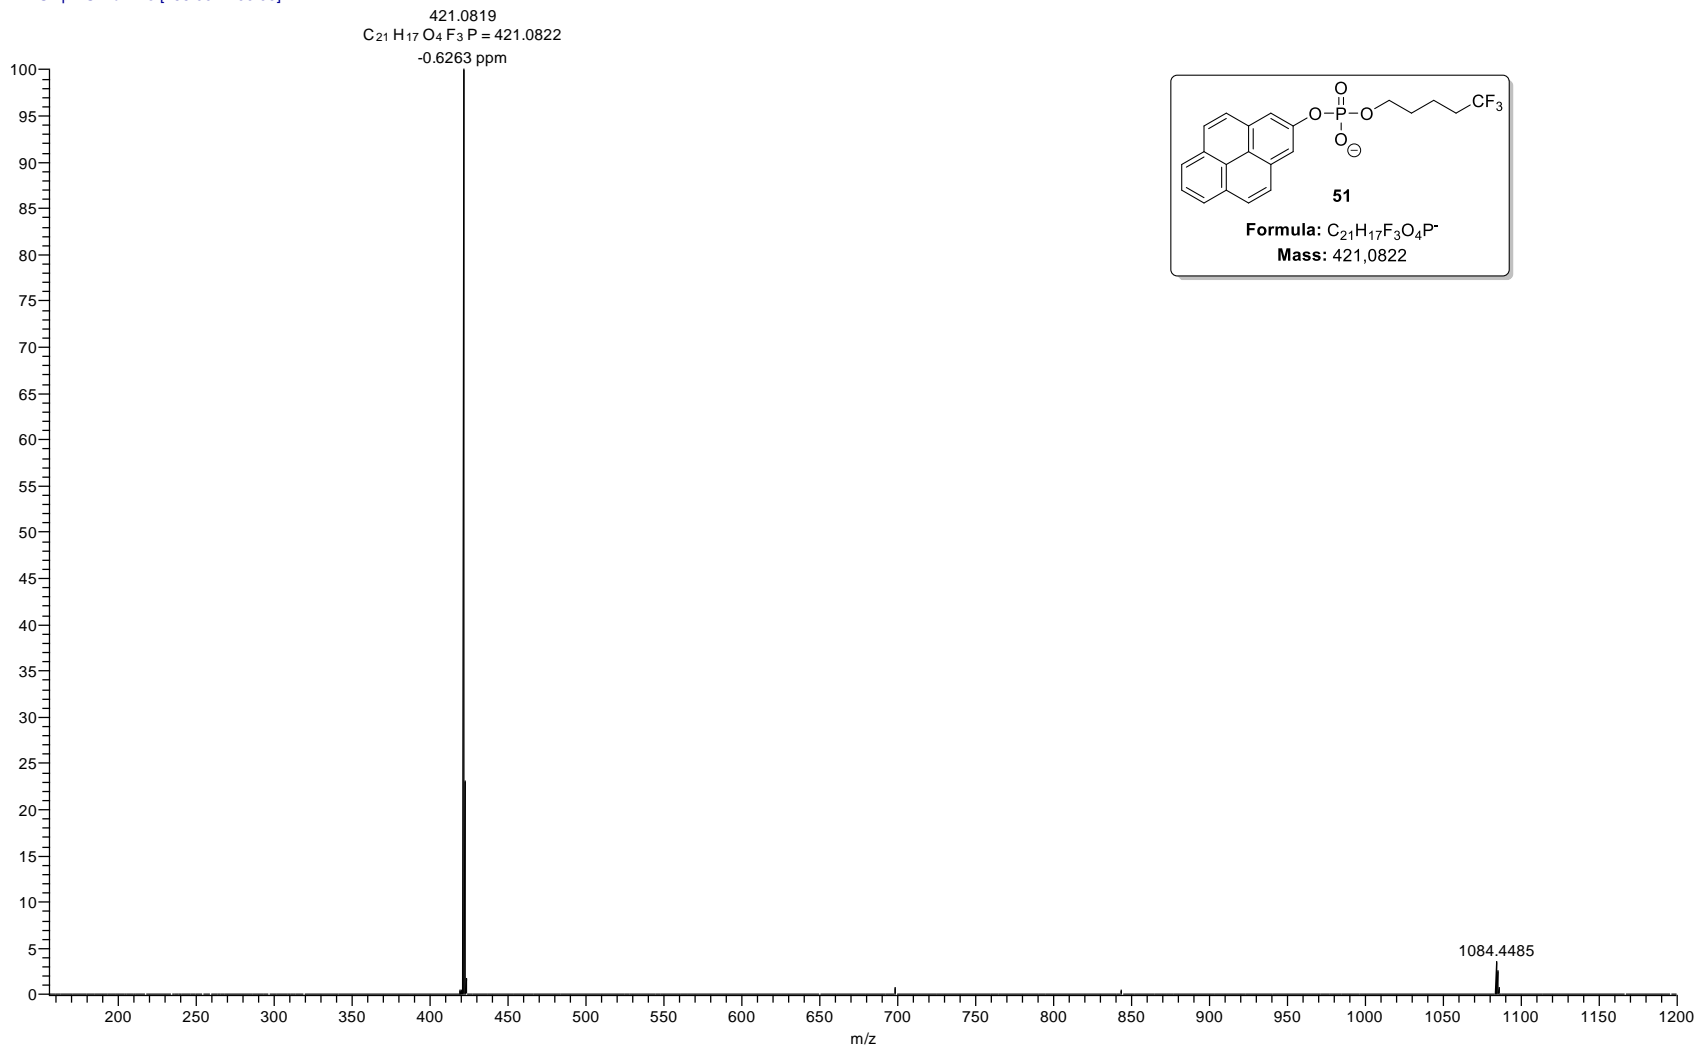

**HRMS (ESI) Analysis of compound 52: Diphenylphosphate**

hsjeb95shr1 #1 RT: 0.02 AV: 1 NL: 4.07E7  
T: FTMS - p ESI Full lock ms [100.00-800.00]

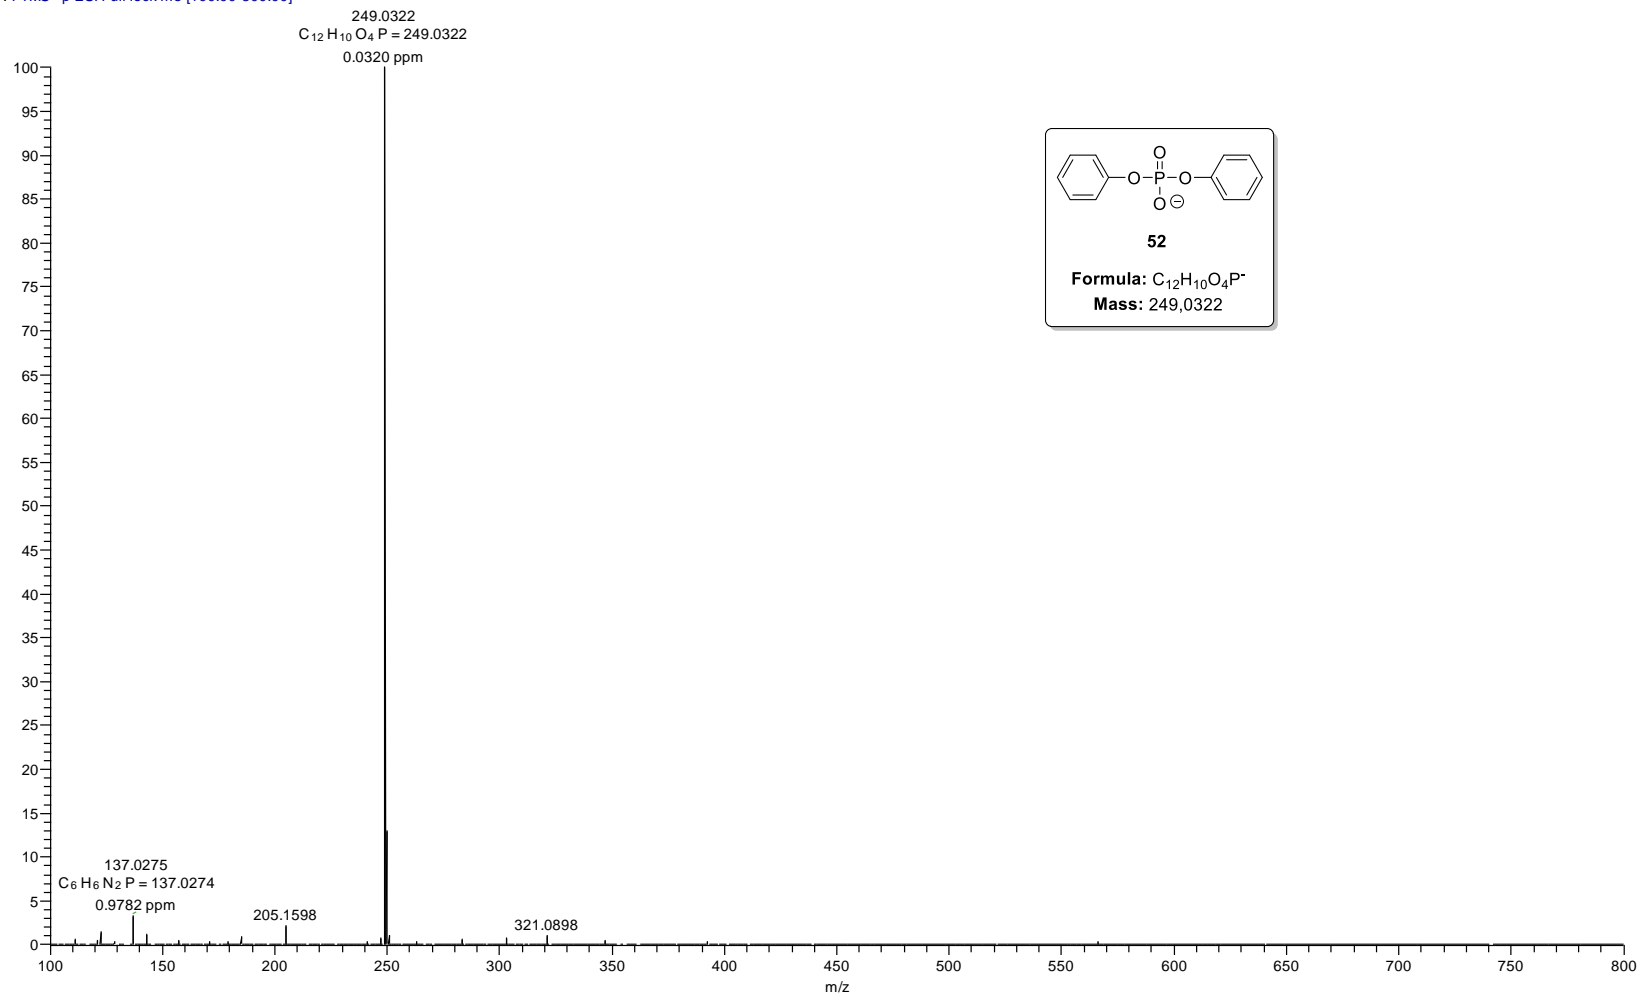

**HRMS (ESI) Analysis of compound 53: Pentyl-phenylphosphate**

hsjec23shr1 #1 RT: 0.02 AV: 1 NL: 2.18E8  
T: FTMS - p ESI Full lock ms [100.00-600.00]

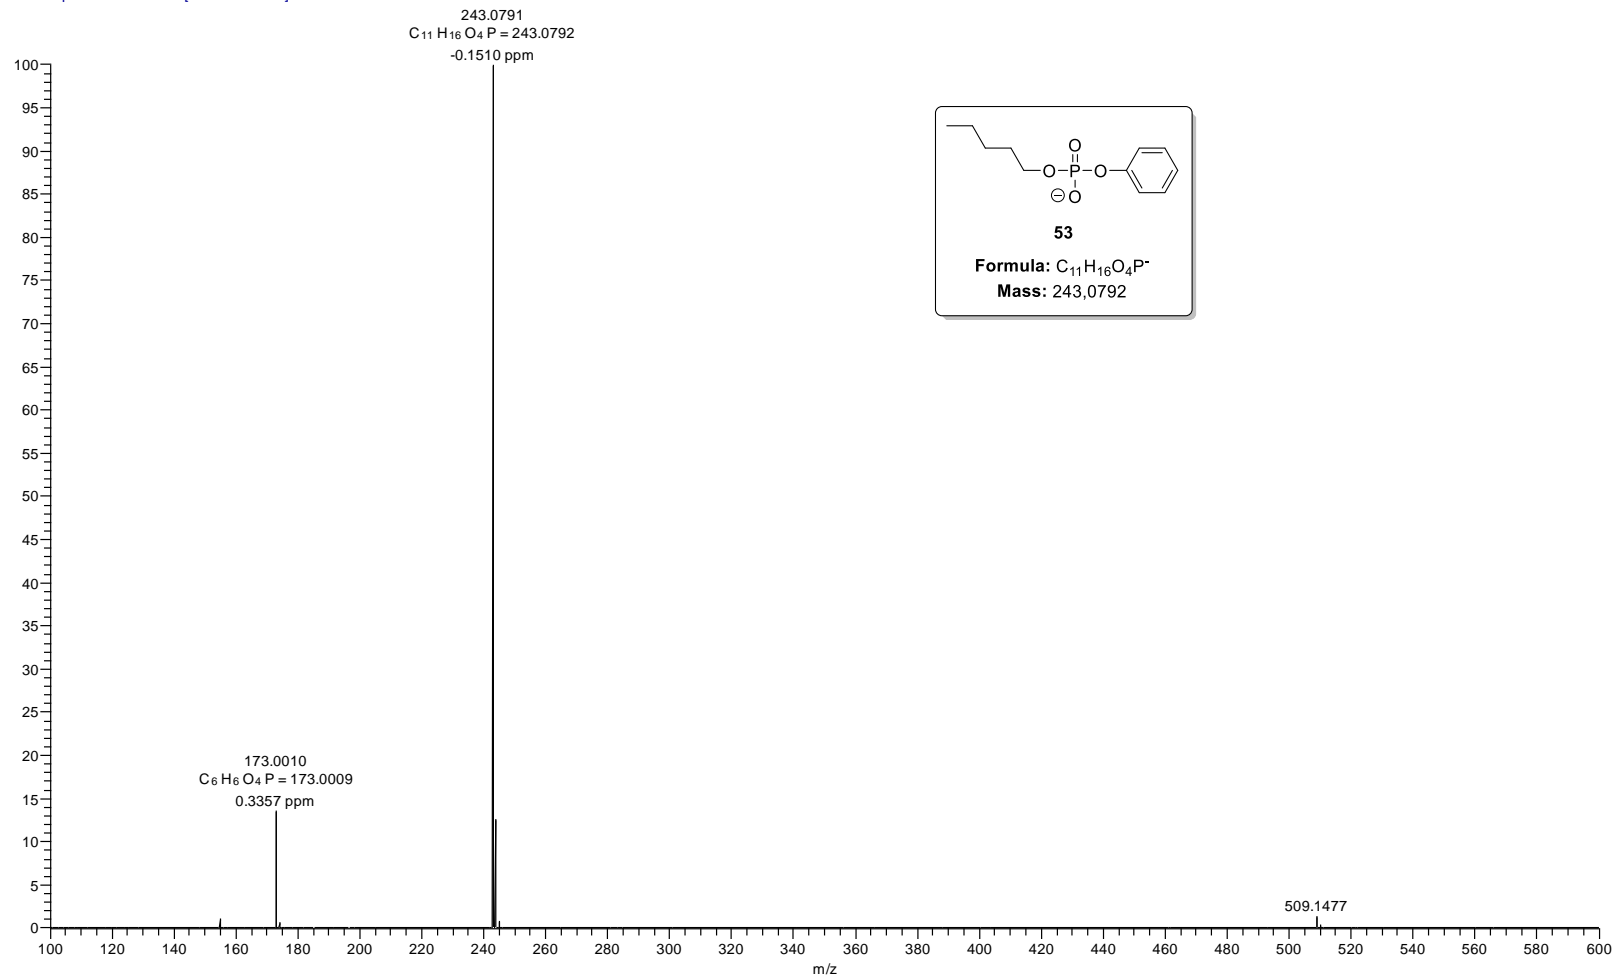

**HRMS (ESI) Analysis of compound 54: Phenyl-phenylphosphonate**

hsjeb96shr1 #1 RT: 0.02 AV: 1 NL: 1.41E8  
T: FTMS - p ESI Full lock ms [100.00-800.00]

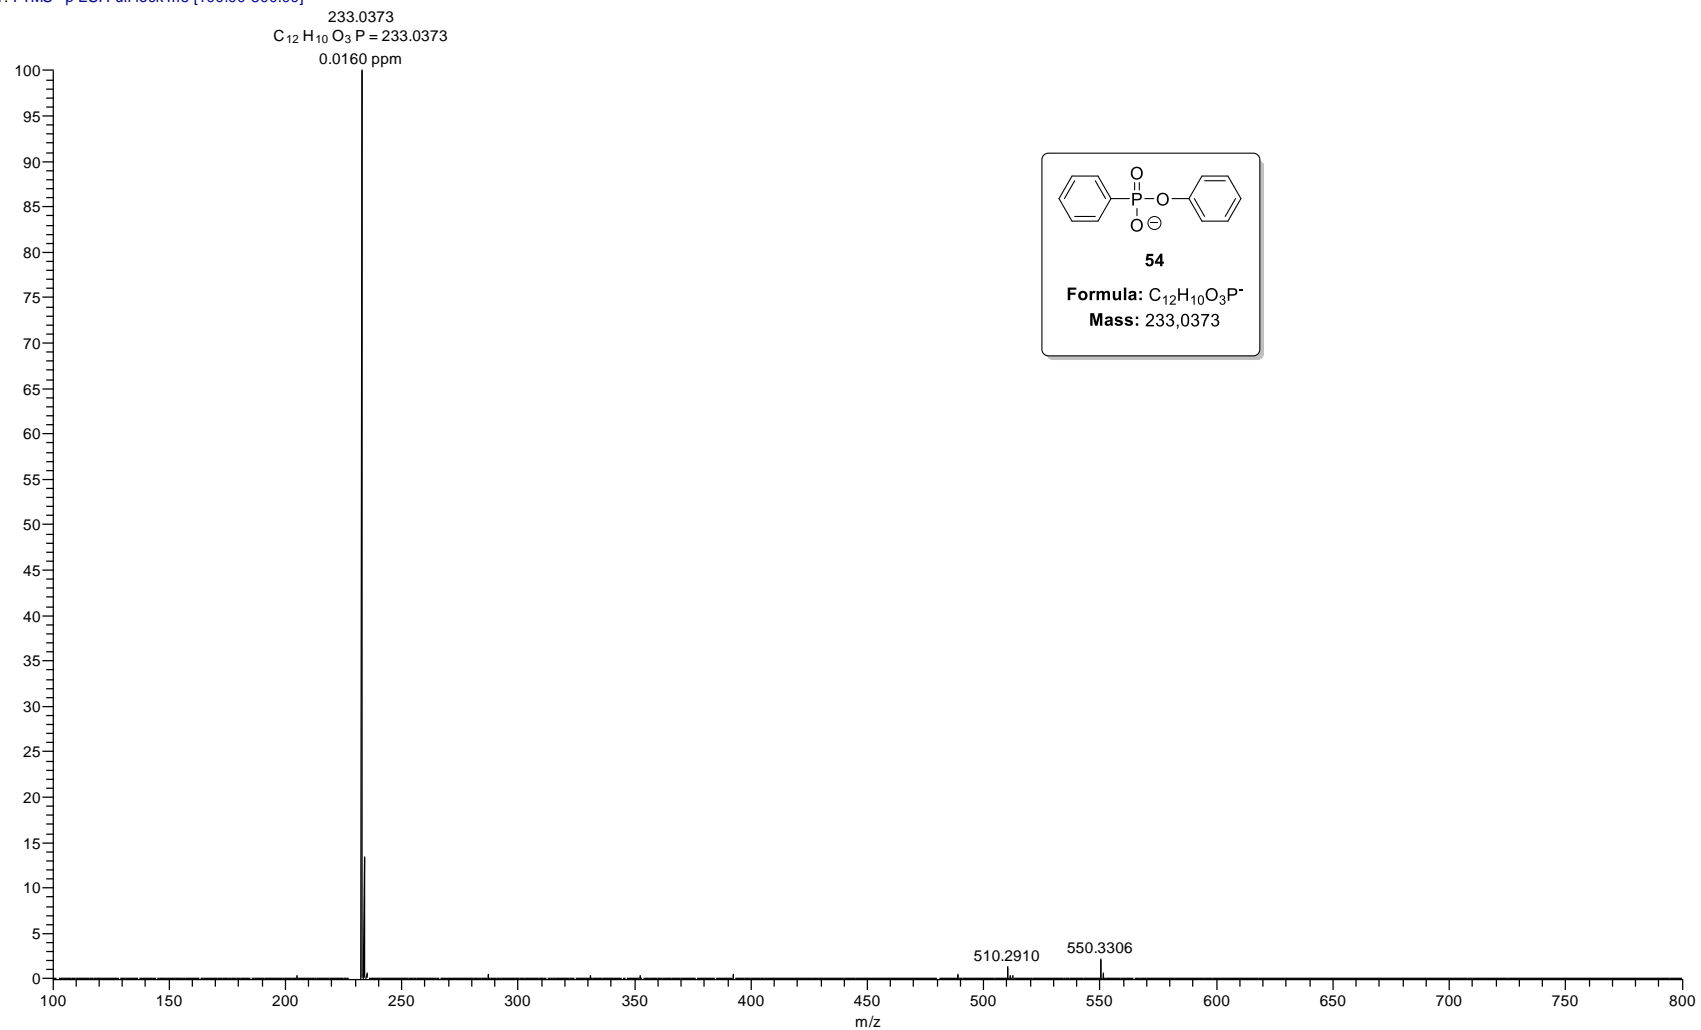

**HRMS (ESI) Analysis of compound 55: Pent-4-yn-1-yl-phenylphosphate**

hsjec02shr1 #1 RT: 0.02 AV: 1 NL: 4.64E8  
T: FTMS - p ESI Full ms [100.00-700.00]

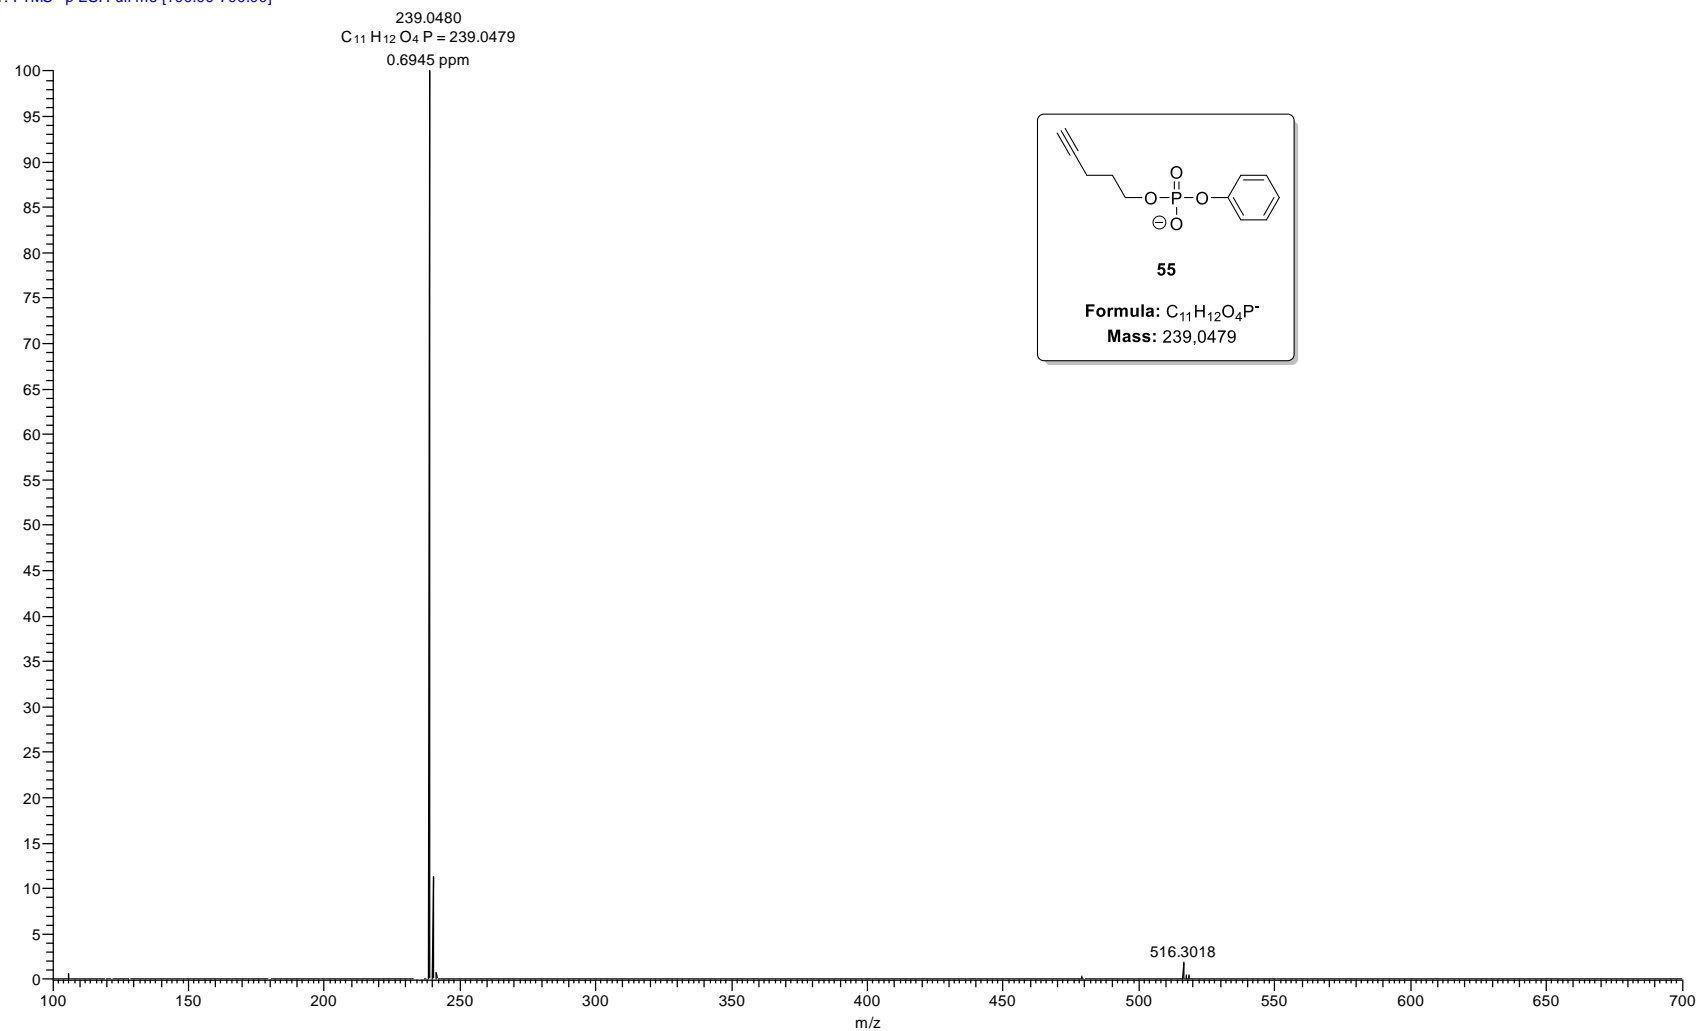



**HRMS (ESI) Analysis of compound 56: Isoprenol-phenylphosphate**

hsjec24shr1 #1 RT: 0.02 AV: 1 NL: 3.16E7  
T: FTMS - p ESI Full lock ms [100.00-600.00]

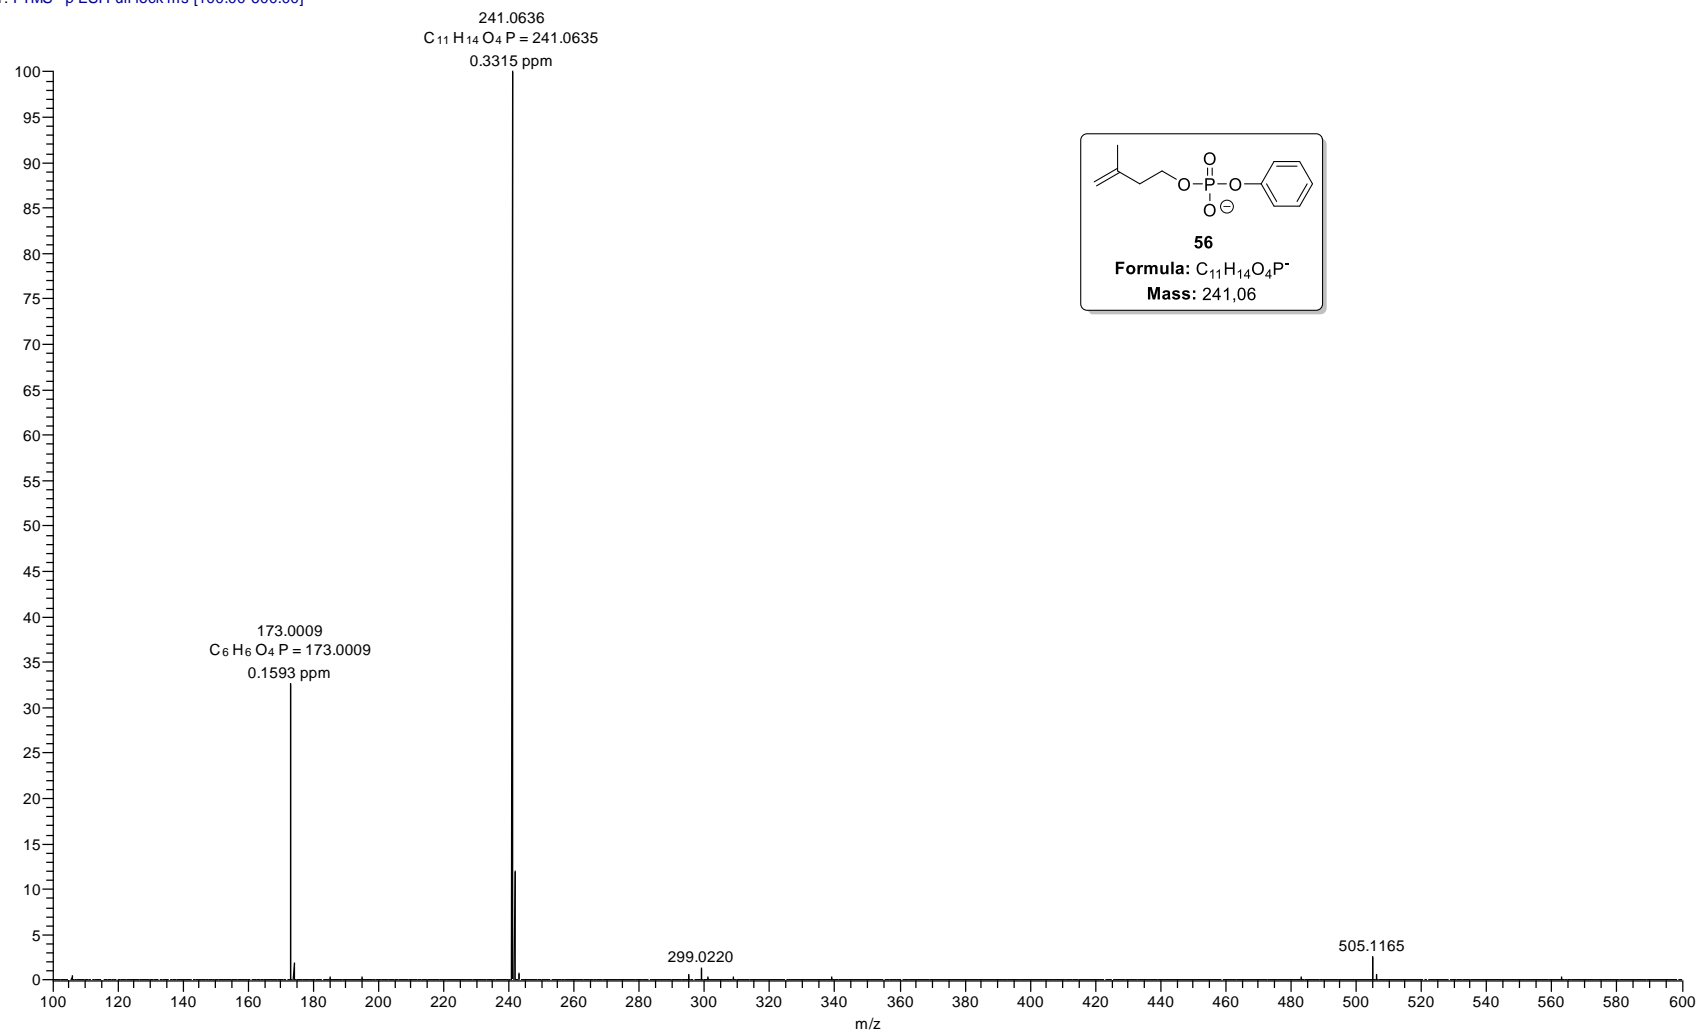

**HRMS (ESI) Analysis of compound 57: Geranyl-phenylphosphate**

hsjec39shr1 #1 RT: 0.02 AV: 1 NL: 2.25E8  
T: FTMS - p ESI Full ms [100.00-800.00]

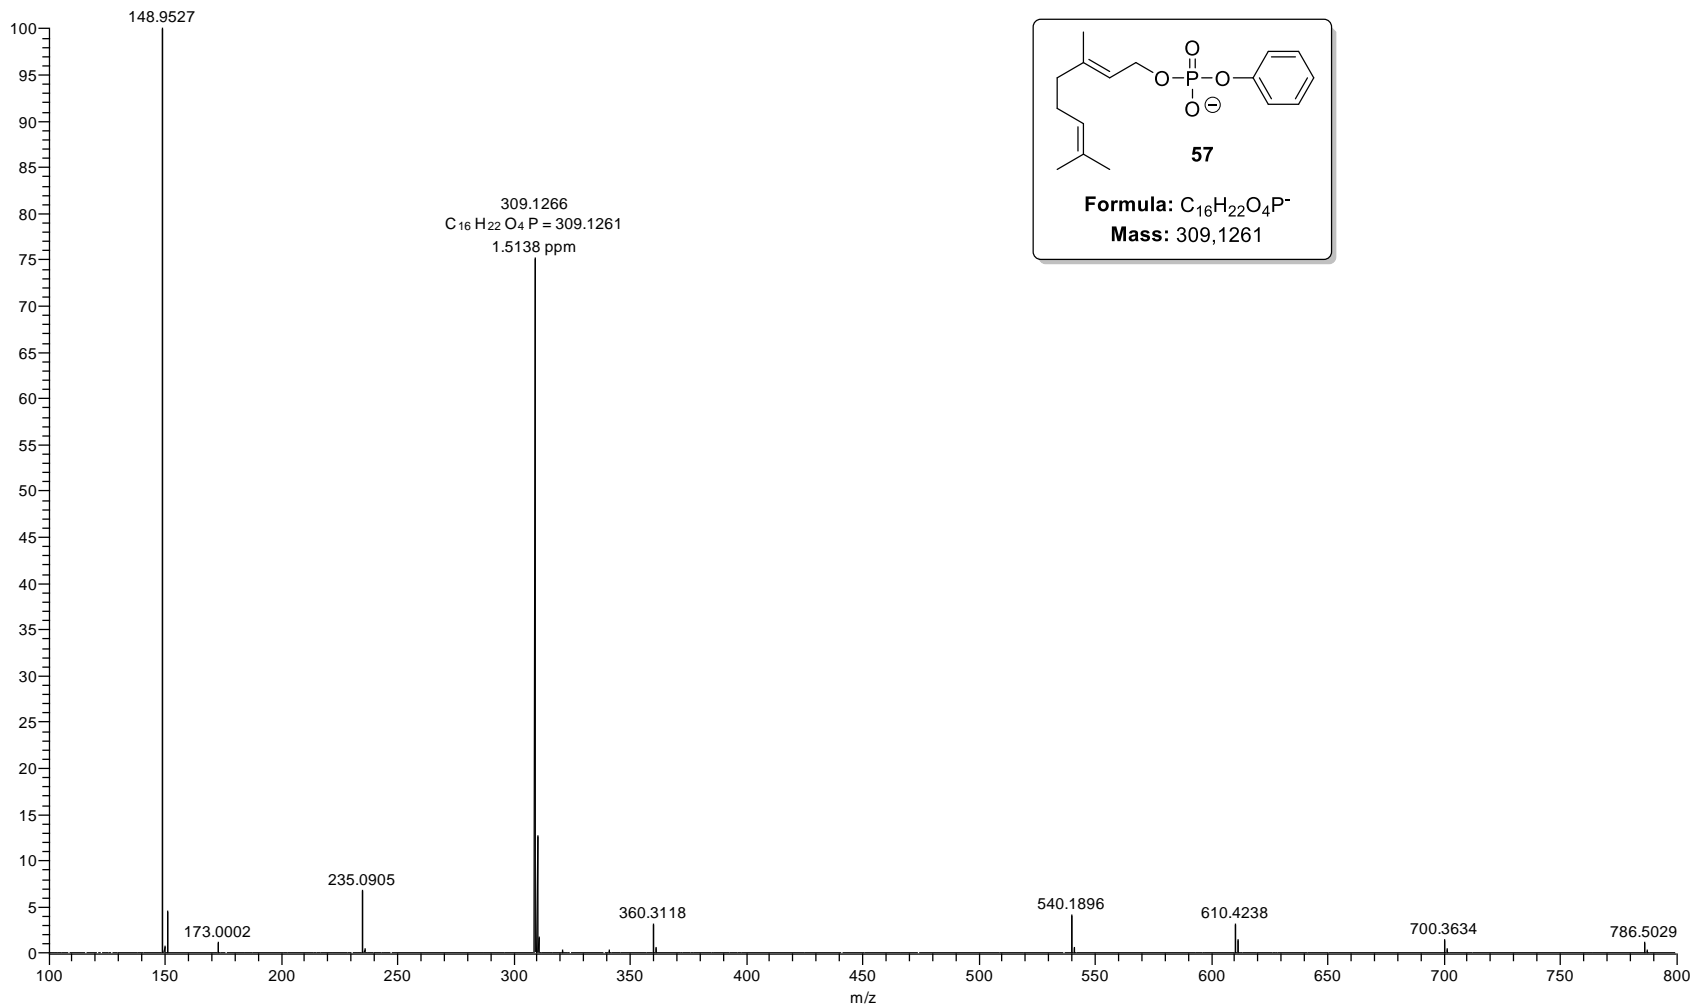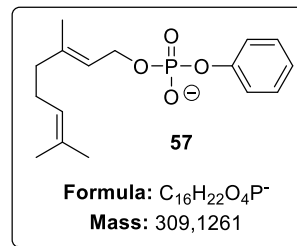

**HRMS (ESI) Analysis of compound 58: D4T-phenylpyrophosphate**

hsjec06shr1 #1 RT: 0.02 AV: 1 NL: 4.35E8  
T: FTMS - p ESI Full lock ms [100.00-600.00]

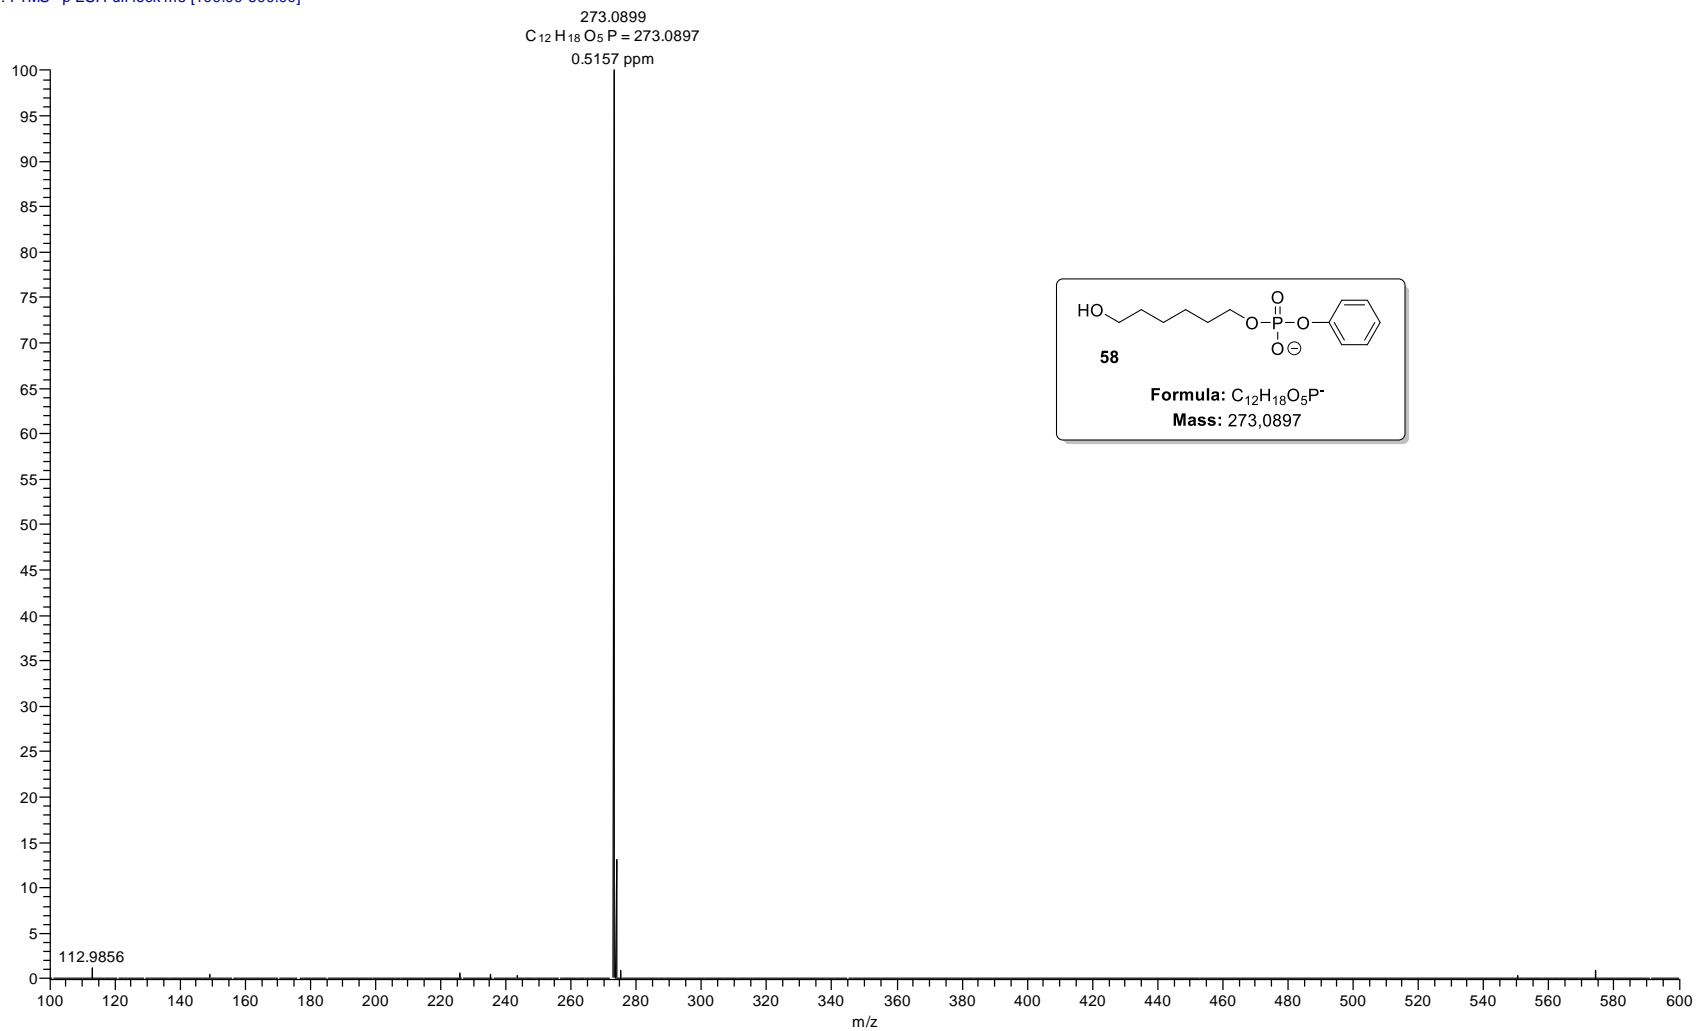

**HRMS (ESI) Analysis of compound 59: D4T-phenylphosphate**

hsjec15shr3 #1 RT: 0.02 AV: 1 NL: 2.31E8  
T: FTMS - p ESI Full lock ms [100.00-1000.00]

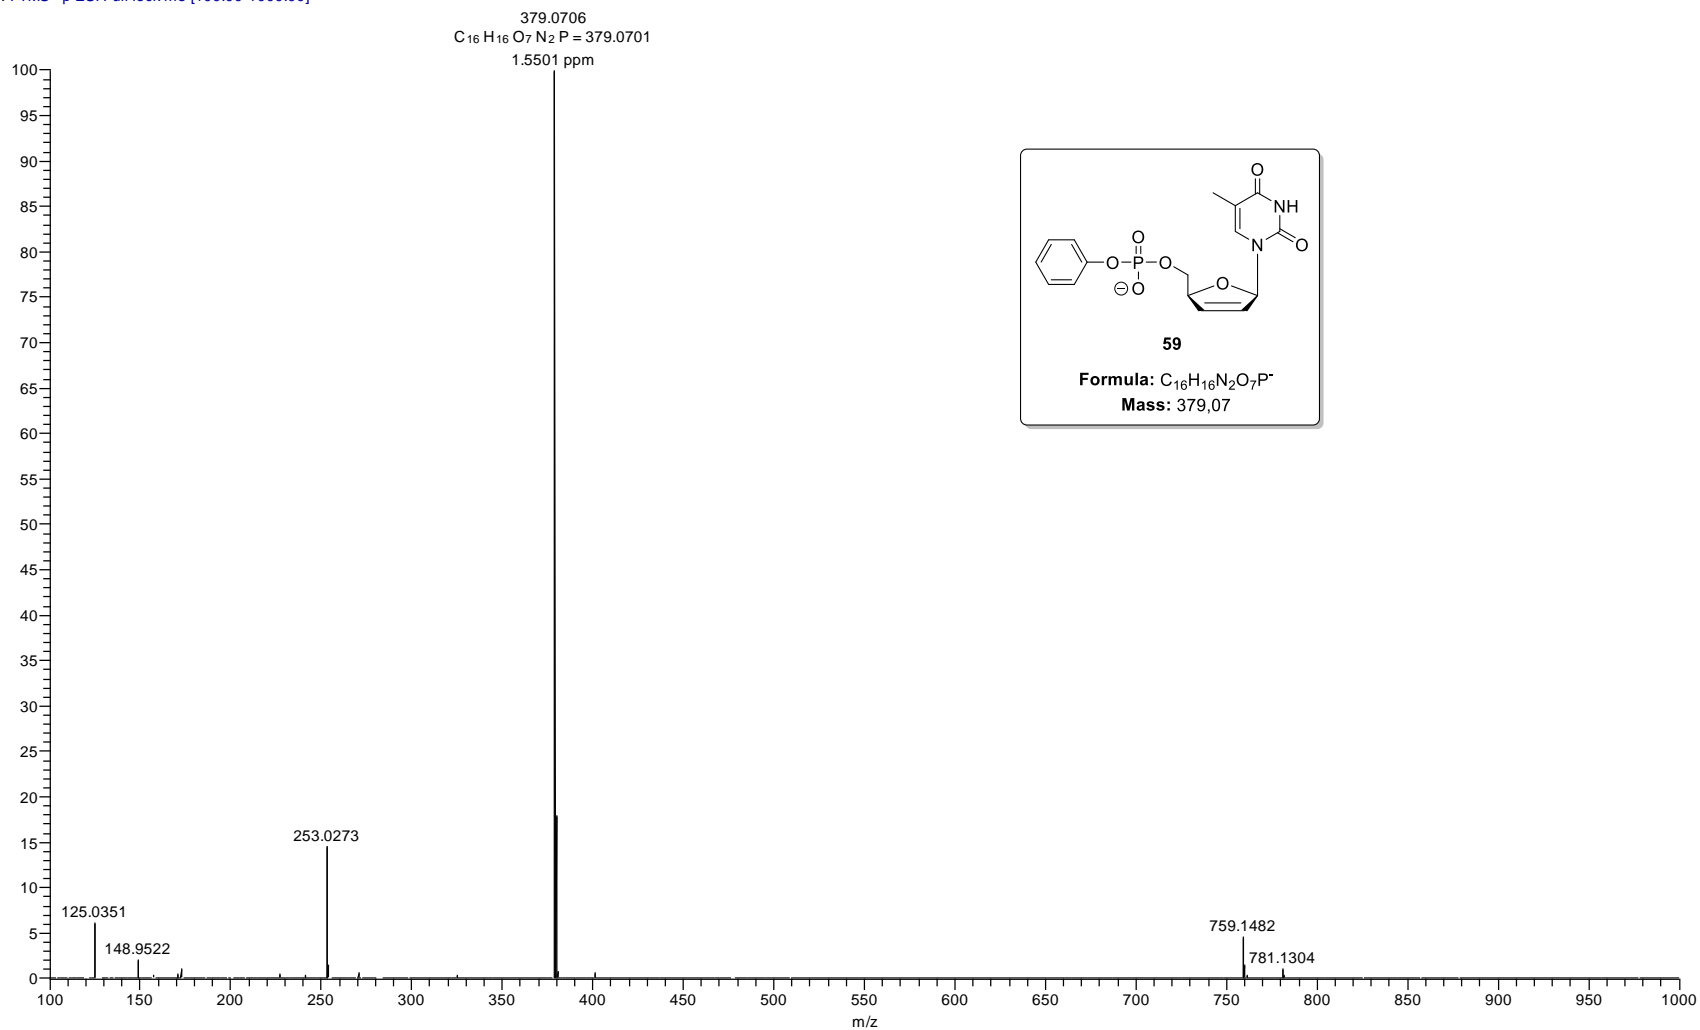

**HRMS (ESI) Analysis of compound 60: D4T-phenylpyrophosphate**

hsjec20shr4 #1 RT: 0.02 AV: 1 NL: 8.26E6  
T: FTMS - p ESI Full lock ms [100.00-1000.00]

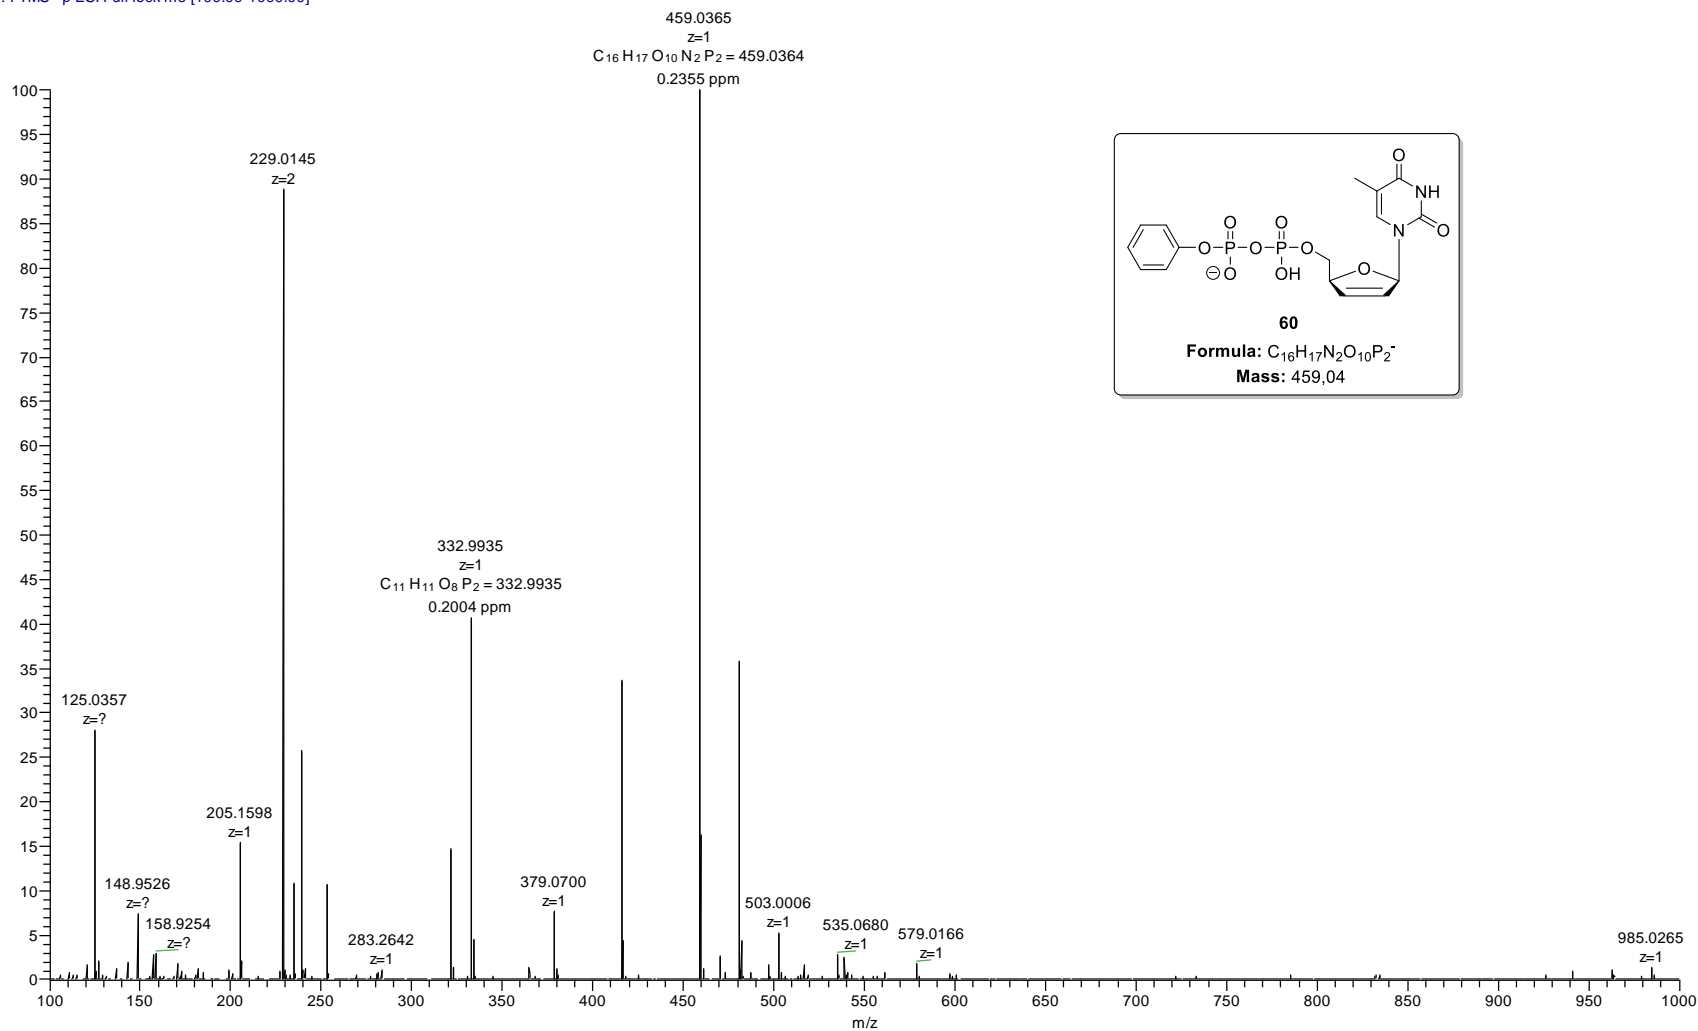

**HRMS (ESI) Analysis of compound 61: Diphenylpyrophosphate**

hsjec18shr1 #1 RT: 0.02 AV: 1 NL: 6.23E8  
T: FTMS - p ESI Full ms [100.00-700.00]

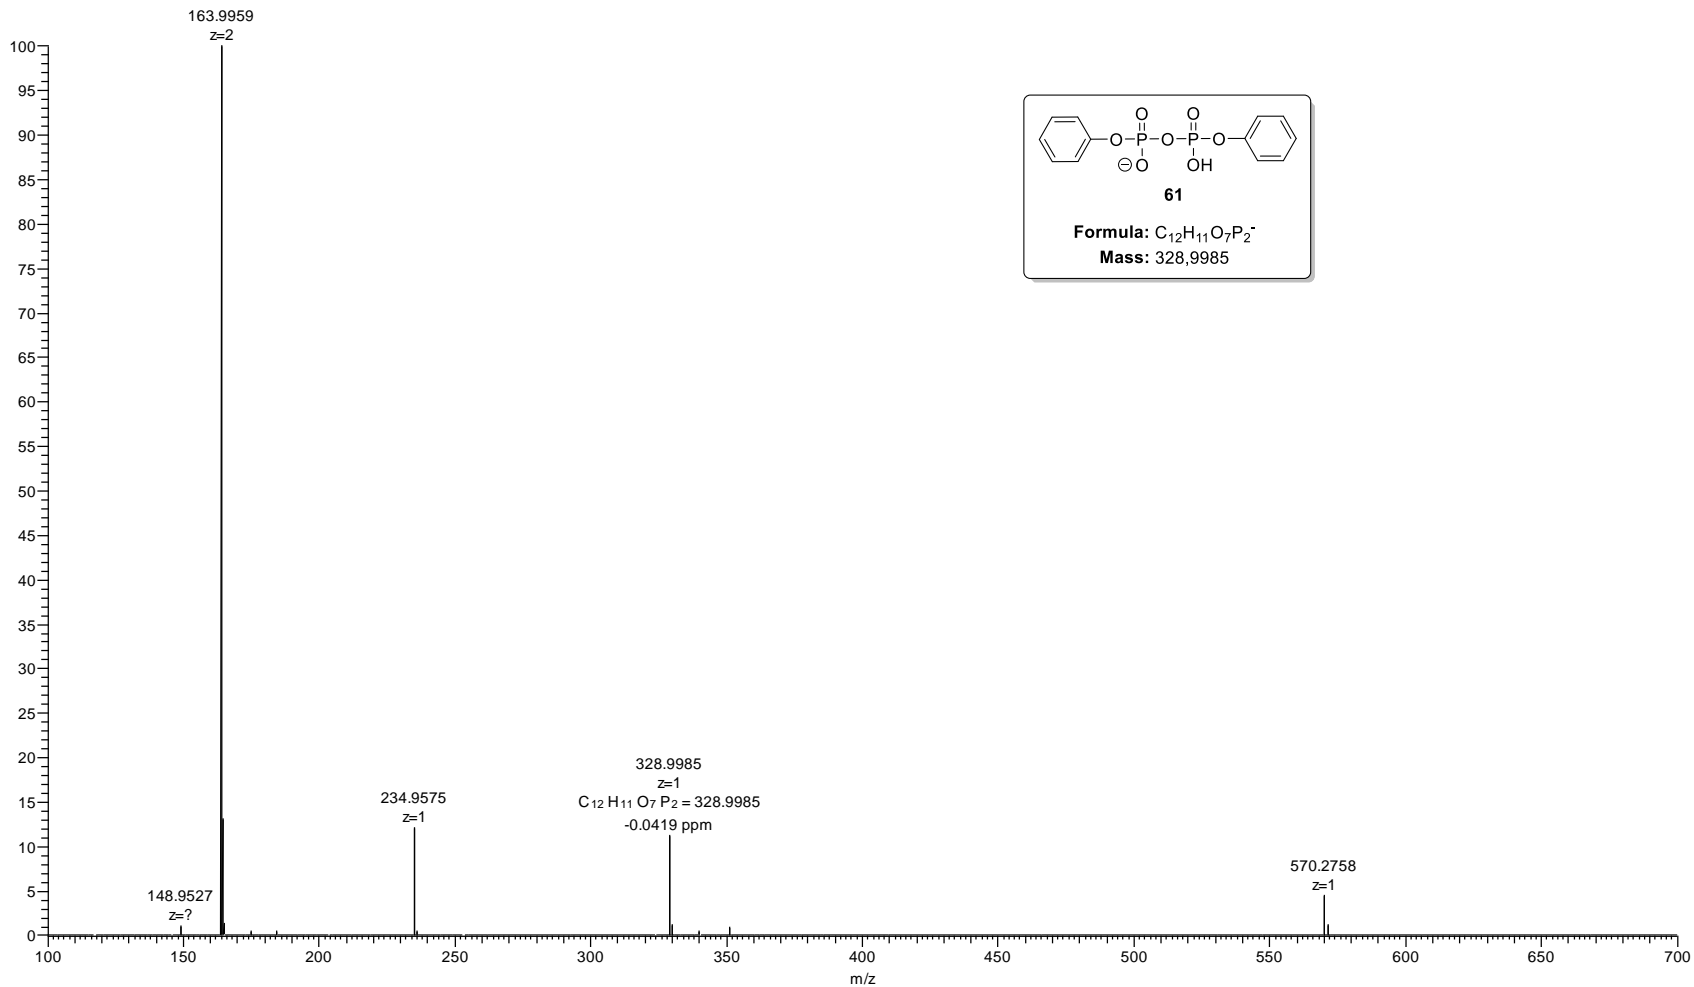

**HRMS (ESI) Analysis of compound 67: Pentylphosphate**

hsjec04shr4 #1 RT: 0.02 AV: 1 NL: 3.78E7  
T: FTMS - p ESI Full lock ms [60.00-400.00]

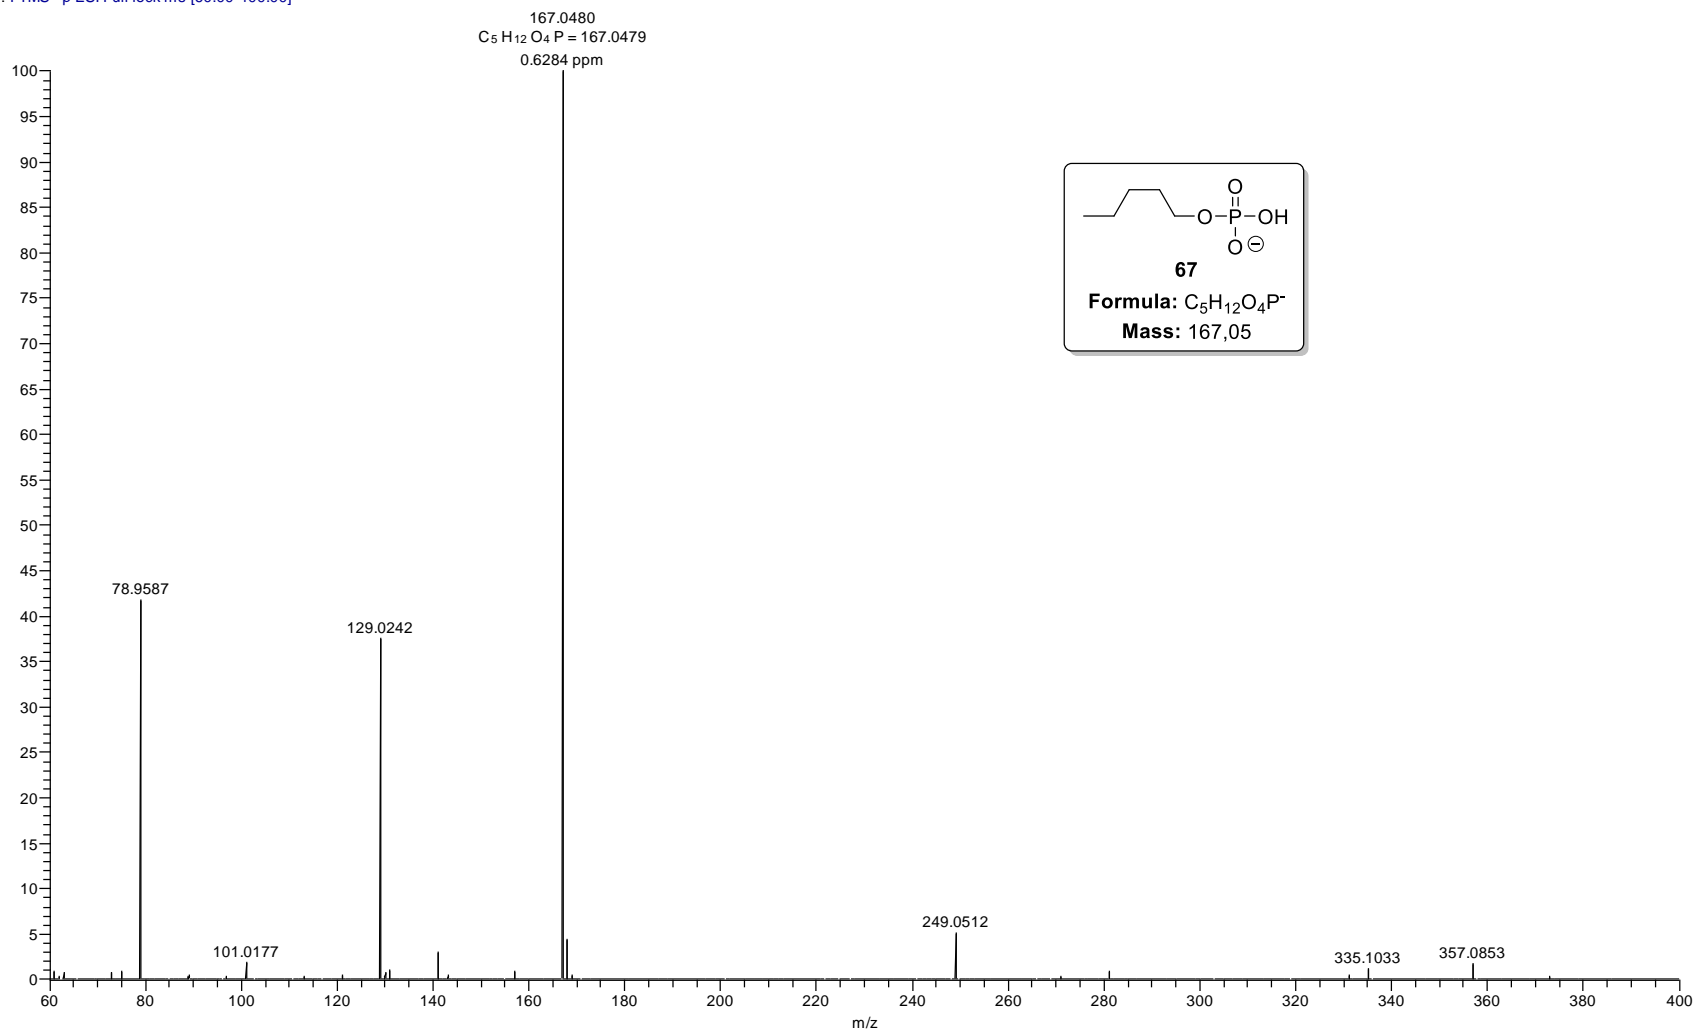

**HRMS (ESI) Analysis of compound 70: Pentametaphosphate**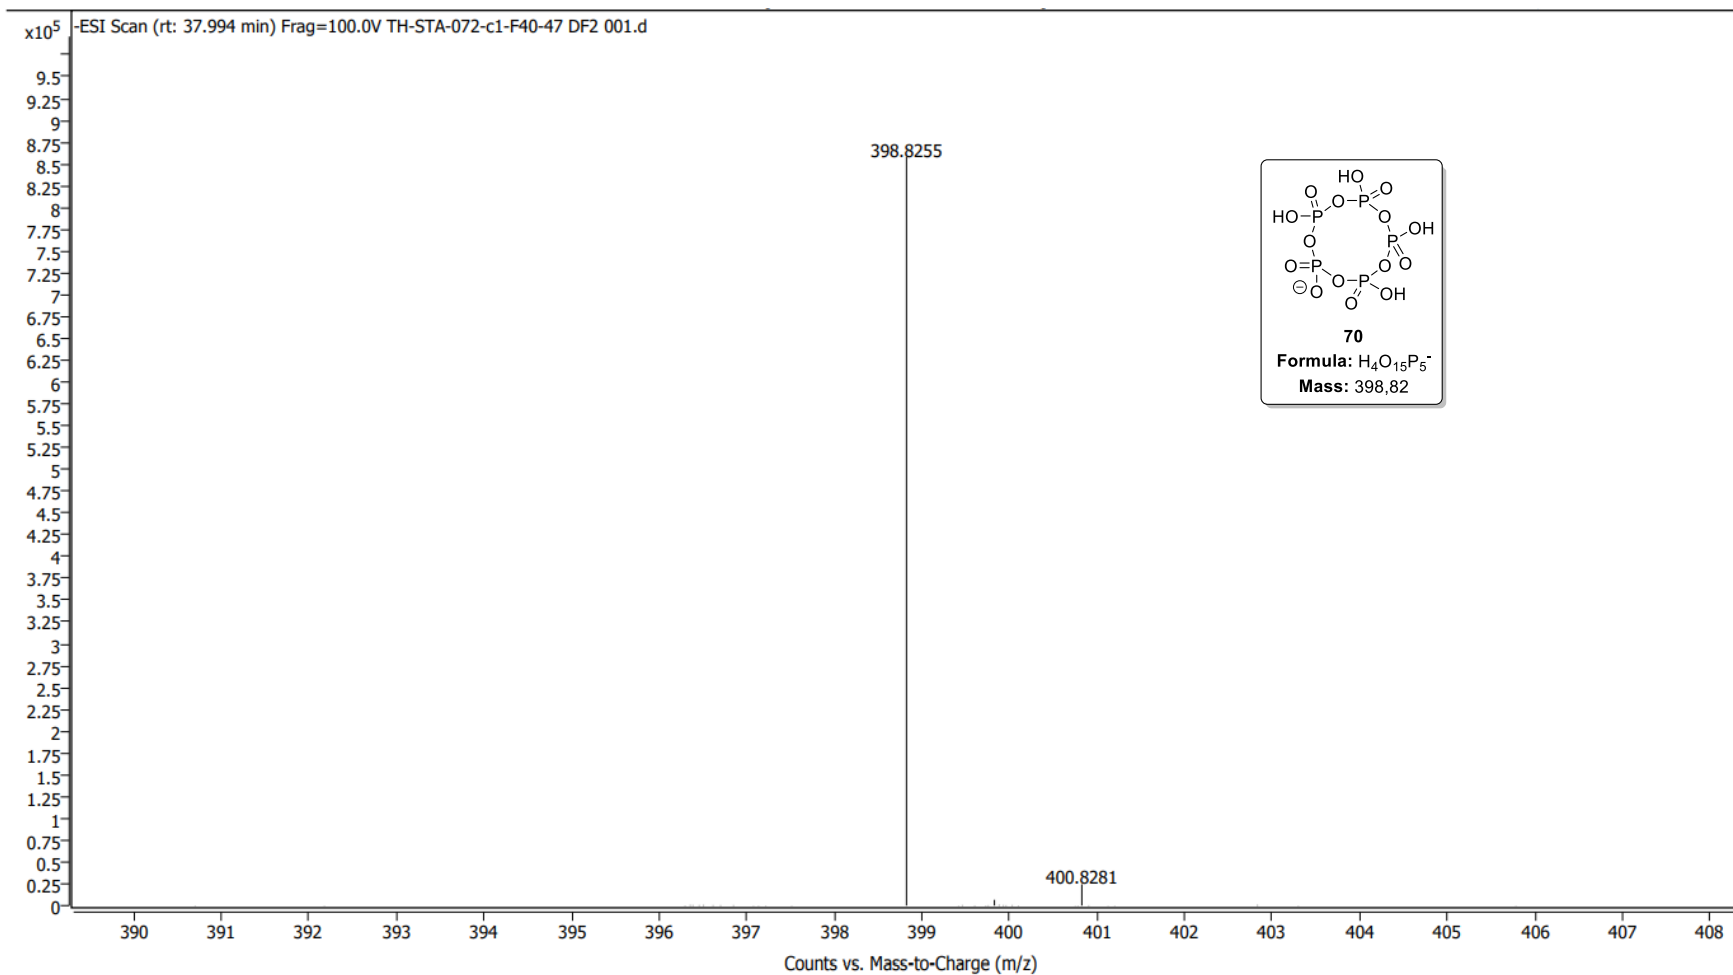



**HRMS (ESI) Analysis of compound 71: Heptametaphosphate**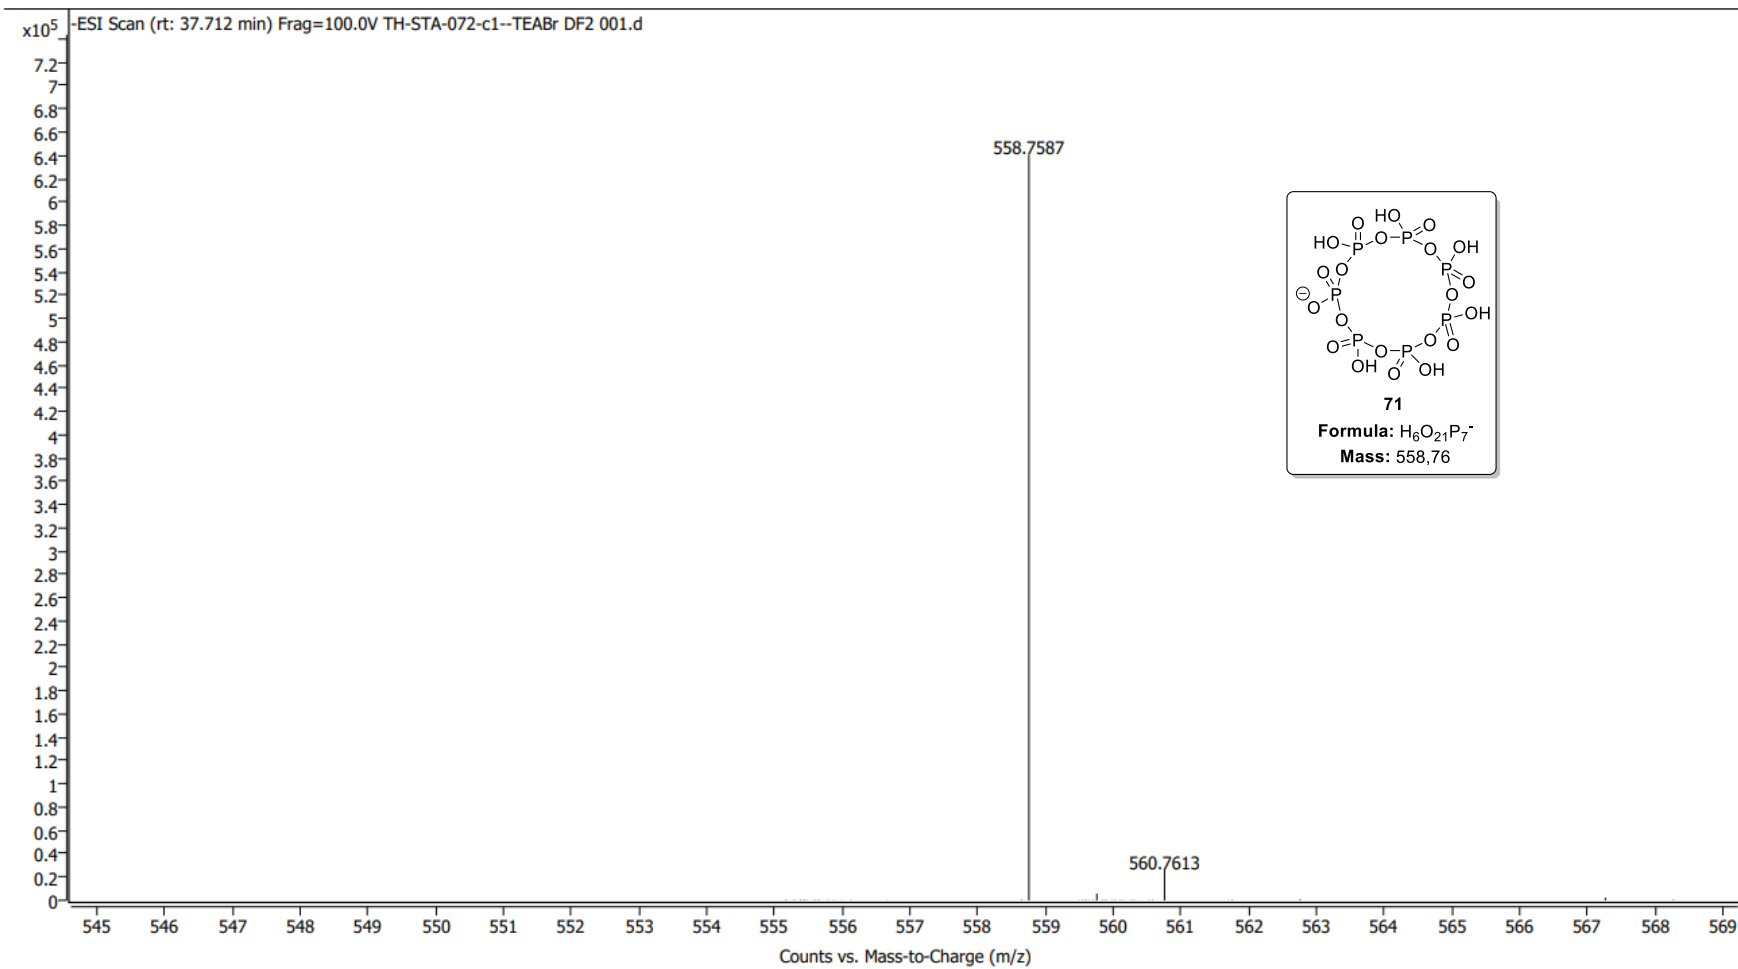

**HRMS (ESI) Analysis of compound 72: Octametaphosphate**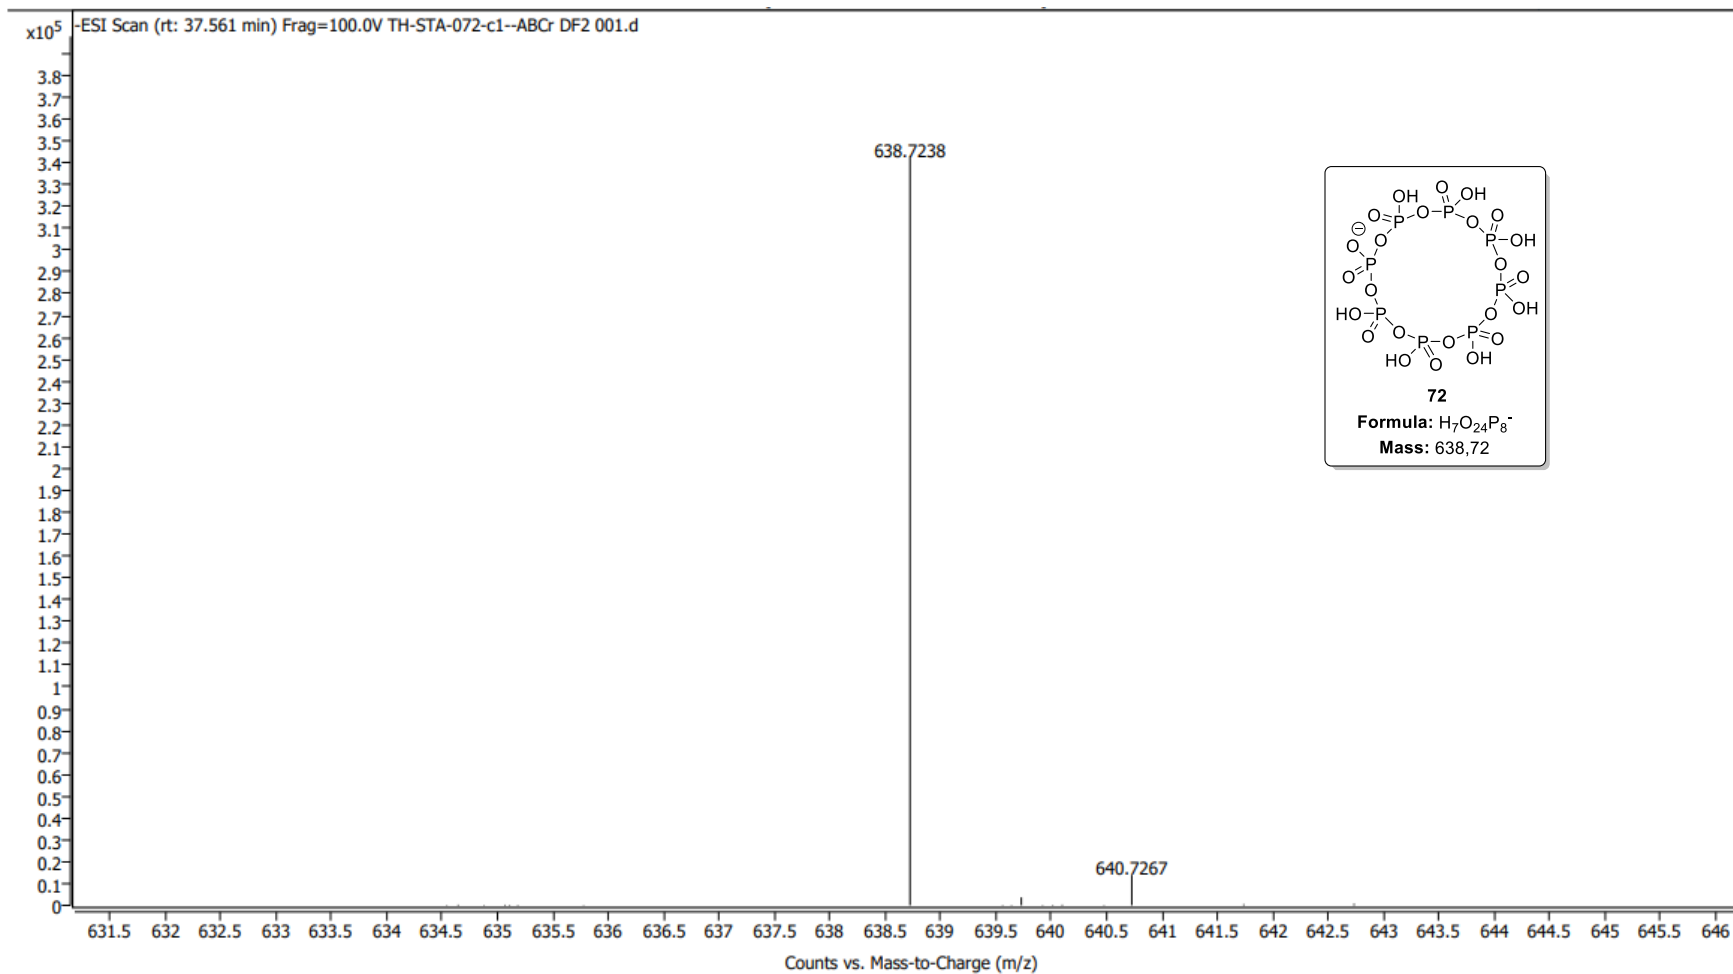

**HRMS (ESI) Analysis of compound 73: Phenylcyclotriphosphate**

hsjec42shr2 #1 RT: 0.02 AV: 1 NL: 1.14E8  
T: FTMS - p ESI Full lock ms [50.00-800.00]

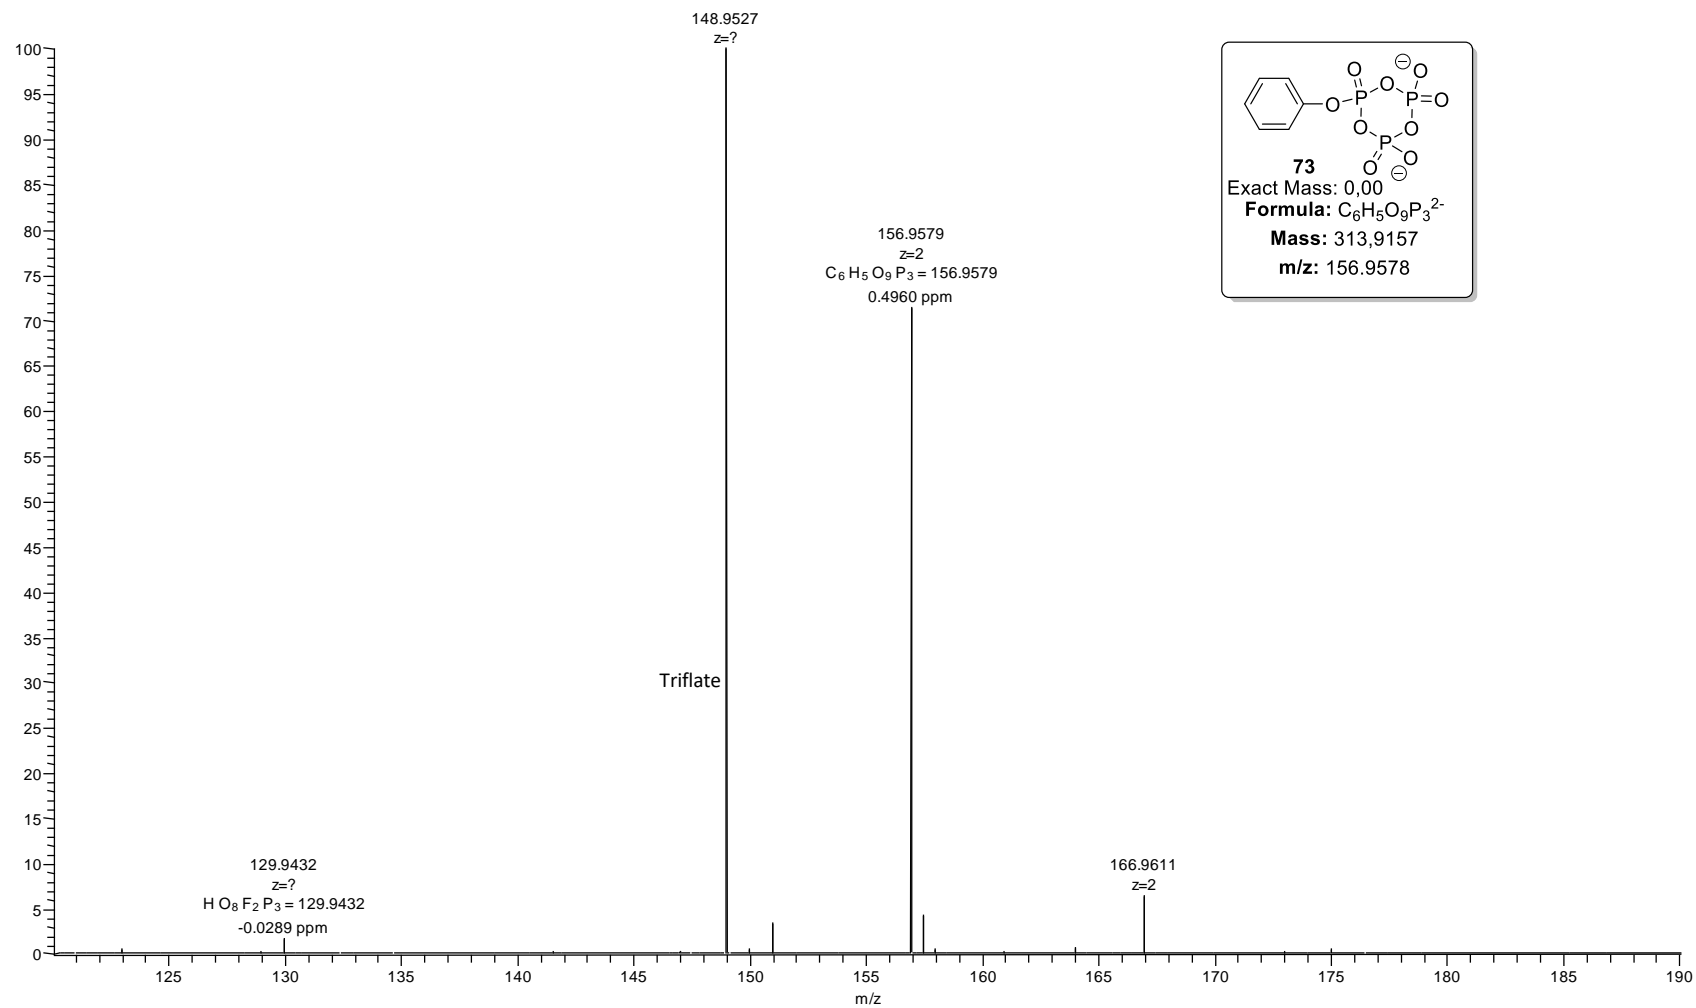

**HRMS (ESI) Analysis of compound 74: Phenylcyclotetraphosphate**

hsjec44shr3 #1 RT: 0.02 AV: 1 NL: 9.46E4  
T: FTMS - p ESI Full lock ms [70.00-800.00]

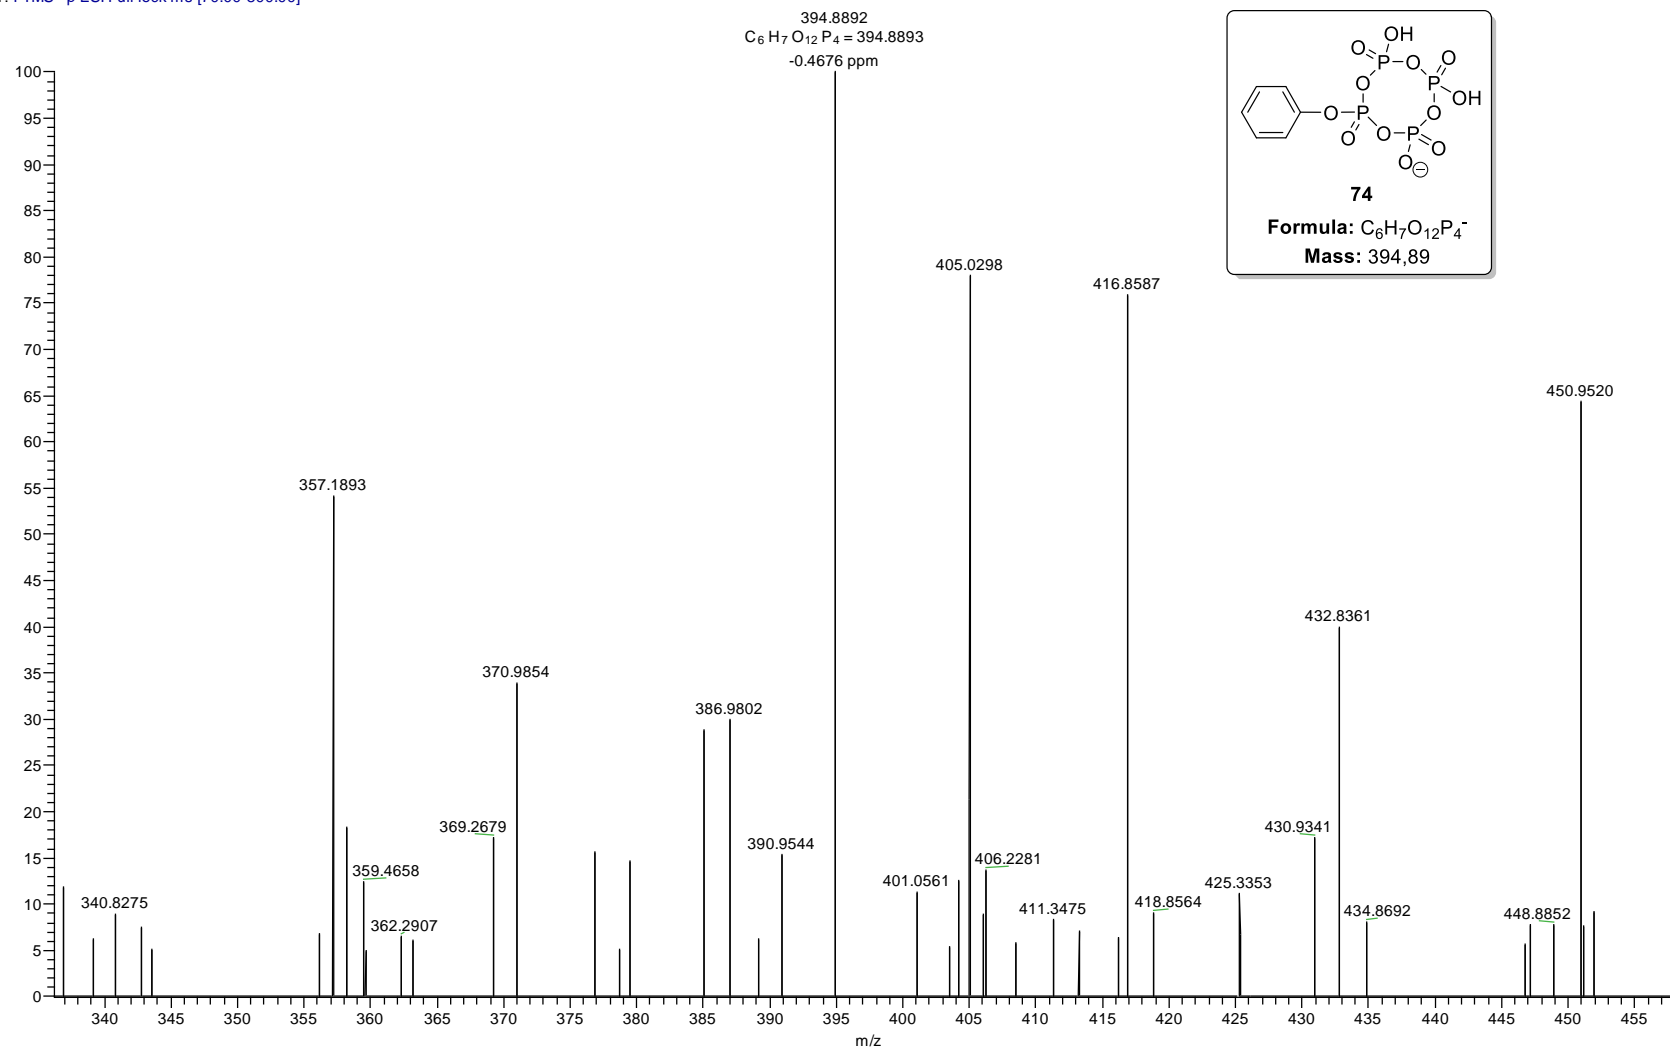

## HRMS (ESI) Analysis of compound 78: PhenylP<sub>3</sub>-propargylamidate

hsjec03shr4 #1 RT: 0.02 AV: 1 NL: 8.48E6  
T: FTMS - p ESI Full lock ms [100.00-700.00]

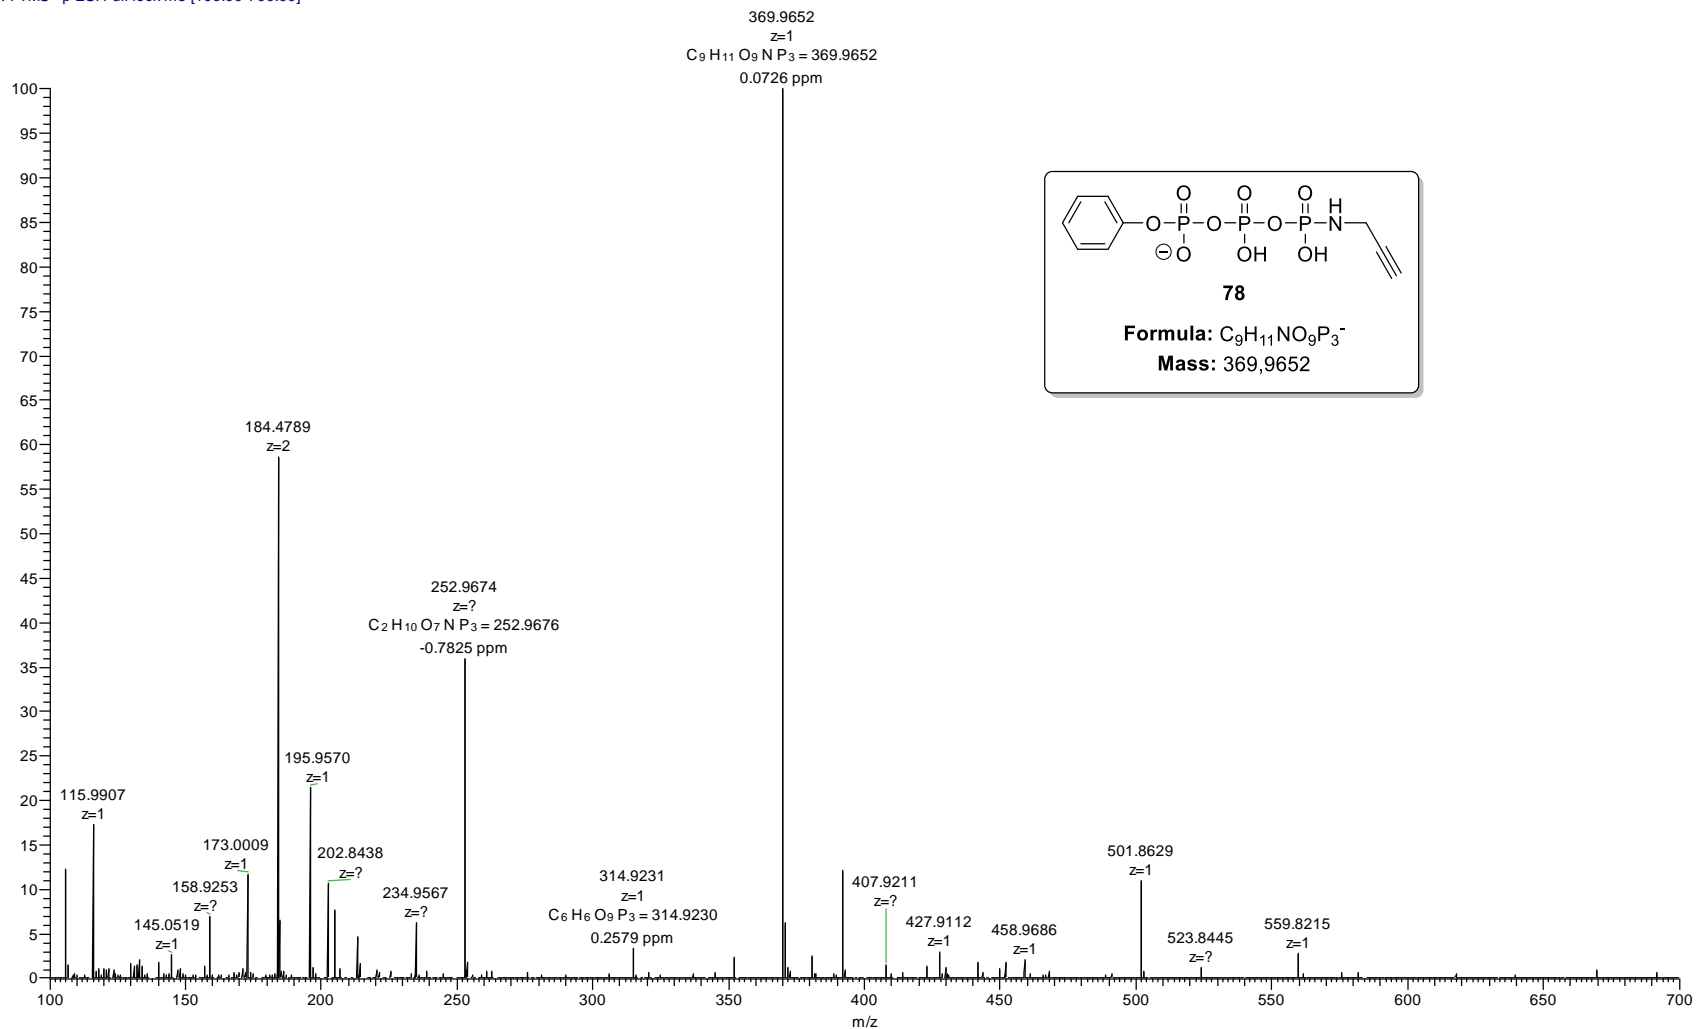

**HRMS (ESI) Analysis of compound 79: PhenylP<sub>3</sub>-amidate**

hsjec41shr7 #1 RT: 0.02 AV: 1 NL: 7.73E6  
T: FTMS - p ESI Full ms [100.00-800.00]

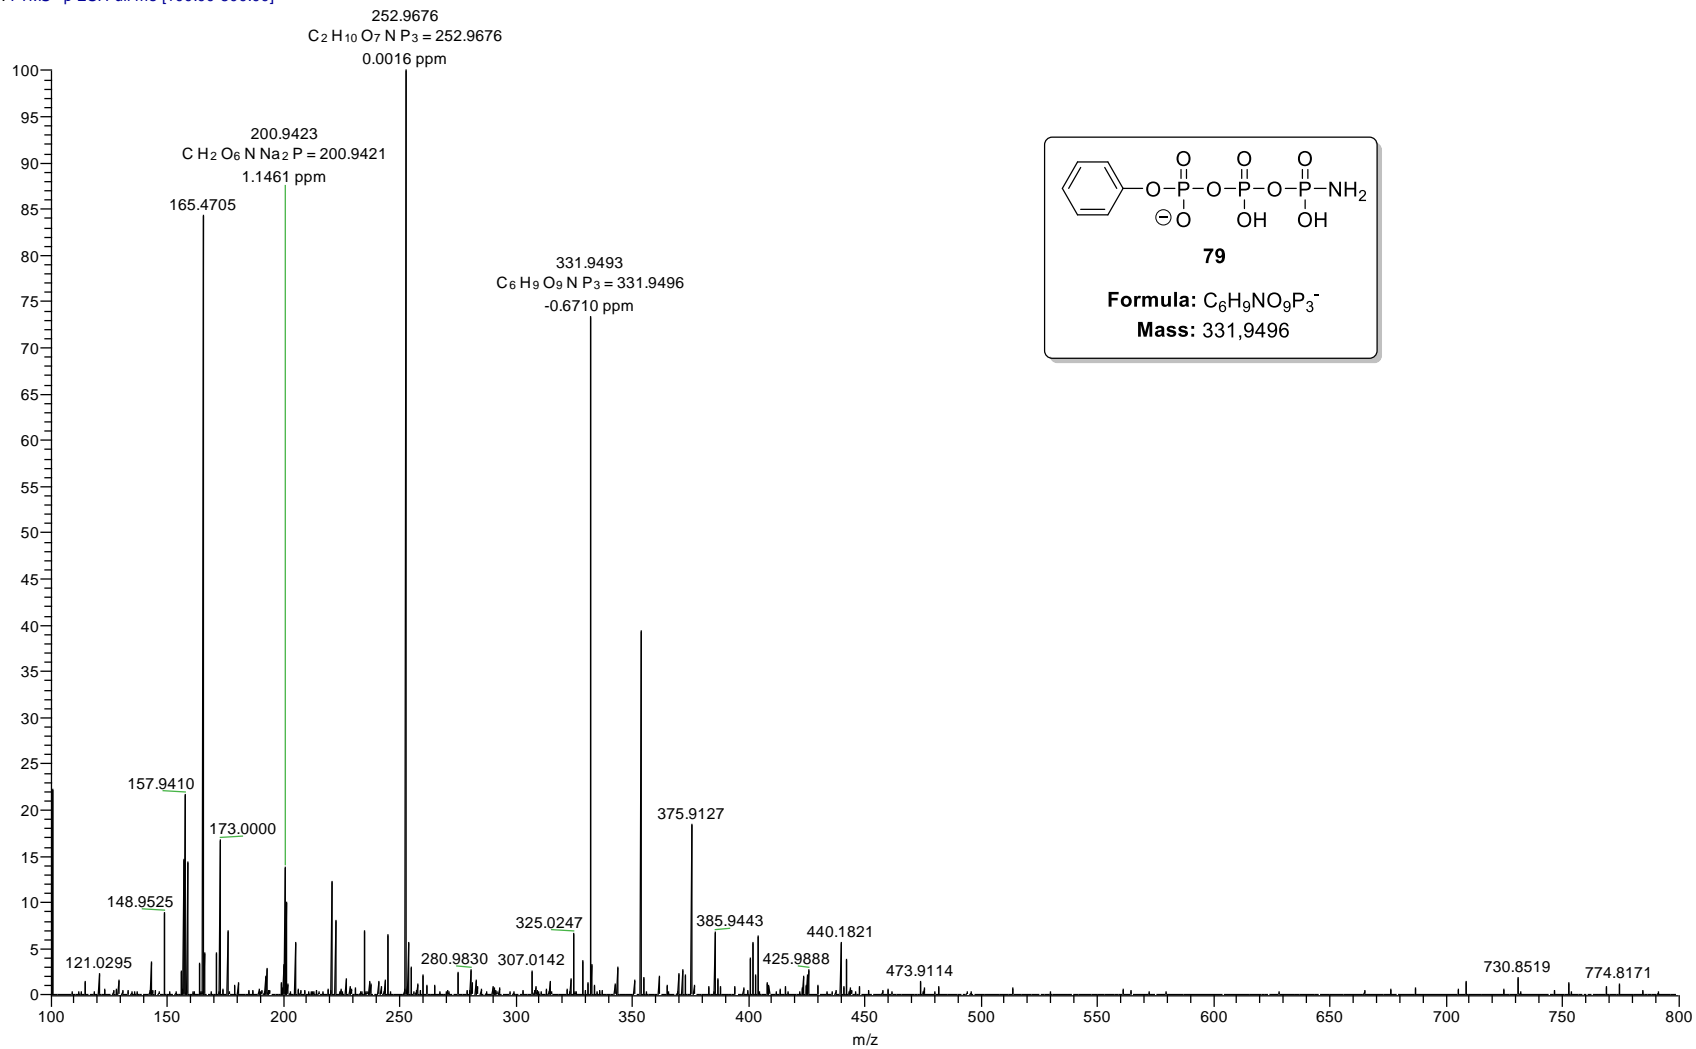

**HRMS (ESI) Analysis of compound 80: PhenylP<sub>3</sub>-anthracen-9-ylmethanamidate**

hsjec26shr2 #1 RT: 0.06 AV: 1 NL: 4.20E7  
T: FTMS - p ESI Full ms [100.00-700.00]

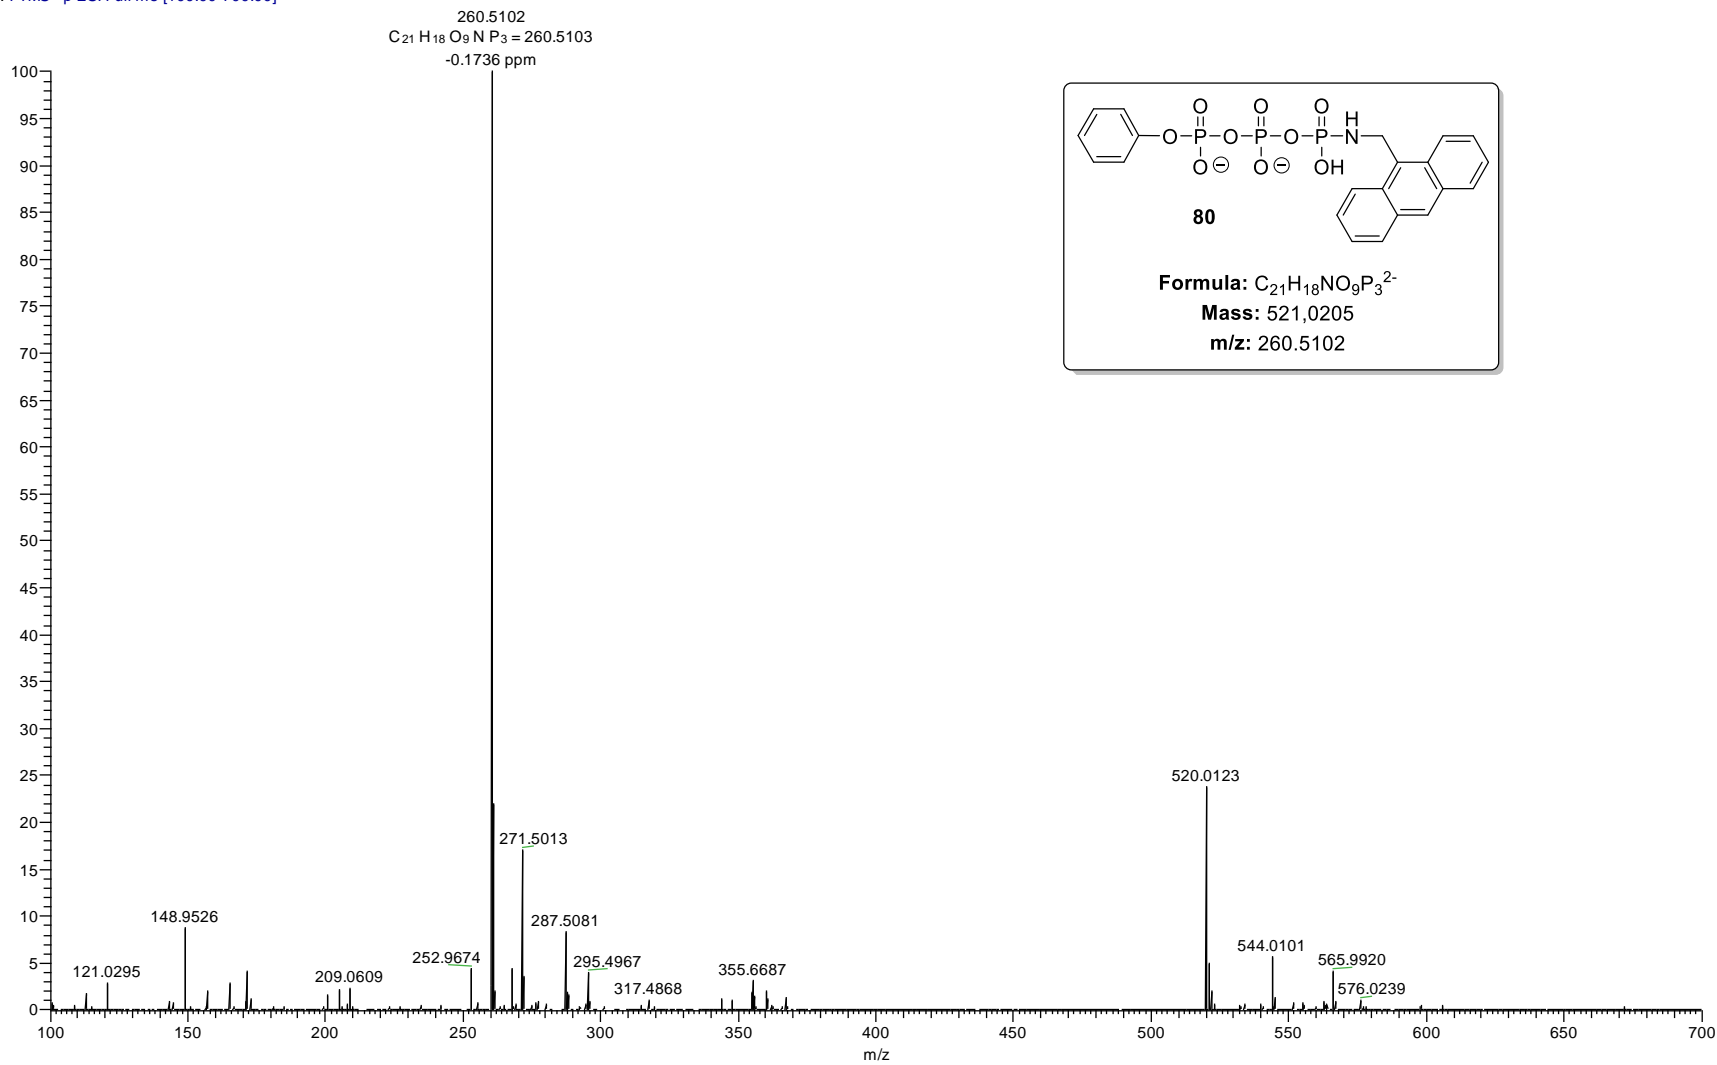

**HRMS (ESI) Analysis of compound 81: PhenylP<sub>3</sub>-5'-deoxyadenosyl-5'-amidate**

hsjec34shr1 #1 RT: 0.02 AV: 1 NL: 4.04E6  
T: FTMS - p ESI Full lock ms [100.00-1200.00]

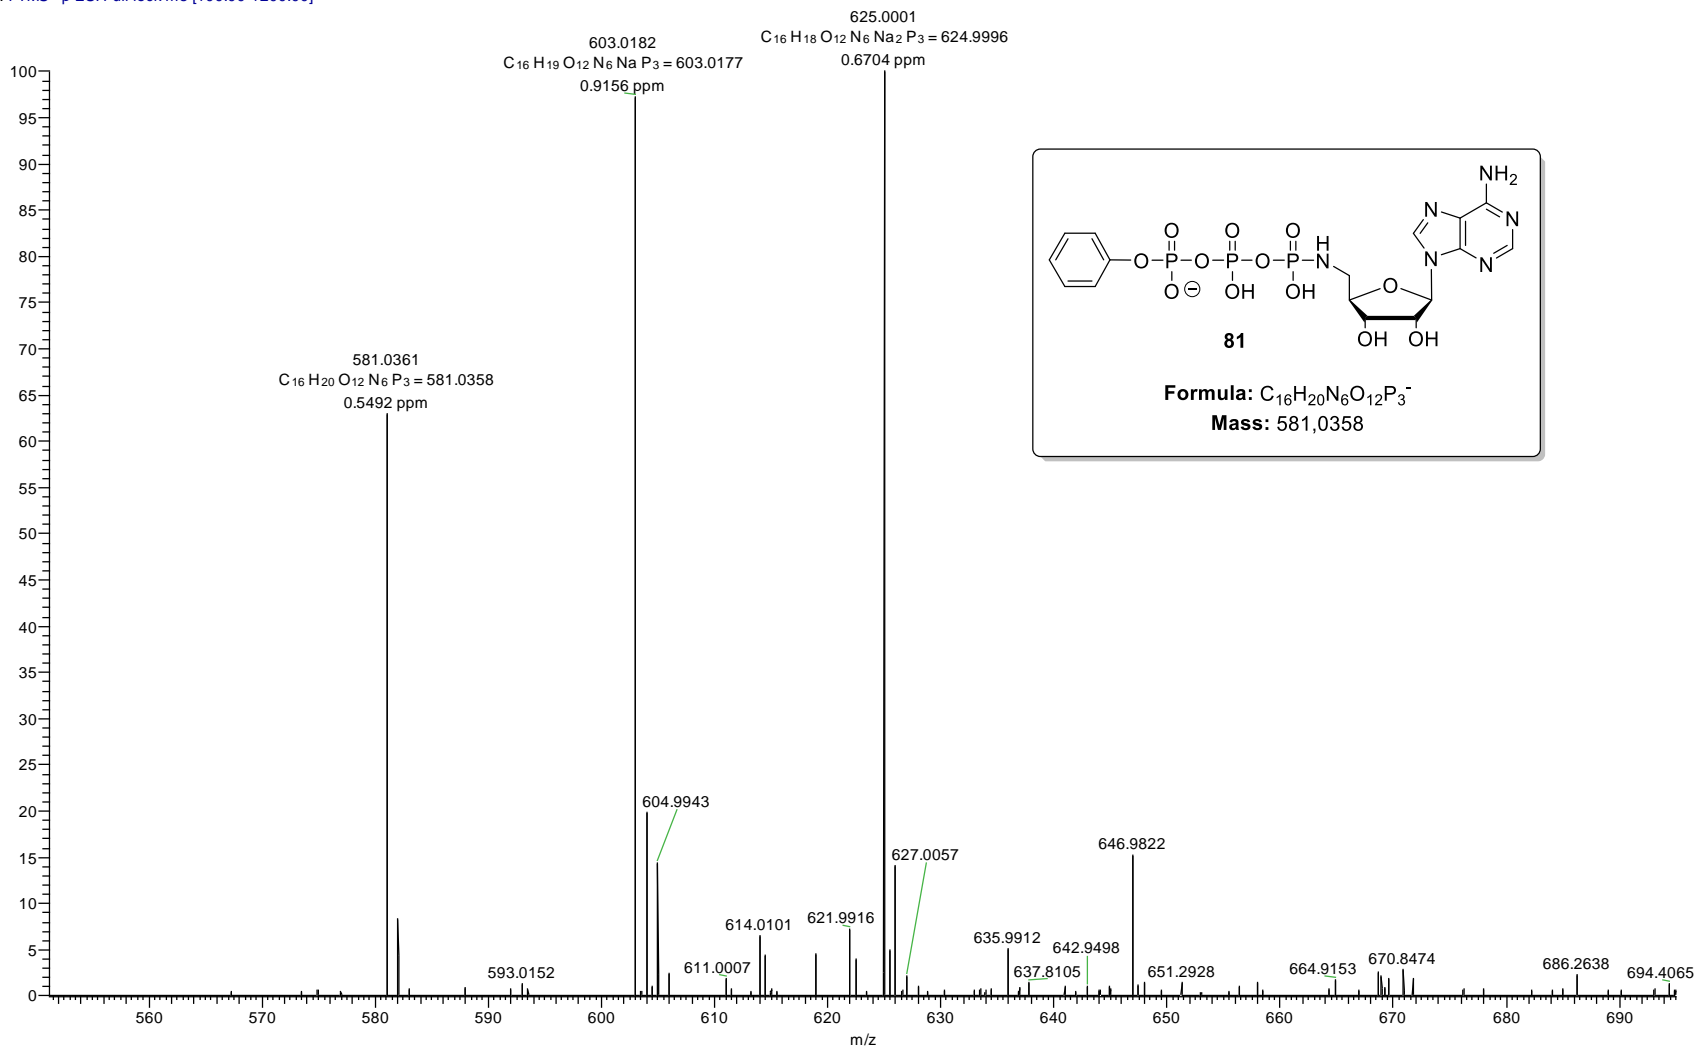



## HRMS (ESI) Analysis of compound 82: PhenylP<sub>3</sub>-5'-deoxyguanosyl-5'-amidate

hsjec30shr1 #1 RT: 0.02 AV: 1 NL: 1.63E6  
T: FTMS - p ESI Full lock ms [100.00-1300.00]

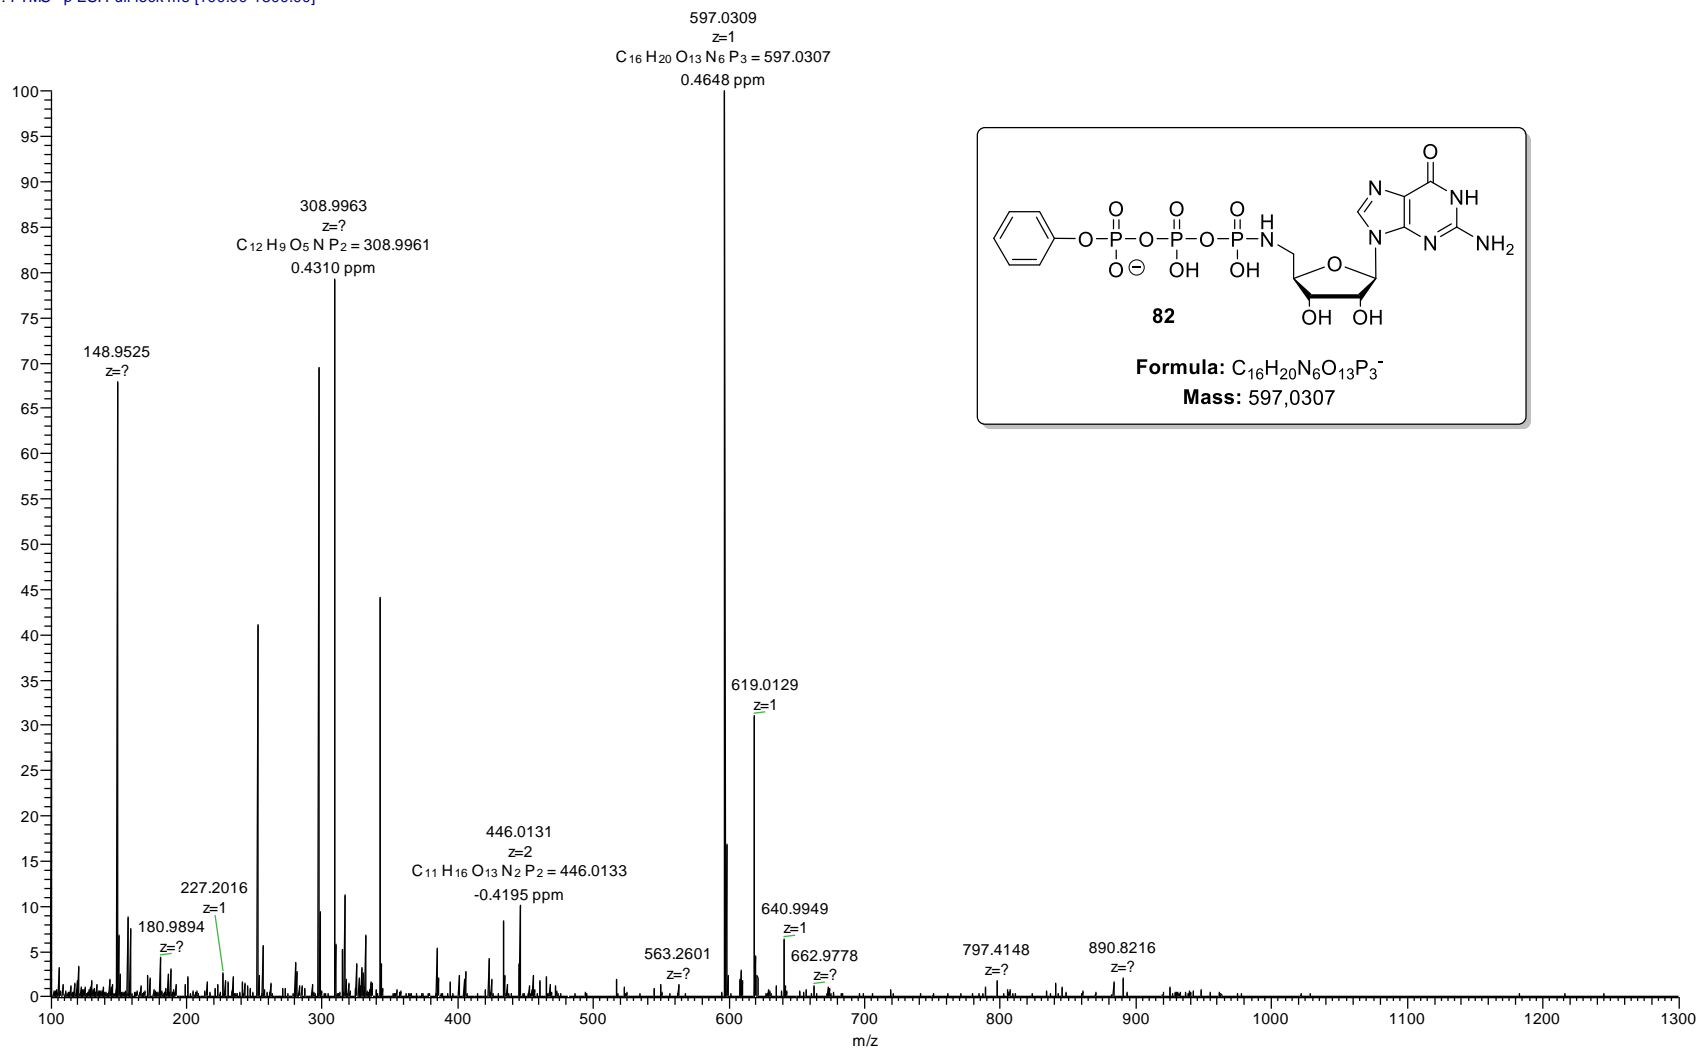

### HRMS (ESI) Analysis of compound 83: Napht-2-ylP<sub>3</sub>-5'-deoxyguanosyl-5'-amidate

hsjec36shr2 #1 RT: 0.02 AV: 1 NL: 2.39E7  
T: FTMS - p ESI Full lock ms [100.00-1200.00]

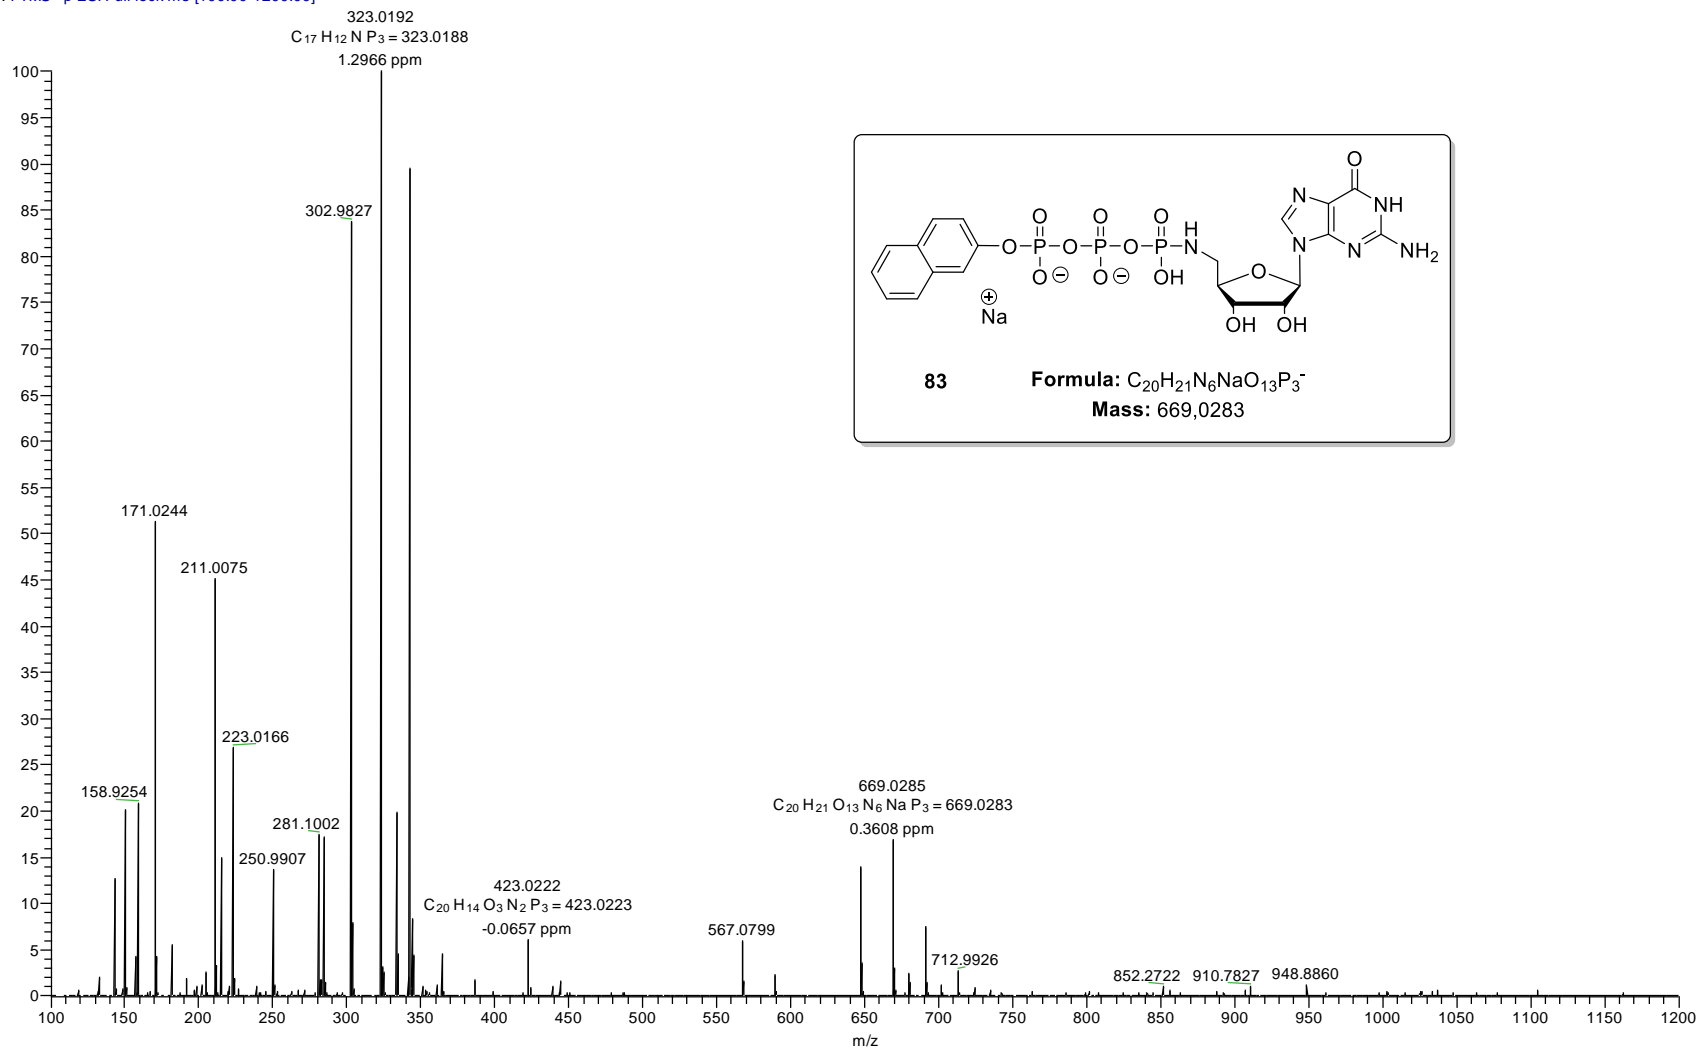

**HRMS (ESI) Analysis of compound 84: Pyren-2-ylP<sub>3</sub>-5'-deoxyadenosyl-5'-amidate**

hsjec43shr3 #1 RT: 0.02 AV: 1 NL: 1.76E7  
T: FTMS - p ESI Full lock ms [100.00-1000.00]

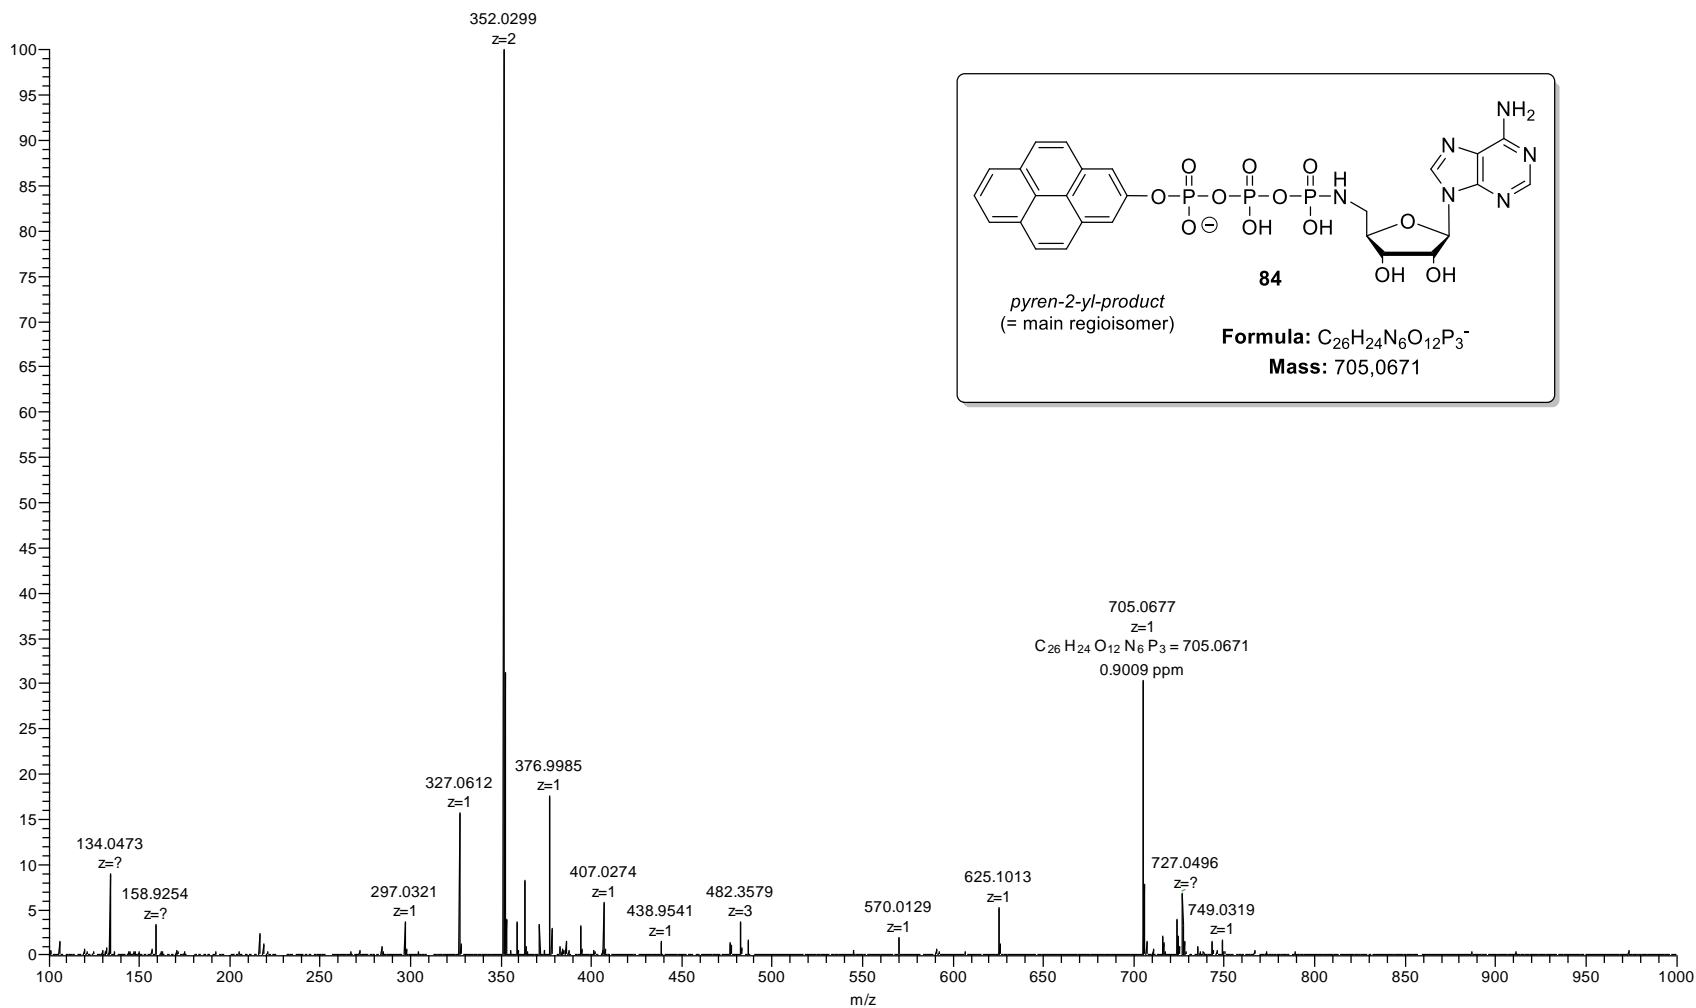

**HRMS (ESI) Analysis of compound 85: Benzo[1,3]dioxol-5-ylP<sub>3</sub>-((7-(diethylamino)-2-oxo-2H-chromen-4-yl) methylamidate**

hsjec31shr2 #1 RT: 0.02 AV: 1 NL: 1.21E8  
T: FTMS - p ESI Full lock ms [100.00-1300.00]

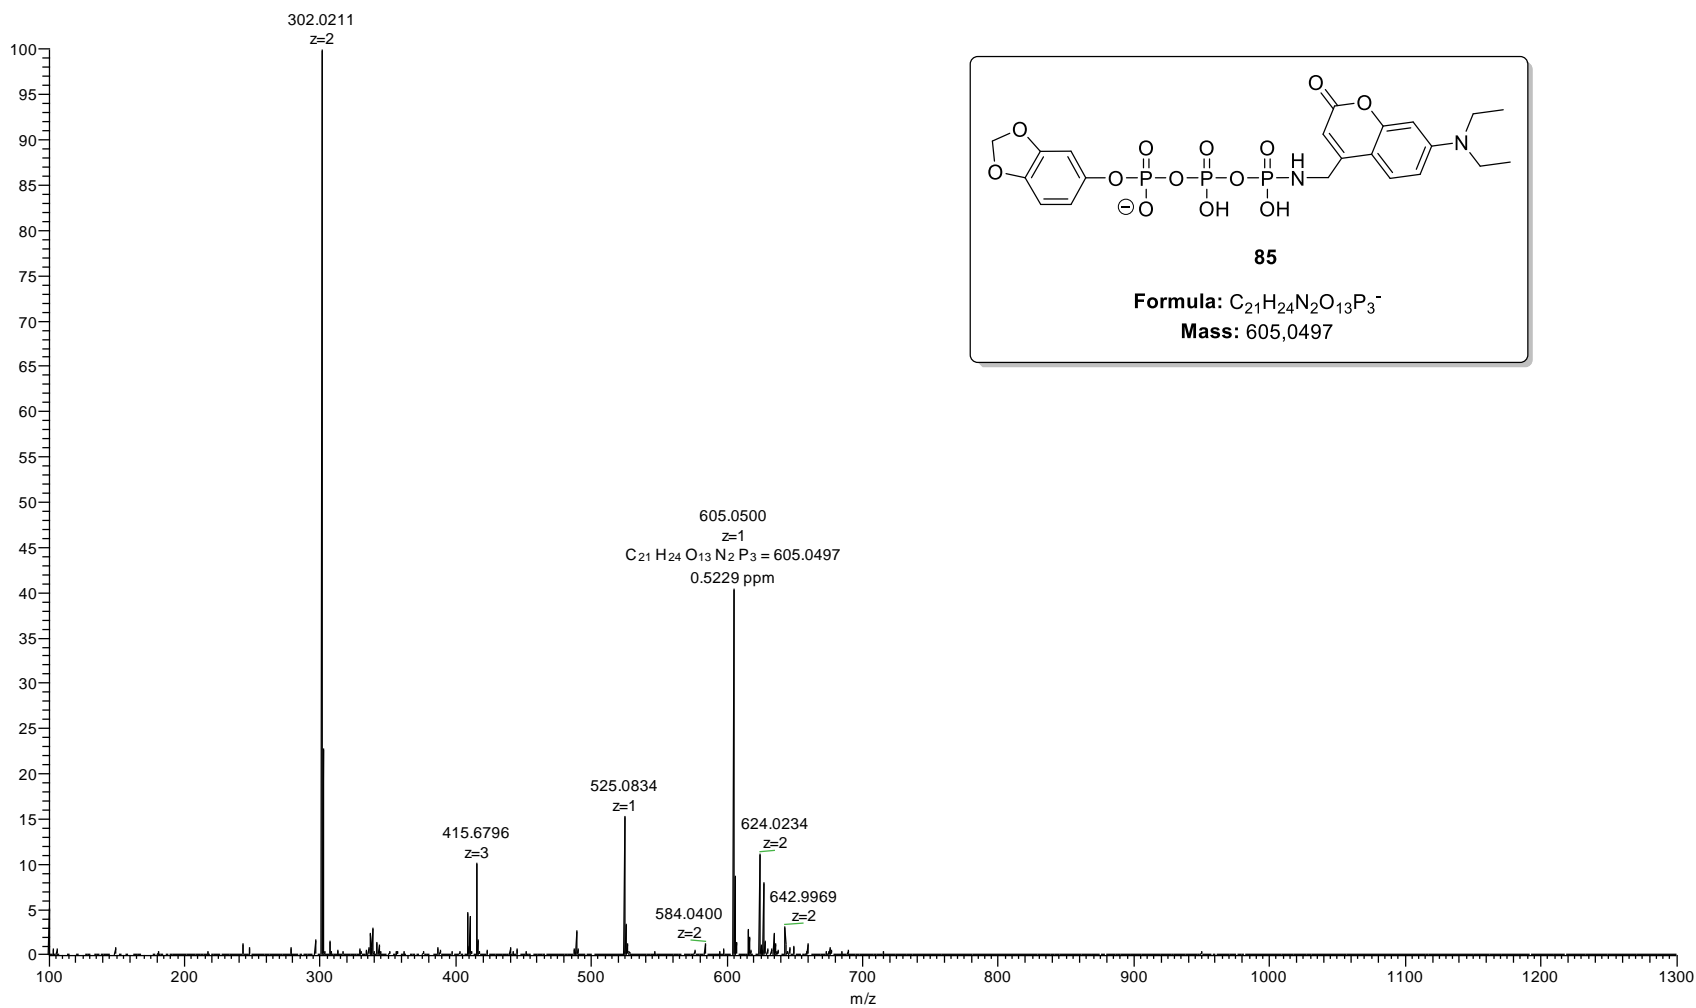

**HRMS (ESI) Analysis of compound 86: PhenylP<sub>4</sub>-propargylamidate**

hsjec05shr1 #1 RT: 0.02 AV: 1 NL: 2.57E7  
T: FTMS - p ESI Full lock ms [100.00-900.00]

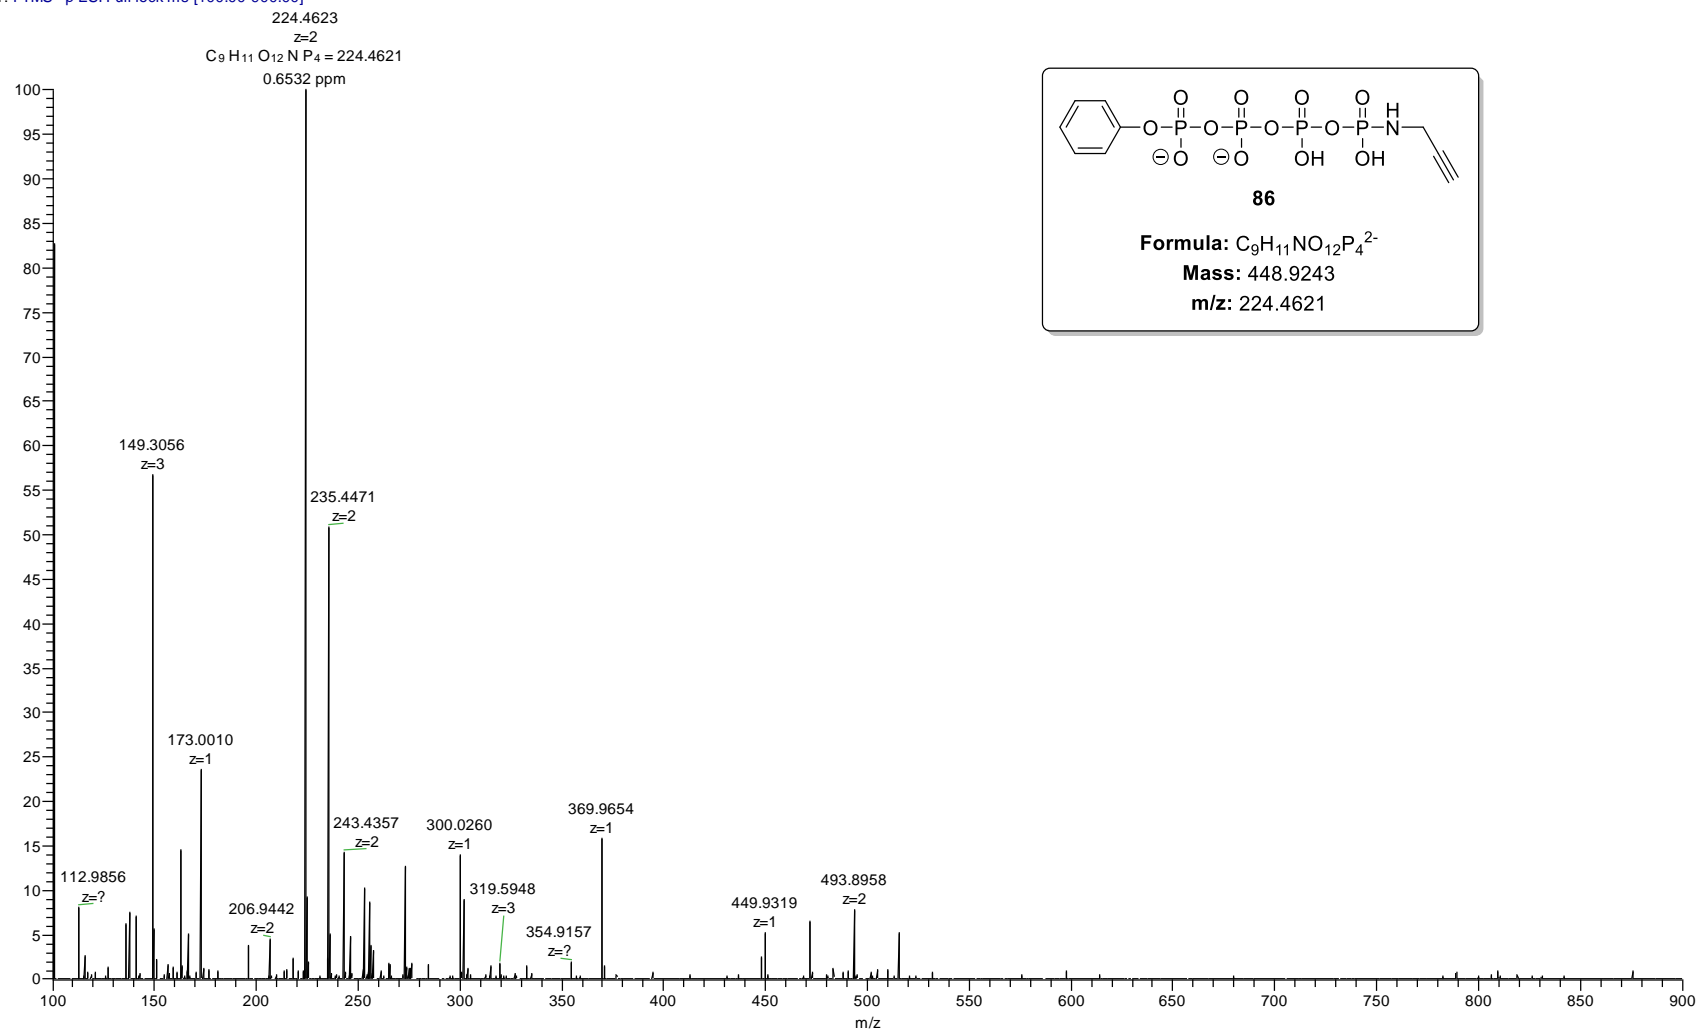

**HRMS (ESI) Analysis of compound 87: Pyren-2-ylP<sub>4</sub>-5'-deoxyguanosyl-5'-amidate**

hsjec23shr3 #1 RT: 0.02 AV: 1 NL: 3.95E7

T: FTMS - p ESI Full lock ms [100.00-1200.00]

266.3379

z=3

C<sub>26</sub>H<sub>23</sub>O<sub>16</sub>N<sub>6</sub>P<sub>4</sub> = 266.3379

0.0237 ppm

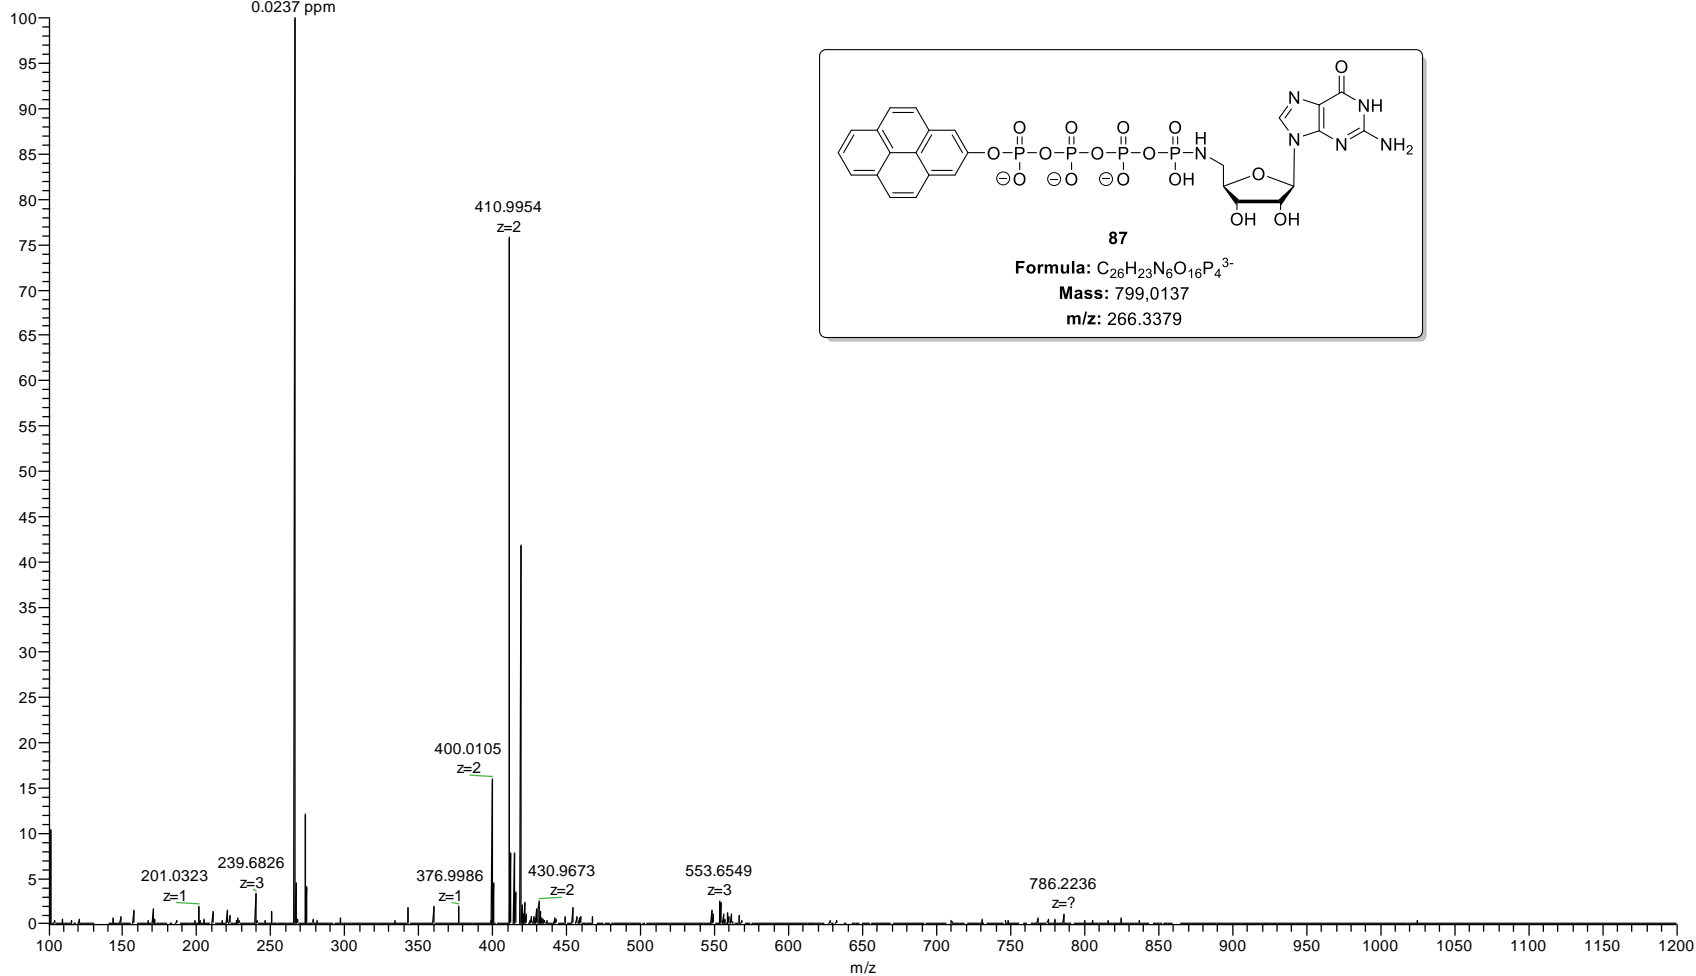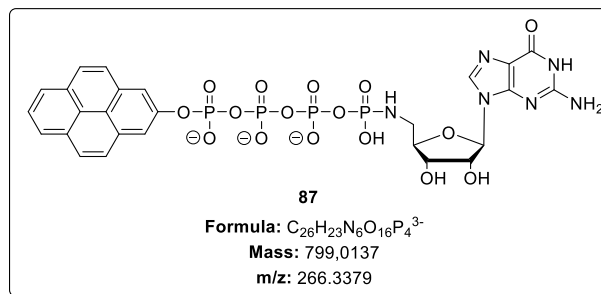

**HRMS (ESI) Analysis of compound 88: PhenylP<sub>4</sub>-5'-deoxyguanosyl-5'-amidate**

hsjec32shr4 #1 RT: 0.02 AV: 1 NL: 2.14E7  
T: FTMS - p ESI Full lock ms [80.00-1000.00]

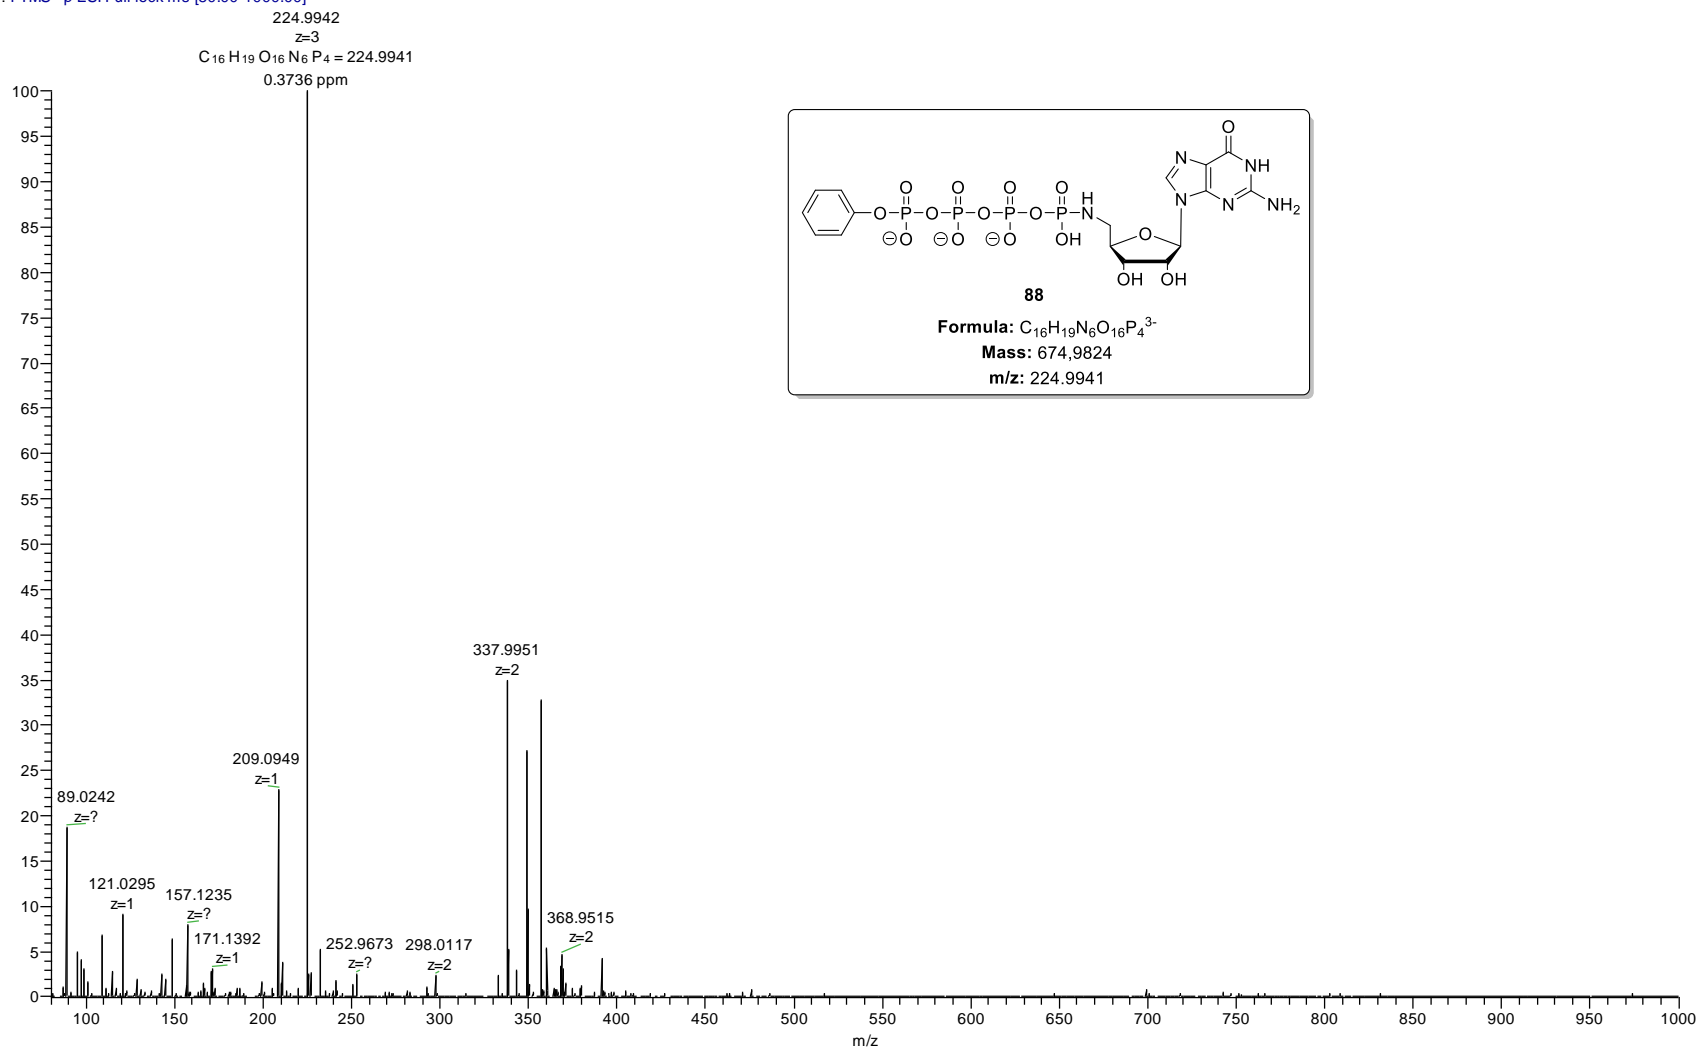

**HRMS (ESI) Analysis of compound 89: 3,4-DimethylphenylP<sub>4</sub>-(7-(diethylamino)-2-oxo-2H-chromen-4-yl) methylamidate**

hsjec35shr1 #1 RT: 0.02 AV: 1 NL: 2.11E7  
T: FTMS - p ESI Full ms [100.00-1200.00]

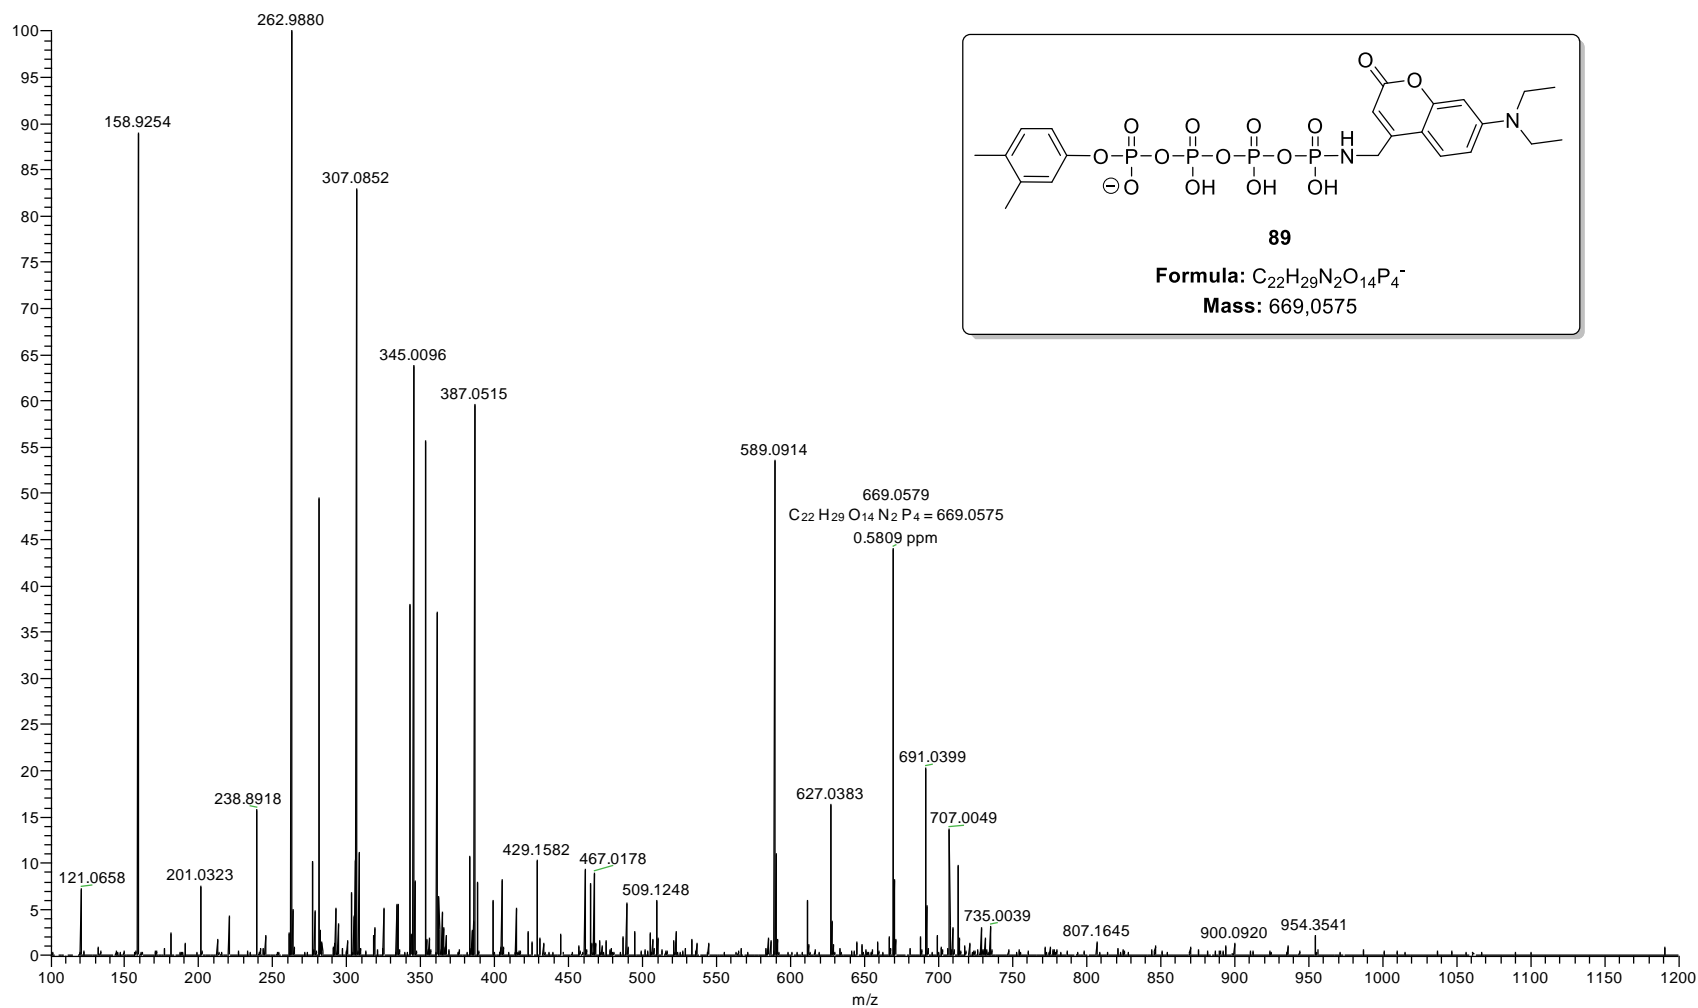



**HRMS (ESI) Analysis of compound 90: PhenylP<sub>5</sub>-propargylamidate**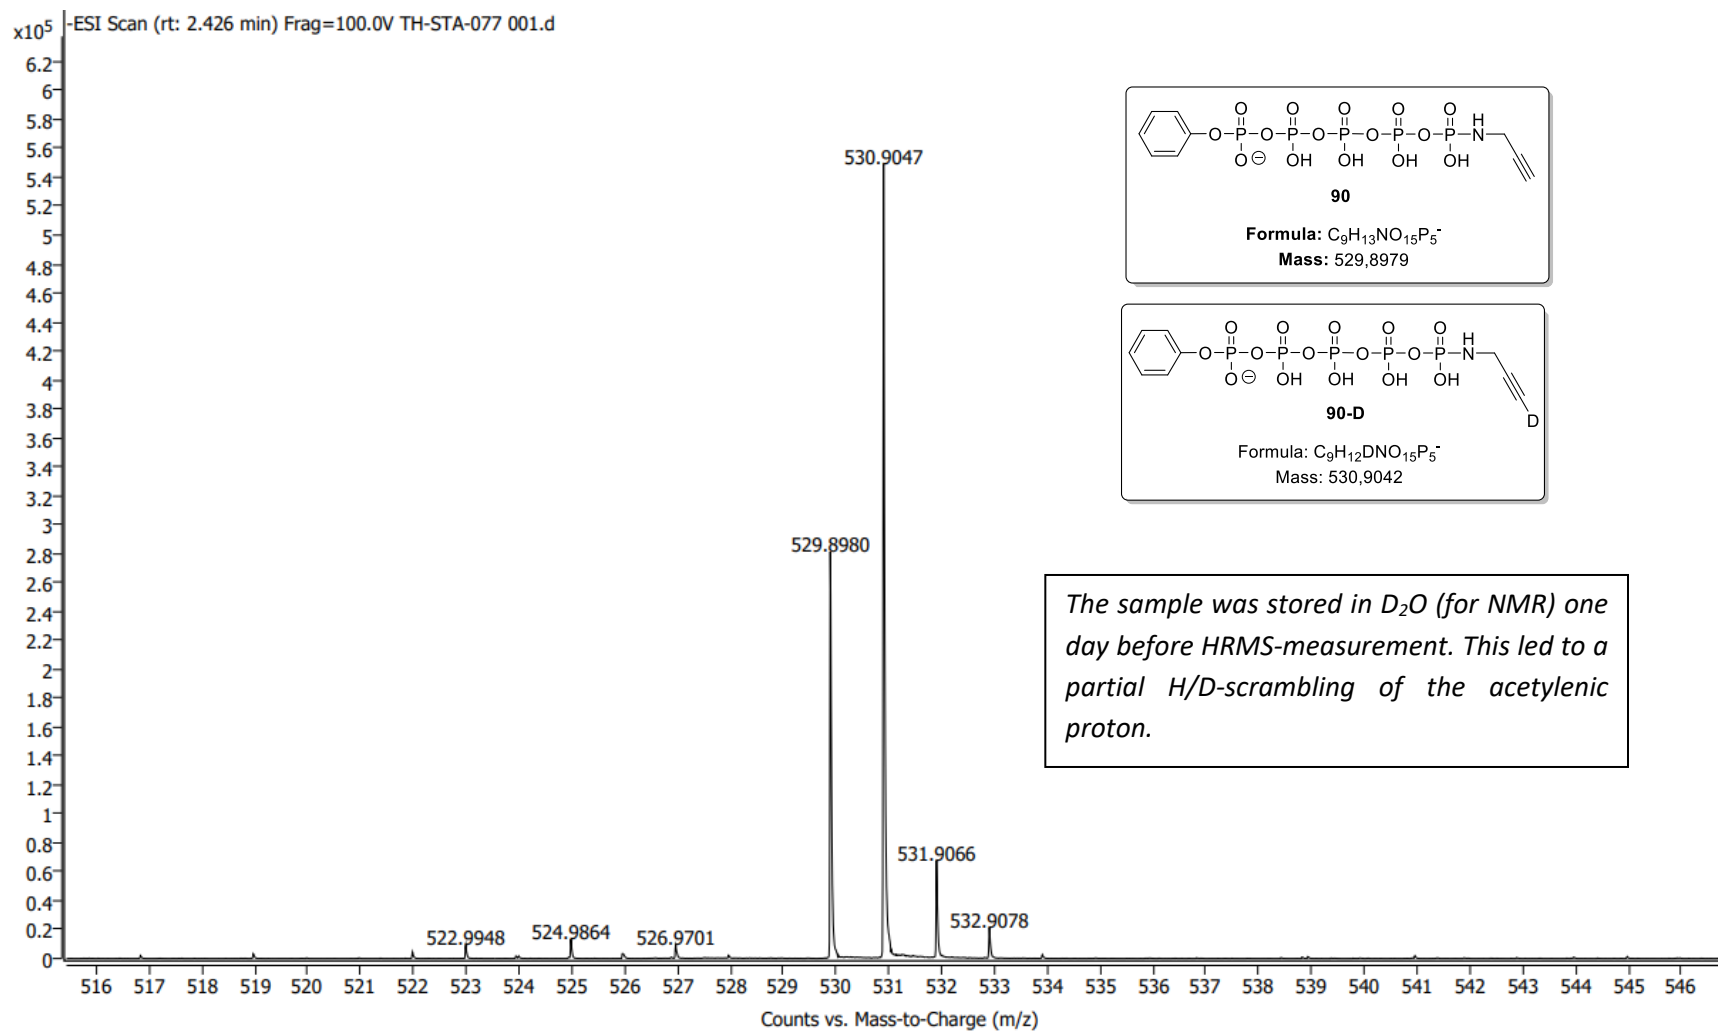

**HRMS (ESI) Analysis of compound 91: PhenylP<sub>7</sub>-propargylamidate**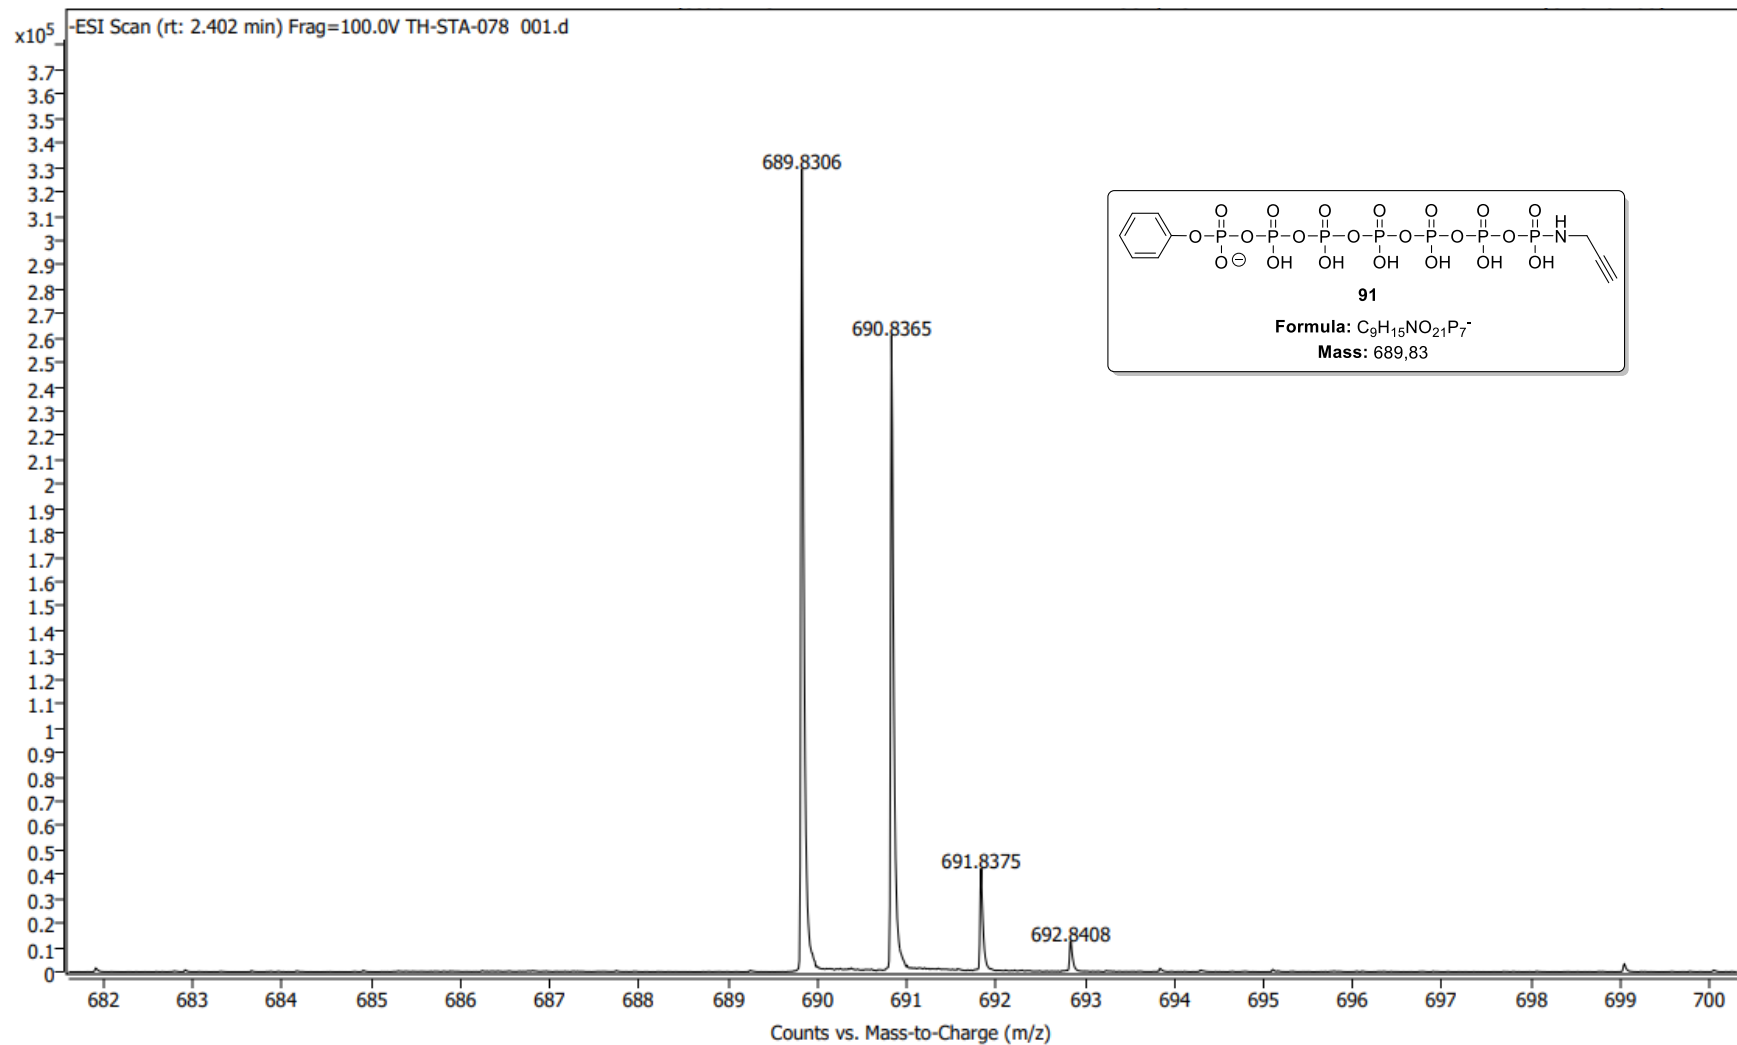

**HRMS (ESI) Analysis of compound 92: PhenylP<sub>8</sub>-propargylamidate**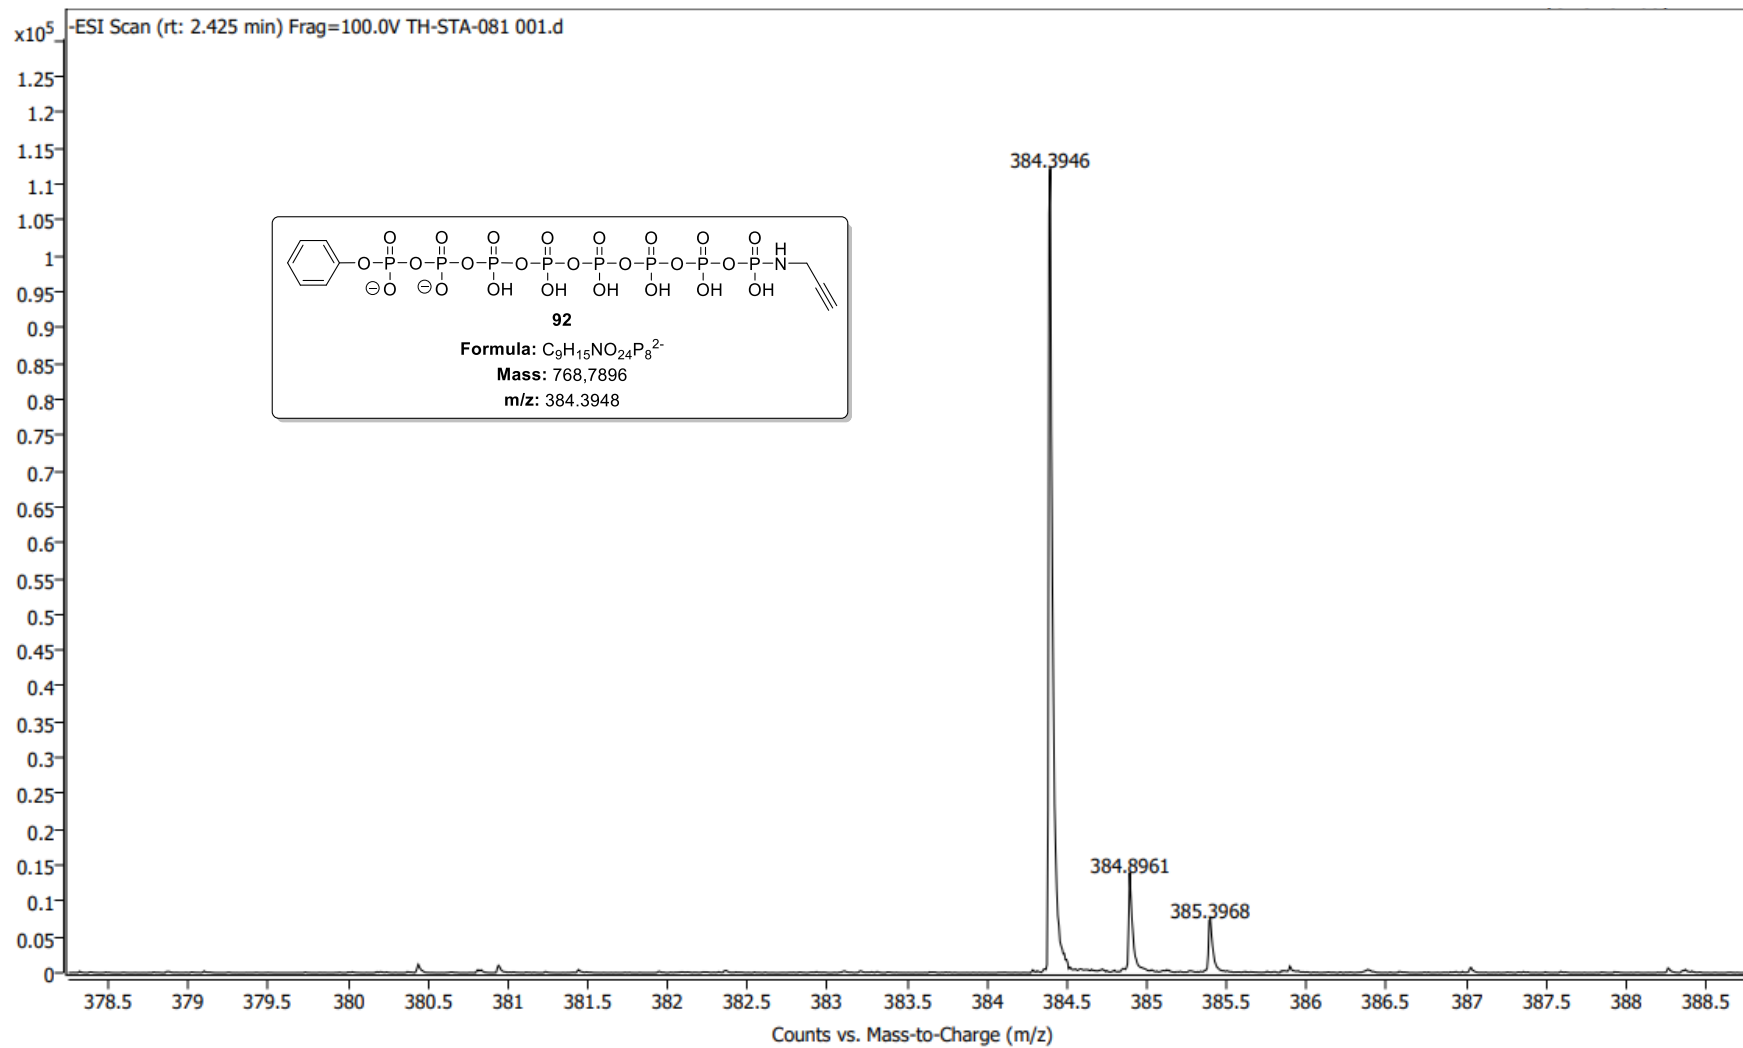

**HRMS (ESI) Analysis of compound SI-5: D4T - monophosphate**

hsjec12shr5 #1 RT: 0.02 AV: 1 NL: 4.55E7  
T: FTMS - p ESI Full ms [100.00-800.00]

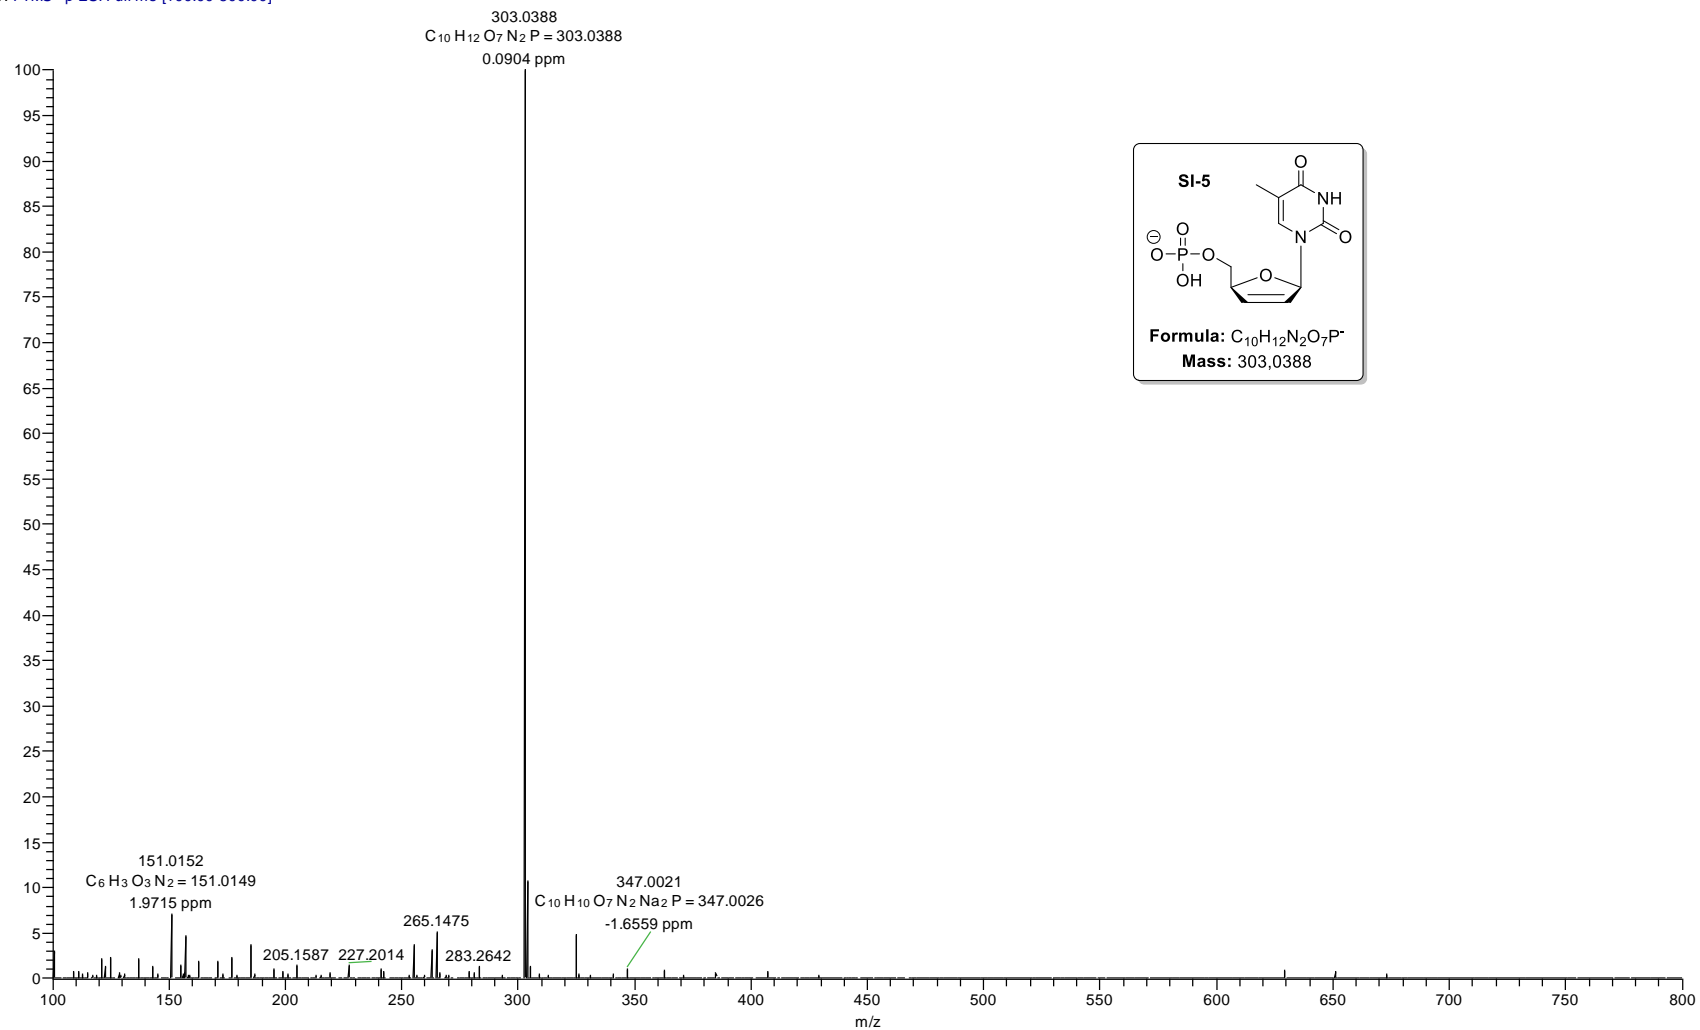

**HRMS (ESI) Analysis of compound SI-13: 6-Hydroxyhexylphosphate**

hsjeb97shr1 #1 RT: 0.02 AV: 1 NL: 2.00E8  
T: FTMS - p ESI Full lock ms [100.00-600.00]

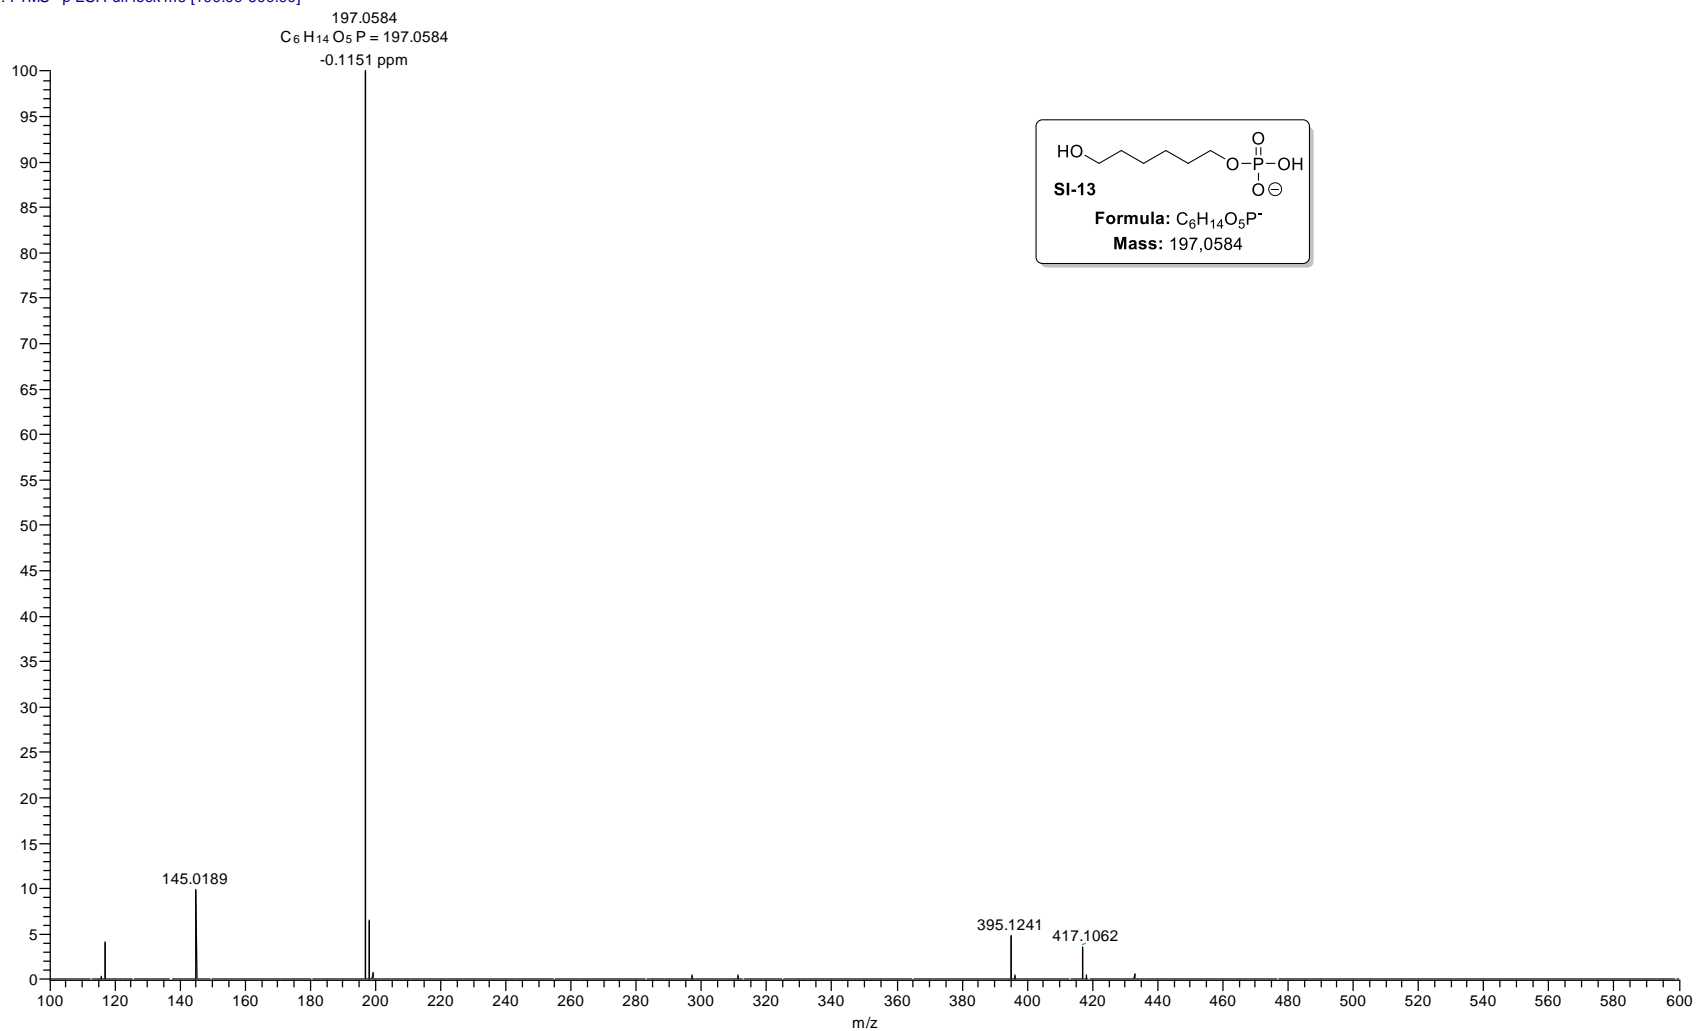

**HRMS (ESI) Analysis of compound SI-14: Geranylmonophosphate**

hsjec17shr2 #1 RT: 0.02 AV: 1 NL: 6.92E7  
T: FTMS - p ESI Full ms [100.00-600.00]

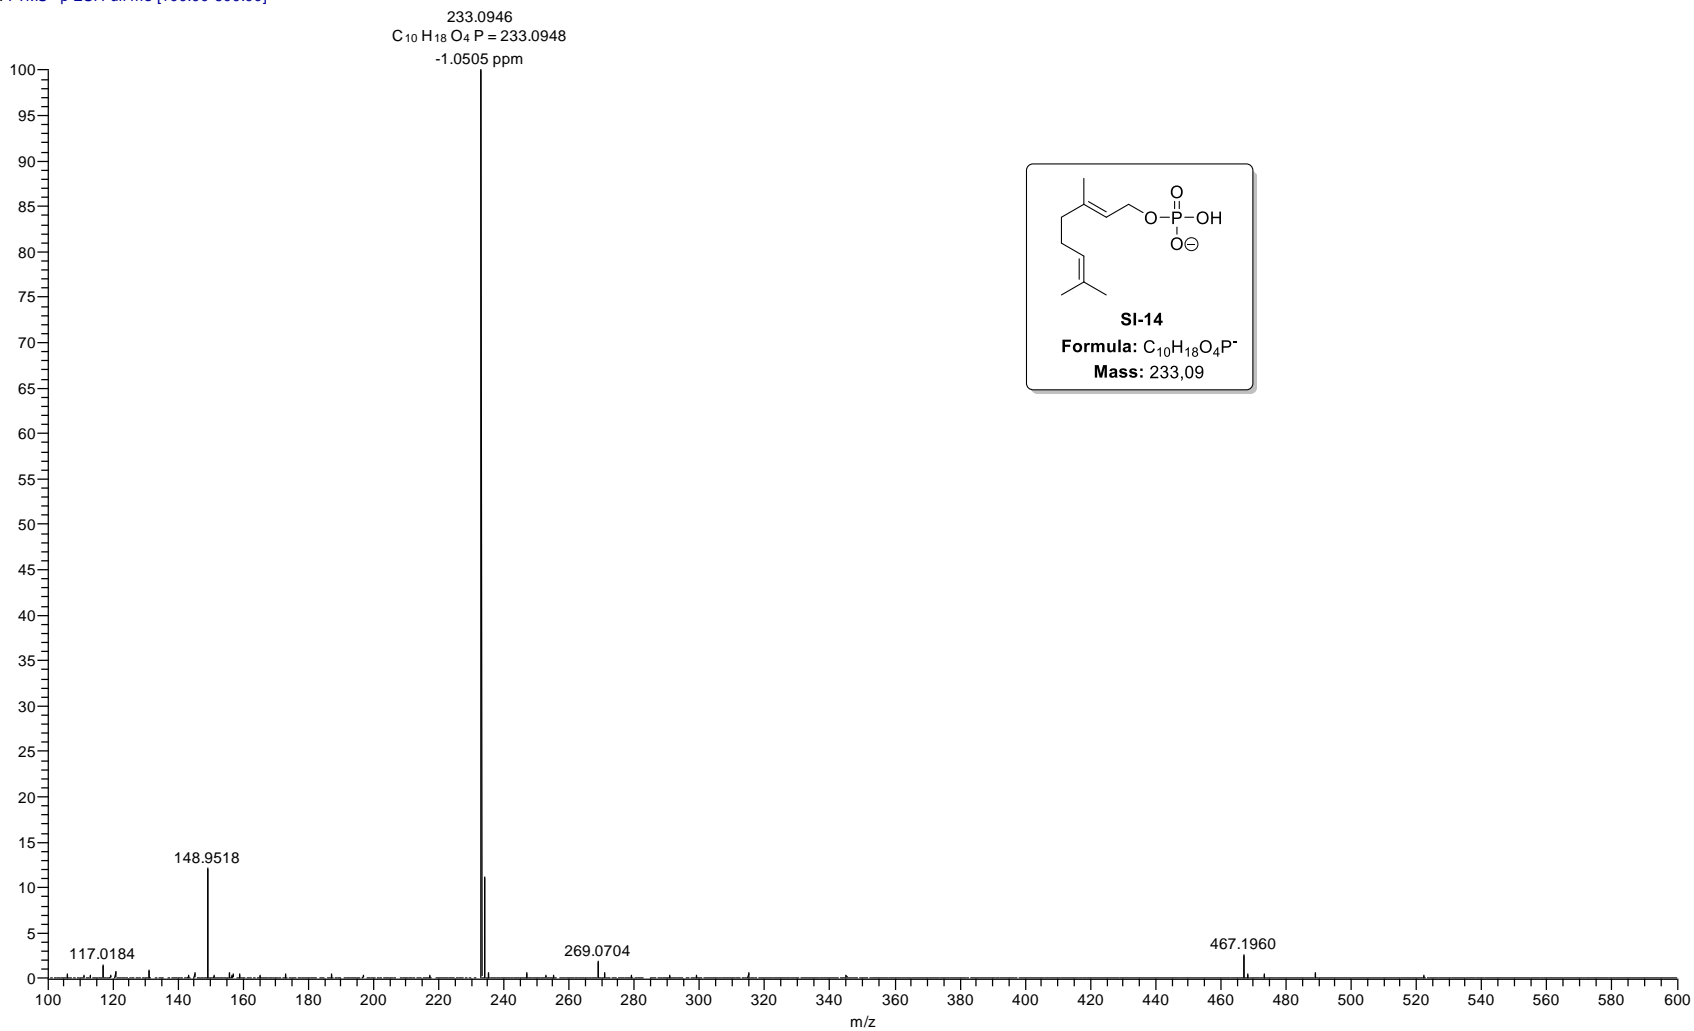

**HRMS (ESI) Analysis of compound SI-15: Isoprenylmonophosphate**

hsjec21shr2 #1 RT: 0.02 AV: 1 NL: 1.40E7  
T: FTMS - p ESI Full lock ms [70.00-400.00]

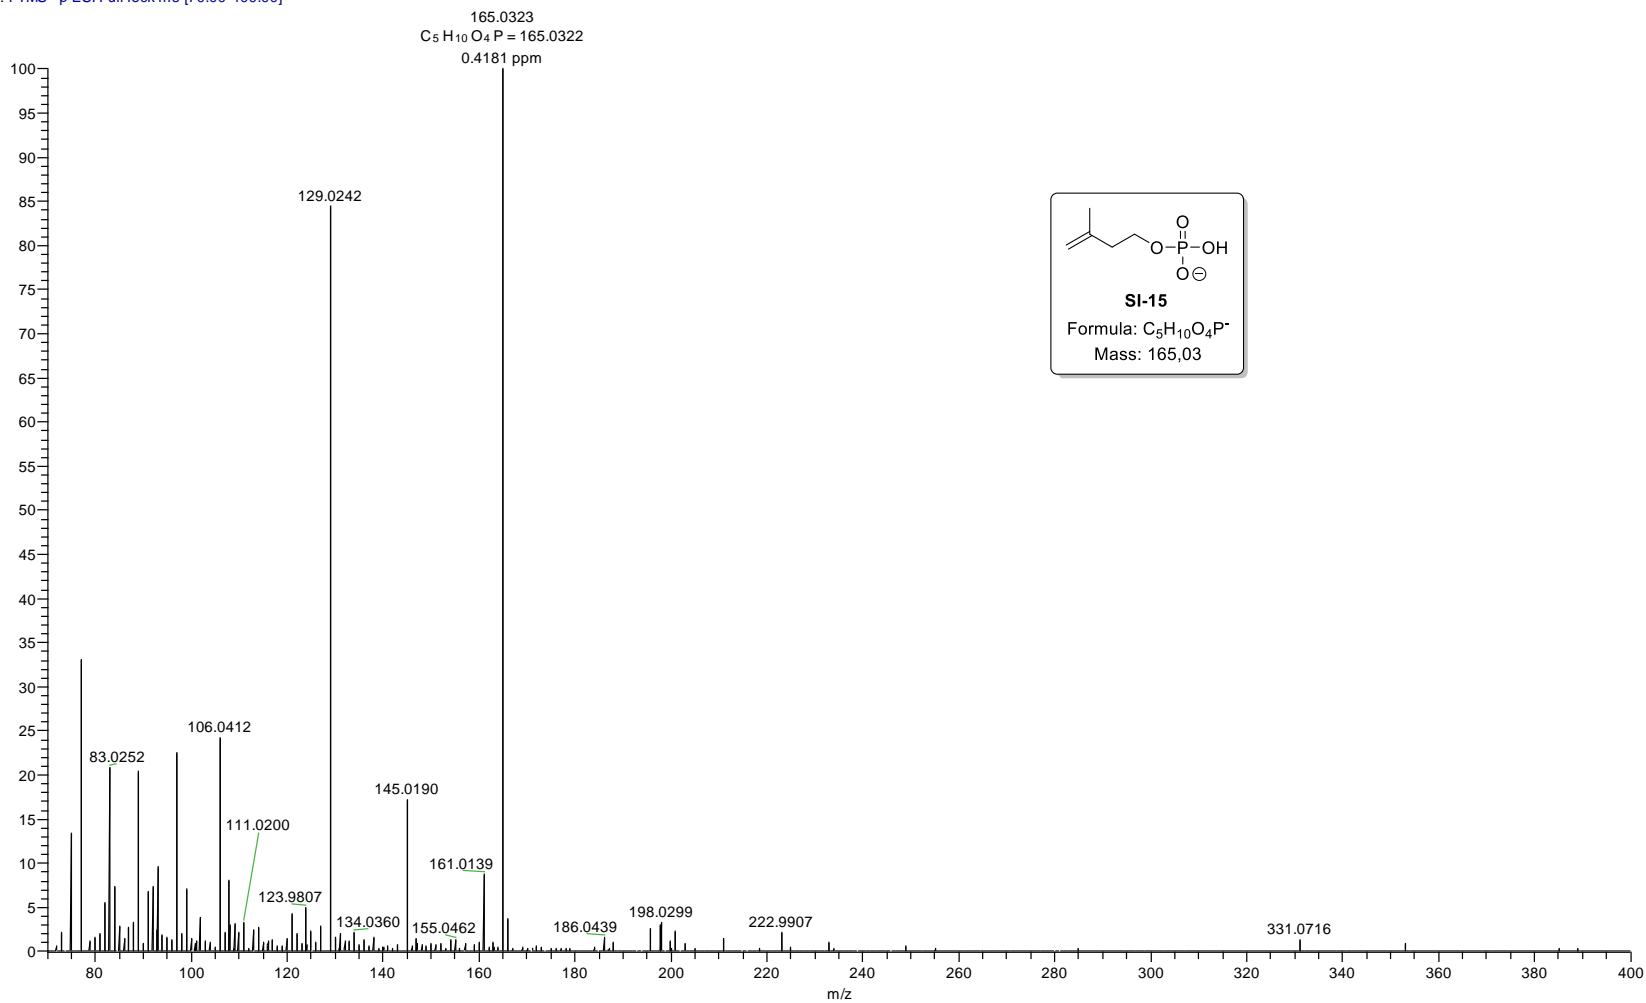

**HRMS (ESI) Analysis of compound SI-16: phenyldiphosphate**

hsjec28shr2 #1 RT: 0.02 AV: 1 NL: 7.33E7  
T: FTMS - p ESI Full lock ms [50.00-600.00]

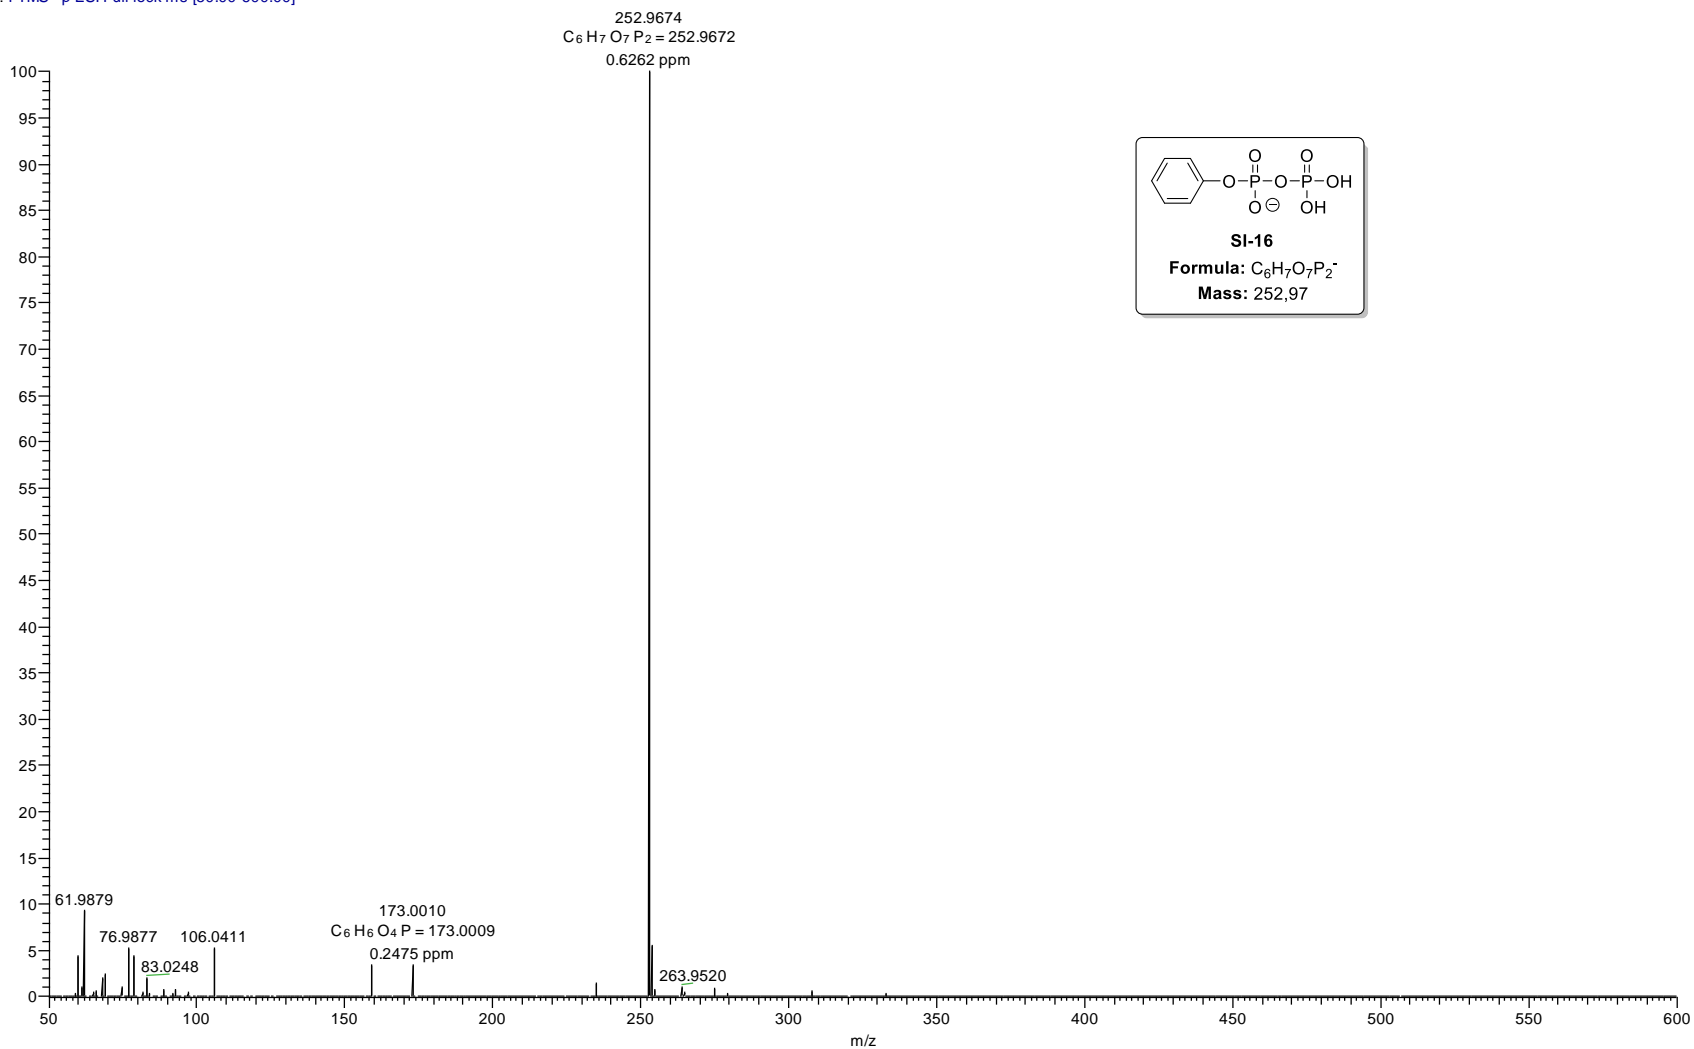



**HRMS (ESI) Analysis of compound SI-17: D4T - diphosphate**

hsjec40shr2#1 RT: 0.02 AV: 1 NL: 1.50E7  
T: FTMS - p ESI Full lock ms [100.00-800.00]

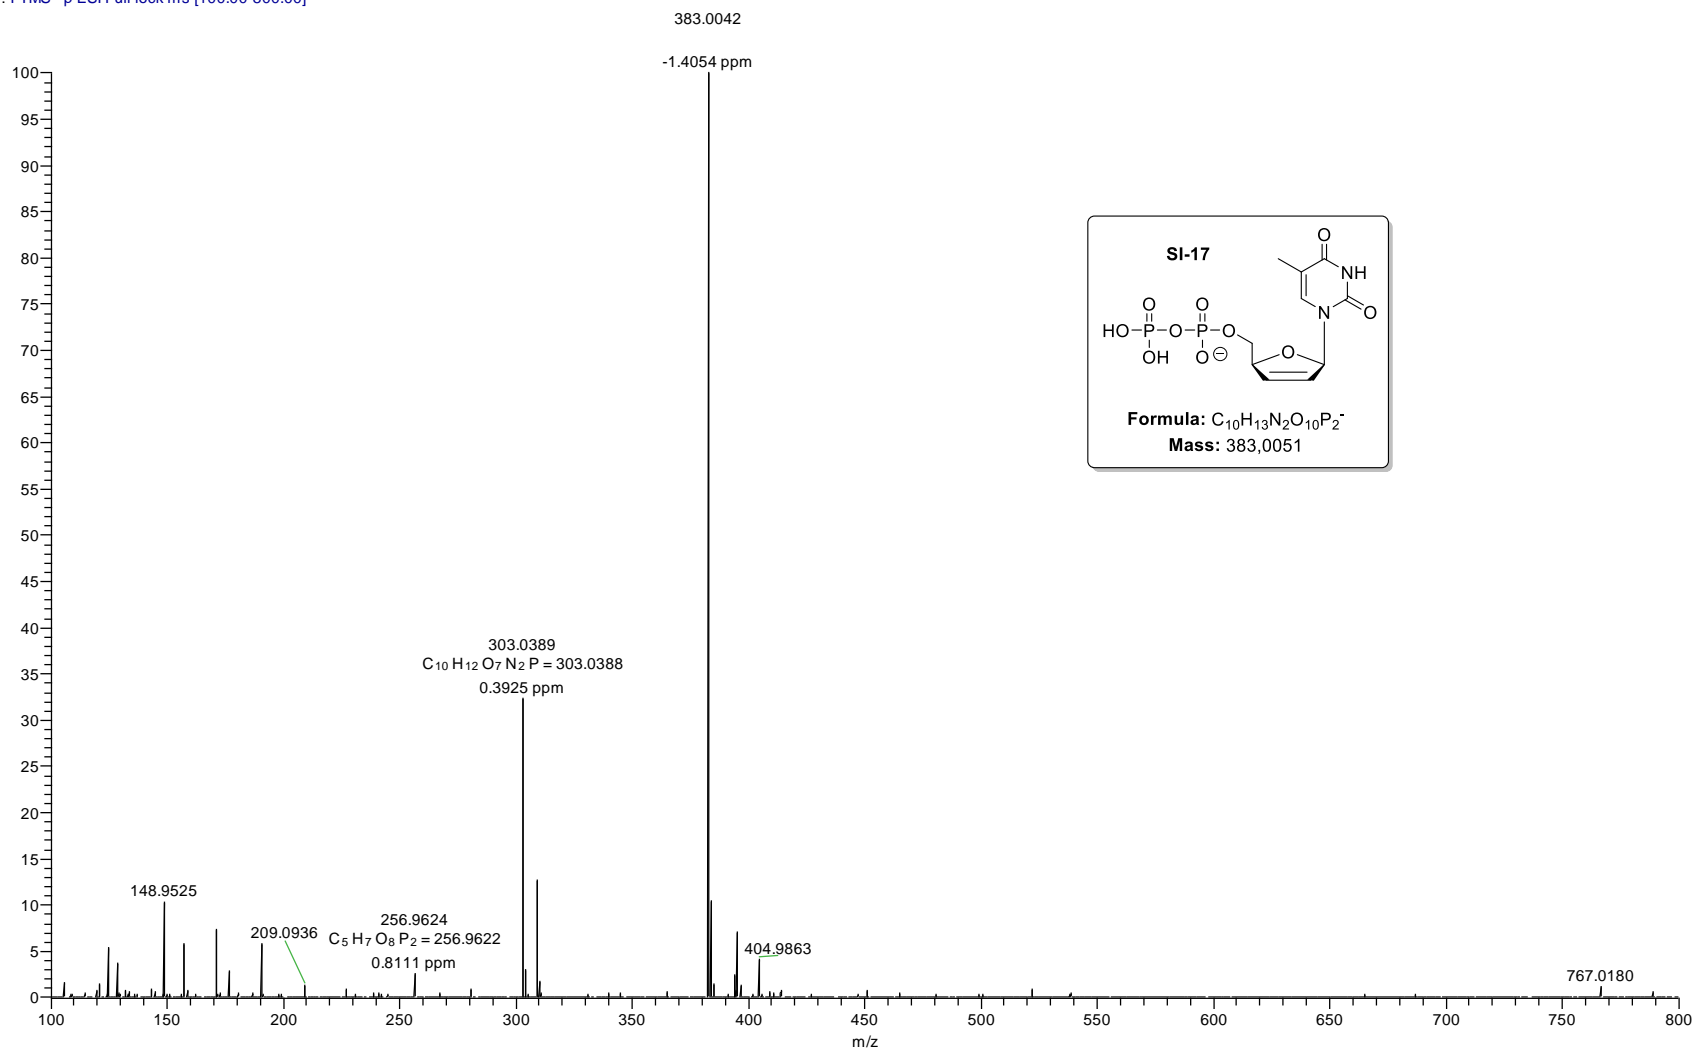

**HRMS (APCI) Analysis of compound SI-19: 2-(trimethylsilyl)pyren-1-yl trifluoromethanesulfonate**

wejea09thr7 #1 RT: 0.02 AV: 1 NL: 9.52E5  
T: FTMS - p APCI corona Full ms [150.00-800.00]

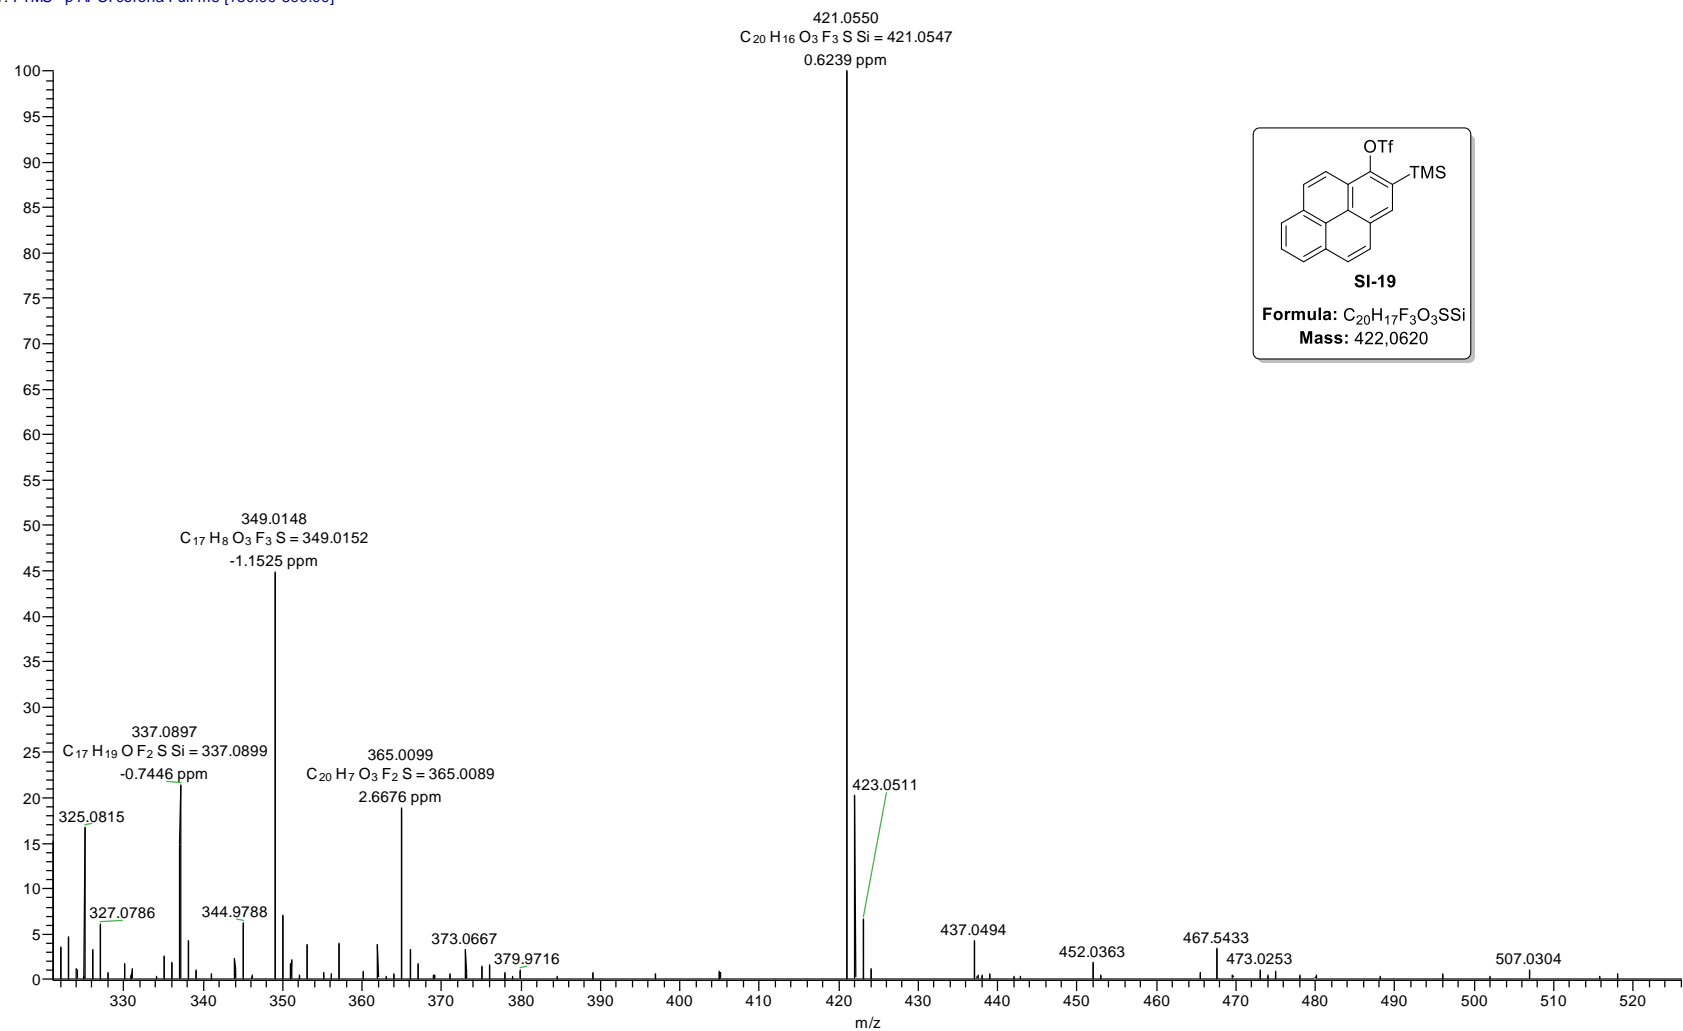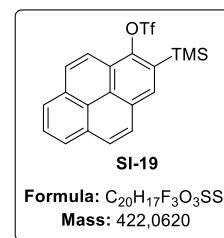

**HRMS (ESI) Analysis of compound SI-21: 4-(trimethylsilyl)ethynylphenyl isopropylcarbamate**

wistb74shr1 #1 RT: 0.02 AV: 1 NL: 5.93E6  
T: FTMS + p ESI Full lock ms [100.00-900.00]

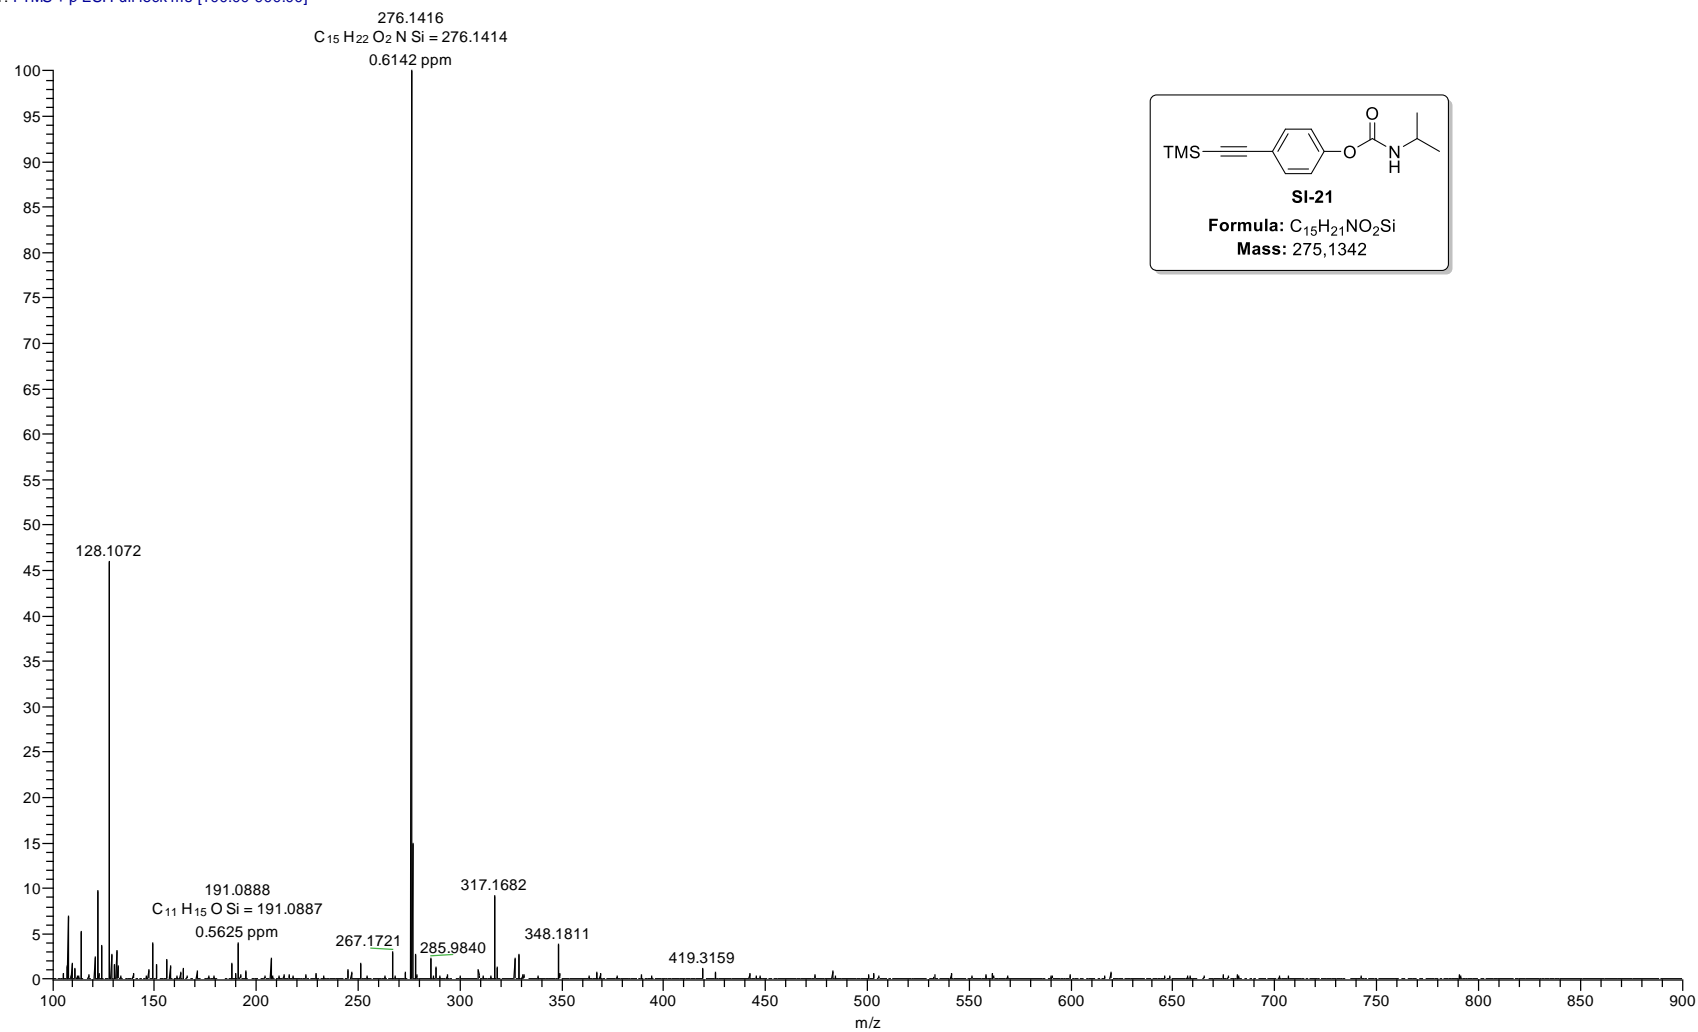

**HRMS (ESI) Analysis of compound SI-22: 2-(trimethylsilyl)-4-((trimethylsilyl)ethynyl)phenyl isopropylcarbamate**

wistb76shr1 #1 RT: 0.02 AV: 1 NL: 5.60E7  
T: FTMS + p ESI Full lock ms [100.00-900.00]

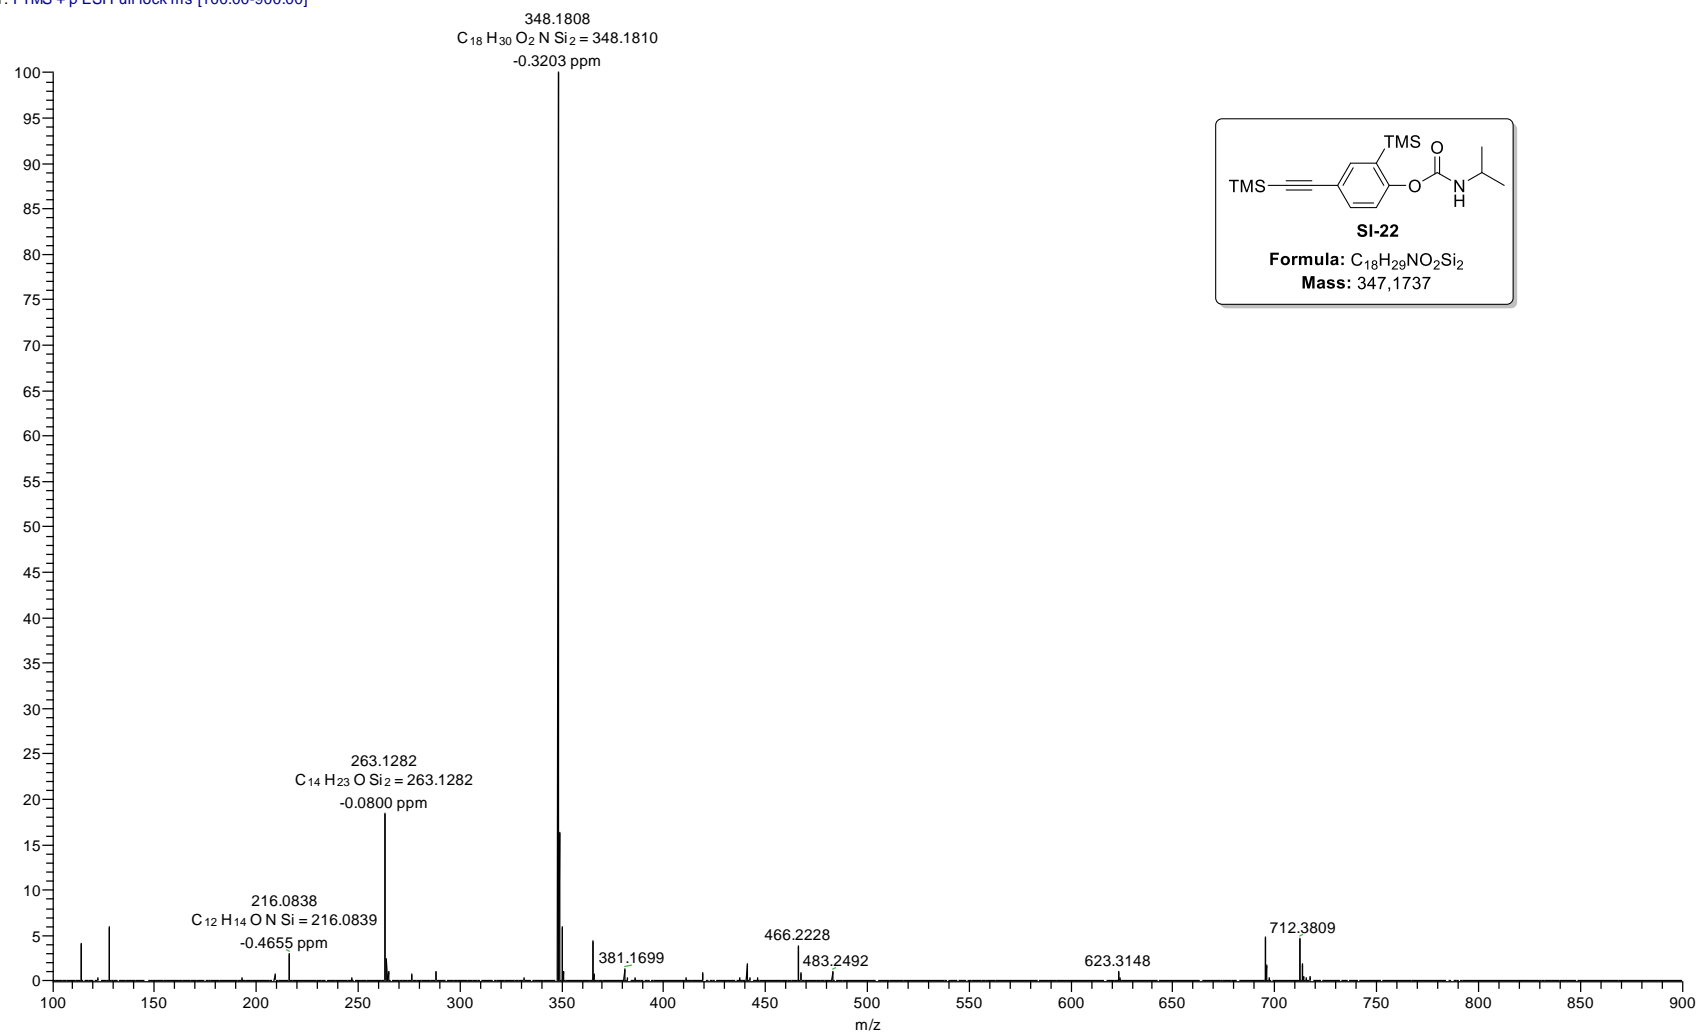

**HRMS (APCI) Analysis of compound SI-23: 2-(trimethylsilyl)-4-((trimethylsilyl)ethynyl)phenyl trifluoromethanesulfonate**

Analysis Report

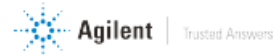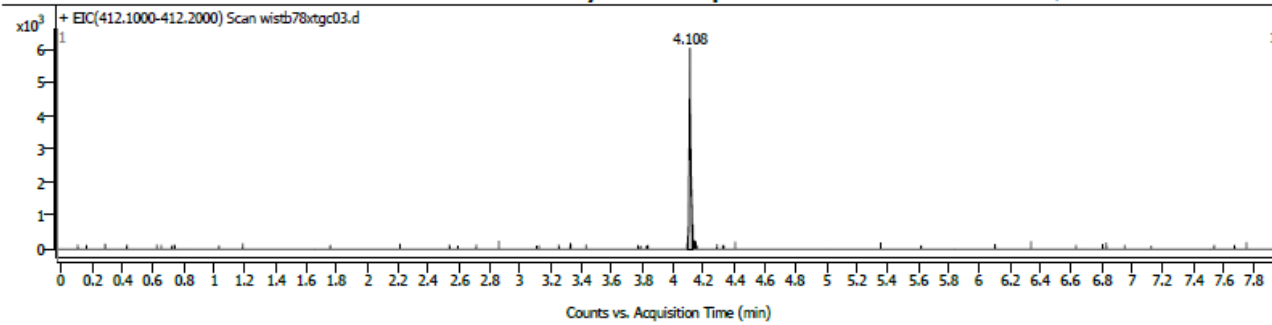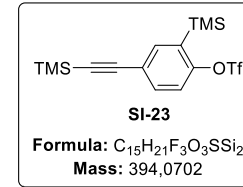

Chromatogram Peaks

| Peak | Start | RT    | End   | Height | Area | Area % | SNR |
|------|-------|-------|-------|--------|------|--------|-----|
| 1    | 4.092 | 4.108 | 4.125 | 6027   | 4360 | 100.00 |     |

Sample Spectra

+ Scan (rt: 3.984-4.319 min) Sub (2)

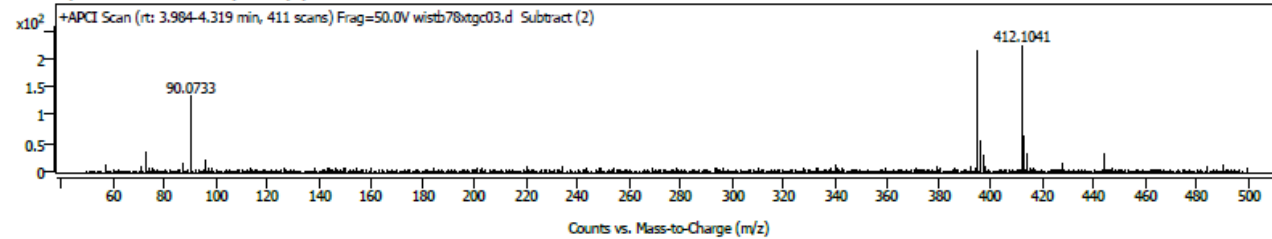

Spectrum Peaks

| m/z      | Z | Abund | Abund % | m/z (Calc) | Diff (ppm) | Ion Species                       | Formula                                                                      | Ion Type |
|----------|---|-------|---------|------------|------------|-----------------------------------|------------------------------------------------------------------------------|----------|
| 395.0775 | 1 | 213   | 95.44   | 395.0775   | 0.10       | (M+H) <sup>+</sup>                | C <sub>15</sub> H <sub>21</sub> F <sub>3</sub> O <sub>3</sub> S <sub>2</sub> |          |
| 412.1041 | 1 | 223   | 100.00  | 412.1040   | 0.07       | (M+NH <sub>4</sub> ) <sup>+</sup> | C <sub>15</sub> H <sub>21</sub> F <sub>3</sub> O <sub>3</sub> S <sub>2</sub> |          |
| 90.0733  |   | 133   | 59.71   |            |            |                                   |                                                                              |          |

Spectrum Identification Table

| Best ID Source | Name | Formula                                                                      | Species                           | m/z      | Diff (ppm) | CAS | Score | Score (Lib) | Score (DB) | Score (MFG) | Lib/DB |
|----------------|------|------------------------------------------------------------------------------|-----------------------------------|----------|------------|-----|-------|-------------|------------|-------------|--------|
| No             | MFG  | C <sub>15</sub> H <sub>21</sub> F <sub>3</sub> O <sub>3</sub> S <sub>2</sub> | (M+H) <sup>+</sup>                | 395.0775 | -0.19      |     | 96.82 |             |            | 96.82       |        |
| No             | MFG  | C <sub>15</sub> H <sub>21</sub> F <sub>3</sub> O <sub>3</sub> S <sub>2</sub> | (M+NH <sub>4</sub> ) <sup>+</sup> | 412.1041 | 0.07       |     | 96.58 |             |            | 96.58       |        |

MassHunter Qual 10.0  
(End of Report)

**HRMS (ESI) Analysis of compound SI-25: 2-((7-(diethylamino)-2-oxo-2H-chromen-4-yl)methyl)isoindoline-1,3-dione**

sejea07thr3 #1 RT: 0.02 AV: 1 NL: 4.41E7  
T: FTMS + p APCI corona Full ms [110.00-800.00]

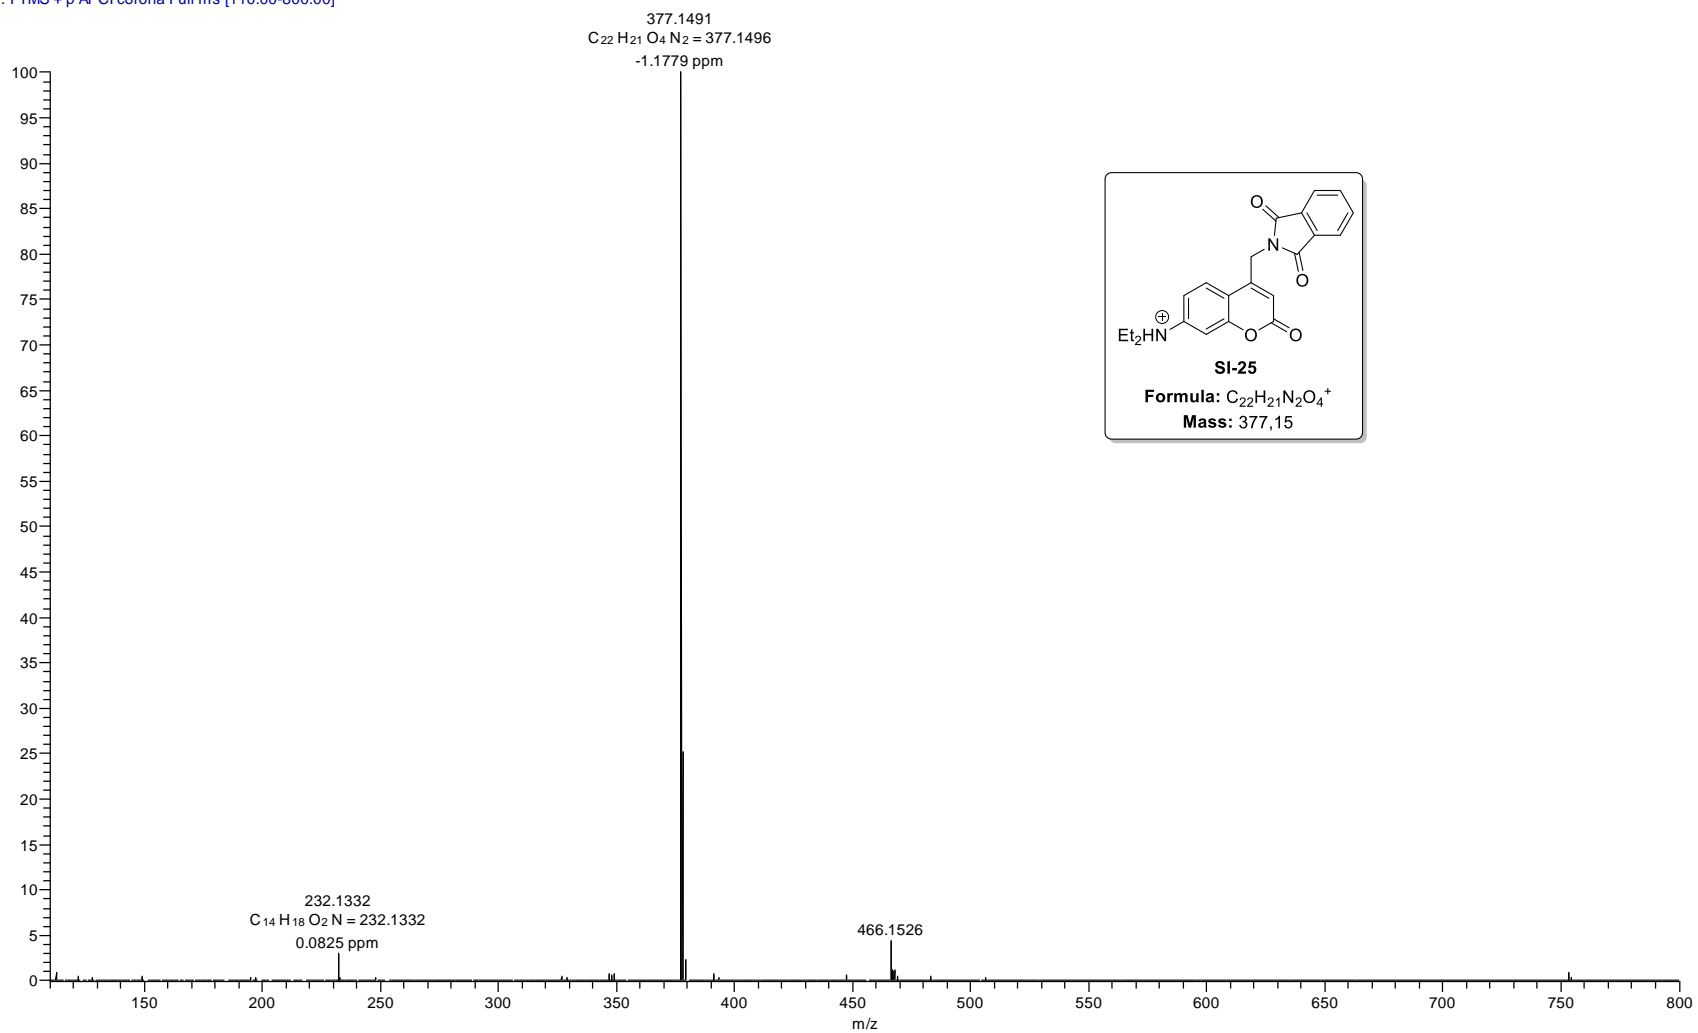

**HRMS (ESI) Analysis of compound SI-26: 4-(aminomethyl)-7-(diethylamino)-2H-chromen-2-one (Amino-DEACM)**

sejea09shr1 #1 RT: 0.02 AV: 1 NL: 6.17E7  
T: FTMS + p ESI Full ms [100.00-700.00]

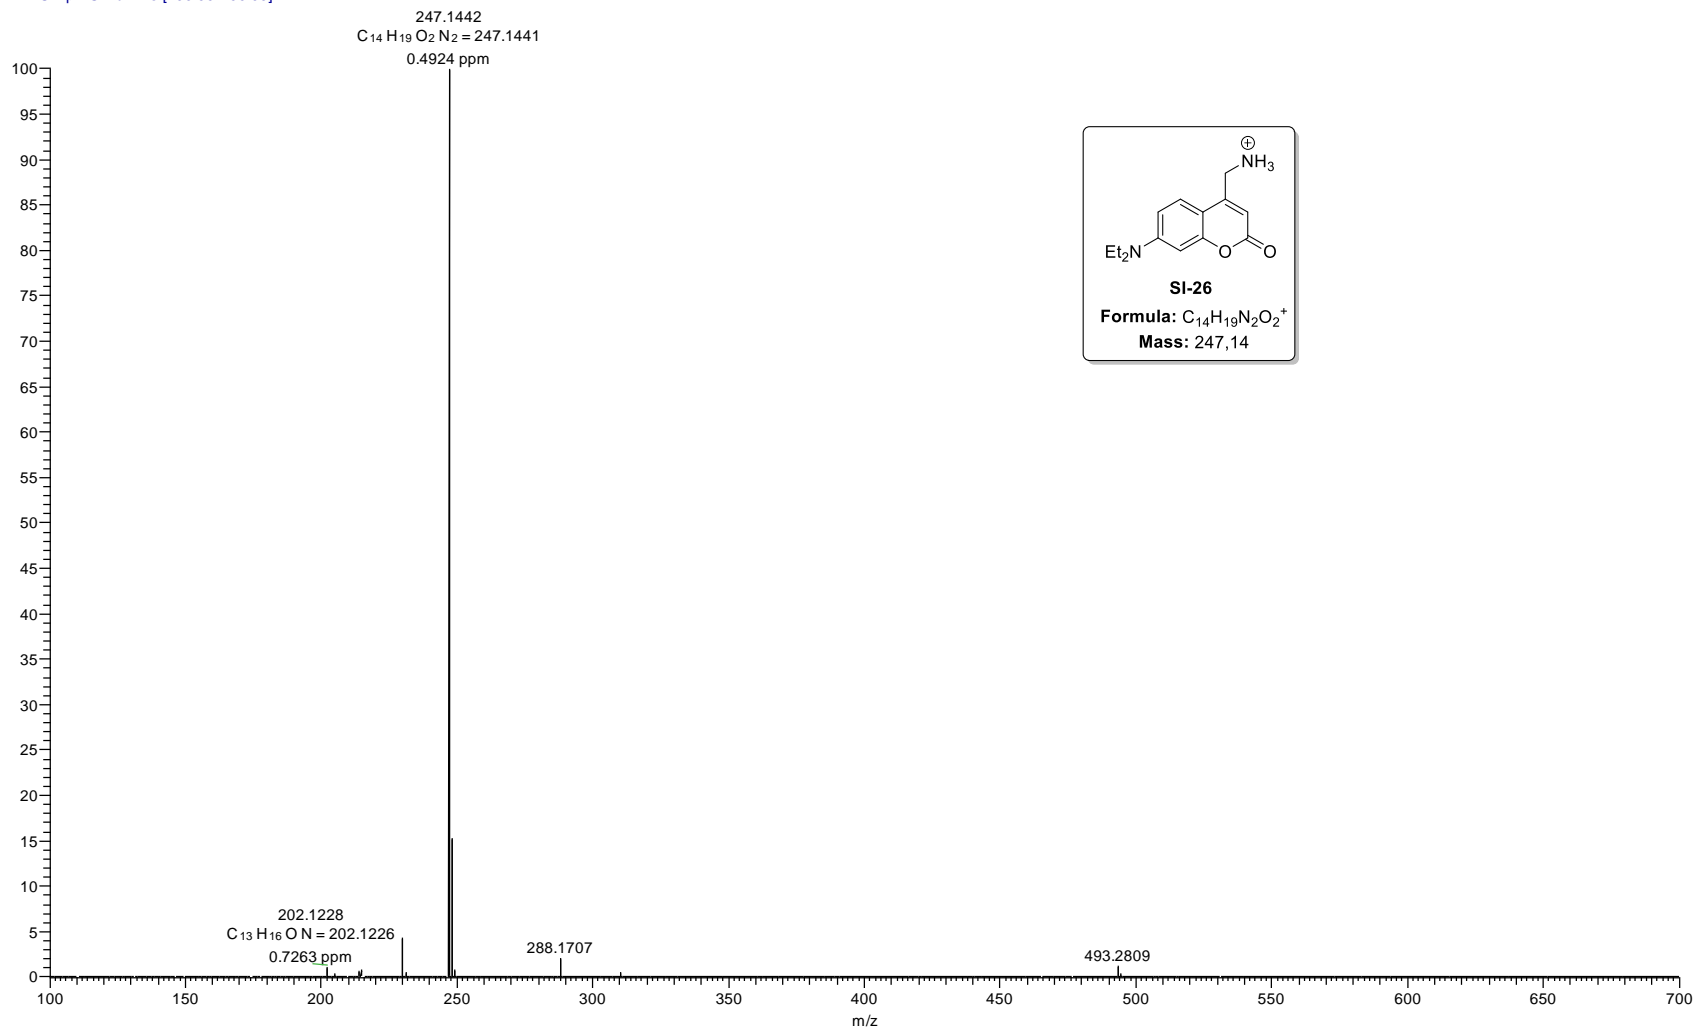

## 14. Structure Tables (X-ray data)

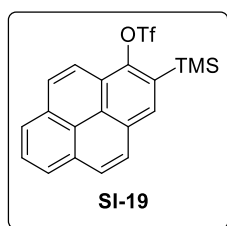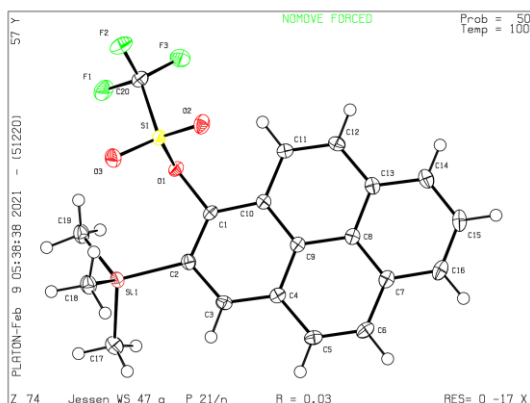

Crystals were obtained from a solvent mixture of dichloromethane and chloroform in which the compound was dissolved at 40 °C. The solution was first cooled down to room temperature, and slow evaporation of the solvent caused the formation of crystals. The data for Jessen\_WS\_47\_a were collected from a shock-cooled single crystal at 100(2) K on a Bruker SMART APEX2 QUAZAR three-circle diffractometer with a microfocus sealed X-ray tube using mirror optics as monochromator and a Bruker APEXII detector. The diffractometer was equipped with an Oxford Cryostream 800 low temperature device and used MoK $\alpha$  radiation ( $\lambda = 0.71073$  Å). All data were integrated with SAINT and a multi-scan absorption correction using SADABS was applied.<sup>[1,2]</sup> The structure were solved by direct methods using SHELXT and refined by full-matrix least-squares methods against  $F^2$  by SHELXL-2018/3.<sup>[3,4]</sup> All non-hydrogen atoms were refined with anisotropic displacement parameters. The hydrogen atoms were refined isotropically on calculated positions using a riding model with their  $U_{iso}$  values constrained to 1.5 times the  $U_{eq}$  of their pivot atoms for terminal  $sp^3$  carbon atoms and 1.2 times for all other carbon atoms. Crystallographic data for the structures reported in this paper have been deposited with the Cambridge Crystallographic Data Centre.<sup>[5]</sup> CCDC 2062089 contain the supplementary crystallographic data for this paper. These data can be obtained free of charge from The Cambridge Crystallographic Data Centre via [www.ccdc.cam.ac.uk/structures](http://www.ccdc.cam.ac.uk/structures). This report and the CIF file were generated using FinalCif.<sup>[6]</sup>

Table 1. Crystal data and structure refinement for Jessen\_WS\_47\_a

|                                         |                                                                   |
|-----------------------------------------|-------------------------------------------------------------------|
| CCDC number                             | 2062089                                                           |
| Empirical formula                       | C <sub>20</sub> H <sub>17</sub> F <sub>3</sub> O <sub>3</sub> SSi |
| Formula weight                          | 422.48                                                            |
| Temperature [K]                         | 100(2)                                                            |
| Crystal system                          | monoclinic                                                        |
| Space group (number)                    | $P2_1/n$ (14)                                                     |
| $a$ [Å]                                 | 8.9023(7)                                                         |
| $b$ [Å]                                 | 16.4839(12)                                                       |
| $c$ [Å]                                 | 13.5475(10)                                                       |
| $\alpha$ [°]                            | 90                                                                |
| $\beta$ [°]                             | 107.9570(10)                                                      |
| $\gamma$ [°]                            | 90                                                                |
| Volume [Å <sup>3</sup> ]                | 1891.2(2)                                                         |
| $Z$                                     | 4                                                                 |
| $\rho_{calc}$ [gcm <sup>-3</sup> ]      | 1.484                                                             |
| $\mu$ [mm <sup>-1</sup> ]               | 0.282                                                             |
| $F(000)$                                | 872                                                               |
| Crystal size [mm <sup>3</sup> ]         | 0.170×0.150×0.100                                                 |
| Crystal colour                          | colourless                                                        |
| Crystal shape                           | block                                                             |
| Radiation                               | MoK $\alpha$ ( $\lambda=0.71073$ Å)                               |
| 2 $\theta$ range [°]                    | 4.01 to 55.11 (0.77 Å)                                            |
| Index ranges                            | -11 ≤ $h$ ≤ 11<br>-21 ≤ $k$ ≤ 21<br>-17 ≤ $l$ ≤ 17                |
| Reflections collected                   | 39111                                                             |
| Independent reflections                 | 4368<br>$R_{int} = 0.0298$<br>$R_{sigma} = 0.0160$                |
| Completeness to $\theta = 25.242^\circ$ | 99.9 %                                                            |
| Data / Restraints / Parameters          | 4368/0/256                                                        |
| Goodness-of-fit on $F^2$                | 1.062                                                             |
| Final $R$ indexes [ $\geq 2\sigma(I)$ ] | $R_1 = 0.0290$<br>$wR_2 = 0.0780$                                 |
| Final $R$ indexes [all data]            | $R_1 = 0.0341$<br>$wR_2 = 0.0814$                                 |
| Largest peak/hole [eÅ <sup>-3</sup> ]   | 0.47/-0.37                                                        |



Table 2. Atomic coordinates and  $U_{eq}$  [ $\text{\AA}^2$ ] for Jessen\_WS\_47\_a

| Atom | x           | y          | z           | $U_{eq}$    |
|------|-------------|------------|-------------|-------------|
| S1   | 0.30474(4)  | 0.35973(2) | 0.81748(2)  | 0.01550(9)  |
| Si1  | 0.29667(4)  | 0.17974(2) | 0.61769(3)  | 0.01555(9)  |
| F1   | 0.06123(11) | 0.30635(6) | 0.86700(7)  | 0.0295(2)   |
| F2   | 0.22234(11) | 0.38224(6) | 0.98151(7)  | 0.0311(2)   |
| F3   | 0.06171(11) | 0.43591(6) | 0.84399(7)  | 0.0285(2)   |
| O1   | 0.18751(11) | 0.34506(6) | 0.70625(7)  | 0.01582(19) |
| O2   | 0.38573(12) | 0.43487(6) | 0.82526(8)  | 0.0215(2)   |
| O3   | 0.38844(12) | 0.28781(6) | 0.85899(8)  | 0.0230(2)   |
| C1   | 0.24254(15) | 0.35737(8) | 0.61689(10) | 0.0144(3)   |
| C2   | 0.29429(15) | 0.28991(8) | 0.57493(10) | 0.0152(3)   |
| C3   | 0.34438(15) | 0.30589(8) | 0.48816(10) | 0.0163(3)   |
| H3   | 0.382620    | 0.261986   | 0.457278    | 0.020       |
| C4   | 0.34077(15) | 0.38317(8) | 0.44499(10) | 0.0150(3)   |
| C5   | 0.39467(15) | 0.39853(9) | 0.35686(10) | 0.0178(3)   |
| H5   | 0.437703    | 0.355154   | 0.328064    | 0.021       |
| C6   | 0.38552(15) | 0.47321(9) | 0.31410(11) | 0.0188(3)   |
| H6   | 0.422691    | 0.481374   | 0.256218    | 0.023       |
| C7   | 0.32021(15) | 0.54065(8) | 0.35500(10) | 0.0169(3)   |
| C8   | 0.26746(14) | 0.52759(8) | 0.44262(10) | 0.0147(3)   |
| C9   | 0.27939(14) | 0.44887(8) | 0.48850(10) | 0.0136(2)   |
| C10  | 0.22802(14) | 0.43633(8) | 0.57686(10) | 0.0140(2)   |
| C11  | 0.16150(15) | 0.50339(8) | 0.61727(10) | 0.0161(3)   |
| H11  | 0.125846    | 0.495479   | 0.675832    | 0.019       |
| C12  | 0.14924(15) | 0.57750(8) | 0.57274(10) | 0.0168(3)   |
| H12  | 0.104224    | 0.620686   | 0.600560    | 0.020       |
| C13  | 0.20222(15) | 0.59273(8) | 0.48479(10) | 0.0161(3)   |
| C14  | 0.18988(16) | 0.66940(8) | 0.43789(11) | 0.0198(3)   |
| H14  | 0.145873    | 0.713327   | 0.465080    | 0.024       |
| C15  | 0.24139(17) | 0.68170(9) | 0.35211(11) | 0.0222(3)   |
| H15  | 0.231951    | 0.733909   | 0.321101    | 0.027       |
| C16  | 0.30659(16) | 0.61836(9) | 0.31123(11) | 0.0207(3)   |
| H16  | 0.342294    | 0.627859   | 0.253003    | 0.025       |
| C17  | 0.26384(18) | 0.11607(9) | 0.49861(12) | 0.0239(3)   |
| H17A | 0.171902    | 0.136479   | 0.443748    | 0.036       |
| H17B | 0.245014    | 0.059708   | 0.514593    | 0.036       |
| H17C | 0.357394    | 0.118652   | 0.475107    | 0.036       |
| C18  | 0.49555(16) | 0.15408(9) | 0.70861(11) | 0.0207(3)   |
| H18A | 0.574641    | 0.158348   | 0.672075    | 0.031       |
| H18B | 0.494352    | 0.098537   | 0.734161    | 0.031       |
| H18C | 0.522058    | 0.191870   | 0.767300    | 0.031       |
| C19  | 0.13349(16) | 0.15804(9) | 0.67359(12) | 0.0213(3)   |
| H19A | 0.033441    | 0.177887   | 0.626151    | 0.032       |
| H19B | 0.155093    | 0.185437   | 0.740723    | 0.032       |
| H19C | 0.126339    | 0.099400   | 0.683205    | 0.032       |
| C20  | 0.15111(17) | 0.37193(9) | 0.88066(11) | 0.0209(3)   |

$U_{eq}$  is defined as 1/3 of the trace of the orthogonalized  $U_{ij}$  tensor.

Table 3. Bond lengths and angles for Jessen\_WS\_47\_a

| Atom-Atom | Length [ $\text{\AA}$ ] |       |            |
|-----------|-------------------------|-------|------------|
| S1-O3     |                         | S1-O3 | 1.4208(10) |
| S1-O2     | 1.4206(10)              | S1-O1 | 1.5648(10) |

|                       |                  |             |            |
|-----------------------|------------------|-------------|------------|
| S1-C20                | 1.8345(15)       | C18-Si1-C17 | 107.82(7)  |
| Si1-C18               | 1.8671(14)       | C19-Si1-C17 | 107.93(7)  |
| Si1-C19               | 1.8682(14)       | C18-Si1-C2  | 109.64(6)  |
| Si1-C17               | 1.8705(15)       | C19-Si1-C2  | 111.64(6)  |
| Si1-C2                | 1.9041(14)       | C17-Si1-C2  | 106.78(6)  |
| F1-C20                | 1.3235(17)       | C1-O1-S1    | 118.98(8)  |
| F2-C20                | 1.3279(17)       | C2-C1-C10   | 125.99(12) |
| F3-C20                | 1.3224(17)       | C2-C1-O1    | 117.90(11) |
| O1-C1                 | 1.4534(15)       | C10-C1-O1   | 115.96(11) |
| C1-C2                 | 1.3905(18)       | C1-C2-C3    | 115.01(12) |
| C1-C10                | 1.4005(18)       | C1-C2-Si1   | 127.76(10) |
| C2-C3                 | 1.4048(18)       | C3-C2-Si1   | 117.18(10) |
| C3-C4                 | 1.3980(18)       | C4-C3-C2    | 123.28(12) |
| C3-H3                 | 0.9500           | C4-C3-H3    | 118.4      |
| C4-C9                 | 1.4204(18)       | C2-C3-H3    | 118.4      |
| C4-C5                 | 1.4398(18)       | C3-C4-C9    | 118.90(12) |
| C5-C6                 | 1.352(2)         | C3-C4-C5    | 122.46(12) |
| C5-H5                 | 0.9500           | C9-C4-C5    | 118.63(12) |
| C6-C7                 | 1.4421(19)       | C6-C5-C4    | 121.60(13) |
| C6-H6                 | 0.9500           | C6-C5-H5    | 119.2      |
| C7-C16                | 1.4010(19)       | C4-C5-H5    | 119.2      |
| C7-C8                 | 1.4210(18)       | C5-C6-C7    | 121.01(12) |
| C8-C13                | 1.4218(18)       | C5-C6-H6    | 119.5      |
| C8-C9                 | 1.4285(18)       | C7-C6-H6    | 119.5      |
| C9-C10                | 1.4220(18)       | C16-C7-C8   | 118.97(13) |
| C10-C11               | 1.4395(18)       | C16-C7-C6   | 122.32(13) |
| C11-C12               | 1.3520(19)       | C8-C7-C6    | 118.71(12) |
| C11-H11               | 0.9500           | C7-C8-C13   | 120.15(12) |
| C12-C13               | 1.4324(19)       | C7-C8-C9    | 120.12(12) |
| C12-H12               | 0.9500           | C13-C8-C9   | 119.73(12) |
| C13-C14               | 1.4035(19)       | C4-C9-C10   | 120.21(12) |
| C14-C15               | 1.389(2)         | C4-C9-C8    | 119.90(12) |
| C14-H14               | 0.9500           | C10-C9-C8   | 119.89(12) |
| C15-C16               | 1.390(2)         | C1-C10-C9   | 116.48(11) |
| C15-H15               | 0.9500           | C1-C10-C11  | 124.47(12) |
| C16-H16               | 0.9500           | C9-C10-C11  | 119.03(12) |
| C17-H17A              | 0.9800           | C12-C11-C10 | 120.69(12) |
| C17-H17B              | 0.9800           | C12-C11-H11 | 119.7      |
| C17-H17C              | 0.9800           | C10-C11-H11 | 119.7      |
| C18-H18A              | 0.9800           | C11-C12-C13 | 121.84(12) |
| C18-H18B              | 0.9800           | C11-C12-H12 | 119.1      |
| C18-H18C              | 0.9800           | C13-C12-H12 | 119.1      |
| C19-H19A              | 0.9800           | C14-C13-C8  | 118.87(13) |
| C19-H19B              | 0.9800           | C14-C13-C12 | 122.31(13) |
| C19-H19C              | 0.9800           | C8-C13-C12  | 118.81(12) |
|                       |                  | C15-C14-C13 | 120.67(13) |
|                       |                  | C15-C14-H14 | 119.7      |
|                       |                  | C13-C14-H14 | 119.7      |
|                       |                  | C14-C15-C16 | 120.64(13) |
|                       |                  | C14-C15-H15 | 119.7      |
|                       |                  | C16-C15-H15 | 119.7      |
|                       |                  | C15-C16-C7  | 120.69(13) |
|                       |                  | C15-C16-H16 | 119.7      |
|                       |                  | C7-C16-H16  | 119.7      |
| <b>Atom-Atom-Atom</b> | <b>Angle [°]</b> |             |            |
| O2-S1-O3              | 120.39(6)        |             |            |
| O2-S1-O1              | 112.26(6)        |             |            |
| O3-S1-O1              | 111.39(6)        |             |            |
| O2-S1-C20             | 107.71(6)        |             |            |
| O3-S1-C20             | 106.39(6)        |             |            |
| O1-S1-C20             | 95.42(6)         |             |            |
| C18-Si1-C19           | 112.76(7)        |             |            |

|               |       |               |            |
|---------------|-------|---------------|------------|
| Si1–C17–H17A  | 109.5 | Si1–C19–H19A  | 109.5      |
| Si1–C17–H17B  | 109.5 | Si1–C19–H19B  | 109.5      |
| H17A–C17–H17B | 109.5 | H19A–C19–H19B | 109.5      |
| Si1–C17–H17C  | 109.5 | Si1–C19–H19C  | 109.5      |
| H17A–C17–H17C | 109.5 | H19A–C19–H19C | 109.5      |
| H17B–C17–H17C | 109.5 | H19B–C19–H19C | 109.5      |
| Si1–C18–H18A  | 109.5 | F3–C20–F1     | 109.33(12) |
| Si1–C18–H18B  | 109.5 | F3–C20–F2     | 109.00(12) |
| H18A–C18–H18B | 109.5 | F1–C20–F2     | 108.96(11) |
| Si1–C18–H18C  | 109.5 | F3–C20–S1     | 111.16(9)  |
| H18A–C18–H18C | 109.5 | F1–C20–S1     | 110.53(10) |
| H18B–C18–H18C | 109.5 | F2–C20–S1     | 107.81(10) |

Table 4. Torsion angles for Jessen\_WS\_47\_a

| Atom–Atom–Atom–Atom | Torsion Angle [°] |                 |             |
|---------------------|-------------------|-----------------|-------------|
| O2–S1–O1–C1         | 48.43(11)         | C2–C1–C10–C9    | -3.7(2)     |
| O3–S1–O1–C1         | -89.94(10)        | O1–C1–C10–C9    | -179.13(10) |
| C20–S1–O1–C1        | 160.08(10)        | C2–C1–C10–C11   | 174.50(12)  |
| S1–O1–C1–C2         | 96.23(12)         | O1–C1–C10–C11   | -0.95(18)   |
| S1–O1–C1–C10        | -87.93(12)        | C4–C9–C10–C1    | 0.32(18)    |
| C10–C1–C2–C3        | 4.0(2)            | C8–C9–C10–C1    | 179.57(11)  |
| O1–C1–C2–C3         | 179.40(11)        | C4–C9–C10–C11   | -177.97(11) |
| C10–C1–C2–Si1       | -173.22(10)       | C8–C9–C10–C11   | 1.28(18)    |
| O1–C1–C2–Si1        | 2.16(18)          | C1–C10–C11–C12  | -178.78(12) |
| C1–C2–C3–C4         | -1.08(19)         | C9–C10–C11–C12  | -0.64(19)   |
| Si1–C2–C3–C4        | 176.47(10)        | C10–C11–C12–C13 | -0.4(2)     |
| C2–C3–C4–C9         | -1.9(2)           | C7–C8–C13–C14   | 0.53(19)    |
| C2–C3–C4–C5         | 179.13(12)        | C9–C8–C13–C14   | -179.30(12) |
| C3–C4–C5–C6         | 177.83(13)        | C7–C8–C13–C12   | 179.62(12)  |
| C9–C4–C5–C6         | -1.16(19)         | C9–C8–C13–C12   | -0.21(18)   |
| C4–C5–C6–C7         | -0.4(2)           | C11–C12–C13–C14 | 179.92(13)  |
| C5–C6–C7–C16        | -178.84(13)       | C11–C12–C13–C8  | 0.9(2)      |
| C5–C6–C7–C8         | 1.0(2)            | C8–C13–C14–C15  | -0.4(2)     |
| C16–C7–C8–C13       | -0.08(19)         | C12–C13–C14–C15 | -179.46(13) |
| C6–C7–C8–C13        | -179.90(12)       | C13–C14–C15–C16 | -0.2(2)     |
| C16–C7–C8–C9        | 179.75(12)        | C14–C15–C16–C7  | 0.7(2)      |
| C6–C7–C8–C9         | -0.07(18)         | C8–C7–C16–C15   | -0.5(2)     |
| C3–C4–C9–C10        | 2.25(19)          | C6–C7–C16–C15   | 179.29(13)  |
| C5–C4–C9–C10        | -178.72(11)       | O2–S1–C20–F3    | 52.21(12)   |
| C3–C4–C9–C8         | -176.99(12)       | O3–S1–C20–F3    | -177.44(10) |
| C5–C4–C9–C8         | 2.03(18)          | O1–S1–C20–F3    | -63.24(11)  |
| C7–C8–C9–C4         | -1.44(18)         | O2–S1–C20–F1    | 173.81(10)  |
| C13–C8–C9–C4        | 178.39(11)        | O3–S1–C20–F1    | -55.84(11)  |
| C7–C8–C9–C10        | 179.32(12)        | O1–S1–C20–F1    | 58.36(11)   |
| C13–C8–C9–C10       | -0.85(18)         | O2–S1–C20–F2    | -67.20(11)  |
|                     |                   | O3–S1–C20–F2    | 63.16(11)   |
|                     |                   | O1–S1–C20–F2    | 177.35(10)  |

## Bibliography (x-ray part)

[1] Bruker, *SAINTE*, V8.38A, Bruker AXS Inc., Madison, Wisconsin, USA.

- [2] L. Krause, R. Herbst-Irmer, G. M. Sheldrick, D. Stalke, *J. Appl. Cryst.* **2015**, *48*, 3–10, doi:10.1107/S1600576714022985.
- [3] G. M. Sheldrick, *Acta Cryst.* **2015**, *A71*, 3–8, doi:10.1107/S2053273314026370.
- [4] G. M. Sheldrick, *Acta Cryst.* **2015**, *C71*, 3–8, doi:10.1107/S2053229614024218.
- [5] C. R. Groom, I. J. Bruno, M. P. Lightfoot, S. C. Ward, *Acta Cryst.* **2016**, *B72*, 171–179, doi:10.1107/S2052520616003954.
- [6] D. Kratzert, *FinalCif*, *V84*, <https://www.xs3.uni-freiburg.de/research/finalcif>.
